# Supplementary material for: Adult mouse fibroblasts retain organ-specific transcriptomic identity
Source: eLife. 2022 Mar 16;11:e71008. doi: 10.7554/eLife.71008 (PMC8959603; doi:10.7554/eLife.71008)
Supplement: Figure 1—source data 1. [file elife-71008-fig1-data1.xlsx]

## Sheet: all highly expressed genes
			Raw
Gene Names	Probe Name	Min(Raw)	Gonad1	Gonad2	Gonad3	Heart1	Heart2	Heart3	Liver1	Liver2	Liver3	Lung1	Lung2	Lung3	Kidney1	Kidney2	Skin2	Skin3	Tail1	Tail2	Tail3	C3.5Kidney	B82.83Gonad	C3.5Gonad	C3.5Skin	B82.83Skin
0610010K14Rik	A_55_P2015410	11344.6	18765	12807.9	11468.6	17355.7	16937.5	17550.5	19077	19360.4	15874.6	22234.1	18951.1	19370	24162.3	19361.1	21092	24085.7	29545.9	29199.7	34101	21803	16295.1	11344.6	22281.6	24818.1
1110008F13Rik	A_51_P450100	24458	42712	33793.4	26886.1	31794.7	30673.5	26638.5	50140.5	39540.4	35563.1	48237.1	36528.1	34177	39563.8	32374.6	38357	40414.7	25376.9	26998.7	24458	38137	37333.6	27203.6	39817.6	41097.1
1500003O03Rik	A_55_P2045203	10868.6	18487	16418.9	12312.6	15469.7	14131	13863	18001	19756.4	16481.6	25635.1	22685.1	22382.5	13517.8	10868.6	12821.5	12957.2	14887.9	15125.2	15814	14817.5	18851.1	17191.6	16573.6	14867.1
1500032L24Rik	A_51_P501815	42089.1	62613	58757.9	42089.1	54620.2	56201.5	52224.5	74900.5	62164.9	64361.6	74984.1	62181.1	60017	55383.3	57855.6	52047.5	51974.7	50052.9	47645.7	56156	58800.5	59508.1	45930.6	46794.6	52085.6
1600029O15Rik	A_55_P1984152	27997.1	56339	41678.4	27997.1	48452.2	46799	41187.5	60818	42676.9	53744.1	66444.6	49543.1	57491	50743.8	57780.1	47445.5	50666.7	63565.9	51173.7	60823	60924.5	62232.1	44850.6	52822.6	52159.1
1700047I17Rik2	A_55_P2114269	40683.5	168485	163655	180377	153421	155147	152267	172055	177203	160604	177680	185046	159166	200367	163713	161958	148808	160122	150920	40683.5	180610	175826	153211	185908	177313
1700073E17Rik	A_52_P352563	24840.1	68565	45959.9	24840.1	56655.2	55665.5	53514	66949	48319.4	56202.6	75016.6	50290.1	60740.5	60872.3	54837.1	59910	55065.2	70182.4	64804.7	64642	67467.5	60914.1	45056.1	55846.6	56686.1
1810006K21Rik	A_52_P119117	11252.1	23693	13446.4	11252.1	16679.7	15314.5	13332.5	16620	16440.4	19304.1	19776.6	14837.1	15453	13935.3	18326.1	15826	15733.7	22760.9	18283.2	17934	17558.5	15249.1	12121.6	14119.6	15843.1
1810009A15Rik	A_55_P1968035	10601.1	22802.5	17335.9	12757.1	19138.7	19232	15561.5	24087.5	15738.9	17827.1	22939.1	16127.1	18155	22875.8	29141.1	21596.5	24736.7	17726.9	15984.7	14453	30018.5	16193.1	10601.1	15725.6	18382.1
1810022K09Rik	A_55_P2156944	19282.6	33888	21625.9	21424.1	25253.7	27540	21881.5	29489.5	21334.4	22064.6	28862.1	23632.1	21694.5	29376.8	29427.1	24436	29175.7	37025.4	22888.7	23166.5	31938	22805.1	19552.6	19586.6	19282.6
1810022K09Rik	A_55_P2078271	15308.6	24184	16131.4	16189.6	18583.2	19851.5	17209	21101.5	17772.4	16831.6	21068.6	19540.6	15865.5	26051.3	21977.1	17044	20745.7	24862.9	15659.2	19991	23280.5	17308.1	15308.6	15395.6	16736.1
1810037I17Rik	A_55_P2044593	13829.6	31490.5	19495.4	17455.1	17328.2	17842.5	13854.5	25949	17153.9	22253.1	23324.6	17083.1	16739	21575.8	24053.1	15701	16352.2	18677.9	15528.2	14791	23735.5	21463.1	17013.6	15945.6	13829.6
2010107E04Rik	A_66_P106536	30142.7	46415	37000.9	32331.6	34738.2	35728.5	35915.5	39948	37944.4	30239.6	40904.1	38235.1	37714.5	49509.8	38510.1	32966	39017.2	41652.9	30142.7	37060	40205.5	32425.1	30893.6	33136.6	36754.6
2210013O21Rik	A_51_P349192	12838.5	28636	22336.9	15513.1	14333.7	15778.5	12838.5	22334	16500.4	19196.1	20705.1	18715.1	22334	15143.8	13963.1	15430.5	16535.7	30169.9	28693.7	24219	16648.5	23271.6	23826.6	15004.6	13993.6
2310016M24Rik	A_51_P291839	14316	20939	16314.4	16232.1	18934.7	15838.5	14316	20915	18107.4	16154.1	22506.1	21515.6	18526.5	29009.8	23553.1	16054	17585.7	24922.9	19829.7	23915	17178.5	22799.1	16646.6	19110.6	16993.1
2310028O11Rik	A_55_P2123962	34360.1	68360.5	46124.9	45417.1	41971.2	41638.5	50523.5	51315	52428.4	41555.1	49818.1	48332.1	36565.5	74743.8	50200.1	46645	48892.7	53654.9	35558.7	47837.5	58952.5	40147.1	34360.1	52758.6	57621.1
2310036O22Rik	A_51_P286321	12023.5	18937	17520.9	13052.1	19409.7	16866	12023.5	20752	15734.4	23852.6	20733.1	13915.1	16024.5	18153.8	23617.1	18943	18164.7	14864.9	13453.2	13085	23102.5	16396.1	12978.6	16865.1	13826.1
2400001E08Rik	A_55_P2052185	11811	18295	15486.9	11931.1	15371.7	15154	14442	16803	16497.9	20276.6	17971.1	16197.1	15441.5	12137.8	13693.1	11811	13598.2	17166.9	17558.2	16843	17008.5	17083.1	14198.6	14677.1	13582.1
2510012J08Rik	A_51_P281806	11048.1	12739	15424.9	11048.1	18621.7	18573.5	15602	26270.5	20289.9	17642.6	22529.1	16812.1	16632	22793.3	20008.1	23504.5	23582.2	16627.9	17327.7	16652	23765	16800.1	12815.6	23528.1	22781.1
2610028H24Rik	A_55_P2153067	170881	219894	210968	210622	196257	214293	200483	246170	212805	200439	241302	223319	211588	258652	211537	221794	201909	196319	179653	170881	249954	220653	208412	224404	233651
2700029M09Rik	A_51_P450518	13396.1	25035.5	18419.4	13617.1	21514.7	22810	18264	25071.5	16553.4	16725.6	21979.6	16898.1	19925.5	26994.8	20170.6	18750	19778.2	17511.9	15812.7	13859.5	30229.5	17627.6	13684.1	13396.1	15375.1
2700060E02Rik	A_55_P1987121	29744.6	44152	33889.9	29744.6	32741.7	33006.5	34467.5	42495	38251.9	38536.6	41494.1	41803.6	37544	43164.8	37107.1	34278	35940.7	43172.4	36143.7	41009	43350.5	40022.1	33418.6	42743.6	42307.6
2810002N01Rik	A_55_P2060444	107076	134331	125780	139901	116902	124299	126630	145287	142930	123100	147089	149976	123780	174363	135748	134455	118034	124458	107076	116672	151691	134848	120964	149891	149413
2810002N01Rik	A_55_P2060445	11691.1	13062.5	13851.4	13636.6	14841.7	16032.5	19953.5	17187.5	18168.4	12415.6	17509.1	22610.6	15806.5	29250.3	11691.1	13354	12218.7	15125.9	13852.7	17764	18844.5	22173.1	17352.6	20675.6	22625.1
2900010J23Rik	A_55_P2040046	46547.1	93184	66127.4	46547.1	81878.7	82266.5	67162	85493.5	64492.9	75048.1	88111.1	77302.1	70377.5	68982.8	76960.1	69577	68504.7	85584.9	74708.2	70647	84084	71008.1	56534.6	54873.6	70817.1
2900010J23Rik	A_55_P2040048	20980.1	44883	33122.4	20980.1	44330.2	40912.5	30369.5	41486	29951.4	40258.1	43995.1	32537.1	35860	48157.8	51942.6	32571	34336.7	38363.4	40359.7	31221.5	46130.5	44628.1	30040.6	25833.6	31088.1
2900010M23Rik	A_55_P2055042	14181.6	24778	16639.9	19707.6	16726.7	16803.5	14874.5	20303	21846.9	22524.1	25505.1	16318.1	18142	17191.8	19863.1	17988	16901.2	23545.9	19753.7	22690.5	20117.5	19670.1	14181.6	22209.6	18438.6
2900064A13Rik	A_51_P336403	13299.6	24124.5	20363.4	13299.6	20842.7	21554.5	19898.5	24185.5	17981.9	21326.6	23978.1	16536.1	18282	15740.8	18812.1	18901	18444.7	22852.9	21710.2	19597	25792	25194.1	19564.1	18907.6	16636.6
2900073G15Rik	A_66_P107790	83684.6	127874	111025	101318	110383	111658	112565	141723	107669	134395	134184	113246	112859	152956	112014	94088	96907.7	99501.9	107444	116170	127603	106626	83684.6	87869.6	107536
2900092E17Rik	A_51_P279623	11611.1	17268	13676.4	11611.1	18777.7	18277.5	16920	20197	20524.4	14638.6	19647.1	16524.6	15805	18469.8	20926.6	19374	20645.7	16916.4	15844.2	14954	24711.5	17613.6	15862.6	31415.6	22179.1
3000002C10Rik	A_55_P2091247	35749	89948.5	73742.9	37050.6	56053.2	49400.5	35749	92690	67982.4	76290.6	102514	49134.1	65426.5	67981.8	99890.1	72115	70916.2	44369.9	49317.7	36805	94884.5	63929.1	47191.6	69551.1	73610.1
3110003A17Rik	A_55_P2071271	11972	35624	25482.9	25188.1	12048.2	11972	12317.5	32448	22134.9	24476.1	28287.6	22145.1	21934	31612.3	26535.1	22704	22606.7	19037.4	14635.7	16600	31520.5	17906.6	12122.6	19615.6	21258.6
4930401B11Rik	A_55_P2131193	22013.6	29655.5	24192.9	30896.1	34784.2	31341.5	43385.5	36031	43484.9	28773.6	37452.1	45861.1	32548.5	47715.3	31846.1	33234.5	29225.7	36183.9	26023.2	49013	32963.5	29264.1	22013.6	43429.1	45390.1
4933407C03Rik	A_55_P2058794	15043.1	22916.5	22631.4	15043.1	18113.7	16891.5	18071	22101.5	21328.9	15429.1	19098.1	16044.1	16352.5	37855.8	18875.1	23915.5	25206.7	17525.9	18930.7	19027	22355.5	18508.1	17576.6	24119.1	25334.1
4933434E20Rik	A_55_P2127688	10664.1	19931.5	16530.9	10664.1	17223.2	15974.5	16762.5	22004	17850.4	15406.6	20765.1	16358.6	16932.5	24761.8	18884.1	16430	17223.7	15520.4	14978.2	15522.5	24404.5	17631.1	13061.6	19525.6	20633.1
6330406I15Rik	A_55_P2065731	170269	186679	178671	183395	178267	179820	178152	196989	193793	184650	206512	194299	183317	216887	183626	187982	171587	185867	175016	170269	197334	194529	173170	208769	195166
9530068E07Rik	A_55_P2009477	32388.1	51434.5	50504.9	35082.1	53481.2	48977	48158.5	53146	52408.4	48235.6	57148.1	52062.1	54216	55800.8	32388.1	40344.5	38712.7	64482.9	67768.7	58271	48241	62455.6	68416.6	57022.1	45944.6
A730011L01Rik	A_55_P1954925	116993	142333	136135	152978	130317	130715	134055	145048	160591	132285	151665	163268	134853	193738	149264	135963	116993	138494	125573	123332	168647	151068	130421	168055	154283
Aars	A_51_P409429	13976.1	18595.5	20459.9	13976.1	26480.2	22972.5	20821	44847	29290.4	32705.1	32220.6	24429.6	25725.5	26779.8	20901.1	35020	35239.7	21274.9	24481.2	21791.5	24396.5	30142.1	18139.6	48608.6	40107.1
Acaa1a	A_55_P2076580	20784.1	33297.5	29009.4	20784.1	30798.7	26856.5	23991	46413	36998.9	30704.6	45025.6	42111.1	38609	29782.8	21211.1	23140	24617.7	39365.9	46076.2	46361.5	29218	43971.1	34849.6	47136.6	37212.1
Acadvl	A_55_P1991906	13398.1	24264	20598.9	13966.1	23187.7	21471	21664.5	24489.5	21529.4	18040.1	22695.1	20894.1	19681.5	21927.3	13398.1	20241	18972.7	26873.9	29338.7	29126	19112.5	23753.1	21236.6	28154.6	24888.1
Acly	A_55_P2025954	11135.5	18502	17819.9	15028.1	12215.2	11135.5	12401.5	20739	21278.9	15155.6	20066.1	16211.6	14268	34521.3	29643.1	17254	18503.7	18715.9	20104.7	20838	30332.5	17240.1	14304.6	24030.1	26352.6
Aco2	A_52_P200359	13157.1	22849	21059.9	13157.1	21059.7	18772	17197.5	28013	26439.4	28337.6	25397.6	19563.6	19824.5	24674.8	29386.1	22094	22605.7	22699.9	24022.2	19223.5	28890.5	17910.1	16431.6	26444.1	20968.1
Acot13	A_51_P502422	11465	27547	23280.9	16774.1	19286.7	17314	14464.5	21734.5	13196.4	13648.6	25347.1	19701.6	21971.5	30574.8	21526.1	11465	11867.7	16464.9	13051.2	13337	18434.5	25016.6	20697.6	14944.6	16102.1
Acta2	A_52_P420504	202707	400297	371087	362156	226205	222317	202707	395408	368281	401870	395356	312934	351141	290723	323142	347117	326562	269845	276010	285972	343868	358955	341004	310867	311092
Actb	A_55_P2112737	319241	382126	345549	337134	353628	352837	325998	380659	355604	379946	391235	357130	348914	369621	351093	360911	333462	359814	338382	346989	369292	350663	319241	355309	327421
Actg1	A_55_P1970597	213907	291177	251329	262526	237784	228430	258345	266358	307547	285476	282214	291343	243905	314744	273609	257624	224448	266574	262543	269377	286800	243003	213907	306809	269502
Actg1	A_55_P2114993	103320	116290	108125	126856	117038	112650	115281	128504	127627	118907	127720	131058	112157	162544	122269	122508	107066	115289	106311	126620	116576	116822	103320	134292	130930
Actg1	A_55_P1985984	30780.6	107427	88313.4	30780.6	57208.7	49331.5	64152.5	108134	79297.4	103434	96076.6	66901.1	75259	110512	60923.1	74289.5	69503.2	60567.9	68461.2	62957.5	100570	75648.1	54370.1	61716.6	76941.1
Actg1	A_52_P72237	25534.1	99741.5	80741.9	25534.1	43857.7	38803	50227	95554	59862.4	91119.6	49922.1	32691.1	36294	92930.8	54611.1	69785	65540.7	45505.4	52281.7	51393	84505.5	51916.1	38700.1	55298.6	64905.1
Actn4	A_51_P394788	32569.6	74316	67885.9	43963.6	38052.2	37070.5	36666	59429	45188.9	63365.6	54052.6	43704.6	50707	48145.8	53874.1	47730	44801.7	37709.4	44051.7	32921.5	55736.5	63179.1	48646.6	32569.6	37276.1
Actr10	A_55_P2030805	24929.1	31865	31347.9	24929.1	33248.7	32508.5	30227.5	39266	32695.4	32216.6	35406.1	30141.1	33806	40854.3	32190.1	31333	29408.7	34593.9	32173.2	32592	38058	34897.1	26376.6	31225.1	33459.1
Actr1a	A_51_P509760	15537.5	28024	24200.9	17533.1	24173.7	20407.5	15537.5	26881	25292.4	30380.6	27511.1	18517.1	20280.5	27194.3	27791.1	22859	24143.2	19541.9	19850.7	16321	27256	20749.6	15926.1	25607.6	18935.1
Actr3	A_51_P217535	25144.6	41504.5	42752.9	29221.1	28932.2	28154.5	29760.5	55958.5	43581.9	44053.1	46757.1	37497.1	44678	49958.8	48276.1	43158.5	41580.7	42568.9	39934.7	41023	46893.5	35533.1	25144.6	35615.6	41552.1
Adam15	A_55_P2055819	34627.6	56762.5	60900.9	34627.6	51705.7	45935.5	47697.5	59601.5	70362.4	64301.6	65761.6	50650.1	55699	38849.8	36293.1	50354.5	45529.7	78074.4	90145.7	66197.5	47488.5	69049.6	61185.1	58410.6	49541.1
Adam9	A_55_P2025760	17111.1	29219	28980.9	21152.1	25468.7	26159.5	30676.5	35688	34811.4	35037.6	30988.6	27262.1	26045	23316.8	23507.6	20075	18215.7	17400.9	20395.7	19097	34673	31684.1	17111.1	20951.6	19957.1
Add1	A_55_P1990336	20285.6	39030	35830.9	22250.6	48399.7	44465	48417.5	36554	41236.4	32840.6	39466.1	37076.1	37984.5	32707.3	20285.6	28081	27049.7	41083.9	40913.2	41480	29576.5	41963.6	38549.1	33127.6	29356.1
Adipor2	A_52_P185044	12491.6	27020	21422.9	12491.6	17485.7	15731	12601	20688	17976.4	12869.1	21009.6	17268.6	17314	24937.8	15742.6	14399	14412.7	19763.9	19926.7	18060	23265.5	22520.6	16760.6	21169.6	22513.6
Aebp1	A_55_P2035662	86179.6	122397	132536	86179.6	133702	131639	138231	143001	145224	103290	187624	155045	139772	119602	114744	229520	220463	184280	226866	217423	132135	178503	150287	244995	171114
Aen	A_55_P2145804	35443.1	65737.5	61109.4	35443.1	53003.7	58694.5	51951.5	73857	48244.4	53663.6	51882.6	41604.1	42552	56544.8	54799.6	48412.5	47257.2	47802.9	52384.7	43918.5	69758.5	51438.1	47870.6	37862.1	39461.1
Aen	A_55_P2141860	29960.1	54442.5	48669.9	31017.6	43141.2	46732	41642	57333.5	41420.4	43077.1	40325.1	35854.6	32024	50884.8	43805.1	37616	38949.7	37977.9	39323.7	35625	56530	40280.1	37108.6	32341.6	29960.1
Aes	A_55_P1968285	36260.6	64286.5	54519.9	42587.1	60143.7	52216.5	59939	59305	60574.4	69588.6	65981.6	60486.1	56939	54927.8	36260.6	42738	40821.7	49939.9	52383.7	63437	39461	59784.1	56814.6	68803.1	52952.1
Agpat3	A_55_P2152592	11251	21541	23060.9	15611.6	25163.2	22142	21142.5	29432	26894.4	25673.6	21902.6	21759.1	22617	27691.8	17991.1	11251	12693.7	11946.9	14561.7	13401	20569	24578.1	18132.1	13331.6	13830.1
Agpat4	A_51_P346165	10437.1	20586	13463.9	10437.1	18526.2	14794.5	16442	25802.5	23010.4	27819.6	15400.1	15954.6	12746	18254.3	13425.6	12805	12276.7	15217.4	15799.7	15219.5	13376	18187.1	10591.6	12894.6	15818.1
Ahnak	A_52_P263095	20279.2	38004	37233.9	30713.1	20279.2	23394.5	30142.5	27999	33439.9	39961.6	34738.1	30490.1	37646	36202.8	39322.1	27566.5	22311.7	48992.9	41028.7	43941	41998.5	46794.1	33807.1	28486.6	21068.1
Ahsa1	A_51_P173564	18170.6	31008.5	25386.9	18170.6	28880.7	27418.5	24443	38335	30403.9	26471.6	35476.1	26521.1	24606.5	35111.8	34323.1	37778.5	37361.7	26069.9	28412.7	27332	49298.5	24678.1	19254.6	38826.6	34660.1
Aimp2	A_55_P1993976	13363.6	29572	23242.9	18561.1	23031.2	25494.5	22028.5	37099	27248.9	24049.1	28354.6	22792.1	21790.5	30692.8	32089.1	31145.5	35323.7	19934.4	20685.2	19524	38911.5	19374.1	13363.6	23058.1	24407.1
Ak1	A_55_P2082688	45020.8	89567	75544.9	45886.1	72039.2	73390.5	72385.5	75512.5	58274.9	72902.6	59448.1	53403.1	52313	45020.8	58110.6	67054.5	69941.7	77568.9	92302.2	84325	69381.5	61703.6	60120.6	67461.6	67385.6
Akap12	A_51_P342567	15357.6	33542	35214.9	25309.1	27637.7	31187	35774.5	21351	23380.4	21534.6	36097.6	24623.1	31876.5	72713.8	75236.6	21559.5	23073.7	24053.4	25206.2	23435	81577.5	28969.1	19146.6	15357.6	18691.1
Akap2	A_52_P306305	23701.6	43989.5	46662.9	33592.1	45535.2	52674	40643	41611	35258.4	33539.1	39387.1	29901.1	28132.5	39223.3	24771.1	35405	33918.7	29899.9	27796.7	25108	41104	51169.6	48064.6	23701.6	30317.1
Akr1a4	A_51_P327295	28076.1	51316.5	40562.9	28076.1	44125.2	37773.5	33149	49967	49330.9	50983.1	54564.1	46098.1	41687	45455.8	43994.6	39657	39219.7	47461.9	45239.2	50120.5	48699.5	39830.1	32707.6	51376.6	42484.1
Akr1b3	A_52_P10041	11286.6	19075.5	14997.9	12203.1	23539.2	20529.5	14629	22213	16928.9	19828.1	24521.6	17579.1	18022	41725.8	32569.1	19296	20313.7	14020.9	16458.7	16514	27727	18583.6	11286.6	18372.1	16056.1
Akt1	A_55_P2066384	35221.9	53696.5	52059.4	35221.9	45818.4	39898.3	39928.8	57417	54332.4	57276.1	60055.1	44917.1	43408.7	49546.6	47446.6	42806.5	43875.7	39006.9	39928.4	39392	55101	41099.6	37536.6	47493.6	43695.1
Aldoa	A_55_P2007196	154471	259637	233476	171234	187186	183622	154471	290248	235014	235793	325590	227427	243554	198174	207142	234134	234129	198848	210372	195447	217097	257349	220780	250990	265824
Ammecr1l	A_55_P2025615	11445.6	17890	21095.9	11445.6	17814.7	18973.5	16772	26145.5	20438.4	17622.1	22900.6	19576.1	20123	28866.8	19459.1	19916	17715.7	22584.9	19590.7	19650	27562.5	25024.1	21775.6	22982.1	23556.1
Anapc11	A_51_P121390	13864.6	22628	17854.6	13864.6	16758.8	17282.2	16427.3	20889.9	20118.5	19741	23460.7	20918.1	21000.2	22161	20775.6	19971.1	23441.9	23865.6	21797.1	22521.2	25250.1	19874.6	17034	19393.3	19818.9
Anapc13	A_51_P368903	20676.1	42727.5	30029.4	20676.1	27705.7	26799.5	22545	33282	27994.4	31996.1	42773.1	31180.6	34686	25941.3	23713.1	25653.5	24727.7	45768.9	33002.7	36647.5	29760.5	33295.1	33540.6	23116.1	21759.1
Anapc4	A_51_P434198	23333.6	32579	28238.9	23333.6	30428.7	29739.5	31917	34061.5	32462.4	27015.6	33992.6	32812.6	30218	33677.8	25576.1	29852	27675.2	32914.9	29838.7	26643	33177	27946.1	23595.1	33316.1	29675.1
Anapc5	A_55_P1952359	50153.1	76681	65093.9	50153.1	86760.2	84193.5	87734.5	86734	93455.4	76885.6	104582	83372.6	84627.5	82461.8	67839.1	78706	79208.2	65943.4	68329.7	62875	82939	77509.1	57604.6	80087.1	80817.6
Anp32b	A_55_P1962811	10366.6	16989	14915.9	13160.6	20037.7	18964.5	18430.5	24114	22856.4	16659.6	24656.6	19505.1	18478	28408.8	27725.1	27528	24739.7	16552.9	14597.7	14890	31162.5	15707.6	10366.6	27374.6	24514.1
Anxa1	A_55_P2092826	80575.6	154715	141691	132729	127286	129685	135026	144977	136447	148163	130247	124751	128788	128658	102554	135801	128477	109290	99270.7	103754	130467	128618	105933	80575.6	97132.1
Anxa2	A_55_P2110713	171668	309430	271217	201687	238130	236867	206574	267498	243641	279013	287216	229679	246274	225781	216148	237323	223061	252280	252324	208086	251598	198887	171668	177941	176235
Anxa5	A_51_P426754	41251.1	111463	74863.9	49375.6	50897.7	50140.5	44856.5	113626	55812.4	84502.1	77529.1	54443.1	67487	78296.8	105508	48460	50740.2	44444.9	58740.7	46246	100654	54336.1	41251.1	55510.6	58713.6
Aoc2	A_55_P2042870	21199.7	29651	31906.9	51531.1	23470.2	27706	44139.5	38498	53547.4	23533.6	33939.6	55485.1	30337.5	75823.8	34787.1	30034	26262.7	24561.4	21199.7	31045	50911.5	37739.1	31563.1	59878.1	60263.1
Ap1s1	A_55_P1993268	31222.6	60676	50418.4	32402.1	55032.2	50814.5	55687	59982	54739.9	51161.6	58339.6	50354.6	48330	60955.8	46818.6	59960	61856.2	56372.9	58749.2	58864	61774.5	39552.1	31222.6	51175.1	50910.1
Ap1s1	A_55_P1992257	28754.1	62149.5	48903.9	28754.1	51684.7	49545.5	48403.5	56115	49513.9	47279.1	56232.1	43177.1	45048.5	52286.8	45484.1	57520	58731.7	54118.4	53821.2	53273	58856.5	37777.1	29462.6	45213.6	43400.1
Ap2m1	A_55_P1969857	34335.1	55631	46115.9	34335.1	52937.7	44012.5	44906.5	56952.5	50074.4	63630.6	59598.6	44024.1	43334	59740.8	48097.1	44758	48109.7	48872.4	53662.7	41746	51901.5	42390.1	34473.6	55789.6	50608.6
App	A_55_P2012201	23618	37937.5	33929.7	27859.1	37078.9	31498.5	35460	46315.2	39646.4	36691.1	51469.6	49077.6	44474.7	45562.6	31956.6	24931.5	23618	30161.1	36802.2	32901.5	36694.3	58606.4	42210.1	37839.9	34835.3
Aprt	A_52_P594768	10117.6	20476	16421.9	13188.1	18932.7	17259.5	16278.5	23758	19306.9	20710.6	25481.1	18620.1	14800	24818.8	24046.1	16702	18088.2	15798.4	15697.7	17116	22437	11233.1	10117.6	13874.6	13321.1
Arf1	A_55_P2000090	28684.6	50856	34592.4	36098.1	36745.7	34033.5	44133.5	50284	56889.4	47049.6	48158.1	47212.1	34663	61613.8	55671.1	43691.5	41675.7	39154.9	33852.7	41853	52922.5	35878.6	28684.6	57228.6	55230.1
Arf4	A_51_P295625	10268.6	25457.5	22307.4	10268.6	16284.7	15899.5	16187.5	28039	16334.9	30469.1	27949.6	12378.1	24821	21352.8	26479.1	18813	15085.7	18089.9	18034.2	10813	30899.5	25947.1	19232.1	17027.1	20122.6
Arhgdia	A_55_P2047598	86514.6	142308	126559	87879.6	131757	124261	116346	145162	127250	154928	147983	113041	124522	110124	137282	132568	131025	96511.9	113310	102354	142140	107706	86514.6	119420	114688
Arhgdia	A_55_P2047599	28340.6	45760	44604.9	31338.6	48841.7	43684	35556.5	54486	45091.9	64420.6	55931.1	35311.1	43377.5	36865.3	51171.1	44336	44032.7	33075.9	38695.7	31500	49274.5	35941.1	28340.6	42839.6	36816.6
Arhgef2	A_55_P2125229	12633.1	14356	15253.9	13239.6	19349.7	18319.5	15787.5	38343	29582.4	24807.1	28656.1	26379.6	25271	31208.3	24155.1	25395	27970.7	15103.9	16376.2	17416.5	29897	28055.1	12633.1	38293.6	33029.1
Arhgef25	A_51_P451516	22510.1	42204.5	36036.9	26837.1	30349.7	22519	23166.5	36563	38804.9	39382.1	48520.6	41224.6	51925	31300.8	22510.1	24586	22832.7	41208.4	45784.7	38699	22855.5	54523.6	46147.6	39105.1	31361.1
Arl6ip4	A_66_P137157	10531.1	20447	16619.9	10531.1	21661.2	18359.5	18043	24630	19746.4	15766.6	23090.1	20133.1	17730.5	28791.8	20032.1	18963	20380.2	19606.4	18152.7	18298	22153	18168.1	13045.6	21533.6	18799.1
Arpc1b	A_55_P2023076	25996.6	32197	32932.4	31829.1	41862.7	39661.5	39283	40493	37859.4	35590.1	42072.1	41685.1	43966.5	31777.8	25996.6	40572	39347.2	36304.9	40467.7	37725	34543.5	35895.1	26376.6	38429.1	41993.1
Arpc2	A_55_P1980831	82756.6	135524	115105	92085.1	100908	100655	95198.5	153082	120218	140113	149687	130027	124164	119968	123239	100868	101324	108653	112664	106744	139975	122529	82756.6	91328.1	97415.1
Arpc3	A_55_P2064792	11628.6	25583	19402.9	11628.6	23306.2	20339.5	16360.5	25809	19630.4	23198.1	26450.1	18869.1	20472	22675.8	23682.1	20178	19390.7	23420.4	21820.7	19070	20347	23759.1	18083.6	19358.6	20358.1
Arpc3	A_55_P2023953	11532.6	21634	15222.9	11532.6	19588.7	17507.5	18821.5	20561	19668.4	17265.1	21502.1	21294.1	16983	22411.3	19881.1	18476.5	18336.7	22163.9	17880.7	20692	16887	17765.1	14397.1	19809.6	21300.1
Arpc5	A_55_P2000390	21168.1	49819	41228.9	34424.1	25625.7	24570.5	24745.5	52144	36381.4	42709.6	47769.1	36406.1	37624	54985.8	47295.1	35763	33431.7	35496.9	34406.2	32049	52886.5	34055.1	21168.1	30659.1	37794.6
Asns	A_55_P1959748	22757.6	38930	33708.9	27565.6	41563.7	37295	41194.5	92675	63888.4	55799.1	54453.1	52661.1	44607.5	57720.3	39167.1	72780	82073.7	41294.9	38651.2	50895	62193.5	53483.6	22757.6	67269.6	83273.1
Atf4	A_55_P1979728	75935.1	107891	96444.4	75935.1	92643.7	99035.5	95917	170212	136668	128539	143821	137556	120358	126497	118029	151539	155390	131921	121590	111481	120782	115186	87433.6	170604	161706
Atf5	A_55_P2105858	57657.1	72022	74392.9	64322.6	112538	98955.5	114763	144549	153697	148605	151254	168626	141156	63335.8	57657.1	130279	132463	103417	114232	154647	87846.5	155781	97204.1	219322	171221
Atox1	A_55_P2000107	33404.5	55193	43746.9	44627.1	36629.2	37694	33404.5	44375	46586.4	40808.1	49464.1	38992.1	37528.5	55429.8	50676.1	35503	41799.7	40575.9	34951.2	42080.5	44969	39981.1	41088.6	53468.1	49590.1
Atp5a1	A_55_P2041340	25747.5	31995	29979.9	27514.1	30215.2	25747.5	38226	38517.5	48395.4	29818.6	38677.6	41189.1	32538	53163.8	28558.1	33381	32262.7	30447.4	32798.2	43871.5	38036	33684.1	26777.6	48869.1	44459.6
Atp5b	A_52_P328078	86068.6	160997	127984	110006	124211	115685	132879	159235	161041	136209	157477	139680	122311	187126	140689	147143	128766	104200	123391	128317	164711	122517	86068.6	153496	161572
Atp5c1	A_55_P2150908	32755.6	51521.5	38841.9	32908.6	33418.2	34023.5	34866.5	51773.5	45719.9	39480.6	49853.1	39486.6	38466.5	54031.3	37606.1	44195	42141.7	46338.9	38101.7	42871	46717	37957.1	32755.6	42489.6	46436.6
Atp5d	A_55_P2061690	13919.1	28809	23582.9	13919.1	26175.7	21243.5	19067.5	31184	26310.9	31420.1	32721.1	23887.6	25113	27862.8	32220.1	23413	25882.7	21636.9	22964.7	23026	27301.5	23011.1	16565.6	26183.1	21987.1
Atp5e	A_51_P362054	35039.1	55463	41442.4	38751.6	50611.7	44149.5	39704.5	45947	40438.4	48626.1	51806.1	49781.6	46964.5	40766.8	48485.6	38927	41221.2	65530.9	52400.2	45017.5	39627	55722.1	51515.6	44631.1	35039.1
Atp5g1	A_55_P2001683	30097.1	63314	43919.9	38187.1	54155.7	51574.5	48981.5	64589.5	53292.4	58206.1	62968.1	52445.1	40926	53423.3	44558.1	51827	60121.7	45229.9	46202.2	52265	52827	40894.1	30097.1	42207.6	53872.6
Atp5g2	A_55_P2081483	54810.1	100274	67453.9	54810.1	90043.7	88030.5	83666	109443	105111	93051.6	116628	96877.1	83156	107793	109942	89596.5	99039.7	102623	99304.7	103193	99398.5	83060.1	66684.1	101584	93669.6
Atp5g2	A_55_P2081482	49240.1	79038.5	59447.9	49240.1	80581.7	76467.5	76682.5	89290.5	89534.9	71082.6	92594.1	85907.1	70714	96884.8	88535.1	76771	84126.7	86731.9	75486.7	83110.5	82214	68617.6	56746.6	86243.6	77754.6
Atp5g3	A_55_P2046703	39405.6	63143	47104.9	43111.1	53255.7	49956.5	61781	59487	63551.4	41751.6	58976.1	62211.6	48874	85857.8	54859.6	57532.5	58431.2	51549.9	43689.7	60583	60371	46935.6	39405.6	61316.6	66222.6
Atp5h	A_55_P2152304	46583.6	68735.5	54056.9	46961.6	52359.7	50993	50618	58686	56223.4	49160.1	64035.1	54610.1	56754	59013.8	50375.1	51730	50352.2	63221.9	54391.2	65368	57767.5	56222.1	46583.6	54649.6	59054.1
Atp5h	A_55_P2152305	31833.5	49267	43362.9	35994.6	41892.2	41924	31833.5	50093.5	41414.9	44050.1	52372.1	41797.6	48076	44628.3	47038.1	42202.5	41832.7	52107.9	48367.7	42894.5	43142.5	49020.1	41596.6	42079.6	38604.1
Atp5j	A_55_P1963772	18226.2	24466	20853.4	18505.1	21170.7	20377.5	23055.5	23381.5	23515.9	19222.6	23499.1	24388.1	21706.5	29548.8	22624.1	20093	20275.7	20710.9	18226.2	23666	23331	19935.1	18414.6	21895.1	26441.1
Atp5j2	A_55_P2118906	48927.7	82726	55188.9	57199.6	60040.7	61063.5	56538	66115.5	65194.4	61938.6	70953.1	61181.1	56583	59819.3	52041.1	51802	56332.7	68188.4	48927.7	61688	53237.5	51566.1	49760.6	53532.1	52713.6
Atp5j2	A_55_P2081510	15762.1	37968.5	25037.4	15762.1	27285.7	25533.5	19894.5	30570	22987.9	29269.6	31753.6	23619.1	25523	26738.8	24665.6	21927.5	22814.7	29193.9	22237.2	22024	24446	25456.1	23367.1	19324.1	20248.1
Atp5k	A_55_P2168663	21843.6	41064.5	27143.9	29300.6	26198.7	26365	22376.5	31296	29490.4	27505.6	34088.1	28215.1	28920	31968.8	36963.6	26359.5	26168.2	35419.9	25255.7	27163	31813.5	25849.1	21843.6	26021.6	23787.1
Atp5k	A_55_P2149719	21639.6	42239	29347.4	33647.1	28546.7	26061	26907.5	31543	32801.4	29480.6	38419.1	34130.1	27943	37853.8	35758.1	25200	26022.7	36693.9	24437.7	30839.5	32274.5	26389.6	21639.6	29731.6	26102.1
Atp5k	A_55_P2168664	14989.1	28181	18245.4	22169.1	20234.7	18242.5	19054.5	20821.5	21927.4	18261.6	22932.1	22460.1	18997	29141.8	25631.1	17367.5	18361.7	24253.9	16779.7	21958	22532.5	19966.1	14989.1	19673.6	19895.1
Atp5l	A_55_P2002602	51069.1	74281	59935.9	51069.1	57333.2	61248.5	61720	69038	71305.4	60775.6	70887.1	65344.6	60512	68624.8	65420.6	56243.5	59503.2	79847.4	56927.7	64059.5	59580.5	60086.6	56866.6	58104.1	54903.6
Atp5l	A_55_P2000909	35705.7	54621.5	40797.4	36834.1	41328.7	41239.5	44695	47757.5	49168.4	40583.6	51415.1	44247.6	38376.5	47659.8	43169.6	38667	38777.7	54882.4	35705.7	45192	43551.5	40928.6	38349.6	45141.6	43604.1
Atp5l	A_55_P2024021	23319.2	37341	27005.4	31966.6	29098.7	27846.5	36395.5	31127	42815.9	27363.6	32933.1	38438.1	25466	43481.8	30024.1	26127.5	25431.7	37364.9	23319.2	38323	28227	27952.1	25556.6	36761.6	37218.1
Atp5l	A_55_P2026669	16128.2	23808	18405.9	18998.1	19631.7	19515.5	20666.5	21232.5	24805.4	18211.6	21859.1	23113.1	16703.5	27645.3	21430.6	17325	16811.7	25871.9	16128.2	21432	19809.5	19961.1	16264.1	21064.6	20498.1
Atp5l	A_55_P2048656	15903.6	22763.5	16795.4	20693.6	17931.7	17355	23543.5	20433.5	27828.9	17805.1	21768.1	24324.1	16525	30222.8	19716.1	16786.5	16617.2	24245.9	16119.7	25405	19338.5	19559.1	15903.6	25218.1	24824.6
Atp6v0c	A_55_P1979053	15112.6	35432	31422.4	15112.6	25486.2	25344.5	20626	37298.5	27061.9	36049.1	34770.1	22302.6	27860	31429.8	39956.1	24256	24162.7	29593.9	34238.7	22485	34221.5	28764.1	27383.6	24830.1	24533.1
Atp6v0e	A_51_P336874	27242.6	59992.5	41260.9	27242.6	34823.7	32689	29594.5	44526.5	35541.4	40870.6	40514.1	34636.1	32254.5	47571.8	39264.1	32193	31133.7	41868.4	39219.2	40137	41087	49148.1	38529.6	42533.1	40756.1
Atp6v1d	A_51_P393598	10813.7	17501.5	17462.9	10982.1	13055.7	13124	11725.5	20939.5	16172.4	16046.1	16480.1	15074.1	13526.5	22652.8	17212.6	11851.5	10813.7	18736.4	16669.7	16954	16829	17505.1	15147.1	16511.6	14950.1
Atp6v1f	A_55_P1973486	21828	36322	29289.9	22315.1	26713.7	25647.5	24355.5	34956	26589.9	28315.6	33141.6	29042.1	27934.5	37373.8	30348.6	21828	23327.2	33770.9	27566.7	35469	27428	30117.6	31109.1	29474.1	27854.1
ATP8	A_55_P2060111	13102.5	37194	25324.4	23624.1	21684.7	20314.5	13102.5	31373	20709.4	31488.6	31204.1	20527.1	26033	39571.8	30183.1	23011	24519.2	43027.9	28662.2	16579	30836	26296.6	26077.6	14625.6	21228.1
Atxn2l	A_52_P367060	14051	15911	18300.9	14229.6	16288.7	17286	14051	28575	20087.4	23402.6	24148.1	18559.6	20617	23942.3	21977.1	19731.5	19798.7	19178.9	20177.2	18044	26521.5	21073.1	18823.6	23799.6	24730.1
Aurkaip1	A_55_P2184113	38618.1	54450	52769.4	38618.1	53755.2	56687.5	49799.5	75046	49818.4	52187.6	63903.1	58005.6	59942	58506.8	57064.6	58048	63325.2	60214.9	56492.7	63129	57111	53404.1	44374.6	53534.1	58920.6
Aurkaip1	A_55_P2107302	35509.1	58033	44045.9	35509.1	49160.7	46937.5	37986.5	59451	40930.9	41699.1	61091.1	48416.6	50333	49113.8	47828.1	48089	51792.2	51378.9	46431.7	49988.5	54969.5	45524.6	35815.1	46681.1	45739.6
Axl	A_55_P2051414	12395.9	26396.5	24759.9	19753.1	20697.7	20298.5	20781	28395.5	27443.4	28022.6	29682.1	23039.1	22045.5	23202.3	31811.1	24309	22162.7	12395.9	16130.2	13544	32965	22111.1	15604.6	24130.1	27542.1
B4galt1	A_52_P103391	12494.4	14529.5	14451.9	13306.1	19585.2	19839.5	18901.5	21571	23778.4	18378.6	26621.1	25801.1	23543.5	14599.8	17080.1	20244	20839.7	12494.4	14475.7	13033	18966.5	26734.6	20535.1	37226.6	24782.6
Bag1	A_55_P2043317	41848.1	61125.5	65944.4	41848.1	65336.2	70775	61886	78124	55712.4	63676.1	74047.1	51028.1	64923	66615.8	66075.1	71547	72634.7	51830.4	57009.2	51516	78434	58526.1	51045.1	70704.1	77294.1
Bag1	A_55_P1973006	19168.6	31168	27462.9	24207.1	32282.7	29531	29840.5	33568.5	34504.4	28367.6	34439.1	34536.1	24610	46748.8	34010.1	29380	31085.7	23859.9	23756.7	23757	39614.5	28552.1	19168.6	48429.6	35526.6
Bat1a	A_55_P2069246	24034.6	34567.5	29101.4	24645.1	32869.7	30522	29538.5	35607.5	33007.9	40170.1	34491.1	27314.1	28928	34892.3	35720.1	29652.5	34287.7	30386.9	33534.7	26536.5	34946	25171.6	24034.6	32935.6	27058.1
Bat3	A_55_P2063795	11748.5	19812.5	17971.9	14876.1	15021.7	13786.5	11748.5	21223.5	16674.4	18758.1	21534.6	13806.1	15682	18554.8	21014.1	14829.5	15858.2	14095.9	20038.7	15981	20223	19106.6	16263.6	17532.6	16273.6
BC004004	A_55_P1956989	21281.1	34572	27674.9	21281.1	30690.7	30039.5	26161.5	35404	28709.4	30065.6	37655.1	31509.6	34060	28437.3	25320.1	33121	35357.2	40502.4	49136.2	38316.5	33512	34110.6	30519.6	35379.1	30169.1
BC004004	A_55_P2078048	13860.1	22406	22887.9	13860.1	27999.2	24566.5	19301.5	28106	20229.4	23534.6	27977.1	21225.6	25428	24672.3	21428.1	26941	27197.7	32546.4	33493.7	25445	25076.5	28938.1	22475.6	24222.6	20458.1
BC029722	A_66_P112399	13747.1	16856	18684.9	13747.1	17447.7	16320.5	14582	20476	18343.4	18507.6	22704.6	17929.1	17291	17278.8	17303.1	16597.5	16387.7	24951.9	27488.2	26171.5	16771.5	20538.1	19677.6	17100.6	14867.1
BC053749	A_55_P1988168	23065.7	48346	48553.9	75661.1	23065.7	24376.5	32083.5	46389	47376.4	63970.6	49965.1	36533.6	40745.5	46243.8	39183.1	41182	34309.2	31424.9	30696.7	24153.5	42716.5	64405.1	65346.1	26905.6	51574.1
Bloc1s1	A_55_P1992650	12544	26441	14845.9	16214.1	15776.7	15347.5	13869	18134	17039.9	15899.6	24985.6	21363.1	19052	16862.3	15424.1	12544	13483.7	24433.4	21148.7	27335.5	20322	21364.6	16578.6	18814.1	17759.1
Bloc1s1	A_55_P2110027	11744	23565	13476.9	13705.1	17574.7	13936.5	12075.5	17155	14450.4	14728.6	22563.1	17401.1	17468	22180.8	18338.6	11744	11805.7	22985.9	20498.2	22826.5	18933	23074.6	14276.6	15863.6	12646.1
Bmp1	A_55_P2006703	19749.1	33759	35225.9	19749.1	33422.7	32833	25203.5	56616	40868.4	34584.1	46339.6	25629.1	33599	45832.3	42219.1	59397	53181.2	31048.9	42871.7	26425.5	69330.5	52019.1	35192.1	78854.6	77224.1
Bnip2	A_66_P100561	29578.1	56603	50174.4	29578.1	37650.2	35484.5	34474.5	46807.5	37777.9	44350.6	50843.1	34885.1	36481	35727.8	32068.1	36407	35271.7	39373.9	37990.7	31481	49932.5	47162.6	40748.6	45947.6	32193.1
Bola2	A_55_P2040362	16791.6	35620	28553.9	25723.1	29096.7	28603.5	25988	33007	28280.4	26647.6	31476.6	23840.6	24255	37306.8	42001.1	36460	37162.2	26668.9	22038.7	29267	38942	23344.6	16791.6	30201.6	30160.6
Bptf	A_55_P2097244	10186.1	14401	16095.9	11220.1	10352.7	10782.5	11763	18097.5	16495.9	12174.6	15665.1	16612.6	15659	19399.8	10186.1	11241	10478.7	15871.9	14792.2	13543	17910.5	17623.1	16700.6	18054.6	13422.1
Brd2	A_55_P1958678	10387.1	11550	13702.4	10387.1	15482.2	13191.5	14913.5	17196.5	18018.4	14122.1	16383.1	16812.6	13474	21308.3	20585.6	14899	14138.7	11975.9	11719.2	13308.5	18885.5	12411.1	12017.1	21936.6	17538.1
Bri3	A_55_P2027436	22057.5	31723.5	26657.9	25226.1	23694.7	22057.5	24672.5	32842	35431.4	26490.6	34566.1	40257.1	29213.5	36891.8	24454.1	22097.5	23077.7	30540.4	29099.2	36339.5	28936	33507.1	26377.6	35878.6	30473.1
Btf3	A_55_P1968188	16800.6	27352	20114.9	27369.1	24927.7	21231.5	27415.5	28490	32389.9	22660.1	27124.1	31437.1	23412	45686.8	37065.1	26310.5	24817.7	26107.4	23693.7	33365.5	31180.5	25066.6	16800.6	36425.1	36568.6
Btg3	A_55_P1972322	22463.1	43708.5	41867.9	22463.1	32659.2	35403.5	26846.5	49911	32334.4	31498.6	41267.1	29913.6	29358	41701.3	44651.1	34541	35533.2	27140.9	26284.7	22476	61760	32660.1	25736.6	27715.6	33767.1
Bud31	A_55_P1965620	20466.1	34409	26383.4	20466.1	28312.2	32384.5	23571.5	42475	26414.9	28617.6	36475.6	26624.1	29342.5	32881.3	39061.1	34146	36054.7	34111.4	29858.7	28683.5	43186.5	28955.1	21589.6	28089.6	33422.1
Calm1	A_55_P2047489	62370.6	109344	96596.9	101381	92046.7	101787	92139	123259	117256	99683.1	106860	109872	91760.5	117152	96319.1	95719	104931	73168.9	70066.7	78702	103602	78772.6	62370.6	104395	106549
Calm2	A_55_P2129234	50746.1	86502	56612.4	50746.1	54152.7	55200	52676.5	72581	66505.9	78036.1	74624.6	62545.1	62851.5	62881.8	61867.1	58125	56785.7	65751.4	64697.7	55761.5	74437	76271.1	50845.1	59781.6	53531.6
Calm2	A_55_P2129232	43367.6	67691	54495.9	45081.6	55456.7	52620.5	51766.5	62117.5	57848.4	64370.6	66206.6	50712.1	57080	60220.8	49369.1	55927.5	51092.7	59337.9	53160.7	51716.5	58886.5	61826.1	43367.6	52449.1	52889.1
Calr	A_51_P416419	25059.6	34404	29358.9	28204.1	38294.2	33848.5	29855.5	43503	33480.9	48611.6	43543.1	28955.6	32314	38280.8	47133.6	33488.5	36615.7	34359.4	46115.7	38967.5	43432.5	33914.1	25059.6	32867.1	37513.6
Cand1	A_52_P57308	10202.1	15302.5	14455.9	10202.1	15684.7	14630.5	15820.5	17041	18283.4	14240.6	16026.1	15432.1	13633	20439.3	17227.1	16472.5	15876.7	15352.4	15321.2	14776	20422	14275.1	10474.6	20591.6	16754.6
Canx	A_52_P337679	21328.1	31044.5	30216.4	21328.1	23772.7	23322	26115.5	35389	28512.4	31235.6	31111.1	25726.1	26178	32109.8	30057.1	25846	24503.7	31852.9	32333.2	27980	33591.5	31597.1	30781.6	29673.6	27071.1
Capn2	A_55_P1987201	33783.6	66533	67922.9	52369.6	45855.7	42676.5	45018.5	67574	56664.4	66598.6	67753.6	56202.1	56120	64192.3	61715.1	48669	47814.7	54480.4	55205.2	51103.5	71004.5	61079.6	43336.1	33783.6	43080.1
Capns1	A_55_P2124528	54163.6	96277.5	77635.9	57670.1	87362.7	84036.5	81758.5	80311	65630.9	75060.6	86978.1	70875.1	76260.5	66446.3	57646.1	57305.5	58906.7	57208.9	68123.2	61141.5	69126.5	78290.1	88458.6	54163.6	54665.1
Capns1	A_55_P2026400	33723.6	67230	55410.9	39371.1	61266.7	54039.5	50713	50216.5	46158.4	61103.6	61051.6	45095.1	49940	46256.8	40806.1	35820	34100.2	48107.9	49633.7	46035	44934.5	57254.1	67884.6	35646.1	33723.6
Carhsp1	A_55_P2080163	10130.6	20433	16276.9	11794.1	27173.7	24795.5	24505.5	24097	20987.4	18369.6	23530.1	19983.1	18208.5	25864.8	20861.1	19229	20894.2	14462.9	14490.7	17247	21525.5	17095.6	10130.6	17914.6	21354.1
Cars	A_55_P2099358	16061.1	22025	23752.9	16061.1	31285.2	27657	20161.5	48140	27738.4	32083.6	32865.6	23254.1	27079	29342.8	28709.1	36745	36416.7	22061.9	24767.2	19718	28713.5	28878.6	16588.1	32366.6	30268.1
Ccdc107	A_66_P100565	13547	23188	19459.9	21793.6	21741.7	15374.5	13547	27411.5	22853.4	25529.6	26391.1	25936.1	24758	34415.3	23306.1	19872	18203.2	18275.4	18397.7	21002	18346	33450.1	20210.6	24637.6	20556.6
Ccdc138	A_55_P2043117	14820.1	22589.5	24188.4	14820.1	34490.2	35510.5	45441.5	28285	40724.4	20973.6	26239.1	45657.1	27479.5	58461.3	25866.1	21961.5	25690.7	36404.9	38410.7	53424	33590.5	24082.1	20362.1	60783.6	32422.1
Ccdc56	A_51_P226364	14169.6	21342	16959.9	16688.1	21805.7	17128	16871	23302.5	19101.9	19189.6	24329.1	21621.1	21056.5	31384.8	22134.1	14797	18489.7	18913.4	20286.7	24544	21741	21225.1	14169.6	19848.6	17674.1
Ccdc72	A_55_P2100864	12709.1	19697	15791.4	16283.1	14725.7	14800.5	16167.5	17279	18143.4	14401.6	19599.1	17823.1	15410	31972.8	26527.1	14482	14318.2	19663.4	13714.7	16218.5	20989.5	17549.1	12709.1	16509.6	17756.6
Ccm2	A_55_P1955577	18947.5	29448	24431.4	19810.1	20120.7	18947.5	20223.5	27835	26313.4	26386.1	27278.1	21272.1	20652	21694.3	20560.6	21845	22478.2	21162.4	21742.7	22767	27431	23344.1	20052.6	24684.6	26358.1
Ccnd2	A_52_P53906	14055.1	48144.5	41987.9	14055.1	20372.7	20213	21709.5	41814	27288.4	48539.1	34508.6	27682.6	29814	21626.8	14420.1	22311	19459.7	32687.4	33049.7	29215.5	33187.5	35168.1	36644.6	17889.1	26388.1
Cct2	A_51_P363914	34817.6	65124	57682.9	34817.6	53452.7	50545	45070.5	88680	58262.9	61111.6	70954.1	46467.1	51662	84567.8	81106.1	62296.5	65595.7	44416.9	45187.2	43679	95104.5	53507.6	39514.6	61587.1	62790.1
Cct5	A_51_P144783	25531.6	46441	36785.4	25655.1	43006.7	41424.5	44034.5	58095	52591.4	38456.6	47162.1	42165.6	37360	63599.3	49716.1	48465.5	49489.7	37979.4	34309.7	39483.5	56967	35225.1	25531.6	50788.1	49246.1
Cd164	A_52_P482983	18669.1	31518	26564.9	18669.1	26904.7	26503.5	27094.5	36515	27215.4	24897.6	36982.1	32746.1	34571.5	42586.8	37387.1	37592	39766.2	31793.9	33686.7	30848	42825.5	36159.1	30941.6	40767.6	42027.6
Cd63	A_55_P2000224	95852.6	157032	129194	95852.6	156208	156212	158264	151111	152210	123951	168011	144820	142480	160907	168070	164242	155389	176615	162604	164856	184450	143729	128304	198671	176198
Cd97	A_55_P2007022	12944.9	18919.5	22824.9	13744.1	25068.7	23501.5	22120.5	23768	25577.4	32421.6	21594.1	15906.1	19577.5	23465.8	18350.1	17618.5	13988.7	12944.9	17750.7	14532	24898.5	19908.1	14522.6	23648.6	24307.1
Cdc16	A_51_P508349	11041.6	14702.5	14472.9	11041.6	16151.2	13362.5	15422	19383	18358.4	14782.6	17599.1	16683.6	15356	17731.3	12512.1	16154	16362.7	20179.9	18334.7	19830	17023	15426.6	12843.6	18467.6	20458.1
Cdc34	A_55_P2027312	24746.6	40482	38498.4	26263.1	35202.2	33007.5	38580.5	52204	36394.4	33559.1	45235.1	37550.1	35131	60537.3	42621.1	41576	41255.7	35554.9	35000.2	37664	64043	34301.1	24746.6	33075.6	40174.6
Cdc37	A_52_P463143	48238.1	95139	86049.4	48238.1	76788.2	74535.5	67639.5	106677	81815.4	85691.6	105370	82894.1	89317	99219.8	94558.1	84989	89524.7	70979.9	85367.7	76995	117902	77602.1	62776.1	86967.6	84372.1
Cdc42	A_51_P230977	36357	56052.5	47710.9	39385.6	42564.7	38291	39132	48738	47022.4	53334.6	52093.6	39616.6	42861	45328.8	50992.1	36357	37399.7	44073.4	43657.7	46628.5	51218	49933.1	41697.6	43249.6	39490.6
Cdipt	A_51_P408471	13937.1	32094	25067.4	13937.1	25886.7	23131.5	20334.5	33808	21585.9	31229.6	31069.6	18555.1	22538	28883.8	26448.1	25028	24931.7	20754.9	26620.7	23597	30460.5	25703.1	19979.6	25163.1	23947.1
Cdk2ap1	A_55_P2048563	19387.6	35004	29042.4	24647.1	54297.7	48404	48553	46567	41820.4	34807.6	40962.1	37968.6	32921	52047.3	43587.1	43857	47078.2	28191.9	29194.2	27861	48139	29333.1	19387.6	41469.6	40529.6
Cdk4	A_55_P2163143	18323.1	30234	24848.4	19105.1	28853.7	24476.5	27050	35855	32517.4	29131.6	32383.1	27691.6	25910	39091.8	37030.1	30003.5	30966.7	28876.9	27718.7	29200	44040.5	19733.1	18323.1	34618.6	31220.1
Cdv3	A_55_P2040115	10725.6	19403	18319.9	14015.1	19310.7	15419.5	15647.5	24399	22023.9	17867.6	22408.1	19452.6	18239	38786.8	35388.1	24107	23621.7	21739.9	19254.7	16173	33434.5	17340.6	10725.6	21076.6	19889.6
Cfl1	A_55_P2000548	67925.6	112121	104804	93943.1	87062.7	85685.5	78261.5	123538	103980	131760	127336	96183.1	109506	117666	132477	107362	104709	84854.4	80359.7	83717.5	118619	87046.6	67925.6	89310.1	99765.1
Cfl1	A_52_P748958	20209.6	44230.5	36211.9	35175.1	28623.7	26994	25898.5	42067.5	33954.9	59363.6	45065.6	30654.1	35154	36910.8	54336.1	34687	37417.7	25311.9	25305.7	27019	36944.5	26146.6	20209.6	29993.6	32937.1
Chchd1	A_51_P329251	16037.6	26162	18944.9	19324.1	22289.7	27306.5	22702.5	34325.5	23260.9	22185.6	28464.1	25750.1	24911.5	37344.3	25857.1	26847.5	31170.7	27486.9	18507.7	24857	32573	20085.1	16037.6	21524.6	25571.1
Chchd2	A_55_P1992216	118676	181513	140711	125486	146045	148601	144705	184725	150726	132700	167115	166259	128663	206967	162026	159543	167374	155996	154375	170337	179342	148663	118676	172791	174036
Chd3	A_55_P2061386	10636.5	20669.5	24946.4	17126.1	11557.2	11033.5	10636.5	38561	23536.4	24870.1	41004.1	26710.1	29010	39548.8	31924.1	17914	15088.7	20684.9	19427.7	20334.5	34728.5	26864.1	21600.6	47929.6	33046.1
Chd4	A_55_P2020373	14506.1	17584	19201.4	14506.1	15599.7	15949.5	18162.5	21955	22564.4	17551.6	21708.1	20251.1	20354.5	30375.8	22760.1	21032.5	19707.7	19531.9	21544.7	20956	29161.5	20112.1	17737.6	28707.1	24346.1
Chpf	A_55_P2118268	13984.1	20604	19201.9	13984.1	32226.7	27883.5	23645.5	24055	28954.4	32138.6	28850.6	25929.1	27120	19860.3	20361.1	21317	22226.7	28664.9	36971.7	31201	19811.5	29947.6	28534.6	17374.6	14309.6
Cib1	A_55_P1982683	13634.6	21795	18851.9	16797.6	16688.7	16016.5	16868.5	19928	20316.4	17206.6	20581.1	19297.6	15372	27936.8	21209.6	15375	15942.7	15833.4	15834.2	18851	20320	16262.6	13634.6	23002.6	20255.1
Cic	A_55_P1952950	12009.1	19059	21073.9	12009.1	25148.7	27124.5	22209.5	24316	24837.4	19975.6	35429.1	29633.1	33454	25966.8	18635.6	22149	22201.7	29594.9	32293.7	25541	29344.5	27180.6	26314.6	25816.6	22746.1
Clasrp	A_52_P19016	11669.1	15608	14275.9	11669.1	14746.2	17471	13779	20955	16322.4	15254.6	20142.6	16068.1	16458	21170.8	17536.1	13877	14460.7	16843.4	18443.7	13145	21192.5	17745.6	16877.6	16915.6	16186.6
Clic1	A_51_P357341	45367.6	70612	66253.9	48426.1	75944.7	75524.5	74876	104877	85747.4	70200.6	88279.1	88596.1	69796	129861	114914	86059.5	93560.7	63317.9	59202.2	63942.5	127661	62267.6	45367.6	70557.1	89793.1
Clic4	A_51_P127681	16357.2	22262	23496.6	16357.2	21267.3	21655	21471.7	26356.7	30266.8	28390.8	31072.7	28656	29130.5	24608.9	19674.3	24172.7	24510.7	17656	18858.5	22455.3	24570.5	28592.7	19153.7	27238	28429.7
Clta	A_51_P197321	22856.1	37266	32794.4	22856.1	35573.7	32144.5	31583	42960.5	32229.4	38530.6	42695.6	33384.1	35343.5	34131.8	32781.1	31558	30483.7	33720.9	34639.7	36055	36217.5	35007.6	29635.1	33822.1	30675.1
Clta	A_55_P2128794	19345	31694	27459.4	19472.1	31764.7	27974.5	19345	38023	25031.4	32846.6	38379.1	24566.1	30732	24669.3	28504.1	27968	28482.7	30782.9	30657.7	22460	30835.5	31173.1	25041.6	27882.6	19531.1
Cltc	A_55_P2008884	16008.5	22385	19784.9	16515.6	18751.7	16008.5	20705	21901	22858.4	19672.1	22569.1	25167.1	20419.5	29567.3	20832.1	19851	17962.7	19880.9	18048.7	19350	23784.5	24832.6	16592.6	24433.1	23261.1
Cnih	A_51_P399625	35420	53403	54832.9	42303.1	41254.7	39506.5	35420	66466	51329.4	54733.6	62494.6	45227.1	52791	52059.8	49894.1	50151.5	49592.2	49240.9	45718.2	44812	58870.5	57341.1	47595.1	55145.6	58707.1
Cnih4	A_55_P1976017	14547.2	28379.5	25535.9	22256.6	19465.7	20991.5	17366	30351.5	23146.4	21730.6	28816.1	24651.1	23465.5	34273.3	35548.6	23988.5	29167.7	16897.9	14547.2	15027.5	37175.5	22328.1	16865.6	20711.6	22992.1
Cnn2	A_51_P427663	18520.5	41512	35601.4	27147.6	20732.7	18835.5	18520.5	42834	35039.4	47512.1	40276.6	31297.1	32457	31322.3	27705.1	28002.5	27528.2	24904.4	26775.7	26504.5	28299.5	33079.1	24950.6	26597.6	26806.1
Cnn3	A_55_P2130090	28651	54264	47962.9	34262.6	30983.2	29092.5	28651	50560	43170.9	53649.6	51849.1	40436.1	45916	48953.8	43995.1	33063	30720.7	31071.4	31629.2	30207.5	51514.5	37596.1	30118.6	35330.1	36299.1
Cnn3	A_55_P2040863	17878.5	35851.5	29221.9	25113.6	18558.7	20948.5	17878.5	36339	31795.4	31778.6	34131.6	30310.1	32723	29319.8	32979.6	22921.5	23425.7	25732.9	30670.7	26570.5	33958	28357.1	24385.6	25762.6	26730.1
Col1a1	A_55_P2118520	64546.9	67459	64546.9	85432.6	86186.7	72421	78369	77138	85399.4	78019.1	78587.6	84290.6	71158	107806	92251.6	76218	68192.7	72810.9	66772.2	84120	72896.5	84279.1	66440.6	89499.6	84984.1
Col1a2	A_51_P182303	271290	309341	286644	293027	318744	317923	322603	347997	344433	343337	354522	340794	323353	271290	271428	335587	317219	345191	317042	345388	320216	327448	311239	363306	345193
Col3a1	A_51_P515605	26337.8	59228.5	47233.4	55879.6	101631	88682	98266	79082	104737	86766.6	62409.6	65841.1	56101.5	26337.8	40655.1	69385	62540.7	49854.9	54148.7	47927.5	43167	141421	133904	145590	88115.1
Col5a1	A_51_P414637	14288.8	22562.5	23719.4	18943.1	31893.7	26614	23779.5	31676	27977.9	51342.6	29929.1	21393.1	28441	14288.8	22295.6	38956	32903.2	47724.9	61124.7	44371.5	21984.5	45058.1	36857.6	61555.6	39883.1
Comt	A_55_P1990653	18859.1	30602	28127.9	18859.1	50080.7	50744.5	44241	35412	30564.4	35438.1	32934.1	29217.6	28133.5	31257.3	19561.1	26661.5	28305.7	38907.9	38728.7	42109.5	25578.5	30876.1	27780.1	23277.6	26875.6
Copa	A_55_P2185712	11932.6	18727	19942.9	11932.6	19177.7	16694	18520.5	25679.5	19200.4	27807.6	25473.1	13938.1	19235	21825.8	15728.1	19937.5	18004.7	22110.4	21072.7	14032	21890.5	20371.1	19632.6	19083.1	21295.1
Copa	A_51_P109335	10710	14580.6	13843	10710	13601.3	12420.4	13245.1	17331.3	16208.7	18281.7	17282.6	11269.6	13152.1	14280.6	13278.6	13836.5	12839	15119.6	13756.6	12261.8	16103.5	13416.6	12527.3	15552.3	15587.2
Copb2	A_51_P243857	10508.1	15638	14997.4	10508.1	15894.2	15073	13489.5	19313	15363.9	19059.1	18283.1	14222.1	14912	14559.8	14516.1	15648	16003.2	17698.9	15558.7	13967	17566.5	15301.1	12291.6	17590.1	15512.6
Cops5	A_51_P140731	17062.6	30785	22340.4	17062.6	25455.7	25652	24061	30209	24004.4	25948.6	27356.1	21913.1	22129	27742.8	25879.1	23274	24191.7	25393.9	23843.7	19459.5	28463.5	22373.1	18109.6	20774.6	19848.6
Cops6	A_55_P2128373	18286.1	27124.5	25671.4	18286.1	29354.2	28864.5	25615.5	35579.5	29622.4	32445.6	34662.6	26340.1	28023	27507.8	30407.6	26074	25624.2	27059.9	26114.7	25566	28724	22746.6	18942.1	24824.6	23781.1
Cops6	A_55_P1969042	14719.6	24963	22217.4	14719.6	25523.7	24148.5	19890	30849	22842.4	27577.1	30152.6	21116.1	23336	24010.8	25020.1	21761	22133.2	22556.9	22806.7	19528	24115	20937.1	15725.1	19219.6	18183.6
Coro1c	A_66_P115453	25670.5	42002.5	47220.9	26994.6	37110.7	34705.5	31494.5	69929	46610.4	58226.6	52224.1	36370.6	39325	60036.3	52352.1	39374	38279.7	28620.9	31517.2	25670.5	62112.5	43374.1	26967.1	43602.6	41470.1
COX1	A_66_P101646	125847	218776	182979	192987	146176	125847	147097	201570	190965	136746	171466	204653	138962	272583	211603	126371	168286	204254	186785	218090	210102	214140	184608	209365	212787
COX2	A_51_P323880	174263	196932	185308	193579	192813	188894	174263	208142	198013	203782	211409	204006	185870	229149	195630	198366	188084	196642	177772	195809	201404	197789	177457	213133	198527
COX3	A_65_P07196	89130.5	126055	101054	93518.6	98599.7	96542.5	89130.5	123475	108721	109833	125664	121267	109854	134213	98931.1	102517	100638	130182	110968	135783	112485	114597	103913	110105	125043
Cox4i1	A_51_P165435	56965.1	95672	80813.9	56965.1	81812.2	77753	65140	98875	77891.4	94187.6	108371	71087.6	86295	79667.8	94604.1	78760.5	75272.7	90921.4	91618.7	91184	95359.5	94038.1	78802.6	92585.6	81515.1
Cox5a	A_51_P335900	41261.1	79730	59529.9	41261.1	56155.7	58568.5	56430.5	73861.5	48718.4	54164.6	69386.6	54904.1	53078.5	84263.3	59452.1	62615	68543.7	47240.4	45320.2	43734	75046	54531.6	43575.6	62609.1	66217.1
Cox5b	A_55_P2131068	17834.6	31458	22511.9	19844.1	22243.7	20847.5	20016.5	27824	24843.4	23871.6	29566.6	23999.1	23791	26098.8	30575.1	24638	26144.7	24146.9	22483.7	28591	29799.5	22426.1	17834.6	27087.1	27547.1
Cox5b	A_55_P2017804	16209.6	31152.5	20632.9	20939.1	22037.7	19842.5	20718.5	25758.5	26757.4	22675.6	28650.6	25786.1	21643.5	28363.8	30126.1	23813	23620.7	23658.9	20383.7	30984	28747.5	22218.1	16209.6	27759.6	29574.1
Cox6a1	A_51_P311540	187815	282419	228180	192052	206831	207306	187815	251397	203095	221596	244057	221892	209491	218516	196001	238616	245685	235587	233572	243891	212512	203244	198778	221566	217420
Cox6c	A_51_P343323	32357.7	46754.5	37589.9	41538.1	42694.7	45072	46265.5	41410	53054.4	35565.6	40505.1	49230.1	36510	55539.3	37561.6	37974.5	37276.7	48521.9	32357.7	48964.5	39071	37317.1	39840.1	55022.6	51282.1
Cox7a2	A_52_P37894	14985.6	31195.5	20587.4	17978.6	23641.2	23602.5	20870.5	26684	21057.4	20836.6	27260.6	22255.1	20253	26854.8	26199.6	21370	26311.7	25731.4	20072.7	20217	26392.5	17184.1	14985.6	19384.1	22898.1
Cox7a2l	A_55_P2151071	46611.1	62523	53233.9	46611.1	61154.2	62530	54530.5	72467.5	66933.4	60704.6	74896.6	72282.1	69744.5	56119.3	50207.1	57096	59120.7	81330.4	75700.7	70972.5	57985.5	74489.1	75391.6	85302.1	66475.1
Cox7a2l	A_66_P129419	29908.1	40402	34771.9	29908.1	41562.7	38650	39972.5	42549	44340.4	39590.1	49173.1	45450.1	43990	39253.8	32643.1	35931	36018.7	50207.9	46362.2	51006	37534.5	48340.1	48577.1	55511.6	47424.1
Cox7b	A_51_P160664	30412.6	55444.5	36249.9	38703.6	34059.7	36398	33615.5	42628.5	37466.4	39787.6	46431.1	41391.1	39389.5	43787.3	49939.1	32902	38171.7	51956.9	36303.7	37783	46433.5	35555.1	30412.6	30562.6	34812.6
Cox8a	A_51_P517495	96921.1	126169	104740	96921.1	103035	103507	99134	128450	134876	112788	130582	121321	98328	121171	124158	108673	119526	117154	113202	128318	114438	99211.6	101547	128593	125567
Creb5	A_55_P2097474	17504.1	26038	27321.9	17504.1	38223.2	40483.5	56165.5	31282.5	48523.4	23828.6	30572.1	55366.6	30280	66975.3	30146.1	25617	28628.7	41187.9	45212.7	64409.5	39045	27331.1	22243.6	74151.6	41419.1
Creld2	A_51_P122246	12924.1	18503	18704.2	13720.6	25998.3	26714.5	24362.8	29139.7	28075.1	24208.2	28772.4	19935.4	20269.5	25918.9	27492.9	24304.1	24896.5	20383.3	24577.5	23020.1	42532.1	14971.1	12924.1	23257.9	25053.9
Crip1	A_55_P2163774	36171.8	72171.5	61524.9	68716.1	66421.7	55906.5	52196.5	57930.5	69161.4	92922.6	77777.6	75319.6	52091	36171.8	63850.6	65762	64948.7	36858.9	38844.2	39966	70699	42835.6	62419.6	68772.6	62269.1
Crip2	A_51_P314397	41335.6	151850	132996	71908.1	129888	125497	127095	52048	101498	137020	72110.1	53465.6	59245.5	74991.3	65723.1	63081	63697.2	103311	121966	104013	89199.5	77542.1	79995.6	41335.6	49774.1
Crtap	A_51_P201721	14190.1	22812	23146.4	19272.1	28914.2	26994	29436.5	31069	33074.9	36241.6	30653.1	24912.6	24845.5	16077.3	14190.1	25541	25136.7	42513.9	41722.7	41199	18839.5	34049.1	41472.1	29659.1	25242.1
Cs	A_52_P182659	35828	62508	53099.4	36045.6	47350.2	46514.5	40139	67382.5	53429.9	49438.6	62035.1	47058.1	50073	59873.3	60349.1	53565.5	54607.7	40803.9	45370.7	35828	74856	51793.1	37508.6	50927.1	54368.1
Csf1	A_51_P195506	34900.7	74986	77774.7	57609.5	54914.3	60047	58395	95105.2	62548.7	92369.2	88379	65950	74562.2	34900.7	68874.1	78955.6	76398.2	102657	129841	94195	76157.5	57510.3	40632.6	38896.3	51645.6
Csf3r	A_55_P2070352	21744.7	34363	39287.9	39401.1	22439.7	31666.5	35405.5	35186	34290.4	27197.6	44993.1	44324.1	42849.5	62111.8	25957.6	27584.5	21744.7	32390.9	35232.7	24797.5	57094.5	62516.1	52296.6	38715.6	43166.1
Csnk1d	A_55_P1970229	18033.1	35445	37719.9	18033.1	36418.7	33997.5	37269.5	44321.5	38642.4	34019.1	45034.1	35773.6	38059	39855.8	34144.1	35790	35835.7	46635.4	44368.2	39385	48195.5	41323.6	33295.1	35779.6	34914.1
Csnk2b	A_51_P373379	25829.6	39395.5	35524.9	25829.6	32881.2	32730	30661.5	46907.5	38003.4	38574.1	40923.1	34934.1	31650.5	49372.8	50486.1	34177	37693.2	32639.9	29561.7	31640	46276.5	30878.6	26363.6	35717.6	39450.6
Csrp1	A_55_P2038007	149436	267088	242377	245644	150169	157642	149436	261621	239915	226372	262857	232353	239917	246507	212181	191664	180087	163229	164868	159681	219395	252631	212749	179286	181986
Cstb	A_51_P114910	13497.6	26040.5	17290.9	14838.6	20516.7	21260.5	18836	25514	17900.4	22328.6	26074.1	20488.1	20498.5	27460.8	26325.1	14430	16722.7	17637.9	17837.2	16344.5	26390	19103.6	13497.6	18411.1	19150.1
Ctbp1	A_55_P2052959	25271.1	36315.5	35998.4	25271.1	37566.7	34187	39340.5	42249.5	51367.4	31823.1	43159.1	38378.6	39534	43387.8	30351.6	39756	37247.2	34546.9	38309.7	42867	44917.5	38503.6	32166.1	46105.1	40323.1
Ctgf	A_51_P157042	107081	188940	173166	133256	158124	162775	159560	191072	143634	207834	170120	128897	144330	204729	198178	173238	163007	123880	148781	137077	211936	159761	107081	114465	161586
Ctnnd1	A_55_P1953252	10802	24302	23342.4	15982.6	17025.7	15669.5	15542.5	18850	16527.4	22728.6	18508.6	12142.6	14546	28687.8	21016.6	14024	13794.7	14085.4	13725.7	10802	24888.5	17700.1	15006.6	14076.1	14851.1
Ctps	A_51_P251357	14120.6	25573	24456.4	15139.1	21886.7	22125.5	25052.5	31891.5	28049.4	19880.1	30834.6	20612.6	18410	24978.8	21822.1	27123	25847.7	14873.9	15785.7	14705	30268.5	19311.1	14120.6	28855.1	26965.1
Ctsb	A_51_P465148	17402	22897	19659.9	18596.1	20789.7	17446.5	19282.5	43666	42856.4	23550.6	41482.1	38089.6	33125	27114.8	25739.1	17402	18271.7	31160.4	34738.7	36236	30728	39938.1	32794.6	54550.6	36614.1
Ctsl	A_51_P253547	28560.1	46779	38425.9	28560.1	70948.7	64033	63292	71218	54422.4	44759.6	66654.1	62281.1	59302.5	68344.8	40330.1	57777	56629.2	68634.9	63537.7	70858	54894.5	76522.1	52975.1	121045	84044.1
Ctsz	A_51_P256202	15877.6	21883	19836.9	15877.6	36291.2	31598.5	26653.5	32649.5	27551.4	26155.6	29474.1	24910.6	23143.5	20423.3	21412.1	20617.5	21703.2	37479.9	38533.7	36660	20827	30441.1	26557.6	42609.1	27602.1
Cttn	A_55_P2037677	12553.1	21469.5	17701.4	12553.1	16692.7	15520.5	15526.5	20534.5	16451.9	17914.1	20172.1	17697.1	19876	23211.8	18188.1	14605	14446.7	16270.9	21103.2	15863	23813.5	22746.6	15684.6	16167.1	17220.1
Cuedc2	A_51_P403334	10222.5	18888.5	13816.9	12256.1	11478.2	10222.5	10386.5	19602	18020.4	15556.1	19119.6	17711.1	15536	19556.8	18082.1	12046	11850.7	14442.9	14611.7	17635.5	18281.5	16058.1	11628.1	18595.6	16932.1
Cxcl11	A_55_P2160387	150918	177864	171939	183020	160922	172193	163571	185126	174430	174007	194519	198878	171761	209690	167175	172481	150918	193792	176151	169965	190310	194706	178305	188408	184905
Cxx1b	A_55_P1980262	12326.3	31041	24192.9	18482.6	18388.7	18362.5	16105.5	22038.5	21453.9	29933.6	25202.6	20190.6	20527	12326.3	13861.1	14772	16324.7	31072.9	28823.2	25350	13732	21033.1	23765.6	16694.6	13808.1
Cxx1c	A_55_P2133266	12531.5	28267	22341.9	19278.1	18292.7	15884.5	18700	19098	22851.4	28538.6	22675.1	22668.6	19733	15324.3	13989.1	13559.5	14618.7	27825.4	27272.7	29782	12531.5	20665.1	21994.6	19645.6	14001.6
Cyb5	A_66_P125722	26253.1	36069	33592.4	28065.1	57424.7	54677.5	46256	40336.5	46570.9	46784.1	48437.1	41955.6	41355	32968.3	28045.1	35174	32583.7	61191.9	49729.2	53790.5	34186	54810.6	40433.6	26803.6	26253.1
Cyba	A_55_P1979341	21076.7	44417	37266.9	32141.6	30910.7	31359.5	27667.5	46541.5	36389.4	45942.1	40762.1	32255.1	37261	39226.8	46084.6	21575	21076.7	23544.9	24938.7	24550	37504.5	45800.6	44532.6	32931.6	28724.1
Cyp2u1	A_55_P1966734	13519.6	22011	23281.9	13519.6	34420.7	35778.5	46968.5	27609	38857.4	19747.6	25312.1	44456.6	26087	56495.3	25124.1	21904	23294.7	36268.9	35994.7	56253	33150.5	23870.1	19133.6	60749.6	35048.1
Cyr61	A_51_P252859	36105.7	59588	47940.9	38077.1	46103.7	42245	42753.5	47646	42996.4	58183.6	58752.1	36135.1	47356	41572.8	51875.1	41492	36105.7	69076.9	90177.7	64614	50647.5	46153.1	42024.6	46956.1	39750.1
D19Wsu162e	A_55_P2136957	15978.1	22044.5	24879.9	15978.1	28433.7	28322.5	25440.5	32433.5	35490.4	24735.1	34642.1	28518.1	29020	28463.3	19329.6	21349	19685.7	27171.9	25625.2	24936	25381.5	35150.1	32250.6	34708.6	30751.1
Dab2ip	A_55_P1977468	10487.2	19442	20628.9	17702.6	13977.2	13839	15273.5	16757.5	18434.9	20456.6	15076.1	13565.6	14097	19872.8	14393.1	13083	10487.2	11173.9	13286.2	13386	17201.5	20668.6	23411.6	19655.6	16965.6
Dad1	A_51_P189905	27923	52137	36619.9	30787.1	31968.2	30362.5	29190.5	39985	37485.4	46293.6	40062.1	29403.1	27923	38488.8	46458.6	36822	38719.7	36976.9	37457.7	36545	42836.5	34872.1	28899.6	35874.6	39128.1
Dap3	A_55_P1975743	14534.1	23594	19405.9	14534.1	21160.2	19482.5	19286.5	26035	24632.4	21958.6	25936.1	20476.1	20994	22548.8	21094.1	24576.5	25905.2	24895.4	24645.7	24474	23465	19725.1	15278.6	30480.6	26098.1
Dazap2	A_55_P2136378	13772.1	23358.5	22721.4	13772.1	27100.7	26363	25018.5	24772	29504.9	21528.1	25544.6	26204.1	23391	39816.8	27684.1	21445	22331.7	31672.9	31049.2	31877	27832.5	29899.6	26031.6	31092.1	25946.1
Dbi	A_55_P2116924	33003.6	67636	55440.9	43623.1	57909.7	64440.5	55124.5	46690.5	40120.4	55210.6	63391.1	48219.1	53842	51115.8	57085.6	35220.5	36996.7	47835.9	41405.7	41315.5	48331	52596.1	56288.6	33003.6	41579.1
Dbi	A_55_P2049979	25121.6	53845.5	40519.4	28810.1	46739.7	45564	44042.5	34990	28246.9	42859.1	49227.6	37555.1	40390.5	38689.8	39178.1	27355	29948.2	38911.9	32985.7	33863	34453.5	37737.1	41845.1	25121.6	31435.1
Dcc	A_55_P1961761	10564.5	19023	28793.9	44063.1	17420.7	18873	18240.5	18590	23212.4	12879.6	24034.1	28739.1	33237	52988.8	50224.6	14077.5	11654.7	18443.9	18490.7	10564.5	46633	49423.6	38493.6	20757.1	15475.6
Dctn1	A_55_P1975385	19213.1	32664	29901.9	19213.1	29541.7	27125	24856	36820	32249.4	32389.6	40918.1	28581.1	33509	26629.8	19216.1	28753	26267.7	31162.9	37701.7	35164	31528	38451.6	29212.6	29732.1	27119.1
Dctn3	A_51_P298178	19058.6	25338.5	23911.9	19058.6	23384.7	23550	22529.5	30890.5	26039.4	22257.1	29483.1	23945.1	23909	31962.8	23950.6	22294.5	22196.7	22808.9	24213.7	26221	30431	22777.1	20975.6	30953.6	30832.1
Dctn6	A_55_P2001228	10619.5	25940.5	18055.4	12295.1	12822.7	11295.5	10619.5	19479.5	15072.4	20461.6	25366.6	19418.1	20268	12751.3	14016.6	13399.5	12434.7	15436.4	16975.2	16139.5	18074.5	20993.6	14683.6	13498.6	12629.1
Ddb1	A_55_P1989901	91514.6	113982	108694	91514.6	106565	116290	111088	138958	128357	108290	118216	119175	108850	120411	95476.1	110967	109397	92257.9	98770.7	95044	116088	108227	101092	123254	116254
Ddit4	A_51_P245796	16458.5	31100	31383.4	21470.1	28513.7	22726	35016.5	25420.5	29383.4	16738.6	20692.1	25359.6	16458.5	60091.8	43326.1	36980	33645.2	22693.9	22522.7	24390	42140.5	30555.6	36122.6	94839.1	36052.6
Ddost	A_51_P216075	11991.5	15445	13732.9	12350.1	19614.7	15659	11991.5	21998.5	16435.4	22566.6	24064.1	14760.1	17862	16026.8	19044.1	17216.5	16814.7	19851.9	22703.7	20700.5	16071.5	20026.1	15293.1	20315.1	15471.1
Ddx17	A_51_P381321	23796.1	33439.5	34885.4	23796.1	31255.7	34291.5	32054.5	41936.5	35795.4	35512.1	38642.1	37936.1	41699	42765.8	31825.1	28304.5	26595.7	39429.4	40436.7	32570.5	40496.5	48677.1	47439.1	40028.6	37964.1
Ddx24	A_55_P1958007	14865.1	21394.5	20862.4	14865.1	34435.7	34197.5	30548	25379	21000.4	17639.1	23793.1	19965.1	16443.5	23463.3	17580.6	23019	22778.7	26988.9	22456.7	23742.5	25314.5	22371.1	20501.1	24796.6	21492.1
Decr1	A_55_P2159189	16435.6	24236	19259.9	17749.1	24139.7	25462.5	25564.5	27305	23698.4	20730.1	26424.6	26365.1	23541	25185.8	16435.6	16806	17953.7	21612.4	19289.2	25380.5	21388.5	23088.1	17190.1	28031.6	24539.1
Degs1	A_51_P498890	15261.6	22518.5	20068.9	15749.1	19951.7	20511	19561.5	26410.5	25141.4	23255.6	25486.1	20495.1	19935.5	19217.3	18204.6	19478	20115.2	16129.4	18599.7	18032	21852.5	20816.1	15261.6	19884.1	20334.1
Dennd5a	A_55_P2005440	10479.1	14475	16974.9	10993.1	14282.7	13988.5	10825.5	17846	14604.9	13104.6	15289.1	13179.1	13725	12254.8	12429.1	10940	10633.7	12727.4	11569.7	11505.5	15167.5	16156.1	14800.1	15220.6	10479.1
Derl2	A_51_P498831	13815.6	24508.5	18749.4	13815.6	22947.7	23389	22137.5	25477	20614.4	23369.1	27165.1	22045.1	22476.5	23628.8	21721.1	20872	21837.7	23678.9	24311.7	24579	27955.5	22841.1	15969.6	21034.1	24680.1
Dmwd	A_55_P2013414	11725.6	24320	20943.4	11725.6	18205.7	18281.5	16225.5	29850	18599.4	24637.6	28184.1	18380.6	23480	18481.8	21095.1	17682.5	18967.7	14433.9	20390.2	17047.5	29628.5	21982.6	16801.6	15300.1	19262.1
Dnaja1	A_55_P2087984	19501.1	42800	35229.9	19501.1	42340.7	39368.5	37018	49559	38888.4	33621.6	55914.1	47812.6	47914	49635.8	41348.1	36078	35447.7	35736.4	33507.2	30336	63542	42871.1	31938.6	40924.6	37946.1
Dnajb1	A_51_P153486	12357.1	26337	21051.9	12732.1	19048.7	18241.5	14012.5	21677.5	14822.4	16717.6	22322.6	18406.1	19724.5	18234.8	12357.1	19520.5	18777.7	25096.9	23875.2	19411	20500.5	20823.1	21624.6	14489.6	14873.6
Dnajc5	A_55_P1982737	34552.2	43491	48494.4	62050.1	34552.2	40940.5	53289.5	47844	58678.4	36103.6	53411.1	71349.1	50639	91881.3	44576.1	39541	34618.7	47511.9	44645.7	46366	64089	65114.6	56613.6	60935.6	62039.1
Dnm2	A_55_P2001203	19007.1	25778.5	24208.9	19007.1	26277.2	24959.5	24043	33351.5	29285.4	29276.1	32731.6	24203.1	25259	25018.3	21796.6	25914	27150.7	26909.9	29568.2	27717	26505	28708.1	23621.6	35972.1	32662.1
Dnpep	A_55_P1959263	32288.1	59075.5	39502.9	32288.1	59609.7	53481.5	53243.5	52476	48280.9	38429.6	54881.1	47418.1	42856	51954.8	39088.1	39846	44068.2	50124.4	56600.2	60236	54798.5	52445.1	39141.6	44927.6	47081.1
Dos	A_55_P2123101	15843.1	26787	20323.9	15843.1	24598.7	22685.5	21947	26886	23246.9	27376.6	33662.1	22881.1	24700.5	27508.3	23771.1	26602.5	23728.2	25347.4	22789.7	33621	25827.5	24498.1	19906.6	35661.1	33098.6
Dpm3	A_55_P2010768	10870.1	20127	13883.9	10870.1	14947.7	15012.5	13081.5	17365	14253.4	16069.6	18142.1	15945.1	15497	13114.8	15972.6	15386.5	17141.7	23761.9	20321.7	20234	16194	17138.6	14876.6	15174.1	13922.1
Drap1	A_55_P1982096	22814.6	34871.5	27319.4	23895.1	26642.2	25746.5	25072.5	29764	27865.4	31102.6	32475.6	26590.1	28018.5	27519.3	28102.1	27343	26511.7	34526.9	32532.7	38283.5	27230.5	30280.1	22814.6	23776.6	22984.1
Dync1h1	A_51_P354698	13985.6	20953	23813.9	13985.6	21590.7	21333.5	25229.5	28716	27458.4	27552.6	25004.1	19814.1	19786	26240.8	20719.6	21880.5	19017.2	18637.4	16541.7	15841.5	29650.5	25932.6	23019.6	35680.1	27764.1
Dync1i2	A_55_P1992739	27407.2	49107	44619.9	28949.1	33513.7	33340.5	30534.5	40281	37223.9	36017.1	44933.1	34962.1	34595	51632.8	48065.6	29782	27407.2	40824.9	40256.7	36683	50348	37997.6	34332.6	37042.1	29661.6
Dynlt1c	A_55_P2151143	18252.1	38232	24968.9	22398.6	23141.2	21368.5	23646.5	28234	23604.4	21471.6	26650.1	24425.1	21169.5	38048.3	22390.1	23438	23941.2	26867.9	20145.2	23678	30779.5	22223.1	18252.1	22290.6	26836.1
Dynlt1e	A_55_P2151138	18082.1	45972	31900.9	18082.1	26649.2	27380.5	18942	37560.5	22070.9	34178.6	35328.1	21822.6	28887	38029.8	34531.1	29133	29818.7	31864.9	28939.7	24665.5	40788	29188.1	24142.6	19387.6	23747.1
Ebp	A_51_P429682	12870.6	19931.5	15164.9	12870.6	18980.7	17278.5	17812.5	19991	18224.4	15748.6	22773.1	19134.6	19288	26546.8	19496.1	25647	25064.7	20090.9	17285.2	21868.5	20601.5	19114.1	15319.6	32519.6	31135.1
Edf1	A_55_P2007535	53719.6	87713	73622.9	69331.1	79262.7	76180	74496.5	90981	101321	98395.6	93078.1	77779.1	75214.5	83250.8	85113.1	73268	75185.7	63611.9	70527.7	77729	79502	65660.6	53719.6	71580.1	65406.6
Edf1	A_55_P1992388	33596.6	60208	49513.4	51676.6	54293.7	48433.5	54307.5	62025	77677.9	65294.1	64297.1	59318.1	49303	62492.3	57187.6	46790.5	48650.7	43393.9	46862.2	57320.5	51948.5	43861.6	33596.6	56296.1	48045.6
Eef1a1	A_51_P118765	68230.1	82103	70725.9	91461.6	78731.7	78242.5	90471.5	89172	102170	82180.1	90523.1	102836	76157	109246	87370.1	79120	70703.7	87717.9	76968.7	97451.5	82411.5	83833.1	68230.1	109799	100906
Eef1a1	A_55_P2008692	20900.6	29874	23084.9	56896.1	26587.2	23153.5	64118.5	30623.5	80276.9	29409.1	35147.1	68773.1	27437	72029.8	28208.1	25784	21084.7	32744.9	26894.7	66966	29569.5	29895.1	20900.6	88023.6	70397.1
Eef1b2	A_51_P412595	70641.1	121634	90135.9	70641.1	103529	103509	99472	120581	98999.4	103209	133544	111774	114104	115857	111307	114834	110743	121676	111339	114926	127348	104008	79437.6	124713	118585
Eef1d	A_55_P1994648	52106.1	77691	64652.9	52106.1	80581.7	79400.5	66738.5	96554	79590.4	81748.1	93529.6	81451.6	70976	77702.8	102624	99902	104571	70425.9	65970.7	64267	90283	61346.1	54553.1	72391.6	69550.6
Eef1g	A_55_P2119802	113160	145058	142738	115765	175879	162344	177825	178953	175765	148619	179233	178574	153920	202839	146823	175623	163234	152849	135465	154237	167429	143274	113160	177057	181099
Eef1g	A_55_P2085157	16127.1	41540	36876.9	16127.1	51685.7	48622.5	50757.5	58522.5	47863.9	48250.6	59862.1	45229.6	44271	49512.8	37712.6	52203.5	51661.7	38665.4	34613.2	36494	51027.5	30919.1	24043.6	51056.1	54236.1
Eef2	A_66_P106191	78012.1	121410	116973	78012.1	140634	126024	129043	169861	166782	157772	183396	148125	153166	142647	127724	145462	127663	148965	145609	147054	149014	142144	132514	162395	149236
Egln2	A_55_P1960924	11557.1	22816	20532.9	11557.1	27724.7	25071.5	23260.5	28909	26840.4	20572.1	30170.1	28291.1	26291	24943.8	19187.6	24889	25847.7	27304.9	26761.7	28516.5	22977.5	23960.6	19596.6	28512.6	22977.1
Ehbp1l1	A_51_P222475	13959.1	28397	28105.9	13959.1	19365.7	19610	15807	44189	26064.4	36162.1	39841.6	23949.1	31989	24608.3	28270.1	32205	29806.7	19911.9	22020.7	16140	37182	25626.6	18231.6	25000.6	29834.1
Ehd1	A_51_P469008	28832.6	50331	47620.9	29523.6	36495.2	30693.5	29087.5	58240	46734.4	59692.6	49263.1	40917.1	39211	54710.8	60942.1	46974.5	52307.2	30412.9	34228.7	32534.5	56497	44830.1	28832.6	35880.6	42445.1
Ehmt2	A_55_P2001143	23397.1	35370.5	39519.4	23397.1	44660.7	40140.5	45378.5	50181.5	47650.4	41754.1	51090.1	45999.1	44092	44467.8	34233.1	33613	31488.7	44457.9	45900.7	39307	47065.5	40867.1	42455.6	50731.6	40274.1
Eif1	A_66_P126425	42705.1	59634.5	50479.9	44067.1	51838.2	47151.5	51392	81969	68541.4	60059.1	73208.6	58814.6	54352.5	93279.3	79098.1	68087	71455.7	58355.4	57106.2	53737.5	83327	55739.1	42705.1	78954.1	73458.1
Eif1ax	A_51_P237514	12670.6	26053	18485.4	15246.1	16512.7	18831.5	17243.5	23619.5	20435.4	19198.1	22416.1	19147.6	20610	22650.8	17257.1	21905.5	20869.7	21700.9	18486.7	17275	22759.5	17024.1	12670.6	16217.1	18104.1
Eif2b2	A_51_P229816	13120.1	27472	21624.4	13120.1	18783.7	17771.5	14542.5	31246.5	20133.4	18258.6	25388.1	16193.1	19155	27139.8	22172.6	22971	23400.2	16573.9	21681.7	19108	35206.5	23339.1	15127.6	20553.6	25658.1
Eif2s2	A_55_P2089655	25668.6	48724	38657.9	27746.1	35336.7	31904.5	32156	64147	36105.4	41091.6	42111.1	39697.1	39586	61908.8	49883.1	49830.5	46986.7	38693.9	30560.7	32339	51901	44402.1	25668.6	40420.6	47791.1
Eif3c	A_55_P2016351	35849.1	59172.5	50537.4	35849.1	56853.7	59535.5	55138.5	102671	77251.4	72550.6	84447.1	71662.1	70194.5	85193.3	61872.1	80853.5	84904.7	65147.9	62999.2	62906	73325.5	62550.6	40928.6	74296.6	76730.1
Eif3c	A_52_P18807	12217.6	19657	16755.4	28088.6	18781.7	22032.5	18181.5	35445.5	37919.4	23669.6	26194.1	28559.6	27147.5	28398.8	41437.1	33645.5	37168.7	23483.4	20534.2	25316	34271.5	19977.1	12217.6	41966.1	37620.1
Eif3d	A_55_P2016346	33615.1	50474	45157.9	33615.1	50517.7	51247	48180.5	71570.5	47996.4	49854.1	61386.1	51592.1	48756	63205.3	52947.1	59130	66271.7	47725.9	51750.7	52446.5	70660	44000.1	33867.6	49974.1	55382.6
Eif3g	A_51_P489229	28540.1	52418.5	38924.4	28540.1	41748.7	37801	32499	70350	39637.4	48977.1	59593.1	45080.1	46195.5	59009.3	64025.1	58374	61750.2	45158.4	47479.7	44577	71129.5	45033.1	30183.6	41959.1	50625.1
Eif3k	A_55_P2016387	47424.6	71766	62399.4	47424.6	68340.2	69708	63611.5	79202	72334.4	65692.1	83070.1	70158.1	72352	79243.8	74222.1	71335.5	80499.7	79377.9	81707.2	94281	81662.5	66470.1	55824.1	80511.1	78725.1
Eif3k	A_55_P2016388	29721.6	53919	39995.4	29721.6	46679.7	43587	32692	54690.5	43579.9	44602.1	56908.1	43880.1	47039	48947.3	49325.1	46792.5	50726.7	55260.9	56202.7	54216	54153.5	45324.1	33532.6	49823.6	46400.6
Eif3l	A_51_P173086	28918.6	55781	41078.4	28918.6	47710.2	45967.5	44851.5	59241.5	46393.9	37383.6	51655.1	45699.1	46119.5	62971.8	50202.1	55289	55991.7	45637.9	44073.7	45844	62107.5	43192.6	33106.6	44852.1	51326.1
Eif3m	A_55_P1979605	11371.5	16462	13013.4	12332.1	12559.7	11371.5	15578	17301	15927.4	12748.1	15723.1	14499.1	14136	20857.8	13317.1	13236	13286.7	16013.9	14761.7	19716.5	17620	16438.1	11740.1	15097.6	16101.1
Eif4a1	A_55_P2046398	26689.6	53712	42887.4	43459.1	45256.7	42988.5	50320.5	64670.5	55538.4	43096.6	55644.6	49714.1	40706	91556.8	66902.6	63634	63022.7	43481.4	43498.7	52631	75043.5	41702.6	26689.6	57472.6	65062.1
Eif4e2	A_55_P2006554	11069.1	19388.5	15513.9	12265.6	16063.7	15157.5	14402.5	25550	16683.9	19743.6	21072.6	15617.6	15764	23551.8	22163.1	17500	19919.7	15753.9	17757.7	18797	22562	15717.1	11069.1	18244.6	20640.1
Eif4ebp1	A_51_P330428	18554.1	34427	28286.4	24100.1	29682.7	26793.5	21229	71851.5	40010.4	47241.6	53416.1	36300.1	41755	29568.8	36986.1	42577	47999.7	21839.9	27384.2	29483.5	36896.5	42837.1	18554.1	42285.6	44388.6
Eif4g1	A_55_P2046378	18986	30490	30065.4	21400.6	34215.7	32289.5	26654	41115	31669.4	42096.6	37561.1	26328.1	27345	30735.3	30295.1	34578	33778.7	19918.4	21797.7	18986	41282.5	25604.6	22119.6	28135.6	29251.1
Eif4h	A_55_P1974582	31135.1	44566.5	46272.9	31135.1	53447.2	51829.5	60834	70102	57720.9	50371.6	61901.1	52706.6	52566	69516.3	53260.1	59732	57902.7	48743.9	57683.2	60400	70064	49640.1	38392.6	59236.1	65076.1
Eif5a	A_55_P2045066	10980.1	29872	23908.9	10980.1	26630.2	24983	26128.5	37795	28085.9	36144.6	33411.6	22603.1	24703	34061.8	46626.1	37268.5	37609.7	20953.4	23303.7	19127	47320.5	21571.1	14536.6	27456.1	32004.1
Elk1	A_55_P1954986	275173	321185	312818	308161	286543	314026	284707	325221	299693	309842	352217	332413	321012	350389	299101	311298	275173	346933	318344	285421	343054	347115	334296	317340	303551
Elof1	A_51_P158772	15447.1	24581.5	20057.9	15447.1	23876.2	22184.5	19585.5	25992	21532.4	20752.1	25990.1	22640.1	22694.5	32663.8	27097.1	23661	27481.7	22251.9	19387.2	22298	28079.5	20866.6	17251.6	19598.6	21125.1
Elovl1	A_55_P2151273	38684.6	70062	61945.9	38684.6	76531.2	75982.5	70843.5	83175	68342.9	67191.1	82117.1	68235.1	69870	65116.8	59179.1	74177	77363.7	78651.9	98589.7	91705	82177.5	69890.1	55311.6	71631.6	78370.1
Emp1	A_55_P1954221	28708.8	45318.5	55799.4	39637.1	109134	107012	101840	39861	45378.4	52570.6	56207.1	63490.6	69692	28708.8	42430.6	56329	53514.7	85401.9	89151.7	79471	40411	63694.6	34736.6	70077.1	59613.6
Eno1	A_55_P1958097	90646.5	164518	130226	111338	98699.7	90646.5	96568	152031	149895	153658	165309	130605	125697	138641	146126	128637	126897	103775	106058	117249	135738	127222	104730	160327	155373
Epn1	A_55_P2007733	29745.6	40334	45722.9	29745.6	49089.7	47346.5	45090.5	56105	49183.9	44897.6	53032.6	45095.6	53025	51430.8	42749.1	43338	45139.7	44942.9	55270.2	47788.5	51740.5	52543.6	42079.6	48843.6	52755.1
Erdr1	A_55_P2034481	12712.6	34614	29962.4	23248.6	31230.7	32907.5	23291	55565	29446.4	35002.1	48208.1	24262.1	27155	63826.8	54295.1	39569	44648.7	28171.9	30301.2	19149	48581.5	48785.6	12712.6	23379.1	53282.6
Erh	A_55_P1966124	30593.6	61478	46470.9	39140.1	42635.7	42976	44535.5	59842	50927.4	42887.6	58295.6	47380.1	43104.5	73773.3	64612.1	54634.5	58297.7	47397.9	37962.7	37300.5	76083.5	38714.1	30593.6	50542.6	50288.1
Erh	A_55_P1978311	20164.6	43357.5	29447.9	29250.1	29337.2	29283.5	31299.5	39936	37834.4	28506.1	38197.1	33586.1	30583	56678.8	48464.1	38665	39263.7	30165.9	24205.2	27951.5	48713.5	25605.1	20164.6	37785.1	38113.1
Erh	A_55_P2071389	10494.1	23511	16448.9	18235.1	17694.7	16784.5	21400	22050	25494.4	15700.1	21314.6	23319.1	15677	42862.8	26681.1	20102	21093.7	17589.9	13730.2	18338	28217.5	15288.6	10494.1	25971.1	26005.1
Erp29	A_55_P2049383	37666.1	64606.5	50025.9	37666.1	55195.7	52054.5	57426.5	69628.5	55954.9	60799.6	64334.1	49752.1	48799.5	56493.8	54856.1	54356	54902.2	44813.9	44974.2	46976	61797.5	55133.1	47089.6	58858.1	58826.1
Esd	A_55_P2006768	11356.6	21175	16996.9	23354.1	22902.7	20970.5	36514.5	30404	37270.4	16195.1	25162.1	39664.1	20456	56371.8	30058.1	34348	31369.7	14387.9	12795.7	25263	38562.5	20055.6	11356.6	39932.6	52684.1
Evl	A_55_P2135331	15015	20501	22631.9	18167.1	16252.2	15820.5	15015	28515.5	28625.4	19537.6	24374.1	18694.1	21014	28747.8	26173.1	26470	26839.7	18106.9	18943.2	20288	28002	17189.1	17361.6	33989.6	29202.1
Exosc2	A_55_P2034740	253014	273180	258486	263420	258690	267559	257547	306590	263058	275830	296558	274699	268423	301392	253014	268535	253353	264242	254332	253515	277882	280375	264618	283278	273707
Fabp5l2	A_55_P2150976	19302.6	100667	91963.9	72016.1	49159.7	53954.5	58313.5	48025	36771.4	19302.6	41410.6	34137.1	30470	38712.3	27115.6	51634	50029.7	55710.4	52242.7	57321	30251	29844.1	42831.6	36519.6	35602.1
Fam100b	A_55_P1995074	16862.6	21671.5	22183.9	16862.6	24078.7	23098	20277	29444	33754.4	18570.6	34541.6	25217.1	26585	41047.8	29669.1	30379	30687.7	21224.4	22851.7	21118.5	35679.5	26921.1	19197.6	38236.1	41989.1
Fam129b	A_55_P2140031	37856.6	62039.5	57761.4	40121.1	62720.2	53750	61537.5	61974	71867.9	64375.1	62795.6	53595.6	48216.5	75659.8	68655.6	67799	69458.7	55489.9	63290.7	66658.5	78387	65234.1	37856.6	50458.6	55201.6
Fam129b	A_55_P1989981	37190.6	58655	59117.9	38510.6	60001.2	53479.5	58543.5	58546.5	70677.4	65020.6	60572.1	50874.6	48652	76649.8	72654.6	66094	64955.7	54095.9	66148.2	64178.5	80417	64299.1	37190.6	49725.6	55541.1
Fam173a	A_51_P279127	10373.5	21273	16654.9	11196.6	16826.2	14567	12500.5	21536.5	16551.9	18089.6	24005.1	17851.1	20260	19837.8	16175.1	10373.5	10937.7	21921.4	22715.7	22629.5	17681.5	25510.1	21895.1	18436.6	15544.6
Fam176b	A_52_P678056	14025.1	24253	21103.9	16860.1	33651.7	31418.5	30644.5	22772	25326.4	27023.1	35951.1	32976.6	31828.5	18461.8	14025.1	23854	21155.7	20547.9	23770.2	26572.5	17602.5	32259.6	34396.6	30679.6	30163.1
Fam176b	A_55_P2087796	11119.1	20630	17132.9	13194.6	28620.7	25860.5	23561.5	18343	18884.4	22045.6	29637.1	25552.6	27809	14291.8	11119.1	18700	17594.2	16852.9	19162.2	19790	14552	26528.1	27213.6	24609.1	23431.1
Fam195b	A_55_P1985079	15158.1	22192	17295.4	15158.1	20269.7	19411.5	17393.5	25978	24266.4	25423.6	26409.1	24483.6	22534	16302.3	16767.1	18886	20758.7	26558.4	29131.7	29443	18950.5	22862.1	21209.6	29712.6	21680.1
Fam38a	A_55_P2150343	22470	37061.5	37286.4	23211.6	28802.7	25291.5	22470	56739	44539.4	48749.1	57466.1	38248.1	40365	42560.3	44357.6	37164	33899.2	32397.4	42789.2	36416.5	49144	39152.1	29864.6	36083.6	34026.6
Fam50a	A_55_P2078474	11665.6	13374	14972.9	11665.6	14006.7	14724	13759.5	20034	17858.9	15680.6	20796.1	19438.1	19162.5	20248.8	17217.1	14799.5	13745.7	18843.9	17710.7	18524	17234	17110.6	15325.6	21870.6	19552.1
Fam65a	A_55_P1955108	18784.5	32873	36721.9	19355.1	20171.2	20142.5	18784.5	33915.5	28216.4	34021.6	28635.1	22325.1	23703	24116.8	22595.6	20387	20933.7	31856.4	39014.7	28883	32717.5	40185.1	34443.6	19818.6	20772.1
Fat1	A_55_P2107502	20206.1	26117	27038.4	20852.1	27240.7	29881.5	34919.5	24290.5	24617.4	28844.1	24800.1	20206.1	21944.5	28241.8	23570.1	30267	25882.7	32615.4	32983.7	27425	31318	26256.1	23129.6	35004.6	26958.1
Fau	A_55_P2027225	210209	260283	210209	213073	256112	252464	227477	285231	252427	252426	298372	246204	263817	235173	271311	264624	276439	294080	265423	291040	275101	261624	228104	286912	271777
Fbln2	A_52_P590535	99909.6	119790	119638	108640	203450	191434	195237	204611	178688	227428	202826	173900	165903	107057	152078	173678	154433	131430	131708	144306	182729	176204	99909.6	194979	197107
Fcf1	A_55_P2001063	10441.6	15965	12643.9	10441.6	13064.7	14911.5	13865.5	19710	14085.4	13404.6	15421.6	15019.1	12897	23880.3	23678.1	17676	20251.7	18195.9	15340.7	16762	19412	12994.1	10974.6	18515.6	18576.6
Fdps	A_55_P1966804	12404.9	19247	12404.9	12425.1	18057.7	14178.5	16071.5	17116	15183.4	16769.6	25567.6	22590.1	20334.5	41339.3	27203.1	18099	18076.2	18363.4	18425.2	20304	26203.5	12575.1	15176.6	32317.1	30668.1
Fgfr1	A_55_P2057777	15930.6	22772	22564.4	17871.1	28444.2	24670.5	26728.5	22712	22887.9	15930.6	24246.6	22818.6	23662.5	33999.8	33220.6	38514.5	36885.7	22904.9	24081.7	23051.5	44984	32736.1	33222.6	61217.6	60945.1
Fis1	A_66_P126999	25393.6	43895.5	31911.4	25393.6	36266.7	35940.5	33915	40518.5	36555.9	41420.6	43398.1	38535.1	36924.5	36141.8	36369.1	31284	34498.7	44654.4	46353.2	49594.5	35043.5	33605.1	29702.6	32579.6	32172.6
Fkbp10	A_55_P2089530	76172.6	117202	104469	76172.6	114036	99962	94852.5	152590	116984	129595	135023	103449	106589	80120.3	78815.1	138374	128197	109580	131201	95254	117675	107082	76319.6	128288	124714
Fkbp1a	A_55_P2021921	45419.1	105847	100273	45419.1	101666	91290.5	88720	103927	112693	106555	121947	93767.1	100444	100171	83032.6	95051.5	84586.7	101757	89333.2	106800	112282	96618.1	87002.6	111777	104902
Fkbp1a	A_55_P1991134	29637.4	69016	57203.9	48052.1	37144.7	29992.5	34703	61486.5	66696.4	55529.6	53243.1	47486.6	41965.5	73157.8	62341.1	40270	39157.7	29637.4	38296.7	34492	66157	52303.1	30087.6	46844.6	53167.1
Fkbp8	A_55_P2003369	11286.5	16918	16160.4	12894.1	14186.7	12976.5	11286.5	19114	18889.9	21506.6	19482.1	14816.6	14129	13757.8	15808.1	11418	11663.7	15724.9	16223.7	15897	15368.5	15861.1	15931.6	18528.1	13269.1
Flna	A_55_P2001920	118594	203942	183343	160295	118594	126890	129204	213335	191229	215925	225551	178433	192989	188324	164166	179416	161121	134729	148337	140170	198695	203439	169344	179632	189448
Flnc	A_55_P1975400	11719.5	16364	17121.9	16035.1	12929.2	11719.5	12365.5	28458.5	24576.4	26054.1	26732.1	20430.6	20854	20173.8	24330.6	18348	17148.7	26346.9	26899.7	24287.5	25161.5	17473.1	12880.6	20785.6	20497.6
Fnta	A_55_P1990225	11749.5	20856.5	17786.9	12986.6	14209.7	14216	11749.5	18494	17442.4	17197.6	19886.6	17726.6	19044.5	15877.3	12013.1	13533	14733.7	25481.9	25971.7	22723	15085	19551.1	17184.6	16447.6	12469.1
Fstl1	A_55_P2143517	41361.1	134954	101288	95442.1	153143	153231	161596	126740	112241	128210	123446	118290	106017	53613.8	41361.1	128798	112416	160732	141804	139413	71174.5	143582	125080	158908	130822
Fth1	A_52_P49601	77583.6	139025	118935	96599.1	132328	123165	128242	166655	169935	139970	201006	169412	152930	115340	77583.6	151322	151175	224622	221182	220509	135340	193551	153680	146245	132757
Ftl1	A_55_P1968245	190081	220540	202279	220946	212264	207428	223450	236085	235107	223783	253009	245812	213578	260994	231515	228957	214693	226758	213258	232711	241507	220032	190081	252014	243086
Ftl2	A_55_P1983959	27200.1	59253	58871.9	27200.1	61510.7	60975.5	48256.5	82444	48601.4	70246.6	94081.6	60361.1	83652.5	86657.8	96688.1	85717	86017.7	67097.9	80854.7	70340.5	105017	64489.1	52669.6	67574.6	81101.1
Fus	A_55_P1964664	11918.1	18126.5	17800.9	11918.1	18200.2	18173.5	21214.5	24708.5	21087.4	21112.6	23689.1	21246.1	18155	31802.3	33330.1	23045.5	23601.7	18012.4	15081.7	12929.5	27547.5	14656.6	14311.6	19348.6	17818.1
Fxc1	A_51_P396854	11465.1	19529	16012.9	11465.1	22317.2	22028.5	18000.5	20841.5	17399.4	16466.6	20872.1	16094.6	16880	17762.8	18140.1	20541	23680.7	20014.9	19344.2	18239	22446.5	16026.1	12483.6	21071.1	19776.1
Gabarap	A_55_P2010223	25754.1	46934	34619.4	25754.1	43654.2	41605	45140	38347	43100.4	46054.6	49807.1	43629.1	42073	33479.3	32889.1	33327	34137.7	56778.4	50406.7	57223.5	30222.5	37812.6	38156.6	42235.1	38576.6
Gabarapl1	A_52_P633410	23713.1	37712.5	36814.4	23713.1	36737.7	35478.5	32073.5	68023.5	46639.4	34566.1	63856.1	58919.6	43804	38685.8	33088.1	40129	41639.2	51124.4	47003.7	50226	58674.5	59757.6	44434.6	45720.6	43787.1
Gadd45g	A_51_P315904	69510.6	127223	122527	107027	128867	128519	118855	122890	77692.9	109945	99051.6	69510.6	84524	109411	111352	123139	109137	124932	136273	141319	120404	112300	95166.6	119531	110514
Ganab	A_55_P2048209	14408.1	16275	15271.9	14408.1	18394.2	17594	19737.5	21654	24380.9	18975.6	19432.1	20846.6	16126	21423.8	15471.6	16870.5	16478.7	17554.9	17288.2	18466	18368.5	17105.1	15080.6	24495.6	23892.1
Ganab	A_55_P2048210	13229.1	15110	14947.9	13229.1	17376.7	17341	16979.5	21096	22220.9	19367.6	19929.1	18957.1	16088.5	17813.8	15768.1	16454	17078.7	16884.9	18473.7	17070.5	17385	16029.1	14943.1	24143.6	19983.1
Gapdh	A_55_P2097548	183236	255756	208392	219527	196464	199649	188795	239726	232359	232882	245822	218461	209529	236541	227007	214076	213791	187132	193933	212913	238553	215925	183236	241940	238936
Gapdh	A_55_P2186027	179612	245056	207945	215398	198764	198280	189980	249038	235229	229565	261316	219766	212144	246308	243375	224400	220734	185919	189040	206017	248168	213656	179612	250815	245735
Gapdh	A_55_P2081133	108628	216859	161575	142122	139080	127825	115756	216153	176187	189737	238705	152664	160038	193417	233996	174734	175949	112602	128669	140068	224023	159982	108628	200413	223483
Gapdh	A_55_P2037425	90902.1	199558	172587	90902.1	130592	120973	111030	221360	175982	187015	222713	130155	152061	180373	228094	163895	173689	109855	124150	94250	217452	151094	114729	169966	206847
Gapdh	A_55_P1984284	83177	176857	141967	100653	118635	112439	93746.5	195856	149086	163874	206985	116242	130295	154602	214290	155656	154581	93185.9	97814.7	83177	191058	126959	93605.1	157995	174051
Gapdh	A_55_P2088912	29807.6	93900	74029.9	29807.6	57693.7	51858.5	51718.5	94687	74312.4	83310.1	96248.1	55252.6	67162.5	82261.8	93351.6	72701	71058.7	46569.9	54623.7	40778	97440.5	67785.1	48115.6	72837.6	92688.1
Gapdh	A_55_P1965725	20173.6	74399	68239.9	20173.6	52350.7	47589.5	41256.5	84688	62392.9	74117.1	81997.1	51243.1	65485.5	78284.8	78909.6	64811	67371.7	43397.9	50395.2	32215	81761.5	61234.6	47274.1	54093.6	73244.1
Gars	A_66_P121369	74661.1	99902.5	99885.9	77460.1	111991	110347	103556	185997	136065	122778	136916	121654	113854	128383	110587	162251	165635	93725.4	94736.2	98763	143158	116311	74661.1	144461	157121
Gas2l1	A_55_P2027278	12049.9	17640	19417.9	13784.1	16988.2	15180	15843.5	19636.5	21558.4	18618.1	17948.6	15927.1	16742.5	24324.8	18551.1	17957.5	19921.7	12049.9	17360.7	15018.5	21355	19251.1	13908.6	16578.1	18298.1
Gcn1l1	A_55_P2169714	17456.1	24168	25822.9	17456.1	28467.7	28119.5	27065.5	38394	32051.4	27434.1	33441.1	25487.1	27867	46459.3	26404.1	29154.5	31211.7	24667.9	30365.7	25012	36501.5	30660.1	26197.6	31105.6	29510.1
Gcsh	A_66_P109800	12702	23073	21340.4	12925.1	16353.7	15178.5	15028.5	31481	18522.4	23357.6	21906.1	15657.6	17987	21504.3	27125.1	22252	22021.7	14889.4	16132.7	12702	29356.5	17604.1	13613.1	14569.6	16599.1
Gdi2	A_55_P2052210	31615.6	42099.5	36740.4	33136.1	38785.7	39454.5	36623.5	49032.5	43211.9	40355.6	49168.1	42048.6	41284.5	42375.3	39356.6	37458	37402.2	38146.9	36578.7	35878	47177.5	38674.6	31615.6	41536.1	40104.1
Ghitm	A_55_P2061381	11832.6	20405	17792.4	12196.6	18600.7	19166.5	20574.5	34374	21730.9	23069.1	25780.1	22474.1	21087	28455.3	19018.1	27148	25299.7	20124.9	19141.7	20719	34371.5	21923.1	11832.6	35960.6	42573.1
Gla	A_55_P2146136	41444.1	64588	62721.4	88449.1	42978.7	50536.5	83141.5	68869	93192.4	41444.1	67694.6	95679.1	56480	128684	64687.1	53919.5	46740.7	46328.4	42549.7	53240	97089.5	67271.1	55717.1	94419.6	100999
Glg1	A_51_P260548	13897.1	19628	22176.9	14697.6	25334.2	24383.5	22137.5	27904	26588.4	27551.6	29959.1	21705.1	26182	18209.3	13897.1	27020	23963.7	28605.9	28359.7	25881.5	22546.5	27106.1	25827.6	32809.6	27793.6
Glrx3	A_55_P2158030	23916.1	48842	38397.4	23916.1	37789.7	37571.5	29989.5	46874	29288.9	33045.1	40086.1	31528.1	33736	36651.8	33922.1	32083	28592.2	43598.9	41512.7	34412	45132	37815.1	28930.6	25257.6	27102.6
Glrx3	A_55_P2016604	22242.1	39605.5	34839.9	22242.1	35517.7	33758	27716.5	44286	28348.4	32389.6	36314.1	28784.1	31165	33681.8	30579.1	30452.5	26356.7	39260.9	37075.7	32366	40091.5	34565.6	27167.1	23796.1	24895.6
Gm10063	A_55_P2069955	202189	265609	215842	215204	227342	237862	245434	255632	246375	226413	285169	254126	245256	269215	243689	242170	228950	263634	207202	247128	271941	237010	202189	243698	246309
Gm10063	A_55_P2069961	74798.1	113238	81190.9	97682.1	92728.2	100149	109103	107108	109009	93589.6	117259	119886	99867	124007	104983	97799.5	87816.7	110268	75702.7	108820	111004	97292.1	74798.1	107959	111665
Gm10136	A_55_P2180096	73496.6	91563	75994.4	94646.1	84129.7	82483.5	98758.5	94294	106864	85632.6	98277.1	111911	80468.5	117918	89855.1	89271.5	83288.7	96547.9	81106.7	99734.5	91141.5	86367.1	73496.6	111723	104640
Gm10268	A_55_P2032165	15675.1	28118.5	17650.4	15675.1	21492.7	21553	23746	27046	24385.4	22663.1	31005.1	28608.6	26781	27308.8	25966.1	21787	21320.7	29792.9	23706.7	35951	28433.5	28219.1	18416.1	29665.1	28872.6
Gm10290	A_55_P2012406	85067	170064	146070	101570	116846	108521	86912.5	188353	146390	160580	195665	115476	126267	151499	207160	140541	146939	94621.9	98007.2	85067	184917	129827	96597.6	147826	159198
Gm10290	A_55_P1984070	23024	61936	50137.4	24501.1	39037.7	36610	26471.5	67402.5	47166.9	53757.6	73288.1	33397.6	45296.5	46915.8	73122.6	49139	50273.2	31274.4	34789.2	23024	66709.5	44658.1	33371.1	48769.6	55572.1
Gm10653	A_55_P2181508	77007.6	122068	106613	100075	133705	123473	124777	143168	135974	125005	150702	137326	123302	140355	129210	135125	124981	121862	109911	130111	141667	103832	77007.6	148460	139705
Gm10653	A_55_P2042481	66389.6	88450.5	78486.9	103260	92304.7	86241.5	109251	99338	116258	87193.6	101474	117383	88757.5	123527	88246.6	91009	90125.7	85101.9	78395.7	111032	92624.5	84349.1	66389.6	119576	115981
Gm10653	A_55_P2022595	56436.1	83794	71588.9	101232	89444.7	79773.5	108097	86407.5	109614	78554.1	87257.1	113877	82702	114640	78493.1	88108	79798.7	77337.9	70093.7	115870	83774.5	72017.6	56436.1	124305	122085
Gm11810	A_55_P2185214	111648	169321	125003	111648	144485	146745	136391	163115	133590	125357	174396	143020	149403	135550	142719	158227	148608	171688	128142	138988	162613	141472	124407	143309	132543
Gm12034	A_55_P1989125	61207.6	111530	69162.9	70861.1	83764.7	79745.5	78930.5	89816	83580.9	79636.1	102228	95269.6	81303	91919.8	86516.1	81462	83157.7	108792	76851.2	91856.5	88051	77341.1	61207.6	81125.6	81198.1
Gm12034	A_55_P1974114	37559.6	61088	42187.9	44165.1	49701.2	49611.5	52653.5	54776	49641.9	46635.6	62190.6	57517.1	51855.5	62416.8	51982.1	49283.5	48903.2	67433.9	45703.7	61761.5	52611.5	46539.1	37559.6	49624.6	50531.6
Gm12070	A_55_P1966843	171139	215098	193386	195980	183345	184438	175060	221203	218430	217573	225008	198588	197780	217575	206973	204904	202625	176508	182105	187028	218545	196695	171139	225320	227454
Gm12070	A_55_P2139385	77571.9	126424	109874	88199.6	100107	89870.5	77760.5	152221	109743	123478	152575	100622	103450	129285	171712	115993	120486	77571.9	78864.2	78581.5	139390	105996	79768.6	136340	140480
Gm12070	A_55_P1955747	74306.4	143636	117003	100052	97866.7	90729	80639	154700	126471	133145	159581	103878	105701	127579	170112	113138	113062	74306.4	80344.7	78524.5	143670	105080	78316.6	137265	140998
Gm12270	A_55_P2176248	76835.6	116253	84909.9	83739.1	95157.7	97714	87738	117475	95397.4	92002.6	124481	102055	102862	105399	104829	105157	112995	119705	97584.2	104286	118152	98802.6	76835.6	109216	110333
Gm12508	A_55_P2130264	143591	219850	163800	143591	205088	207127	173323	239564	177524	200873	253250	189749	210014	181442	222274	213282	232048	221604	209356	199885	230264	186884	158288	208615	210165
Gm13004	A_66_P127036	39330.1	80204	54270.9	39330.1	70590.7	73373.5	61519.5	81517.5	65086.9	75348.6	83544.1	69402.1	69612	60084.3	68396.1	70077	72386.7	82771.9	64014.2	72143.5	73978.5	66929.1	51954.6	63212.6	66462.1
Gm13035	A_55_P2079041	117434	154722	125176	117434	162121	173921	134603	186473	148527	148343	196504	160519	161448	135691	124389	179812	185115	187171	160665	182444	160177	149815	124448	169399	152457
Gm13215	A_55_P2147291	67796.1	128154	87574.9	67796.1	107569	111919	107766	130677	96682.4	106440	132115	105451	109396	102761	103772	122159	118044	136469	98612.7	112778	132716	101693	79715.6	112272	110628
Gm13229	A_55_P1967144	31111.6	57869	40810.4	86537.1	63720.7	56353	102099	60097	116848	45885.6	67719.1	113406	51497	100898	48817.6	66758.5	61336.7	75667.9	49282.7	121153	60547.5	45789.1	31111.6	131172	103841
Gm13611	A_55_P1954886	137397	161570	138780	137397	152157	152261	141858	170616	156538	150032	183164	151624	159653	161459	161660	152708	147258	176389	145502	157939	167485	153733	141798	146951	143239
Gm13637	A_55_P2134042	79402.6	113386	88232.9	90269.1	86242.7	85232	89577	129606	135569	122574	143630	132456	122146	144646	126650	101142	107157	106870	126056	126062	121135	105660	79402.6	141582	129743
Gm13777	A_52_P84803	111950	175100	140623	111950	181041	178254	161227	189103	168858	163587	210470	180840	173437	149245	143473	186644	188859	199907	176871	196229	184634	157739	127167	190885	169219
Gm13981	A_66_P128701	53832.6	72334	60576.9	53832.6	73713.7	76915.5	69903.5	89606	78257.4	75964.6	95559.1	80185.6	80192	80114.8	77340.1	81728.5	81834.2	88732.9	79410.7	95396	80548	69783.1	57285.6	84118.1	81558.1
Gm14217	A_55_P1964525	115322	175567	131653	115322	142378	153466	152391	182337	160916	150569	192333	162034	158508	164610	138370	165381	145467	174612	128995	144166	174495	154172	132362	170434	171819
Gm14407	A_55_P2060663	45103.1	67865	50613.9	71192.1	64627.7	66366.5	73915.5	72242	85184.4	59304.1	77452.6	86106.1	63655	81278.3	70551.1	67833	61877.7	74999.4	59204.7	94924	70348.5	59545.1	45103.1	94876.6	84505.1
Gm14439	A_55_P2065330	57163.1	80712	67285.9	57163.1	82566.2	82967.5	65623	96285	77134.9	79825.1	101846	78859.6	83344.5	78105.3	87561.1	85645	90400.2	96363.9	90102.7	84766	91557.5	77212.1	60507.6	82963.6	76696.6
Gm14958	A_55_P1955287	153392	225221	174632	153392	182973	193408	176843	204341	185826	187556	233811	194875	200219	192562	205727	187871	192035	228634	170488	173473	225998	193624	163413	180461	171419
Gm15427	A_55_P2158350	117503	153821	117503	123122	151531	147375	138112	162632	148894	160718	172731	160306	137246	151426	151153	155869	151491	169811	161739	165656	151480	150215	117824	160166	153752
Gm15450	A_55_P2033462	90868.1	168245	118943	90868.1	140674	143984	140125	168936	129332	134004	173964	142612	148866	149278	149617	155669	148177	168835	130897	147437	168626	142901	111872	144578	145611
Gm15501	A_55_P1987514	142150	187761	153504	153157	188460	180349	192989	201278	184931	174050	207330	189555	176314	202724	164418	185931	171116	189804	178124	178845	181189	179827	142150	212861	183498
Gm16379	A_55_P1970806	49954.5	80897	68639.4	56359.6	60849.7	61669.5	49954.5	107815	82250.4	61599.1	104058	73154.6	68276	81217.3	95780.1	90193	107103	75253.9	69685.7	75724	82325.5	69885.1	62825.6	144165	125058
Gm16477	A_55_P2003720	31392.1	54465.5	42794.9	31392.1	55297.2	50923	50170.5	66444	53536.4	56952.1	66271.1	55850.1	56049	61140.3	54134.1	54273	57146.7	51365.4	49772.7	58029	59101.5	52211.1	39355.6	53979.1	57031.1
Gm2000	A_55_P1978151	163936	219820	178291	204002	192813	197083	181238	221624	216246	195519	228345	228631	196450	221583	210563	207899	194921	221600	185741	201110	223372	197254	163936	213553	190277
Gm2099	A_55_P2084345	16537.2	31253	18717.9	22869.1	16537.2	18701.5	17295.5	23262	24555.4	22128.6	27382.1	25431.6	25006	25480.3	18933.1	17527.5	19623.7	33914.9	27820.7	28368.5	23268	24798.1	21750.6	26223.6	20758.1
Gm3167	A_55_P1973357	47293.1	71353	48555.9	47293.1	60612.2	61594.5	61080.5	67408	58822.4	56185.6	71208.1	65353.1	62700	65368.8	63926.1	61983	61902.7	70864.9	56451.7	64701.5	67558	62640.1	48131.1	61680.6	60243.1
Gm3988	A_55_P2116604	19681.6	34398	23584.9	20820.6	34222.7	30925.5	29778.5	38484	30177.4	32860.6	40735.6	30477.1	31336	35621.8	40917.6	31141	34667.7	33172.9	32969.7	34485.5	36582	31932.1	19681.6	35533.6	37879.6
Gm4130	A_55_P2102719	18273.1	65435.5	47944.9	18273.1	83612.7	70888	70962.5	82515	61887.4	84406.6	87571.1	62412.1	70463	68193.8	61557.6	70333	77772.2	73951.9	73236.2	73941	75350.5	57136.6	38286.6	73941.6	73894.6
Gm4416	A_55_P2058493	45595.6	73044.5	48996.4	52300.1	71518.7	63611.5	64768.5	78983	68207.9	64640.6	84314.1	72720.1	65652	78347.8	74817.1	67646	71629.7	70740.9	65299.7	78709.5	74721	65218.1	45595.6	83389.6	83635.6
Gm4416	A_55_P2058494	28823.1	45469.5	34790.9	28823.1	48808.7	46030.5	37143.5	55995.5	38479.9	47972.6	59498.1	39097.1	47514	45613.3	58437.1	46857	49094.2	46778.9	46849.7	44426	53316.5	45721.1	31648.6	47797.6	49127.1
Gm4613	A_55_P2172619	111045	165739	113142	123312	141810	138123	112892	135742	137434	133974	157468	141391	138250	123458	139185	134284	137127	172950	149522	145054	135741	130277	116461	142992	111045
Gm4802	A_55_P2026437	64161.6	86843	67553.9	81399.6	78987.7	74819.5	75525.5	87900	87569.9	77176.6	94209.1	83580.1	70327	94006.3	86650.1	82321.5	84291.2	93083.9	86012.7	112694	86722.5	81449.6	64161.6	107149	104305
Gm4825	A_55_P2103807	30860.1	46165.5	33287.4	30860.1	38300.2	40399	36689.5	46645	38413.4	41664.6	45626.1	43016.1	39885.5	43382.8	38675.1	41158.5	43850.2	43992.9	36197.2	45363	46000	39677.1	31400.6	41229.1	40523.1
Gm4832	A_55_P1956819	18956.1	29200	20962.9	39161.1	25620.7	22715.5	43589	26032	44725.9	22983.6	31247.1	50190.1	24513	54895.8	27308.1	26111	24907.7	29699.9	22951.7	47354	29155	28383.6	18956.1	51081.6	50817.1
Gm4838	A_55_P2035590	19895.1	39180	25603.9	19895.1	32093.7	32053.5	28402	33415	26908.4	28321.6	41215.6	27786.1	33224	26180.8	33292.1	28730.5	28811.2	40149.9	28338.7	31549	33103.5	34300.1	27087.6	26219.6	27831.1
Gm4883	A_55_P2147191	104299	142349	104299	106344	149955	141620	119249	163447	133474	150872	172890	142583	142935	114252	130519	150628	153474	159228	152457	172755	129274	140670	114370	151470	140366
Gm4889	A_55_P1965075	74643.1	114807	81449.9	77894.1	108212	105697	94842.5	124609	97323.9	105419	133195	102456	108607	104764	120463	108792	116421	114598	108169	111673	119937	99670.1	74643.1	115875	117036
Gm4910	A_55_P2008870	10451	19452	10710.4	14056.1	11557.7	10451	16360	17085.5	17898.4	14717.6	18507.1	20805.1	14974	18563.8	10862.1	14076.5	14512.7	25655.9	14260.2	26553	15293.5	18124.1	11275.6	16695.6	18566.1
Gm4963	A_55_P2057653	69424.6	106594	84295.9	69424.6	86207.2	98130.5	81259.5	114791	81726.4	80717.6	112299	84383.6	104793	97754.3	104512	96366	105715	119070	89827.2	87303	115155	96376.1	78033.1	79263.6	90825.1
Gm4963	A_55_P1989797	45564.1	81828	60937.4	45564.1	62303.7	69080.5	46927.5	80483.5	54312.4	61384.6	85786.1	58647.1	74215.5	63562.8	70492.1	70616.5	73584.2	88514.4	67583.7	52973.5	86203.5	70133.1	54006.6	54554.6	56320.1
Gm4963	A_55_P1989798	38668.6	65255	43054.4	41365.1	44384.2	49132	46515	58372	48482.4	42718.6	62959.6	50088.1	54170	57309.8	52532.1	49902.5	52992.2	64177.9	46916.7	51551	63482.5	50340.1	38668.6	48914.6	50830.1
Gm4987	A_55_P1999154	11105.6	16209	12133.9	14310.6	15627.2	14550	19792.5	16965	21557.4	13156.1	19685.1	22078.1	15365	27399.3	18538.1	14016	12959.2	18443.9	12530.7	19467	17185.5	16790.1	11105.6	19938.6	22861.1
Gm4997	A_55_P2121537	91158.6	136062	91777.4	92961.1	112849	107082	115911	121027	118960	114976	142073	132137	119787	114036	105578	115714	113094	153463	122425	150061	117592	119558	91158.6	142560	129148
Gm5069	A_55_P1967330	33008.6	68562	53635.4	41753.1	42647.7	39689.5	42008	75781	72968.9	61736.1	76017.1	51402.1	45215.5	74739.8	90694.1	55231	54747.7	33115.9	35676.7	36416.5	72805.5	45900.6	33008.6	74963.1	90161.1
Gm5069	A_52_P12806	27196.4	55283.5	44129.9	36346.1	37488.7	33345.5	27762.5	60005	41864.4	51481.1	65315.1	36020.6	40193	45798.8	70059.1	47062.5	47534.7	27196.4	30868.7	29592	56607.5	40625.6	29669.6	52650.1	59218.1
Gm5069	A_55_P1967533	10516.1	35472	27386.9	10516.1	21232.2	18902.5	18095	37254	29564.4	31634.6	38577.6	20485.1	25443	32745.3	39216.1	27189.5	27060.7	16400.4	18728.2	14205	36723.5	26075.1	17395.1	27436.6	37916.1
Gm5239	A_55_P2076278	168448	210116	172882	169757	190195	193365	168448	217056	183792	198317	231507	177893	189522	192161	212877	210122	207443	231346	215361	217682	221075	197988	175402	210764	209415
Gm5244	A_55_P2119721	135912	184571	151085	190879	184735	186142	212887	193812	224258	162599	208012	226543	167102	222773	162214	201800	183724	207889	164316	236024	191640	159266	135912	247416	224414
Gm5292	A_55_P2005691	74347.1	109761	85759.9	74347.1	97382.2	99509.5	74675.5	117778	89007.9	105724	126834	92394.1	105216	90319.3	108682	102888	101176	107072	92086.7	99888	113464	101216	83658.1	91167.6	83937.6
Gm5292	A_55_P2163404	19918.6	35040	24050.9	20900.6	31983.7	28146.5	34828.5	35598.5	43046.9	30650.6	40269.1	42999.1	32401	49655.3	35918.1	31370	30395.7	32710.9	27709.7	42824.5	37691	32168.1	19918.6	37648.6	44888.1
Gm5321	A_55_P2038831	35421.1	71831	50188.9	35421.1	63432.2	62381.5	62589.5	71806	66626.4	59900.6	77117.1	60522.1	62765	67441.8	68130.1	66969.5	66077.7	81929.9	60564.7	68591	72322.5	62688.1	45097.6	62701.6	68200.1
Gm5445	A_55_P2033845	53121.1	85829.5	62957.9	53121.1	78400.7	77668.5	73389.5	86914	76362.4	77745.6	99679.1	85251.1	82574	69319.3	70284.1	73342	75510.2	88072.9	76216.7	85872.5	80791.5	77468.1	61192.1	77642.6	72820.6
Gm5450	A_55_P2073977	24108.6	35231	27250.9	24316.1	27947.7	26584.5	29080.5	41232	41869.4	38822.6	44451.6	40885.6	39054	45183.8	39480.1	31686	32053.2	33419.9	38508.7	39715	38417.5	33754.1	24108.6	43025.6	40771.1
Gm5451	A_55_P2022116	77641.6	100443	90394.9	77641.6	108412	117004	99792.5	129463	111644	106117	132646	108971	115160	102905	110420	119162	104352	124433	99968.7	109360	122379	100685	83272.1	117744	106651
Gm5451	A_55_P2046178	13382.6	23053.5	17689.9	52601.1	24871.7	21690.5	78408.5	24243	81375.9	19111.6	28977.1	80906.1	21072.5	77684.8	17727.1	24137.5	19399.2	27322.9	15803.2	73795	24655.5	20210.1	13382.6	83795.1	77717.1
Gm5506	A_55_P2008327	99223.5	159141	144668	124606	107861	99223.5	109177	156787	163186	167956	173464	144197	135315	155604	157593	142667	133535	112938	113028	128128	143760	137740	117285	170428	165766
Gm5506	A_55_P2087561	11189.6	41090.5	37414.9	11189.6	23348.7	19859.5	20739.5	40337	33074.4	39509.6	48021.1	25279.1	32007	29178.3	27556.1	32636.5	30524.7	23251.4	24646.7	18987	32406	33225.1	27769.1	31579.6	35735.1
Gm5526	A_55_P2154173	160335	253125	202745	194242	165329	170820	174314	211187	226449	248776	234270	206577	206397	185986	199225	184275	160335	206808	201577	193609	203179	193063	164095	183301	170269
Gm5528	A_55_P2033927	90082.6	121103	93586.9	105548	113457	112338	122828	121001	133507	106306	132872	137129	117769	120521	106057	107634	105480	123799	107011	142260	114764	107288	90082.6	133139	123674
Gm5537	A_66_P111747	33096.6	68414.5	68411.4	33096.6	48095.7	45364.5	43727	73031	68875.9	56176.6	96550.1	52688.1	56894.5	60189.8	55011.1	56282	50603.7	51561.9	45025.7	47823.5	54018.5	61084.6	56221.1	92656.1	82874.6
Gm5561	A_55_P2044557	176039	257307	196810	187298	240957	225608	234640	245519	258911	229949	263082	249271	223710	258628	235937	239942	237820	266847	243819	245026	260617	217720	176039	268573	260616
Gm5614	A_55_P2096283	19009.6	30568.5	21485.9	19009.6	25389.2	23862.5	24409.5	28156	27257.9	22958.6	32923.6	26206.1	27385	31205.8	28225.6	23298.5	22285.7	34428.9	24645.2	28002	29355.5	28813.1	21663.6	21431.6	23111.1
Gm5623	A_55_P2026025	84106.1	145141	98477.9	84106.1	98002.7	107434	89567.5	123242	100630	110035	146848	111906	128814	94110.3	94416.1	110105	114657	155960	105518	114832	131120	122545	98114.6	107540	107183
Gm5637	A_55_P2166555	42978.6	60541.5	68544.4	42978.6	83067.2	79136	58169.5	84414	69295.4	71093.6	94379.1	65072.1	77344	50426.8	47198.1	73428	72546.7	71596.9	77526.7	67065.5	75086.5	72746.1	58492.6	69367.6	65530.6
Gm5766	A_55_P1968450	59765.6	86451	82801.4	59765.6	100471	94970.5	83359.5	115879	91138.4	104828	119660	95520.6	101970	106580	104398	103640	102350	97878.9	95397.7	95660	114114	95253.1	74500.6	93413.6	96617.1
Gm5766	A_55_P2015632	58202.6	88992	73204.9	58202.6	85659.7	90277	75096.5	110324	80294.9	91293.6	113971	86423.1	97704.5	91763.8	85801.1	92411	95705.7	84430.9	87987.7	89842	102910	82272.1	69977.6	87408.1	91899.1
Gm5786	A_55_P2133901	118658	192792	171595	118658	220939	206240	175769	228269	177036	213185	245982	170673	203824	178722	201337	215177	204544	187716	173379	176645	220641	161062	121064	200366	189261
Gm5908	A_55_P1955209	51570.6	70202	55750.9	54974.1	72179.7	74327	61947	83926	75891.4	69398.6	89436.6	79090.6	71407.5	69343.8	78245.1	73143.5	77870.2	88773.4	75808.2	80673	77271.5	68111.6	51570.6	82839.6	71445.6
Gm5921	A_55_P2007464	258421	341596	305187	267828	345090	341536	305315	360218	334093	353557	371872	329488	329084	326607	322901	347740	331210	330356	313713	308026	347651	296560	258421	344002	309820
Gm5921	A_66_P126686	66412.1	133108	112684	66412.1	154149	141866	147588	169369	147650	152606	175829	154565	147809	161405	141967	155552	157904	135122	131951	156306	161087	118208	88190.6	158194	163666
Gm5963	A_55_P2079729	68214.6	133931	88949.4	68214.6	100461	100333	88911.5	114997	93276.4	101962	133145	96836.1	113681	91822.8	101266	108204	105460	144222	110325	107136	121847	108581	92358.6	93381.1	92622.6
Gm6010	A_55_P2183551	36368.6	65388	49627.4	36368.6	65431.7	66612	55924	82568	57289.4	67850.6	85877.1	59485.1	67535	64093.3	76911.1	68804	75004.2	69482.9	66774.7	64626	74007	62486.1	47676.6	66434.6	71646.6
Gm6030	A_55_P1993879	45769.1	73339	54694.9	76236.1	62187.7	60498	89350.5	72156	92493.9	54661.6	79443.1	95959.1	62219	109744	69883.1	70244	64330.2	78681.4	58893.2	91753.5	79788.5	66151.1	45769.1	99895.6	92021.1
Gm6109	A_55_P1963105	64605.6	78233.5	65175.9	67934.1	78301.2	84722.5	75874.5	90582	75275.9	76424.1	88682.1	84762.1	79894	89489.8	87512.1	80768	82945.7	92890.9	67726.7	91488	88655.5	75723.6	64605.6	91593.1	85783.1
Gm6222	A_55_P2122491	31813.6	52519.5	40958.9	34650.6	41179.7	39790	42643.5	52473	45402.4	43998.1	46995.1	45788.1	34710	56938.3	49646.1	42074.5	44906.7	44043.4	43124.7	52486	48984.5	38225.1	31813.6	53500.1	51490.6
Gm6404	A_55_P2041894	114012	154935	114012	121961	127196	139808	126635	155209	142977	125987	169008	164829	151171	142586	141160	135217	153704	176060	134266	152178	160567	142222	118882	160746	148469
Gm6404	A_55_P2041893	41541.1	75669.5	48356.4	41541.1	56399.7	58069.5	51664	67350	54108.9	53219.6	78089.1	66175.1	67926.5	56451.8	59220.6	58715.5	65845.7	80849.9	55980.7	68052	73502.5	67984.1	49387.6	61080.6	65956.1
Gm6498	A_51_P291460	45118.9	85294	75131.4	56931.1	62792.7	59729	45812	95621	67979.4	85549.6	105713	57691.1	71385.5	76201.8	117459	78850.5	84481.7	45118.9	54534.7	48812.5	93047	66763.1	52678.6	79589.6	92675.6
Gm6525	A_55_P1965524	28499.6	48498.5	29456.9	33496.6	47264.7	44308	48077.5	43553	50257.9	38768.6	49831.1	55097.1	40183.5	50257.8	40090.1	40534.5	40894.7	52085.9	35634.7	56898.5	43079.5	36851.1	28499.6	54458.6	52271.1
Gm6548	A_55_P2053456	104490	174238	133463	104490	149033	146920	133213	184589	155797	185037	212623	140081	168143	140593	162177	148196	131005	181482	167372	162151	172858	169234	140909	170318	161830
Gm6636	A_52_P131372	157995	259133	196011	157995	213134	215524	198491	232351	218353	213053	264212	217890	223281	192083	233984	203377	204224	256455	206577	204811	230332	224258	192967	199894	196765
Gm6790	A_55_P2017774	190905	246990	191872	191869	227751	217678	225914	236357	234955	211093	262745	250236	225460	256092	221007	206887	195923	245331	198225	235879	248063	219805	190905	257929	242312
Gm6813	A_55_P1962411	88177.1	122020	92621.9	99968.6	120440	109471	111094	120965	121866	115008	129804	122292	112519	119276	116504	107456	107109	123671	119048	114090	112120	114959	88177.1	125940	109466
Gm6813	A_55_P2082779	37489.1	85736.5	60857.4	37489.1	74222.7	70697.5	67193.5	85255.5	66350.4	75813.1	94861.1	74842.6	80434.5	63436.8	70186.1	66602	71172.2	83894.4	79367.2	79356	78814.5	76891.1	59205.1	67155.1	67571.1
Gm6813	A_55_P2143561	30964.6	48172.5	32935.4	48359.1	46302.7	43406	53034	47798	63514.9	43604.6	54162.1	65372.1	43482	59995.8	44202.1	39947	39632.7	49092.4	41820.7	64720.5	42570.5	44018.1	30964.6	62866.6	51277.1
Gm6900	A_55_P2006422	63013.6	93101.5	83256.9	83520.1	88521.7	83398	79629.5	106463	111296	95930.6	112051	110108	94302	124500	98007.1	93248	87380.2	97151.9	91576.7	98417	100974	63013.6	72360.6	110781	98473.1
Gm6900	A_55_P2160648	54776.6	76789	62108.4	61653.1	66162.7	62443.5	56500.5	81863	88082.9	71589.6	87058.1	90182.6	76203.5	97229.8	74481.1	72235.5	66586.7	77303.9	70299.7	83570.5	79675	73254.6	54776.6	91069.6	76471.1
Gm6921	A_55_P2037525	35712.1	61522.5	44964.9	35712.1	62226.7	56594	47284	67916	56568.4	73418.1	74471.1	54430.1	60294	51144.8	87559.1	55446	61491.7	65321.9	62019.2	61762	63203.5	52133.1	42620.6	60892.6	46920.1
Gm6981	A_55_P1961188	43728.6	85128.5	69253.9	52165.6	59421.7	54601.5	50523.5	98496.5	90061.9	79727.6	99030.6	60323.1	59960	93018.8	120273	70987	72793.7	45638.9	48155.2	45780.5	95237.5	63939.1	43728.6	92876.6	103639
Gm6981	A_55_P2136832	38094.9	79074	61439.9	59886.1	53060.7	49199.5	38923	86345	74133.4	73218.6	88230.6	56450.1	54399	75460.3	100597	59990	62500.2	38094.9	42542.7	42531	78944.5	57567.6	40645.6	77733.6	81418.1
Gm7065	A_55_P2170419	75504.5	117141	84477.9	77178.1	99089.2	95593.5	75504.5	108470	91568.9	106647	116960	101966	101674	81211.8	93901.1	89817	94384.7	120215	112191	113730	106252	101537	81712.1	103200	85571.1
Gm7251	A_55_P2185359	36463	92607	76338.9	37315.1	57815.7	55827	38860.5	100260	68111.9	82604.6	106837	49131.1	66974	69402.3	104007	75283	75921.2	47691.4	52032.7	36463	98457	68283.6	52212.6	69495.1	82189.6
Gm7536	A_55_P2016967	18194.6	28935	20832.4	43373.1	28945.2	27112.5	46467.5	29748	53729.4	24543.1	33926.1	52453.1	28289	52615.8	30120.1	29988	26485.7	33136.9	25802.7	58845	30095	25190.1	18194.6	61496.6	55555.1
Gm7555	A_55_P2009007	29170.1	57156.5	41160.4	29170.1	51042.7	51590.5	52430.5	59482.5	52909.4	51041.1	62021.6	56653.6	57271	52881.8	49939.1	47667	50833.7	56794.9	55554.2	59999.5	53454.5	51750.6	41693.6	48892.1	54061.1
Gm7555	A_55_P2009008	17670.1	39942	28111.4	17670.1	35581.2	33171	34842.5	39800	33141.4	34200.6	43265.6	37103.6	39351	33758.3	33849.1	32766	33839.2	41586.9	36453.7	42128	36839.5	35651.1	27425.6	32817.6	35297.6
Gm7634	A_55_P2061452	38903.1	57407	41273.9	38903.1	49035.7	49569.5	51031.5	62378	49339.4	53781.1	68801.1	58589.1	57450	55172.8	61186.6	49412.5	49917.2	70027.4	51758.2	70184	62526.5	59686.1	42468.6	61596.6	61652.1
Gm8054	A_55_P2029740	39557.1	59677	42471.9	47144.1	53179.2	49246.5	62155.5	59269	66828.4	51417.6	63585.6	73806.1	52195	61383.8	47314.1	49461.5	48371.7	58934.9	46722.7	71394	54279.5	53853.1	39557.1	67326.1	62468.6
Gm8230	A_55_P2096367	21486.6	50550	42151.9	21486.6	39736.7	37674	33997.5	59923	42753.4	51052.6	51368.1	35995.6	40101	49382.8	53548.1	44422	45128.7	39701.9	42424.7	33218	54898.5	39907.1	33124.6	44774.6	45562.6
Gm8526	A_66_P122877	101341	144384	111240	110331	135612	129056	136966	146931	140319	126698	161770	150813	141826	125510	120533	122351	123554	147994	131399	147409	136738	128780	101341	144342	130951
Gm8580	A_55_P2064896	22325.1	38364	27955.9	22325.1	38166.7	35865	29713.5	44195	30466.9	39656.6	48576.6	30160.1	37589.5	33417.8	44605.1	37099	39755.7	38304.9	37945.2	35455.5	43380.5	36094.1	24358.6	37547.6	39562.1
Gm8709	A_55_P2007768	97520.5	186594	158155	118011	132675	131423	105861	221432	174509	176661	226764	132581	146126	176192	242786	174308	169907	109946	110092	97520.5	213042	140919	105981	178767	196131
Gm8759	A_55_P1982107	82137.1	104706	88566.4	104475	106850	98957.5	107798	108515	119002	100998	113849	122241	93978.5	130375	106941	101395	95333.2	110441	93058.7	113040	102322	101710	82137.1	123961	112715
Gm8842	A_55_P2125743	120998	171265	152740	139975	181889	176889	164291	197527	173611	175039	204151	178989	170678	188334	170765	184283	173971	168362	155745	181275	185268	159309	120998	192000	191498
Gm885	A_55_P2109486	203638	222711	209537	221064	217020	219121	214728	233329	222589	229854	236645	226944	218106	245368	205802	220930	203638	227368	208406	218267	226404	230455	220289	238562	222514
Gm885	A_55_P2109485	59726	75598	84504.9	91006.6	61792.7	77734.5	81532.5	94304	93706.4	65857.1	89197.1	99086.1	80480	124285	86729.1	79798.5	68037.7	69897.4	63297.2	59726	114341	91183.1	81365.6	95865.6	94656.6
Gm9000	A_55_P2121846	55084.1	78141	55173.9	72160.1	62709.7	63645	89488.5	70757	93180.9	63883.6	79853.1	94697.1	65049	97092.8	59985.1	66447	59270.7	73887.9	59824.7	98233.5	73315.5	66781.1	55084.1	105918	92527.6
Gm9104	A_55_P1975026	47474.6	70082	51730.9	50539.1	63592.7	63587	59052.5	70429.5	69781.9	63169.6	76825.1	79280.1	65593.5	62049.3	58868.6	60713	57755.7	72323.9	59955.7	72005.5	65374.5	62307.6	47474.6	73937.6	63505.1
Gm9457	A_55_P2155616	81269.6	105294	91134.9	81269.6	114446	118995	94499.5	131537	100786	112260	134910	108021	116594	101946	93264.1	122036	118481	127805	91043.7	103709	121806	96643.6	87803.6	113664	106641
Gm9790	A_55_P1958867	26437.1	46512	36464.9	26437.1	37921.7	36578	37569.5	45806.5	44641.9	38452.6	67929.1	47093.1	42688	41870.8	45079.6	45863.5	46025.7	47360.9	31393.7	39672	43688.5	42357.1	33354.6	66221.1	63428.6
Gm9843	A_55_P2067142	188716	234959	188716	209866	222104	220984	210766	246796	231934	225670	260345	227761	227420	221317	232798	230819	232622	250316	235540	252180	240345	225501	201682	257169	246147
Gm9892	A_55_P2126827	22462.1	42393	31029.4	25978.1	28921.7	27735	27183.5	52703	31780.4	34899.6	34888.6	35529.6	33722	50045.8	42290.1	42600	41809.2	31489.9	25822.2	28728	39520.5	37452.1	22462.1	36487.6	40306.1
Gmfb	A_55_P2045770	10661.1	16833.5	18179.9	10661.1	17015.7	18408.5	17402.5	22913	17700.4	15294.6	19518.1	18030.6	17592	28220.8	16113.1	17744	19886.7	20682.9	18486.7	15864	23059.5	15026.6	13435.1	20534.6	20869.1
Gnai2	A_55_P2004137	19967.1	31721.5	29187.9	39669.1	31372.7	26044.5	38156	26169	46243.9	30536.6	31985.6	35530.1	27946	38931.8	27404.1	23050	21779.7	26398.4	22515.7	32667	23669.5	24338.1	19967.1	38947.6	31951.1
Gnas	A_55_P2081313	48721.1	74585	60945.4	48721.1	62768.7	57836.5	52000	72898	58780.9	74214.6	84417.6	55426.1	68794	59394.8	51916.1	51162	51579.2	61265.9	68245.7	60318	63084.5	69863.1	60921.6	57684.1	63690.1
Gnb2	A_55_P1987264	62458.6	72903	78318.9	63559.1	97433.7	88127.5	85481	101631	97601.4	97490.6	101569	84894.1	88700	88943.8	90757.6	81782	85735.7	76472.9	83950.7	87609	88670.5	69743.1	62458.6	102177	90801.1
Gnb2l1	A_51_P488673	183842	233578	196753	183842	224867	225683	212771	249774	231549	218866	255531	238140	226582	235716	209992	236516	225277	233277	209101	230648	241214	217715	194205	247629	227099
Gng5	A_55_P1988259	50917.5	89371.5	69457.9	60885.1	60369.7	59570.5	50917.5	83249	65773.4	73727.6	77215.6	68803.1	64105	71557.8	79036.6	62188	72041.7	70661.9	64235.7	62364	81056.5	74060.6	57706.6	69663.1	75211.1
Golga7	A_55_P2027323	10199.1	17754.5	15513.9	10199.1	14270.7	13891.5	10973.5	14575.5	10418.4	10881.6	13220.6	20649.6	11031	11474.3	11816.1	12269	11444.7	16162.4	16021.2	15143.5	16291	25881.1	16639.6	11955.6	10603.1
Gpi1	A_55_P2022434	75798.1	95240.5	112469	75798.1	98510.7	95952.5	87108	141394	119671	96013.1	140097	120118	114964	104025	96349.1	101556	100046	79902.9	83436.2	80726	125452	133664	103289	140637	134601
Gpi1	A_55_P1992208	60144.1	91887.5	89693.4	60144.1	76528.7	73449.5	73684.5	113977	94345.4	76366.6	112307	98964.6	88800.5	87270.8	72531.1	76930	82366.2	60709.9	64656.2	65447	98309.5	110412	79708.6	105519	111887
Gpi1	A_55_P2030433	49682.1	76633	73191.4	49682.1	62602.2	60711.5	56875.5	95580.5	76638.4	60059.1	97359.1	83838.1	69381	67560.3	63372.6	64194.5	65590.7	51314.9	50781.7	53462	82615	96391.6	65263.1	92758.6	89793.1
Gps1	A_55_P2087384	28576.1	39838.5	45293.9	28576.1	51432.7	50347.5	46451.5	63466	50690.4	44868.6	54074.1	46510.1	44290.5	48430.8	41305.6	52876	55850.7	44299.4	43209.7	43146	54207.5	39584.1	37144.6	49461.1	50397.1
Gps1	A_55_P2143968	20663.1	31539	34255.9	20663.1	38712.7	38949.5	34201	50319	37444.4	34993.6	42404.1	35719.1	34239.5	36697.8	32576.1	40182	43182.7	34011.9	34606.7	32882	40371	31705.1	28250.6	36760.6	39317.1
Gpx1	A_52_P684378	26996.6	88884	66954.9	43887.1	48086.7	47528.5	36833.5	82859.5	61414.9	99089.6	99969.1	58829.1	76662.5	44357.8	48265.1	47921	47932.7	63787.4	68515.7	63875.5	38291.5	56497.1	44642.6	26996.6	29175.1
Gpx4	A_51_P462448	35741.6	74375	56907.4	35741.6	51519.7	54552.5	41635.5	69380.5	52412.4	67387.1	72691.1	53693.1	62968	52136.8	66247.1	46659	50260.7	59556.4	48907.2	41084	55810.5	62040.6	54286.6	51750.1	45641.1
Gpx8	A_51_P495232	16447.8	30817	20345.9	16592.1	22690.7	23467.5	19252.5	24538	18728.4	23974.6	26279.1	22613.1	22128	16447.8	26397.1	18262	17688.2	36756.4	36746.7	30046	31066.5	25844.1	21299.6	18875.1	18641.1
Grinl1a	A_51_P183853	15327.1	23770	25112.4	15327.1	24239.7	22246.5	22942.5	29808	26396.4	24013.1	28500.1	24109.6	24409.5	32590.8	25512.6	22882	24290.2	24768.9	25857.7	25649.5	30104.5	27962.1	26085.1	22490.6	23417.1
Grpel1	A_51_P122723	10013.6	17413.9	13587.6	10669.5	12327.2	12216.2	10795.3	17316.3	13781	15021.7	14716.6	12261.6	10979	16083.8	19213.7	15377.8	15684.1	11754.3	11400.9	10551	18818.2	12024.8	10013.6	15196.8	15000.6
Gsn	A_55_P2055638	16543.7	24467	24329.4	26659.1	27234.2	21242.5	31689	27760	25311.9	21802.6	26616.1	35007.1	27071	40180.3	20155.1	21162	16543.7	36496.9	33526.7	52009.5	24631	33300.1	25583.6	41258.1	39327.1
Gstp2	A_55_P1957038	57337.6	73288	63997.9	57337.6	79631.2	83741.5	79733	86471	76620.4	75506.1	97632.1	86479.1	86585	79094.3	66499.1	85705	88235.7	82518.9	78698.2	85644	86060.5	74489.6	65176.6	91406.1	85091.6
Gtf2f1	A_55_P2074473	14661.6	29718	24348.4	16061.1	29459.2	28827.5	25910.5	35677	28688.4	29840.6	38041.1	30185.1	30356	35222.8	33918.1	28794	29323.2	25907.9	28676.7	24248	37403.5	24908.6	14661.6	25708.6	27135.1
Gtf2i	A_55_P2073467	10087.1	18103	15195.9	10087.1	16287.7	15133.5	18718.5	19748.5	20132.4	14328.1	17944.1	19200.6	15227	26097.8	11810.1	14652	15232.2	22457.9	25868.7	23462.5	19133.5	22725.1	19170.1	23182.6	20372.1
H13	A_66_P124549	24488.6	37044	35626.9	26832.1	29105.7	24598.5	30736.5	38531	50481.9	50035.6	40276.1	35413.1	28923	42637.3	42365.1	30167.5	31159.7	24940.9	32237.7	32205	42649.5	27172.1	24488.6	34225.1	36235.1
H2afj	A_52_P407692	78028.1	156223	115029	106391	174038	176818	148645	157009	153533	136353	187311	138736	138742	173098	185067	208540	226116	114722	105135	115787	232818	89149.1	78028.1	145188	139406
H3f3a	A_55_P2065369	11653.1	21319	16104.9	14159.1	13885.7	13540.5	15656.5	16842	19573.4	16296.6	18903.1	17872.6	16225	21849.8	11653.1	13221	13070.7	23640.4	19425.2	22658.5	15020.5	18232.1	16137.6	17219.6	18906.1
H3f3b	A_55_P2059164	18445.1	30840	24220.4	18445.1	25202.7	23876.5	21659.5	27746	26416.4	23066.6	28851.1	26487.1	22672	41023.3	24492.1	26389	26206.2	32560.9	27687.7	31526	30391.5	30304.1	34350.1	41894.6	31213.6
Hax1	A_55_P2096187	15422.1	19529.5	21199.9	15422.1	26321.7	25770	21677.5	39749	30426.4	31882.6	30805.1	28395.1	24883	35466.3	35009.6	31201.5	32242.7	30423.4	26471.2	31260	36157.5	26432.1	18111.1	39000.1	39189.1
Hccs	A_55_P1955717	104045	135235	148459	155143	110668	138481	133955	144634	144918	124578	167229	174683	151596	191738	122755	125275	104045	168819	157348	123453	173414	188259	169690	152383	151683
Hdac1	A_55_P1970775	17876.1	29226.5	26320.9	17876.1	28824.2	25571.5	25825.5	31410	26914.4	22273.1	29151.1	25238.1	23501	48642.8	28137.6	27399	26708.7	30404.9	31888.7	28762	34645	30014.1	23380.1	29420.1	31596.6
Hdlbp	A_51_P416585	19962.1	33688	28516.9	19962.1	30249.7	26958.5	23737.5	44373	29108.9	46346.1	43324.1	24951.1	32885	25074.3	25842.1	35037.5	33056.2	23369.9	24062.7	22212	37354.5	28880.6	23911.6	33660.6	37739.1
Hgs	A_55_P2103856	10721.1	19908	19650.9	10721.1	18156.7	17451	17607.5	23139	20960.4	18660.6	23944.1	18925.6	18656	24088.8	18720.1	18675.5	19826.7	18951.4	22633.2	20536	24392.5	19070.1	17096.6	19417.1	23747.6
Hist1h3d	A_55_P2127139	17855.1	31438	24880.9	17855.1	31028.7	32834.5	24119	32334.5	27922.4	26218.6	32307.1	25330.1	26454	37210.3	29591.6	35282	38064.7	31434.9	27898.7	22902	35923	28149.6	32374.6	33047.6	27163.6
Hist2h2aa2	A_55_P2131438	70015.6	133684	96193.9	100822	155734	161690	137798	139921	149189	114011	162326	133457	123045	169297	169790	184266	206082	101595	90093.2	108354	204130	78192.1	70015.6	134761	135546
Hk1	A_55_P2037398	51583.4	63759	51583.4	75950.6	60702.7	61655.5	62950.5	64852.5	75004.4	61706.6	65240.1	83757.1	57184	90490.8	60031.1	62428.5	56120.2	63361.9	51868.7	82330	59373	61877.1	55406.6	83390.1	76517.1
Hk1	A_55_P2027999	11787.6	20718	18339.9	12261.1	14657.2	15000.5	13051.5	18901.5	15498.9	18245.6	18607.6	11787.6	13386	21291.3	14854.1	15285	14822.2	20444.9	25170.7	19533	15022.5	22230.1	18253.6	15469.6	16300.1
Hmg20b	A_55_P2112295	16405	24209	21353.4	20505.1	16629.7	16934.5	18436	26651	26439.4	21795.6	26125.1	25845.6	24741	25528.8	19287.6	16405	16458.7	20608.4	26529.7	27501	23482.5	27722.1	25349.1	26131.6	24662.1
Hmga1	A_51_P483118	12353.1	67820	63753.4	34612.1	19914.2	23114.5	24829.5	61796	54312.4	43052.6	75074.1	56917.6	67082.5	84283.8	130023	60114	69167.7	36697.9	52964.7	43214	156226	25363.6	12353.1	17039.6	28358.1
Hmgb1	A_55_P2032708	15315.1	19575.5	16433.9	15315.1	22406.7	23088.5	23227	22550	25120.4	19629.6	24293.6	21308.6	22921	28086.8	32144.1	29998	28703.7	26430.9	22417.2	19080	30201.5	18773.1	17783.6	29908.1	26801.1
Hmgb1	A_55_P2013501	12049.1	18218.5	14291.4	12049.1	19098.7	19761	19481.5	19846.5	19809.9	17928.6	22884.1	17288.1	20059	21694.8	26467.1	24766	25781.7	23044.4	19442.2	15307	26304.5	16232.1	16121.1	22595.6	20736.6
Hmgn1	A_55_P2171158	45856.1	62551	51802.4	45856.1	46968.2	49148.5	49887	68959.5	63411.4	53003.1	69261.6	65786.1	55935.5	82508.8	65558.6	58935.5	60391.7	65595.9	52900.7	54595	79006.5	49810.1	47274.6	60523.6	62697.1
Hnrnpa0	A_66_P118233	11232.6	14811	13246.9	11232.6	13207.2	11988	17691	16549	19279.4	13000.6	17064.6	17605.1	15191.5	24677.3	15823.6	18868	17988.2	18366.9	20624.2	22056	18221.5	15398.6	12178.6	20200.6	19171.6
Hnrnpa2b1	A_55_P2017082	11371.6	18582.5	17844.9	11371.6	21075.7	22675.5	19068.5	25324	19256.9	20545.6	23690.1	17992.6	18845	25569.3	25711.1	23540.5	19200.7	19600.9	19098.7	14305	30192	17689.6	16020.6	21488.6	22169.6
Hnrnpa3	A_55_P2031501	25043.1	47748	36032.9	28118.1	41771.2	44211.5	53084	50090	52510.4	37382.6	52898.1	48323.1	39913	64773.8	49289.1	45657.5	44174.7	38727.9	31768.7	32570.5	67967.5	34221.1	25043.1	47118.1	49936.1
Hnrnpa3	A_55_P1982613	13354	24203.5	20472.9	17445.1	22932.7	20023.5	23799	27817	26503.4	19955.6	27631.1	21856.6	22102.5	38360.3	27631.1	25105	23738.2	20853.4	16719.2	13354	31890.5	21185.1	14490.1	24203.6	22798.1
Hnrnpab	A_52_P20966	22057.1	46126	45792.9	22057.1	50530.7	46825	39785.5	64895	46672.4	51213.6	55771.1	36485.1	39966.5	58719.3	61955.1	61626	62621.7	31116.9	34438.7	29114.5	83890	39800.1	30053.1	44718.6	42970.1
Hnrnpc	A_55_P2171143	16370.1	29477	25407.4	16370.1	23688.7	23786	20828	37736	25224.4	32729.6	32850.6	22712.1	27613.5	33500.8	41503.1	30589	31267.7	30864.4	26840.7	26773	40892.5	23853.1	19336.1	27289.6	27771.6
Hnrnpf	A_55_P2028821	10502.1	19473	14663.9	13914.1	14569.7	17335	16155	20995	17960.4	14893.6	20088.1	16638.6	16675.5	25063.8	26066.1	21829	21720.7	15249.4	16301.7	13541.5	28924.5	15442.1	10502.1	23788.6	21692.1
Hnrnph1	A_55_P1956502	15300.5	26379	23719.9	20363.1	21576.7	23810.5	25652.5	25767.5	30884.9	23350.1	26935.6	25144.1	23167	31531.8	29634.1	23011	21909.2	21621.9	18564.7	15300.5	29668	21024.1	19027.6	28616.6	28067.6
Hnrnpm	A_51_P170946	10255.6	16898	14728.9	10397.6	14811.7	18005.5	17009.5	21237	18881.9	15354.6	19461.1	16372.1	15856.5	22646.8	15859.1	19391	18523.2	14444.9	13055.7	10754.5	24732.5	11486.1	10255.6	20000.6	18535.1
Hnrpdl	A_55_P2116993	11859.1	18222	19140.9	11859.1	19882.7	20404	20814.5	26512	20386.9	18180.6	25286.1	21239.1	21967	25059.8	16628.1	21846.5	20879.2	19683.9	16079.7	13710	27232.5	18920.6	14846.6	18460.6	20941.6
Hp1bp3	A_55_P1974362	14743.1	24989.5	22766.9	14743.1	25619.7	26219.5	24609.5	26549	27995.9	23628.6	31227.6	27872.6	27953	23499.8	19044.1	20528	19380.7	29099.9	30956.7	27005	25824	31949.1	27928.6	25691.6	22360.6
Hprt	A_51_P239673	12645.3	25834.2	20979.1	14290.3	12645.3	14139.8	13684	24022.3	16368.2	15846.6	19450.7	15252.8	15406.3	34705.3	19735.1	17685.5	17898.9	19382.7	17161.3	16238.1	26207.2	18064.3	13748	13315.4	17451.8
Hsd17b10	A_55_P2042698	13658.1	27310	19632.4	13658.1	23138.7	22172	16765	29722	17757.9	24852.1	31995.1	22421.1	30432	18260.3	19683.1	18784	21019.7	27708.4	25561.7	22738	20756.5	25271.1	19891.6	16974.1	16423.1
Hsp90aa1	A_55_P2057946	21340.1	45894	34939.4	25704.1	35570.7	37751.5	30392.5	52017	36483.4	35140.6	44556.1	39375.6	37431	56099.8	47485.1	45904	44040.2	33426.4	29049.2	24088	57929	31472.1	21340.1	39619.1	39053.1
Hsp90ab1	A_55_P2048434	91614.6	139719	124408	95526.1	121252	114842	120160	163091	136854	139341	158330	124234	124649	179379	164076	138257	126039	106797	102720	102994	185614	114601	91614.6	150238	141607
Hsp90b1	A_52_P624149	32753.1	60406.5	44858.9	46494.1	46622.7	44556.5	47038.5	62114.5	65017.9	61622.6	66968.1	57280.6	52062	55170.3	64381.1	48857	45221.7	51540.9	50056.2	51676	76744.5	43110.1	32753.1	75851.6	62776.1
Hspa5	A_55_P2076772	55741.1	71657	61001.9	56867.6	82768.2	76277	87494.5	100725	95228.9	87160.6	92473.1	89478.6	72792.5	93768.8	86948.1	90851.5	86408.7	85166.4	87875.2	83854	111175	65702.1	55741.1	100368	109230
Hspa8	A_55_P2080603	88381.6	128219	113453	126365	111782	112030	112884	133046	126659	122146	128702	130696	110966	141958	123688	120738	113634	124075	113945	128541	132158	88381.6	99980.6	132427	125260
Hspa8	A_55_P2069721	56281.6	92285	75812.9	60351.1	71213.7	68750	59387	96158.5	80571.4	81534.6	92073.1	74106.1	68747	83570.8	86356.6	80336.5	73143.7	78603.9	70919.7	74851	104214	71420.1	56281.6	82525.6	74414.1
Hspa8	A_52_P12877	10842.1	44997.5	41752.4	10842.1	33817.7	30993.5	26076.5	44732	31280.4	42435.1	42127.1	31065.6	33753	44457.8	23185.1	37244.5	36637.7	37388.9	41369.7	28171	53780.5	38268.1	31177.1	23536.1	25418.1
Hspb1	A_55_P2039284	41965.6	119687	112776	105034	80177.7	69760.5	66529.5	120082	109814	145267	118950	100296	81228	172719	155548	73534	71701.2	62451.4	71416.7	83918	126152	148234	67885.1	41965.6	60819.1
Hspe1	A_66_P124952	14970.1	28562	21195.9	20435.1	25850.2	27334	25039.5	35832	27422.9	20755.1	30552.1	29020.1	24224	42082.8	36949.1	33137.5	34830.2	29407.4	22576.7	24485	42071.5	20335.1	14970.1	31295.6	29511.1
Hspg2	A_52_P422859	20029	30038.5	28092.9	31223.1	26437.2	25873.5	22317.5	32987	32037.9	37541.1	33378.1	23648.6	26634	23840.8	31957.1	20029	22095.7	21118.4	30618.2	27523	29929	45688.1	36904.6	38822.6	26556.1
Htra2	A_55_P1973699	13580.6	15577	17372.9	13580.6	22302.7	21638.5	20331.5	30131	21200.4	19469.6	24142.6	19253.1	20870	23200.3	20568.6	22063.5	23324.7	17775.9	20001.7	19432	23900.5	19886.1	15843.6	20340.1	21404.1
Idh2	A_55_P2118684	15510.1	27570	21542.9	15510.1	28839.7	25197.5	30664	29602.5	34300.4	22503.6	36198.1	32662.1	30492.5	31398.8	22271.1	25662	28988.7	21670.9	19176.7	22396	29314.5	20770.1	20004.1	26554.6	28349.6
Idh3g	A_51_P136729	12125.1	19190	13823.4	12125.1	16981.7	16576.5	14997.5	18572.5	17283.4	17698.1	19650.6	15289.1	16134	18825.8	16753.1	15819.5	18013.7	16898.9	19961.7	17815	16760.5	14861.1	12167.6	14831.6	16447.6
Ier5l	A_55_P2121856	10162.1	16190	14876.9	10162.1	36266.7	32833.5	31486	19852	30608.4	17766.6	29027.1	23672.1	21738	32393.8	24760.1	30395	30056.7	23975.9	21606.2	27439	23283.5	26680.1	21563.6	37765.6	31837.1
Ift27	A_51_P474422	14327.1	21237	18521.4	14327.1	28985.7	27841	23480.5	21816	19457.9	21155.6	26859.1	22768.6	25380	15226.8	14473.1	16032.5	17896.2	28822.4	29227.2	27947	17027.5	22994.1	22777.6	16344.6	14735.1
Ik	A_51_P231687	13040.1	29651	22519.4	13040.1	20302.2	20529	17607	26690	21462.9	20540.6	26523.1	21338.1	21844	23892.8	18606.6	20374	20219.2	29003.9	26076.7	24425.5	25949.5	25154.6	22549.6	20928.6	20698.1
Ilk	A_55_P2139473	21856.1	43940.5	37721.4	21856.1	23332.7	24690.5	21944.5	48062	29807.4	46877.1	44036.6	26082.1	33165	34639.8	46364.1	28946	27957.2	24143.9	27831.2	22914	40881	35398.1	25605.1	24167.6	33508.1
Imp3	A_66_P124497	13213.1	23812	20383.9	13213.1	24043.7	22318.5	21038.5	30019	27793.9	22538.1	28597.1	26817.1	23607	29369.3	27210.1	27023.5	30881.2	21464.9	23576.7	25612	28180	26092.6	20443.6	25172.6	26054.1
Impdh2	A_55_P2112922	10935.1	16423	14554.4	10935.1	19894.2	18221.5	19359.5	20996	22201.9	16111.6	22105.6	19351.1	17156	24016.3	21265.1	25852	27604.7	16052.4	18457.7	17514.5	28168.5	14993.1	11112.6	21628.6	21936.1
Inf2	A_55_P2085295	10532.5	32114.5	31554.9	21701.1	12238.7	10532.5	10728.5	36079	28569.9	28129.6	38807.6	24240.1	25041	22938.8	16390.6	20962.5	19703.7	17230.9	22497.7	18465	28860.5	32726.1	28708.6	19229.6	20349.1
Itpripl2	A_55_P2046348	11069.5	18352	21511.4	12542.6	21232.7	23171.5	18853.5	20233	18178.4	18355.6	20916.1	14892.1	18625	18439.3	21263.1	21473	22143.7	15646.9	14996.7	11069.5	31706.5	16085.6	12954.6	18004.1	16383.1
Itsn1	A_55_P1994603	15187.6	25676	28407.9	15187.6	41621.7	42874.5	53474.5	30160	44660.4	24376.6	29910.1	50716.6	32962.5	63200.8	27568.6	24246.5	25224.7	44933.9	43199.7	61822	39337	27845.1	22392.6	69606.6	36579.1
Jkamp	A_55_P2003123	14063.1	22681	18121.4	14063.1	17722.7	17826.5	18261.5	23046	19390.4	18824.1	21518.6	22705.1	18586	26768.8	15679.6	16671	16561.7	22098.9	19372.7	21088.5	20523.5	18319.6	16271.6	22063.6	20695.1
Jun	A_55_P2158990	16175.1	19490	23612.9	24290.1	20461.2	21450.5	16448.5	25558	20188.4	16177.1	20888.6	17691.1	18419	25165.8	16175.1	21358	21123.7	39373.9	33446.2	32872	22863	24274.1	31187.6	19324.6	22935.1
Jund	A_51_P357744	10644.4	12438	10644.4	10880.1	12277.7	12136.5	10953.5	12892	14381.4	17774.6	14704.1	14521.1	13118.5	19561.3	23201.1	10987.5	12924.7	12355.9	13088.2	11803	13415.5	14636.1	16212.1	17276.6	13729.6
Kank2	A_55_P2167112	13982.1	28326	25848.9	20590.6	20779.2	17958.5	20330.5	18410	19566.4	21651.6	23582.1	24266.1	22878	16018.8	13982.1	17892.5	17080.7	19755.9	18202.7	17913	20106.5	26934.6	26727.6	17398.6	16350.6
Kars	A_55_P2079272	10503.6	17923.5	15444.4	12243.1	19168.7	18507.5	18883.5	28363	21395.4	19248.6	23608.6	15712.1	15864.5	25824.8	20533.1	24021	23441.7	18078.9	16307.7	17722.5	27286.5	14243.1	10503.6	22318.6	23844.1
Kctd14	A_55_P1964364	286093	329776	316311	313740	290138	316547	302278	338055	316826	316783	358253	334191	319728	358024	301396	315650	286093	344570	318392	299398	349702	343050	324266	323718	306968
Kctd9	A_55_P2104597	10383	23334	20503.4	14333.1	15586.7	16699.5	15047.5	19386	14188.4	16576.6	16882.1	12877.1	15097.5	16941.8	16133.1	17113	15261.7	13032.9	14146.2	10383	20181.5	21090.1	15132.6	11225.6	12726.1
Klf6	A_51_P451346	22279.6	43618.5	36533.9	22279.6	32690.7	36011.5	30598.5	34567	24521.4	32174.6	39755.1	28727.1	40200	40758.8	36755.1	34958	29662.7	37140.4	34918.7	26560	41439	27778.1	24302.6	27452.6	25931.1
Klhl22	A_55_P2005285	10090.1	17684	15748.9	10090.1	14786.7	14476	14254.5	29050	18318.9	15323.1	20590.1	19491.6	19356	29244.8	21571.1	17346	19107.2	24315.9	28253.7	25194	28033.5	21287.1	18562.6	21980.6	24482.1
Krtcap2	A_51_P428505	16987.6	27907.5	20414.9	16987.6	30965.7	26843.5	24914.5	36376	28937.9	30881.6	34569.1	28794.1	27963.5	24408.8	27144.6	29295.5	30974.2	30567.4	30428.7	32771.5	28567	28398.6	19349.6	37960.1	34527.1
Lamp1	A_55_P2059342	96821.6	125895	128800	96821.6	138723	125845	131212	139630	129400	135830	159000	126530	130769	122266	98448.1	110745	105889	151795	162619	167232	118022	155290	131989	158281	132913
Larp1	A_55_P1960456	11889.1	17842	20412.9	11889.1	18357.7	18710.5	20177.5	27978.5	18337.4	18780.6	20778.1	17635.6	19178	25334.8	16033.6	26154	27472.7	15748.4	17480.7	14773	30773.5	21102.1	19524.1	24074.6	22479.6
Lasp1	A_52_P1029978	41737.2	66855.5	66281.4	47665.6	41737.2	43711.5	42984	69429.5	56691.4	63893.6	71651.1	52022.6	57929	83012.8	57023.6	77836	75999.7	50934.4	55438.7	59873.5	89017.5	54211.6	45788.6	75817.6	84955.1
Lass5	A_55_P2099930	10339.6	16044	15471.9	10339.6	14860.7	14334	14325.5	18943.5	17312.4	18280.6	18349.6	14559.6	17060	15852.8	18863.1	18320.5	16727.7	16282.9	18698.2	16513.5	21080	16599.1	12072.1	21578.1	20556.6
Ldha	A_55_P2012984	150567	188612	176015	150567	165853	166465	166770	200025	188846	169128	206757	189578	178905	186705	155611	196675	185150	173953	157318	173782	174739	175037	163106	211337	203941
Ldha	A_55_P2141878	15687.6	56509.5	59070.4	15687.6	47706.7	46205.5	37402.5	71415	54997.4	49177.6	82875.1	47152.1	55858	47242.8	39363.1	71627	64867.7	46336.4	40146.2	37552	46136.5	50253.1	46095.6	63856.6	63169.1
Lemd2	A_52_P601914	12245.1	18353	17849.9	12245.1	20005.7	16199.5	15949	26483.5	20845.4	21876.6	22282.6	19266.6	18645.5	25316.3	20774.1	21580	21655.7	18468.9	23819.7	20700.5	25803.5	23101.1	17863.1	32975.6	22206.1
Leprot	A_55_P1980583	11555.7	22190	18556.9	14795.1	20521.2	17353.5	18181.5	15622.5	20638.4	16614.6	18970.1	18902.1	16495.5	17155.8	16863.1	12862	11555.7	23780.9	24130.7	21646	16708	26662.1	22734.1	23097.1	15819.1
Lgals1	A_51_P465281	186194	331061	280467	255923	283082	267057	232480	327551	265047	319663	302514	240825	256809	218432	293478	278191	273989	229106	218967	243741	290555	218594	186194	264726	265384
Litaf	A_51_P267239	14557	26294	24534.4	17299.6	31290.7	30535.5	25050.5	21216	23759.4	15142.6	27877.1	20139.1	22492	43292.8	36698.1	27069	27646.2	14858.9	16693.7	14557	33515.5	30642.1	21373.6	34104.6	35471.1
Lman1	A_52_P652513	10016.6	13934.5	15653.9	10016.6	19905.7	17360	17113.5	23314	20191.9	19195.6	21035.1	18599.1	17914.5	16069.8	16267.1	20930	20389.7	26372.9	26136.7	20214	23108.5	18238.1	15152.6	26053.1	21024.6
Lman2	A_55_P2162592	14578.6	18979	17650.4	14578.6	31364.7	28126	29084.5	30517.5	28981.4	22661.6	29457.6	25943.1	21258.5	28470.8	20728.1	30882.5	32527.7	27838.4	27472.2	32285	28641	20362.6	15331.6	30432.6	31636.1
Lmna	A_52_P137765	39806.6	78270	64417.9	46219.6	70290.7	63009.5	63314	76591.5	65705.4	90324.1	88109.1	54104.1	63493	55499.8	58651.1	75286	74727.2	72306.9	88905.7	83277	69613.5	48468.1	39806.6	53233.6	48420.6
LOC100039181	A_55_P2044592	10811	21441	15005.4	13229.1	12389.7	12473.5	11448.5	17590.5	13088.9	17167.1	15744.1	13260.1	11985	17475.8	18355.6	10811	11250.2	13839.9	11533.7	11366.5	16616	15046.6	11539.6	11685.6	10871.6
LOC100042049	A_55_P2107357	37106.9	68658	37106.9	40285.1	40113.2	38874	42003.5	56262	49961.4	47180.6	62412.6	56130.1	54406	44392.8	37340.6	50457	52124.7	85685.9	52129.2	64956	53087.5	54687.1	41315.6	52451.6	47790.6
LOC100045367	A_55_P2152246	191534	232606	200584	217598	216681	218461	218065	234841	241933	222088	248359	237278	209730	257502	220555	232235	207189	238163	211129	231737	238602	215402	191534	249557	230273
LOC100046223	A_55_P2033666	137151	201959	149134	164166	204787	190083	187048	208549	203094	219253	227107	201937	197557	169508	214248	185758	194584	222398	195919	221471	190252	160132	137151	214237	183021
LOC100046290	A_55_P1953132	20848.1	37662	22868.9	44985.6	38564.7	30456.5	45076.5	33110	58945.9	32915.6	38836.1	62022.1	32060.5	58256.8	29497.6	30270.5	27302.7	36544.9	29632.7	56545.5	30333	32011.1	20848.1	61333.6	44488.1
LOC100048345	A_55_P2032755	18702.6	27553	31563.9	18702.6	45236.2	47113	57632.5	35337	51500.9	26929.1	34079.6	60367.1	36062.5	72837.8	32698.1	26874	32092.7	45152.9	49966.7	69078	43429	30354.1	26532.6	81326.6	41624.1
LOC100502641	A_55_P1995126	164095	219021	185906	206792	224388	205229	218427	224240	241134	220199	241679	247927	194690	262192	219676	228651	197456	238315	211998	225198	229584	203993	164095	247994	213972
LOC100502641	A_55_P2006713	70470.1	126749	94571.9	126657	128159	103430	136845	116164	162747	108475	136701	162287	101668	164742	108727	126755	103043	145015	109073	148585	128546	107865	70470.1	174261	142056
LOC100502683	A_55_P1981274	160884	257454	181375	160884	221958	212938	198837	218558	205819	214334	253178	215651	224018	191576	216279	217217	227541	262527	222565	221089	231794	193826	175093	224294	196771
LOC100503302	A_55_P2010020	74748.1	112691	84730.9	74748.1	103678	98703	88588.5	100901	87103.9	85366.6	118224	100707	102326	85607.8	95383.1	89849.5	92642.2	119060	86835.7	95370	96331	101741	85563.6	83728.1	81079.1
LOC100503563	A_55_P1964985	93424.6	137518	100351	118981	125062	122547	124004	132121	144571	123233	144634	142900	122382	133095	125917	121620	115417	137590	121458	139192	128579	119035	93424.6	149855	134623
LOC100504871	A_55_P2144566	45545.1	67985.5	50164.4	45545.1	65065.7	61598.5	60441	76871	78508.4	57830.1	75936.1	78167.1	61743	78271.8	70166.1	65555	70010.7	72982.9	63971.7	71135	65827.5	56302.1	47482.6	75672.6	65426.6
LOC100504872	A_55_P2172239	101467	146353	110316	113958	124577	120959	132380	151122	145167	114076	167093	150379	133340	164010	143073	124172	119492	149873	124502	138062	154173	136732	101467	143340	149665
LOC100504876	A_55_P2128704	28872.6	39999	32181.4	35153.1	41609.2	39177	46430.5	50367	50063.4	41204.6	49670.1	53297.1	43369	61788.8	46097.6	41927	43564.7	39867.9	39674.7	54320.5	46343.5	40552.1	28872.6	52676.6	54618.6
LOC100504876	A_66_P100601	10225.1	24478.5	20966.9	10225.1	27178.7	24801.5	19353.5	31067.5	19337.4	27398.6	32786.1	20426.1	27295	26548.8	23517.1	26219	27017.7	24459.9	23464.7	22759.5	28936.5	26025.1	18878.6	19403.6	23510.6
LOC100505098	A_55_P2092984	29951.1	69735.5	51887.4	29951.1	58275.7	63913	54994.5	77147	56747.4	59543.6	74905.1	56597.6	63296.5	56617.8	53239.1	67638	66356.2	74090.9	66422.7	61987	69553.5	63832.6	51400.6	61488.6	67860.6
LOC100505283	A_55_P2009267	39628.6	75365	55128.9	39628.6	67016.2	68934	63015.5	81006	67329.4	68605.1	84315.6	77386.6	74650	65973.3	63342.1	62346	67293.7	76310.9	69131.7	77398.5	70971.5	69061.6	55776.6	69863.6	66258.6
LOC434624	A_55_P1983958	12258.1	37211.5	40300.9	12258.1	42650.7	39538.5	30122	54248	30828.4	53917.6	68017.6	41000.1	56176	58117.3	45147.6	58174.5	55685.2	48388.9	53731.7	45380	68482	43185.1	35466.6	39596.1	49550.6
LOC623483	A_55_P1985498	36379.1	53552	38008.4	47056.6	51755.7	53118.5	52590.5	58839	55603.9	47400.6	61613.1	56404.6	49547	57576.3	44456.6	55235	57003.7	59895.4	42113.7	55747.5	54985.5	42967.6	36379.1	62355.6	55484.1
LOC623483	A_55_P1985495	18624.6	32809	22427.9	40618.6	33232.2	28701.5	48963.5	30665	47297.4	25820.6	33844.1	51847.6	28245	54511.8	29701.1	29424	28531.7	33159.4	21254.7	49049	32244.5	26385.1	18624.6	52080.6	51117.1
LOC636187	A_55_P1960621	59126.1	92423	62499.4	79362.6	80988.7	75977.5	99013.5	83021	104564	72759.6	95588.1	107684	83362	89846.8	67845.1	72725	71078.7	87392.4	71455.7	111570	80693.5	75319.1	59126.1	105710	96367.1
LOC636901	A_55_P2017851	28394.6	66734	51089.4	28394.6	86645.7	79309	64840.5	87190	58416.4	75425.6	94265.1	63566.1	72559.5	58198.8	64939.1	77263	80836.7	78039.9	65774.2	69885	74876.5	55563.1	38455.6	81019.6	70398.1
LOC674810	A_55_P2021515	162487	235420	198345	162487	215183	211506	210261	246581	226581	215111	256937	226788	226651	232023	210733	231370	231018	243408	222739	227454	240207	215445	187199	222358	217118
LOC675851	A_55_P2011172	13693.1	23118	15647.4	14732.1	15746.2	15843	19568.5	20280	18555.4	14717.1	18945.1	20343.1	16133	26217.8	14886.1	16068	17521.7	20609.9	16233.7	23476.5	19237.5	16875.1	13693.1	20014.6	21640.1
Loxl1	A_51_P304239	14217.6	20266	18087.4	14217.6	52804.7	51552.5	37185.5	39534	35465.4	46619.1	54204.1	38282.1	44532	19346.3	24722.1	39565	39190.2	30631.9	39738.2	27533	33136.5	44330.1	33650.6	46566.6	37824.1
Lrp1	A_51_P193794	14769.1	20285.5	23195.4	14769.1	19406.2	18676.5	18226.5	25919	24091.4	26356.6	29926.1	16931.6	24928	15962.8	20409.1	23459	20052.7	25701.9	24922.7	19676.5	27189.5	40966.1	36843.6	48352.6	30783.1
Lrrc31	A_55_P2078994	80094.7	103442	97349.9	115413	87524.2	94211	99536.5	114176	113892	91234.6	111516	120030	94185	142415	105995	98774	89182.7	91870.9	80094.7	86883.5	122820	109051	93423.6	112875	110469
Lrrc8a	A_55_P2245920	12895.1	14411.5	14609.4	12895.1	15659.2	14451.5	16660.5	18792.5	21221.4	17510.6	16853.6	17079.6	14733	19762.3	13809.1	18073.5	18400.7	14319.4	16498.7	16682.5	17008.5	19140.1	13828.6	24623.6	21151.6
Lsm4	A_51_P116487	11333.6	20176	15468.9	13484.6	18616.7	18377.5	17656.5	27161	21804.4	17740.1	27328.6	21639.1	19930	23961.8	18497.6	23165.5	24115.7	13889.9	14909.2	17567.5	25496.5	16897.1	11333.6	23798.6	21298.1
Lsm6	A_55_P2025601	12630.6	25108	22163.9	14591.1	20385.7	21306	21523.5	25283	22948.4	19521.6	24137.1	19551.6	20525	29890.3	29664.1	26689	29829.7	20634.9	16563.7	16373	30517	13835.1	12630.6	18066.6	20412.6
Lsm7	A_55_P2003443	14082.1	25629	18500.9	15240.1	19088.7	19371	21098	27996.5	23396.4	23069.1	23950.1	21965.1	19346	28067.8	36066.1	24964	28335.2	28459.9	22846.2	25303.5	33825.5	17903.1	14082.1	21701.6	20767.1
Lsmd1	A_51_P314323	26943.1	46290.5	35069.9	30434.1	38748.7	38201.5	33816	38910.5	37143.4	37663.6	42300.1	34979.6	39209.5	36791.8	38329.1	32925	36450.7	35770.4	34492.7	38084	34254.5	35464.1	26943.1	27881.1	29461.1
Lsp1	A_55_P1957413	11359.1	19767	13607.9	12108.6	21661.7	19586.5	20292.5	28712	24218.4	19124.6	36422.1	22968.1	25067	15144.3	20199.1	19315	19843.2	25806.4	25117.7	24610	28367	19820.1	11359.1	36910.6	43087.6
Luc7l2	A_55_P1953361	25929.1	39809	44053.4	25929.1	62320.7	64755.5	80502.5	49555	69876.9	36843.1	48010.1	80738.1	50281	100021	46731.1	39406.5	42764.7	65324.9	64231.2	89030	62118.5	44245.6	36112.1	105517	58176.1
Luc7l2	A_55_P2409570	14105.2	19095	19972.9	36047.1	14441.2	17463.5	34354	24562	38475.9	14225.6	22310.1	41647.1	19097.5	58977.8	20191.6	18011	15613.7	16410.9	14105.2	23227	33827.5	24785.6	18573.6	45268.6	48490.1
Luzp1	A_55_P2043987	14901.9	18660	24350.9	15103.1	18964.7	20730.5	22200.5	23628	21915.4	23289.6	21255.1	16922.1	20386	21438.3	21430.1	19679.5	18447.7	14901.9	16593.2	16409	26309.5	29176.1	25379.6	21096.1	21292.6
Lxn	A_51_P487813	11544.6	85600	46681.9	53489.1	17849.2	16762.5	14547.5	44830.5	109426	124404	88262.1	56680.1	78025	13284.8	13931.1	17590.5	20150.7	28400.4	32726.7	35496.5	13283.5	60570.1	83141.6	13288.6	11544.6
Maged1	A_51_P174854	13458.8	20228	16625.9	15653.6	19008.7	18259.5	16426	23976.5	19804.4	23531.6	26754.1	19883.1	21579	13458.8	23303.1	19956.5	19965.2	22078.9	24564.2	19669.5	21136.5	19125.1	16333.6	26801.1	23018.1
Maged2	A_55_P2093994	20677.6	51725	41943.9	30245.6	44269.7	39835.5	38925.5	43294	30057.4	39098.6	35262.1	24540.1	28607	23029.8	25097.1	23209	23394.7	37160.9	38934.7	35825	34153	39750.1	51501.6	20677.6	23325.1
Mapksp1	A_55_P2060183	15007.1	26034	26072.9	15007.1	22136.7	25495	24371.5	34701.5	21972.4	21012.6	26349.1	25727.1	24598.5	29521.8	19557.1	23236	22255.2	25420.9	23870.7	23507	30264.5	32586.6	29072.6	26022.6	28194.1
Mbd3	A_66_P127024	17985.6	27120.5	26842.4	17985.6	32218.7	27408.5	25366.5	36314	29979.4	34652.6	36427.1	24833.6	24372	28324.3	29488.1	27212	30437.7	23665.9	23550.7	23321	29457	22524.1	18661.6	27203.6	24190.1
Mcfd2	A_51_P465232	20100.1	42287.5	36055.9	20100.1	58570.2	55758.5	43898.5	68965	49025.4	58417.6	51139.1	38178.1	40432	29781.3	39499.1	52817.5	49602.7	41210.9	41076.2	38106.5	51102	46141.1	31425.6	48148.6	48708.6
Mdh2	A_51_P384879	70425.1	118572	104107	73821.1	97070.2	103814	102177	147238	120748	96235.1	125829	112642	89311	149142	115941	127420	145126	87212.9	91757.2	94783.5	149257	100523	70425.1	122377	133732
Mdm2	A_55_P1975475	16485.7	36563	40870.9	25415.1	25040.7	25387.5	26008	45061	24846.4	25460.1	29474.1	23688.1	22016.5	45287.8	37765.1	19408	16485.7	36359.9	33788.7	26743	45204.5	27033.6	25636.6	17698.6	18297.1
Mesdc2	A_51_P222522	17057.6	26874	20552.9	17057.6	27503.7	23897.5	27733	26186.5	24748.4	20619.1	25790.1	22380.1	20052	26804.8	19393.1	23669	22739.7	27307.4	27608.7	28400	23989.5	28528.1	20489.6	26983.1	26714.6
Mfge8	A_51_P255682	147401	265976	274660	180946	168195	159321	147401	218811	169261	204403	209952	168334	182270	174985	155310	205173	228048	187520	238893	188901	198040	292288	282367	308237	219187
Mfsd2b	A_55_P2159740	64767.7	86706	82911.4	104666	71595.7	78342.5	101100	97896	107725	73524.1	91191.1	114506	76551.5	125767	91745.1	82161	73024.7	74351.4	64767.7	76628.5	108978	93039.1	75185.6	116229	108321
Mgat1	A_55_P2028193	28104.1	38703	43191.9	32401.1	48040.2	50622	54007.5	53513	58063.4	46203.6	50062.1	47735.1	39688	45023.8	28104.1	48532	44412.2	67018.9	67334.2	71933	40695	39272.1	35731.6	53870.6	51161.1
Mia3	A_51_P315085	10275.4	10376.5	10275.4	10400.1	14642.2	10693.5	10509	14870	14734.9	14748.1	15354.1	11373.6	11449	17048.3	16024.1	13463	11081.2	12568.9	13330.7	12002.5	14589.5	18068.1	11891.6	23807.1	16436.1
Mical1	A_55_P2130388	12406.1	27435.5	23372.4	13695.6	18793.7	17398.5	14861	27458	21368.4	24634.1	25150.6	16393.1	21649	13265.8	12406.1	15587.5	14813.7	19956.9	22791.7	17915.5	19050.5	21331.6	19431.6	16493.6	15027.1
Mif	A_55_P2052848	94241.1	130532	111611	105765	104463	107326	101892	165646	146486	94241.1	164058	141167	112974	147810	136710	149380	173457	121425	106969	136521	133915	113805	107022	232028	213573
Mif	A_55_P1994947	64721.6	83859.5	78446.4	67234.1	70950.7	75540	68635.5	118712	92563.9	64721.6	111288	90419.1	79352	103532	98850.1	107396	117264	84485.9	71793.7	90399	92519.5	79574.1	75551.6	155355	138907
Mif	A_55_P2068265	40115	81247	67413.9	52226.1	58684.7	56824.5	40115	99274.5	68978.4	60980.6	100299	62511.6	65186.5	66097.3	87780.1	84806.5	99447.7	72538.9	62425.7	60710	82377.5	69505.1	56869.1	133173	106283
Mlf2	A_55_P1964309	19615.6	29600	26163.4	21265.1	25503.7	24953	26333.5	38649	33065.9	33372.6	34136.1	27344.1	26338	39258.3	42409.1	31133.5	28911.2	21826.9	24841.7	24441	36804	25335.6	19615.6	35009.6	38375.1
Mmadhc	A_55_P2125551	16122.1	25465	23018.4	16122.1	18804.7	20928.5	17290	31775	22862.9	25155.6	24498.1	21751.1	19423	24930.8	16739.1	20399	21518.7	21880.9	22380.2	18240	26684.5	23179.1	17285.1	21412.6	18696.6
Morf4l1	A_55_P1979356	19562.5	31433	21781.9	24109.6	20797.7	19562.5	23336.5	24834.5	26783.4	20433.6	24014.1	24574.1	22994	25915.8	22357.6	21210	19612.7	28773.4	26546.7	25610	24652.5	29241.1	21877.1	29417.6	25376.1
Morf4l2	A_55_P1969882	33144.6	51581	39805.9	37214.1	39284.7	39563.5	36635.5	58824.5	46369.9	48022.6	51456.1	43829.1	45440	48898.8	49896.1	44930	44708.7	50967.9	55805.2	49901	56701.5	45103.1	33144.6	52114.6	51560.1
Mrfap1	A_55_P2053511	35488.1	60888	49446.9	35488.1	44203.2	43525	47837.5	56916	49281.4	37255.6	55069.1	53211.6	47142.5	55155.8	41480.1	49932	49635.7	51741.4	49771.2	53303	58504.5	52668.6	46974.6	51783.6	51224.1
Mrp63	A_52_P528707	17922.1	28596	25643.9	17922.1	25401.7	24071.5	20773	35775	25559.9	27141.6	32269.1	24333.1	24602.5	33068.8	36172.1	29882	32007.2	23596.9	20635.2	24567	33493.5	24438.1	18650.6	25348.1	26820.6
Mrpl11	A_51_P434240	10724.1	15478.5	12517.4	10724.1	14104.7	14245	12475.5	17929	15132.4	12662.6	15795.1	14053.1	13134	19599.8	18189.1	14615	14909.7	13808.9	12592.2	13511	19653	12803.6	11238.6	16626.1	14824.1
Mrpl14	A_51_P192751	15447.1	28529.5	21297.9	15447.1	21020.2	21153	16449	27873.5	17797.9	20363.6	29724.1	17969.1	23591.5	25569.8	27857.6	22819	23934.7	24662.9	22070.7	20989.5	30553.5	26178.6	20692.6	18488.1	19248.1
Mrpl20	A_51_P413698	24599.6	45357.5	35067.9	33569.1	34132.7	35574.5	34837.5	50333.5	38109.4	36538.6	41524.1	34399.6	34235.5	48844.3	48514.1	46216	46151.2	32094.9	28680.2	32286	51122.5	30616.1	24599.6	45284.6	47301.1
Mrpl23	A_55_P2032453	13004.1	17611	13721.4	13004.1	18883.2	18892.5	14750.5	21738	17895.9	16373.6	19749.1	18671.1	19729.5	20572.3	19721.1	19159	23884.2	23821.9	23077.7	22801	19354.5	18723.6	13389.6	22107.1	17850.1
Mrpl33	A_51_P165330	46751.6	71156.5	52325.4	47605.1	53036.7	58568	52935.5	66321.5	57573.4	53329.6	73182.1	62075.6	67284	77028.8	61372.1	61962.5	64300.7	59443.9	53686.7	48715	71367.5	58488.1	46751.6	52064.1	54190.1
Mrpl4	A_55_P2080396	15391.6	19983	21096.9	15391.6	21241.7	20762.5	20546.5	27487	23896.4	23216.1	27140.1	24054.1	23477	23517.3	19211.1	22756.5	23892.2	21472.9	22230.7	23783	24423.5	24493.1	18948.1	23423.6	25679.1
Mrpl43	A_51_P255441	11819.1	19246	15322.9	11819.1	17752.7	19309.5	13272.5	24100.5	15974.9	15538.1	20939.1	16107.1	15733	20077.3	19345.1	21233.5	22083.7	19353.4	18781.7	18411	25093	15886.1	13153.6	19009.1	20171.1
Mrpl51	A_52_P24160	18238.6	30860	23178.9	19724.1	29102.7	30645.5	27287.5	33674.5	29010.4	27119.6	32831.1	30107.1	27256	32445.8	30148.1	28765	31273.7	28070.4	25455.2	24889	35253.5	25714.1	18238.6	28960.6	24008.1
Mrpl52	A_52_P315111	22252.6	43346.5	31106.4	37184.1	33425.7	30766	31313.5	51794	42126.4	38037.1	46316.1	40255.6	33914	42584.8	48362.6	34532.5	39049.7	31519.4	30732.7	40057	46398.5	35773.1	22252.6	38466.6	39133.1
Mrps12	A_51_P506937	10474.6	17249	14894.4	10474.6	18139.2	16673.5	14032.5	18834	14463.4	17701.1	18315.1	13264.6	12916	17822.8	20849.1	15590.5	16420.7	13599.9	13759.7	14932	18881.5	15261.1	10835.6	13444.6	13216.6
Mrps21	A_55_P2126063	16131	28753	20841.9	22841.1	20304.7	19388.5	17462.5	21593	21642.4	19955.1	24617.1	22876.6	20451	21178.8	20174.1	16131	18204.2	25832.9	22975.2	20777	22861	18500.1	17156.6	21939.6	18403.1
Mrps26	A_55_P1992989	10806.6	18882	13715.9	11437.6	18365.2	16184.5	15603.5	27046	19514.4	15472.6	23281.1	18812.1	17488	25603.8	20473.1	23979	27872.7	22086.9	24045.7	27275	26931.5	19804.1	10806.6	24206.6	22960.1
Mrps6	A_52_P58257	10646.6	24395	22290.9	15710.1	17649.7	19157.5	14123.5	18079	16295.4	20509.1	22732.6	17510.1	24306	19181.8	21733.1	16499	16472.7	17005.4	17719.7	13212	23363.5	14879.1	12848.6	10646.6	11443.1
Mrps7	A_55_P1978236	10315.6	19933	16342.9	10731.1	18685.7	18704.5	17113.5	25684	17398.9	16197.6	20724.1	16287.1	16729	22941.8	23203.1	22003	23872.7	15368.4	15066.7	15079	26978	14908.1	10315.6	17342.6	18406.1
Ms4a4c	A_55_P2135980	11649.6	20420	21906.9	11649.6	31887.7	33450.5	41043.5	24738	33820.4	18725.6	23300.1	40625.6	24124	49279.8	22698.1	19563	24161.2	31868.9	35916.7	46086	30821	21868.1	18076.6	54161.1	30119.1
Msn	A_55_P2072373	44196.9	73758	77177.9	70901.1	48090.7	47618.5	51503.5	80141.5	67891.9	64903.6	63199.1	56366.1	54742.5	104423	100231	69742	71842.7	44196.9	49353.7	47948	100257	63650.1	45949.6	69129.6	77967.1
Mtap4	A_55_P2053444	10346.6	14387.5	13719.9	10346.6	11877.2	10931.5	13570	14452	15923.4	13332.6	15014.6	12869.1	13594.5	16741.8	10379.1	11007	11778.7	18631.9	18792.7	19590	14013.5	17604.1	14775.6	16780.6	14582.6
Mtap6	A_55_P1958537	17967.1	52558.5	51815.9	32483.1	40175.2	38689.5	40948	38660.5	28587.4	43587.6	30256.6	28177.6	30369	25960.8	25000.1	29518	28918.7	25903.9	33069.7	32617	30793	44501.1	37331.1	17967.1	26655.1
Mtap7d1	A_55_P1965070	36454.1	54620	53207.9	36454.1	43952.7	43690	43435	64662	66481.4	52401.6	69200.1	50371.1	53334	56753.3	48961.1	59239	58285.7	51133.4	58812.2	56942	72455	56580.6	44808.6	69953.1	67839.6
Mtap7d1	A_55_P2010014	18214.1	25590	24438.9	18214.1	21267.2	19284.5	21173.5	30164	36498.9	23955.1	31377.1	28502.1	24924	31581.8	23835.1	26276.5	24199.2	23479.4	27620.7	27132	34099.5	28187.1	19184.1	38951.1	32796.1
Mtch1	A_55_P2019397	65624.6	106937	110395	65624.6	145412	128442	129735	128172	124128	116792	135864	115872	117925	105917	94800.6	112390	115327	106317	103147	113633	116517	117001	106109	148044	150809
Mtch2	A_55_P2108655	11063.6	22910	17731.9	11063.6	19902.7	19495.5	16987.5	24434.5	17281.4	20268.6	25190.1	19291.1	21819.5	18963.3	21969.6	19789	20401.2	20145.9	21817.7	17783.5	25894.5	24020.6	14879.6	18194.6	16586.1
Mtif2	A_55_P2100550	14756.7	24704	29210.9	28541.1	17795.2	22558.5	24259	25034	23854.9	19617.6	32326.6	32799.1	31736	46865.8	19196.1	18790	14756.7	26247.9	27997.2	18109	41665.5	50430.1	40671.6	28103.6	30567.1
Mybbp1a	A_55_P2152926	10464.1	18320	16837.9	12129.1	14131.7	14741.5	17354.5	29249	21564.9	16306.6	21194.1	17153.1	14172	37479.8	26085.6	25660	26848.2	14940.9	14626.2	14943	35183.5	13391.6	10464.1	23431.1	22894.1
Myeov2	A_55_P2087726	50234.1	86718	65577.4	56503.1	67131.2	78390	71924.5	68051	61722.4	56656.6	73635.1	61140.1	63339	61409.8	59582.6	56700	57077.7	88596.9	51806.7	67453	64536.5	59226.1	62376.1	53602.1	50234.1
Myh9	A_55_P2028600	65354.7	105564	98021.9	77660.1	65354.7	67704	72968.5	109206	106464	106584	110757	93326.1	103602	123982	123945	104312	95691.7	85310.9	90376.7	66858	133170	92126.6	71382.6	116892	105282
Myl6	A_55_P2027969	180039	369148	255480	235615	197835	193620	180039	273734	277833	331429	315635	259545	263820	213610	239225	205382	185918	254074	251468	232154	249953	256476	191892	203348	188473
Myl6	A_55_P2096257	90297.5	188968	142013	111347	106773	106642	90297.5	154340	138377	183965	170025	137547	144534	118150	126359	111376	110265	127681	126916	121405	130100	142809	109336	94103.6	96830.1
Myl9	A_51_P308298	89414.2	400209	332593	303055	89414.2	95223.5	90640.5	330081	285320	331850	335263	276677	297526	151007	193113	219114	195870	169470	197364	194897	212130	337943	292428	187502	196166
Myo9b	A_51_P399985	14674.5	19323.5	19443.9	14843.1	21520.7	17624	14674.5	26557	20608.4	23916.1	25073.6	16001.6	21178.5	28051.8	24378.6	18173	17058.7	22138.9	26123.7	18553	28273.5	31150.6	20829.6	24786.6	20346.6
Naca	A_51_P310030	47365.1	85842.5	58351.9	47365.1	51457.7	52993.5	47511.5	71889.5	64693.4	51907.6	78374.1	63568.1	67535	64699.8	63163.1	62184	54143.2	73189.9	57829.2	62830.5	75050	63448.1	49119.6	58568.6	55824.1
Naip5	A_55_P2014706	13792.1	15713.5	17618.9	17092.1	16006.7	18623	21769.5	20127	21253.9	14844.6	20575.1	26259.1	18872.5	32490.8	13792.1	15888	14336.2	18190.9	18003.7	20696	23333	26227.1	22286.1	23323.1	25378.1
Napa	A_55_P2013716	12578.6	19931	16251.9	12578.6	18578.2	17477	13624	27170	17861.9	20353.6	27216.6	17090.6	19685.5	19565.8	16624.1	20106	21030.7	18360.9	24584.7	21221.5	21679	21901.1	16102.6	23071.6	22888.1
Ncoa5	A_55_P2089462	12021.1	14664	13123.9	12083.1	14313.2	12646.5	16787.5	16517.5	19241.4	14933.1	16879.1	16393.1	13254.5	26266.8	15289.1	15479.5	15150.7	15401.9	17361.7	20607	18337.5	15986.1	12021.1	22430.6	22195.6
Ncor2	A_51_P286814	22026.7	24281	26287.4	22219.1	22026.7	23530.5	23358.5	45611	32293.4	33438.6	37257.1	23576.1	26075	45576.8	49233.1	44214	39375.2	25642.9	32102.2	30894.5	59347.5	34277.1	24518.6	45481.6	50054.1
ND2	A_55_P2039110	51961.5	135420	112292	106299	66254.7	77226	51961.5	126800	99730.9	124826	122501	97892.1	104030	150051	143098	82929	94898.7	130815	116810	110255	131206	110939	111466	67985.1	106041
ND3	A_55_P2132147	36484.5	56715	40387.4	45180.1	43121.7	42489.5	36484.5	58873.5	53586.4	49507.6	56046.1	63930.6	46409	53879.8	44093.6	49973.5	50304.7	63142.4	43754.7	58530	50449	41137.6	42708.6	48892.6	54677.1
ND4	A_51_P245525	28253.5	71416	54088.9	47473.1	38731.7	33940.5	28253.5	57498	45727.4	57892.6	60310.1	47016.1	52507	88006.8	80135.1	37648	38655.2	65962.9	61332.7	62395.5	60250.5	69858.1	55195.6	34977.1	51386.1
Ndor1	A_55_P2082604	146798	183036	186152	196231	160192	178596	166598	192046	180018	174162	209757	210159	185460	224285	170820	171708	146798	205217	186932	163575	205118	221281	197481	190207	183403
Ndufa1	A_52_P139747	20869.6	37639.5	26959.9	26483.1	29861.7	31188.5	27308.5	29913	30271.4	23858.6	33956.1	34211.1	29465	27980.3	20869.6	26689	27193.7	36638.9	30041.7	33061.5	24746.5	30649.6	29279.6	33800.1	27856.1
Ndufa12	A_52_P724940	18559.7	36510	26922.9	24230.1	28009.2	25927	19465.5	36218.5	25221.4	28383.6	32369.1	25378.1	24783	35816.3	38511.1	26123	28741.2	19015.9	18559.7	19585	34703	26403.1	21945.6	25775.6	22405.1
Ndufa13	A_51_P381360	75537.1	133953	103915	75537.1	120847	121998	100027	125180	112640	120375	130524	111364	116662	92792.8	93574.1	95229.5	96543.7	149100	140614	137297	94001	124035	113346	106374	92965.1
Ndufa2	A_51_P384946	42042.6	61511	46704.9	42605.1	58692.7	58874.5	43558	64501	59679.4	58747.1	60882.1	57702.6	57279.5	52050.8	59410.1	54681.5	57096.7	70979.9	56470.7	50709	50989	54475.1	49287.6	57039.6	42042.6
Ndufa3	A_55_P2184128	43586	76576	57333.9	52421.6	53282.7	53664.5	47094	65877.5	48838.9	64841.1	68440.1	52514.6	55387	52805.8	63690.1	43586	51544.7	67189.4	66415.2	66842.5	57142.5	60967.6	50046.1	51055.6	51331.1
Ndufa4	A_52_P552832	12326	26867	15697.4	19353.1	14083.7	15935.5	12625.5	19825	15452.4	15516.1	21448.1	18922.6	18538	16116.3	17974.6	12326	16002.7	21556.4	19776.7	16817.5	19960	21027.1	14549.1	14680.6	14868.1
Ndufa5	A_55_P2027698	22441.1	43864	32334.4	22441.1	38446.7	39313.5	34997	39610.5	36368.4	37235.6	40860.1	39404.1	34761.5	36513.8	38477.1	39343	44314.7	46355.4	33419.7	33916	37126	30990.1	26494.6	36272.1	30177.1
Ndufa7	A_52_P347591	22758.5	46090.5	31874.4	30138.1	26238.7	26599.5	22758.5	38705	33790.4	36754.6	39952.1	31287.1	32643.5	32980.8	40543.6	26247.5	27323.7	46717.9	38782.2	38835.5	37043.5	40393.1	30787.6	38367.6	32583.6
Ndufb10	A_51_P516615	28329.1	43184	34971.4	28329.1	34576.7	36216.5	28498.5	41865.5	30862.4	33995.6	42523.6	34041.1	36061	34658.3	41578.1	36186	38340.7	36112.9	35212.7	34373	38082.5	34907.1	30659.1	35666.6	32999.6
Ndufb11	A_55_P1980566	33239.1	51999	41457.9	33239.1	43141.7	44017.5	44999.5	54659.5	48763.4	44667.1	54115.1	50081.1	44953	44668.3	36746.6	41693	48276.2	63115.9	52916.2	57560	44444.5	47925.1	44158.6	46404.6	44550.6
Ndufb11	A_55_P2012206	26693.1	46996	33420.4	26693.1	35778.2	34257.5	31459.5	41450.5	37480.4	35939.6	44691.1	40016.1	34798	33549.8	30213.1	31983	36195.7	52863.9	40544.2	42170	35722.5	36323.6	33405.1	37965.6	33212.1
Ndufb3	A_51_P160744	12091.6	25899	17827.9	12091.6	21519.7	19887.5	16371	21548	14846.4	16875.6	21427.1	17131.1	16902	23050.8	19286.1	16266.5	16618.2	22360.4	17110.7	18536.5	19107	21518.1	17756.6	14477.1	15147.1
Ndufb4	A_55_P1965539	22011.5	37223	27107.4	24977.1	25615.7	26743.5	22011.5	31730.5	24792.4	24767.6	31832.6	23673.6	26723	32040.8	29462.1	25223.5	24773.7	34854.9	26553.2	28674	31516	30431.6	22523.6	24166.1	25670.1
Ndufb4	A_66_P123527	11062.6	18930	13276.9	15614.6	12766.2	13313	13920.5	15715.5	16703.4	13049.1	15930.1	15618.1	13225	20052.8	15300.6	12632	12309.2	17511.9	13303.7	17447	15252.5	15237.1	11062.6	15215.6	14443.1
Ndufb6	A_52_P210338	10256.6	20036	15130.9	11131.1	12529.2	12819	10619.5	18767	12856.4	13926.6	19356.1	14072.6	15788	17592.3	14297.1	12104.5	12458.7	13685.9	11526.7	12784	16843.5	14576.6	10256.6	11714.6	12702.6
Ndufb7	A_51_P519276	34053.1	54972	45388.4	35402.6	46605.2	46563.5	38769.5	52496.5	43280.4	53166.6	51919.1	35423.1	45048	43205.8	50289.1	41526	42504.7	44620.4	43615.7	43766	43002	43112.1	35921.1	35043.6	34053.1
Ndufb8	A_51_P247873	17834.1	35540.5	27831.9	17834.1	36336.7	34255.5	28868.5	42790	28992.4	35824.6	40497.1	24752.6	31218.5	33574.3	34728.1	36188	34358.7	33580.4	30970.7	32329.5	37406	30145.6	19502.6	26069.6	29953.6
Ndufb9	A_51_P177552	27682	44809	35817.9	29586.1	31862.7	33252.5	27682	42352	35472.9	34203.1	44793.6	38464.1	38426	40931.3	36164.6	37737	38912.2	48211.4	43808.7	45978	42098.5	39955.6	34110.6	42312.1	35744.1
Ndufc1	A_52_P254795	23818.7	33063	28260.9	27284.6	27410.7	27129.5	26008.5	33300	31826.9	26480.6	33362.1	33657.1	27397	36460.8	29182.6	27635	29586.7	33429.4	23818.7	33418	28745.5	30374.1	25506.1	35557.6	32983.6
Ndufc2	A_55_P2061809	15584.6	25111	18781.4	15584.6	20022.7	19843.5	18497.5	25589	19360.4	20926.1	22732.1	20132.6	19355	27236.8	20159.1	19900	20330.7	25280.4	19718.7	24477	23664.5	20931.1	16748.1	20896.1	22812.6
Ndufs3	A_55_P2106834	17164.1	24839.5	18540.9	17164.1	24125.7	21939	19024.5	25132.5	21373.4	20206.6	24242.1	21300.1	20557	25313.8	25424.1	21039.5	23899.7	25819.9	25794.7	25244	24534	23603.1	19405.1	23655.6	22894.1
Ndufs4	A_51_P388696	11406.7	18706	12329.9	13042.1	11406.7	12167	11606.5	15605	14520.4	14286.6	15500.6	13405.1	12566	16883.8	14507.6	12394	12166.7	16377.9	13161.7	13544	13888	14028.1	11634.1	15044.6	12164.6
Ndufs5	A_55_P2029750	29986	48064	35310.9	30530.1	36101.2	34444	32627.5	41755.5	36555.4	35129.6	37313.1	33620.1	29986	37487.8	35975.6	34675	34026.2	38655.4	30751.7	35392	38674.5	34432.6	31055.6	38740.6	38678.6
Ndufs6	A_55_P1964867	30949.1	53922.5	39542.4	30949.1	44092.7	45473	41130.5	50918	43518.4	42371.6	51767.1	48195.1	42058.5	52654.8	49034.6	40185	45725.2	49923.9	38784.2	48109.5	47629.5	44020.1	38171.6	50602.6	47429.6
Ndufs7	A_55_P1974273	17039.1	27991	20453.9	17039.1	24302.2	21689.5	20564.5	31143	24364.9	24260.6	33860.1	24301.1	25395	29474.3	30279.1	26063	30729.2	26363.4	28303.7	28599.5	30556.5	26423.1	17953.6	22610.6	22348.6
Ndufv1	A_55_P2079054	16689.6	36073	30463.9	16689.6	35262.7	31528.5	30366.5	43202	38217.4	32297.1	44656.1	34645.1	35849	41795.8	32802.6	38592	40436.7	35186.9	43317.7	39281	42013	36221.1	27352.1	38835.6	36058.1
Ndufv2	A_55_P2119478	12661.5	23863	16750.9	17653.1	14422.7	13446.5	12661.5	19650.5	20919.4	16648.6	19995.1	20047.1	15399	19782.8	16730.1	16456	14936.2	18060.9	14984.7	15643	19290	18890.1	13350.1	17465.6	16108.6
Ndufv3	A_55_P2184180	23596.1	49286	35200.9	34505.1	38365.7	38392.5	30875.5	51551.5	38368.4	39463.6	59485.1	51476.1	45273	32259.3	23596.1	33428.5	36658.7	61884.4	47249.7	52622	28399	49454.1	49306.6	52159.6	47140.6
Nedd4	A_52_P648424	14536.5	28981	23730.9	20733.1	16384.7	15679	14536.5	23431	21334.4	32458.6	29205.1	20424.6	27051	17520.3	23999.1	16619.5	14698.7	28406.9	28945.7	23905.5	21525.5	36681.6	28266.6	22689.6	18942.6
Nenf	A_55_P1989452	15044.1	21621	15578.9	15044.1	23525.2	22095	21417.5	25741.5	22220.4	26151.6	26925.1	23806.6	26113.5	16942.3	16607.6	17509	17450.7	33228.9	38604.2	39141	17634.5	34742.1	26657.6	25082.6	18208.1
Nfic	A_55_P2122334	11217	11217	12235.4	13075.1	20190.2	19210	20889.5	17638.5	20396.9	17269.6	17949.1	20209.1	17131.5	15267.3	13624.1	15506	16135.7	13324.9	12090.7	11804	14676	17171.1	13907.6	19486.6	17590.1
Nid1	A_55_P2084308	14331.7	26693	25588.9	21786.1	27721.2	27022.5	32492	29176.5	29560.4	31528.6	32163.6	27735.1	16502.5	22233.8	28262.1	15112	14331.7	16218.9	18547.7	20008	36246	34306.1	23370.6	20271.6	20851.1
Nisch	A_51_P355413	49930.1	92976.5	87728.9	49930.1	78366.7	81288.5	81681.5	112718	97641.9	74477.6	112375	96515.1	95792	102053	63605.6	79255	80542.2	96401.9	106746	99555	101201	110603	114607	103376	98834.1
Nme2	A_55_P2016959	124076	210913	166963	141757	175672	170716	155623	218739	163283	186606	215070	171640	175961	200012	206841	194342	197395	216730	192924	202975	227984	166320	124076	173334	191238
Nme2	A_55_P1984422	57089.1	102345	79295.9	84914.6	87904.7	85928.5	93095.5	103785	99876.9	83953.6	101792	101468	82493	113714	93241.1	97403	93148.2	107315	87942.7	111161	108676	78853.1	57089.1	100701	98415.1
Nono	A_55_P1957927	16781.6	34191	28005.9	16781.6	26887.7	23259.5	25914.5	32383	27771.9	24350.6	33336.6	28331.1	28870	40956.8	31433.1	30082.5	29633.7	29062.4	30378.7	25879	41844.5	28362.6	23964.1	31055.1	30729.1
Nono	A_55_P2062622	15505.1	25704.5	19050.9	15505.1	19447.7	17911.5	23637	22936	24539.4	17626.6	23425.1	25927.1	21495	38718.3	24523.6	21246	20466.7	20834.4	22127.7	23849.5	29438.5	19245.1	16518.1	26082.6	27902.6
Npm1	A_55_P1954965	48330.6	87242	58926.9	51881.1	54748.7	55486.5	63021	95222.5	75850.4	66646.6	84810.6	72457.1	70195	103980	104965	86886	87744.2	79584.9	78088.7	75164	109999	64731.1	48330.6	76359.6	73670.1
Npm1	A_51_P467410	38632.6	69844.5	45686.4	40800.1	47048.2	46271	60564.5	76367	77583.4	47465.6	65201.6	74045.1	54170	101192	78871.1	72484	68082.7	64977.9	51116.7	67755	93955	46732.6	38632.6	72760.6	76170.6
Npm1	A_66_P129873	26126.1	62474.5	40914.9	26126.1	40183.7	39920	40429	70135.5	49593.9	46993.1	61754.1	48061.1	49137	72756.3	71018.1	64083.5	57888.7	53658.9	49744.7	48937	83532	45201.1	34689.6	46575.6	51739.1
Nptn	A_55_P2171463	27529.1	47528.5	41238.9	29396.1	31911.7	31404	32408.5	41939	45482.9	43991.1	45883.1	38502.6	41830	35474.3	27529.1	31348	30258.7	39994.4	42020.7	41522	33349.5	48557.1	41082.6	37199.6	35904.6
Nsfl1c	A_55_P2078940	13783.1	26098	19880.9	13783.1	18126.7	18986.5	20157.5	28167	23007.4	22457.6	22786.6	20707.6	17008	25856.8	22722.1	19048.5	19586.7	21608.9	19230.2	20274.5	30290.5	17838.1	14719.1	20476.6	21526.1
Nt5c	A_55_P2038162	12739.5	18319	14667.4	15743.1	17899.7	13900.5	12739.5	21226	18235.9	15712.1	18912.1	17259.1	15054	27451.8	19657.1	15666	15661.7	18813.9	18346.7	22741	17254	22455.1	14337.1	18364.1	18227.1
Nucb1	A_51_P433733	11113.1	20172	17932.9	11113.1	24392.2	20131	16865.5	25838	17233.9	31251.1	33910.1	19660.1	26191	15816.3	17071.1	17772	16203.2	27880.4	39244.7	27094.5	19961.5	29061.1	25110.6	22143.6	18453.1
Nudcd3	A_55_P2121344	12993.7	23163	20401.9	13011.1	12993.7	14561.5	14227	19850	17557.9	16765.6	20130.1	16013.6	19164	21206.3	16639.1	16910	15675.7	19780.4	20371.2	17944	21051	22823.1	21463.6	16741.6	16208.1
Nudt3	A_55_P2091691	16763.5	31144	28059.9	20506.1	18987.7	16763.5	18790.5	28734.5	30545.9	24956.6	27420.1	23963.1	21088	27034.8	24350.1	25946	26865.7	22782.4	22470.2	21513	31249	23305.1	19344.6	34096.6	23063.1
Nutf2	A_55_P1999847	15704.6	26057.5	23333.9	21793.1	21668.7	23210.5	20515.5	31718	26621.4	25929.6	28080.6	25603.1	24994	34272.8	37444.1	25632	28982.7	19998.9	17161.7	19590.5	34746	19106.6	15704.6	24175.6	24407.6
Nxf1	A_66_P127567	13354.1	19345	17806.9	13354.1	16039.2	19402.5	15759	24292	20407.9	16853.6	23746.1	18969.1	19059.5	23424.8	22659.1	19246	20411.7	19888.9	21485.7	15766	29363.5	19060.1	17594.6	21490.1	22269.1
Oaz1	A_55_P2035454	60869.1	95527	81361.9	60869.1	82977.7	74833.5	76121	100951	87432.9	90862.6	107003	95536.6	92599.5	77317.8	73888.1	82573	97402.7	92377.9	101444	109453	83764	85190.1	79682.6	87664.1	79752.6
Oaz2-ps	A_55_P1993599	29303.1	45970	43404.9	29303.1	43665.7	41703	36658	55482	49155.4	32239.6	50268.6	57566.1	47076	52905.3	33793.1	34112	35581.2	58314.9	56288.7	54713	43599.5	53105.6	51791.1	46145.6	39457.1
Ogdh	A_55_P2006280	10161	14593	14947.4	10770.1	13063.7	11173.5	12358.5	14728	11319.9	14881.6	14542.1	11004.6	11862.5	17380.3	14307.1	13219	12579.2	10409.9	11776.7	10161	16456.5	12148.1	10792.6	12257.6	11447.1
Ogfr	A_55_P1956827	12706.6	20054	16771.9	12706.6	34407.2	34398.5	35726.5	25865	21816.4	18873.1	22790.1	21786.1	18823	19813.8	17152.1	19063.5	18126.7	28950.4	29116.2	29455	23100.5	22724.1	16820.1	30110.6	26759.1
ORF61	A_55_P1975326	16424.1	23557	21944.9	18550.6	23011.2	19527.5	27034.5	26123	35353.9	22422.1	29747.1	29891.1	20603	27971.8	16424.1	22128	20980.7	19982.9	22294.7	25502.5	22294.5	22796.1	19147.6	32937.1	30710.6
Osbpl5	A_55_P2023484	15015.6	40027	39994.4	15960.1	34460.2	31907.5	33073.5	34057	28538.4	33318.6	36331.1	29438.6	35578	22897.3	15015.6	23853.5	21717.2	35284.9	38274.2	34906.5	30143.5	45966.1	41574.1	21337.1	25344.1
P4hb	A_51_P311990	16273.1	24749	23786.4	16273.1	31333.7	26169.5	28670.5	37234.5	36078.4	35043.6	38055.1	29576.1	24471	27141.3	25535.1	32155	29748.7	32922.4	33564.7	34175	29724	26143.1	22772.6	49024.6	44667.1
Pabpc1	A_66_P115406	58512.1	75030.5	71883.9	58512.1	74461.2	81429.5	64404	120455	91681.4	81623.1	108934	88883.1	88048	95254.8	83017.1	98101	100167	82912.4	90539.7	86329	113077	80997.6	63519.6	109667	97490.1
Pabpn1	A_55_P2064442	23792	41710.5	31770.9	26634.6	26761.7	28116.5	27212.5	38985	32993.4	33400.6	37176.1	31170.6	26518	48706.8	47689.1	38559	35439.7	28081.9	24664.2	23792	46806	29550.6	27646.6	32823.6	35817.1
Pacsin2	A_66_P113487	12435.6	30477	27961.9	17943.1	19259.7	17724.5	16883	30783	19554.9	21749.6	24067.1	21257.1	19410	25417.8	22430.1	18735	17239.7	16800.9	17927.7	14301	29783.5	25446.6	20422.6	12435.6	17750.1
Pafah1b1	A_55_P1992769	14389.6	22485	20450.4	14389.6	21641.7	19319	19563.5	28739	22256.9	25904.1	26155.1	17983.1	20752.5	26100.8	30480.1	21796	21754.7	17357.9	16600.2	16640	30129.5	19891.1	14489.6	25107.6	23238.1
Pak4	A_55_P2117731	10909.1	18146	19069.4	10909.1	31639.7	30638	37315.5	21637	29262.4	16271.6	21436.1	35945.1	21637.5	49557.8	22289.6	17459.5	20357.2	27088.4	31319.7	44068	27295.5	21453.1	15981.6	47839.6	26631.1
Pam16	A_55_P2166543	14339.1	25347	18345.9	14884.6	14548.7	15600.5	14714.5	22866	17220.4	18124.6	19882.1	14339.1	15627.5	20833.8	24634.6	21095	23208.7	22286.4	19823.7	22808.5	25826	19629.1	15124.1	20858.6	23749.1
Park7	A_55_P2141429	20122.1	41674	30759.9	20122.1	37346.2	32354.5	24085.5	42794	28438.4	39985.6	45030.1	30109.6	35734	35738.8	34430.1	27162	28505.7	38963.9	39955.7	34738	31730.5	39276.6	29887.6	33862.6	23671.1
Park7	A_55_P1981550	14192.1	33973	24964.9	14192.1	31781.7	27842.5	22665.5	35427	23900.4	32264.1	37729.6	28489.1	28674	32612.3	26342.6	22547.5	23316.7	33122.9	33669.7	31285	25091	31511.1	23936.6	28657.1	20508.1
Pbld1	A_55_P1956063	190939	212756	197953	218080	198391	204010	197803	219223	217878	213057	229186	220504	199159	244232	197706	206073	190939	207992	190973	191543	213339	215031	195387	222264	208345
Pbxip1	A_55_P2093874	23100.1	51589	52962.9	36620.6	34761.7	32532.5	31613.5	59842	52115.9	67441.6	64198.1	48779.6	49392	30524.8	23100.1	39191	34590.7	61931.4	70171.7	67637.5	26227.5	86680.1	71099.6	54454.1	50644.6
Pbxip1	A_55_P2128734	19046.1	48469.5	45098.9	31298.1	31190.7	27659.5	24541	51860.5	40900.4	60299.1	58248.1	39195.1	43149	21449.8	19046.1	34801.5	28964.7	55260.4	61250.7	54641	23099	74784.1	61779.1	49380.6	38587.6
Pcbp1	A_55_P1980326	21896.1	34153.5	33291.9	21896.1	36482.7	31350.5	41049.5	37954	40305.4	33287.1	35288.1	39195.1	28739	50606.3	27787.1	33954.5	34319.7	33547.9	30943.7	34695	39778.5	25527.1	24405.6	35461.1	37086.6
Pcbp2	A_55_P1980316	14146.1	17760	16947.9	14146.1	18050.7	16530.5	22371.5	20742	23676.4	20739.6	22716.1	22141.1	21175	26531.3	24357.1	18982	20064.7	18888.9	16654.7	18805	23730.5	16615.1	14391.6	23090.6	24155.1
Pcdhga9	A_55_P1961863	16049.8	24270	22752.9	17419.1	44493.2	46142.5	47339.5	23836	29568.9	40530.6	38159.6	35719.6	42069.5	16049.8	21608.6	22781	20126.7	38107.9	42126.7	41827	24926	36775.1	45226.6	38595.6	30329.1
Pcolce	A_55_P2020577	79932.8	176399	163597	139910	204773	198503	182794	153896	165862	195427	221574	185692	199650	79932.8	113066	200235	193903	254641	251470	251282	129166	208297	207564	238149	213294
Pdap1	A_51_P202430	22210.1	33032	37065.9	27012.6	38256.7	37614.5	35657	55087.5	39184.4	44319.6	42190.1	37241.1	33042.5	60557.3	57571.1	47655.5	45395.7	28669.4	23583.7	25963.5	50890.5	27794.1	22210.1	39714.1	42597.1
Pdcd5	A_55_P2034555	24788.6	34551.5	33114.4	30416.6	32828.7	33632	31239.5	45175.5	36683.4	37307.6	43087.1	35605.1	36776	45114.3	47591.1	41216.5	37300.2	35115.9	29539.2	32828.5	51795.5	32453.1	24788.6	36872.6	38355.1
Pde4c	A_55_P1973779	11465.7	22200	21950.9	41806.1	14640.7	16742	40614	23085	43817.4	12950.1	21206.1	46371.1	17885	69136.8	21925.1	17461	14710.7	13176.9	11465.7	22189	36649.5	24431.1	20788.1	43789.6	49993.1
Pdia3	A_66_P129730	14858.5	18855	16836.9	15943.1	18963.7	19343	14858.5	23634	16090.9	26256.6	24236.6	20165.1	18507	16236.3	21096.6	22117	22038.7	25509.9	20730.7	21888	22486	18272.1	18333.6	15783.6	16188.6
Pdia6	A_55_P2053491	75133.1	120849	95015.9	75133.1	128818	121087	134284	132822	134160	112299	140542	124157	113753	134622	92147.1	126374	121155	131633	139457	130260	134504	86593.1	80195.6	128541	137455
Pdrg1	A_51_P173961	29374.5	60124.5	46595.9	31553.1	33239.7	30901.5	29374.5	45053	38195.4	45821.6	38273.1	32159.1	31418	36515.8	40450.1	46682	48097.2	50026.4	50700.7	46264	48386.5	40421.1	31855.6	36294.1	35675.1
Pebp1	A_55_P2183672	82225.5	105893	88849.4	114460	87968.7	82225.5	103176	89406	110274	92718.1	96967.6	105698	89807	108223	82518.1	85391	88273.2	90190.4	95165.7	117112	88725.5	87601.1	83264.6	110232	110408
Pebp1	A_51_P171697	32433.1	56688	55808.9	32433.1	42906.7	40656.5	35589	54179	52304.4	50379.6	62042.6	47584.1	48892.5	48857.8	44089.6	46732	43738.7	46726.9	46473.7	43309	48923.5	47578.6	50266.1	55576.6	46814.1
Pgk1	A_65_P03442	47970.1	86178	86121.9	47970.1	59541.7	59280.5	57575	93303	95346.4	70070.6	120675	77598.1	74009	79852.3	68869.1	73297	66544.7	71706.4	57791.7	67502	68632.5	74346.1	72559.6	120303	105911
Pgs1	A_55_P2002150	11545.1	22810	25511.9	11545.1	22877.7	22635	21490.5	26687	25646.4	15903.1	25736.6	18212.6	19347	31322.3	26040.1	34765	35511.7	19725.4	22573.7	18916.5	38015.5	20687.1	20464.1	34043.6	28458.1
Phlda3	A_51_P329928	38591.1	86735.5	77006.9	55434.1	75015.2	71625.5	72880	75173.5	76837.4	81235.6	66497.1	58118.1	61874	55677.3	62947.6	49104	53547.7	74723.9	93273.7	90257	73467.5	74069.6	75384.6	40041.6	38591.1
Phldb1	A_55_P1981155	16662.5	31507.5	30773.9	18389.1	18334.7	16662.5	18285.5	22915	23450.9	20129.6	22047.1	19013.1	18080	37849.3	24886.6	22374	21704.2	22482.4	26102.2	22573	40270.5	21625.6	19859.6	19202.6	22366.6
Pi4ka	A_52_P454994	11968.1	17384	20089.4	11968.1	21224.7	21709	23651.5	21892	21072.9	17722.1	22759.1	20560.1	22859.5	20341.8	16821.1	23170	22219.7	22970.9	24531.7	25181	22746.5	24869.1	23415.6	23404.6	23027.1
Pitpna	A_55_P2166773	16349.5	42151	32097.4	29722.1	18115.2	16349.5	16409.5	37480	32995.4	37558.6	38033.1	27962.1	32980	30493.8	29835.1	27609	27622.7	22209.4	24953.7	25982	32153.5	31625.6	19841.1	19722.1	23847.6
Pkm2	A_55_P2060107	52391.1	87042.5	89394.4	52391.1	66487.7	67174.5	53429.5	119249	90933.4	90176.1	123977	64938.6	74634	78096.8	104187	99174.5	92004.7	89852.9	93718.7	75566	103501	72504.1	62762.1	109009	99566.1
Plec	A_55_P2139027	24461.2	48895.5	55657.9	41064.1	24461.2	25966.5	26920	51571	43553.9	59713.6	60930.6	35834.1	54657	49966.3	53403.1	54673	44674.7	37715.9	53317.7	37873.5	58821	64797.1	51339.1	42042.6	42008.1
Plekhg2	A_55_P2050877	20239.7	41791	35739.9	24007.6	33300.7	30032.5	30768.5	26273	32218.4	34295.1	35081.6	25363.1	30890	28454.8	21335.1	21767	20239.7	23966.9	28657.2	20872.5	33881.5	39999.1	41554.1	21454.6	25252.6
Plekho2	A_55_P1963868	12752.8	22678	20962.9	16178.1	18122.7	17624.5	18753	23276	28030.9	31757.6	32637.1	26482.1	28344	12752.8	12927.1	14615	15140.7	22093.9	28683.2	24453.5	14315.5	27958.1	18724.6	17497.6	16363.1
Plxnb2	A_55_P1967266	20232.5	32232	30151.9	24588.1	33141.7	28573	31632.5	43387	40703.9	47882.6	41572.1	34099.6	30444	36549.8	28865.1	20232.5	20302.7	28906.4	36797.2	34729	32468.5	37158.6	30817.6	32033.1	27633.6
Pmm1	A_55_P1972720	16290.2	28492.5	26471.9	18994.6	37942.7	32142.5	27431	39020.5	22463.4	26802.6	27457.1	25553.1	23651	28308.8	26533.6	16654	16290.2	29737.9	30355.7	31217.5	24199	32359.1	27252.1	22166.6	17983.6
Pnp	A_66_P138137	10523.1	19160.5	17150.4	10523.1	51663.7	46924.5	37447	30910	28547.4	29861.6	39106.1	25707.1	30137.5	18206.3	18756.1	22549	20428.7	27092.9	24913.7	24019.5	22459	33771.1	19412.6	24139.6	21399.1
Poldip3	A_55_P2131875	13540.1	20572.5	18751.4	13540.1	20937.7	18550.5	18249	22978	22841.4	19770.1	21953.1	19544.1	18671	25596.3	24394.1	19253.5	18780.2	23076.9	28052.7	23823.5	23731.5	20822.1	17966.6	24254.1	19728.1
Polr2g	A_51_P367843	13821.1	28115	21820.9	13821.1	16191.7	17131	16417.5	32371	21277.4	18404.6	22668.6	21107.1	18008	32420.8	26768.1	20084	21908.7	22006.9	19674.2	19935	33348	19878.1	15918.6	26672.6	26415.1
Polr2l	A_55_P1956517	58835.1	162334	119402	112380	96792.7	100211	87744.5	98838	96870.4	99246.6	112466	88881.6	81401	87925.8	98503.1	73148.5	89083.7	80675.4	71630.7	85808	86671.5	78719.1	65650.6	58835.1	61456.6
Pomp	A_55_P1995623	12035.6	21524.5	15998.4	14977.1	15870.2	15891.5	17398	18215.5	18643.4	16150.6	17686.1	17212.1	14433	22635.8	19811.1	15598	15921.7	18258.9	16084.7	18551	18881.5	14375.1	12035.6	17575.6	17760.6
Ppib	A_51_P327828	27158.9	38527.5	27158.9	28424.1	35369.7	32631.5	33559.5	36168.5	33049.4	38874.1	38569.1	32735.6	32685	29153.8	32844.6	33309.5	35198.7	48894.9	50772.2	51047	36004.5	38248.1	29833.6	44497.6	46708.6
Ppic	A_51_P161086	25042.6	43274	29582.4	25042.6	38298.7	37190.5	34103.5	49772	34728.9	45954.6	42998.1	40139.1	48240	36878.8	26007.1	37686	36454.7	40481.4	46733.7	37380	40446	58971.6	45241.6	38368.6	35803.1
Ppp1ca	A_55_P2039439	53425.6	79735.5	78894.4	53425.6	90198.7	85951.5	81008.5	101159	91511.9	93631.6	104440	77162.6	85269	89715.8	90465.1	87810	87245.2	79690.9	81676.7	80386.5	96910.5	69082.1	54721.6	85533.6	87452.1
Ppp1r14b	A_55_P2109263	17030.1	41413	35322.4	26376.1	34630.7	33434.5	33736	41781	39152.9	44076.1	45272.1	33309.6	34990	41605.3	53012.1	42309	41854.7	24253.4	22931.7	24571	52191.5	20549.1	17030.1	37107.6	34100.1
Ppp1r14b	A_55_P1984751	10392.6	23980	21627.4	17585.1	21993.2	20024.5	23046.5	26213	26922.9	27985.6	27520.1	22811.6	22179	28513.8	33772.1	26228.5	25596.7	14722.9	13620.7	16315.5	31674.5	12962.6	10392.6	25224.6	23204.1
Prdx2	A_55_P1979432	26732.6	54507	39249.4	30168.6	35904.7	34073.5	32799.5	41283	36796.4	35069.1	43704.6	35092.6	35500	44238.8	34517.1	33545	35532.7	32766.4	30984.7	35129	42669.5	30728.1	26732.6	39544.6	38548.1
Prdx5	A_55_P1979463	16101.1	28640	23728.4	16101.1	43943.7	41003	29252.5	32097	27879.9	34699.6	39257.1	22971.1	27532	30508.8	43984.6	31484	32515.7	31236.4	31299.7	25743	28754.5	27152.1	20844.6	33343.6	34775.1
Prelid1	A_55_P2008347	47699.1	79183	65693.9	59256.1	83964.7	70471.5	75537.5	83597	96459.4	83099.6	95416.1	84557.1	75604.5	92566.3	95308.6	75488	74489.2	65148.9	69794.2	84041	71983	67458.1	47699.1	87438.6	84894.1
Prelid1	A_55_P2061874	27243.6	45316	37040.9	34637.1	48147.7	39126	46830	47830.5	58687.4	46553.6	55586.1	51195.6	42725	50616.8	51766.1	42197	44871.7	36567.4	40555.2	51304.5	41854	38757.1	27243.6	52101.6	50400.1
Prelid1	A_55_P2008349	27001.1	44165.5	44155.4	27001.1	53051.7	49246.5	38647.5	58485	48731.4	57339.6	64909.1	42196.1	51850	37249.8	54389.1	50379.5	52356.7	37726.9	42022.7	42173	44953.5	39310.1	33558.6	46048.6	45380.1
Prkar1a	A_55_P2020786	19475.9	24919	25107.4	22295.1	31921.7	30975.5	30827.5	30818	31977.4	28947.1	25807.6	25617.1	22585.5	30505.8	23348.1	28167	28053.2	19475.9	19653.7	23642	28739	21763.6	21168.1	36644.6	35917.1
Prkcsh	A_55_P2035892	43840.1	66525	64058.4	43840.1	71298.7	68537.5	61527	93071	71469.4	78631.6	84795.6	62621.6	59546	74661.3	80004.1	78377	82733.7	75954.9	99684.2	84068.5	92099	76449.1	60018.1	84001.1	91934.6
Prorsd1	A_55_P2169621	28750.6	32395.5	33508.9	30678.1	35696.2	39619.5	42738.5	43858.5	40574.9	32459.6	41742.1	50058.1	36486	56285.8	28750.6	35420	33093.7	40266.9	35041.2	42464	45426.5	49644.6	43094.1	42863.6	46142.1
Prpf8	A_55_P1997751	38534.1	55964	55201.4	38534.1	56153.7	58055	73334.5	73082	77412.9	50281.6	69059.1	63879.6	56736.5	99809.8	59681.1	68660	68385.7	63649.4	59786.2	62517	91925.5	58429.6	49111.1	67602.6	77208.1
Prpsap1	A_55_P2144666	23230.9	40694	37117.9	24969.1	31849.7	33116.5	25474.5	39447.5	26191.4	27413.6	39970.1	29670.1	36642	38012.3	31344.6	31953	35652.2	23230.9	31197.2	25753	38848	44791.1	43145.1	25187.6	29626.6
Prpsap1	A_55_P2069832	20490.9	37445	29503.4	24133.6	26834.7	26560.5	27037.5	33368	27956.4	23283.6	34384.1	29942.1	31477.5	39184.8	26164.1	25823	27971.7	20490.9	26641.2	26101	34341.5	39283.1	36171.1	28528.1	30576.1
Psenen	A_55_P1987770	12227.6	17594.5	14244.9	12227.6	17639.2	18212.5	14305	20484	18042.9	21868.6	24104.1	18417.1	17643	16191.8	19206.1	13857	15770.7	22258.4	19570.2	20559.5	16222.5	15721.1	12786.6	17240.6	16251.6
Psenen	A_55_P1980302	10530.4	15013	10530.4	12243.1	13329.2	13993.5	12962.5	15755	17389.4	16366.6	17993.1	17983.1	14120	15053.8	14516.1	11031	12925.7	17441.9	15485.2	18736	12489.5	11859.1	10568.6	17756.6	15076.1
Psma1	A_51_P469578	11555.1	25682	16458.9	11555.1	16381.7	16360.5	14644.5	19919.5	14940.4	15489.6	19315.1	15640.1	16887	25133.8	24018.1	15772	17631.7	16168.4	14468.7	12696.5	28104	17844.1	14273.6	13147.1	15287.1
Psma2	A_51_P415945	35801.6	67187	47432.9	35801.6	51309.7	49135.5	44185.5	56295.5	45113.4	44718.1	55744.1	46036.6	43397.5	66289.8	59593.6	52751	54335.7	52158.9	45300.2	46053.5	71160	47880.1	36520.1	48560.1	51405.6
Psma3	A_55_P1952127	33656.6	57539	44739.9	33656.6	38683.2	40096	38908.5	52624	41974.9	42676.1	53909.6	41894.1	46224.5	64744.8	58269.1	45747	48679.2	43994.9	38023.7	35822	61319	49302.1	38232.1	36802.6	41782.1
Psma5	A_55_P2176345	13574.1	21282.5	15517.9	14467.1	16263.7	16903	15522.5	22532	17248.4	15368.6	20986.1	16957.1	16224	24825.8	18976.6	20152	21753.7	21071.9	15724.7	15743	28447.5	16887.6	13574.1	18946.6	18958.6
Psma7	A_51_P233603	22822.2	39832	32409.4	27465.1	28902.2	30041.5	31082.5	41797	33939.9	27206.6	38844.6	32288.6	29138.5	57314.8	33892.1	36899	36536.7	25721.9	22822.2	26328	50437	31171.6	23717.6	37325.6	40554.1
Psmb3	A_52_P9437	37399.6	64021	51344.4	37399.6	54701.7	55417.5	49115.5	61273	47210.4	55665.6	56193.1	38372.6	42459	53349.8	69480.6	54881	62152.7	44070.9	42123.7	42230.5	73647.5	47030.1	38967.1	49161.6	52427.1
Psmb4	A_51_P155522	37736.1	62921	46228.9	37736.1	63881.2	59384.5	48035.5	63852	55659.4	49958.6	62700.6	50352.1	47796	48706.8	54498.1	57037	57298.7	53269.4	50134.2	43612	64994.5	51402.1	41791.1	67331.1	49227.1
Psmb5	A_55_P2144850	64105.1	110011	88173.9	64105.1	95668.7	93243	85322.5	119415	93382.9	88026.6	106845	89608.1	84561	122326	117306	109033	118319	81300.9	76432.2	91056	132438	85566.6	66356.1	105239	104265
Psmb5	A_55_P2115068	10448.1	22295	17003.4	10448.1	17702.7	17401.5	12193.5	23188.5	16533.4	20013.6	21317.6	13926.1	15429	19413.8	27227.1	21952	19818.2	15826.9	15557.7	13528	25570.5	16412.6	12295.1	19042.6	17528.1
Psmb6	A_55_P2035657	45691.6	83850.5	63487.9	45691.6	70153.7	67407	62112	85905	64625.9	63973.1	76812.1	58797.1	59555.5	73625.8	75483.1	64722	66185.7	69960.9	55268.7	59469	81155.5	58290.1	46407.6	62332.6	55759.6
Psmc1	A_55_P2033863	38643.1	67280	63475.4	38643.1	57429.7	60357	52636.5	75268.5	52180.4	63733.6	70214.1	49138.6	52413	67449.3	73665.1	62032.5	66608.7	49208.9	53425.7	43736	92386	55263.1	48107.1	55445.1	52634.1
Psmc2	A_55_P2103422	25338.1	40294.5	30843.4	25338.1	34256.7	37796.5	34408.5	42410.5	34946.4	29211.6	39263.1	34897.1	31746.5	45511.3	32141.1	39024	38880.7	31312.9	30418.7	31322.5	48522.5	32608.6	26849.6	36380.1	38891.6
Psmc2	A_55_P2051874	22913.1	35225	30346.4	22913.1	32083.7	34761.5	36593.5	43326	32899.9	27564.6	36989.6	31421.6	28897	42114.3	28726.1	36165	36038.7	30145.9	28123.7	32515	46783.5	29270.1	24665.6	35559.1	39610.1
Psmc3	A_55_P2103429	62911.1	127210	101316	62911.1	119903	118812	111366	121777	101349	95102.6	128049	98369.6	107302	121747	112774	112180	109540	102250	101358	97254.5	144377	94371.6	77228.6	96360.6	100593
Psmc3	A_55_P2121961	15045.1	36749	30897.4	15045.1	40066.2	35056.5	30519	38089.5	28807.4	34881.1	41256.1	25880.1	32138	37763.8	34288.1	33229	31457.7	29554.4	30158.2	24848.5	42265.5	29478.1	23333.6	28967.6	25880.1
Psmd1	A_55_P2061591	13848.6	22098	18387.9	15686.1	18877.7	19452.5	21343.5	22960	20318.4	18281.6	22034.1	19937.6	17566	29406.3	21859.6	21566	20321.7	16750.9	15979.7	16970	31761	17617.1	13848.6	21459.6	23628.1
Psmd12	A_52_P574190	13484	27361	22030.9	15224.1	21312.2	21239.5	16165.5	30374	20378.9	20376.6	25673.1	17878.6	19656	24795.3	28112.1	24719.5	23746.7	17977.9	19380.7	13484	37425.5	21506.1	15426.6	19030.1	18377.1
Psmd2	A_55_P2022987	15350.1	27266.5	20986.9	17938.1	21736.7	23533.5	22088.5	29034	25218.4	24762.6	27405.6	21038.1	21061	28661.8	34103.6	24796.5	24518.2	18199.9	20198.7	22244	34265.5	19223.1	15350.1	30284.6	27886.1
Psmd3	A_51_P130427	33905.1	48997	47048.9	33905.1	58263.2	52810	47536	70142.5	56728.4	49668.1	63076.6	46691.1	41067.5	70402.3	70273.1	59108	68167.2	40078.4	41853.7	41878	81341.5	46906.6	34530.6	49025.1	47998.6
Psmd4	A_55_P1990894	28398.1	46059.5	38148.9	28398.1	43068.7	43922.5	37686.5	54393	41609.9	39792.6	48435.1	38265.1	38665	52479.3	42809.1	44447.5	44575.7	36636.9	34448.2	34817	55741.5	37769.1	32308.6	48709.6	45086.6
Psme2	A_55_P1996862	19662.1	28052	20941.9	19662.1	42332.2	39257	39547.5	25184	31264.4	22194.1	32410.1	32513.1	25339	33177.8	23615.1	20455	21105.7	41199.9	32901.2	40093	23072.5	30077.1	22595.6	30400.1	25907.1
Ptges3	A_55_P1994355	13890.6	24987.5	21873.4	18361.1	22935.7	21375.5	25578.5	28299	24477.4	24178.1	24649.1	22506.6	22065	30552.3	37945.1	30714.5	32059.7	18994.9	19989.7	19262.5	40087.5	21241.1	13890.6	25089.6	27623.1
Ptma	A_55_P1957219	15857.6	28594	20771.9	27657.1	19266.7	19691.5	20465	28354.5	28919.4	19243.6	28128.1	29598.1	23740	44280.8	39320.1	31640	30427.7	30216.9	29731.7	27452.5	38939.5	19711.1	15857.6	35313.6	33375.1
Ptms	A_55_P2162965	24217.5	33953	32266.9	28525.6	32156.2	24217.5	28274	31525	38834.9	49008.6	43705.1	34768.6	36284	35625.3	31832.1	30901.5	30310.7	29553.9	33783.2	35937	30252.5	34600.1	27215.1	48436.6	41843.6
Ptp4a1	A_55_P1990780	16182.1	25182	25056.9	16866.6	18863.7	18977.5	20391.5	19646	22972.4	18776.1	22529.1	18118.6	21346	38215.3	29303.1	21087	21664.7	18862.4	18804.2	16638	33789.5	18807.6	16859.6	16182.1	17510.6
Ptp4a2	A_52_P276607	12458	23228	20381.9	21075.1	18185.7	17748.5	15499	26270	23200.4	22181.6	23947.1	21922.6	22151	18925.8	24365.6	21343.5	21061.7	15547.4	14376.2	12458	27382.5	20212.1	13651.6	26288.6	20045.1
Ptpn11	A_51_P173622	21640.5	39951	38985.4	24830.1	30097.7	32058.5	28380	34611	32786.4	26154.6	30116.6	25845.1	26029.5	32487.8	32159.1	30699	28994.7	25088.4	23149.7	21640.5	39154	37022.1	30680.6	34592.6	31310.1
Pxdn	A_55_P2104327	13133.5	24669	24344.9	17551.1	24127.7	18612.5	21503.5	29849	30564.9	27300.6	21234.1	18220.1	16985	34664.3	17517.1	16015	14788.7	13270.9	14937.2	13133.5	26012.5	28291.1	23738.6	29747.1	28970.6
Qars	A_51_P287232	11836.1	20341	18449.4	11836.1	20151.7	18676.5	16825.5	25093	19454.9	19083.1	25021.1	16403.1	20409.5	28079.8	23923.1	24029.5	22770.2	19910.9	24862.7	22410	28956	21085.1	17355.1	21527.6	24480.6
Rab1	A_55_P1979281	14986.1	26156	19807.4	14986.1	18508.2	17460.5	17897.5	25443	20694.4	19357.6	22920.1	19206.1	18360	25006.3	22504.1	19618	16786.7	17760.9	19408.7	17497.5	25814.5	21253.1	15751.6	20513.6	21976.6
Rab14	A_55_P2014041	10032.6	16504.5	13366.9	10032.6	11760.7	12039.5	13714.5	14748	15680.4	11905.6	14503.6	14517.6	12808	16743.8	10773.1	12864	12168.7	15255.9	15166.7	15115	16030.5	14432.1	11918.6	14828.6	15910.1
Rab34	A_55_P1956672	12459.1	19068	15404.9	12459.1	18847.2	15531.5	19030.5	21834	22116.9	17865.1	24748.6	24332.6	20027.5	16619.8	13352.6	20005	21048.2	21939.4	23822.7	28492	19159.5	25336.1	20388.6	28868.1	26884.6
Rabac1	A_55_P1955227	25662.6	41802	33077.9	27347.6	40220.7	37730	37229.5	35936	38160.4	42141.6	41748.1	40711.1	37100.5	33131.8	25662.6	33410	33516.7	49621.9	46229.7	53876	27219.5	46906.1	39686.6	46065.6	42684.1
Rac1	A_55_P2076489	12400.6	22430	20896.4	20596.1	28873.7	28452	27308.5	30652	27578.9	29190.6	33097.1	25475.1	26763	25320.8	28306.1	25833	27716.7	18656.9	21196.7	20790.5	31561.5	19367.1	12400.6	22866.6	26780.1
Rac1	A_51_P513254	10985.1	17507	16763.9	10985.1	15219.7	16240.5	11424.5	19351.5	16381.9	25241.6	21747.6	15412.1	18384	13821.8	20560.6	15036	15514.2	16485.9	18596.7	15568.5	18179	17418.6	13940.6	14426.6	13003.1
Ran	A_55_P2037116	59319.6	123109	102491	80135.1	114379	118828	123877	158396	127074	98705.1	135792	121173	110430	162129	132327	151691	148514	88319.9	80933.7	86369.5	173081	86933.1	59319.6	117894	131198
Rasl2-9-ps	A_55_P2119030	15606.1	43365	34958.9	15606.1	35716.7	34379.5	35956.5	57489	32812.4	39655.6	51345.1	31378.1	37122	53391.8	49493.1	53717	47452.2	27892.9	27157.7	25915	70334.5	32746.1	18991.6	33864.6	42197.1
Rbbp4	A_51_P307325	13436.6	23390	20820.4	13436.6	23919.2	23475	21719.5	24047	20274.4	21510.6	22717.1	17798.1	21358	27435.3	30543.6	23754.5	22777.7	23114.9	22065.2	16555	30326.5	18722.1	16644.6	23067.6	20343.6
Rbbp7	A_55_P2123822	18610.7	30029.5	25057.9	20237.1	21534.2	20053.5	24113	30926.5	27751.4	22234.1	31325.6	30854.6	27992.5	33061.3	21944.1	26839	26337.2	21201.4	18610.7	21829.5	29594	28191.1	20431.6	21520.6	26145.1
Rbm3	A_51_P262340	22429.6	37770	27629.9	23933.1	31928.7	32147.5	32990	37086.5	35617.4	34240.1	40345.1	28634.1	32852	43735.8	45401.1	38856	36664.7	31146.9	27662.7	25994.5	41013.5	30178.1	22429.6	36038.6	31492.1
Rbm3	A_55_P2117525	10014.1	21809	15213.4	10014.1	19041.7	17730.5	15631.5	21086	17663.4	19829.6	21737.6	16701.1	20140	28662.8	26197.1	22333	23399.7	18244.9	18859.2	17673.5	24885	19468.1	12542.6	16176.6	16474.6
Rbm39	A_55_P2000823	14488.6	18610	17386.9	14488.6	15384.7	16344	16436.5	22700.5	20653.4	15161.6	22532.1	20992.1	20558	24008.8	16054.1	17367	16333.2	24226.9	22885.7	19267.5	24182.5	22117.6	22565.6	21259.1	19122.1
Rbm42	A_55_P1959313	21936.1	27901	24724.9	21936.1	26096.7	24034.5	22073.5	30622	26591.4	28438.1	30457.1	22141.1	24771.5	27815.8	28505.6	24533	27114.2	24690.9	29903.7	28706	31504.5	26230.1	22507.1	28487.6	26533.1
Rbx1	A_52_P437230	28706.6	41370	32527.4	30404.1	33480.7	37532	30548.5	41640	39371.4	37812.6	39217.1	36695.1	35185	39636.8	43098.1	31818	35364.2	40739.9	35317.7	39476	37358.5	31730.6	28706.6	39398.6	34518.1
Rbx1	A_55_P2038121	22291.6	41040	29681.4	22291.6	33450.2	36184	28611.5	40027.5	32289.4	35970.6	38496.1	31151.1	34109.5	35642.8	42980.1	32719.5	33453.7	37293.9	33556.7	33973	36699	30701.1	27232.1	32565.6	32186.1
Rcn3	A_55_P2046393	53014.8	107831	81029.4	79049.1	97469.7	85947.5	85922.5	119819	114554	123882	124167	109728	103719	53014.8	76435.1	103659	109754	128505	134188	130886	87836.5	114393	107433	125566	113173
Rela	A_55_P1974288	14684.1	27044	25637.4	14684.1	33071.2	30906.5	27778.5	32975	34131.4	26805.1	34930.6	29345.1	31518	32433.8	22110.1	30067	32144.7	28774.9	34243.2	30037.5	32759.5	31332.1	24865.6	34247.6	30560.1
Rer1	A_51_P512002	15542.1	22727	21338.9	15542.1	23228.7	21434.5	20572.5	25409	22273.9	23188.6	26371.6	23223.1	22032	21134.8	20329.1	23278	23126.2	23251.9	24479.7	23952	26447	21110.1	16585.6	26270.6	22626.1
Rhoa	A_55_P2008081	16524.6	34207.5	26562.9	25592.1	24475.7	21598	28529.5	25804	32351.4	30313.6	29746.1	26117.1	25974.5	29688.8	25685.1	22801	21294.7	22026.9	22571.2	25079	28152.5	25142.1	16524.6	28478.6	26082.1
Rhoc	A_51_P282508	84623.1	113822	126472	102106	152506	162725	148711	193873	160290	136805	159937	151192	146695	175737	194226	148972	147927	104087	95422.7	99897	195715	114715	84623.1	155678	163852
Rhoc	A_55_P1979684	24295.1	41210.5	39449.4	25591.6	45735.2	43448.5	36672	55644	40074.9	50312.6	48690.1	33455.1	41319.5	41863.3	62508.1	38572	43638.7	28116.4	30508.2	24985.5	60761.5	34454.6	24295.1	38574.1	42599.6
Rhox8	A_55_P1981829	11439	23070	29717.9	46663.6	19608.2	19314.5	19624.5	19907.5	25236.4	13553.6	25142.6	30906.1	34657.5	57776.3	54500.1	14840	12764.7	18936.4	20012.7	11439	46901.5	49861.6	39953.1	21941.6	17107.1
Rit1	A_51_P236175	14274.1	26161.5	21494.9	16731.6	18337.7	16983.5	20252.5	20763.5	25234.4	21124.1	22460.1	20041.1	20134	17621.3	14274.1	17954.5	16090.7	21898.9	19555.2	25176	19605.5	25999.1	21493.1	26139.6	25156.1
Rnaseh2c	A_51_P417469	15782.1	25139	19606.9	15782.1	24420.7	22423.5	19174.5	25396	26010.4	20286.6	28379.1	24562.1	23467.5	25885.3	26130.1	24219	27584.7	17961.9	16532.7	19447	25070.5	18920.1	17448.6	22567.6	18363.1
Rnaset2a	A_55_P2040371	10555.7	17352.5	11801.9	10950.1	15630.7	13474.5	15756.5	13361	13439.4	10766.6	12219.1	13210.1	10873	22305.3	12265.6	12680	11591.7	10875.9	10555.7	11786	14037.5	19827.6	18624.6	21823.6	20340.1
Rnf187	A_51_P518298	10271.1	15795	14398.9	10271.1	18957.7	15694	15262.5	19497	17860.4	17075.6	19451.6	16643.6	15333	25187.3	20684.6	18831	19158.7	15539.9	18946.7	18939	20273.5	17586.1	13670.6	19234.1	16613.1
Rnf26	A_55_P1962641	15827.1	24595.5	23312.9	15827.1	32049.7	30830	30158.5	32107	33356.4	26909.6	35011.1	28925.6	31316	30572.8	28423.1	34856	36875.7	25224.9	29926.7	26809	40245.5	24132.1	20202.6	33889.6	33550.1
Rnf6	A_65_P01641	14160.6	18194	18020.9	14160.6	18271.7	22190	19505.5	23793	21562.4	17901.6	23847.1	23695.6	20049	23390.3	20183.1	21328	20521.7	21761.9	18930.7	20357	21939.5	19184.1	17414.6	24036.6	24393.1
Romo1	A_55_P1989276	37943.5	54577.5	44530.9	38561.1	41123.7	41512.5	37943.5	48068.5	44365.9	48765.6	52521.6	40796.1	42479	45894.3	47921.1	38244	39239.7	46416.9	38613.2	43626	45807.5	44272.1	44482.6	41963.6	39426.6
Romo1	A_55_P1980341	31247.5	45892.5	36060.9	31476.1	32072.7	35232	32404.5	42852.5	38030.4	42396.1	41309.1	38293.6	34965.5	39944.3	40035.1	31247.5	34552.7	39547.4	33789.7	39133.5	38351.5	37009.1	36034.6	37669.6	36597.6
Romo1	A_55_P2114467	23350	33347	28615.4	23603.1	26014.7	28379.5	23350	32594	27090.9	31627.6	32999.1	24697.1	28699	28192.8	32303.1	24528	24843.7	28846.9	25681.7	28685	28958.5	28511.6	30291.6	26670.1	26091.6
Rpl10	A_55_P1968729	200841	260543	217573	217657	228881	211403	208722	239935	236094	254004	254290	233363	228291	249770	229451	223984	200841	247600	241211	232055	251919	242828	202741	234610	212122
Rpl10	A_55_P2142191	172920	210816	181108	182499	188618	175948	181078	205983	201399	217799	218560	197020	190717	217261	188891	189213	173828	202088	198369	196197	200596	202016	172920	201710	187397
Rpl10a	A_55_P2101906	169213	241665	179456	169213	218222	213980	207358	263293	217700	225258	280025	237311	238210	218982	194399	231546	245735	276967	251526	284645	233148	222169	179425	234259	237653
Rpl10a	A_55_P1981499	116475	175570	117960	117866	155600	148378	149681	192844	164648	164996	199299	177699	161856	178878	142706	164033	175851	211672	183163	221258	155985	157730	116475	179891	181125
Rpl11	A_55_P1967076	191114	302933	229302	191114	270892	276311	245739	290609	246163	245877	314173	250987	269314	243599	234237	272199	275810	299668	250321	264504	287137	254932	232082	243428	244583
Rpl11	A_55_P2010341	81777.6	130687	89947.9	83762.1	116099	110555	107526	118732	114073	100247	129129	109277	104821	108706	102748	113792	103251	131509	100863	113712	125137	103491	81777.6	109423	104576
Rpl11	A_55_P2139673	40694.1	66487	45612.9	61810.6	59038.2	52901.5	77119	58591	84502.4	51868.1	65688.6	82013.6	49987	81679.8	51087.1	57033.5	51684.2	64684.4	49079.7	78613	62375	53461.6	40694.1	79221.6	74300.1
Rpl12	A_55_P1954907	139658	216084	168601	150817	179676	189265	179377	226233	200090	182731	250337	201814	205070	207639	221387	202807	203318	215579	165755	187515	231387	179049	139658	209027	206895
Rpl12	A_55_P1952690	60755.1	119156	92503.9	60755.1	106639	109970	91164.5	137696	98190.4	109550	145329	102754	122929	111247	136406	120730	123737	130330	97514.2	94708	136988	106062	80114.1	97909.6	111636
Rpl12-ps1	A_55_P2026156	14501.6	24938	18600.9	20422.1	28451.7	21887.5	27800.5	28282	29850.4	21866.6	31170.6	31214.1	24422.5	48718.3	33460.6	25387	22720.2	26566.9	19522.7	29665	30416.5	28975.1	14501.6	31015.1	33333.1
Rpl13	A_55_P2009588	135721	197920	157885	135721	196834	194649	179779	218900	187957	199057	232056	194967	201754	174736	178150	202237	206478	221536	188747	207093	194369	178890	149437	203909	186372
Rpl13	A_55_P2011235	86346.1	122234	96185.9	86346.1	123846	115712	112275	129401	118350	115759	149637	123315	119799	110955	92045.1	120821	119406	134944	110295	137729	118507	116685	90199.6	126318	125066
Rpl13	A_55_P2032558	37639.6	73800	55311.9	37639.6	75098.7	75577.5	64833	86494	67938.4	76528.6	93652.1	68916.1	78891	66654.8	64368.6	77255	79827.7	83785.4	70839.7	78043	73228.5	65450.1	55764.6	75881.6	70563.6
Rpl13	A_55_P1991151	13573.6	22122	15155.9	33813.1	23248.7	17483.5	41176.5	21083	43133.9	17408.1	23822.1	43407.1	20231.5	48134.8	17550.1	21061	17520.7	23652.9	15537.7	47446	19809	19814.1	13573.6	49543.1	46328.1
Rpl13a	A_55_P2058953	68411.6	93539.5	70698.9	79691.6	88352.7	82395	87359	95437	92804.4	82573.6	102225	94425.1	83161	90918.8	81237.1	89349	75251.2	102585	76761.7	103916	93724.5	91760.1	68411.6	109680	101493
Rpl13a	A_55_P2101910	20899.1	34512	29205.9	20899.1	32514.2	31530.5	30882.5	49946	33363.4	35701.6	45735.1	31976.6	33002.5	37698.8	43244.1	41520	39484.2	37899.9	28542.7	29784	46302.5	28950.1	23224.6	44851.6	48330.1
Rpl14	A_55_P2070913	177025	227205	197241	180155	206983	227527	206343	258435	213980	191506	264736	242185	246021	253468	222904	265359	239753	261081	211013	237435	276301	227193	177025	237580	249158
Rpl14	A_55_P2137461	44984.1	73149.5	58593.9	64310.1	67819.2	62244.5	70669.5	77322	76840.4	57013.1	80546.1	90046.1	69502	103390	69968.6	77108	71646.7	77310.9	61496.7	82316	87387	74778.6	44984.1	87245.1	95330.1
Rpl15	A_55_P1990457	97842.5	149570	115987	99395.1	131281	134483	97842.5	162211	125396	141887	171061	126721	141937	125488	147245	136839	138867	142516	132680	115031	151199	137421	106179	128854	118584
Rpl17	A_55_P2011674	65430.6	102467	82865.9	65430.6	92506.7	84122.5	89908.5	114208	92324.9	105812	129666	104592	101904	104615	113404	90169	93446.7	123789	97214.2	124607	120062	116314	76760.6	106836	104373
Rpl17	A_55_P1954896	56976.6	83095	62776.4	56976.6	71868.7	73965.5	70478.5	90133	70448.4	78615.6	100378	78850.1	87392.5	79827.3	83986.1	72587.5	73203.2	95456.4	73803.7	95815	88675	85705.1	65163.6	84417.6	86568.1
Rpl17	A_55_P1978615	33425.1	63307.5	48557.4	33425.1	54891.2	58686.5	53289	71036	52568.9	60397.6	79138.1	61517.1	69295	62047.8	65967.1	56135	60424.7	76287.9	63789.7	77026.5	70409.5	69786.1	51854.6	61275.1	66399.1
Rpl17	A_55_P2061135	25708.1	36723.5	25891.9	25708.1	30230.7	31493.5	33915.5	39427	32434.4	33459.6	43659.1	38722.1	37694	37311.3	34944.1	30654	32322.7	40942.9	32262.7	46111	37286.5	37534.1	27468.6	40858.6	41020.1
Rpl17	A_55_P2181084	12671.9	17748	12671.9	28263.1	17917.7	15256.5	30818	17596	31004.4	14971.6	18536.1	35152.1	17183	38164.3	16317.1	16237	14560.7	20113.9	12956.7	38353	17036.5	18995.1	13194.6	37443.6	35656.1
Rpl17-ps1	A_55_P2086087	17322.6	28650	19276.9	17322.6	23009.7	22386	29278.5	27858	28861.9	24156.1	34067.6	33578.1	26945	35070.8	26921.1	23233.5	22708.7	31222.9	24128.7	42281	30263.5	29802.6	19300.6	34565.6	36645.1
Rpl18	A_55_P2128225	76045.1	119092	86886.9	80193.6	111984	107537	94266.5	133454	109968	108326	141836	104322	110734	107400	127032	121162	128290	116714	110386	115145	137948	107453	76045.1	131012	118679
Rpl18a	A_55_P2158351	45281.6	95828	64553.9	45281.6	99324.2	91397.5	91925.5	104416	92808.4	95348.6	108112	98286.1	87685	80804.8	89642.1	98465.5	101350	113708	98851.7	111149	87211	85708.6	67242.1	98779.6	97105.6
Rpl19	A_55_P2152245	100928	189848	153795	100928	172628	185131	145213	217548	159215	176943	211677	168331	188165	164211	170229	198541	188871	214308	190579	180703	201035	180705	148727	174122	172567
Rpl21-ps4	A_55_P2002079	43587.1	66328	47484.9	43587.1	60418.7	61336.5	73005	68975	72750.4	61132.6	74963.1	77928.6	65300	74384.8	57742.1	58360	57579.7	67201.9	59681.7	83246	62069.5	60309.1	47535.1	72199.1	73479.6
Rpl21-ps5	A_55_P2050298	43042.6	73819	57450.9	43042.6	69257.7	65713.5	65498.5	78294.5	66937.9	70075.6	85401.1	73594.1	74164	60741.3	62470.6	64866	67200.2	76029.9	67512.7	72168	70276.5	69101.1	55360.6	67350.6	63905.1
Rpl22	A_55_P2015989	90990.6	141419	102536	109015	128693	129997	122243	145486	121311	110883	146158	141037	124817	124904	111616	138699	139126	146480	98772.2	114655	141345	104357	90990.6	128055	127948
Rpl22l1	A_55_P2159026	43492.1	82652	44643.4	43492.1	46629.7	49148	43880	69067	53860.4	55075.6	73690.1	64892.1	67157	49460.8	44362.1	60477	63228.7	102522	64775.7	74396	65400.5	68811.1	51140.6	52675.1	51699.1
Rpl23	A_55_P2029344	163549	212764	167577	174806	192329	181613	192854	193358	214467	195271	215303	217867	184154	222405	179179	191757	172580	223596	212366	212701	202661	196217	163549	219703	198614
Rpl23	A_55_P1961235	96216.6	121887	99076.4	107463	108492	111918	124507	124909	131857	114263	129992	137174	103728	134190	110142	120466	106951	130222	108979	131098	119472	110722	96216.6	137443	129536
Rpl23a	A_55_P2109874	70567.1	110833	82540.4	70567.1	96607.7	100289	83342.5	112407	90005.4	108227	117293	99594.6	99528	91531.3	99052.1	93976.5	99347.2	120784	110887	120750	106801	101685	86119.6	101789	96336.1
Rpl23a	A_55_P2109875	21899.1	46403	29789.9	21899.1	35703.7	35826	27585.5	40913	30964.4	43010.6	43904.6	33840.1	38842.5	32186.3	37762.1	34547	33519.7	47286.9	45294.7	44366	40839	39704.1	29493.1	33829.6	32583.1
Rpl23a-ps1	A_66_P107353	48221.6	72364.5	48681.9	64676.1	62691.7	55882.5	72279	66053	75367.4	60152.1	74201.6	83663.1	61271	72624.3	55179.1	55209.5	55397.7	77991.4	68686.7	103608	63607.5	63239.6	48221.6	85980.6	81025.1
Rpl24	A_55_P1956938	189941	263750	195129	189941	217936	213752	214121	246755	236002	217375	262676	235550	218653	243484	245179	223558	223049	257791	221744	234941	254946	222442	196931	237661	218850
Rpl24	A_55_P2059556	102496	159465	110973	107854	121630	118100	116523	144226	136940	122517	152711	142645	129124	140417	146742	127113	124864	151917	127812	135301	145196	130324	102496	132729	118577
Rpl24	A_55_P2004333	54057.9	80824	54057.9	57207.6	66679.7	67550	68724.5	79917	70633.9	66817.6	86208.1	74779.1	69623	83288.8	83541.1	68333.5	69988.2	86491.9	70242.7	83774	73964	74043.1	57215.1	76064.6	75040.1
Rpl26	A_55_P2178525	78015.1	131814	88697.9	78015.1	102362	106333	88535.5	117643	93909.9	101958	127128	104796	104801	105173	106608	100146	99776.7	133120	94690.7	97262.5	114083	108177	84629.6	100596	100652
Rpl26	A_55_P2080907	53802.1	108144	79239.9	53802.1	87543.7	93318.5	69233	104824	77667.9	92678.6	111689	82491.1	100006	87195.8	94093.1	87863	90633.2	115411	89680.7	76182	103429	92021.6	78077.6	77407.1	78242.6
Rpl26	A_55_P2156409	16703.1	33530	23085.4	16703.1	29084.7	32008.5	25202.5	34838	26929.4	28583.6	37803.6	32496.1	26994	27780.8	23698.1	28706.5	30557.7	38043.9	20585.7	21974.5	28225	23276.1	20918.6	27333.6	27105.1
Rpl26-ps4	A_55_P2068566	20075.6	31656	20919.4	20236.1	25570.2	24967.5	22109.5	27364	24689.4	24342.6	31779.1	26317.1	25424.5	28536.3	27774.1	23170	22411.7	32553.9	22286.7	22985	28292.5	26641.1	20075.6	25754.6	23946.1
Rpl27	A_55_P1956948	104934	153842	112825	116374	134459	135488	150637	146128	136486	131107	149432	139033	127698	160049	134524	135237	140592	150659	116620	140972	150204	115102	104934	138975	141238
Rpl27	A_55_P2048684	28245.1	72948.5	50049.9	28245.1	60597.7	59649.5	47416.5	73989	42318.4	62938.1	73903.6	48884.6	60217	57304.8	56358.1	62881	68677.2	66340.9	52403.7	54613.5	73577.5	60008.6	45414.1	46355.6	52754.1
Rpl27a	A_55_P2048671	90566.1	129082	102498	96974.1	125577	124026	122984	146489	138820	121150	163838	136244	132590	138525	140226	133182	140602	155635	135032	161687	144432	118300	90566.1	150296	143366
Rpl27a	A_55_P2065327	68261.1	115699	93839.9	68261.1	118415	117556	96849.5	134332	111399	119120	148862	111356	126108	102466	118104	121938	126605	145765	130771	126246	127017	110095	83391.6	116461	110839
Rpl27a	A_51_P132459	12938.1	22275	17646.4	12938.1	20802.2	19024.5	16171.5	23962	18467.9	19885.6	27023.1	23429.1	26269	19118.8	17207.6	21200.5	22361.7	31538.9	33267.7	29539.5	19799.5	22300.1	16870.6	22002.6	18837.1
Rpl28	A_55_P2044109	110601	172034	122525	110601	166123	153945	143090	171395	149880	165268	193093	154348	164693	132185	165715	153806	162790	175025	170232	179058	158516	145916	117441	166483	150810
Rpl28	A_55_P1985359	39239.1	96413.5	73726.4	39239.1	104457	94917.5	83545.5	108996	88645.4	102418	122804	86524.1	104899	80896.3	99585.1	96748.5	104083	113638	113929	106135	99420.5	95877.6	74510.1	85571.6	86595.1
Rpl29	A_55_P1996509	174573	249371	195481	174573	246069	248534	209314	276070	210084	231924	296628	230727	243813	235359	243067	246119	260867	261251	233008	230667	260664	232722	190982	242575	246459
Rpl29	A_55_P2061045	37938.1	71152	51973.9	37938.1	70035.7	72825.5	57336	87095	60494.9	70484.1	91908.6	60615.1	70654.5	69005.8	81122.6	70197	82896.7	73959.9	70785.2	64185	79236.5	67311.1	50128.6	68864.6	72656.6
Rpl3	A_55_P2030802	90603.1	166768	128765	90603.1	145970	142289	104611	180676	130848	157783	190917	124442	160399	119964	140300	155893	153050	174903	154337	123737	168587	139616	118544	139430	118624
Rpl30	A_55_P1952475	73573.6	99792	74702.9	73573.6	88071.7	99908	76472.5	107007	82203.4	87692.1	109296	92882.1	93259.5	84742.8	99077.6	93656	104024	111673	85095.7	87489	108878	91550.1	75468.6	98390.1	85401.1
Rpl30	A_55_P2104941	41986.6	63175.5	45203.4	42963.1	57858.2	52623.5	58969.5	58995.5	54921.4	51449.1	67704.1	58488.6	54280	66961.8	55246.6	52366	54993.7	65145.9	48344.7	64352.5	63745	59087.1	41986.6	66136.1	62930.6
Rpl31	A_55_P2180477	97051.6	135370	99913.9	100564	124726	121712	120667	130221	131148	126866	136681	135130	116051	126345	115879	123140	118100	140838	113173	121789	124569	115301	97051.6	136288	117151
Rpl31	A_55_P2038298	83702.1	118844	89102.9	83702.1	110204	107411	109873	113009	114112	111747	123976	114712	109412	106730	102299	105829	103842	119792	99463.7	110108	108773	102197	85648.6	117117	106338
Rpl31	A_55_P2038299	54192.1	107230	75705.9	54192.1	98541.2	104578	81932.5	115484	85249.4	104968	114682	95173.6	100507	80590.8	93441.1	103445	103196	116234	89900.2	88029	104398	90767.1	73480.6	84011.6	84556.6
Rpl31	A_55_P2001155	41950.1	72868.5	57559.9	45967.6	73482.7	71159	56734	73723	65544.9	72283.6	78125.1	66620.1	70143	58672.8	64795.1	69429	66997.7	80561.9	64155.7	62626	69541.5	41950.1	53242.6	65609.6	57638.6
Rpl32	A_55_P2149049	151054	205636	165145	171267	180054	175142	183563	203568	195969	166937	217149	199590	181807	224392	195815	182310	171631	203257	172990	189078	205214	188841	151054	204936	202932
Rpl34	A_55_P2029022	138684	193713	138684	138928	156489	163649	143746	181826	164173	149765	208359	185331	172330	160719	169943	165567	185245	215711	161026	176011	192038	175376	138756	172525	168696
Rpl34	A_55_P2024358	78308.1	125134	86958.9	78308.1	99101.7	105464	91683.5	120700	99500.4	96272.1	137732	119935	121034	104038	108113	106657	122641	138785	106656	116164	127937	122764	93102.1	110643	111694
Rpl35	A_55_P2149020	236035	299440	254343	257802	269470	280132	266024	299084	283807	268933	314160	289601	273139	297360	291813	285254	282691	309849	260387	274571	313161	265570	236035	285861	288333
Rpl35a	A_55_P1970087	73737.6	109658	82544.9	73737.6	94462.7	100356	95005.5	109028	92805.9	89370.6	118106	96510.6	99549	100528	102584	102952	100109	113999	89813.7	100286	109106	96496.1	80097.1	94746.6	92094.1
Rpl36	A_55_P1976983	159934	187529	159934	163354	176276	183214	169750	202944	185327	171477	215034	181736	193697	192517	198199	180772	174640	214818	175140	187047	203973	178085	168032	174865	167596
Rpl36	A_55_P2002113	141998	178379	142034	142075	157894	156936	144271	178850	160491	153961	192664	162367	165972	169726	170451	155162	154128	187519	152151	162840	177684	159591	141998	152429	144791
Rpl36	A_55_P2071326	45794.5	75378	53604.9	49384.1	58641.7	60020	45794.5	71513.5	54930.9	60156.6	81258.6	53563.1	65281.5	58537.3	78406.1	56782.5	55829.2	80872.4	59134.7	60618.5	75028	65032.1	55609.6	48965.6	46097.6
Rpl36a	A_55_P1956707	50975.6	62874.5	51429.9	50975.6	77387.7	77292.5	73326.5	75026.5	75444.4	61446.1	83350.1	86912.1	71260	72726.8	60458.6	70506	69088.7	92691.9	59214.2	84165	68348	57855.1	55448.6	79163.6	69745.1
Rpl36a	A_55_P2019019	50729.9	76906	50729.9	54856.1	76919.7	77742	80596.5	76143.5	79339.4	59055.6	89967.1	99138.1	70037	79500.8	59078.1	69806.5	75279.7	98076.4	63570.7	91271	66478.5	56258.6	54940.6	84956.6	77410.1
Rpl36a	A_55_P2102816	20718.6	38300	22668.9	27088.1	33841.7	32695.5	37280.5	35612	39819.4	28662.6	38693.1	42781.1	29554	38107.3	31755.1	31642	32253.7	41253.9	27414.7	41687	34343	26376.1	20718.6	41391.1	39664.1
Rpl36al	A_55_P2050040	17398.6	36488	24749.4	24888.6	32473.7	28595.5	30391	36081	35839.4	26936.6	36065.6	38748.1	28813	45950.8	38812.1	35116	31140.7	30033.9	21999.7	28840	38836	26271.1	17398.6	37061.1	37262.1
Rpl37	A_65_P06061	239730	285315	245449	252540	268872	276542	240433	284729	262677	255460	298020	272526	266854	282547	260133	270900	261481	289722	251040	272653	279077	260665	239730	272663	257249
Rpl37a	A_55_P2075479	274618	331239	274618	292368	318510	327362	321199	327859	329835	305385	354028	332683	310350	304981	294938	321642	322619	362143	317842	348171	307601	292149	287985	320075	298175
Rpl37a	A_55_P1957204	257842	303611	257842	264436	293660	295410	281733	308952	295305	284747	329703	304503	295185	275428	272499	293142	299574	326395	294576	304037	278350	272222	272596	293346	257940
Rpl38	A_55_P2091308	153458	211014	165619	181976	185398	183443	163786	207085	188812	183158	219649	198475	186864	195180	192626	183583	187928	201485	171865	181759	203065	186733	153458	191440	178233
Rpl38	A_55_P1955059	144180	187557	154968	167030	163145	161590	164409	183019	173103	166863	195759	180640	174077	187979	169228	169464	169365	181225	164619	175985	181980	164167	144180	189290	175331
Rpl39	A_55_P2182106	78104.9	125225	78104.9	83210.1	103861	103433	93343.5	107184	95115.9	101881	120782	113693	104594	87275.8	89579.1	92370	95360.2	139553	103067	113374	101560	100198	82800.6	99640.6	97162.1
Rpl4	A_55_P2014807	31377.6	38513	34409.9	44924.1	43915.7	37928.5	52185	46174	60180.4	39397.6	46964.1	57946.6	37562.5	74883.8	47027.1	43999	37382.7	45234.9	39042.7	55523	45732.5	43571.6	31377.6	59092.6	53370.1
Rpl41	A_55_P2027819	268722	342315	304357	278435	330884	317609	290248	339168	322347	339164	374891	314075	327530	325951	344025	332232	312650	358660	305201	299811	352633	304470	268722	322964	307216
Rpl5	A_55_P2024012	21370.1	43584	30189.9	21370.1	35809.7	35774.5	38099	43692	42006.4	36628.6	47423.1	43440.1	40393	50655.8	35464.1	40610	33403.7	46378.9	33934.7	41211	44437.5	40597.1	30244.6	45992.6	46956.1
Rpl6	A_55_P2042426	126166	164994	135264	140754	160783	152482	157777	172533	173253	152278	182596	169850	151374	185299	156936	161639	155306	168693	151027	160037	172050	152091	126166	178457	172029
Rpl6	A_55_P2052634	102112	139534	114271	108739	136854	134117	130744	151553	143366	136823	166400	145381	132486	146583	139605	141446	138780	138867	122460	132171	150984	124172	102112	164370	145114
Rpl6	A_55_P1990859	91752.6	136505	100648	103401	124343	115387	124587	135337	136072	123701	149087	135924	120669	140630	128251	125906	126826	134081	111686	131141	140421	108505	91752.6	151541	142434
Rpl7	A_55_P2081168	103608	139232	111237	103608	131850	134339	130982	145163	137913	124905	148733	136219	132278	152520	127501	139449	128345	148715	127753	136593	139579	130208	112296	148987	140922
Rpl7	A_55_P2174632	89204.1	115697	92317.9	89204.1	107877	113410	124712	129374	129243	100920	128398	132784	105085	141123	104042	117943	112269	125953	105563	139867	119022	113035	90721.6	132884	132095
Rpl7	A_55_P2073840	75482.6	93743	79254.9	80384.1	92532.7	91312.5	97387.5	101096	103859	85186.1	102670	104744	83472	123503	96576.1	95384.5	85350.7	97483.9	83904.7	102871	94807.5	94599.6	75482.6	111471	111220
Rpl7	A_55_P2126470	29485.1	57422	35754.4	29485.1	47171.7	46290	45657.5	51857	49320.4	42045.6	58142.1	48198.1	47066	54906.8	44065.1	49679	44417.7	58178.9	47888.7	61264	55396.5	48358.1	36223.6	55251.6	52929.6
Rpl7a	A_55_P2024080	41250.6	59712	47375.9	49707.1	57014.7	52767.5	63728.5	67000	68662.9	49567.6	70020.1	72104.1	56154	82920.8	58045.6	61819	57835.2	59486.4	51859.7	66177.5	64738.5	56144.1	41250.6	69676.6	71112.6
Rpl7a	A_55_P2039598	13686.1	37634.5	30470.9	13686.1	36689.7	33538.5	26146	40155.5	27315.4	36679.1	43035.1	30434.6	38178	36398.8	30251.1	36583	36358.7	35514.4	35901.7	29324.5	42895	35846.1	26767.1	26627.1	27804.1
Rpl7a-ps5	A_55_P2155996	47490.6	90048	69797.9	47490.6	82541.7	82987.5	72686.5	103346	79330.4	88700.1	109265	79933.1	89113.5	86698.3	86064.6	89424.5	89307.7	83376.9	83501.7	84033	100403	78449.6	61604.1	79607.1	82656.1
Rpl7a-ps8	A_55_P2156401	23262.1	39279	28838.9	23262.1	35366.7	33747.5	31955	42624	34321.4	36188.6	48076.1	35495.1	37630.5	39455.8	37453.1	37413	35439.7	34551.4	34404.7	36918.5	43174.5	34138.1	24920.6	37135.1	38758.1
Rpl8	A_66_P139116	139452	171690	150666	148692	192370	190305	185275	208161	196914	182901	214226	206259	172387	212345	182885	197655	201827	160159	163841	194037	187528	166377	139452	212926	187040
Rpl8	A_55_P1965571	49409.1	96040	78006.9	49409.1	109476	100846	83418.5	114305	90429.4	96032.6	118638	89560.1	91723.5	82662.8	85527.6	111631	111105	92524.4	82144.7	82707	101196	78668.1	64280.6	104431	86678.6
Rpl9	A_55_P1998825	207338	277072	219279	214602	277939	278379	276258	287855	282689	251407	316368	289028	265971	275841	233595	284624	266320	313493	247197	276032	290472	235853	207338	288409	266926
Rpl9	A_55_P2185461	98635.1	132752	112165	98635.1	139089	146526	141225	167084	138644	132007	172068	140408	139787	138990	130355	146934	139469	158989	121042	139675	149337	128776	106865	139613	148863
Rplp0	A_55_P2135098	279016	331160	292816	279016	319085	311636	300631	353614	332015	323555	379169	332267	313063	341031	310517	346539	321382	352740	312837	333922	352101	314456	281379	361137	343664
Rplp0	A_55_P1970866	103764	167907	119387	124775	141631	137992	142296	159405	168680	146829	183689	166031	139892	178443	143795	156931	141391	173987	148984	185607	168345	149705	103764	206533	189705
Rplp1	A_55_P2155826	146472	225608	180824	146472	223148	229423	202298	244045	211599	209539	260824	222813	218999	190501	181920	235973	246504	256534	225972	249295	230310	200405	166660	234424	212156
Rplp2	A_55_P1990285	189651	234870	203810	206505	238774	250697	249211	259416	258389	234569	273045	255862	235713	254834	251818	263343	249600	260992	238128	266403	271641	226127	189651	280750	262238
Rpn1	A_51_P379710	33159	33159	43648.9	33791.1	57292.2	61246	60004.5	72506.5	64084.9	60565.1	58713.1	55724.6	49344	62384.3	55749.1	70312.5	69475.7	48120.9	46634.7	47514	63767.5	38421.1	37340.6	90566.1	75198.1
Rpn2	A_55_P2145109	24535.1	33159	28781.9	30145.1	40033.2	32692.5	49612.5	36390	53076.4	32093.1	37412.1	42954.1	30612	48504.8	32382.1	35255	32875.7	37442.9	42283.2	53317	38424	36062.1	24535.1	58581.6	55407.1
Rps10	A_55_P2051047	213622	302151	228442	213622	257833	260724	243404	285449	279970	246850	304560	288259	272014	262580	245334	255354	261119	290819	247166	252943	284784	253878	215820	292154	273995
Rps11	A_55_P2171976	88770.1	113025	94718.9	99472.1	106035	97731.5	117580	114185	120895	99872.1	126223	123104	106981	130177	101340	112558	110286	120355	102996	122273	119937	99464.6	88770.1	127408	124059
Rps11	A_55_P2097657	83975.1	111989	97789.9	83975.1	105862	101933	103430	126421	108341	100777	135612	114166	114259	118544	101041	112689	112931	119090	103138	113800	125646	106394	95905.6	115492	112989
Rps11	A_55_P2097656	81773.6	98915	84781.9	81853.1	94742.7	94119.5	97784.5	108927	100523	88775.6	113792	102835	96263.5	105843	93040.1	99898	96180.7	106992	89935.7	99435.5	106769	90484.6	81773.6	104534	98380.1
Rps11	A_55_P2087589	54986.1	91824.5	74602.4	54986.1	88687.2	80079.5	78097.5	97651	81550.4	86858.6	110805	84283.1	88153	87133.8	83791.6	86063	89354.2	94731.9	81806.7	83165.5	103658	84371.6	74692.1	84212.1	89106.1
Rps12	A_55_P1989328	158095	211682	174859	176274	183416	193607	191341	214197	197446	185621	232447	210444	195668	214138	205344	188752	187542	214588	162426	186437	215697	192993	158095	181713	175616
Rps12	A_55_P1963080	119879	140946	121359	157660	133147	135140	144036	144095	150583	141826	147208	162477	126460	180982	142474	136182	129121	141431	119879	157527	137409	138726	121440	164987	154629
Rps13	A_55_P1963084	102259	140794	115806	102259	126610	130022	121324	153032	123292	120617	157066	129657	136600	143370	136680	137095	150728	152571	128049	127375	150258	127880	107784	137373	136594
Rps14	A_55_P2186672	285945	340888	304436	285945	316436	323397	314347	356892	346442	326281	363855	350113	325463	356449	317234	340110	312428	344707	301370	336822	349165	321721	311194	364351	336013
Rps15	A_55_P2037524	71865.1	116134	83462.4	71865.1	115248	102960	93389.5	116289	101664	132962	129888	93877.1	109555	85167.8	137817	97361	103376	123903	112812	113372	112806	92249.1	75989.1	104883	87241.6
Rps15	A_66_P124555	20373.1	48162.5	32906.9	20373.1	46502.7	42884.5	38872.5	49230	43467.4	54327.6	52727.1	40475.1	43041	37803.3	49940.1	42038	47326.7	51748.4	45390.2	45754.5	43861.5	35688.1	29311.6	43576.6	34104.1
Rps15a	A_55_P2109943	82286.6	119347	82547.9	82286.6	85348.7	96288	82960	111159	94627.4	93996.6	122724	112513	102475	97230.8	94171.1	98546	105435	139065	91668.7	104451	106861	107864	84340.1	97164.6	100893
Rps15a	A_55_P1960775	47045.1	86139	53393.9	47045.1	53171.7	58755	53398.5	69797	57817.9	60868.1	82846.6	64893.1	73666	55806.3	54290.1	62152	63091.7	87304.9	59721.2	69432	73423.5	69584.6	53705.6	62397.1	66003.1
Rps16	A_55_P1963062	185808	271886	238622	185808	275067	272298	237214	284376	240611	263550	316530	245025	276158	255930	265862	257031	258595	293817	247993	222870	294849	277103	240342	254566	236314
Rps16	A_55_P1963061	184468	218098	215183	184468	236799	243714	226671	249519	241130	231414	273146	235373	241570	250142	245122	239215	222145	259414	220009	219371	261010	236473	209794	253486	229747
Rps16	A_55_P2132844	47092.6	63030	58037.9	47092.6	68590.7	70391	63720.5	74564	65020.4	65939.1	82832.1	62542.1	71122	70894.8	73160.1	62705	60678.7	69560.9	57048.7	62253	74465.5	68414.1	58406.6	70157.6	70620.1
Rps17	A_55_P2169721	46594.1	67866	48322.9	70774.1	60696.7	56957.5	76098	61833	84249.4	56574.6	66903.1	84699.1	57719	85489.8	60279.6	59930	55754.7	68045.9	55812.7	85286	59587.5	55965.1	46594.1	86132.6	81396.1
Rps18	A_55_P2135632	60192.1	119876	82227.9	60192.1	95968.7	93820.5	79969	113840	90614.4	96050.6	129152	88345.1	107671	81760.8	100234	107271	100115	126805	102445	101556	118389	101969	76130.6	98320.6	92085.6
Rps18	A_55_P2135631	23634.1	65194.5	44158.4	23634.1	48888.7	51561.5	41611.5	63496	53118.4	54777.6	71231.1	49219.6	56838.5	49919.3	62414.1	56720	54025.7	74138.9	49012.7	51199.5	64679.5	51350.1	38649.6	50950.1	52825.1
Rps19	A_55_P2098471	42546.6	81579	64496.9	42546.6	71455.7	74781.5	63450.5	82815	71516.4	75599.6	91788.1	70915.1	77747	65054.8	79744.1	67537.5	68574.2	86956.9	63192.7	73033	78756	78642.6	64342.6	63084.6	67487.1
Rps2	A_55_P2070347	143900	207278	182355	147995	225686	213333	185226	240883	202403	227744	252483	200452	211329	204233	208550	224089	217683	205961	190664	199536	226085	175022	143900	222017	197434
Rps2	A_55_P2048454	73597.1	154316	132972	73597.1	170537	158382	144876	186574	157075	165703	194283	162428	160061	162663	149596	172663	173828	152193	145354	148591	181143	133210	98910.6	164455	159777
Rps20	A_55_P2121543	219535	258099	219535	235965	251464	243486	242175	257841	259542	249841	270991	264789	244321	275415	236370	257217	234002	271542	239640	271745	252061	243650	227169	275114	243472
Rps24	A_55_P2032600	155639	195339	169170	177608	180627	177344	174522	198318	197779	181941	207025	205255	170853	225737	194977	190990	174717	195003	170666	186876	197766	183562	155639	209958	188481
Rps24	A_55_P2137773	125176	154617	134911	157957	148693	140690	144259	152778	172166	153407	160615	166178	139151	176966	157399	162486	137428	158866	137507	152101	157518	146151	125176	179304	160756
Rps24	A_55_P1993880	11251.6	18501.5	12600.9	27293.1	17917.7	14191.5	30995	16904	31181.4	14247.1	19209.6	34164.1	15665	41467.8	17191.1	16469	15496.7	18614.9	13834.2	33870	18254	18931.1	11251.6	35638.6	34268.1
Rps25	A_55_P2137186	74254.6	105538	78646.9	82512.1	83445.7	91751.5	77357.5	105690	89188.4	80028.6	111116	89944.1	95437.5	100611	103475	93987	96813.2	117405	86179.2	84250	110250	91545.1	74254.6	86968.6	88481.6
Rps26	A_55_P2184246	161965	228229	188088	161965	221371	219620	192171	241083	206157	216351	254843	211709	222801	202590	220600	230714	228704	261590	216965	217904	222385	205152	187367	223666	213168
Rps27	A_55_P2158112	137588	192581	143545	137588	184642	180984	168099	184937	172580	175643	208242	190201	184817	154264	170591	172283	182780	223819	185338	203828	180889	179573	159286	193219	169258
Rps27	A_55_P2155438	126644	189865	132572	126644	179378	181445	145294	178974	158326	167669	199115	178030	171991	130728	175048	172131	171640	227812	175048	203758	178781	171525	152867	184045	157455
Rps27	A_55_P2163622	87760.9	139889	87760.9	93700.6	125873	120675	109752	121695	123815	125662	144865	135900	125227	111744	129373	115241	118077	169952	133879	152150	128410	125417	102585	141783	120803
Rps27	A_55_P2024322	78799.9	109829	78799.9	88631.1	107956	102514	102987	101624	108901	96647.6	117230	120133	101485	96257.8	96401.1	98965	99138.7	133086	102086	133979	102211	98745.6	88193.6	128794	107432
Rps27a	A_55_P1976108	169929	254490	189765	178994	220385	241585	200333	261013	208472	209691	264026	222305	214711	200971	224199	248133	233369	272503	203276	223932	254991	212530	169929	228344	214359
Rps27a	A_55_P2025174	34385.1	51364	40025.9	65293.1	57450.7	47785.5	63691	54526	71704.4	44704.6	55326.1	76881.1	39418	101324	60750.1	51234	48052.7	54856.9	41125.7	67827	52919.5	54582.6	34385.1	78420.1	64718.6
Rps27l	A_51_P246903	54066.6	113176	91430.9	82719.1	74621.7	83414.5	66520.5	106090	76768.4	85751.6	104376	85689.1	82723	95327.3	85868.1	67427	74649.7	114911	78300.7	81599	102703	82973.1	72513.1	54066.6	61809.1
Rps28	A_55_P1972841	23330.5	23330.5	165062	161971	202062	193811	198448	210111	202563	180755	230192	216676	192504	210760	190851	183885	195231	238500	185864	237368	195118	176475	159322	211678	201346
Rps29	A_55_P1958354	144557	231644	161003	160322	198002	188663	171228	193689	203637	182577	221659	206685	186813	175874	194918	188722	199058	229475	193552	196907	207108	172181	144557	218046	177085
Rps29	A_55_P2154240	117017	213932	148113	117017	177162	175536	145042	182199	154455	175687	203723	167204	176687	145286	179756	180618	195979	219281	175404	173658	184729	154523	137571	172730	151868
Rps3	A_51_P318640	17676.1	27281.5	20636.4	33856.1	25422.2	24093.5	39415.5	28908.5	48783.9	21618.6	29998.1	47587.1	24316	46591.3	25481.1	26907.5	26408.7	25541.9	19734.7	41072	28688.5	23868.1	17676.1	56120.6	48929.1
Rps3a	A_55_P2056190	89523.1	155104	101740	89523.1	120402	120445	113661	143150	125517	122557	158226	123502	127310	122776	122392	122995	121366	146140	119144	124431	139734	126113	100704	136986	129104
Rps3a	A_55_P2136385	34768.6	81175.5	56019.9	34768.6	67132.7	67328.5	60199.5	76653	59857.9	67474.6	85733.1	60025.1	73815.5	67109.8	60368.1	66782.5	62714.7	77755.9	65561.2	68608	75445.5	72722.1	57817.6	69657.1	67798.1
Rps4x	A_55_P2081829	71222.1	111349	79731.9	71222.1	98419.2	97325.5	85133	103573	96857.4	94246.6	117157	99580.1	101444	91678.8	90190.1	96034	95913.7	115301	100557	97265.5	101808	94769.1	80328.1	114690	93728.1
Rps4x	A_55_P1960764	38438.1	67372	41963.9	38438.1	53585.2	55339.5	51261.5	63748	56095.4	54373.6	73150.1	58493.1	59705	53095.8	52833.1	52817.5	55988.7	65583.4	62265.7	69412.5	61650	56637.1	43174.6	64219.6	61078.1
Rps5	A_55_P2063992	236918	300832	256140	236918	292292	297183	273344	324426	297254	289669	329497	297056	299426	300328	275296	308974	291521	322747	295231	306108	312094	279356	249553	325298	297008
Rps6	A_55_P1963817	141900	205231	158492	145582	177434	175258	150500	201631	189509	178317	222929	189478	193537	187272	186004	179915	178513	199513	192844	172907	203879	182643	141900	198312	156685
Rps6	A_55_P1955239	41877.1	73419	51320.9	41877.1	61717.2	63543.5	59741.5	75170	60816.4	59346.1	79899.1	64065.1	70048	63061.8	64152.1	65088	64311.2	67780.4	65516.7	67385	73067.5	66466.1	48380.6	69604.1	68781.1
Rps6-ps2	A_55_P1955237	149207	183196	153779	162961	171657	179625	173919	206395	181036	164927	201528	189688	172640	192181	166568	179825	173379	185824	156896	181471	182739	172231	149207	199092	185876
Rps6kb1	A_55_P2019083	11192.6	12437	12201.9	11626.6	12275.7	13113	13191.5	18433	16748.4	11192.6	19165.6	19148.1	18099.5	18298.8	14829.1	18346	17153.2	14734.4	13306.2	15103	16406	20052.6	13183.1	26727.6	23118.1
Rps7	A_55_P2055411	45347.1	73036	55536.9	45347.1	77468.7	71382.5	72184	80588	72140.4	76309.6	86757.1	78294.6	75170	81714.3	69276.1	72775.5	66431.7	89622.9	70772.7	82792	77865	76697.6	57173.6	79347.6	77045.1
Rps8	A_55_P2155397	246471	306713	254992	247314	289834	277804	289674	306922	285315	288339	319404	294555	284912	305034	252910	290692	269258	304008	282659	290569	289990	280362	246471	327941	284766
Rps8	A_55_P2093535	147686	250501	187542	147686	230142	220962	190495	245536	197238	217634	271719	198520	236591	188512	176230	226295	207043	241899	217219	183679	228917	214225	173612	253239	193929
Rps8-ps1	A_55_P1985565	61202.1	95830	75234.4	70903.1	92431.2	84223	96930.5	102021	90010.4	88322.6	106722	96947.6	93984	96406.8	61202.1	91540	83890.7	88896.9	83782.7	94345.5	84808.5	89139.6	67819.6	118608	100449
Rps9	A_55_P2047571	93522.6	170378	136732	93522.6	165905	160642	138664	181970	152629	165452	195641	146305	163204	154363	162850	185153	177769	195057	168920	159541	179899	142764	133738	174994	154729
Rpsa	A_55_P1970700	147154	181281	157915	182866	174172	174535	190333	191786	198712	180067	197275	201681	165906	209906	172864	186353	171667	180832	160760	195113	185058	164229	147154	213050	192017
Rpsa	A_55_P2038077	120517	203089	149237	154174	221772	209454	183201	235488	195722	204874	252256	192228	194503	184874	194979	218799	219409	215957	192620	208690	215934	164708	120517	254052	221567
Rpsa	A_55_P2017850	16826.1	33625	25740.9	16826.1	42496.7	38228.5	38122.5	43174	33881.4	44596.6	46729.6	36638.1	37865	34247.8	29895.1	39674	43571.7	40768.9	36025.7	40667	38123.5	29258.1	20943.6	41295.6	41289.1
Rrbp1	A_51_P345663	18192.5	25094	27475.4	20022.1	34693.7	32195.5	28952.5	39712.5	40822.4	38373.6	39515.1	32359.6	28655	27785.8	25562.6	32556	27784.7	28940.4	30113.7	18192.5	35793.5	32799.1	25727.6	50730.6	38337.1
Rrp1	A_66_P135882	17464.5	25468.5	22389.9	17865.6	20470.7	20592.5	17464.5	31760.5	23607.4	23430.1	31336.1	21558.6	24590.5	31570.8	25300.1	21517	22007.2	20834.9	24825.7	22759	30345	25241.6	19686.6	22338.1	23789.1
Rsl1d1	A_55_P1980020	11017.6	19727	16886.4	12027.6	15785.7	15610.5	17379.5	29390	18946.9	15183.6	20648.1	16817.1	14386	35018.8	26189.1	24359.5	25313.7	20002.9	15433.7	16109	34080.5	15391.1	11017.6	20981.6	25340.6
S100a11	A_55_P2065991	11481.6	57596	33214.9	27656.1	25001.7	19437	19632	30224.5	22409.9	55889.6	36708.1	17967.1	30607	29077.8	53471.1	17719	17345.7	22812.4	33707.7	12387	37230.5	38791.1	23746.1	11481.6	15263.1
S100a6	A_51_P281089	185502	404447	346850	300605	260130	270361	238095	316946	295352	323101	352314	285826	310216	285624	302321	264929	253756	261395	244417	255047	347670	291351	239307	185502	217793
Sar1a	A_52_P652193	30551.1	35652	33846.4	30551.1	37143.7	36354.5	46164	44265	50429.4	37238.6	44770.1	47353.1	39687	40318.3	33121.1	41742	37892.7	41023.9	41784.7	46570.5	40597.5	38826.1	32427.6	53925.6	49423.1
Sars	A_55_P1972257	18321.6	26709	25123.4	18321.6	30214.7	25626.5	26750.5	55504	32598.4	42002.6	38169.1	30375.1	31344	38933.8	35494.1	38133.5	40380.7	31748.4	30898.2	34913	34830.5	33356.1	21560.6	42488.1	43372.6
Scamp3	A_55_P2053858	23316.6	33973.5	29424.4	23316.6	27965.7	26675.5	25926	35144	29928.9	33758.6	36664.1	27882.1	28176	37081.3	33212.1	26350	27762.2	29498.4	35363.7	31556.5	33830.5	29148.1	24980.6	31713.6	30916.6
Scamp3	A_66_P132510	20213.1	34395.5	28618.9	20213.1	26174.7	24303.5	23151.5	34609	26897.9	31850.6	34692.6	25133.6	25484.5	27173.3	30723.1	25092	26543.7	29398.9	34290.7	26403	32882	26898.1	23644.1	28216.1	26428.1
Scand1	A_55_P2041758	36805	46854	36894.9	37259.1	44979.2	43379	36805	58739	42823.4	48053.6	54289.1	49420.1	44816	43336.3	41101.6	42622.5	51068.7	55440.4	57665.7	69106	43116.5	46523.1	42870.6	49361.1	45692.1
Scarf2	A_55_P2172440	21397.1	37680	33911.4	21397.1	39374.7	36861.5	32480.5	44326	34345.9	45600.1	58358.6	45206.6	58077	21597.3	22862.6	32476	34936.7	57714.9	79725.7	56160.5	39096.5	64618.6	56675.1	32481.1	30411.1
Scd2	A_51_P129464	13553.1	32297	22566.4	18249.1	19232.2	17650	17118	33969	28119.4	25724.6	38876.6	13553.1	27842.5	31469.8	27411.6	28689.5	27549.7	30189.9	32675.7	34474.5	53034.5	28404.1	27384.6	74858.6	79078.1
Sdf2	A_51_P148196	19673.1	41222.5	28696.9	19673.1	31434.7	31645.5	24891.5	29539	28702.4	26252.6	34474.1	27466.1	28883	24605.8	20712.1	26991	26970.7	41857.4	37544.2	35156.5	28314.5	34507.1	29583.6	28891.6	24255.6
Sdhb	A_66_P116126	27408.6	35831	29563.9	29593.1	40200.2	39719.5	39449.5	45760	42033.4	33607.6	42793.1	41661.1	35325	45603.8	38643.6	38612.5	43059.2	37955.9	38502.7	44250	38809	33165.1	27408.6	48166.6	42674.1
Sdhd	A_51_P260871	12071.1	18754	15475.9	12071.1	19019.2	16446.5	15717.5	22739	18468.4	15832.1	21591.1	17052.1	17304	33512.8	23736.1	20529	19539.2	21070.9	17970.7	21423	24376	19014.1	13064.1	21070.6	22689.1
Sec11a	A_52_P242973	10577.1	21966	16851.9	10577.1	16018.7	17209.5	15235.5	22333	18617.9	19824.6	22053.6	16750.1	18132.5	21153.3	18264.1	20011.5	19209.7	23314.4	21819.7	20727.5	23482.5	20763.6	16576.6	22159.1	18296.6
Sec22b	A_52_P418934	11257.6	18255	13838.9	11257.6	20412.7	17462.5	16297.5	17695	17345.4	16657.6	17951.1	15430.1	15007.5	17092.8	14797.6	15949	15831.7	16664.9	17817.7	15321	18039	16704.1	12580.6	19517.6	18716.6
Sec24c	A_55_P2024575	16143.1	32857	26817.9	16143.1	25007.7	27382.5	23253.5	35044.5	27014.4	24702.1	33045.1	24010.1	26765	30769.3	26646.1	25568	25607.2	29693.4	35985.7	26937	40194.5	27297.6	24581.1	29401.6	29403.1
Sec31a	A_51_P273326	12627.6	16276.5	15111.9	16346.6	15386.7	13521.5	14766.5	19414	20591.9	20579.1	18704.1	18263.6	15498	18676.8	22758.1	14474	15117.7	14466.9	16299.7	16919	19276.5	17124.1	12627.6	22989.1	21110.1
Sec61a1	A_52_P489729	23035.6	35109	28325.9	23035.6	35819.7	31239	29704.5	48403	43341.4	38202.6	45923.6	40649.1	37355	40580.8	37858.1	43927	43084.7	33798.9	39662.2	32045	51280	38204.1	23159.6	45529.1	45565.1
Sec61b	A_55_P2051962	41336.6	71010	50259.9	42966.6	56178.2	59268.5	50026.5	87448.5	62862.4	64068.6	83601.1	75319.1	68035	76797.8	73344.6	67636	82130.7	57077.9	47879.7	55592	78323.5	57752.6	41336.6	58356.1	73734.6
Sec61g	A_55_P2155421	49476.1	93201.5	65292.4	55457.6	65436.7	77489.5	50157.5	104898	67526.9	82072.1	114601	79098.1	85693	71705.8	91817.6	74945	83242.7	93588.9	60228.2	58682	103226	78415.1	54989.1	49476.1	64233.1
Sec62	A_55_P2040763	12063.1	21347	16534.9	12063.1	18007.7	16486.5	16682.5	16790	15984.4	15844.6	19264.1	16965.1	17149	20781.8	13885.1	15152.5	13939.7	26272.4	23896.7	20383	16469.5	23118.1	18579.6	19187.6	17040.1
Selk	A_55_P2128821	16649.1	28710	19290.9	16649.1	20199.2	19472	19495.5	23355	20755.9	23769.6	26103.1	21418.1	21007	21597.8	22862.6	21212	20514.7	30521.9	28426.7	25049.5	27931.5	21623.1	19051.6	27751.6	26550.1
Selm	A_52_P357133	15640.8	31501	22565.4	23003.1	25607.2	21904.5	20120	29671	22729.4	29944.6	33485.1	24723.1	25469	15640.8	21552.1	16213	17908.7	20639.9	24607.7	26448.5	18954.5	26480.1	18961.1	20859.6	21404.1
Sema4c	A_55_P1953866	12068.1	18609.5	19745.9	12068.1	29765.2	30156.5	39740.5	23709	34796.9	18120.1	21529.1	40329.1	23471	49330.8	22290.1	18788	20614.2	29567.4	32326.7	45962	27859.5	20575.1	17124.1	55787.6	28398.1
Sepw1	A_55_P2052924	12924	20839.5	19954.9	16576.6	22996.2	18266.5	15622	28778.5	19649.4	37959.1	32226.1	23843.1	29408	20459.8	28527.6	17745	19922.7	29966.9	26367.7	21817	12924	19700.1	13182.6	20097.1	15625.1
Sepx1	A_55_P1990919	24383.1	100233	64622.9	67285.6	30224.7	26505.5	25939.5	69310	62256.4	92172.1	68259.1	57151.1	57140.5	24753.8	24383.1	40245	38862.7	46006.4	46593.7	55287	25529	72544.1	46347.1	43580.6	38691.6
Serf2	A_55_P2006467	68724.8	133431	99440.9	86002.1	118342	113816	94357.5	109433	91372.4	131609	147038	103951	123142	68724.8	103638	96162	99954.7	145977	128955	127341	101901	101235	91234.6	105748	93791.1
Serinc1	A_51_P358225	20704.1	26272	27800.4	20704.1	21736.7	22064.5	21721.5	29256.5	28938.4	26338.6	27703.1	23622.1	25015.5	27822.8	20895.1	25573	22350.2	30450.9	29567.7	29707.5	26502	28641.1	25946.6	32940.1	30049.1
Serpinb6a	A_55_P2066727	61400.5	115688	85503.9	65658.6	68534.2	61400.5	65778.5	63696	62848.4	71135.1	87149.1	68611.1	84316	88739.3	79314.6	82759	81332.7	81975.4	81824.2	82439.5	84813.5	88846.1	70683.1	79722.1	90801.1
Serpinb6c	A_55_P2047768	39572.5	84726	56256.4	45930.1	45821.2	40152.5	39572.5	43434	41811.9	45189.6	60758.6	47151.6	54993	56865.3	52538.1	54968.5	53955.7	55232.9	52636.2	60814	59657.5	62909.1	45809.6	57538.1	63624.1
Serpine1	A_55_P2119257	75205.6	163639	190935	151539	183541	197180	210813	237936	144992	193090	159562	122309	120874	295812	306659	250067	238787	184678	200840	188297	324529	103645	75205.6	156134	252426
Serpinh1	A_51_P287069	58736.3	73392	63896.9	86641.6	88266.2	83275.5	83116	99444.5	97644.4	94574.6	83743.1	85086.1	69234	58736.3	84058.6	78250	79324.7	68360.9	73508.7	77885	76762	76653.1	60742.1	119850	101875
Sf3b3	A_55_P2056300	11626.6	15927	19719.9	11626.6	26456.7	25729.5	25646.5	26023	23256.4	21034.1	22662.1	17523.1	18790	29477.3	24032.1	25587.5	26022.7	20521.4	20916.2	18156	29821	20998.1	18681.6	27380.1	25891.1
Sf3b5	A_55_P2056286	15142.1	27079.5	22364.9	15142.1	28627.7	28127	24616.5	32831.5	25102.9	25502.6	32124.1	22713.1	24629	30851.8	31789.1	32850.5	35223.2	25145.9	27886.7	26327	36663.5	22899.1	17952.6	24816.6	26567.1
Sfxn3	A_55_P2012389	10255.7	17797	15201.9	11669.6	12663.7	12341.5	12341.5	12795	15878.4	16532.1	15875.1	14836.6	15487	11513.3	10615.1	10432.5	10255.7	17718.4	21029.2	16915	10686.5	17852.1	13950.1	13343.1	11859.1
Sh3bgrl3	A_55_P2081530	26591.6	52957	36818.9	27271.6	41042.7	37419	29735	43164.5	30079.4	48898.6	45517.6	28030.1	37411	42395.8	52220.1	45608	46855.7	55483.9	63580.7	57356	40497.5	33623.1	26591.6	28329.6	30623.1
Sh3glb2	A_55_P1971849	11428.6	23899	20037.9	11428.6	18633.7	18106	18168.5	25257	22565.9	21505.6	21752.6	20175.1	17538.5	18804.8	16152.1	13510	14141.2	17206.4	19318.7	15499	21722.5	20668.1	15059.6	12207.6	14113.6
Shfm1	A_51_P180032	67462.6	97422.5	78369.9	67573.1	82770.2	87356.5	79160	96300.5	93339.4	93617.6	104265	94537.1	100335	88388.8	82660.1	86821	90703.7	107207	87793.2	102092	87059	72904.6	67462.6	82680.6	82938.6
Shisa5	A_52_P512817	29840.6	48900	48260.4	29840.6	107292	96621.5	92069	51499.5	55980.4	53417.6	61563.1	52995.1	54547	41658.8	38196.1	50049	51757.2	88903.9	83431.2	82466.5	50115.5	70575.1	58756.6	62079.1	55663.1
Sidt2	A_55_P1980267	10051.1	12818	13706.9	10051.1	17381.7	14272.5	15700.5	18638	17787.4	15020.6	18370.1	16570.1	13845	20092.8	13256.6	13694.5	13571.7	16726.9	17726.7	15636.5	16919.5	17868.1	14519.6	25272.6	19653.1
Siglech	A_55_P2141013	33028.2	43588.5	48293.9	60269.1	34751.2	46293.5	51769.5	47625	55476.9	38305.1	55222.1	66524.1	53326	83545.8	43264.1	39837	33028.2	48995.4	44615.7	43614	64487	66541.6	58679.1	60693.6	57070.1
Sigmar1	A_55_P2045812	11699.1	17787	15250.9	11699.1	16660.7	15312.5	14589.5	22858	20595.4	18500.1	22192.6	18060.1	16984	20208.8	21529.1	20823	22414.2	16815.9	19048.7	18347	25680.5	18342.1	12893.6	21364.1	22359.6
Sin3b	A_52_P57526	34465.6	64893	52666.9	34465.6	53794.7	57106.5	54355.5	56097	56287.4	46235.1	52215.1	48866.1	48395.5	57424.3	46828.1	46420	50926.7	52596.4	53253.7	57864	49846.5	51290.6	51607.6	50830.6	53485.1
Skint7	A_55_P2120388	16298.1	27713	31127.9	16298.1	46846.7	47583.5	58447.5	35712	47030.4	27733.6	33262.1	54910.6	35912	65583.3	33115.1	28352	31356.7	45333.9	49208.2	65041	42581.5	30885.6	26067.1	74817.6	41676.1
Slc10a1	A_55_P1954987	289461	349013	340684	324113	289461	342113	304453	356916	296799	328590	390196	361738	358089	377211	297745	321986	290119	374974	340316	292949	382015	374818	383284	327779	328295
Slc12a4	A_55_P2043554	17172.1	26990.5	26057.4	17172.1	26220.2	22681.5	22145.5	27855	23615.9	26137.6	25414.1	18435.1	19433.5	19004.8	18039.1	21250	19101.7	20683.9	27282.7	18797	25943.5	24672.6	24343.6	28144.6	23050.1
Slc25a3	A_55_P2042071	15078.1	24184.5	20095.9	15262.1	16917.7	15932.5	20591	21890	22998.4	16375.6	22308.1	21181.1	17871	28745.3	20870.1	17498	16994.7	15654.9	16720.7	19700.5	24790.5	18650.1	15078.1	20815.6	22519.1
Slc25a4	A_51_P108334	98438.3	181738	143412	98438.3	141929	146175	127636	196313	152952	184001	178328	139576	151333	110630	124085	135213	136205	141680	122129	132587	129639	155426	129904	123971	112597
Slc39a1	A_55_P2098558	21777	27122.5	23421.9	22328.1	26581.7	26556.5	27124.5	29469.5	37678.4	29711.1	32952.1	30467.1	29656.5	25257.8	25043.1	21777	22228.7	32999.9	35494.2	32996	26938	31506.1	27803.6	26507.6	25948.1
Slc39a7	A_51_P174016	40678.1	55630	54164.9	40678.1	58822.7	59774.5	57907.5	78341	65932.9	75803.6	66120.1	57878.1	52977	60937.8	70913.6	66165	66662.2	59600.9	68039.7	65150	69343.5	55648.1	48676.6	85802.6	72310.6
Slc3a2	A_51_P472901	16001.6	18229	21587.9	16001.6	26163.7	22937.5	20332	48359	28483.4	43458.6	30212.1	20761.6	25865	25835.8	29886.6	35677.5	37359.2	30495.9	34486.2	27063	26269.5	28336.1	19762.1	36177.6	34669.1
Slc6a8	A_55_P2000553	10619.5	17737	18208.4	12213.1	13392.7	11413.5	10619.5	17046.5	13764.4	10630.1	17700.1	15312.1	16909	21545.8	15484.1	18095	16258.7	19061.9	21817.2	18173	20469.5	29285.1	23533.1	24968.6	19808.6
Smarca4	A_55_P2154684	23526.1	38519	37655.9	23526.1	31670.7	33463	31014.5	49443.5	37072.4	35320.1	43252.1	33273.1	33060	51709.3	39061.1	40593	42797.2	31700.9	41603.2	34957	54760.5	36432.1	27305.6	39225.6	39329.6
Smo	A_51_P258766	10466.1	16622	14163.9	10466.1	17655.7	14873	12777.5	20286	20102.4	19114.6	22204.6	16414.1	19824	15268.3	11472.1	15306	16153.7	20664.4	23320.7	17039.5	17000.5	20328.1	18301.6	19171.1	13705.1
Smpd1	A_51_P429209	11396.1	20044.5	18671.4	11396.1	22874.7	19829.5	17927.5	21759.5	18638.4	21906.1	26692.1	19856.1	22553	15634.8	12205.1	16419	15743.7	26096.9	28689.7	24339	14677.5	21334.6	19863.6	19311.6	17283.6
Smyd2	A_51_P320105	13964.6	21233.5	19904.9	13964.6	20820.2	18204.5	15736	26756	25115.9	19988.6	22700.1	16556.1	18194	20629.8	19486.1	23289	24448.2	23716.9	23852.2	20548.5	23694	18815.1	14383.6	19248.1	17264.1
Snrnp70	A_55_P1990573	11847.5	15225	15705.9	16016.1	15400.7	18302	15636	22899	17626.4	18650.6	19683.1	14409.1	15834	19065.8	22145.1	18710	19846.2	15543.9	16122.2	11847.5	24558.5	15615.1	14856.1	17375.6	19365.1
Snrpd1	A_55_P1971448	10502.1	25362	17073.9	17119.1	19529.7	20595.5	21919	25358.5	27324.4	19558.6	21091.1	26271.1	16944	29578.8	29640.1	24066.5	25536.7	18466.9	15269.7	16819.5	30960	13651.6	10502.1	18281.6	20267.1
Snrpd2	A_55_P2088535	22870.6	40772	30030.4	26303.6	30394.7	30195.5	27824.5	44408.5	32820.9	37207.6	42330.6	29701.1	32334	35633.8	40741.1	38254	41502.7	32180.4	30167.7	32021	45402	31586.1	22870.6	32105.1	34898.6
Snrpd2	A_55_P2177968	20319.6	39146	27969.9	21136.1	27668.7	28302	21839	39898.5	26517.9	34832.6	38680.1	23621.1	29685	27666.3	37328.1	36758	35410.2	28951.9	26918.7	25674.5	41238.5	28209.1	20319.6	26975.1	28089.1
Snrpd2	A_55_P1954212	15379	31617	22798.9	15713.1	22028.2	21188	15379	32442	21939.4	29076.6	30607.1	21286.6	23894	27085.8	33382.1	27968	29695.7	23391.9	22993.2	22847	35791.5	24480.1	16014.1	22625.6	21867.1
Snrpe	A_51_P363630	15393.6	26895	20182.9	19016.6	24364.2	26068.5	25938.5	28906	25329.9	20110.6	29642.1	26752.1	26187	41169.8	31508.1	29121	33393.2	29640.9	19854.2	23625	33571.5	20728.6	15393.6	24405.6	26831.1
Snrpg	A_55_P2007303	21276.1	38175	28412.4	21276.1	31522.2	33669	27115	45281.5	31812.4	30160.6	45070.1	33661.6	37561.5	52737.3	55969.1	39441	48260.2	43103.4	30383.2	29977	54368	29741.1	23256.6	27810.1	32759.1
Snrpg	A_55_P1990081	21124.6	39397.5	26605.9	21794.6	29025.2	29826.5	26425.5	38629.5	31441.9	27647.6	43378.1	35500.1	33511.5	52513.8	55298.1	36930	42402.7	43933.9	29322.2	30439.5	53256	26635.1	21124.6	27694.6	29889.1
Snx17	A_51_P225083	13630.6	20460.5	20652.9	13630.6	25792.7	24214.5	22696.5	30682.5	25186.9	29326.6	30045.1	22796.6	24148	20996.8	19232.1	21972	24534.7	24096.9	30092.7	27461.5	21295.5	23776.1	19260.6	24552.6	21540.1
Sod1	A_55_P2177539	45374.1	78469	62339.9	45374.1	64312.7	62906.5	52560.5	75240	63461.4	59407.1	82667.1	62963.1	63094	56077.8	68963.1	61510.5	60561.2	59543.9	55630.2	52714.5	82235.5	57558.1	51617.6	55143.1	50189.6
Sp110	A_55_P2066792	19702.1	32882.5	35068.9	19702.1	51139.7	53097.5	66651.5	37495.5	52518.9	28694.1	38122.6	61484.1	38816	77890.8	38465.6	30059	34499.7	52896.4	56247.7	74949	48916.5	34729.1	28546.6	82728.6	46631.1
Spcs1	A_51_P149775	27773.1	56942.5	42664.4	27773.1	40635.7	41168.5	36491.5	50727	36825.9	48565.1	54953.6	41431.1	46736	37029.8	31225.1	37547	40151.7	62590.9	56051.2	54846	41848	50394.1	42398.1	37984.6	39208.6
Spg7	A_55_P1955706	18809.5	27880.5	26879.9	18964.1	20748.7	18809.5	19458.5	28305.5	25638.4	21503.6	25669.6	21650.1	19817	31120.8	21642.1	21113.5	21446.2	22886.4	24765.7	22164	28375.5	24075.1	20161.1	28827.6	24574.1
Spna2	A_55_P2072985	18641.2	36545.5	39876.9	29434.1	24330.7	25426	27052.5	37182	37328.9	42257.1	42741.6	33264.6	41350.5	40736.8	31672.1	21577	18641.2	22891.9	26560.7	24014	35956.5	44095.1	33979.6	25596.6	29886.1
Spnb2	A_55_P2081223	29103.7	77733	79965.9	55069.1	54381.2	61284	77170	56898	61561.4	61032.6	83826.1	77448.1	97479	49675.8	39997.6	30741	29103.7	55073.4	61455.7	50958	55813	100611	93304.6	40031.6	39534.1
Spns1	A_55_P2018919	15242.1	22187	23769.9	15242.1	29943.7	27628	28310	32441.5	29881.9	24522.6	28337.1	24753.1	24785.5	33868.3	22021.1	26655.5	25009.7	29065.9	30454.7	30341.5	27186.5	26806.6	24789.6	37682.1	34060.6
Sra1	A_51_P226053	16339.6	27998	20325.9	16339.6	23829.7	23744.5	21205.5	30027	25081.4	22989.1	30817.1	25420.1	24101	21203.8	22214.1	23174.5	24254.2	27848.9	28508.2	29407	26325.5	25575.6	19681.6	27228.6	29137.1
Srp14	A_51_P111544	11189.9	20712.7	14280.5	11760.9	12857.9	13667.6	12450.2	16031.4	14607.5	16480.2	16890.6	15502.7	14250.5	14612.5	12981.6	11189.9	11863.5	19608.9	15235.6	15532.9	14249.8	15704.8	13833.4	15057.4	13551.3
Srrm1	A_55_P1973387	10060.6	16178.5	14981.9	10060.6	17397.7	15854.5	15054.5	17516	14125.9	13744.1	17255.1	13596.6	15752	26435.3	19769.1	16606	15833.7	16433.9	16580.7	12677	26047.5	17958.6	14792.6	16148.1	15201.6
Ssb	A_55_P2139913	10330.1	17200	13266.9	10330.1	14843.2	16939.5	12181.5	18833	12491.4	13797.6	17553.1	14179.1	14170	19774.8	17321.1	19148	17803.7	20001.9	13247.2	12685	19457.5	14187.1	11459.6	11520.6	14033.1
Ssr1	A_55_P1962831	15875.6	21603	20836.4	19422.1	26408.7	24673.5	26336.5	28258	26646.4	22765.1	26238.6	25461.6	21361.5	34109.3	29683.6	30004	29974.7	26505.4	22816.7	20718.5	33166	23049.1	15875.6	31086.6	32400.1
Ssr3	A_51_P416556	14640.5	29105	22935.9	16260.1	16950.7	16139.5	14640.5	25842	19983.4	24022.6	24520.6	17602.1	21029	28576.8	35002.1	22026.5	21302.7	20302.4	20320.7	17024.5	39972.5	27897.1	20751.6	25306.1	23599.6
Ssr4	A_52_P546090	17718.1	35184.5	26361.9	17718.1	35207.7	35893.5	29134.5	36209	28051.4	34365.6	38681.6	27209.1	29474	22355.3	29759.6	36566	36183.7	40952.9	29962.7	28266.5	32019	31263.1	25929.1	26037.6	30519.6
Ssrp1	A_55_P2036633	14098.1	22513	21508.4	14098.1	30711.7	30119.5	29005.5	34477	29939.4	23655.6	32443.6	26815.1	26284.5	36048.3	31150.1	35783	35468.2	21562.4	21981.2	20755.5	43981.5	19978.6	15185.1	35894.1	31752.1
Ssu72	A_65_P19623	10557.6	14846	10934.9	11480.1	13327.7	12081	13753	14908	14304.4	11622.6	14073.1	14328.1	11543	20049.8	14582.1	11630	11843.2	12574.9	12190.7	14864.5	14352	13053.1	10557.6	13001.6	13557.1
Stx4a	A_55_P2156741	17499.1	23591.5	25215.9	17499.1	30782.2	30928.5	27661.5	34040.5	29809.9	28035.1	35504.1	32983.1	34308.5	27106.8	19920.1	22382.5	19770.7	38587.9	37184.7	33132	29919.5	33225.6	27647.1	34721.6	29779.6
Stx5a	A_55_P1962951	14023.1	19299	17295.9	14023.1	18688.2	18879.5	15416.5	23262	21494.9	20248.6	27918.6	20085.1	24318.5	17738.3	14371.6	17460	17052.2	27839.9	34134.7	27532	18132.5	23640.1	20628.6	21234.6	21996.6
Sub1	A_55_P2186287	25178.1	47837.5	34287.9	25178.1	25727.2	30262	26694.5	42902	30740.4	27056.6	36482.1	34171.1	34861	46718.3	33585.1	26124	30986.2	34858.9	26336.7	27830.5	45284.5	29301.1	31117.6	26283.1	30559.1
Sugt1	A_51_P396774	15665.6	32318	22786.9	15665.6	25204.7	25873.5	23086.5	29471.5	24437.4	22866.1	28134.1	24024.1	24902	30146.8	23192.1	24707	24042.7	26643.4	24376.7	23592.5	28273.5	23432.1	18763.1	26286.6	26886.1
Sumo1	A_55_P2002155	19140.6	32311.5	21094.4	21878.1	26160.7	27145	27083.5	28830.5	25658.4	19140.6	27649.1	24684.6	22706	37207.3	24523.6	26409	27193.7	36117.4	25184.7	27416	30481.5	25272.1	21375.6	31974.6	30632.1
Sumo2	A_55_P2156002	35305.1	57742	43183.9	35305.1	45128.7	47005	44035.5	54465.5	50139.4	38190.6	52665.6	47434.1	47482.5	63863.8	49154.1	53229.5	52383.7	54190.9	44234.7	45505.5	63444	43973.1	39963.6	44484.1	47225.1
Sun2	A_55_P2021119	11071.6	19947	20546.9	15678.1	18077.7	16380.5	18780.5	16966.5	21823.4	25487.6	20776.1	19471.1	22957.5	12546.8	11071.6	22703	20992.7	22887.9	28589.7	22628	12324	20385.1	17204.6	18949.6	14920.1
Supt5h	A_51_P429983	11867.5	20854	17965.9	12723.6	17674.7	15120.5	11867.5	23756	16668.4	20886.1	24977.1	14810.1	18616	18875.8	17364.1	16303	15559.7	17850.9	20977.7	13683	23225	22290.1	15196.6	20225.6	14846.1
Surf4	A_51_P115326	19183.1	29023	29769.9	20177.1	35781.7	32486.5	41985.5	36763.5	37028.4	30398.6	36563.1	41791.1	32000	32656.3	19183.1	38435	37609.7	30224.4	31978.7	34074	35433.5	29836.6	23291.6	49936.6	51282.1
Syngr2	A_55_P2106235	11289.1	16632.5	14067.4	11289.1	16199.7	14280.5	14607.5	23168	20260.9	22105.6	21535.1	18201.1	16699.5	23883.8	17714.1	12454.5	12897.7	17575.4	24039.2	21164	18219.5	20966.1	15932.6	13363.6	11381.1
Synrg	A_55_P1968606	177945	194239	184621	193105	182664	181409	193810	203192	202752	190795	212507	197920	188915	224026	185040	187713	177945	189187	184899	186226	203522	199011	181229	217990	203587
Syvn1	A_55_P2015734	13846.1	18686	18985.9	13846.1	22925.7	22254.5	23163.5	25031	26346.4	23924.1	27933.1	24822.1	18980	23940.3	17617.1	21494	20406.2	23225.9	26627.2	24439	26066.5	19679.1	17471.6	29766.6	32353.6
Taf10	A_66_P120260	14871.6	25824	20299.9	18963.1	31220.2	26824.5	24709.5	40343	28217.4	33504.1	39879.1	27504.1	31001	32790.8	40235.1	27768	33775.7	26925.4	27280.7	29860	31484	20728.1	14871.6	26543.6	27197.6
Tagln	A_51_P450527	205902	356129	331616	313597	216438	231613	205902	346433	318735	351332	343184	293873	297699	281609	311163	308156	287515	237816	227885	229324	322058	326509	308778	252605	284154
Taok1	A_55_P2250249	17458	20032.5	26263.9	18071.1	22733.7	25973.5	27592	25408.5	26566.9	23971.6	22087.6	116358	24155	33046.3	20249.1	23700	21699.7	24728.9	18064.7	17458	27092.5	25595.1	24538.6	25013.6	23628.6
Tardbp	A_55_P1980180	17135.1	32143	25750.4	18541.1	24664.7	29921.5	31223.5	37011.5	33076.4	25742.6	32192.1	30826.1	24528	46212.8	34942.6	38697	40310.7	25095.9	21520.7	19569	50055.5	19447.6	17135.1	31546.6	34699.1
Tax1bp3	A_55_P2133716	36025.6	48986.5	44947.9	36025.6	48146.7	46091.5	44209.5	45200	48072.9	41160.6	50374.6	49322.1	40878.5	57182.8	37907.1	36157	41136.7	51552.9	46652.7	49552	43352	42325.1	46845.6	45545.6	44116.6
Tax1bp3	A_55_P2046158	22662.1	36265	32771.9	22662.1	34642.2	34543.5	32602	34710	31351.4	30249.6	37533.1	99166.1	30488	35080.8	25200.1	26764	29080.7	40564.4	35259.7	37496.5	32722.5	30016.1	33357.6	27782.1	28702.1
Tbca	A_55_P2056315	12839.1	23704	16515.9	12839.1	13560.7	16025.5	15416	19257	14977.4	17625.1	17440.6	15539.1	17426	20980.8	17482.1	14157	14486.7	22915.9	16584.7	14979	19210.5	15159.1	14687.6	14169.6	14373.6
Tbrg1	A_55_P2021555	40518.6	57435.5	53412.9	40518.6	68019.7	69771.5	68895	97543	69669.4	63012.6	91217.6	77099.1	72330	74860.8	58486.6	65408	67832.7	66844.9	75743.7	72320	82734.5	63280.6	44654.6	58377.1	70502.1
Tceb1	A_55_P2171373	15362.6	34330.5	24737.9	21219.6	22277.7	23031.5	19343.5	36416	23856.4	26812.6	34319.6	25017.1	23946.5	33642.3	28316.6	31052	32843.7	23373.9	16552.7	17005	35107.5	20709.1	15362.6	28938.6	33246.1
Tceb2	A_55_P1980932	56086.6	108772	68345.9	64058.1	74134.7	73940.5	61656	94400	68961.9	100911	106077	77506.6	84952	65750.8	83355.6	68813.5	79984.7	79613.9	71562.7	86817	77156.5	78926.1	56086.6	73875.6	79174.1
Tceb2	A_55_P2015692	27169.1	52995.5	34402.9	27169.1	37701.7	40173.5	30883.5	48611	33557.9	49497.6	50756.1	37080.1	43865	33759.3	43483.1	34814	40221.7	39346.9	38092.7	39173	39926.5	39688.1	29925.6	36535.6	38760.6
Tcf25	A_52_P123485	26285.6	35770	36028.4	26285.6	37412.2	36846.5	36002.5	40417.5	39401.4	37762.6	38181.1	37329.1	36907	44505.8	28043.6	35430	35920.7	42047.9	47255.7	41413	39018.5	46780.1	42331.1	40356.6	41331.6
Tcf25	A_55_P1969914	23642.6	27890.5	32539.9	23642.6	54507.7	54013	49722.5	52333.5	54356.4	44958.6	56903.6	45723.1	49899.5	42301.3	34530.1	51954	48657.7	37473.9	36210.7	34506	43672.5	34258.1	26061.1	58504.6	55542.1
Tcf25	A_55_P2035344	12121.1	16941	19749.9	12121.1	29459.7	24206.5	20869.5	26752	23896.9	28340.6	26567.1	19152.1	22359	25070.8	18398.1	23671	23377.7	18950.9	21485.7	17713	20285	20968.1	19454.6	24086.1	20591.1
Thy1	A_55_P2072035	25441.8	98434	55170.9	62984.1	56313.7	55129.5	47586.5	64808	154450	149059	154134	109243	131508	25441.8	48457.1	142997	148554	91430.9	92907.7	86681	59659	64445.1	31614.1	208291	163806
Thyn1	A_51_P323620	24202.6	58870	40822.4	26509.6	35511.7	37777	31712.5	45482	28752.4	35799.1	33150.1	26095.1	28479	38495.8	36598.6	31386.5	33505.7	36301.9	33178.7	29352.5	42339.5	27535.1	27502.6	24202.6	27839.1
Timm13	A_52_P338180	15150.1	29158	22118.9	16412.1	23565.2	23800.5	24416.5	35086	32018.4	27592.1	30624.1	26695.6	23920	34037.8	38735.1	30920	33271.2	21061.4	19869.7	24463	34940	20166.6	15150.1	33900.6	31237.1
Timm17a	A_55_P1956873	16769.6	40637	28533.9	19935.1	25285.7	25704.5	27463	42539.5	28645.9	33595.6	34440.6	28337.6	26865	43597.8	47334.6	35679.5	38364.2	23672.9	23699.7	25232	43472.5	23710.1	16769.6	28098.1	36054.1
Timm17b	A_55_P1970920	10119.1	14860	13135.9	10119.1	14634.2	13193.5	12002	15963	15165.4	17305.1	18947.1	14723.1	16206	12297.3	13019.1	15398	15764.7	19113.9	16856.2	18867	15392	12760.1	11628.1	12668.6	13839.1
Timm23	A_55_P1971194	12100.6	17055	17547.9	12284.1	21407.7	22337.5	21405.5	27755	19264.9	18914.6	21134.1	16685.1	18183	28317.8	26255.1	26564	27494.2	17935.9	17090.7	18285	28813.5	18161.1	12100.6	21172.6	26036.1
Timp1	A_55_P1985850	82466.6	150965	124816	96568.1	159216	155150	151211	137503	146280	103896	145234	105733	96435	144957	174421	189467	179104	103845	111006	104011	196296	125370	82466.6	135851	162667
Timp2	A_65_P12392	13583.1	43644	42052.4	23978.6	49126.7	47060.5	39257.5	37822	36311.4	61875.6	53045.6	41958.6	51168.5	20302.8	21515.1	20026.5	19336.7	39701.4	44771.2	39914.5	21985.5	46972.1	42693.6	14208.6	13583.1
Timp3	A_51_P463765	38100	61004	58632.4	48038.1	45109.7	41642.5	39552.5	137283	47431.4	91674.1	58987.6	66500.1	47719.5	51007.8	45261.6	53925.5	42830.2	40270.9	38314.2	38100	56547.5	90016.1	80045.6	46353.6	52608.6
Tkt	A_51_P394515	16699.6	40437.5	33709.9	16699.6	39098.2	34192	28346.5	40230	28998.4	34957.1	37425.6	29306.6	31212	42915.8	42313.6	41616	41388.2	25629.4	25197.7	22741.5	43113.5	31271.6	32459.6	37829.6	35210.1
Tln1	A_55_P1956973	53649	101241	108077	69694.1	79799.7	83029.5	87435	113104	108781	113924	124658	90442.1	106973	102729	92662.1	91247	79572.7	63954.9	67179.7	53649	120303	98870.1	88564.6	84445.6	89363.6
Tmbim1	A_55_P2035613	11008.1	18651	17085.4	11008.1	17959.7	15810.5	13012	17967.5	16068.4	21976.6	17162.1	14053.6	16045	13527.8	16951.1	11985	11450.7	16768.9	19122.7	13355	20993.5	17894.6	15061.6	13540.1	11289.1
Tmed1	A_55_P1983558	10014.6	15763	12307.9	10014.6	19446.7	19321.5	17543.5	19966	17697.4	16158.6	22337.1	17963.6	17860.5	15709.8	13519.1	19508.5	21108.7	24888.4	23095.7	22823	13464	14487.6	13698.6	12045.1	11329.6
Tmed10	A_55_P1983235	29427.1	42959	38965.9	29427.1	49007.2	49936	48284.5	54200	47057.4	40370.1	49195.1	45565.6	40892	61741.3	45695.1	50710	55021.7	48031.9	48866.2	49489.5	52159.5	48859.1	38291.1	56672.6	59173.6
Tmed2	A_55_P2098140	28460.6	34842	37076.9	32844.1	35165.7	38782	32935.5	48598	39419.9	41231.6	43033.1	33078.6	37754	42203.8	51083.1	44233	42281.7	34860.9	33803.7	29761	50414.5	38320.6	28460.6	46248.6	49305.6
Tmed9	A_51_P262878	36834.1	53737	45340.4	36834.1	68840.7	56278.5	71954.5	68210	58316.4	61387.6	70027.1	72431.1	53372.5	64984.8	66259.1	77711.5	72669.2	71425.9	59974.7	71814	60936	52957.6	44005.6	82466.1	74538.1
Tmem109	A_51_P114049	12915	21165.5	17530.1	12915	24040	23497.9	25307.9	30288.6	30704.8	25770.6	29009.5	28667.8	25220.5	25670.3	22204.7	27777.5	31217	21165.3	25094.4	24307.9	27600.9	20641	15767.1	31839.4	29623.4
Tmem132a	A_55_P2113081	13668.1	25820	21093.9	13668.1	24151.7	20864.5	22183.5	42986	32448.4	23896.6	29751.1	36282.1	21253	42203.8	25526.1	25839	29812.7	19798.9	22825.7	22737.5	35097.5	18083.1	16898.1	44313.1	38549.1
Tmem208	A_51_P213153	12712.1	20270	15235.9	12712.1	17533.7	16610.5	14126.5	21096.5	18719.4	17614.6	21141.1	17505.1	18172	19466.3	18450.1	17679	17856.7	14931.9	15164.7	14373.5	19794.5	19034.1	15607.1	19190.6	18378.6
Tmem49	A_52_P127362	21783	36012.5	24687.9	27185.1	22670.2	21783	23046.5	24506	28482.4	22112.6	33704.6	26168.1	28024.5	42102.8	35494.1	24114.5	22154.7	34382.9	35033.7	29429.5	38262	35686.1	25492.6	27051.1	28535.1
Tmem59	A_66_P121774	59671.6	97384	87219.9	62458.1	93375.2	81758.5	86813.5	98882	93056.4	77354.1	99302.6	87848.6	89539.5	93033.3	59671.6	74514.5	73935.2	132901	131292	117071	85537	116383	109857	120130	99183.6
Tmem63b	A_55_P2109932	10807.5	13025	15257.4	12862.1	11031.7	10807.5	11381	19290	15954.9	13182.6	15016.1	13235.1	12373.5	29079.8	20457.6	12112	12418.7	11829.9	17119.7	13144.5	22656.5	14543.1	12488.6	15697.6	15867.1
Tmem85	A_51_P215066	11928.1	22967	18893.4	11928.1	18527.7	17714.5	15979.5	25962	17342.9	18887.6	22819.1	17588.1	17813	28376.8	24888.1	18996	19109.7	18284.9	18440.2	18112	27550	21353.6	14798.6	17493.1	22339.1
Tmsb10	A_55_P2092085	55204.9	112755	79350.9	82672.6	67586.2	65890.5	57091.5	103601	70123.4	106426	100326	82531.1	89071.5	111742	132691	72081.5	68552.7	55204.9	55575.7	55766	110574	77119.6	55352.6	137297	125653
Tmsb10	A_55_P2168990	29721.7	63987	48636.4	49763.1	40986.7	36600	31973	62567.5	41160.4	65224.6	57099.1	48087.1	51400	69594.3	86771.1	41155	39022.2	29746.9	29721.7	31547	61758.5	46326.6	32133.1	84698.6	76811.1
Tnfaip1	A_55_P1957845	18576.4	27580	29154.9	21466.6	31040.7	32253.5	35075.5	34137	35181.4	28637.6	33986.1	35915.1	33560	34243.8	28162.6	24872	24539.7	18576.4	22228.7	20695.5	33964.5	26082.6	18624.6	23245.6	26918.6
Tnfrsf12a	A_51_P131408	12123.6	52280	45581.9	26470.6	28427.7	31652	23559.5	62442	25388.9	50110.6	46629.1	32147.6	36897	47999.8	69102.1	44527	47992.7	32709.9	43337.7	30977	70176.5	37765.6	24655.6	12123.6	32252.1
Tnk2	A_55_P2112125	31107.5	59861	74230.9	36762.1	31607.7	31107.5	35893.5	71928	55537.4	44618.1	65394.1	56873.1	51266	84288.8	81016.6	77016	75042.7	44340.9	60716.7	50032	97885.5	60602.1	37476.1	65546.6	74489.6
Tomm5	A_55_P2063598	17174.5	30693	24334.9	18121.1	21593.7	21779.5	17174.5	33081.5	23082.4	22996.6	28267.1	20989.1	23872	32886.8	34108.1	32447	29253.7	26346.9	19921.7	18358	37262.5	22899.1	18195.6	23091.6	22909.1
Tomm6	A_55_P1985569	23151.1	32334.5	25596.4	23151.1	29679.7	30009.5	28918.5	36902.5	32129.9	34565.6	39015.1	30013.1	25020.5	33423.8	32882.1	29074.5	33132.7	31581.9	27364.7	31290	31142	26543.6	24833.6	32663.6	33780.1
Tomm7	A_55_P2101133	18826.1	35556	24788.9	23499.1	26063.7	25241.5	19473.5	27471	22286.4	23570.6	28064.1	22293.1	24488.5	27688.8	28217.1	24243.5	28775.2	33320.9	21114.7	19509	29077	25463.1	24052.6	19389.6	18826.1
Tpi1	A_51_P433824	26408.1	43709	38712.9	26408.1	36972.7	36350.5	32654	65326.5	51693.4	46887.1	74262.6	48314.1	45450	39069.3	42688.1	44545	44087.2	41669.9	39437.7	43737	39459.5	45384.1	35623.6	75781.1	70435.1
Tpm3	A_55_P2090209	75846.6	140466	123881	98410.6	102716	108656	96004	151272	134401	108946	141019	124869	116394	176523	138994	120533	118065	95662.9	106970	94503	172465	103988	75846.6	105904	116252
Tpm4	A_51_P225592	65615.7	114098	81941.9	73774.1	65615.7	68826	72680.5	90973	81517.4	97335.1	101630	80165.1	83233.5	79199.8	85592.1	80449	73823.7	74179.9	68443.7	73838	96476.5	94279.1	65988.6	76875.6	83855.6
Tprgl	A_55_P2060101	17233.2	33572	29885.4	18927.6	23025.7	21504	19987.5	26249.5	26656.4	28230.1	31590.1	24795.1	30126	23539.3	17961.1	17682	17233.2	34884.4	35957.7	33538	23284.5	38927.6	33623.1	22154.6	21166.1
Tprkb	A_55_P1964218	15124.1	18721	18751.9	15124.1	20147.2	20057.5	18476.5	25415	22668.4	18853.6	24018.1	21446.1	22019	27924.8	20810.1	21055.5	19706.2	22489.9	21982.7	20783.5	23841.5	24590.1	21745.1	25829.1	22216.1
Tpt1	A_55_P2145879	235991	297125	275137	252116	284178	289935	235991	308154	279764	293745	320310	288089	295667	290747	280842	281742	267659	306389	273394	267228	304535	290323	273165	298784	261979
Tpt1	A_55_P2164221	215260	266301	215525	220243	251831	237490	229692	257394	259654	232542	280039	262611	248224	288370	239833	223513	215260	260197	219374	244421	264136	253457	221199	268065	248075
Tpt1	A_55_P2075013	116038	165064	139380	116038	158795	161148	148178	178725	165100	153099	190964	168286	180535	181760	158895	152981	140501	178182	153451	165826	178973	171191	146233	180700	169585
Tra2a	A_51_P513163	10568.1	17114	14134.9	10568.1	12948.2	13848	14975.5	17247	16155.9	12621.1	16687.1	15224.6	13597.5	22678.8	15750.1	18055	17690.2	18713.9	14338.7	14364.5	22147.5	14552.6	11727.6	16854.6	18879.1
Traf7	A_55_P2056035	15125.1	21950.5	25069.9	15125.1	24399.7	22987.5	22351	27678.5	26343.4	24413.6	30100.1	21379.1	22101	31491.8	27057.1	27494	26769.2	24844.9	26216.7	21851	35225	25116.1	22331.6	32408.6	31583.1
Trim35	A_55_P2127497	14156.6	23957.5	18716.4	15565.1	17445.7	16987.5	20350	27565.5	24041.4	19860.1	22337.6	22965.1	20041	21616.8	14156.6	19690.5	19731.7	23204.9	26645.7	29446.5	23331	24960.1	19231.6	32842.6	29747.1
Trim41	A_55_P1962339	13319.6	18586.5	24970.9	13319.6	23304.7	22020.5	20490	26972	20859.4	19373.1	24395.1	23925.6	25135	38134.8	19424.1	18839	17965.2	31996.9	27929.7	26223	24685.5	29157.1	24565.6	24547.6	28069.1
Trip6	A_52_P382914	17803.1	21402	22919.4	17803.1	27978.7	24953.5	25463.5	26860	30930.9	33717.1	31240.1	23648.1	24751	22507.3	20483.6	26105	28189.7	29022.9	27719.7	28058.5	23494.5	24886.1	22734.6	28184.6	26728.6
Trmt1	A_55_P1998081	11358.1	18288	16803.4	11358.1	16957.2	16205.5	15298.5	25868.5	20508.9	14770.1	23002.1	19031.1	18112.5	31019.8	27418.1	21210	22595.2	18868.9	19613.2	18748	30046.5	19109.1	14969.6	19568.6	21510.6
Trpc4ap	A_55_P2019257	23326.1	40129	37282.4	23326.1	40925.2	40033	38547.5	48886	42917.4	40114.1	51080.1	41078.1	41091	37389.8	30379.1	38549	39470.2	46035.9	51756.7	52934	45117.5	42508.1	36856.1	43562.6	43313.6
Tsen34	A_55_P2062029	33782.1	53215	63182.9	33782.1	80453.7	71321.5	78225.5	65810.5	68865.4	70524.1	71533.1	65561.1	59787.5	58504.3	52957.6	62475	68270.2	63521.4	52559.7	59034	65853	48808.1	48784.6	62283.6	56597.6
Tsen34	A_55_P2062034	30125.1	43877	54626.9	30125.1	72784.2	67160.5	74005.5	59227	62839.4	59387.6	59745.1	57004.6	56219	53588.8	48012.1	59623	58756.7	55056.9	47345.7	56105	56502	42934.1	46260.6	56080.6	51361.6
Tsen34	A_55_P2062039	16149.1	23313.5	21715.9	16149.1	32811.7	28082	23823.5	27219	30483.9	31531.1	31805.1	28361.1	24611	27500.8	21876.6	24300.5	25992.7	25364.4	21748.7	24899	25280.5	21807.6	19010.1	30131.1	20374.1
Tspan3	A_55_P2003793	17429.1	26867	22390.4	17429.1	27935.7	23069.5	26174.5	28061	29853.4	20546.6	27569.1	28531.6	24474.5	34827.8	18539.1	21532	19177.7	30612.4	28011.7	31384	25653.5	30941.6	24175.6	28055.6	25766.1
Tspan4	A_55_P2007713	14565.8	25557.5	23526.4	16387.6	35982.7	32922.5	28502	27943	30773.4	25322.6	33745.1	23540.1	24058.5	14565.8	17947.1	27768	30413.7	32133.9	32521.2	33374.5	22977	27563.1	21949.1	22909.6	20081.6
Ttc13	A_55_P1996573	11395.6	18657	18155.9	11395.6	16916.7	15023	13354.5	25025	16659.9	17042.1	18793.1	15349.6	16676	19587.8	15449.1	16834	16023.2	13377.9	15356.7	12048.5	22191	18273.1	13807.6	19584.1	17831.1
Ttc38	A_55_P2041673	248759	286829	277815	275435	255830	276195	263133	297440	267961	272664	318872	293454	288238	324510	266299	274147	248759	302210	284801	250019	313049	314054	298119	284401	274035
Tuba1a	A_55_P2115057	78382.6	125937	97420.9	80179.6	103649	99685	103822	104960	96964.4	99255.6	99593.1	85587.1	90388	101282	87453.1	91874.5	91384.7	78440.4	86893.7	84995	93796.5	82507.1	78382.6	94243.6	93017.6
Tuba1a	A_51_P169745	64378.6	127662	86143.9	77276.1	95365.7	88802.5	96032	97773	89838.9	89747.6	89263.6	78316.1	77589	96335.3	76966.1	80124	76309.7	71544.9	68631.7	78069.5	84522.5	73744.6	64378.6	86928.6	87574.1
Tuba1b	A_55_P2154132	166316	328372	255295	209784	300219	281786	282895	333614	320759	298400	324069	277351	268981	305262	303318	308615	316178	198147	205159	194762	342512	228336	166316	253261	249508
Tuba1b	A_55_P2116496	57916.1	144121	113519	57916.1	129821	120899	115695	141350	117307	144439	133971	91409.1	98765	131147	137938	124524	127658	82070.9	88359.7	84052	136866	88201.1	77553.6	96092.1	95573.1
Tuba1c	A_55_P2108837	63352.6	123994	109053	79708.6	113191	110257	127459	133093	125711	84438.6	113183	98051.6	76483	225793	182483	148829	155497	108907	129480	121306	198298	87447.6	63352.6	101800	125432
Tuba1c	A_55_P2064547	47052.6	95937	82997.9	56754.1	92860.7	83397.5	90002.5	101485	86462.4	69904.6	84851.1	66411.6	59265	177716	160591	106772	111006	85658.4	96509.2	83294.5	137488	70076.1	47052.6	73567.6	84570.6
Tuba4a	A_52_P676271	12412.1	27492	20819.9	21585.6	24376.2	20469.5	34807.5	28753	38168.9	25980.6	26868.1	29444.1	17814	50045.8	32104.6	24241	22468.7	16047.9	16744.7	29565	30212.5	16260.1	12412.1	33950.6	34318.1
Tubb2a	A_51_P490023	27445.1	85329	59281.9	40864.1	75514.7	71439.5	68507.5	47531	50864.4	59474.6	51947.1	44380.1	44272	32321.8	27445.1	43401	42622.2	47981.4	42912.2	43578	40479.5	42008.1	41315.6	32372.6	28887.1
Tubb2c	A_55_P2153292	34719.1	61543	49048.9	39419.1	63773.7	61450.5	56165.5	57289	53192.9	51286.6	61696.1	46432.6	41734	71181.8	63286.1	53057	50715.7	35050.4	40177.2	42200.5	64685.5	44522.1	35964.1	34719.1	35159.1
Tubb5	A_52_P163795	66652.1	127509	117593	85868.1	135405	128098	112410	144528	139027	151616	143140	93669.1	109500	126446	156791	150729	148422	97912.9	94725.7	90604	151127	78679.1	66652.1	123720	103946
Txn1	A_51_P424499	15034.1	30497	23825.9	28466.1	26280.7	26343.5	34553.5	31037.5	33303.9	24412.1	30920.1	34235.1	24711.5	51837.8	38962.6	29992	34126.7	19843.9	16022.7	24573	40694.5	22220.1	15034.1	35675.6	41407.1
Txn2	A_55_P1960231	14665.6	28072	23462.4	15965.6	27710.7	21775.5	17887.5	31708	21978.9	29682.6	30910.1	19860.1	23493.5	40522.3	42663.1	32574	36511.7	23173.9	24250.7	21933.5	41235.5	26206.1	14665.6	24328.6	28056.6
Txndc17	A_51_P349878	34062.6	49623.5	48734.9	34062.6	41688.2	46008.5	41304.5	54973	41189.4	39402.1	49181.6	47212.1	50125	59763.8	42118.1	45976	48804.7	54247.9	44487.7	49083	52727	41534.6	35593.6	40751.6	45229.6
Txnl4a	A_55_P2133751	10898.6	16512	14307.9	13896.1	14739.7	12289.5	18790.5	18380	21087.4	11859.6	16751.1	19175.1	12713.5	29600.8	15305.1	15952.5	15442.7	15044.4	14365.7	22746	18016.5	15248.1	10898.6	21789.6	23361.6
U2af1	A_55_P2059025	10443.6	19541.5	16746.4	13517.1	18684.7	16922.5	20879.5	25997.5	21730.4	18663.1	24443.1	20734.1	19649	30287.8	30777.6	26056	26582.2	21548.4	19270.7	17608	33611.5	15734.1	10443.6	23203.1	21600.1
Uba1	A_55_P1971966	39159.1	72412	65240.9	39159.1	57802.7	55974.5	58026.5	75768.5	67037.4	73947.6	77163.6	57057.1	61187	73473.8	83858.1	64526.5	65224.7	61425.9	67218.7	62846	85160.5	61041.6	49511.1	56390.6	69097.1
Uba52	A_55_P2069917	177360	216875	182976	177360	196953	183253	187159	217936	202642	200516	226171	196782	195907	205621	202954	207621	208221	222391	203035	231614	217740	194055	178913	223886	222966
Uba52	A_55_P2006340	166884	219943	179558	171083	204826	190325	166884	219469	194389	200900	232451	192090	193428	220429	236002	205371	206874	231270	215442	226636	224882	210086	167933	217603	210421
Ubb	A_55_P1965827	100266	166685	141404	100266	154370	138665	138731	161090	138673	169457	183928	141894	150053	142803	119007	132985	123882	167558	172538	165911	149617	168980	155260	139979	139208
Ubb	A_55_P2038952	50087.1	71527.5	59628.9	53162.1	71175.7	67291.5	69537.5	69049	73819.9	61992.6	77871.6	78397.1	64329.5	85110.3	50087.1	61879	56566.2	78957.9	72412.2	85133	64756.5	79255.1	61649.6	77958.1	71705.1
Ubc	A_55_P2143075	152214	188740	176115	154122	175812	160703	171313	204085	178381	162392	219793	197892	176339	199722	153346	152214	152336	182647	200274	194218	195644	209278	177435	174019	180979
Ube2b	A_51_P244690	10746.5	16233	12663.9	12203.6	11628.2	11423.5	11255.5	15463.5	15428.4	12270.6	17082.6	16021.1	14464.5	18374.8	12580.1	10746.5	11037.2	19587.9	14607.7	19543	15539.5	16404.1	12545.1	13621.1	17898.1
Ube2i	A_55_P1984721	10413.1	18807.5	16738.4	10413.1	15939.7	13814.5	13844.5	20359	18616.9	11661.6	17415.1	18017.1	14879	26969.8	18505.6	16706	16683.2	19398.4	23490.7	17918	24865.5	17474.1	14337.6	20033.1	17868.1
Ube2j2	A_66_P111437	21441.6	28536	28074.9	21441.6	27114.7	27824	31144.5	41517.5	35260.9	29807.6	34396.6	31117.6	28661.5	43428.3	37322.1	35589	38417.7	27650.9	27934.7	29684	45244	28438.1	23896.6	39183.6	40304.1
Ube2l3	A_55_P2120278	14140.6	27323	25435.4	14140.6	19948.2	19926.5	18590.5	28301	23611.4	23704.6	28644.1	20728.1	23430	23101.3	19561.6	21915.5	22725.7	29932.9	33221.7	30080.5	26029.5	26857.6	23692.1	22729.1	22851.6
Ube2v1	A_55_P1990525	31584.1	51795.5	49438.4	31584.1	47044.7	40230.5	43327.5	54538	56319.9	48558.6	55171.6	48856.1	39642	62533.8	46183.1	38575.5	40510.7	47201.9	45912.2	48665	55321	50667.1	37787.6	45928.6	48576.1
Ubl5	A_52_P457411	13890.6	26707.5	17658.4	13890.6	22029.2	19977.5	15188	21741	17140.4	23543.6	24742.6	16945.1	20956	22236.3	25045.6	15406.5	16866.2	25220.9	24488.7	20606	19142.5	22213.1	18596.6	16472.6	15814.1
Ubtf	A_55_P1992680	18012.1	27617	30455.9	18012.1	44008.7	44960.5	58320.5	34814	47953.4	26088.1	34579.6	55092.1	34370	68342.8	32206.1	27022.5	32083.7	47376.9	48811.2	65179	43194.5	31139.6	25733.6	74564.6	40661.1
Ubxn1	A_52_P568805	17654.1	25034	23178.4	17654.1	23658.2	22462.5	19236.5	27415	24468.4	26479.6	28734.1	22746.6	24592	26243.8	24874.6	19537.5	20084.7	25485.9	25087.7	22802.5	24537	23477.6	21683.6	26632.6	20728.1
Ufc1	A_55_P1975011	15592.6	25669	20627.9	15592.6	24125.7	22907.5	21338	25732	23127.4	23639.6	27558.6	23505.6	23831.5	23514.8	15740.1	20399	20387.7	30903.9	27361.2	28789	23313.5	26086.6	24041.6	20826.6	22347.6
Uggt1	A_55_P2016089	12689.1	17246	20559.9	12689.1	21404.7	22248	21555	31777	28290.4	23218.6	26280.1	20268.1	22103.5	21767.8	16038.1	26762	24910.2	22770.4	28026.7	22175.5	26754.5	23628.6	21992.6	30891.1	30347.1
Uqcr10	A_55_P2166414	23258.1	40030	28219.4	23258.1	23415.2	25036.5	23371.5	34647	30696.4	27551.6	32824.1	27330.6	26022	32469.8	35117.6	28138	28279.7	31990.9	25066.7	24595	36283	27340.1	23403.1	27144.1	26836.1
Uqcr10	A_55_P2157705	18090.5	33619	24561.9	19423.1	20625.7	21824	18090.5	29576	24439.9	22950.6	29636.1	22805.1	23652	26929.8	31833.1	25799	24275.2	28540.9	21856.7	20137.5	31097.5	23933.1	20745.6	22056.1	21979.1
Uqcr11	A_55_P1961983	29800.1	52166	35419.9	32790.6	33748.2	32430	30870.5	40134	38145.9	36434.6	42198.1	34194.1	31090.5	37548.8	41264.6	32391	32634.2	37876.9	30216.2	32827	37840.5	30480.1	29800.1	34210.6	30673.1
Uqcr11	A_55_P1979743	20924.6	35767	24529.4	25266.1	23747.2	21288.5	23326.5	27679	30142.4	26382.6	29911.6	25602.1	22732	28510.3	30165.6	23500	22520.7	27282.9	22115.7	26564	25979.5	21901.1	20924.6	27492.6	23603.1
Uqcrb	A_66_P132663	18539.6	38528.5	23206.4	23983.1	29227.7	24728.5	24476.5	26303	24920.4	21383.1	27149.1	25933.1	23095	40039.8	34350.1	21078.5	21705.7	28188.9	21297.2	24678	25594.5	28570.6	18539.6	20649.1	22702.6
Uqcrb	A_55_P1965402	12953.6	22027	17011.9	17580.1	22234.7	17344.5	16610	19535.5	17488.9	14812.6	17422.1	17612.6	16309	34171.8	25115.1	15083	15545.7	20302.9	14083.7	17805	17858.5	21608.6	12953.6	13779.1	15779.1
Uqcrc2	A_51_P128648	12527.3	20862.3	15663.2	12720.7	14346.4	14993.4	13203.5	23711.2	16018.8	16327.1	20418.9	14637.8	16286.4	24317	19530.1	15904	16542.8	17192.9	16738.6	16644.3	23303.8	17488.5	12527.3	17689.4	17954.4
Uqcrh	A_55_P1965427	57351.1	85724	57736.9	57351.1	57962.2	61686.5	59219.5	65973.5	66613.9	61254.6	72556.6	70329.1	63340	70326.8	60708.6	59739	62054.7	92805.9	62926.7	74582.5	61675	57875.1	60715.6	58244.1	59496.1
Uqcrh	A_55_P2052470	26843.1	45629	29581.4	28445.1	29824.7	31551	29247.5	33431	33996.9	32050.6	38524.1	34729.6	30441.5	34943.8	31334.1	29274	29144.2	49851.9	33461.7	36129	31593.5	29006.1	29115.1	31248.6	26843.1
Uqcrq	A_55_P1965378	56982.6	103836	70836.4	60119.1	74965.7	72909	65014.5	102058	74340.4	64863.6	91848.1	72712.6	69990	91689.3	85388.1	86253	92325.2	73571.9	61590.2	68973	100179	77024.1	56982.6	91468.6	93748.6
Usmg5	A_51_P181365	20147.5	50658.5	32450.9	30176.6	21861.7	27257.5	20147.5	39515	31244.4	31933.6	38228.6	31213.6	30599.5	35691.8	43895.1	29623	30392.2	42616.9	27352.7	24350.5	43642.5	31250.6	26543.6	24477.1	28563.1
Usp14	A_55_P2088725	13869.1	22234	22431.9	16629.1	17910.7	18254.5	17925.5	29932	21384.4	20251.1	22596.6	17177.6	19565	30346.3	29146.1	24989	23826.7	15571.9	15699.7	14592.5	34253.5	18276.1	13869.1	19810.6	22926.1
Utp6	A_55_P2041265	33937.7	46334.5	45713.4	63669.1	35765.7	40307.5	60626.5	54569	67258.4	35414.1	50155.6	68068.1	41996	90442.8	54084.1	44419	40241.7	37371.4	33937.7	40267	70004.5	52697.1	41970.1	72217.1	73900.1
Vapa	A_51_P361788	17926.5	29464	24029.9	25075.6	21580.2	20870.5	23074.5	23627.5	22582.4	20289.6	19855.6	20662.1	17926.5	27125.8	20204.1	21643	23240.7	25964.4	24408.2	27419	25035.5	25257.6	25131.6	30505.1	26884.6
Vcp	A_55_P1961645	30210.1	43124	45614.9	30210.1	38176.2	37804	41602	49271	45638.4	48330.6	43334.6	45723.1	39805.5	49984.8	41109.6	41924	41967.2	35376.4	39443.7	38840	50878	40843.1	36440.6	42334.1	41285.1
Vdac1	A_55_P1992445	42057.1	72740.5	64091.9	42057.1	51755.7	52405.5	50057.5	76840	50866.4	53736.1	69428.6	53832.6	58900	62020.8	59491.6	53680	58804.2	53315.9	49222.7	46273	77793	63602.1	46561.1	51851.6	54237.6
Vdac3	A_55_P1992455	31548.6	48824	45208.9	33151.1	45266.7	44303.5	43216.5	55639	54469.4	41696.6	50852.1	45355.1	44163	54173.3	40573.1	53043	47262.2	43778.9	37102.7	42097	59437	43607.1	31548.6	53676.6	52757.6
Vim	A_51_P392687	53052.6	91742	75924.4	84412.1	85660.2	79731.5	95466.5	91857.5	89923.4	86642.6	85847.6	91696.1	75204.5	110893	83615.1	76841	68144.7	98122.9	88628.7	110413	99395	67673.1	53052.6	87662.6	80813.1
Vopp1	A_55_P1970120	10788.1	17241.5	16694.9	10788.1	15975.2	15267	16156	20837	17697.4	14869.6	16998.1	15833.1	13732	26589.8	15793.1	14995.5	14589.7	23477.9	22498.7	21609	19312.5	16909.1	16821.6	24815.1	20987.1
Vps28	A_51_P150394	21399.6	33045	23793.9	21399.6	27252.2	26873.5	26736	31959	31584.4	28611.6	33225.1	30261.6	28403	27651.8	24487.1	24943	28359.7	37289.9	38509.2	46776.5	26106.5	31918.1	28129.6	29910.6	29697.6
Wasf2	A_52_P581440	13364.5	13364.5	18578.4	15588.1	20397.7	20500.5	19105.5	23666	24522.4	23591.1	22491.1	18618.1	17999	19550.8	14215.6	19927.5	20460.7	24105.9	19333.7	27349	15650.5	15326.6	17592.6	25633.6	20976.6
Wbp1	A_51_P160372	10135	21559	16474.9	10585.6	15511.7	12624	11162.5	15386	13916.9	13076.1	19300.1	13520.1	16395	16517.8	10525.6	10135	10699.7	22180.9	23235.7	21122	13356	19822.6	19302.6	13025.6	12157.1
Wdr1	A_66_P135742	17026.6	34852	34949.4	22290.6	20766.7	23093.5	24104.5	39843	31330.9	34713.6	37815.1	29383.6	33727	34227.3	26775.6	29327.5	30214.7	19877.4	21717.7	22156.5	34507	23009.1	17026.6	23557.6	31445.1
Wdr34	A_55_P2157676	39577.7	44737	45739.9	41726.1	46755.7	52508.5	56695.5	59770	54040.4	40945.6	52652.1	65340.6	50077	83825.3	41435.1	41314	39577.7	46065.9	45524.7	48472.5	58313.5	65555.1	56032.6	64610.6	64909.1
Wtip	A_52_P481686	11932.6	19843.5	17922.4	11932.6	15614.7	14331.5	12560.5	24511.5	16543.4	21492.6	22702.1	17203.6	20672	15123.8	15747.6	13508.5	14527.7	13642.9	18031.7	14174	27947	23160.1	16476.6	14321.6	12451.1
Xbp1	A_55_P1994032	24007.1	35864	34279.4	24007.1	40781.2	37255.5	36965.5	58296	51461.4	38153.6	53636.1	44219.6	44170.5	37829.8	31419.1	48820	48986.7	47547.9	51144.7	51557	55698.5	47030.6	35776.1	47832.1	54498.6
Xpnpep1	A_55_P1997275	14661.1	26568	22053.9	14661.1	27949.7	24939.5	25315.5	33814	28197.4	22848.6	32792.1	26380.6	25733	37169.8	27187.1	29346	30140.7	21831.9	25679.7	28655	38693	23412.6	16479.6	34606.6	39573.1
Yap1	A_55_P1953459	14201.7	17789	19978.9	17816.1	16422.2	16060	15302.5	24911	27292.4	17743.6	23444.6	23894.1	21702	25309.8	22762.1	18892	17943.7	15821.9	14201.7	14760	24021	24941.1	19385.6	25610.6	23858.1
Ybx1	A_52_P187132	18570.5	30352.5	29379.9	24796.6	28146.7	27128.5	18570.5	43280	27739.4	41673.6	40418.1	27951.6	36342.5	42706.8	76268.1	35625	35629.7	26544.9	24806.7	22514	48801	27751.1	19792.6	32441.6	33356.1
Ybx1	A_55_P2044045	14838.6	30601.5	26102.9	22004.1	25467.7	22021.5	26523.5	35337	29595.9	31579.1	34617.6	27162.1	30444.5	44171.3	41541.1	27720	26058.7	23780.9	22926.7	18795	40972.5	21234.6	14838.6	32212.1	33135.1
Yif1b	A_55_P2102322	30833.6	40690	38269.9	30833.6	59876.7	58426.5	54743.5	61631.5	52358.4	67656.6	57002.6	46288.1	48999.5	31179.8	42165.1	48489	51765.2	32977.9	38987.7	43927.5	37348.5	36992.1	31587.6	43044.1	49216.6
Ywhae	A_55_P2124120	31059.6	69685.5	50417.4	44613.1	52375.7	50337.5	45399	71941	53672.4	60463.6	73810.1	53275.6	58034	63477.8	73884.1	55232	56138.7	45730.4	50232.7	50997	72444.5	49744.1	31059.6	46381.1	50874.6
Ywhah	A_51_P306527	31734	44859	53176.4	37030.1	44746.7	44933.5	46862	56177.5	47475.4	48026.1	45738.1	42212.1	44000	65853.8	57668.1	43456	42185.7	32461.9	32503.7	31734	57625	38976.6	32187.1	39935.6	48880.1
Ywhaq	A_55_P2142296	33224.6	58631.5	48536.9	35394.6	39610.7	36510	40947	47743	48200.9	45755.1	50486.1	37081.1	42847.5	67414.8	48087.1	40429	42000.7	36439.9	33968.7	33588	56871	42800.1	33224.6	37096.6	40239.6
Ywhaq	A_55_P2142298	33025.9	66741	49144.9	34428.6	41097.7	38776	40111.5	48838.5	42253.4	44149.1	52330.1	37803.1	42711	57863.8	51541.1	42825.5	45704.7	33025.9	33900.7	33459	57290.5	38528.1	34169.1	38287.6	39940.1
Ywhaq	A_55_P2182159	20916.2	41237	32381.9	23830.6	26160.2	26747.5	29320.5	32948	32911.4	28089.6	34564.1	26294.1	30480.5	47318.8	33299.6	29569	28980.7	21334.9	20916.2	22970	39232.5	25692.1	22575.6	28195.6	28614.1
Ywhaq	A_55_P2178349	10858.7	20878	18184.9	13827.6	15928.2	15856.5	17183	17602	18579.4	16190.6	18699.1	18541.1	15974	30006.8	15910.1	18233	19739.7	15236.4	10858.7	14552	19220	13858.1	13989.6	15549.6	17044.1
Zbtb7b	A_55_P1989816	10429.6	12140	12237.4	10615.6	14740.2	11543.5	12862.5	16022.5	16517.4	14982.6	15229.1	14862.1	13227.5	19265.8	15181.1	15140.5	13831.7	14699.9	16688.2	20385	14778	14997.1	10429.6	20348.6	18233.1
Zc3h11a	A_51_P235117	18455.1	20324	23621.9	18455.1	20037.7	21040.5	23384.5	26778.5	27277.4	23164.6	30099.1	24208.6	25956.5	33247.3	19126.1	23143.5	20115.7	25034.4	19719.7	22533	27128.5	27951.6	26268.6	32104.6	29887.1
Zc3h11a	A_51_P187716	12826.7	16753.5	17494.9	14054.6	12826.7	15188	14613	19848	18720.4	17981.1	19005.6	16260.6	19600	17397.8	18812.1	15907.5	14887.7	17867.9	18644.2	15222	23160	24218.6	20652.6	25509.1	18565.1
Zcchc9	A_55_P2146708	10077.6	17822.5	19485.9	10077.6	29690.7	31890.5	36822.5	22962.5	28143.4	16471.6	21876.6	32602.1	23104.5	39941.8	20705.6	18399	19056.7	28504.9	29108.7	43947	26735	18826.1	16930.6	47790.1	26108.1
Zdhhc18	A_55_P1953650	11348.1	17212	19426.4	11348.1	19698.2	20665.5	18650.5	27341	23134.4	21528.6	21824.1	16373.1	15770	27133.8	21809.6	23021	23669.7	17963.9	23088.2	17228	32761.5	19548.1	14877.6	24458.1	24444.1
Zfp408	A_55_P2093940	93612.2	114116	102893	124127	102824	108661	111533	136185	122951	103829	121639	128343	107687	150864	116169	114873	99784.7	104815	93612.2	94279	123457	118143	104956	133581	125820
Zfp622	A_66_P122087	20209.1	34127	31379.9	20209.1	28512.2	26269.5	26119.5	42789.5	35660.9	28056.6	38887.1	33645.6	32619	47023.8	37330.1	33083	33562.2	38105.9	37056.7	36460	47360.5	35117.1	28069.6	35857.6	32157.1
Zfp771	A_55_P2014269	17977.1	25204.5	23243.9	17977.1	26407.7	23725.5	22841.5	34159	28681.4	32330.6	33575.1	27933.1	26895	21887.3	22697.1	22707.5	23882.7	23365.9	26512.7	27328	26142.5	27954.1	22080.6	25541.6	22851.6
Znhit1	A_66_P131708	13335.6	19955	16466.9	13386.1	19128.7	17564.5	15708.5	21613.5	18332.4	19659.6	22939.1	17317.1	17191	20972.8	20749.1	16617.5	17381.7	18388.4	19478.7	18418.5	19115	17777.1	13335.6	21155.1	16887.6
Zwint	A_51_P163378	17304.1	35271	32780.9	17304.1	25334.7	25086.5	25458.5	40812	27390.4	27164.6	32413.1	27253.6	26814.5	44233.8	32708.1	30894.5	28436.2	26302.9	22853.2	23661	50860	31797.1	28129.1	23728.6	34743.1
Zyx	A_55_P2016852	49830.1	112020	111909	80034.6	96732.7	93145	92733.5	176782	135531	151953	184052	113169	132067	95406.3	136331	130604	128504	117138	144597	120792	149077	112559	49830.1	85421.6	112766

## Sheet: genes by cellular process
© 2000-2016 QIAGEN. All rights reserved.
Categories	Diseases or Functions Annotation	p-Value	Molecules	# Molecules
Carbohydrate Metabolism, Small Molecule Biochemistry	synthesis of lactose	2.68E-02	AKT1,B4GALT1	2
Cell Cycle	interphase of fibroblast cell lines	1.97E-03	AKAP12,AKT1,CDK4,COPS5,CSF1,CSNK2B,GPI,GTF2I,HDAC1,JUN,KLF6,LMNA,PTPN11,RAC1,RHOA,SUN2	16
Cell Cycle	interphase	1.58E-02	AKAP12,AKT1,ANXA2,AXL,CAPNS1,CCND2,CDK4,COPS5,CSF1,CSNK2B,CYR61,DCC,GPI,GTF2I,HDAC1,HMGA1,JUN,KLF6,LMNA,MDM2,MTCH2,PAM16,PTPN11,RAC1,RHOA,SUN2,TAOK1,TIMP2	28
Cell Cycle	G1 phase	2.94E-02	AKAP12,AKT1,AXL,CAPNS1,CCND2,CDK4,COPS5,CSNK2B,CYR61,GPI,JUN,KLF6,LMNA,MDM2,PAM16,RAC1,TIMP2	17
Cell Cycle	S phase	3.16E-02	CCND2,CDK4,COPS5,CSF1,GTF2I,HMGA1,JUN,MTCH2,PAM16,PTPN11,RHOA,SUN2	12
Cell Death and Survival	necrosis	4.38E-08	ACTB,AKR1B1,AKT1,ALDOA,ANXA2,APP,APRT,ATF4,ATF5,BAG1,BNIP2,CALR,CAPNS1,CCND2,CCT2,Cdc42,CDK2AP1,CDK4,CLIC4,COPS5,COX5A,CSF1,CSF3R,CTGF,CTSB,CTSV,CTTN,CYR61,DCC,DDIT4,DECR1,DNAJB1,EEF1A1,EEF1D,EGLN2,EHMT2,EIF3C,EIF4EBP1,EIF5A,ELK1,EMP1,ENO1,FAU,FDPS,FGFR1,FKBP1A,FLNA,FNTA,FSTL1,FTH1,GAPDH,GMFB,GNAI2,GNAS,GPI,GPX1,GSN,GSTP1,HAX1,HDAC1,HK1,HMGA1,HSP90AB1,HSP90B1,HSPA5,HSPB1,HSPE1,HTRA2,ILK,ITSN1,JUN…	136
Cell Death and Survival	cell death	4.55E-08	ACTB,ADD1,AK1,AKAP12,AKR1B1,AKT1,ALDOA,ANXA1,ANXA2,APP,APRT,ARHGEF2,ATF4,ATF5,AXL,BAG1,BNIP2,CALR,CAPN2,CAPNS1,CCND2,CCT2,Cdc42,CDK2AP1,CDK4,CLIC4,COPS5,COX5A,CRIP1,CSF1,CSF3R,CTBP1,CTGF,CTSB,CTSV,CTTN,CYR61,DAD1,DCC,DDIT4,DECR1,DNAJB1,EEF1A1,EEF1D,EGLN2,EHD1,EHMT2,EIF3C,EIF4EBP1,EIF4G1,EIF5A,ELK1,EMP1,ENO1,FAU,FDPS,FGFR1,FKBP1A,FLNA,FNTA,FSTL1,FTH1,GAPDH,GMFB,GNAI2,GNAS,GPI,GPX1,GPX4,GSN,GSTP1,H…	166
Cell Death and Survival	cell death of fibroblast cell lines	6.56E-08	ACTB,AKT1,APP,ATF4,CAPNS1,CDK4,CLIC4,COPS5,COX5A,CTSB,CTSV,CYR61,DDIT4,EEF1A1,EIF3C,EIF4EBP1,ELK1,ENO1,FNTA,FTH1,GMFB,GPI,GSN,GSTP1,HSPA5,HTRA2,ILK,ITSN1,JUN,KLF6,Ldha/RGD1562690,MDM2,MICAL1,OAZ1,P4HB,PARK7,PDIA3,PTPN11,RAC1,RELA,RHOA,RHOC,RPL10,RPL37,SMPD1,SUMO1,SUN2,TRAF7,TRIP6,TXN,UBA1,VIM,VPS28,XBP1	54
Cell Death and Survival	cell death of connective tissue cells	1.33E-07	ACTB,AKT1,APP,ATF4,ATF5,CAPNS1,CDK4,CLIC4,COPS5,COX5A,CTSB,CTSV,CYR61,DDIT4,EEF1A1,EIF3C,EIF4EBP1,ELK1,ENO1,FNTA,FTH1,GMFB,GPI,GSN,GSTP1,HSPA5,HTRA2,ILK,ITSN1,JUN,KLF6,Ldha/RGD1562690,LMNA,MDM2,MICAL1,OAZ1,P4HB,PARK7,PDIA3,PTPN11,RAC1,RELA,RHOA,RHOC,RPL10,RPL37,SERPINE1,SERPINH1,SMPD1,SUMO1,SUN2,TRAF7,TRIP6,TXN,UBA1,VIM,VPS28,XBP1	58
Cell Death and Survival	apoptosis	4.03E-07	AKAP12,AKR1B1,AKT1,ALDOA,ANXA1,ANXA2,APP,ATF4,ATF5,BAG1,BNIP2,CALR,CAPN2,CAPNS1,CCT2,Cdc42,CDK2AP1,CDK4,CLIC4,COPS5,COX5A,CRIP1,CSF1,CTBP1,CTGF,CTSB,CTTN,CYR61,DAD1,DCC,DDIT4,DECR1,EEF1A1,EEF1D,EHD1,EHMT2,EIF3C,EIF4EBP1,EIF4G1,ENO1,FAU,FGFR1,FSTL1,FTH1,GAPDH,GMFB,GNAI2,GNAS,GPI,GPX1,GPX4,GSN,HAX1,HDAC1,HMGA1,HSP90AA1,HSP90AB1,HSPA5,HSPB1,HSPE1,HTRA2,ILK,ITSN1,JUN,JUND,KLF6,Ldha/RGD1562690,LGALS1,…	128
Cell Death and Survival	cell death of tumor cell lines	1.18E-04	AKR1B1,AKT1,APP,ATF4,BAG1,CALR,CCND2,CCT2,COPS5,COX5A,CTSB,CTTN,CYR61,DCC,DDIT4,DNAJB1,EHMT2,EIF4EBP1,EIF5A,FAU,FGFR1,FTH1,GAPDH,GNAS,HAX1,HMGA1,HSP90AB1,HSPA5,HSPB1,HTRA2,JUN,KLF6,MAGED1,MDM2,NPM1,OAZ1,PRKAR1A,RAC1,RELA,RHOA,RIT1,RPS3,RPS6KB1,S100A11,SERPINE1,SMPD1,SOD1,SSRP1,THY1,TXN,VCP,YBX1	52
Cell Death and Survival	apoptosis of tumor cell lines	1.27E-04	AKR1B1,AKT1,APP,BAG1,CALR,CCT2,COPS5,COX5A,CTSB,CTTN,CYR61,DCC,DDIT4,EHMT2,EIF4EBP1,FAU,FGFR1,GAPDH,GNAS,HAX1,HMGA1,HSP90AB1,HSPA5,HSPB1,HTRA2,JUN,KLF6,MAGED1,MDM2,NPM1,PRKAR1A,RAC1,RHOA,RIT1,RPS3,RPS6KB1,S100A11,SERPINE1,SMPD1,SOD1,SSRP1,THY1,TXN,YBX1	44
Cell Death and Survival	apoptosis of fibroblast cell lines	1.33E-04	AKT1,APP,CAPNS1,CDK4,CLIC4,COPS5,COX5A,CYR61,DDIT4,EEF1A1,EIF3C,EIF4EBP1,FTH1,GPI,GSN,HSPA5,HTRA2,ILK,ITSN1,JUN,Ldha/RGD1562690,MDM2,MICAL1,P4HB,PDIA3,PTPN11,RAC1,RELA,RHOA,RHOC,RPL10,RPL37,SMPD1,SUMO1,SUN2,VIM,VPS28	37
Cell Death and Survival	cell death of breast cell lines	6.89E-03	CTGF,CYR61,DECR1,EIF4G1,FGFR1,JUN,NPM1,RELA,SERPINE1,TIMP1,TNK2,UBE2B	12
Cell Death and Survival	cell death of nervous tissue cell lines	1.37E-02	AKT1,APP,ARHGEF2,LMNA,PARK7,PSENEN,RELA,RHOA,SMPD1,SOD1	10
Cell Death and Survival	cell death of pheochromocytoma cell lines	1.49E-02	AKT1,APP,DDIT4,DNAJB1,GAPDH,HSPB1,JUN,MAGED1,NPM1,RAC1,RIT1,RPS3,SOD1,VCP	14
Cell Death and Survival	cell death of endocrine cell lines	2.01E-02	AKT1,CAPN2,CCND2,CTBP1,HMGA1,PRDX2,RAC1	7
Cell Death and Survival	apoptosis of pheochromocytoma cell lines	2.35E-02	AKT1,APP,DDIT4,HSPB1,JUN,MAGED1,NPM1,RAC1,RIT1,RPS3,SOD1	11
Cell Death and Survival	cell death of epithelial cell lines	2.68E-02	AKT1,APP,CLIC4,DCC,DECR1,EEF1A1,ELK1,EMP1,FGFR1,GAPDH,HAX1,HK1,HSPA5,HSPB1,HTRA2,JUN,RAC1,SERPINE1,SOD1,SSRP1,SYVN1,VDAC1,VOPP1,XBP1,YWHAQ,ZNF622	26
Cell Death and Survival	apoptosis of thymoma cell lines	3.80E-02	BAG1,DDIT4,FAU,TXN	4
Cell Death and Survival	apoptosis of endocrine cell lines	4.46E-02	AKT1,CAPN2,CTBP1,HMGA1,PRDX2,RAC1	6
Cell Death and Survival, DNA Replication, Recombination, and Repair	fragmentation of DNA	2.10E-02	APP,CAPN2,ENO1,GPX1,HSPB1,JUN,NPM1,PAM16,RELA,RHOA,SOD1,VPS28	12
Cell Morphology, Cellular Assembly and Organization	morphology of fibrils	1.47E-02	APP,COL3A1,COL5A1,PCOLCE,PPIB	5
Cell Morphology, Cellular Assembly and Organization	morphology of mitochondria	3.36E-02	ACOT13,AK1,AKT1,APP,FIS1,GAPDH,GPX4,HTRA2,RPS6KB1,SLC25A4,SOD1,VDAC3	12
Cell Morphology, Cellular Assembly and Organization	morphology of collagen fibrils	3.80E-02	COL3A1,COL5A1,PCOLCE,PPIB	4
Cell Morphology, Cellular Assembly and Organization, Cellular Development, Cellular Growth and Proliferation, Nervous System Development and Function, Tissue Development	outgrowth of neurites	6.43E-03	AKT1,BAG1,BTG3,Cdc42,CSNK1D,DCC,ELK1,EPN1,FGFR1,GNAS,JUN,LGALS1,PTPN11,RAC1,RHOA,TNFRSF12A,TXN,VAPA	18
Cell Morphology, Cellular Assembly and Organization, Cellular Function and Maintenance	reorganization of actin cytoskeleton	2.99E-04	AKAP12,ANXA1,AXL,Cdc42,CFL1,CTTN,DCC,FLNA,FLNC,ILK,MYH9,PTPN11,RAC1,RHOA,RPS6	15
Cell Morphology, Cellular Assembly and Organization, Cellular Function and Maintenance	reorganization of cytoskeleton	5.52E-04	AKAP12,ANXA1,AXL,Cdc42,CFL1,CTTN,DCC,FLNA,FLNC,ILK,MYH9,PLXNB2,PTPN11,RAC1,RHOA,RPS6	16
Cell Morphology, Cellular Assembly and Organization, Cellular Function and Maintenance	formation of invadopodia	2.71E-03	ARPC2,Cdc42,CTTN,MSN,RHOC	5
Cell Morphology, Cellular Function and Maintenance	transmembrane potential of mitochondria	4.16E-03	AKT1,APP,CLIC1,DNAJB1,GSN,ITSN1,PARK7,RAC1,RELA,SMPD1,SOD1,TIMP3,Ubb,VDAC1,VIM,XBP1	16
Cell Morphology, Connective Tissue Development and Function	shape change of fibroblast cell lines	1.78E-02	AKAP12,Cdc42,EHD1,FLNA,FLNC,PACSIN2,PLEKHG2,PTPN11,RAC1,RHOA,VIM	11
Cell Signaling	small GTPase mediated signal transduction	6.75E-03	ARHGDIA,ARHGEF2,BNIP2,Cdc42,CFL1,COL1A2,COL3A1,DAB2IP,DNM2,GDI2,ITSN1,JUN,MYO9B,PARK7,RAC1,RHOA,RIT1,TIMP2,TNFAIP1,TNK2,YWHAQ	21
Cell Signaling	protein kinase cascade	1.32E-02	ADAM9,AKT1,BNIP2,Cdc42,COPS5,CSNK2B,CTGF,DAB2IP,EEF1D,FGFR1,FKBP1A,FLNA,GADD45G,GNAI2,GPS1,GSTP1,HDAC1,HGS,HSPB1,ILK,LEMD2,LEPROT,LGALS1,LITAF,NENF,PAFAH1B1,PEBP1,RELA,RHOA,RHOC,SHISA5,TAOK1,TIMP2,TRAF7,UBE2I,UBE2V1,VAPA,ZNF622	38
Cell Signaling	I-kappaB kinase/NF-kappaB cascade	3.30E-02	CSNK2B,DAB2IP,EEF1D,FKBP1A,FLNA,GSTP1,HDAC1,HSPB1,LGALS1,LITAF,RELA,RHOA,RHOC,SHISA5,UBE2I,UBE2V1,VAPA	17
Cell Signaling	Rho protein signal transduction	3.96E-02	ARHGDIA,ARHGEF2,Cdc42,CFL1,COL1A2,COL3A1,MYO9B,RAC1,RHOA,TNFAIP1	10
Cell Signaling, Cellular Assembly and Organization, Post-Translational Modification, Protein Synthesis	nucleation of actin	2.71E-03	ACTR3,ARPC1B,ARPC3,ARPC5,GSN	5
Cell Signaling, Post-Translational Modification, Protein Synthesis	assembly of protein-protein complex	8.26E-03	ACTR3,ADD1,ARPC1B,ARPC3,ARPC5,CYBA,DAB2IP,EIF4EBP1,GSN,HMGA1,HSPA8,MDM2,NDUFS4,NDUFS7,PTPN11,SF3B3,STX4,SUMO1,TSPAN4,VCP	20
Cell-To-Cell Signaling and Interaction	fusion of cells	7.52E-03	AKT1,ANXA1,ANXA5,CAPN2,CLTC,CTSB,DNM2,FLNC,MYH9,RHOA,SOD1,UBE2B	12
Cell-To-Cell Signaling and Interaction, Cellular Assembly and Organization, Cellular Function and Maintenance	formation of focal adhesions	2.67E-02	Cdc42,CHCHD2,CIB1,CORO1C,CTTN,EHD1,PTPN11,RAC1,RHOA,RHOC,THY1,Tpm3	12
Cell-To-Cell Signaling and Interaction, Cellular Compromise	disassembly of focal adhesions	1.65E-02	AP2M1,DNM2,EHD1,TLN1	4
Cell-To-Cell Signaling and Interaction, Cellular Function and Maintenance, Inflammatory Response	phagocytosis of cells	4.80E-03	ANXA1,ANXA5,APP,AXL,CALR,CLIC4,CLTC,CNN2,CORO1C,CSF3R,CYBA,DNM2,EHD1,GSN,HSPA8,LMAN2,MFGE8,MYH9,NPM1,PSMD4,RAC1,VIM,XBP1	23
Cell-To-Cell Signaling and Interaction, Skeletal and Muscular System Development and Function	fusion of muscle cell lines	3.73E-02	ANXA1,ANXA5,CLTC,CTSB,FLNC	5
Cellular Assembly and Organization	organization of organelle	1.39E-03	AKAP2,AKT1,ALDOA,ANXA2,ARF1,ARHGEF2,BNIP2,Cdc42,CFL1,CHD3,CIB1,CLTC,COL1A1,COL1A2,COL3A1,COL5A1,CSNK1D,FAT1,FIS1,FKBP1A,GAPDH,GPX4,H3F3A/H3F3B,HMGN1,HTRA2,IFT27,ILK,LEMD2,LMAN1,LMNA,MIA3,MYH9,NSFL1C,PARK7,RAC1,RPS19,SEC61A1,SERPINH1,SPG7,SUN2,SURF4,TMED10,TMED2,TMED9,VIM,XBP1	46
Cellular Assembly and Organization	development of cytoplasm	1.14E-02	ACTR3,ADD1,ARHGEF2,ARPC2,CDK4,CHCHD2,CORO1C,CTGF,CTTN,FIS1,FLNA,GNAS,GSN,HAX1,HDAC1,HSPA8,KANK2,MIF,NPM1,PAK4,PARK7,PTPN11,RAC1,RHOA,RHOC,RPS28,RPS3,SMARCA4,THY1,TNFAIP1,Tpm3,ZYX	32
Cellular Assembly and Organization	quantity of filaments	1.47E-02	APP,COL5A1,FLNA,GNAS,PLEC,PTPN11,RAC1,RELA,SERPINH1,VIM	10
Cellular Assembly and Organization	quantity of focal complexes	2.68E-02	CTGF,CYR61	2
Cellular Assembly and Organization	quantity of membrane ruffles	2.68E-02	ADD1,ARHGEF2	2
Cellular Assembly and Organization	formation of cytoskeleton	2.72E-02	ACTR3,ADD1,ARHGEF2,ARPC2,CDK4,CHCHD2,CORO1C,CTGF,CTTN,FLNA,GSN,HAX1,KANK2,MIF,PAK4,PTPN11,RAC1,RHOA,RHOC,RPS3,SMARCA4,THY1,TNFAIP1,Tpm3,ZYX	25
Cellular Assembly and Organization, Cellular Development, Cellular Growth and Proliferation, Nervous System Development and Function, Tissue Development	growth of neurites	5.87E-03	AKT1,APP,BAG1,BTG3,Cdc42,CSNK1D,DCC,ELK1,EPN1,FGFR1,GNAS,JUN,LGALS1,PTPN11,RAC1,RHOA,TNFRSF12A,TXN,VAPA	19
Cellular Assembly and Organization, Cellular Function and Maintenance	organization of cytoplasm	2.40E-07	ACTG1,ACTN4,ACTR3,ADD1,AKAP12,AKAP2,AKT1,ALDOA,ANXA1,APP,ARF1,ARHGEF2,ARPC2,ARPC5,ATP6V1D,AXL,BNIP2,BTG3,CALR,CAPN2,Cdc42,CFL1,CHD3,CIB1,CLTC,CNN2,COMT,CORO1C,CSF1,CSNK1D,CSRP1,CTGF,CTNND1,CTSV,CTTN,CYR61,DCC,DCTN1,DCTN6,DNM2,DYNLT1,EEF1A1,EHD1,ELK1,FAT1,FGFR1,FIS1,FLNA,FLNC,GABARAP,GAPDH,GNAS,GPX4,GSN,HSP90AA1,HTRA2,ILK,JUN,LASP1,LMAN1,LRP1,LSP1,MSN,MYH9,NSFL1C,PAFAH1B1,PAK4,PARK7,PHLDB1,PLXNB2,…	100
Cellular Assembly and Organization, Cellular Function and Maintenance	organization of cytoskeleton	4.74E-07	ACTG1,ACTN4,ACTR3,ADD1,AKAP12,AKAP2,AKT1,ALDOA,ANXA1,APP,ARF1,ARHGEF2,ARPC2,ARPC5,ATP6V1D,AXL,BTG3,CALR,CAPN2,Cdc42,CFL1,CHD3,CIB1,CNN2,COMT,CORO1C,CSF1,CSNK1D,CSRP1,CTGF,CTNND1,CTSV,CTTN,CYR61,DCC,DCTN1,DCTN6,DNM2,DYNLT1,EEF1A1,EHD1,ELK1,FAT1,FGFR1,FLNA,FLNC,GABARAP,GAPDH,GNAS,GPX4,GSN,HSP90AA1,ILK,JUN,LASP1,LRP1,LSP1,MSN,MYH9,PAFAH1B1,PAK4,PHLDB1,PLXNB2,PTPN11,RAC1,RAN,RHOA,RHOC,RPS3,RPS6,SH3BG…	87
Cellular Assembly and Organization, Cellular Function and Maintenance	organization of actin cytoskeleton	4.13E-05	AKAP12,AKAP2,ALDOA,ANXA1,ARF1,ARHGEF2,ARPC5,AXL,CALR,Cdc42,CFL1,CORO1C,CSRP1,CTTN,DCC,FAT1,FLNA,FLNC,ILK,LRP1,MYH9,PAFAH1B1,PTPN11,RAC1,RAN,RHOA,RPS6,SH3BGRL3,SLC3A2,TLN1,TMSB10/TMSB4X,TNFAIP1,WDR1	33
Cellular Assembly and Organization, Cellular Function and Maintenance	organization of filaments	2.92E-03	AKAP2,ALDOA,ANXA2,ARF1,ARHGEF2,Cdc42,CFL1,CIB1,COL1A1,COL1A2,COL3A1,COL5A1,FAT1,FKBP1A,GAPDH,ILK,MIA3,RAC1,SERPINH1,VIM	20
Cellular Assembly and Organization, Cellular Function and Maintenance	organization of fibrils	4.40E-03	ANXA2,COL1A1,COL1A2,COL3A1,COL5A1,FKBP1A,ILK,MIA3,SERPINH1	9
Cellular Assembly and Organization, Cellular Function and Maintenance	microtubule dynamics	6.16E-03	ACTG1,ACTN4,ACTR3,APP,ARHGEF2,ARPC2,ATP6V1D,AXL,BTG3,Cdc42,CIB1,COMT,CSF1,CSNK1D,CSRP1,CTGF,CTNND1,CTSV,CTTN,CYR61,DCC,DCTN1,DNM2,EEF1A1,EHD1,ELK1,FGFR1,FLNA,GABARAP,GAPDH,GNAS,GPX4,GSN,HSP90AA1,ILK,JUN,LASP1,LRP1,MSN,PAFAH1B1,PHLDB1,RAC1,RAN,RHOA,RHOC,RPS3,SOD1,SSRP1,SUMO1,TIMP3,TNFRSF12A,UBE2I,VIM	53
Cellular Assembly and Organization, Cellular Function and Maintenance	organization of Golgi apparatus	2.18E-02	Cdc42,CLTC,CSNK1D,LMAN1,NSFL1C,SURF4,TMED10,TMED2,TMED9	9
Cellular Assembly and Organization, Cellular Function and Maintenance	organization of collagen fibrils	2.24E-02	ANXA2,COL1A1,COL1A2,COL3A1,COL5A1,MIA3,SERPINH1	7
Cellular Assembly and Organization, Cellular Function and Maintenance, Tissue Development	formation of actin filaments	2.34E-02	ACTR3,ADD1,ARHGEF2,ARPC2,CDK4,CHCHD2,CTGF,CTTN,GSN,HAX1,KANK2,MIF,PAK4,PTPN11,RAC1,RHOA,RHOC,SMARCA4,THY1,TNFAIP1,Tpm3,ZYX	22
Cellular Assembly and Organization, Cellular Function and Maintenance, Tissue Development	formation of actin stress fibers	2.82E-02	ARHGEF2,CDK4,CHCHD2,CTGF,HAX1,KANK2,MIF,PAK4,PTPN11,RAC1,RHOA,RHOC,SMARCA4,THY1,TNFAIP1,Tpm3,ZYX	17
Cellular Compromise	breakage of actin filaments	3.16E-02	FLNA,GSN,INF2	3
Cellular Compromise, Cellular Function and Maintenance	endoplasmic reticulum stress response	1.70E-03	CALR,COL3A1,DERL2,DNAJA1,DNAJB1,HSP90AA1,HSP90AB1,HSPA5,HSPE1,MIA3,SERPINH1,SYVN1,VCP,XBP1	14
Cellular Development, Cellular Growth and Proliferation	cell proliferation of sarcoma cell lines	2.85E-02	COL1A1,CTGF,HMGA1,ILK,MDM2,NACA,RAC1,RELA,SERPINE1,TIMP3	10
Cellular Development, Cellular Growth and Proliferation	cell proliferation of tumor cell lines	3.28E-02	ACTN4,AKT1,ALDOA,ANXA1,ARHGEF2,AXL,CDK2AP1,CDK4,COL1A1,COPS5,CTGF,CTTN,CYR61,EHMT2,EMP1,FBLN2,FGFR1,GNAS,HMGA1,HSPA5,HSPB1,ILK,KLF6,Ldha/RGD1562690,LRP1,MDM2,MYBBP1A,NACA,PBLD,PEBP1,PTPN11,RAC1,RELA,RPS14,RPS6KB1,SERPINE1,SLC3A2,SMARCA4,SMO,SP110,TIMP3	41
Cellular Development, Cellular Growth and Proliferation, Connective Tissue Development and Function	proliferation of fibroblast cell lines	1.92E-02	AKAP12,AKR1B1,AKT1,ALDOA,BTG3,CDK4,CLTC,COL1A1,COPS5,CSF1,CSNK2B,EEF1D,EIF3C,GNAI2,HMGA1,ITSN1,JUN,JUND,KLF6,Ldha/RGD1562690,MDM2,MIF,NPM1,PAK4,PSMC2,PTPN11,RAC1,RELA,RHOA,RIT1,RNF187,RPS6,S100A6,SERPINE1,SLC3A2,SSB,UBTF	37
Cellular Development, Cellular Growth and Proliferation, Connective Tissue Development and Function, Embryonic Development, Organ Development, Organismal Development, Skeletal and Muscular System Development and Function, Tissue Development	formation of myofibroblasts	2.68E-02	RAC1,SERPINE1	2
Cellular Development, Cellular Growth and Proliferation, Connective Tissue Development and Function, Organ Development, Skeletal and Muscular System Development and Function, Tissue Development	proliferation of myofibroblasts	1.47E-02	AKT1,CTSB,SMPD1	3
Cellular Development, Cellular Growth and Proliferation, Hair and Skin Development and Function	proliferation of epithelial cell lines	2.77E-02	AKT1,ALDOA,CDK2AP1,CYR61,DECR1,EIF4EBP1,FBLN2,FGFR1,GNAI2,HSP90AA1,HSP90AB1,JUN,LARP1,MAGED1,MFGE8,PTP4A1,RAC1,RHOA,SDHB,SUMO1,VDAC1,XBP1	22
Cellular Development, Reproductive System Development and Function	epithelial-mesenchymal transition of breast cell lines	3.62E-02	AKT1,CSNK2B,FGFR1,GPI,HNRNPM,ILK,PCBP1,RAC1	8
Cellular Function and Maintenance	engulfment of cells	2.72E-06	ACTN4,ADD1,ANXA1,ANXA5,AP2M1,APP,ARF1,ATP6V0C,ATP6V0E1,ATP6V1D,ATP6V1F,AXL,CALR,CD63,CLIC4,CLTC,CNN2,CORO1C,CSF3R,CTNND1,CYBA,DNM2,EHD1,GSN,HAX1,HSP90AA1,HSPA5,HSPA8,ILK,ITSN1,LMAN2,LRP1,MFGE8,MYH9,NPM1,PSMD4,RAC1,RHOA,SF3B3,VIM,XBP1	41
Cellular Function and Maintenance	endocytosis	3.90E-06	ACTN4,ADD1,ANXA5,AP1S1,AP2M1,APP,ARF1,ATP5B,ATP6V0C,ATP6V0E1,ATP6V1D,ATP6V1F,AXL,CANX,CD63,Cdc42,CLTC,CTNND1,CTTN,DNM2,EHD1,EPN1,HAX1,HGS,HSP90AA1,HSPA5,ITSN1,LRP1,PACSIN2,RAB34,RAC1,RHOA,SERPINE1,SF3B3,Siglech,SNX17	36
Cellular Function and Maintenance	receptor-mediated endocytosis	2.69E-05	AP1S1,AP2M1,APP,ATP5B,ATP6V0C,ATP6V0E1,ATP6V1D,ATP6V1F,CANX,CLTC,CTTN,DNM2,HAX1,HGS,ITSN1,LRP1,PACSIN2,RAC1,SERPINE1,SF3B3,Siglech,SNX17	22
Cellular Function and Maintenance	internalization by tumor cell lines	9.78E-05	AP2M1,ATP6V0C,ATP6V0E1,ATP6V1D,ATP6V1F,AXL,CLTC,DNM2,HAX1,HSP90AA1,ILK,LRP1,PSMD4,SF3B3,VIM	15
Cellular Function and Maintenance	engulfment of tumor cell lines	2.71E-04	AP2M1,ATP6V0C,ATP6V0E1,ATP6V1D,ATP6V1F,AXL,CLTC,DNM2,HAX1,HSP90AA1,LMAN2,PSMD4,RAC1,SF3B3,VIM	15
Cellular Function and Maintenance	endocytosis by tumor cell lines	9.13E-04	AP2M1,ATP6V0C,ATP6V0E1,ATP6V1D,ATP6V1F,AXL,CLTC,DNM2,HAX1,HSP90AA1,SF3B3	11
Cellular Function and Maintenance	Clathrin mediated endocytosis	4.01E-03	AP2M1,ATP6V0C,ATP6V0E1,ATP6V1D,ATP6V1F,CANX,CLTC,DNM2,HAX1,SF3B3	10
Cellular Function and Maintenance	engulfment by cervical cancer cell lines	5.74E-03	AP2M1,ATP6V0C,ATP6V0E1,ATP6V1D,ATP6V1F,CLTC,DNM2,HAX1,SF3B3	9
Cellular Function and Maintenance, Embryonic Development	cell saturation density of embryonic cell lines	2.68E-02	AKAP12,JUN	2
Cellular Function and Maintenance, Inflammatory Response	phagocytosis	5.44E-03	ANXA1,ANXA5,APP,AXL,CALR,CLIC4,CLTC,CNN2,CORO1C,CSF3R,CYBA,DNM2,EHD1,GSN,HSPA8,LMAN2,MFGE8,MSN,MYH9,NPM1,PSMD4,RAC1,VIM,XBP1	24
Cellular Growth and Proliferation	proliferation of cells	9.08E-05	ACLY,ACTN4,AEBP1,AKAP12,AKR1B1,AKT1,ALDOA,ANXA1,ANXA2,APP,ARF1,ARHGEF2,ARHGEF25,AXL,BAG1,BTG3,CALR,CAPN2,CAPNS1,CCND2,CCT2,CDC16,Cdc42,CDK2AP1,CDK4,CLTC,COL1A1,COMT,COPS5,CSF1,CSF3R,CSNK1D,CSNK2B,CTBP1,CTGF,CTSB,CTSV,CTTN,CYBA,CYR61,DCC,DECR1,DNM2,EEF1D,EHMT2,EIF3C,EIF4EBP1,ELK1,EMP1,EPN1,FBLN2,FGFR1,FIS1,FKBP1A,GNAI2,GNAS,GPI,GPX1,GSN,HDAC1,HMGA1,HPRT1,HSP90AA1,HSP90AB1,HSPA5,HSPB1,IDH2,ILK,IMPD…	142
Cellular Growth and Proliferation	colony formation of cells	1.34E-02	AKAP12,CLTC,CSF1,CYR61,EIF4EBP1,GADD45G,GNAI2,HMGA1,ILK,ITSN1,JUN,KLF6,LOXL1,MDM2,NPM1,RAC1,RELA,RHOC,RIT1,RPS19,RPS6KB1,SLC3A2,SOD1	23
Cellular Growth and Proliferation	colony formation	1.36E-02	AKAP12,AXL,CLTC,CSF1,CYR61,EIF4EBP1,GADD45G,GNAI2,HMGA1,ILK,ITSN1,JUN,KLF6,LOXL1,LRP1,MDM2,NPM1,RAC1,RELA,RHOC,RIT1,RPS19,RPS6KB1,SERPINE1,SLC3A2,SOD1,XBP1	27
Cellular Growth and Proliferation	colony formation of lung cancer cell lines	1.80E-02	CYR61,GADD45G,ILK,KLF6,MDM2,SOD1	6
Cellular Movement	cell movement of tumor cell lines	3.46E-04	ACTN4,ADAM9,AKT1,AP2M1,APP,ARPC2,AXL,BAG1,CAPNS1,CTBP1,CTGF,CTSB,CTTN,CYR61,FBLN2,FLNA,FLNC,GPI,HAX1,HDAC1,HSP90AA1,ILK,JUN,KLF6,LGALS1,LRP1,MTCH2,NISCH,RAC1,RHOA,SERPINE1,TIMP2,TIMP3,YBX1,ZYX	35
Cellular Movement	invasion of cells	4.53E-04	ACTA2,ADAM15,ADAM9,AKT1,ANXA2,APP,ARHGDIA,AXL,CAPN2,CAPNS1,Cdc42,COPB2,CSF1,CTBP1,CTGF,CTNND1,CTSB,CTSV,CTTN,CYR61,ELK1,FBLN2,FGFR1,FSTL1,GPI,GSN,HAX1,HNRNPA2B1,HSP90AB1,ILK,JUN,KLF6,LASP1,LGALS1,LRP1,MDM2,MFGE8,NPM1,PTP4A2,RAC1,RELA,RHOA,RHOC,SERPINE1,SLC12A4,SMO,SMPD1,STX4,TAGLN,TIMP3,TNK2,VIM,YWHAQ	53
Cellular Movement	invasion of tumor cell lines	1.31E-03	ACTA2,ADAM15,ADAM9,AKT1,APP,ARHGDIA,AXL,CAPN2,CAPNS1,COPB2,CTBP1,CTGF,CTNND1,CTSB,CTTN,CYR61,ELK1,FBLN2,FGFR1,GPI,HAX1,HNRNPA2B1,ILK,JUN,KLF6,LGALS1,LRP1,MDM2,PTP4A2,RAC1,RELA,RHOA,RHOC,SLC12A4,SMO,SMPD1,STX4,TAGLN,TIMP3,TNK2,VIM,YWHAQ	42
Cellular Movement	migration of tumor cell lines	1.39E-03	AKT1,AP2M1,APP,ARPC2,AXL,BAG1,CAPNS1,CTBP1,CTGF,CTSB,CTTN,CYR61,FBLN2,FLNA,FLNC,HAX1,HDAC1,HSP90AA1,ILK,JUN,KLF6,LGALS1,LRP1,NISCH,RAC1,RHOA,SERPINE1,TIMP2,TIMP3,ZYX	30
Cellular Movement	cell movement of fibrosarcoma cell lines	2.16E-03	AP2M1,APP,ARPC2,CTTN,FLNA,FLNC,GPI,SERPINE1,TIMP2	9
Cellular Movement	invasion of carcinoma cell lines	2.97E-03	ACTA2,AXL,CAPNS1,COPB2,CTBP1,CTGF,CTNND1,CTSB,CTTN,CYR61,FBLN2,FGFR1,HAX1,LGALS1,LRP1,PTP4A2,SMO,TIMP3,VIM	19
Cellular Movement	cell movement	5.87E-03	2210013O21Rik,ACO2,ACTB,ACTN4,ACTR3,ADAM15,ADAM9,ADD1,AKT1,ALDOA,ANXA1,AP2M1,APP,ARPC2,AXL,B4GALT1,BAG1,CAPNS1,Cdc42,CDK4,CHD4,CIB1,CLIC4,COL1A1,CSF1,CSNK2B,CTBP1,CTGF,CTSB,CTSV,CTTN,CXCL11,CYR61,DNAJA1,EHD1,EIF4EBP1,ENO1,FBLN2,FGFR1,FLNA,FLNC,GAPDH,GNAI2,GPI,GSN,HAX1,HDAC1,HSP90AA1,HSPA5,ILK,JUN,KLF6,LGALS1,LRP1,LSP1,MIF,MTCH2,MYH9,MYO9B,NACA,NFIC,NISCH,NPM1,P4HB,PAFAH1B1,PAK4,PDIA3,PLEC,PTP4A1,…	91
Cellular Movement	migration of fibrosarcoma cell lines	5.92E-03	AP2M1,APP,ARPC2,CTTN,FLNA,FLNC,SERPINE1,TIMP2	8
Cellular Movement	cell movement of carcinoma cell lines	1.12E-02	AKT1,AXL,CAPNS1,CTSB,CTTN,CYR61,FBLN2,HAX1,JUN,LGALS1,LRP1,MTCH2,RAC1,ZYX	14
Cellular Movement	migration of carcinoma cell lines	1.83E-02	AKT1,AXL,CAPNS1,CTSB,CTTN,CYR61,FBLN2,HAX1,JUN,LGALS1,LRP1,ZYX	12
Cellular Movement	invasion of thyroid tumor cell lines	2.18E-02	FGFR1,LRP1,TIMP3,VIM	4
Cellular Movement	migration of connective tissue cells	4.11E-02	AKT1,CTGF,EHD1,LGALS1,MIF,PLEC,ZYX	7
Cellular Movement	cell movement of dermal cells	4.29E-02	ACTN4,ADAM9,AKT1,GSN,ILK,PAK4,PLEC,RAC1,SERPINE1,TIMP1	10
Developmental Disorder, Hereditary Disorder, Organismal Injury and Abnormalities, Skeletal and Muscular Disorders	Duchenne muscular dystrophy	2.47E-02	ACLY,BMP1,CFL1,CNN3,COL1A1,COL1A2,COL3A1,COL5A1,LOXL1,S100A11,SERPINH1,TIMP3,TUBB2A	13
DNA Replication, Recombination, and Repair	repair of DNA	1.88E-02	APP,CDK2AP1,CIB1,COPS5,CSNK1D,DDB1,EIF4G1,GSTP1,HMGA1,HMGN1,MDM2,NPM1,PDIA3,RAC1,RPS27L,RPS3,SHFM1,SUMO1,TNFAIP1,UBE2B,UBE2I,UBE2V1,VCP	23
DNA Replication, Recombination, and Repair	degradation of DNA	2.35E-02	APP,CAPN2,ENO1,GPX1,HSPB1,JUN,NPM1,PAM16,PPIB,RELA,RHOA,SOD1,VPS28	13
Energy Production, Nucleic Acid Metabolism, Small Molecule Biochemistry	metabolism of ATP	2.56E-07	ATP5A1,ATP5B,ATP5C1,ATP5D,Atp5e,ATP5G1,ATP5H,ATP5J,ATP5J2,Atp5k,ATP5L,HSPA8,VCP	13
Free Radical Scavenging	metabolism of reactive oxygen species	1.47E-02	ACTB,AKR1B1,AKT1,APP,CTTN,CYBA,DBI,DDIT4,DECR1,FTH1,GPX1,GPX4,HK1,ITSN1,JUND,OGDH,PARK7,PRDX2,PRDX5,PXDN,RAC1,SMPD1,SOD1,TXN,TXN2,XBP1	26
Free Radical Scavenging	production of reactive oxygen species	2.82E-02	ACTB,AKR1B1,AKT1,APP,CTTN,CYBA,DBI,DECR1,FTH1,HK1,JUND,PARK7,PRDX2,RAC1,SMPD1,SOD1,TXN2,XBP1	18
Free Radical Scavenging, Molecular Transport	quantity of hydrogen peroxide	3.80E-02	PRDX2,PRDX5,SOD1,TXN2	4
Free Radical Scavenging, Small Molecule Biochemistry	catabolism of hydrogen peroxide	3.14E-04	APP,GPX1,GPX4,PRDX2,PRDX5,PXDN,TXN	7
Free Radical Scavenging, Small Molecule Biochemistry	reduction of hydrogen peroxide	2.41E-02	APP,PRDX2,TXN	3
Free Radical Scavenging, Small Molecule Biochemistry	metabolism of hydrogen peroxide	2.68E-02	APP,CYBA,GPX1,GPX4,PARK7,PRDX2,PRDX5,PXDN,SOD1,TXN	10
Gene Expression	initiation of expression of RNA	4.63E-04	COPS5,EIF2B2,EIF3C,EIF3D,EIF3G,EIF3K,EIF4EBP1,EIF4G1,EIF4H,GTF2I,HSPB1,LARP1,MTIF2,SSRP1	14
Gene Expression	expression of mRNA	5.17E-04	COPS5,EEF1D,EIF2B2,EIF3C,EIF3D,EIF3G,EIF3K,EIF4EBP1,EIF4G1,EIF4H,HSPB1,LARP1,MTIF2	13
Gene Expression	expression of RNA	7.03E-03	AEBP1,AES,AKT1,APP,ARF4,ARHGEF2,ATF4,ATF5,BAG1,BPTF,BRD2,BTF3,BTG3,C14orf166,CALR,Cdc42,CHCHD2,CHD3,CHD4,CNN2,COL1A1,COPS5,CREB5,CSF1,CTBP1,CTGF,CYR61,DAB2IP,DNAJB1,DRAP1,EDF1,EEF1D,EHMT2,EIF2B2,EIF3C,EIF3D,EIF3G,EIF3K,EIF4EBP1,EIF4G1,EIF4H,ELK1,ENO1,ERP29,FGFR1,GADD45G,GNAS,GPX1,GSN,GSTP1,GTF2F1,GTF2I,HAX1,HDAC1,HGS,HMGA1,HMGN1,HNRNPA2B1,HP1BP3,HSPA8,HSPB1,ILK,JUN,JUND,KANK2,KLF6,LARP1,LGALS1,LI…	142
Gene Expression, Protein Synthesis	initiation of translation of mRNA	3.63E-05	COPS5,EIF2B2,EIF3C,EIF3D,EIF3G,EIF3K,EIF4EBP1,EIF4G1,EIF4H,HSPB1,LARP1,MTIF2	12
Metabolic Disease	systemic amyloidosis	2.60E-02	GSN,PSMB5,PSMD1,PSMD2	4
Molecular Transport, Protein Trafficking	transport of protein	3.40E-07	AKT1,AP2M1,ARF1,CALR,CFL1,COL1A1,CTTN,DNAJA1,DNM2,DYNLT1,EHD1,EIF5A,ERP29,GABARAP,GDI2,HGS,HSPA8,IFT27,JUN,LRP1,MIA3,MYH9,NAPA,NME2,NPM1,NUTF2,PDIA3,PTPN11,RAN,SCAMP3,SEC61B,SELK,SMO,SYNRG,TIMM23,TMED10,TMED2,VAPA,YWHAH	39
Molecular Transport, Protein Trafficking	export of protein	3.93E-02	CALR,EIF5A,NME2,NUTF2,PTPN11,RAN	6
Nucleic Acid Metabolism	metabolism of nucleic acid component or derivative	6.43E-03	ACLY,AK1,AKAP12,ALDOA,APRT,ATP5A1,ATP5B,ATP5C1,ATP5D,Atp5e,ATP5G1,ATP5H,ATP5J,ATP5J2,Atp5k,ATP5L,COMT,CS,CTPS1,DBI,ERH,FDPS,GNAI2,GNAS,HPRT1,HSPA8,IDH3G,IMPDH2,MDH2,NME2,NT5C,OGDH,PDE4C,PGK1,PRPSAP1,SMPD1,SOD1,TIMP2,VCP,VDAC1	40
Nucleic Acid Metabolism, Small Molecule Biochemistry	metabolism of nucleoside triphosphate	1.77E-06	AK1,ALDOA,ATP5A1,ATP5B,ATP5C1,ATP5D,Atp5e,ATP5G1,ATP5H,ATP5J,ATP5J2,Atp5k,ATP5L,CTPS1,HSPA8,NME2,SOD1,VCP,VDAC1	19
Nucleic Acid Metabolism, Small Molecule Biochemistry	metabolism of purine nucleotide	1.01E-04	ATP5A1,ATP5B,ATP5C1,ATP5D,Atp5e,ATP5G1,ATP5H,ATP5J,ATP5J2,Atp5k,ATP5L,HSPA8,IDH3G,MDH2,OGDH,VCP	16
Nucleic Acid Metabolism, Small Molecule Biochemistry	biosynthesis of nucleoside triphosphate	1.02E-02	AK1,ALDOA,ATP5B,ATP5D,ATP5G1,CTPS1,NME2,SOD1,VDAC1	9
Nucleic Acid Metabolism, Small Molecule Biochemistry	metabolism of nucleotide	1.12E-02	AK1,AKAP12,ALDOA,ATP5A1,ATP5B,ATP5C1,ATP5D,Atp5e,ATP5G1,ATP5H,ATP5J,ATP5J2,Atp5k,ATP5L,CTPS1,FDPS,GNAI2,GNAS,HPRT1,HSPA8,IDH3G,IMPDH2,MDH2,NME2,NT5C,OGDH,PDE4C,PRPSAP1,SMPD1,SOD1,TIMP2,VCP,VDAC1	33
Nucleic Acid Metabolism, Small Molecule Biochemistry	metabolism of NADH	2.18E-02	IDH3G,MDH2,OGDH,VCP	4
Nucleic Acid Metabolism, Small Molecule Biochemistry	salvage of adenine	2.68E-02	APRT,HPRT1	2
Organ Morphology, Renal and Urological System Development and Function	dilation of renal tubule	2.60E-02	APRT,ARHGDIA,JUND,PRKCSH	4
Organismal Development	growth of organism	2.60E-02	ADD1,AES,AKT1,ATF5,ATOX1,CCM2,Cdc42,CDK4,CLIC4,COPS5,CSF1,CSNK2B,DCTN1,EHMT2,EIF4EBP1,EPN1,GNAS,GSN,H3F3A/H3F3B,HSP90AA1,HSP90AB1,HSP90B1,HSPA5,IDH3G,JUND,KARS,LMNA,LRRC8A,MFGE8,MGAT1,PPP1CA,PSMC3,PTP4A2,PTPN11,RAC1,Rpl29 (includes others),RPS6KB1,SDHD,SELM,SLC25A4,SMARCA4,SMO,SUMO2,TKT,TLN1,TMED2,TXN,UBE2I,UBTF	49
Organismal Development	growth of multicellular organism	2.60E-02	ADD1,ATF5,CCM2,Cdc42,CLIC4,GNAS,H3F3A/H3F3B,PTPN11,Rpl29 (includes others),SELM,SMO,TMED2	12
Organismal Development	arrest in growth of organism	4.16E-02	COPS5,CSNK2B,DCTN1,EHMT2,EPN1,HSP90B1,MGAT1,PSMC3,PTPN11,RAC1,SDHD,SMARCA4,SUMO2,TLN1,TXN,UBTF	16
Organismal Functions, Organismal Injury and Abnormalities, Tissue Morphology	healing of wound	2.21E-02	ADAM9,AEBP1,B4GALT1,C6orf89,CLIC4,CNN2,COL1A1,COL3A1,COL5A1,FGFR1,GSN,HSPB1,ILK,MIA3,PLEC,PRKAR1A,SERPINE1	17
Organismal Injury and Abnormalities	Wound	2.23E-02	ACTA2,ADAM9,AEBP1,B4GALT1,C6orf89,CLIC4,CNN2,COL1A1,COL3A1,COL5A1,CSF1,FGFR1,GSN,HSPB1,ILK,MIA3,NFIC,PLEC,PRKAR1A,SERPINE1	20
Organismal Survival	organismal death	2.66E-04	ACADVL,ACLY,ACTA2,ACTB,ACTG1,ACTN4,ADAM15,ADAM9,ADD1,AEBP1,AES,AKAP12,AKT1,Anp32b,ANXA1,AP2M1,APP,APRT,ARF1,ARHGDIA,ATF4,ATOX1,ATP6V0C,B4GALT1,BAG1,BMP1,BPTF,CALR,CANX,CAPN2,CAPNS1,CCM2,CCND2,Cdc42,CDK2AP1,CDK4,CFL1,CLIC4,COL1A1,COL3A1,COL5A1,COPS5,CSF1,CSNK1D,CSNK2B,CTBP1,CTGF,CTNND1,CTSB,CTSV,CTTN,CYR61,DAD1,DBI,DCC,DCTN1,DDB1,DERL2,DNAJB1,DNAJC5,DNM2,DRAP1,DYNC1H1,EHD1,EHMT2,EIF3D,EIF3M,ELOVL1…	184
Organismal Survival	morbidity or mortality	3.81E-04	ACADVL,ACLY,ACTA2,ACTB,ACTG1,ACTN4,ADAM15,ADAM9,ADD1,AEBP1,AES,AKAP12,AKT1,Anp32b,ANXA1,AP2M1,APP,APRT,ARF1,ARHGDIA,ATF4,ATOX1,ATP6V0C,B4GALT1,BAG1,BMP1,BPTF,CALR,CANX,CAPN2,CAPNS1,CCM2,CCND2,Cdc42,CDK2AP1,CDK4,CFL1,CLIC4,COL1A1,COL3A1,COL5A1,COPS5,CSF1,CSNK1D,CSNK2B,CTBP1,CTGF,CTNND1,CTSB,CTSV,CTTN,CYR61,DAD1,DBI,DCC,DCTN1,DDB1,DERL2,DNAJB1,DNAJC5,DNM2,DRAP1,DYNC1H1,EHD1,EHMT2,EIF3D,EIF3M,ELOVL1…	185
Post-Translational Modification	ubiquitination	2.72E-03	AIMP2,AKT1,BTF3,CDC34,DDB1,DNAJA1,FKBP1A,HPRT1,HSP90AA1,HSP90AB1,HSPA5,JKAMP,KLHL22,MDM2,Nedd4,NPM1,PARK7,PCBP2,Rbx1,RNF187,RPS3,SYVN1,TCEB1,TNFAIP1,TRAF7,TRPC4AP,UBE2B,UBE2I,UBE2V1,UBXN1,VCP,VPS28	32
Post-Translational Modification	ubiquitination of protein	1.47E-02	AIMP2,AKT1,BTF3,CDC34,DDB1,DNAJA1,FKBP1A,HSP90AA1,HSP90AB1,HSPA5,KLHL22,MDM2,Nedd4,NPM1,PARK7,Rbx1,RNF187,RPS3,SYVN1,TCEB1,TNFAIP1,TRAF7,TRPC4AP,UBE2B,UBE2I,UBE2V1,UBXN1,VCP,VPS28	29
Post-Translational Modification	N-glycosylation of protein	2.38E-02	B4GALT1,DDOST,RPN1,RPN2,SYVN1,VCP	6
Post-Translational Modification, Protein Degradation	oxidation of protein	3.80E-02	DNAJB1,PARK7,RAC1,RHOA	4
Post-Translational Modification, Protein Degradation, Protein Synthesis	hydrolysis of protein fragment	1.79E-02	ADAM9,AKT1,AURKAIP1,BMP1,CAPN2,CAPNS1,CSTB,CTSB,CTSV,CTSZ,HSPA8,HTRA2,MYH9,PCOLCE,PDIA3,PSENEN,PSMB5,SERPINE1,SPCS1,TIMP2,TIMP3,XPNPEP1	22
Post-Translational Modification, Protein Folding	folding of protein	7.59E-04	CALR,DNAJA1,ERP29,FKBP1A,HSP90AA1,HSP90AB1,HSPA8,HSPE1,LMAN1,PDIA6,SNRNP70,TBCA,UGGT1	13
Post-Translational Modification, Protein Folding	refolding of protein	1.81E-02	DNAJA1,FKBP1A,HSP90AA1,HSPA8,SNRNP70	5
Protein Degradation, Protein Synthesis	catabolism of protein	9.54E-07	ADAM15,ADAM9,AKT1,AURKAIP1,BMP1,CALR,CAPN2,CAPNS1,CCT2,CCT5,Cdc42,CSTB,CTSB,CTSV,CTSZ,DAB2IP,DERL2,EGLN2,FLNA,GAPDH,GOLGA7,HGS,HSPA8,HTRA2,LAMP1,MDM2,MYH9,NDUFA13,Nedd4,NPM1,OAZ1,PARK7,PCOLCE,PDIA3,PPIB,PSENEN,PSMB5,PSMC2,Rbx1,RELA,RNF6,SEC22B,SERPINE1,SF3B3,SMO,SOD1,SPCS1,STX5,SUMO1,SYVN1,TIMP2,TIMP3,TRPC4AP,UBC,UBE2B,UBE2I,USP14,VCP,VPS28,XBP1,XPNPEP1	61
Protein Degradation, Protein Synthesis	stabilization of protein	1.92E-02	CALR,CCT2,CCT5,Cdc42,FLNA,GAPDH,GOLGA7,HSPA8,LAMP1,NPM1,PARK7,PPIB,SMO,SUMO1,SYVN1,UBE2B,XBP1	17
Protein Synthesis	metabolism of protein	4.57E-11	ADAM15,ADAM9,AKT1,ANXA1,APP,ATF4,AURKAIP1,BMP1,CALR,CAPN2,CAPNS1,CCT2,CCT5,Cdc42,CDK4,COPS5,CSTB,CTSB,CTSV,CTSZ,DAB2IP,DERL2,EEF1A1,EEF2,EGLN2,EIF2B2,EIF3C,EIF3D,EIF3G,EIF3K,EIF4EBP1,EIF4G1,EIF4H,FKBP1A,FLNA,Fus,GAPDH,GOLGA7,GSN,HGS,HSPA8,HSPB1,HTRA2,JUN,LAMP1,LARP1,MDM2,MTIF2,MYH9,NDUFA13,Nedd4,NPM1,OAZ1,PABPC1,PARK7,PCOLCE,PDIA3,POLDIP3,PPIB,PSENEN,PSMB5,PSMC2,RBM3,Rbx1,RELA,RNF6,RPLP1,RPS27L,R…	94
Protein Synthesis	synthesis of protein	3.90E-06	AKT1,ANXA1,APP,ATF4,CDK4,COPS5,EEF1A1,EEF2,EIF2B2,EIF3C,EIF3D,EIF3G,EIF3K,EIF4EBP1,EIF4G1,EIF4H,FKBP1A,Fus,GSN,HSPB1,JUN,LARP1,MTIF2,NPM1,PABPC1,POLDIP3,RBM3,RPLP1,RPS27L,Rps3a1,RPS6,RPS6KB1,SERINC1,SOD1,SSB,THY1	36
Protein Synthesis	initiation of translation of protein	5.49E-05	COPS5,EIF2B2,EIF3C,EIF3D,EIF3G,EIF3K,EIF4EBP1,EIF4G1,EIF4H,HSPB1,LARP1,MTIF2	12
Protein Synthesis	translation of protein	1.01E-04	APP,COPS5,EIF2B2,EIF3C,EIF3D,EIF3G,EIF3K,EIF4EBP1,EIF4G1,EIF4H,Fus,HSPB1,LARP1,MTIF2,RPS6KB1,SSB	16
Protein Synthesis	translation	2.99E-04	APP,COPS5,EEF1A1,EEF2,EIF2B2,EIF3C,EIF3D,EIF3G,EIF3K,EIF4EBP1,EIF4G1,EIF4H,Fus,HSPB1,LARP1,MTIF2,RPS6KB1,SSB	18
Protein Synthesis	expression of protein	1.64E-03	ANXA1,APP,COPS5,EIF2B2,EIF3C,EIF3D,EIF3G,EIF3K,EIF4EBP1,EIF4G1,EIF4H,Fus,HSPB1,LARP1,MTIF2,RPS6KB1,SOD1,SSB,THY1	19
Protein Trafficking	targeting of protein	2.11E-03	CALR,EIF5A,FIS1,GABARAP,HGS,HSPA8,NUTF2,PTPN11,RAN,RPL11,SEC61A1,SYNGR2,TIMM13,TIMM17A,TIMM23,YWHAE,YWHAQ	17
RNA Post-Transcriptional Modification	processing of rRNA	3.71E-08	IMP3,NPM1,RPL11,RPL14,RPL26,RPL5,RPL7,RPS15,RPS16,RPS19,RPS24,RPS28,RPS6,RPS7	14
RNA Post-Transcriptional Modification	processing of RNA	6.43E-08	AHNAK,APP,HNRNPA2B1,HNRNPC,HNRNPF,Hnrnph1,HNRNPM,IMP3,JUN,LSM4,NONO,NPM1,PABPC1,PABPN1,PCBP1,PRPF8,RBM3,RPL11,RPL14,RPL26,RPL5,RPL7,RPS15,RPS16,RPS19,RPS24,RPS28,RPS6,RPS7,SARS,SF3B3,SNRNP70,SNRPD1,Srrm1,SSB,SSU72,SUPT5H,TRA2A,TXNL4A	39
RNA Post-Transcriptional Modification	processing of mRNA	7.52E-03	APP,HNRNPA2B1,HNRNPC,HNRNPM,NONO,NPM1,PABPC1,PABPN1,PCBP1,PRPF8,SF3B3,SNRNP70,SNRPD1,Srrm1,SSU72,SUPT5H,TRA2A,TXNL4A	18
RNA Post-Transcriptional Modification	splicing of RNA	2.06E-02	AHNAK,HNRNPA2B1,HNRNPC,HNRNPF,HNRNPM,JUN,LSM4,NONO,NPM1,PRPF8,SF3B3,SNRNP70,SNRPD1,Srrm1,TRA2A,TXNL4A	16
Small Molecule Biochemistry	metabolism of citric acid	3.16E-02	ACLY,ACO2,CS	3

## Sheet: genes by cellular localization
© 2000-2016 QIAGEN. All rights reserved.
Symbol	Entrez Gene Name	Networks	Location	Type(s)	Biomarker Application(s)	Drug(s)	Entrez Gene ID for Human	Entrez Gene ID for Mouse	Entrez Gene ID for Rat
26s Proteasome	--	22	Cytoplasm	complex		carfilzomib, bortezomib/sorafenib, bortezomib/paclitaxel, bortezomib/melphalan, bortezomib/doxorubicin, bortezomib/vorinostat, bortezomib/rituximab, belinostat/bortezomib, bortezomib
ABLIM	--	8	Cytoplasm	group
ACAA1	acetyl-CoA acyltransferase 1	24	Cytoplasm	enzyme	unspecified application	trimetazidine	30	113868	501072|24157
ACADVL	acyl-CoA dehydrogenase, very long chain		Cytoplasm	enzyme	unspecified application		37	11370	25363
ACBD3	acyl-CoA binding domain containing 3	17	Cytoplasm	other			64746	170760	289312
ACLY	ATP citrate lyase	24	Cytoplasm	enzyme	unspecified application		47	104112	24159
ACO2	aconitase 2	8	Cytoplasm	enzyme			50	11429	79250
ACOT2	acyl-CoA thioesterase 2	22	Cytoplasm	enzyme			10965	171210	192272
ACOT11	acyl-CoA thioesterase 11	22	Cytoplasm	enzyme	unspecified application		26027	329910	100363074
ACOT13	acyl-CoA thioesterase 13		Cytoplasm	enzyme			55856	66834	291135
ACOX1	acyl-CoA oxidase 1, palmitoyl		Cytoplasm	enzyme			51	11430	50681
ACSS2	acyl-CoA synthetase short-chain family member 2	24	Cytoplasm	enzyme			55902	60525	311569
ACTA2	actin, alpha 2, smooth muscle, aorta	6	Cytoplasm	other	efficacy		59	11475	81633
ACTB	actin, beta	4	Cytoplasm	other			60	11461	81822
ACTG1	actin gamma 1	3	Cytoplasm	other	unspecified application		71	11465	287876
Actin	--	3	Cytoplasm	group	response to therapy
ACTN4	actinin alpha 4	4	Cytoplasm	transcription regulator			81	60595	63836
ACTR10	actin-related protein 10 homolog		Cytoplasm	other			55860	56444	299121
ACTR1A	ARP1 actin-related protein 1 homolog A, centractin alpha		Cytoplasm	other			10121	54130	294010
ADCY	--	10	Cytoplasm	group
ADD1	adducin 1	20	Cytoplasm	other			118	11518	24170
AGPAT3	1-acylglycerol-3-phosphate O-acyltransferase 3	23	Cytoplasm	enzyme			56894	28169	294324
AGPAT4	1-acylglycerol-3-phosphate O-acyltransferase 4		Cytoplasm	enzyme			56895	68262	170919
AHSA1	AHA1, activator of heat shock 90kDa protein ATPase homolog 1 (yeast)	12	Cytoplasm	other			10598	217737	681996
AK1	adenylate kinase 1	1	Cytoplasm	kinase	unspecified application		203	11636	24183
AKAP12	A-kinase anchoring protein 12	3	Cytoplasm	transporter	unspecified application		9590	83397	83425
AKR1B1	aldo-keto reductase family 1, member B1 (aldose reductase)	5,24	Cytoplasm	enzyme		sorbinil	231	11677	24192
Akt	--	3	Cytoplasm	group	diagnosis,disease progression,efficacy,prognosis,response to therapy,safety	afuresertib, ipatasertib, ONC-201, AT13148, SR-13668, MSC2363318A
AKT1	v-akt murine thymoma viral oncogene homolog 1	7	Cytoplasm	kinase	diagnosis,efficacy,response to therapy	MK2206, GSK2141795, ipatasertib, LY2780301, ARQ 092, AZD5363, BAY1125976, MPT0E028, archexin, enzastaurin, perifosine	207	11651	24185
ALDH2	aldehyde dehydrogenase 2 family (mitochondrial)	17	Cytoplasm	enzyme	unspecified application	disulfiram, chlorpropamide	217	11669	29539
ALDH1A2	aldehyde dehydrogenase 1 family member A2		Cytoplasm	enzyme			8854	19378	116676
ALDH3A1	aldehyde dehydrogenase 3 family member A1	22	Cytoplasm	enzyme	diagnosis,unspecified application		218	11670	25375
ALDOA	aldolase, fructose-bisphosphate A	23	Cytoplasm	enzyme	unspecified application		226	11674	24189
ALKBH8	alkB homolog 8, tRNA methyltransferase	16	Cytoplasm	enzyme			91801	67667	366783
Alpha catenin	--	6	Cytoplasm	group
Alpha tubulin	--	7	Cytoplasm	group
AMD1	adenosylmethionine decarboxylase 1	22	Cytoplasm	enzyme			262	100041585|11702	81640
AMPK	--	8	Cytoplasm	complex
AP1S1	adaptor related protein complex 1 sigma 1 subunit		Cytoplasm	transporter			1174	11769	360785
AP2M1	adaptor related protein complex 2 mu 1 subunit		Cytoplasm	transporter			1173	11773	116563
APBA1	amyloid beta precursor protein binding family A member 1		Cytoplasm	transporter	diagnosis,response to therapy		320	319924	83589
APRT	adenine phosphoribosyltransferase	17	Cytoplasm	enzyme			353	11821	292072
ARF1	ADP ribosylation factor 1	23	Cytoplasm	enzyme			375	11840	64310
ARF3	ADP ribosylation factor 3		Cytoplasm	enzyme			377	11842	140940
ARF4	ADP ribosylation factor 4	25	Cytoplasm	enzyme			378	11843	79120
ARFGEF2	ADP ribosylation factor guanine nucleotide exchange factor 2		Cytoplasm	other			10564	99371	296380
ARHGAP26	Rho GTPase activating protein 26		Cytoplasm	other			23092	71302	307459
ARHGDIA	Rho GDP dissociation inhibitor alpha	10	Cytoplasm	other	unspecified application		396	192662	360678
ARHGEF2	Rho/Rac guanine nucleotide exchange factor 2	4,22	Cytoplasm	other			9181	16800	310635
ARHGEF12	Rho guanine nucleotide exchange factor 12		Cytoplasm	other			23365	69632	367072
ARHGEF25	Rho guanine nucleotide exchange factor 25	4	Cytoplasm	other			115557	52666	314904
ARPC2	actin related protein 2/3 complex subunit 2		Cytoplasm	other			10109	76709	301511
ARPC3	actin related protein 2/3 complex subunit 3		Cytoplasm	other			10094	56378	288669
ARPC5	actin related protein 2/3 complex subunit 5	18	Cytoplasm	other	unspecified application		10092	67771	360854
ARPC1B	actin related protein 2/3 complex subunit 1B		Cytoplasm	other			10095	11867	54227
ASNS	asparagine synthetase (glutamine-hydrolyzing)	7	Cytoplasm	enzyme			440	27053	25612
ATOX1	antioxidant 1 copper chaperone	16	Cytoplasm	transporter			475	11927	84355
ATP5A1	ATP synthase, H+ transporting, mitochondrial F1 complex, alpha subunit 1, cardiac muscle	3	Cytoplasm	transporter			498	11946	65262
ATP5B	ATP synthase, H+ transporting, mitochondrial F1 complex, beta polypeptide	1	Cytoplasm	transporter			506	11947	171374
ATP5C1	ATP synthase, H+ transporting, mitochondrial F1 complex, gamma polypeptide 1	21	Cytoplasm	transporter			509	11949	116550
ATP5D	ATP synthase, H+ transporting, mitochondrial F1 complex, delta subunit	19	Cytoplasm	transporter			513	66043	245965
Atp5e	ATP synthase, H+ transporting, mitochondrial F1 complex, epsilon subunit	14	Cytoplasm	transporter				67126	245958
ATP5G1	ATP synthase, H+ transporting, mitochondrial Fo complex subunit C1 (subunit 9)	19	Cytoplasm	transporter			516	11951	29754
ATP5G2	ATP synthase, H+ transporting, mitochondrial Fo complex subunit C2 (subunit 9)	21	Cytoplasm	transporter			517	67942	171082
ATP5G3	ATP synthase, H+ transporting, mitochondrial Fo complex subunit C3 (subunit 9)	19	Cytoplasm	transporter			518	228033	114630
ATP5H	ATP synthase, H+ transporting, mitochondrial Fo complex subunit D	19	Cytoplasm	enzyme			10476	71679	641434
ATP5J	ATP synthase, H+ transporting, mitochondrial Fo complex subunit F6	19	Cytoplasm	transporter			522	11957	94271
ATP5J2	ATP synthase, H+ transporting, mitochondrial Fo complex subunit F2	21	Cytoplasm	transporter			9551	57423	690441
Atp5k	ATP synthase, H+ transporting, mitochondrial F1F0 complex, subunit E	12	Cytoplasm	enzyme				11958	140608
ATP5L	ATP synthase, H+ transporting, mitochondrial Fo complex subunit G	19	Cytoplasm	enzyme			10632	27425	300677
ATP6V0C	ATPase H+ transporting V0 subunit c		Cytoplasm	transporter			527	11984	170667
ATP6V0E1	ATPase H+ transporting V0 subunit e1	22	Cytoplasm	transporter			8992	11974	94170
ATP6V1D	ATPase H+ transporting V1 subunit D	22	Cytoplasm	transporter			51382	73834	299159
ATP6V1F	ATPase H+ transporting V1 subunit F	11	Cytoplasm	enzyme			9296	66144	116664
B4GALT1	beta-1,4-galactosyltransferase 1	6	Cytoplasm	enzyme	diagnosis		2683	14595	24390
BACE2	beta-site APP-cleaving enzyme 2		Cytoplasm	peptidase			25825	56175	288227
BAG1	BCL2 associated athanogene 1	8	Cytoplasm	other			573	12017	297994
BCL2	B-cell CLL/lymphoma 2	20	Cytoplasm	transporter	diagnosis,efficacy,prognosis,unspecified application	oblimersen, rasagiline, (-)-gossypol, navitoclax, gemcitabine/paclitaxel, bortezomib/paclitaxel, venetoclax, paclitaxel/trastuzumab, paclitaxel/pertuzumab/trastuzumab, lapatinib/paclitaxel, doxorubicin/paclitaxel, epirubicin/paclitaxel, paclitaxel/ramucirumab, paclitaxel/topotecan, paclitaxel	596	12043	24224
Beta Secretase	--		Cytoplasm	group
BLOC1S1	biogenesis of lysosomal organelles complex 1 subunit 1	25	Cytoplasm	other			2647	14533	288785
BMX	BMX non-receptor tyrosine kinase		Cytoplasm	kinase			660	12169	367786
BNIP2	BCL2/adenovirus E1B 19kDa interacting protein 2	5	Cytoplasm	other			663	12175	300811
BTRC	beta-transducin repeat containing E3 ubiquitin protein ligase		Cytoplasm	enzyme			8945	12234	361765
C6orf89	chromosome 6 open reading frame 89		Cytoplasm	other			221477	80748	294311
Calcineurin protein(s)	--	1	Cytoplasm	complex
CALR	calreticulin	3	Cytoplasm	transcription regulator	unspecified application		811	12317	64202
CANX	calnexin	3	Cytoplasm	other			821	12330	29144
CAPN2	calpain 2	5	Cytoplasm	peptidase			824	12334	29154
CAPNS1	calpain small subunit 1	5	Cytoplasm	peptidase			826	12336	29156|100912380|100911363
CARHSP1	calcium regulated heat stable protein 1	24	Cytoplasm	other			23589	52502	260416
caspase	--	5	Cytoplasm	group		pancaspase inhibitor
Caspase 3/7	--	18	Cytoplasm	group
CCM2	CCM2 scaffolding protein	4	Cytoplasm	other			83605	216527	305505
CCT2	chaperonin containing TCP1 subunit 2	16,17	Cytoplasm	kinase			10576	12461	299809
CCT5	chaperonin containing TCP1 subunit 5	16	Cytoplasm	other			22948	12465	294864
Cdc2	--	2	Cytoplasm	group
CDIPT	CDP-diacylglycerol--inositol 3-phosphatidyltransferase	13	Cytoplasm	enzyme			10423	52858	192260
CDV3	CDV3 homolog	25	Cytoplasm	other			55573	102639170|321022	315970
CHCHD2	coiled-coil-helix-coiled-coil-helix domain containing 2	3	Cytoplasm	other			51142	14004|433806	100911516|316643
CHCHD4	coiled-coil-helix-coiled-coil-helix domain containing 4		Cytoplasm	enzyme			131474	72170	100361898|312559
CHMP2B	charged multivesicular body protein 2B	21	Cytoplasm	other			25978	68942	363720
CHPF	chondroitin polymerizing factor		Cytoplasm	enzyme			79586	74241	316533
CKAP4	cytoskeleton-associated protein 4		Cytoplasm	other			10970	216197	362859
CNN2	calponin 2		Cytoplasm	other			1265	12798	690976
CNN3	calponin 3		Cytoplasm	other			1266	71994	54321
Cofilin	--	4	Cytoplasm	group
COMT	catechol-O-methyltransferase	6	Cytoplasm	enzyme	diagnosis,efficacy,prognosis,unspecified application	carbidopa/entacapone/levodopa, BIA-3-202, tolcapone, entacapone	1312	12846	24267
COPA	coatomer protein complex subunit alpha	7	Cytoplasm	transporter			1314	12847	304978
COPB2	coatomer protein complex subunit beta 2	7	Cytoplasm	transporter			9276	50797	60384
CORO1C	coronin 1C		Cytoplasm	other			23603	23790	501841
COX4I1	cytochrome c oxidase subunit 4I1	3,25	Cytoplasm	enzyme			1327	12857	29445
COX5A	cytochrome c oxidase subunit 5A	3	Cytoplasm	enzyme			9377	12858	252934
COX6A1	cytochrome c oxidase subunit 6A1	3	Cytoplasm	enzyme			1337	12861	25282
Cox6c	cytochrome c oxidase subunit VIc	2	Cytoplasm	enzyme				12864	54322
Cox7a2/Cox7a2l2	cytochrome c oxidase subunit VIIa polypeptide 2-like 2		Cytoplasm	other					688386|29507
COX7A2L	cytochrome c oxidase subunit 7A2 like	11	Cytoplasm	enzyme			9167	20463	298762
COX7B	cytochrome c oxidase subunit 7B	11	Cytoplasm	enzyme			1349	66142	303393
COX8A	cytochrome c oxidase subunit 8A	11	Cytoplasm	enzyme			1351	12868	171335
CPT1C	carnitine palmitoyltransferase 1C		Cytoplasm	enzyme			126129	78070	308579
CRIP1	cysteine rich protein 1		Cytoplasm	other	unspecified application		1396	12925	691657
CS	citrate synthase	24	Cytoplasm	enzyme			1431	12974	170587
CSNK1D	casein kinase 1 delta		Cytoplasm	kinase			1453	104318	64462
CSNK1E	casein kinase 1 epsilon	16	Cytoplasm	kinase			1454	27373	58822
CSNK2B	casein kinase 2 beta	23	Cytoplasm	kinase			1460	13001	81650
CSTB	cystatin B	20	Cytoplasm	peptidase	diagnosis		1476	13014	25308
CTSB	cathepsin B	6	Cytoplasm	peptidase			1508	13030	64529
CTSV	cathepsin V	6	Cytoplasm	peptidase			1515	13039	25697
CTSZ	cathepsin Z		Cytoplasm	peptidase			1522	64138	252929
CYB5B	cytochrome b5 type B	24	Cytoplasm	enzyme			80777	66427	80773
CYB5R4	cytochrome b5 reductase 4		Cytoplasm	enzyme			51167	266690	171015
CYBA	cytochrome b-245 alpha chain	1	Cytoplasm	enzyme			1535	13057	79129
CYBB	cytochrome b-245, beta polypeptide		Cytoplasm	enzyme			1536	13058	66021
CYP2C8	cytochrome P450 family 2 subfamily C member 8	24	Cytoplasm	enzyme			1558	13095|13097|13098	29298
CYP2U1	cytochrome P450 family 2 subfamily U member 1		Cytoplasm	enzyme			113612	71519	310848
cytochrome C	--	5	Cytoplasm	group	unspecified application
DAD1	defender against cell death 1	5	Cytoplasm	other			1603	13135	192275
DBI	diazepam binding inhibitor (GABA receptor modulator, acyl-CoA binding protein)	24	Cytoplasm	other			1622	13167	25045
DCTN1	dynactin subunit 1	22	Cytoplasm	other			1639	13191	29167
DCTN6	dynactin subunit 6		Cytoplasm	enzyme			10671	22428	290798
DDIT4	DNA damage inducible transcript 4	4	Cytoplasm	other			54541	74747	140942
DDOST	dolichyl-diphosphooligosaccharide--protein glycosyltransferase non-catalytic subunit	15	Cytoplasm	enzyme			1650	13200	313648
DECR1	2,4-dienoyl-CoA reductase 1, mitochondrial	24	Cytoplasm	enzyme	unspecified application		1666	67460	117543
DENND5A	DENN domain containing 5A		Cytoplasm	other			23258	19347	308942
DERL2	derlin 2	7	Cytoplasm	other			51009	116891	100910823
DNAJB11	DnaJ heat shock protein family (Hsp40) member B11	15	Cytoplasm	other			51726	67838	360734
Dynamin	--	9	Cytoplasm	group
DYNC1H1	dynein cytoplasmic 1 heavy chain 1	17	Cytoplasm	peptidase			1778	13424	29489
Dync1i2	dynein cytoplasmic 1 intermediate chain 2		Cytoplasm	other				13427	116659
DYNLT1	dynein light chain Tctex-type 1		Cytoplasm	other			6993	100040531|100040563|100310872|21648	83462
EBP	emopamil binding protein (sterol isomerase)		Cytoplasm	enzyme		SR 31747	10682	13595	117278
EDEM1	ER degradation enhancing alpha-mannosidase like protein 1	15	Cytoplasm	enzyme			9695	192193	297504
EEF2	eukaryotic translation elongation factor 2	6	Cytoplasm	translation regulator			1938	13629	29565
EEF1A1	eukaryotic translation elongation factor 1 alpha 1	3	Cytoplasm	translation regulator			1915	13627	171361
EEF1B2	eukaryotic translation elongation factor 1 beta 2	3	Cytoplasm	translation regulator			1933	55949	363241
EEF1D	eukaryotic translation elongation factor 1 delta		Cytoplasm	translation regulator			1936	66656	300033
EEF1G	eukaryotic translation elongation factor 1 gamma		Cytoplasm	translation regulator			1937	67160	293725
EGLN2	egl-9 family hypoxia-inducible factor 2	6	Cytoplasm	enzyme	prognosis		112398	112406	308457
EHD1	EH domain containing 1	9	Cytoplasm	other			10938	13660	293692
EHHADH	enoyl-CoA, hydratase/3-hydroxyacyl CoA dehydrogenase	24	Cytoplasm	enzyme			1962	74147	171142
EIF2B2	eukaryotic translation initiation factor 2B subunit beta		Cytoplasm	other			8892	217715	84005
EIF3D	eukaryotic translation initiation factor 3 subunit D	20	Cytoplasm	other			8664	55944	362952
EIF3G	eukaryotic translation initiation factor 3 subunit G	20	Cytoplasm	other			8666	53356	298700
EIF3K	eukaryotic translation initiation factor 3 subunit K		Cytoplasm	translation regulator			27335	73830	292762
EIF3M	eukaryotic translation initiation factor 3 subunit M	23	Cytoplasm	other			10480	98221	295975
EIF4A1	eukaryotic translation initiation factor 4A1	8,16	Cytoplasm	translation regulator			1973	13681	287436
EIF4E	eukaryotic translation initiation factor 4E	16,25	Cytoplasm	translation regulator	prognosis		1977	13684	117045
EIF4EBP1	eukaryotic translation initiation factor 4E binding protein 1	4	Cytoplasm	translation regulator	efficacy		1978	13685	116636
Eif4g	--	4,25	Cytoplasm	group
EIF4G1	eukaryotic translation initiation factor 4 gamma 1	8,16	Cytoplasm	translation regulator			1981	208643	287986
EIF4H	eukaryotic translation initiation factor 4H		Cytoplasm	translation regulator			7458	22384	288599
EIF5A	eukaryotic translation initiation factor 5A		Cytoplasm	translation regulator			1984	276770	287444
ELAVL1	ELAV like RNA binding protein 1	13	Cytoplasm	other	efficacy		1994	15568	363854
ELOVL1	ELOVL fatty acid elongase 1		Cytoplasm	enzyme			64834	54325	679532
ELOVL6	ELOVL fatty acid elongase 6	24	Cytoplasm	enzyme			79071	170439	102549542|171402
ENO1	enolase 1	1	Cytoplasm	enzyme	diagnosis		2023	13806|433182	24333
ERK1/2	--	4	Cytoplasm	group
ERN1	endoplasmic reticulum to nucleus signaling 1	15	Cytoplasm	kinase			2081	78943	498013
ERO1B	endoplasmic reticulum oxidoreductase beta	15	Cytoplasm	enzyme			56605	67475	364755
ERP29	endoplasmic reticulum protein 29	15	Cytoplasm	transporter			10961	67397	117030
FAM129B	family with sequence similarity 129 member B		Cytoplasm	other			64855	227737	362115
FAU	Finkel-Biskis-Reilly murine sarcoma virus (FBR-MuSV) ubiquitously expressed	11	Cytoplasm	other			2197	14109	100360647|29752|687780
FDPS	farnesyl diphosphate synthase		Cytoplasm	enzyme		alendronate/cholecalciferol, zoledronic acid, minodronate, ibandronic acid, risedronic acid, alendronic acid, pamidronic acid	2224	110196	83791
FIS1	fission, mitochondrial 1	17	Cytoplasm	other			51024	66437	288584
FKBP10	FK506 binding protein 10	15	Cytoplasm	enzyme			60681	14230	360627
FKBP11	FK506 binding protein 11	15	Cytoplasm	enzyme			51303	66120	300211
FKBP1A	FK506 binding protein 1A	10	Cytoplasm	enzyme	unspecified application	methotrexate/sirolimus/tacrolimus, everolimus/exemestane, imatinib/sirolimus, cyclophosphamide/sirolimus, cyclosporine A/tacrolimus, cyclosporine A/sirolimus/tacrolimus, everolimus/panobinostat, everolimus/pasireotide, everolimus/sorafenib, sirolimus, temsirolimus, tacrolimus, everolimus	2280	14225	25639
FLNA	filamin A	9	Cytoplasm	other	unspecified application		2316	192176	293860
FLNC	filamin C	7	Cytoplasm	other	diagnosis		2318	68794	362332
FMR1	fragile X mental retardation 1		Cytoplasm	translation regulator			2332	14265	24948
FNTA	farnesyltransferase, CAAX box, alpha		Cytoplasm	enzyme		lonafarnib	2339	14272	25318
Focal adhesion kinase	--	5	Cytoplasm	group		defactinib, GSK2256098, PND-1186, CEP-37440
FTH1	ferritin, heavy polypeptide 1	5	Cytoplasm	enzyme	unspecified application		2495	14319	25319|689130
FTL	ferritin, light polypeptide	23	Cytoplasm	enzyme	diagnosis,unspecified application		2512	434624|14325	29292|100360087|100362384|100359668|100363177
FXN	frataxin		Cytoplasm	kinase			2395	14297	499335
G-protein beta	--	10	Cytoplasm	group
GABARAP	GABA type A receptor-associated protein	20	Cytoplasm	transporter			11337	56486	58974
GABARAPL1	GABA type A receptor associated protein like 1		Cytoplasm	other			23710	57436	689161
GANAB	glucosidase II alpha subunit		Cytoplasm	enzyme		miglitol	23193	14376	293721
GAPDH	glyceraldehyde-3-phosphate dehydrogenase	1	Cytoplasm	enzyme	diagnosis,unspecified application		2597	100042025|14433	24383
GARS	glycyl-tRNA synthetase		Cytoplasm	enzyme			2617	353172	297113
GDI2	GDP dissociation inhibitor 2	23	Cytoplasm	other			2665	14569	29662
GGA1	golgi-associated, gamma adaptin ear containing, ARF binding protein 1		Cytoplasm	transporter			26088	106039	300066
GHITM	growth hormone inducible transmembrane protein		Cytoplasm	other	unspecified application		27069	66092	290596
GLG1	golgi glycoprotein 1		Cytoplasm	other			2734	20340	29476
GLIPR2	GLI pathogenesis related 2		Cytoplasm	other			152007	384009	679819
GLRX3	glutaredoxin 3	1	Cytoplasm	enzyme			10539	30926	58815
GMFB	glia maturation factor beta	1	Cytoplasm	growth factor			2764	63985	81661
GOLGA3	golgin A3	15	Cytoplasm	transporter			2802	269682	312077
GOLGA7	golgin A7		Cytoplasm	other			51125	57437	361171
GOSR2	golgi SNAP receptor complex member 2	15	Cytoplasm	transporter			9570	56494	64154
GPX1	glutathione peroxidase 1	1	Cytoplasm	enzyme	diagnosis,efficacy		2876	14775	24404
GPX4	glutathione peroxidase 4	5	Cytoplasm	enzyme			2879	625249	29328
GPX8	glutathione peroxidase 8 (putative)		Cytoplasm	enzyme			493869	69590	294744
Gsk3	--	7	Cytoplasm	group	efficacy	glycogen synthase kinase-3 inhibitor, LY2090314
GSTP1	glutathione S-transferase pi 1	13	Cytoplasm	enzyme	diagnosis,efficacy,prognosis,safety,unspecified application		2950	100042625|14869|14870	24426
HACE1	HECT domain and ankyrin repeat containing E3 ubiquitin protein ligase 1		Cytoplasm	enzyme			57531	209462	361866
HADH	hydroxyacyl-CoA dehydrogenase	24	Cytoplasm	enzyme	unspecified application		3033	15107	113965
HAP1	huntingtin-associated protein 1	22	Cytoplasm	other			9001	15114	29430
HAX1	HCLS1 associated protein X-1	10	Cytoplasm	other			10456	23897	291202
HBB	hemoglobin subunit beta		Cytoplasm	transporter		iron dextran	3043	100503605|101488143	100134871|689064|24440|361619
HCCS	holocytochrome c synthase		Cytoplasm	enzyme			3052	15159	317444
HGS	hepatocyte growth factor-regulated tyrosine kinase substrate	13	Cytoplasm	other			9146	15239	56084
HK1	hexokinase 1	5	Cytoplasm	kinase			3098	15275	25058
HM13	histocompatibility (minor) 13	2	Cytoplasm	peptidase			81502	14950	311545
HMOX1	heme oxygenase 1	23	Cytoplasm	enzyme	efficacy,safety,unspecified application	tin mesoporphyrin	3162	15368	24451
HPRT1	hypoxanthine phosphoribosyltransferase 1	9	Cytoplasm	enzyme		6-mercaptopurine, thioguanine, azathioprine, cyclophosphamide/cytarabine/6-mercaptopurine	3251	15452	24465
HSD17B10	hydroxysteroid (17-beta) dehydrogenase 10	8	Cytoplasm	enzyme			3028	15108	63864
Hsp70	--	3	Cytoplasm	group	unspecified application
Hsp90	--	3	Cytoplasm	group		PU-H71, telatinib, ganetespib, BIIB021, PF-4929113, XL 888, DS-2248, AT13387, AB-010, tanespimycin, anthracycline
HSP90AA1	heat shock protein 90kDa alpha family class A member 1	2	Cytoplasm	enzyme	safety,unspecified application	alvespimycin, retaspimycin, luminespib, cisplatin	3320	15519	299331
HSP90AB1	heat shock protein 90kDa alpha family class B member 1	7,16	Cytoplasm	enzyme		alvespimycin, retaspimycin, cisplatin	3326	15516	301252
HSP90B1	heat shock protein 90kDa beta family member 1	1	Cytoplasm	other		alvespimycin, retaspimycin, cisplatin	7184	22027	362862
HSPA5	heat shock protein family A (Hsp70) member 5	1	Cytoplasm	enzyme	unspecified application		3309	14828	25617
HSPA8	heat shock protein family A (Hsp70) member 8	1	Cytoplasm	enzyme	diagnosis		3312	15481	24468
HSPB1	heat shock protein family B (small) member 1	3	Cytoplasm	other	diagnosis,efficacy		3315	15507	24471
HSPE1	heat shock protein family E (Hsp10) member 1	20	Cytoplasm	enzyme			3336	15528	25462
HTRA2	HtrA serine peptidase 2	10	Cytoplasm	peptidase			27429	64704	297376
HTT	huntingtin	19,21,22	Cytoplasm	transcription regulator	unspecified application		3064	15194	29424
IDH2	isocitrate dehydrogenase (NADP(+)) 2, mitochondrial		Cytoplasm	enzyme			3418	269951	361596
IDH3G	isocitrate dehydrogenase 3 (NAD(+)) gamma		Cytoplasm	enzyme			3421	15929	25179
IGF2BP1	insulin like growth factor 2 mRNA binding protein 1		Cytoplasm	translation regulator			10642	140486	303477
IMP3	IMP3, U3 small nucleolar ribonucleoprotein		Cytoplasm	other			55272	102462	315697
IMPDH2	IMP (inosine 5'-monophosphate) dehydrogenase 2	6	Cytoplasm	enzyme		thioguanine, VX-944, pegintron/ribavirin, interferon alfacon-1/ribavirin, interferon alfa-2b/ribavirin, mycophenolate mofetil, mycophenolic acid, ribavirin	3615	100042069|23918	301005
INF2	inverted formin, FH2 and WH2 domain containing	5	Cytoplasm	other			64423	70435	362790
IQGAP1	IQ motif containing GTPase activating protein 1	17	Cytoplasm	other			8826	29875	361598
ITSN1	intersectin 1	4	Cytoplasm	other			6453	16443	29491
JKAMP	JNK1/MAPK8-associated membrane protein	5	Cytoplasm	other			51528	104771	299127
Jnk	--	6,18	Cytoplasm	group		JNK inhibitor
KARS	lysyl-tRNA synthetase		Cytoplasm	enzyme	unspecified application		3735	85305	292028
KAT2A	lysine acetyltransferase 2A		Cytoplasm	enzyme			2648	14534	303539
KIAA0368	KIAA0368	22	Cytoplasm	other			23392	230249
KIF20A	kinesin family member 20A	24	Cytoplasm	transporter			10112	19348	361308
KIF5A	kinesin family member 5A	13	Cytoplasm	transporter			3798	16572	314906
KLHL22	kelch like family member 22		Cytoplasm	other			84861	224023	303792
KRAS	Kirsten rat sarcoma viral oncogene homolog		Cytoplasm	enzyme	diagnosis,efficacy,prognosis,response to therapy,unspecified application		3845	16653	24525
LARP1	La ribonucleoprotein domain family member 1	4	Cytoplasm	translation regulator			23367	73158	303158
LASP1	LIM and SH3 protein 1	19	Cytoplasm	transporter			3927	16796	29278
Ldha/RGD1562690	lactate dehydrogenase A	5	Cytoplasm	enzyme					500965|24533
let-7	microRNA let-7a-1	24	Cytoplasm	microRNA	unspecified application		406889|406883|406887|406888|407054|406885|406881|406891|406890|406882|406884|406886	387251|723947|723965|387248|387244|723966|387253|387245|387252|387249|387247|387246	100526596|100314213|100526574|100313991|100313990|100314184|100313993|104796557|100314224|100314018|100313989|100313972|100314277|100313992
let-7a-5p (and other miRNAs w/seed GAGGUAG)	--		Cytoplasm	mature microRNA	unspecified application
LIN28B	lin-28 homolog B		Cytoplasm	other			389421	380669	689054
LMAN1	lectin, mannose binding 1	1	Cytoplasm	other			3998	70361	116666
LMAN2	lectin, mannose binding 2	12	Cytoplasm	transporter			10960	66890	290994
LMF1	lipase maturation factor 1		Cytoplasm	other			64788	76483	360495
LOC100359583/Ptma	prothymosin alpha	20	Cytoplasm	other					29222|100359583
LSM5	LSM5 homolog, U6 small nuclear RNA and mRNA degradation associated	25	Cytoplasm	other			23658	66373	306222
LSP1	lymphocyte-specific protein 1	12	Cytoplasm	other			4046	16985	361680
LSS	lanosterol synthase (2,3-oxidosqualene-lanosterol cyclase)	24	Cytoplasm	enzyme		oxiconazole	4047	16987	81681
LXN	latexin	13	Cytoplasm	other			56925	17035	59073
MAP2K1/2	--	6	Cytoplasm	group
MAP3K1	mitogen-activated protein kinase kinase kinase 1		Cytoplasm	kinase			4214	26401	116667|100912399
MAP3K14	mitogen-activated protein kinase kinase kinase 14	21	Cytoplasm	kinase			9020	53859	360640
MAP4K4	mitogen-activated protein kinase kinase kinase kinase 4	14	Cytoplasm	kinase			9448	26921	301363
Mapk	--	10	Cytoplasm	group	diagnosis,disease progression,efficacy,prognosis,response to therapy	MAP kinase inhibitor
MAPK10	mitogen-activated protein kinase 10		Cytoplasm	kinase			5602	26414	25272
MCFD2	multiple coagulation factor deficiency 2	15	Cytoplasm	other			90411	193813	246117
MDH2	malate dehydrogenase 2		Cytoplasm	enzyme			4191	17448	81829
Mek	--	4	Cytoplasm	group	efficacy,safety	PD 0325901, selumetinib, WX-554, GDC-0623, MAP kinase kinase inhibitor, RO-4987655, BI 847325
MFN2	mitofusin 2		Cytoplasm	enzyme	unspecified application		9927	170731	100911485|64476
MGAT1	mannosyl (alpha-1,3-)-glycoprotein beta-1,2-N-acetylglucosaminyltransferase	20	Cytoplasm	enzyme			4245	17308	81519
MIA3	melanoma inhibitory activity family member 3	10	Cytoplasm	other			375056	338366	683007
MICAL1	microtubule associated monooxygenase, calponin and LIM domain containing 1		Cytoplasm	enzyme			64780	171580	294520
mir-34	microRNA 34a		Cytoplasm	microRNA	diagnosis,unspecified application		407041|407040|407042	723932|723848|723849	100314015|100314188|100314014
mir-96	microRNA 96		Cytoplasm	microRNA			407053	723886	100314017
mir-122	microRNA 122		Cytoplasm	microRNA			406906|100616357	387231	100314023|100526608
mir-145	microRNA 145		Cytoplasm	microRNA	unspecified application		406937	387163	100314036
mir-183	microRNA 183		Cytoplasm	microRNA			406959	387178	100314041
mir-193	microRNA 193a		Cytoplasm	microRNA			406968|574455	100124432|387188	100526630|104797223|100314244
mir-196	microRNA 196b		Cytoplasm	microRNA	unspecified application		442920|406972|406973	387191|723820|723958	100314048|100314164|104796626|100314204
mir-216	microRNA 216a		Cytoplasm	microRNA			406998|100126319	735308|387212	100526583|100314216
mir-373	microRNA 373		Cytoplasm	microRNA			442918
mir-515	microRNA 520c		Cytoplasm	microRNA	diagnosis,unspecified application		574494|574476|574469|574489|574482|574480|574477|574498|574465|574472|100302265|574485|574478|574467|574468|574473|574461|574462|574488|574500|574495|574490|574492|574491|574481|574479|574470|574474|574463|574487|574497|574471|574493|574486|574483|574464|574496|574484|574475|574499|574466|100302205
mir-1301	microRNA 1301		Cytoplasm	microRNA			100302246
miR-16-5p (and other miRNAs w/seed AGCAGCA)	--		Cytoplasm	mature microRNA	unspecified application
miR-183-5p (miRNAs w/seed AUGGCAC)	--		Cytoplasm	mature microRNA
miR-196a-5p (and other miRNAs w/seed AGGUAGU)	--		Cytoplasm	mature microRNA	unspecified application
miR-204-5p (and other miRNAs w/seed UCCCUUU)	--		Cytoplasm	mature microRNA
MMADHC	methylmalonic aciduria and homocystinuria, cblD type		Cytoplasm	other			27249	109129	362134
MRPL11	mitochondrial ribosomal protein L11		Cytoplasm	other			65003	66419	293666
MRPL14	mitochondrial ribosomal protein L14		Cytoplasm	other			64928	68463	301250
MRPL51	mitochondrial ribosomal protein L51		Cytoplasm	other			51258	66493	297601
MRPS6	mitochondrial ribosomal protein S6	8	Cytoplasm	other			64968	121022	100360017
MRPS7	mitochondrial ribosomal protein S7		Cytoplasm	other			51081	50529	113958
MRPS12	mitochondrial ribosomal protein S12		Cytoplasm	other			6183	24030	292758
MT-ATP8	ATP synthase F0 subunit 8		Cytoplasm	enzyme			4509
MT-CO1	cytochrome c oxidase subunit I	3	Cytoplasm	enzyme			4512	17708	26195
MT-CO2	cytochrome c oxidase subunit II	8	Cytoplasm	enzyme			4513	17709	26198
MT-CO3	cytochrome c oxidase III		Cytoplasm	enzyme			4514	17710	26204
MT-ND2	MTND2	25	Cytoplasm	enzyme	unspecified application		4536	17717	26194
MT-ND3	NADH dehydrogenase, subunit 3 (complex I)	19	Cytoplasm	enzyme			4537	17718	26199
MT-ND4	NADH dehydrogenase, subunit 4 (complex I)	25	Cytoplasm	enzyme	unspecified application		4538	17719	26201
MTCH1	mitochondrial carrier 1		Cytoplasm	other			23787	56462	294313
MTCH2	mitochondrial carrier 2	6	Cytoplasm	other			23788	56428	295922
MTHFD1	methylenetetrahydrofolate dehydrogenase (NADP+ dependent) 1, methenyltetrahydrofolate cyclohydrolase, formyltetrahydrofolate synthetase	22	Cytoplasm	enzyme			4522	108156	64300
MTIF2	mitochondrial translational initiation factor 2		Cytoplasm	translation regulator			4528	76784	305606
MTM1	myotubularin 1		Cytoplasm	phosphatase			4534	17772	288762
MTORC1	--	4	Cytoplasm	complex		everolimus/panobinostat, DCBCI0901, DS-3078a, ABTL0812, BI 860585, everolimus
MTORC2	--	5	Cytoplasm	complex		CC-115, sapanisertib, DCBCI0901, DS-3078a, ABTL0812, BI 860585
MYH2	myosin, heavy chain 2, skeletal muscle, adult	22	Cytoplasm	enzyme			4620	17882	691644
MYH4	myosin, heavy chain 4, skeletal muscle	22	Cytoplasm	enzyme			4622	17884	360543
MYH9	myosin, heavy chain 9, non-muscle	8	Cytoplasm	enzyme	unspecified application		4627	17886	100911597
MYH10	myosin, heavy chain 10, non-muscle		Cytoplasm	other	unspecified application		4628	77579	79433
MYL6	myosin light chain 6	22	Cytoplasm	other			4637	17904	685867
MYL9	myosin light chain 9	20	Cytoplasm	other			10398	98932	296313
MYO9B	myosin IXB		Cytoplasm	enzyme			4650	17925	25486
NACA	nascent polypeptide-associated complex alpha subunit	6	Cytoplasm	transcription regulator			4666	17938	288770
Naip1 (includes others)	NLR family, apoptosis inhibitory protein 1		Cytoplasm	other				17952|17951|17940	191568|294691
NAPA	NSF attachment protein alpha	9	Cytoplasm	transporter			8775	108124	140673
NDOR1	NADPH dependent diflavin oxidoreductase 1		Cytoplasm	enzyme			27158	78797	311799
NDUFA1	NADH:ubiquinone oxidoreductase subunit A1	2	Cytoplasm	enzyme			4694	54405	363441
NDUFA2	NADH:ubiquinone oxidoreductase subunit A2	21	Cytoplasm	enzyme			4695	17991	291660
NDUFA3	NADH:ubiquinone oxidoreductase subunit A3	19	Cytoplasm	enzyme			4696	66091	691001|684509
NDUFA5	NADH:ubiquinone oxidoreductase subunit A5	14	Cytoplasm	enzyme			4698	68202	25488
NDUFA7	NADH:ubiquinone oxidoreductase subunit A7	14	Cytoplasm	enzyme			4701	66416	299643
NDUFA12	NADH:ubiquinone oxidoreductase subunit A12		Cytoplasm	enzyme			55967	66414	299739
NDUFA13	NADH:ubiquinone oxidoreductase subunit A13	10	Cytoplasm	enzyme			51079	67184	100911483
NDUFB3	NADH:ubiquinone oxidoreductase subunit B3	14	Cytoplasm	enzyme			4709	66495	301427
NDUFB4	NADH:ubiquinone oxidoreductase subunit B4	19	Cytoplasm	transporter			4710	100041273|100042503|68194	691675|100361934|288088
NDUFB6	NADH:ubiquinone oxidoreductase subunit B6	11	Cytoplasm	enzyme			4712	230075	297990
NDUFB7	NADH:ubiquinone oxidoreductase subunit B7	14	Cytoplasm	enzyme			4713	66916	361385
NDUFB8	NADH:ubiquinone oxidoreductase subunit B8	13	Cytoplasm	enzyme			4714	67264	293991
NDUFB9	NADH:ubiquinone oxidoreductase subunit B9	19	Cytoplasm	enzyme			4715	66218	299954
NDUFB10	NADH:ubiquinone oxidoreductase subunit B10	11	Cytoplasm	enzyme			4716	68342	681418
NDUFC2	NADH:ubiquinone oxidoreductase subunit C2	11	Cytoplasm	enzyme			4718	68197	293130
NDUFS3	NADH:ubiquinone oxidoreductase core subunit S3	14	Cytoplasm	enzyme			4722	68349	295923
NDUFS4	NADH:ubiquinone oxidoreductase subunit S4	14	Cytoplasm	enzyme			4724	17993	499529
Ndufs5	NADH dehydrogenase (ubiquinone) Fe-S protein 5	11	Cytoplasm	other				595136	100363268|362588
Ndufs6	NADH dehydrogenase (ubiquinone) Fe-S protein 6		Cytoplasm	enzyme					29478
NDUFS7	NADH:ubiquinone oxidoreductase core subunit S7	8	Cytoplasm	enzyme			374291	75406	362837
NDUFV1	NADH:ubiquinone oxidoreductase core subunit V1	3	Cytoplasm	enzyme			4723	17995	293655
NDUFV2	NADH:ubiquinone oxidoreductase core subunit V2	19	Cytoplasm	enzyme			4729	72900	81728
NDUFV3	NADH:ubiquinone oxidoreductase subunit V3		Cytoplasm	enzyme			4731	78330	64539
Nedd4	neural precursor cell expressed, developmentally down-regulated 4	9	Cytoplasm	enzyme				17999	25489
NQO1	NAD(P)H quinone dehydrogenase 1	23	Cytoplasm	enzyme	diagnosis,unspecified application		1728	18104	24314
NREP	neuronal regeneration related protein		Cytoplasm	other			9315	27528	338475
NSFL1C	NSFL1 cofactor	7	Cytoplasm	other			55968	386649	83809
NT5C	5', 3'-nucleotidase, cytosolic	22	Cytoplasm	phosphatase	efficacy		30833	50773	100360582
NUCB1	nucleobindin 1	20	Cytoplasm	other	diagnosis		4924	18220	84595
NUDT3	nudix hydrolase 3	16	Cytoplasm	phosphatase			11165	56409	294292
OAZ1	ornithine decarboxylase antizyme 1	5	Cytoplasm	enzyme	diagnosis		4946	18245	25502
ODC1	ornithine decarboxylase 1		Cytoplasm	enzyme	efficacy	tazarotene, eflornithine	4953	18263	24609
OGDH	oxoglutarate dehydrogenase		Cytoplasm	enzyme			4967	18293	360975
OMA1	OMA1 zinc metallopeptidase		Cytoplasm	peptidase			115209	67013	298282
OSBPL5	oxysterol binding protein like 5		Cytoplasm	transporter			114879	79196	361686
P38 MAPK	--	9	Cytoplasm	group
P4HB	prolyl 4-hydroxylase subunit beta	3	Cytoplasm	enzyme			5034	18453	25506
p70 S6k	--	10	Cytoplasm	group	efficacy	AT13148, LY-2584702, MSC2363318A
p85 (pik3r)	--	7	Cytoplasm	group
PABPC1	poly(A) binding protein cytoplasmic 1	1	Cytoplasm	translation regulator			26986	18458	171350
PACSIN2	protein kinase C and casein kinase substrate in neurons 2	9	Cytoplasm	transporter			11252	23970	124461
PAFAH1B1	platelet activating factor acetylhydrolase 1b regulatory subunit 1	17	Cytoplasm	enzyme			5048	18472	83572
PAFAH1B2	platelet activating factor acetylhydrolase 1b catalytic subunit 2		Cytoplasm	enzyme			5049	18475	64189
PAFAH1B3	platelet activating factor acetylhydrolase 1b catalytic subunit 3		Cytoplasm	enzyme			5050	18476	114113
PAK4	p21 protein (Cdc42/Rac)-activated kinase 4	17	Cytoplasm	kinase		KPT-9274	10298	70584	292756
PAM16	presequence translocase-associated motor 16 homolog (S. cerevisiae)	18	Cytoplasm	other			51025	66449	679907
PAQR3	progestin and adipoQ receptor family member 3		Cytoplasm	other			152559	231474	305203
PBLD	phenazine biosynthesis like protein domain containing	24	Cytoplasm	enzyme			64081	68371	171564|100360692
PDCL	phosducin like	16,17	Cytoplasm	enzyme	unspecified application		5082	67466	64013
PDE1C	phosphodiesterase 1C	13	Cytoplasm	enzyme			5137	18575	81742
PDE4C	phosphodiesterase 4C	13	Cytoplasm	enzyme		dyphylline, nitroglycerin, caffeine/ergotamine, arofylline, tetomilast, L 869298, ibudilast, aminophylline, anagrelide, cilomilast, milrinone, dipyridamole, L-826,141, ketotifen, roflumilast, tolbutamide, theophylline, pentoxifylline, caffeine	5143	110385	290646
PDIA3	protein disulfide isomerase family A member 3	3	Cytoplasm	peptidase	diagnosis		2923	14827	29468
PDIA6	protein disulfide isomerase family A member 6		Cytoplasm	enzyme			10130	71853	286906
PDRG1	p53 and DNA damage regulated 1	15	Cytoplasm	other	diagnosis		81572	68559	296278
PEBP1	phosphatidylethanolamine binding protein 1	10	Cytoplasm	other	unspecified application		5037	23980	29542
PGK1	phosphoglycerate kinase 1	8	Cytoplasm	kinase			5230	18655	24644
PGS1	phosphatidylglycerophosphate synthase 1	24	Cytoplasm	enzyme			9489	74451	303698
PHLDB1	pleckstrin homology like domain family B member 1	3	Cytoplasm	other			23187	102693	171434
PI3K (complex)	--	6	Cytoplasm	complex		copanlisib
PI4KA	phosphatidylinositol 4-kinase alpha	4	Cytoplasm	kinase			5297	224020	64161
PIGA	phosphatidylinositol glycan anchor biosynthesis class A	15	Cytoplasm	enzyme			5277	18700	363464
PIK3R1	phosphoinositide-3-kinase regulatory subunit 1	19	Cytoplasm	kinase			5295	18708	25513
PIKFYVE	phosphoinositide kinase, FYVE-type zinc finger containing	25	Cytoplasm	kinase			200576	18711	316457
PITPNA	phosphatidylinositol transfer protein alpha		Cytoplasm	transporter	diagnosis		5306	18738	29525
Pka	--	10	Cytoplasm	complex		PKA inhibitor
Pkc(s)	--	10	Cytoplasm	group	efficacy	protein kinase C agonist, protein kinase C inhibitor, LXS196, L-threo-safingol
PLEC	plectin		Cytoplasm	other	unspecified application		5339	18810	64204
PLEKHG2	pleckstrin homology and RhoGEF domain containing G2		Cytoplasm	other			64857	101497	292750
PMM1	phosphomannomutase 1	17	Cytoplasm	enzyme			5372	29858	300089
PNPLA8	patatin like phospholipase domain containing 8		Cytoplasm	enzyme			50640	67452	314075
POLG	polymerase (DNA) gamma, catalytic subunit		Cytoplasm	enzyme	diagnosis	lamivudine/nelfinavir/stavudine, lamivudine/stavudine, lamivudine/nevirapine/stavudine, stavudine, vidarabine, zalcitabine	5428	18975	85472
POR	cytochrome p450 oxidoreductase		Cytoplasm	enzyme		daunorubicin/tretinoin, cisplatin/doxorubicin/methotrexate, cisplatin/doxorubicin/ifosfamide/methotrexate, cisplatin/doxorubicin, carboplatin/doxorubicin, dacarbazine/doxorubicin, doxorubicin/ifosfamide, doxorubicin/streptozocin, dacarbazine/doxorubicin/ifosfamide, doxorubicin/tretinoin, nitazoxanide/peginterferon alfa-2a/ribavirin, nitazoxanide, doxorubicin, daunorubicin	5447	18984	29441
PPIB	peptidylprolyl isomerase B	15	Cytoplasm	enzyme			5479	19035	64367
PPIC	peptidylprolyl isomerase C	12	Cytoplasm	enzyme			5480	19038	291463
PPP1CA	protein phosphatase 1 catalytic subunit alpha		Cytoplasm	phosphatase			5499	19045	24668
PPP1R14B	protein phosphatase 1 regulatory inhibitor subunit 14B		Cytoplasm	phosphatase			26472	18938	259225
PPP2CB	protein phosphatase 2 catalytic subunit beta	16	Cytoplasm	phosphatase			5516	19053	24673
PRDX2	peroxiredoxin 2		Cytoplasm	enzyme			7001	21672	29338
PRDX5	peroxiredoxin 5	25	Cytoplasm	enzyme	unspecified application	auranofin	25824	54683	113898
PREX1	phosphatidylinositol-3,4,5-trisphosphate dependent Rac exchange factor 1		Cytoplasm	other			57580	277360	311647
PRKAA	--	6	Cytoplasm	group
PRKAA2	protein kinase AMP-activated catalytic subunit alpha 2		Cytoplasm	kinase			5563	108079	78975
PRKAG3	protein kinase AMP-activated non-catalytic subunit gamma 3		Cytoplasm	other			53632	241113	301518
PRKAR1A	protein kinase cAMP-dependent type I regulatory subunit alpha	8	Cytoplasm	kinase			5573	19084	25725
PRKAR2A	protein kinase cAMP-dependent type II regulatory subunit alpha		Cytoplasm	kinase			5576	19087	29699
PRKCSH	protein kinase C substrate 80K-H		Cytoplasm	enzyme			5589	19089	300445
PRKG1	protein kinase, cGMP-dependent, type I		Cytoplasm	kinase			5592	19091	54286
PSAT1	phosphoserine aminotransferase 1	22	Cytoplasm	enzyme			29968	107272	293820
PSEN2	presenilin 2		Cytoplasm	peptidase	diagnosis	tarenflurbil	5664	19165	81751
PSMA1	proteasome subunit alpha 1	13	Cytoplasm	peptidase			5682	26440	29668
PSMA2	proteasome subunit alpha 2	21	Cytoplasm	peptidase	unspecified application		5683	19166	29669
PSMA3	proteasome subunit alpha 3		Cytoplasm	peptidase			5684	19167	29670
PSMA5	proteasome subunit alpha 5	23	Cytoplasm	peptidase			5686	26442	29672
PSMA6	proteasome subunit alpha 6	21,23	Cytoplasm	peptidase			5687	26443	29673
PSMA7	proteasome subunit alpha 7	21	Cytoplasm	peptidase			5688	26444	29674
PSMB4	proteasome subunit beta 4	21	Cytoplasm	peptidase			5692	19172	58854
PSMB5	proteasome subunit beta 5	2	Cytoplasm	peptidase		carfilzomib, bortezomib/cladribine/rituximab, ixazomib citrate, bortezomib/sorafenib, bortezomib/paclitaxel, bortezomib/melphalan, bortezomib/dexamethasone, bortezomib/dexamethasone/doxorubicin, bortezomib/dexamethasone/lenalidomide, bortezomib/dexamethasone/thalidomide, carfilzomib/dexamethasone/lenalidomide, bortezomib/prednisone, bortezomib/doxorubicin, bortezomib/vorinostat, bortezomib/thalid…	5693	19173	29425
PSMD1	proteasome 26S subunit, non-ATPase 1	8	Cytoplasm	other		bortezomib/cladribine/rituximab, bortezomib/sorafenib, bortezomib/paclitaxel, bortezomib/dexamethasone, bortezomib/dexamethasone/doxorubicin, bortezomib/dexamethasone/lenalidomide, bortezomib/dexamethasone/thalidomide, bortezomib/prednisone, bortezomib/doxorubicin, bortezomib/vorinostat, bortezomib/thalidomide, bortezomib/rituximab, bortezomib/dexamethasone/rituximab, bortezomib	5707	70247	83806
PSMD2	proteasome 26S subunit, non-ATPase 2	2	Cytoplasm	other		bortezomib/cladribine/rituximab, bortezomib/sorafenib, bortezomib/paclitaxel, bortezomib/dexamethasone, bortezomib/dexamethasone/doxorubicin, bortezomib/dexamethasone/lenalidomide, bortezomib/dexamethasone/thalidomide, bortezomib/prednisone, bortezomib/doxorubicin, bortezomib/vorinostat, bortezomib/thalidomide, bortezomib/rituximab, bortezomib/dexamethasone/rituximab, bortezomib	5708	21762	287984
PSMD4	proteasome 26S subunit, non-ATPase 4	10,22	Cytoplasm	other	diagnosis,disease progression		5710	19185	83499
PSMD12	proteasome 26S subunit, non-ATPase 12	14	Cytoplasm	other			5718	66997	287772
PSMD14	proteasome 26S subunit, non-ATPase 14	21	Cytoplasm	peptidase			10213	59029	311078
PTEN	phosphatase and tensin homolog	21	Cytoplasm	phosphatase	diagnosis,disease progression,efficacy,prognosis,response to therapy,unspecified application		5728	19211	50557
PTGES3	prostaglandin E synthase 3	16	Cytoplasm	enzyme			10728	56351|100043508	362809
PTGS2	prostaglandin-endoperoxide synthase 2	21,23	Cytoplasm	enzyme	diagnosis,disease progression,efficacy,prognosis,unspecified application	acetaminophen/pentazocine, acetaminophen/clemastine/pseudoephedrine, aspirin/butalbital/caffeine, acetaminophen/caffeine/dihydrocodeine, aspirin/hydrocodone, aspirin/oxycodone, acetaminophen/aspirin/caffeine, aspirin/pravastatin, acetaminophen/dexbrompheniramine/pseudoephedrine, aspirin/meprobamate, aspirin/caffeine/propoxyphene, aspirin/butalbital/caffeine/codeine, aspirin/caffeine/dihydrocodein…	5743	19225	29527
PTK2	protein tyrosine kinase 2		Cytoplasm	kinase	diagnosis,disease progression,efficacy,prognosis	CT-707	5747	14083	25614
PTP4A1	protein tyrosine phosphatase type IVA, member 1	8	Cytoplasm	phosphatase			7803	19243	29463
PTP4A2	protein tyrosine phosphatase type IVA, member 2	3	Cytoplasm	phosphatase			8073	19244	85237
PTPN1	protein tyrosine phosphatase, non-receptor type 1	19	Cytoplasm	phosphatase	prognosis	protein tyrosine phosphatase 1B inhibitor	5770	19246	24697
PTPN11	protein tyrosine phosphatase, non-receptor type 11	9	Cytoplasm	phosphatase			5781	19247	25622
Qars	glutaminyl-tRNA synthetase		Cytoplasm	enzyme				97541	290868
RAB14	RAB14, member RAS oncogene family	8	Cytoplasm	enzyme			51552	68365	94197
RAB34	RAB34, member RAS oncogene family	13	Cytoplasm	enzyme			83871	19376	360571
RABAC1	Rab acceptor 1	2	Cytoplasm	other			10567	14470	83583
Rac	--	5	Cytoplasm	group
RBM3	RNA binding motif (RNP1, RRM) protein 3		Cytoplasm	other			5935	100043257|19652	114488
Rbx1	ring-box 1		Cytoplasm	enzyme				56438	300084
RCN3	reticulocalbin 3	1	Cytoplasm	other			57333	52377	494125
RER1	retention in endoplasmic reticulum sorting receptor 1	2	Cytoplasm	other			11079	67830	298675
RGL1	ral guanine nucleotide dissociation stimulator like 1		Cytoplasm	other			23179	19731	289080
RHOA	ras homolog family member A	4	Cytoplasm	enzyme			387	11848	117273
RHOJ	ras homolog family member J		Cytoplasm	enzyme			57381	80837	299145
RICTOR	RPTOR independent companion of MTOR complex 2	11,14,18,19,21,23	Cytoplasm	other			253260	78757	310131
RNASET2	ribonuclease T2	13	Cytoplasm	enzyme			8635	68195|100037283	292306
Rock	--	4	Cytoplasm	group	efficacy	Rho kinase inhibitor
RPL4	ribosomal protein L4	21	Cytoplasm	enzyme			6124	67891	64302
RPL5	ribosomal protein L5	2	Cytoplasm	other			6125	100503670	81763
RPL10	ribosomal protein L10	14	Cytoplasm	other			6134	110954	81764
RPL11	ribosomal protein L11	2	Cytoplasm	other			6135	67025	362631
RPL14	ribosomal protein L14	18	Cytoplasm	other			9045	67115	65043
RPL15	ribosomal protein L15	18	Cytoplasm	other			6138	66480	245981
RPL17	ribosomal protein L17	17	Cytoplasm	other			6139	102632403|319195	291434
RPL18	ribosomal protein L18	23	Cytoplasm	other			6141	19899	81766
RPL19	ribosomal protein L19	18	Cytoplasm	other			6143	19921	81767
RPL23	ribosomal protein L23	11	Cytoplasm	other			9349	65019	29282
RPL24	ribosomal protein L24	12	Cytoplasm	other			6152	68193	64307
RPL26	ribosomal protein L26	12	Cytoplasm	other			6154	19941	287417
RPL27	ribosomal protein L27		Cytoplasm	other			6155	19942	64306
RPL28	ribosomal protein L28	18	Cytoplasm	other			6158	19943	64638
RPL30	ribosomal protein L30		Cytoplasm	other			6156	19946	64640|100362027
RPL31	ribosomal protein L31	16	Cytoplasm	other			6160	114641	64298
Rpl32	ribosomal protein L32		Cytoplasm	other				19951	28298
RPL35	ribosomal protein L35	18	Cytoplasm	other			11224	66489	296709
RPL36	ribosomal protein L36	18	Cytoplasm	other			25873	100043718	58927
RPL37	ribosomal protein L37		Cytoplasm	other			6167	67281	100360841|81770|100360781
RPL39	ribosomal protein L39		Cytoplasm	other			6170	67248	25347
RPL41	ribosomal protein L41		Cytoplasm	other			6171	67945	124440
RPL13A	ribosomal protein L13a	14	Cytoplasm	other			23521	22121	317646
RPL18A	ribosomal protein L18a		Cytoplasm	other			6142	76808	290641
RPL27A	ribosomal protein L27a		Cytoplasm	other			6157	26451	293418
Rpl29 (includes others)	ribosomal protein L29	14	Cytoplasm	other				383770|102634941|666642|102634483|19944|100503125|545683|670211	29283
Rpl34 (includes others)	ribosomal protein L34	11	Cytoplasm	other				100043876|68436|619547	362041
RPL36AL	ribosomal protein L36a like		Cytoplasm	other			6166	66483	81769
RPL37A	ribosomal protein L37a	12	Cytoplasm	other			6168	19981	100361520
Rpl38 (includes others)	ribosomal protein L38	20	Cytoplasm	other					690468|685963|689284
RPL7A	ribosomal protein L7a	1	Cytoplasm	other			6130	27176	296596
RPLP0	ribosomal protein lateral stalk subunit P0	1	Cytoplasm	other			6175	11837	64205
RPLP1	ribosomal protein lateral stalk subunit P1	24	Cytoplasm	other			6176		140661
RPN1	ribophorin I		Cytoplasm	enzyme			6184	103963	25596
RPN2	ribophorin II	13	Cytoplasm	enzyme			6185	20014	64701
RPS2	ribosomal protein S2	18	Cytoplasm	other			6187	16898	83789
RPS3	ribosomal protein S3	3	Cytoplasm	enzyme	unspecified application		6188	27050	140654
RPS5	ribosomal protein S5	11	Cytoplasm	other			6193	20103	25538
RPS6	ribosomal protein S6	4	Cytoplasm	other	efficacy,response to therapy		6194	20104	100911372|29304
RPS7	ribosomal protein S7	18	Cytoplasm	other			6201	20115	100362830|29258
RPS8	ribosomal protein S8	18	Cytoplasm	other			6202	20116	65136
RPS9	ribosomal protein S9	17	Cytoplasm	translation regulator			6203	76846	81772
RPS10	ribosomal protein S10	22	Cytoplasm	other			6204	67097	81773|100363439
RPS11	ribosomal protein S11	21	Cytoplasm	other			6205	27207	81774
RPS12	ribosomal protein S12		Cytoplasm	other			6206	20042	65139
RPS14	ribosomal protein S14	20	Cytoplasm	translation regulator			6208	20044	29284
RPS15	ribosomal protein S15	14	Cytoplasm	other			6209	20054	29285
RPS16	ribosomal protein S16	23	Cytoplasm	other			6217	20055	140655
RPS18	ribosomal protein S18	21	Cytoplasm	other			6222	20084	100360679|294282
RPS19	ribosomal protein S19	21	Cytoplasm	other			6223	20085	100910336|29287
RPS20	ribosomal protein S20	4	Cytoplasm	other			6224	67427	122772
RPS24	ribosomal protein S24	13	Cytoplasm	other	unspecified application		6229	20088	81776
RPS26	ribosomal protein S26	11	Cytoplasm	other			6231	27370	27139|100360508
RPS28	ribosomal protein S28		Cytoplasm	other			6234	54127	691531
RPS29	ribosomal protein S29	11	Cytoplasm	other			6235	20090	25348
RPS15A	ribosomal protein S15a		Cytoplasm	other			6210	267019	117053
RPS27A	ribosomal protein S27a	14	Cytoplasm	other			6233	78294	100912032
RPS27L	ribosomal protein S27 like	12	Cytoplasm	translation regulator			51065	67941	681429
Rps3a1	ribosomal protein S3A1	21	Cytoplasm	other				20091	29288
RPS4Y1	ribosomal protein S4, Y-linked 1	11	Cytoplasm	other	diagnosis,prognosis		6192	20102	100362640
RPS6KB1	ribosomal protein S6 kinase B1	4	Cytoplasm	kinase	diagnosis,efficacy,prognosis		6198	72508	83840
RPSA	ribosomal protein SA		Cytoplasm	translation regulator			3921	16785	29236
RPTOR	regulatory associated protein of MTOR complex 1	16,21	Cytoplasm	other			57521	74370	287871
Rrbp1	ribosome binding protein 1	15	Cytoplasm	transporter	unspecified application			81910	311483
Rsk	--	25	Cytoplasm	group
RTN1	reticulon 1		Cytoplasm	other			6252	104001	116644
RTN2	reticulon 2		Cytoplasm	other	unspecified application		6253	20167	308410
RTN3	reticulon 3		Cytoplasm	other			10313	20168	140945
RYR1	ryanodine receptor 1		Cytoplasm	ion channel		dantrolene	6261	20190	114207
S100A1	S100 calcium binding protein A1		Cytoplasm	other	diagnosis		6271	20193	295214
S100A6	S100 calcium binding protein A6	4	Cytoplasm	transporter	diagnosis,unspecified application		6277	20200	85247
S100A11	S100 calcium binding protein A11	9	Cytoplasm	other			6282	277089	445415
SAR1A	secretion associated Ras related GTPase 1A	24	Cytoplasm	enzyme			56681	20224	361842
SARS	seryl-tRNA synthetase		Cytoplasm	enzyme			6301	20226	266975
SCAMP3	secretory carrier membrane protein 3	9	Cytoplasm	transporter			10067	24045	65169
Scd2	stearoyl-Coenzyme A desaturase 2		Cytoplasm	enzyme				20250	83792
SCO2	SCO2 cytochrome c oxidase assembly protein		Cytoplasm	other			9997	100126824
SDF2L1	stromal cell derived factor 2 like 1	15	Cytoplasm	other			23753	64136	680945
SDHB	succinate dehydrogenase complex iron sulfur subunit B	21	Cytoplasm	enzyme			6390	67680	298596
SDHD	succinate dehydrogenase complex subunit D	21	Cytoplasm	enzyme		hexachlorophene	6392	66925	363061
SEC11A	SEC11 homolog A, signal peptidase complex subunit	15	Cytoplasm	peptidase			23478	56529	65166
SEC22B	SEC22 homolog B, vesicle trafficking protein (gene/pseudogene)	15	Cytoplasm	other			9554	20333	310710
SEC24C	SEC24 homolog C, COPII coat complex component	16	Cytoplasm	transporter			9632	218811	685144
SEC24D	SEC24 homolog D, COPII coat complex component	15	Cytoplasm	transporter			9871	69608	310843
SEC31A	SEC31 homolog A, COPII coat complex component	15	Cytoplasm	other			22872	69162	93646
SEC61A1	Sec61 translocon alpha 1 subunit	15	Cytoplasm	transporter			29927	53421	80843
SEC61B	Sec61 translocon beta subunit	12	Cytoplasm	transporter			10952	66212	298068
SEL1L	SEL1L ERAD E3 ligase adaptor subunit		Cytoplasm	other			6400	20338	314352
SELK	selenoprotein K		Cytoplasm	other			58515	80795	290549
SELM	selenoprotein M	15	Cytoplasm	other			140606	114679	498398
SERPINB6	serpin family B member 6	12	Cytoplasm	other			5269	20719	291085
SFXN3	sideroflexin 3		Cytoplasm	transporter			81855	94280	65042
SIDT2	SID1 transmembrane family member 2		Cytoplasm	other			51092	214597	315617
SLC25A3	solute carrier family 25 member 3	17	Cytoplasm	transporter			5250	18674	245959
SLC25A4	solute carrier family 25 member 4		Cytoplasm	transporter		clodronic acid	291	11739	85333
SLC6A8	solute carrier family 6 member 8		Cytoplasm	transporter			6535	102857	50690
Smad2/3	--	9	Cytoplasm	group
SMPD1	sphingomyelin phosphodiesterase 1	6	Cytoplasm	enzyme		acid sphingomyelinase inhibitor	6609	20597	308909
SMTNL1	smoothelin-like 1		Cytoplasm	other			219537	68678	311167
SMYD2	SET and MYND domain containing 2	22	Cytoplasm	enzyme			56950	226830	289372
SNX17	sorting nexin 17		Cytoplasm	transporter			9784	266781	298836
SOD1	superoxide dismutase 1, soluble	1	Cytoplasm	enzyme	unspecified application		6647	20655	24786
SORL1	sortilin-related receptor, L(DLR class) A repeats containing		Cytoplasm	transporter			6653	20660	300652
Sos	--	8	Cytoplasm	group
SPCS1	signal peptidase complex subunit 1		Cytoplasm	peptidase			28972	69019	290555
SPCS2	signal peptidase complex subunit 2	15	Cytoplasm	other			9789	66624	293142
SPG7	SPG7, paraplegin matrix AAA peptidase subunit		Cytoplasm	peptidase			6687	234847	353231
SPSB1	splA/ryanodine receptor domain and SOCS box containing 1	17	Cytoplasm	other			80176	74646	313722
SPTLC2	serine palmitoyltransferase long chain base subunit 2		Cytoplasm	enzyme			9517	20773	366697
SQLE	squalene epoxidase	24	Cytoplasm	enzyme		tolnaftate, terbinafine, butenafine, naftifine	6713	20775	29230
SRC (family)	--	5	Cytoplasm	group		dasatinib, saracatinib, ponatinib, ilorasertib, bosutinib, vandetanib
SRP14	signal recognition particle 14kDa		Cytoplasm	other			6727	20813	296076
SRP19	signal recognition particle 19kDa	15	Cytoplasm	other			6728	66384	291685
SRPRA	SRP receptor alpha subunit	15	Cytoplasm	other			6734	67398	315548
SSR1	signal sequence receptor, alpha	15	Cytoplasm	other			6745	107513	361233
SSR3	signal sequence receptor, gamma (translocon-associated protein gamma)	15	Cytoplasm	other			6747	67437	81784
SSR4	signal sequence receptor, delta	15	Cytoplasm	other			6748	20832	29435
ST3GAL6	ST3 beta-galactoside alpha-2,3-sialyltransferase 6	13	Cytoplasm	enzyme			10402	54613	304023
STAT5a/b	--	7	Cytoplasm	group	diagnosis,efficacy,prognosis
STRN4	striatin 4	16	Cytoplasm	other			29888	97387	308392
STX5	syntaxin 5	15	Cytoplasm	transporter			6811	56389	65134
SURF1	surfeit 1		Cytoplasm	enzyme			6834	20930	100912008|64463
SURF4	surfeit 4	15	Cytoplasm	other			6836	20932	619346
SYNGR2	synaptogyrin 2	13	Cytoplasm	other			9144	20973	89815
SYNRG	synergin, gamma	7	Cytoplasm	other			11276	217030	84479
SYVN1	synoviolin 1	1	Cytoplasm	transporter			84447	74126	361712
TAGLN	transgelin	9	Cytoplasm	other	diagnosis		6876	21345	25123
TAOK1	TAO kinase 1	8	Cytoplasm	kinase			57551	216965	286993
Tax1bp3	Tax1 binding protein 3	7	Cytoplasm	other					360564
TBCA	tubulin folding cofactor A		Cytoplasm	other			6902	21371	366995
TIAM1	T-cell lymphoma invasion and metastasis 1		Cytoplasm	other			7074	21844	304109
TIMM13	translocase of inner mitochondrial membrane 13		Cytoplasm	transporter			26517	30055	252928
TIMM21	translocase of inner mitochondrial membrane 21	25	Cytoplasm	other			29090	67105	307210
TIMM23	translocase of inner mitochondrial membrane 23	20	Cytoplasm	transporter			100287932	53600	54312|100362432
TIMM17A	translocase of inner mitochondrial membrane 17 homolog A (yeast)	13	Cytoplasm	transporter			10440	21854	54311
TK1	thymidine kinase 1	22	Cytoplasm	kinase	diagnosis,prognosis		7083	21877	24834
TKT	transketolase	16	Cytoplasm	enzyme			7086	21881	64524
TMBIM1	transmembrane BAX inhibitor motif containing 1		Cytoplasm	other			64114	69660	316516
TMED2	transmembrane p24 trafficking protein 2	23	Cytoplasm	transporter			10959	100862175|56334	65165
TMED9	transmembrane p24 trafficking protein 9	3	Cytoplasm	transporter			54732	67511	361207
TMED10	transmembrane p24 trafficking protein 10	2	Cytoplasm	transporter			10972	100042773|68581	84599
TMEM109	transmembrane protein 109	3	Cytoplasm	other			79073	68539	361732
TMEM132A	transmembrane protein 132A	1	Cytoplasm	other			54972	98170	338474
TMSB10/TMSB4X	thymosin beta 10		Cytoplasm	other	diagnosis		9168|7114	100042318	81814|50665
TNK2	tyrosine kinase non receptor 2		Cytoplasm	kinase		vemurafenib, osimertinib, cobimetinib/vemurafenib, dabrafenib/trametinib/vemurafenib	10188	51789	303882
Tpi1 (includes others)	triosephosphate isomerase 1		Cytoplasm	enzyme					500959|498731|24849
Tpm3	tropomyosin 3		Cytoplasm	other					117557
Tpm4	tropomyosin 4	8	Cytoplasm	other				326618	24852
TPT1	tumor protein, translationally-controlled 1	10	Cytoplasm	other			7178	22070	116646
TRAF7	TNF receptor associated factor 7	5	Cytoplasm	enzyme			84231	224619	360491
TRIM35	tripartite motif containing 35		Cytoplasm	other			23087	66854	498538
TRIM41	tripartite motif containing 41		Cytoplasm	other			90933	211007	303088
TRIM72	tripartite motif containing 72		Cytoplasm	enzyme			493829	434246	365377
TRPC4AP	transient receptor potential cation channel subfamily C member 4 associated protein		Cytoplasm	transporter			26133	56407	362247
TSC2	tuberous sclerosis 2		Cytoplasm	other			7249	22084	24855
TSPO	translocator protein	24	Cytoplasm	transmembrane receptor		CGS-8216, fluoxetine/olanzapine, estazolam, clorazepate, eszopiclone, temazepam, zolpidem, chlordiazepoxide, lorazepam, olanzapine, triazolam, flumazenil, clonazepam, flurazepam, midazolam, flunitrazepam, alprazolam, zaleplon, SSR180575, PK 11195	706	12257	24230
TTC38	tetratricopeptide repeat domain 38		Cytoplasm	other			55020	239570	300125
TUBA1A	tubulin alpha 1a	1	Cytoplasm	other	unspecified application	epothilone B, colchicine/probenecid, larotaxel, eribulin, davunetide, vintafolide, milataxel, cevipabulin, gemcitabine/paclitaxel, docetaxel/prednisone, capecitabine/docetaxel, paclitaxel/trastuzumab, cyclophosphamide/prednisone/vincristine, docetaxel/hydrocortisone, cyclophosphamide/docetaxel, gemcitabine/vinorelbine, cyclophosphamide/daunorubicin/imatinib/prednisone/vincristine, cyclophosphamid…	7846	22142	64158
TUBA1C	tubulin alpha 1c	7	Cytoplasm	other		epothilone B, colchicine/probenecid, larotaxel, eribulin, davunetide, vintafolide, milataxel, cevipabulin, gemcitabine/paclitaxel, docetaxel/prednisone, capecitabine/docetaxel, paclitaxel/trastuzumab, cyclophosphamide/prednisone/vincristine, docetaxel/hydrocortisone, cyclophosphamide/docetaxel, gemcitabine/vinorelbine, cyclophosphamide/daunorubicin/imatinib/prednisone/vincristine, cyclophosphamid…	84790	22146	300218|100909441
TUBA4A	tubulin alpha 4a		Cytoplasm	other		epothilone B, colchicine/probenecid, larotaxel, eribulin, davunetide, vintafolide, milataxel, cevipabulin, cabazitaxel, gemcitabine/paclitaxel, docetaxel/prednisone, capecitabine/docetaxel, paclitaxel/trastuzumab, cabazitaxel/prednisone, cyclophosphamide/prednisone/vincristine, docetaxel/hydrocortisone, cyclophosphamide/docetaxel, gemcitabine/vinorelbine, cyclophosphamide/daunorubicin/imatinib/pr…	7277	22145	316531
TUBB	tubulin beta class I	1	Cytoplasm	other	efficacy	ixabepilone	203068	22154	29214
TUBB1	tubulin beta 1 class VI		Cytoplasm	other		epothilone B, colchicine/probenecid, larotaxel, ABT-751, eribulin, simotaxel, davunetide, vintafolide, milataxel, cevipabulin, cabazitaxel, gemcitabine/paclitaxel, vindesine, bortezomib/paclitaxel, docetaxel/prednisone, capecitabine/docetaxel, paclitaxel/trastuzumab, cabazitaxel/prednisone, cyclophosphamide/prednisone/vincristine, docetaxel/hydrocortisone, cyclophosphamide/docetaxel, gemcitabine/…	81027	545486	679312
TUBB2A	tubulin beta 2A class IIa	7	Cytoplasm	other		epothilone B, colchicine/probenecid, larotaxel, ABT-751, eribulin, simotaxel, davunetide, vintafolide, milataxel, cevipabulin, gemcitabine/paclitaxel, docetaxel/prednisone, capecitabine/docetaxel, paclitaxel/trastuzumab, cyclophosphamide/prednisone/vincristine, docetaxel/hydrocortisone, cyclophosphamide/docetaxel, gemcitabine/vinorelbine, cyclophosphamide/daunorubicin/imatinib/prednisone/vincrist…	7280	22151	498736
TXN	thioredoxin	1	Cytoplasm	enzyme	efficacy,unspecified application	PX-12	7295	22166	116484
TXN2	thioredoxin 2	1	Cytoplasm	enzyme			25828	56551	79462
UBA1	ubiquitin like modifier activating enzyme 1	12	Cytoplasm	enzyme			7317	22201	314432
Uba52	ubiquitin A-52 residue ribosomal protein fusion product 1	25	Cytoplasm	other				22186	64156
Ubb	ubiquitin B	24	Cytoplasm	other				22187	192255
UBC	ubiquitin C	22	Cytoplasm	enzyme			7316	22190	50522
UBE2B	ubiquitin conjugating enzyme E2 B		Cytoplasm	enzyme			7320	22210	81816
UBE2J2	ubiquitin conjugating enzyme E2 J2		Cytoplasm	enzyme			118424	140499	298689
Ubiquitin	--	1	Cytoplasm	group
UBXN1	UBX domain protein 1	23	Cytoplasm	other			51035	225896	293719
UCHL5	ubiquitin C-terminal hydrolase L5	22	Cytoplasm	peptidase		VLX1570	51377	56207	360853
UCP1	uncoupling protein 1	22	Cytoplasm	transporter	efficacy,unspecified application		7350	22227	24860
UGGT1	UDP-glucose glycoprotein glucosyltransferase 1	17	Cytoplasm	enzyme			56886	320011	171129
UQCR11	ubiquinol-cytochrome c reductase, complex III subunit XI	22	Cytoplasm	enzyme			10975	66594	690848
UQCRC2	ubiquinol-cytochrome c reductase core protein II	21	Cytoplasm	enzyme			7385	67003	293448
UQCRHL	ubiquinol-cytochrome c reductase hinge protein like	24	Cytoplasm	other			440567	66576	366448
UQCRQ	ubiquinol-cytochrome c reductase complex III subunit VII	11	Cytoplasm	enzyme			27089	22272	497902
USE1	unconventional SNARE in the ER 1		Cytoplasm	other			55850	67023	290627
USO1	USO1 vesicle transport factor	15	Cytoplasm	transporter			8615	56041	56042
USP14	ubiquitin specific peptidase 14	10	Cytoplasm	peptidase		VLX1570	9097	59025	291796
VCP	valosin containing protein	7	Cytoplasm	enzyme		CB-5083	7415	269523	116643
VDAC1	voltage dependent anion channel 1	5	Cytoplasm	ion channel			7416	22333	83529
VDAC3	voltage dependent anion channel 3	5	Cytoplasm	ion channel			7419	22335	83532
VIM	vimentin	6	Cytoplasm	other	diagnosis,efficacy,prognosis,unspecified application		7431	22352	81818
VPS28	VPS28, ESCRT-I subunit		Cytoplasm	transporter			51160	66914	300052
WBP1	WW domain binding protein 1		Cytoplasm	other			23559	22377	297381
WDR34	WD repeat domain 34	5	Cytoplasm	other			89891	71820	296618
WWC1	WW and C2 domain containing 1		Cytoplasm	transcription regulator			23286	211652	303039
WWOX	WW domain containing oxidoreductase		Cytoplasm	enzyme			51741	80707	292041
XDH	xanthine dehydrogenase		Cytoplasm	enzyme	unspecified application	allopurinol, oxypurinol, febuxostat, xanthine oxidase inhibitor, allopurinol/colchicine	7498	22436	497811
XPNPEP1	X-prolyl aminopeptidase (aminopeptidase P) 1, soluble	12	Cytoplasm	peptidase			7511	170750	170751
YBX2	Y-box binding protein 2	25	Cytoplasm	translation regulator			51087	53422	303250
YIF1B	Yip1 interacting factor homolog B, membrane trafficking protein	13	Cytoplasm	other			90522	77254	292768
YWHAE	tyrosine 3-monooxygenase/tryptophan 5-monooxygenase activation protein epsilon	7	Cytoplasm	other	diagnosis		7531	22627	29753
YWHAG	tyrosine 3-monooxygenase/tryptophan 5-monooxygenase activation protein gamma	17	Cytoplasm	other	unspecified application		7532	22628	56010
YWHAH	tyrosine 3-monooxygenase/tryptophan 5-monooxygenase activation protein eta	7,17	Cytoplasm	transcription regulator	unspecified application		7533	22629	25576
YWHAQ	tyrosine 3-monooxygenase/tryptophan 5-monooxygenase activation protein theta	7,17	Cytoplasm	other			10971	102634437|22630	25577
ZDHHC7	zinc finger DHHC-type containing 7		Cytoplasm	enzyme			55625	102193	170906
ALB	albumin		Extracellular Space	transporter	diagnosis,efficacy,prognosis,safety,unspecified application	aldoxorubicin	213	11657	24186
ANGPTL4	angiopoietin like 4	24	Extracellular Space	other			51129	57875	362850
APOA1	apolipoprotein A-I	12,17	Extracellular Space	transporter	diagnosis,efficacy,unspecified application		335	11806	25081
APOE	apolipoprotein E		Extracellular Space	transporter	diagnosis,efficacy,prognosis,unspecified application		348	11816	25728
BMP1	bone morphogenetic protein 1		Extracellular Space	peptidase	efficacy		649	12153	83470
BMP2	bone morphogenetic protein 2		Extracellular Space	growth factor			650	12156	29373
CGA	glycoprotein hormones, alpha polypeptide		Extracellular Space	other			1081	12640	116700
COL1A1	collagen type I alpha 1	6	Extracellular Space	other	diagnosis	collagenase clostridium histolyticum	1277	12842	29393
COL1A2	collagen type I alpha 2	6	Extracellular Space	other		collagenase clostridium histolyticum	1278	12843	84352
COL3A1	collagen type III alpha 1	10	Extracellular Space	other	diagnosis,efficacy	collagenase clostridium histolyticum	1281	12825	84032
COL4A3	collagen type IV alpha 3		Extracellular Space	other	efficacy,unspecified application	collagenase clostridium histolyticum	1285	12828	363265
COL5A1	collagen type V alpha 1	6	Extracellular Space	other		collagenase clostridium histolyticum	1289	12831	85490
Collagen(s)	--	6	Extracellular Space	complex
CSF1	colony stimulating factor 1	7	Extracellular Space	cytokine	diagnosis,disease progression,efficacy,prognosis,unspecified application		1435	12977	78965
CTGF	connective tissue growth factor	6	Extracellular Space	growth factor		FG-3019	1490	14219	64032
CYR61	cysteine rich angiogenic inducer 61	9	Extracellular Space	other	unspecified application		3491	16007	83476
EFEMP2	EGF containing fibulin-like extracellular matrix protein 2		Extracellular Space	other			30008	58859	293677
FBLN2	fibulin 2	6	Extracellular Space	other			2199	14115	282583
FBN1	fibrillin 1		Extracellular Space	other			2200	14118	83727
FGB	fibrinogen beta chain	17	Extracellular Space	other	unspecified application	F2	2244	110135	24366
FGF1	fibroblast growth factor 1		Extracellular Space	growth factor	prognosis	pentosan polysulfate	2246	14164	25317
FGF2	fibroblast growth factor 2		Extracellular Space	growth factor	diagnosis,efficacy,prognosis	pentosan polysulfate, suradista, sucralfate	2247	14173	54250
FGF18	fibroblast growth factor 18		Extracellular Space	growth factor			8817	14172	29369
FGG	fibrinogen gamma chain	24	Extracellular Space	other		F2	2266	99571	24367
FSTL1	follistatin like 1	9	Extracellular Space	other			11167	14314	79210
GH1	growth hormone 1	24	Extracellular Space	growth factor	efficacy,safety		2688
GPI	glucose-6-phosphate isomerase		Extracellular Space	enzyme	unspecified application		2821	14751	292804
GSN	gelsolin	3	Extracellular Space	other	disease progression,efficacy		2934	227753	296654
Hspg2	heparan sulfate proteoglycan 2		Extracellular Space	other					313641
IFN Beta	--	5	Extracellular Space	group
IFT27	intraflagellar transport 27		Extracellular Space	enzyme			11020	67042	300062
IFT140	intraflagellar transport 140	17	Extracellular Space	other			9742	106633	100362124
IgG	--	7	Extracellular Space	complex	efficacy,prognosis
Igm	--	7	Extracellular Space	complex	efficacy
IK	IK cytokine, down-regulator of HLA II	6	Extracellular Space	cytokine			3550	24010	291659
IL3	interleukin 3		Extracellular Space	cytokine			3562
IL5	interleukin 5		Extracellular Space	cytokine	diagnosis,efficacy,response to therapy	mepolizumab, reslizumab	3567	16191	24497
IL13	interleukin 13		Extracellular Space	cytokine	diagnosis,efficacy,response to therapy,unspecified application	CAT-354	3596	16163	116553
IL18	interleukin 18	20	Extracellular Space	cytokine	efficacy,unspecified application		3606	16173	29197
IL12 (complex)	--	6	Extracellular Space	complex	diagnosis,efficacy,prognosis
IL1B	interleukin 1 beta	20	Extracellular Space	cytokine	diagnosis,efficacy,prognosis	canakinumab, gevokizumab, canakinumab/INS, gallium nitrate	3553	16176	24494
INHA	inhibin alpha	20	Extracellular Space	growth factor	efficacy		3623	16322	24504
INHBA	inhibin beta A		Extracellular Space	growth factor	diagnosis		3624	16323	29200
INS	insulin	25	Extracellular Space	other	diagnosis,disease progression,efficacy,prognosis,safety,unspecified application		3630	16334	24506
LEP	leptin		Extracellular Space	growth factor	diagnosis,efficacy,prognosis,safety,unspecified application		3952	16846	25608
LGALS1	lectin, galactoside binding soluble 1		Extracellular Space	other	diagnosis,prognosis	OTX008	3956	16852	56646
LGALS7/LGALS7B	lectin, galactoside binding soluble 7		Extracellular Space	other	disease progression		3963|653499	16858	29518
LOXL1	lysyl oxidase like 1		Extracellular Space	enzyme	unspecified application		4016	16949	315714
MFGE8	milk fat globule-EGF factor 8 protein	4	Extracellular Space	other			4240	17304	25277
MIF	macrophage migration inhibitory factor (glycosylation-inhibiting factor)	2	Extracellular Space	cytokine	diagnosis,prognosis,response to therapy		4282	17319	81683
MSTN	myostatin		Extracellular Space	growth factor		stamulumab	2660	17700	29152
NENF	neudesin neurotrophic factor		Extracellular Space	growth factor			29937	66208	289380
NID1	nidogen 1		Extracellular Space	other			4811	18073	25494
OSM	oncostatin M		Extracellular Space	cytokine	unspecified application		5008	18413	289747
PCOLCE	procollagen C-endopeptidase enhancer		Extracellular Space	other			5118	18542	29569
PDGF BB	--	10	Extracellular Space	complex	efficacy,unspecified application
PDGFB	platelet derived growth factor subunit B		Extracellular Space	growth factor	disease progression		5155	18591	24628
PDGFC	platelet derived growth factor C		Extracellular Space	growth factor			56034	54635	79429
PLA2G5	phospholipase A2 group V		Extracellular Space	enzyme		varespladib methyl, varespladib	5322	18784	29354
PLG	plasminogen		Extracellular Space	peptidase	diagnosis,unspecified application	tenecteplase, PLAT, tranexamic acid, aprotinin, 6-aminocaproic acid, reteplase	5340	18815	85253
PRL	prolactin		Extracellular Space	cytokine	diagnosis,efficacy,safety		5617	19109	24683
PRPSAP1	phosphoribosyl pyrophosphate synthetase-associated protein 1	12	Extracellular Space	other			5635	67763	64390
PXDN	peroxidasin		Extracellular Space	enzyme			7837	69675	554172
Ren2	renin 2 tandem duplication of Ren1		Extracellular Space	peptidase				19702
RETNLB	resistin like beta		Extracellular Space	other			84666	57263	498074
SERPINA3	serpin family A member 3		Extracellular Space	other	unspecified application		12	16625|20717|20714|20716	24795
SERPINE1	serpin family E member 1	6	Extracellular Space	other	diagnosis,disease progression,efficacy,prognosis,safety	drotrecogin alfa	5054	18787	24617
SERPINH1	serpin family H member 1	5	Extracellular Space	other			871	12406	29345
Tgf beta	--	9	Extracellular Space	group	diagnosis,efficacy,prognosis,response to therapy,safety
TGFB1	transforming growth factor beta 1		Extracellular Space	growth factor	diagnosis,efficacy,prognosis,safety,unspecified application	dalantercept	7040	21803	59086
THBS4	thrombospondin 4		Extracellular Space	other	diagnosis		7060	21828	29220
TIMP1	TIMP metallopeptidase inhibitor 1	2	Extracellular Space	cytokine	diagnosis,disease progression,efficacy,prognosis,unspecified application		7076	21857	116510
TIMP2	TIMP metallopeptidase inhibitor 2	2	Extracellular Space	other	efficacy,unspecified application		7077	21858	29543
TIMP3	TIMP metallopeptidase inhibitor 3	2	Extracellular Space	other	diagnosis,prognosis,unspecified application		7078	21859	25358
TNF	tumor necrosis factor	20,23	Extracellular Space	cytokine	diagnosis,disease progression,efficacy,prognosis,response to therapy,safety,unspecified application	adalimumab, etanercept, infliximab, certolizumab, golimumab, infliximab/methotrexate, dexamethasone/thalidomide, dexamethasone/pomalidomide, cyclophosphamide/dexamethasone/thalidomide, golimumab/methotrexate, bortezomib/dexamethasone/thalidomide, rituximab/thalidomide, bortezomib/thalidomide, prednisone/thalidomide, adalimumab/methotrexate, pomalidomide, thalidomide	7124	21926	24835
TRIP6	thyroid hormone receptor interactor 6	5	Extracellular Space	cytokine			7205	22051	686323
Vegf	--	6	Extracellular Space	group	diagnosis,disease progression,efficacy,prognosis,response to therapy,unspecified application	MP0250
VEGFA	vascular endothelial growth factor A	20	Extracellular Space	growth factor	diagnosis,efficacy,prognosis,safety,unspecified application	dalteparin, bevacizumab, ranibizumab, aflibercept, bevacizumab/erlotinib, bevacizumab/sorafenib, bevacizumab/5-fluorouracil, bevacizumab/temozolomide, bevacizumab/irinotecan, bevacizumab/carmustine/lomustine, bevacizumab/paclitaxel, bevacizumab/irinotecan/oxaliplatin, aflibercept/irinotecan, bevacizumab/capecitabine/oxaliplatin, bevacizumab/panitumumab, bevacizumab/cetuximab, bevacizumab/pemetrex…	7422	22339	83785
WDR1	WD repeat domain 1		Extracellular Space	other			9948	22388	360950
WNT3A	Wnt family member 3A		Extracellular Space	cytokine			89780	22416	303181
AEBP1	AE binding protein 1	6	Nucleus	peptidase			165	11568	305494
AEN	apoptosis enhancing nuclease		Nucleus	enzyme			64782	68048	361594
AES	amino-terminal enhancer of split	8	Nucleus	transcription regulator			166	14797	29466
AHNAK	AHNAK nucleoprotein		Nucleus	other			79026	66395	191572
AIF1	allograft inflammatory factor 1		Nucleus	other			199	11629	29427
ALKBH5	alkB homolog 5, RNA demethylase		Nucleus	enzyme			54890	268420	303193
ANAPC4	anaphase promoting complex subunit 4	25	Nucleus	enzyme			29945	52206	305420
ANAPC5	anaphase promoting complex subunit 5	1	Nucleus	other			51433	59008	288671
ANAPC13	anaphase promoting complex subunit 13		Nucleus	other	disease progression		25847	69010	685029
Anp32b	acidic (leucine-rich) nuclear phosphoprotein 32 family, member B		Nucleus	other				67628	170724
Ap1	--	10	Nucleus	complex
ATF4	activating transcription factor 4		Nucleus	transcription regulator			468	11911	79255
ATF5	activating transcription factor 5	1	Nucleus	transcription regulator			22809	107503	282840
ATM	ATM serine/threonine kinase		Nucleus	kinase	diagnosis	AZD0156	472	11920	300711
ATXN3	ataxin 3	21	Nucleus	peptidase			4287	110616	60331
ATXN2L	ataxin 2 like	25	Nucleus	other			11273	233871	361649
AURKA	aurora kinase A	13	Nucleus	kinase	efficacy	tozasertib, MLN8054, AT-9283, danusertib, TTP607, AMG 900, ilorasertib, TAS-119	6790	20878	261730
AURKAIP1	aurora kinase A interacting protein 1	13	Nucleus	enzyme			54998	66077	298687
BARD1	BRCA1 associated RING domain 1	23	Nucleus	transcription regulator			580	12021	64557
BARX2	BARX homeobox 2		Nucleus	transcription regulator			8538	12023	679701
BCLAF1	BCL2 associated transcription factor 1	23	Nucleus	transcription regulator			9774	72567	293017
BPTF	bromodomain PHD finger transcription factor	16	Nucleus	transcription regulator			2186	207165	303617
BRCA1	breast cancer 1	23	Nucleus	transcription regulator	diagnosis,efficacy,response to therapy		672	12189	497672
BRD2	bromodomain containing 2		Nucleus	kinase			6046	14312	294276|100909544
BTF3	basic transcription factor 3		Nucleus	transcription regulator			689	218490	294680
BTG3	BTG family member 3	5	Nucleus	other			10950	12228	54230
C14orf166	chromosome 14 open reading frame 166	13	Nucleus	other			51637	68045	302247
Calm1 (includes others)	calmodulin 1	22	Nucleus	other				12315|12313|12314	24244|24242|50663
CARM1	coactivator associated arginine methyltransferase 1	23	Nucleus	transcription regulator			10498	59035	363026
CBL	Cbl proto-oncogene	13	Nucleus	transcription regulator			867	12402	500985
CCND1	cyclin D1	23	Nucleus	transcription regulator	diagnosis,efficacy,prognosis,response to therapy,unspecified application	arsenic trioxide/tretinoin, arsenic trioxide/daunorubicin/tretinoin, arsenic trioxide/gemtuzumab ozogamicin/tretinoin, arsenic trioxide/idarubicin/tretinoin, arsenic trioxide	595	12443	58919
CCND2	cyclin D2	8	Nucleus	other	diagnosis,efficacy		894	12444	64033
CCNT1	cyclin T1	24	Nucleus	transcription regulator			904	12455	315291
CDC16	cell division cycle 16	25	Nucleus	other			8881	69957	290875
CDC34	cell division cycle 34	23	Nucleus	enzyme			997	216150	299602
Cdk	--		Nucleus	group		roscovitine, cyclin-dependent protein kinase inhibitor
CDK4	cyclin-dependent kinase 4	2	Nucleus	kinase	diagnosis	palbociclib, cyclin dependent kinase 4 inhibitor, milciclib, ribociclib, abemaciclib, letrozole/palbociclib, roniciclib, FLX925, fulvestrant/palbociclib, G1T28, alvocidib	1019	12567	94201
CDK2AP1	cyclin-dependent kinase 2 associated protein 1	8	Nucleus	other			8099	13445	360804
Celf1	CUGBP, Elav-like family member 1		Nucleus	other				13046	362160
CFL1	cofilin 1	10	Nucleus	other			1072	12631	29271
CHD3	chromodomain helicase DNA binding protein 3		Nucleus	enzyme			1107	216848	303241
CHD4	chromodomain helicase DNA binding protein 4		Nucleus	enzyme			1108	107932	117535
CHEK1	checkpoint kinase 1	23	Nucleus	kinase	efficacy	cdc25C phosphatase (211-221), LY2606368, GDC-0575, UCN-01	1111	12649	140583
CIB1	calcium and integrin binding 1		Nucleus	other			10519	23991	81823
CLIC1	chloride intracellular channel 1	18	Nucleus	ion channel			1192	114584	406864
CLOCK	clock circadian regulator	24	Nucleus	transcription regulator			9575	12753	60447
COMMD1	copper metabolism domain containing 1		Nucleus	transporter			150684	17846	289831
COPS5	COP9 signalosome subunit 5	2	Nucleus	transcription regulator			10987	26754	312916
COPS6	COP9 signalosome subunit 6	2	Nucleus	other			10980	26893	304343
Creb	--	4	Nucleus	group
CREB5	cAMP responsive element binding protein 5		Nucleus	transcription regulator			9586	231991	500131
CREB3L1	cAMP responsive element binding protein 3-like 1		Nucleus	transcription regulator	unspecified application		90993	26427	362165
CSRP1	cysteine and glycine rich protein 1		Nucleus	other			1465	13007	29276
CTBP1	C-terminal binding protein 1		Nucleus	enzyme			1487	13016	29382
CTNNB1	catenin beta 1	20	Nucleus	transcription regulator	diagnosis,disease progression,efficacy,prognosis	PRI-724	1499	12387	84353
CTNND1	catenin delta 1	8	Nucleus	other			1500	12388	311163
CTPS1	CTP synthase 1		Nucleus	enzyme		cytidine triphosphate synthetase inhibitor	1503	51797	313560
CUL2	cullin 2	17	Nucleus	enzyme			8453	71745	361258
CUL5	cullin 5	17	Nucleus	ion channel			8065	75717	64624
CUL4A	cullin 4A	17	Nucleus	other			8451	99375	361181
CUL4B	cullin 4B		Nucleus	other			8450	72584	302502
DACH1	dachshund family transcription factor 1		Nucleus	transcription regulator			1602	13134	306096
DAXX	death-domain associated protein	16	Nucleus	transcription regulator			1616	13163	140926
DBP	D-box binding PAR bZIP transcription factor	24	Nucleus	transcription regulator			1628	13170	24309
DCTN3	dynactin subunit 3		Nucleus	other			11258	53598	362504
DDB1	damage specific DNA binding protein 1	17	Nucleus	other			1642	13194	64470
DDX6	DEAD-box helicase 6	25	Nucleus	enzyme			1656	13209	500988
DDX24	DEAD-box helicase 24		Nucleus	enzyme			57062	27225	373065
DGCR8	DGCR8 microprocessor complex subunit		Nucleus	enzyme			54487	94223	287954
DHX9	DEAH-box helicase 9	25	Nucleus	enzyme			1660	13211	304859
DMWD	dystrophia myotonica, WD repeat containing		Nucleus	other			1762	13401	680252
DNAJA1	DnaJ heat shock protein family (Hsp40) member A1	1	Nucleus	other			3301	15502	65028
DNAJB1	DnaJ heat shock protein family (Hsp40) member B1	7	Nucleus	other			3337	81489	361384
DNAJB9	DnaJ heat shock protein family (Hsp40) member B9	15	Nucleus	other			4189	27362	24908
DRAP1	DR1 associated protein 1	1	Nucleus	transcription regulator			10589	66556	293674
E2f	--	2	Nucleus	group
E2F1	E2F transcription factor 1	12,22	Nucleus	transcription regulator	disease progression,prognosis		1869	13555	399489
E2F4	E2F transcription factor 4	12	Nucleus	transcription regulator			1874	104394	100360427
EDF1	endothelial differentiation related factor 1		Nucleus	transcription regulator			8721	59022	296570
EHD2	EH domain containing 2	17	Nucleus	other			30846	259300	361512
EHMT2	euchromatic histone-lysine N-methyltransferase 2	9	Nucleus	transcription regulator			10919	110147	361798
ELK1	ELK1, ETS transcription factor	9	Nucleus	transcription regulator			2002	13712	314436
EN1	engrailed homeobox 1	16	Nucleus	transcription regulator			2019	13798	685360
EN2	engrailed homeobox 2	16	Nucleus	transcription regulator			2020	13799	499964
ERG	v-ets avian erythroblastosis virus E26 oncogene homolog		Nucleus	transcription regulator	prognosis,unspecified application		2078	13876	170909
ERH	enhancer of rudimentary homolog (Drosophila)		Nucleus	other			2079	13877	681415
ESRP1	epithelial splicing regulatory protein 1		Nucleus	other			54845	207920	500409
ESRRA	estrogen related receptor alpha		Nucleus	ligand-dependent nuclear receptor	diagnosis		2101
Esrra	estrogen related receptor, alpha	21	Nucleus	transcription regulator				26379	293701
Ewsr1	Ewing sarcoma breakpoint region 1		Nucleus	other	unspecified application			14030	100912481
FLI1	Fli-1 proto-oncogene, ETS transcription factor		Nucleus	transcription regulator			2313	14247	315532
FOXD2	forkhead box D2		Nucleus	transcription regulator			2306	17301	313504
FOXO1	forkhead box O1	14,19	Nucleus	transcription regulator			2308	56458	84482
Fus	fused in sarcoma	13	Nucleus	transcription regulator				233908	317385
GADD45G	growth arrest and DNA damage inducible gamma	7	Nucleus	other	efficacy		10912	23882	291005
GLIS2	GLIS family zinc finger 2		Nucleus	transcription regulator			84662	83396	302946
GPS1	G protein pathway suppressor 1	2	Nucleus	other			2873	209318	117039
GTF2B	general transcription factor IIB		Nucleus	transcription regulator			2959	229906	81673
GTF2F1	general transcription factor IIF subunit 1		Nucleus	transcription regulator			2962	98053	316123
GTF2I	general transcription factor IIi		Nucleus	transcription regulator			2969	14886	353256
H3F3A/H3F3B	H3 histone, family 3A		Nucleus	other	diagnosis		3020|3021	15078|15081	117056|100361558
HDAC1	histone deacetylase 1	9	Nucleus	transcription regulator	efficacy	tributyrin, belinostat, pyroxamide, mocetinostat, HDAC class I inhibitors, bortezomib/vorinostat, 4SC-202, vorinostat, romidepsin	3065	433759	297893
HDAC2	histone deacetylase 2	20	Nucleus	transcription regulator		tributyrin, belinostat, pyroxamide, histone deacetylase class II inhibitors, bortezomib/vorinostat, chidamide, 4SC-202, vorinostat, romidepsin, theophylline	3066	15182	84577
HDLBP	high density lipoprotein binding protein	18	Nucleus	transporter			3069	110611	64474
HIF1A	hypoxia inducible factor 1 alpha subunit		Nucleus	transcription regulator	diagnosis,efficacy,prognosis,response to therapy		3091	15251	29560
Hist1h1a	histone cluster 1, H1a	18	Nucleus	other				80838	291145
HIST1H1T	histone cluster 1, H1t	18	Nucleus	other			3010	107970	24438
Histone h3	--	9	Nucleus	group	efficacy
Histone h4	--	9	Nucleus	group	efficacy
HMG20B	high mobility group 20B		Nucleus	transcription regulator			10362	15353	362825
HMGA1	high mobility group AT-hook 1	10	Nucleus	transcription regulator	unspecified application		3159	111241|15361	117062
HMGN1	high mobility group nucleosome binding domain 1	8	Nucleus	transcription regulator	unspecified application		3150	15312	360704|100911295
HNRNPA1	heterogeneous nuclear ribonucleoprotein A1	20	Nucleus	other			3178		29578
HNRNPA2B1	heterogeneous nuclear ribonucleoprotein A2/B1	2	Nucleus	other			3181	53379	362361
HNRNPC	heterogeneous nuclear ribonucleoprotein C (C1/C2)		Nucleus	other			3183	15381	290046
HNRNPF	heterogeneous nuclear ribonucleoprotein F		Nucleus	other			3185	98758	64200
Hnrnph1	heterogeneous nuclear ribonucleoprotein H1		Nucleus	other					140931
HNRNPK	heterogeneous nuclear ribonucleoprotein K	25	Nucleus	transcription regulator	prognosis		3190	15387	117282
HNRNPM	heterogeneous nuclear ribonucleoprotein M	18	Nucleus	other			4670	76936	116655
HNRNPU	heterogeneous nuclear ribonucleoprotein U (scaffold attachment factor A)		Nucleus	transporter	unspecified application		3192	51810	117280
HOXD10	homeobox D10		Nucleus	transcription regulator			3236	15430	303991
HP1BP3	heterochromatin protein 1 binding protein 3		Nucleus	other			50809	15441	313647
HPF1	histone PARylation factor 1	5	Nucleus	other			54969	72612	290706
HSF1	heat shock transcription factor 1		Nucleus	transcription regulator			3297	15499	79245
ING1	inhibitor of growth family member 1	16	Nucleus	transcription regulator			3621	26356	306626
IPMK	inositol polyphosphate multikinase		Nucleus	kinase			253430	69718	171458
JUN	jun proto-oncogene	2	Nucleus	transcription regulator	prognosis		3725	16476	24516
JUND	jun D proto-oncogene	2	Nucleus	transcription regulator			3727	16478	24518
KANK2	KN motif and ankyrin repeat domains 2	13	Nucleus	transcription regulator			25959	235041	100361376
KDM5B	lysine demethylase 5B	13	Nucleus	transcription regulator			10765	75605	304809
KLF5	Kruppel-like factor 5 (intestinal)	20	Nucleus	transcription regulator			688	12224	84410
KLF6	Kruppel-like factor 6	6	Nucleus	transcription regulator			1316	23849	58954
LEMD2	LEM domain containing 2	4	Nucleus	other			221496	224640	361807
LITAF	lipopolysaccharide induced TNF factor	7	Nucleus	transcription regulator			9516	56722	65161
LMNA	lamin A/C	7	Nucleus	other			4000	16905	60374
LSM1	LSM1 homolog, mRNA degradation associated	25	Nucleus	other			27257	67207	364624
LSM2	LSM2 homolog, U6 small nuclear RNA and mRNA degradation associated	25	Nucleus	other			57819	27756	684148
LSM3	LSM3 homolog, U6 small nuclear RNA and mRNA degradation associated	25	Nucleus	other			27258	67678	297455
LSM4	LSM4 homolog, U6 small nuclear RNA and mRNA degradation associated	25	Nucleus	other			25804	50783	290647
LSM7	LSM7 homolog, U6 small nuclear RNA and mRNA degradation associated	25	Nucleus	other			51690	66094	362829
LSM8	LSM8 homolog, U6 small nuclear RNA associated	25	Nucleus	other			51691	76522	296913
LUZP1	leucine zipper protein 1		Nucleus	other			7798	269593	79428
MAFB	v-maf avian musculoaponeurotic fibrosarcoma oncogene homolog B		Nucleus	transcription regulator			9935	16658	54264
MAPKAPK3	mitogen-activated protein kinase-activated protein kinase 3		Nucleus	kinase	unspecified application		7867	102626	315994
MAX	MYC associated factor X	20	Nucleus	transcription regulator			4149	17187	60661
MBD3	methyl-CpG binding domain protein 3	8	Nucleus	enzyme			53615	17192	362834
MDM2	MDM2 proto-oncogene	2	Nucleus	transcription regulator	disease progression,efficacy,unspecified application	CGM097, DS-3032b, HDM201, idasanutlin, RO6839921	4193	17246	314856
MED28	mediator complex subunit 28		Nucleus	other			80306	66999	305391
MED30	mediator complex subunit 30	14,21	Nucleus	transcription regulator			90390	69790	299905
MEF2D	myocyte enhancer factor 2D		Nucleus	transcription regulator			4209	17261	81518
MKX	mohawk homeobox		Nucleus	transcription regulator			283078	210719	291228
MLF2	myeloid leukemia factor 2		Nucleus	other			8079	30853	312709
MORF4L1	mortality factor 4 like 1		Nucleus	other			10933	21761	300891
MORF4L2	mortality factor 4 like 2		Nucleus	other			9643	56397	317413
MPG	N-methylpurine DNA glycosylase		Nucleus	enzyme			4350	268395	24561
MRFAP1	Morf4 family associated protein 1		Nucleus	other			93621	67568	282585
MVP	major vault protein		Nucleus	other			9961	78388	64681
MYB	MYB proto-oncogene, transcription factor		Nucleus	transcription regulator			4602	17863
MYBBP1A	MYB binding protein 1a	7	Nucleus	transcription regulator	unspecified application		10514	18432	60571
MYBL2	MYB proto-oncogene like 2		Nucleus	transcription regulator			4605	17865	296344
MYC	v-myc avian myelocytomatosis viral oncogene homolog	12,20	Nucleus	transcription regulator	diagnosis,efficacy,prognosis,response to therapy,unspecified application		4609	17869	24577
MYOCD	myocardin		Nucleus	transcription regulator			93649	214384	246297
NCOA5	nuclear receptor coactivator 5		Nucleus	other			57727	228869	296372
NCOR2	nuclear receptor corepressor 2		Nucleus	transcription regulator			9612	20602	360801
NEIL2	nei like DNA glycosylase 2		Nucleus	enzyme			252969	382913	305957
NFE2L2	nuclear factor, erythroid 2 like 2	21,23	Nucleus	transcription regulator	efficacy	RTA 408	4780	18024	83619
NFIC	nuclear factor I C	9	Nucleus	transcription regulator			4782	18029	29228
NFkB (complex)	--	5	Nucleus	complex	diagnosis,disease progression,efficacy,prognosis	NF-kappaB inhibitor, dexanabinol
NME2	NME/NM23 nucleoside diphosphate kinase 2	10	Nucleus	kinase			4831	18103	83782
NONO	non-POU domain containing, octamer-binding	13	Nucleus	other			4841	53610	317259
NPM1	nucleophosmin (nucleolar phosphoprotein B23, numatrin)	1	Nucleus	transcription regulator	disease progression,unspecified application		4869	18148	25498
NR3C1	nuclear receptor subfamily 3 group C member 1		Nucleus	ligand-dependent nuclear receptor	efficacy	rimexolone, medrysone, clocortolone pivalate, diflorasone diacetate, fluorometholone, dexamethasone phosphate, cortisone acetate, halcinonide, flurandrenolide, desoximetasone, desonide, prednisolone, clobetasol propionate, fluocinolone acetonide, prednisone, hydrocortisone, triamcinolone, dexamethasone 21-acetate, 11beta hydrocortisone acetate, betamethasone, dexamethasone, budesonide, fluticason…	2908	14815	24413
NR3C2	nuclear receptor subfamily 3 group C member 2		Nucleus	ligand-dependent nuclear receptor		fludrocortisone, aldosterone receptor antagonist, drospirenone/ethinyl estradiol, hydrochlorothiazide/spironolactone, fludrocortisone acetate, drospirenone, spironolactone, eplerenone, progesterone	4306	110784	25672
NR4A1	nuclear receptor subfamily 4 group A member 1		Nucleus	ligand-dependent nuclear receptor	unspecified application		3164	15370	79240
NRL	neural retina leucine zipper	19	Nucleus	transcription regulator			4901	18185	290221
NUTF2	nuclear transport factor 2		Nucleus	transporter			10204	621832|68051	291981
NXF1	nuclear RNA export factor 1	13	Nucleus	transporter			10482	53319	59087
P3H1	prolyl 3-hydroxylase 1	15	Nucleus	enzyme			64175	56401	114200
PA2G4	proliferation-associated 2G4	16	Nucleus	transcription regulator			5036	18813	288778
PABPN1	poly(A) binding protein nuclear 1	6	Nucleus	enzyme			8106	54196	116697
PARK7	Parkinsonism associated deglycase	3	Nucleus	enzyme	diagnosis		11315	57320	117287
PARP	--	8	Nucleus	group		niraparib, E-7016, talazoparib, poly ADP-ribose polymerase inhibitor, AZD-2461, niacinamide
PBXIP1	pre-B-cell leukemia homeobox interacting protein 1		Nucleus	transcription regulator			57326	229534	310644
PCBP1	poly(rC) binding protein 1	8	Nucleus	translation regulator			5093	23983	500242
PCBP2	poly(rC) binding protein 2	16	Nucleus	other			5094	18521	363005
PDCD5	programmed cell death 5	5	Nucleus	other			9141	100042424|56330	100912106|292814
PIAS1	protein inhibitor of activated STAT 1		Nucleus	transcription regulator	unspecified application		8554	56469	300772
PIN4	peptidylprolyl cis/trans isomerase, NIMA-interacting 4	14,21	Nucleus	enzyme			5303	69713	684441
PML	promyelocytic leukemia	23	Nucleus	transcription regulator		arsenic trioxide	5371	18854	315713
PNKP	polynucleotide kinase 3'-phosphatase		Nucleus	kinase			11284	59047	308576
POLDIP3	polymerase (DNA) delta interacting protein 3		Nucleus	other			84271	73826	315170
POLR1B	polymerase (RNA) I subunit B	20	Nucleus	enzyme			84172	20017	83582
POLR2G	polymerase (RNA) II subunit G	20	Nucleus	enzyme			5436	67710	117017
POMP	proteasome maturation protein	22	Nucleus	other			51371	66537	288455|100911238
POU6F1	POU class 6 homeobox 1		Nucleus	transcription regulator			5463	19009	116545
PPARA	peroxisome proliferator activated receptor alpha	24	Nucleus	ligand-dependent nuclear receptor	diagnosis	choline fenofibrate, aleglitazar, fenofibric acid/rosuvastatin, atorvastatin/choline fenofibrate, choline fenofibrate/simvastatin, ezetimibe/fenofibrate, fenofibrate/simvastatin, NS-220, tesaglitazar, bezafibrate, clofibrate, fenofibrate, docosahexaenoic acid, gemfibrozil	5465	19013	25747
PPARD	peroxisome proliferator activated receptor delta		Nucleus	ligand-dependent nuclear receptor	diagnosis	treprostinil, icosapent, GW501516, bezafibrate	5467	19015	25682
PPARG	peroxisome proliferator activated receptor gamma		Nucleus	ligand-dependent nuclear receptor	diagnosis,efficacy,unspecified application	icosapent, amlodipine/telmisartan, inolitazone, aleglitazar, aspirin/dipyridamole/telmisartan, clopidogrel/telmisartan, glimepiride/rosiglitazone, nicotinic acid/pioglitazone, alogliptin/pioglitazone, glimepiride/pioglitazone, rosiglitazone, farglitazar, sulfasalazine, pioglitazone, telmisartan, tesaglitazar, troglitazone, hydrochlorothiazide/telmisartan, balsalazide, mesalamine, bezafibrate	5468	19016	25664
PPARGC1A	PPARG coactivator 1 alpha		Nucleus	transcription regulator	diagnosis,efficacy		10891	19017	83516
PPARGC1B	PPARG coactivator 1 beta		Nucleus	transcription regulator			133522	170826	291567
PRMT1	protein arginine methyltransferase 1	23	Nucleus	enzyme			3276	15469	60421
PRPF8	pre-mRNA processing factor 8	23	Nucleus	other			10594	192159	287530
PSMA8	proteasome subunit alpha 8	21	Nucleus	peptidase			143471	73677	364814
PSMC1	proteasome 26S subunit, ATPase 1	10,22	Nucleus	peptidase			5700	19179	117263
PSMC2	proteasome 26S subunit, ATPase 2	22	Nucleus	peptidase			5701	19181	25581
PSMC3	proteasome 26S subunit, ATPase 3	10	Nucleus	transcription regulator			5702	19182	29677
PSMC4	proteasome 26S subunit, ATPase 4	22	Nucleus	peptidase			5704	23996	117262
PYHIN1	pyrin and HIN domain family member 1		Nucleus	other			149628
RAN	RAN, member RAS oncogene family	10	Nucleus	enzyme			5901	19384	84509
RBBP4	retinoblastoma binding protein 4	9,16	Nucleus	enzyme			5928	19646	313048
RBBP7	retinoblastoma binding protein 7	9,16	Nucleus	transcription regulator			5931	245688	83712
RELA	RELA proto-oncogene, NF-kB subunit	1	Nucleus	transcription regulator	diagnosis,efficacy	NF-kappaB decoy	5970	19697	309165
RFX1	regulatory factor X1		Nucleus	transcription regulator	diagnosis		5989	19724	288906
RLIM	ring finger protein, LIM domain interacting		Nucleus	enzyme			51132	19820	100910646|317241
RNA polymerase II	--	9	Nucleus	complex
RNF6	ring finger protein (C3H2C3 type) 6		Nucleus	transcription regulator			6049	74132	304271
RNF7	ring finger protein 7		Nucleus	enzyme			9616	19823	300948
RNF187	ring finger protein 187	2	Nucleus	enzyme			149603	108660	360533
RPL3	ribosomal protein L3	18	Nucleus	other		omacetaxine mepesuccinate	6122	27367	300079
RPL6	ribosomal protein L6	21	Nucleus	other	unspecified application		6128	432502|19988	117042
RPL7	ribosomal protein L7	19	Nucleus	transcription regulator			6129	19989	297755
RPL9	ribosomal protein L9	14	Nucleus	other	diagnosis		6133	20005	100360449|29257|100364457
RPL12	ribosomal protein L12	9	Nucleus	other			6136	269261	102555453|499782
RPL13	ribosomal protein L13		Nucleus	other			6137	270106|100040416	81765
RPL22	ribosomal protein L22		Nucleus	other			6146	19934	81768
RPL10A	ribosomal protein L10a	9	Nucleus	other			4736	19896	81729
Rplp1 (includes others)	ribosomal protein, large, P1	14	Nucleus	other				384081|666574|56040|279067|102637947
RRP1	ribosomal RNA processing 1		Nucleus	other			8568		309674
RUVBL1	RuvB like AAA ATPase 1		Nucleus	transcription regulator			8607	56505	65137
SCAND1	SCAN domain containing 1		Nucleus	transcription regulator			51282	19018	362252
SF1	splicing factor 1		Nucleus	transcription regulator			7536
SF3B3	splicing factor 3b subunit 3	2	Nucleus	other	unspecified application		23450	101943	292019
SF3B5	splicing factor 3b subunit 5	19	Nucleus	other			83443	66125	680891
SH3BGRL3	SH3 domain binding glutamate rich protein like 3		Nucleus	other			83442	73723	298544
SHFM1	split hand/foot malformation (ectrodactyly) type 1	14	Nucleus	peptidase			7979	20422	680532
SHISA5	shisa family member 5		Nucleus	other			51246	66940	301013
Sin3b	SIN3 transcription regulator family member B	20	Nucleus	transcription regulator					683381
SKI	SKI proto-oncogene		Nucleus	transcription regulator			6497	20481	313757
SMAD1	SMAD family member 1		Nucleus	transcription regulator			4086	17125	25671
SMAD2	SMAD family member 2		Nucleus	transcription regulator			4087	17126	29357
SMAD3	SMAD family member 3		Nucleus	transcription regulator			4088	17127	25631
SMAD4	SMAD family member 4		Nucleus	transcription regulator	prognosis,unspecified application		4089	17128	50554
SMAD7	SMAD family member 7		Nucleus	transcription regulator			4092	17131	81516
SMARCA1	SWI/SNF related, matrix associated, actin dependent regulator of chromatin, subfamily a, member 1	16	Nucleus	transcription regulator			6594	93761	317575
SMARCA4	SWI/SNF related, matrix associated, actin dependent regulator of chromatin, subfamily a, member 4	9	Nucleus	transcription regulator			6597	20586	171379
SNRNP70	small nuclear ribonucleoprotein U1 subunit 70	2	Nucleus	other			6625	20637	361574
SNRPD1	small nuclear ribonucleoprotein D1 polypeptide	20	Nucleus	other			6632	20641	291794
Snrpg	small nuclear ribonucleoprotein polypeptide G	2	Nucleus	other				68011	687679|681031
SP3	Sp3 transcription factor		Nucleus	transcription regulator			6670	20687	367846
SP110	SP110 nuclear body protein		Nucleus	other			3431	546061|109032|624083|101056250|677525|102638047	301570
SRA1	steroid receptor RNA activator 1		Nucleus	transcription regulator			10011	24068	252891
SRP68	signal recognition particle 68	15	Nucleus	other			6730	217337	363707
SRPK1	SRSF protein kinase 1		Nucleus	kinase			6732	20815	361811
Srrm1	serine/arginine repetitive matrix 1	2	Nucleus	other				51796	313620
SRSF7	serine/arginine-rich splicing factor 7	13	Nucleus	other			6432	225027	362687
SSB	Sjogren syndrome antigen B		Nucleus	enzyme			6741	20823	81783
SSRP1	structure specific recognition protein 1	7	Nucleus	other			6749	20833	81785
SUB1	SUB1 homolog, transcriptional regulator	25	Nucleus	transcription regulator			10923	20024	192269
SUMO1	small ubiquitin-like modifier 1	8	Nucleus	enzyme			7341	22218	301442
SUMO2	small ubiquitin-like modifier 2		Nucleus	enzyme			6613	170930	690244
SUN2	Sad1 and UNC84 domain containing 2		Nucleus	other			25777	223697	315135
SUPT5H	SPT5 homolog, DSIF elongation factor subunit		Nucleus	transcription regulator			6829	20924	308472
SYNCRIP	synaptotagmin binding cytoplasmic RNA interacting protein		Nucleus	other			10492	56403
TAZ	tafazzin		Nucleus	enzyme			6901	66826	363521
TCEB1	transcription elongation factor B subunit 1	17	Nucleus	transcription regulator			6921	67923	64525
[truncated: 224 more rows]
