# Supplementary material for: Adult mouse fibroblasts retain organ-specific transcriptomic identity
Source: eLife. 2022 Mar 16;11:e71008. doi: 10.7554/eLife.71008 (PMC8959603; doi:10.7554/eLife.71008)
Supplement: Figure 1—source data 2. [file elife-71008-fig1-data2.xlsx]

## Sheet: Hox code - v1
	Average							Std error
Gene Names	Gonad	Heart	Liver	Lung	Skin	Tail	Kidney	Gonad	Heart	Liver	Lung	Skin	Tail	Kidney
Hoxa1	1506.7	960.927	3021.5	2619.74	2181.63	1117.52	4831.72	182.414	436.41	416.36	343.092	128.119	36.5692	1345.12
Hoxb1	33.1133	74.7439	27.3291	271.94	28.7007	31.9327	166.849	4.6024	47.9209	0.933232	244.307	3.15618	4.24428	74.744
Hoxd1	103.697	494.761	41.4958	35.0733	73.3755	102.016	2229.72	69.2391	459.213	6.03202	2.01308	16.6313	36.3721	1294.12
Hoxa2	117.363	324.594	439.829	616.073	88.3755	118.183	1117.72	32.3646	283.306	85.0871	48.9878	9.63133	43.3651	279.119
Hoxb2	618.03	499.761	2418.5	2412.91	1211.88	588.683	3499.97	106.332	205.817	266.294	136.691	25.3687	21.4314	1245.87
Hoxa3	923.697	111.594	4979.83	5339.57	631.626	190.016	5805.97	59.4424	32.7858	1141.68	232.688	75.1187	15.1177	444.131
Hoxb3	243.697	573.761	192.996	217.407	183.126	171.683	2014.72	97.2983	507.466	18.5568	88.4457	16.3813	43.4445	966.119
Hoxd3	170.697	299.427	46.1625	35.0733	60.8755	66.3494	1032.97	17.245	262.643	7.48404	2.88434	12.1313	25.7913	576.869
Hoxa4	111.863	129.761	373.496	350.74	91.3755	52.5161	1170.22	21.094	94.7477	114.868	40.5254	10.6313	1.8728	136.881
Hoxb4	1259.53	540.594	4513.66	3436.07	1526.38	990.849	3859.72	169.047	217.51	343.921	1695.02	45.6313	30.3493	799.119
Hoxc4	1915.36	270.927	893.329	678.573	1619.13	436.849	3428.72	175.921	209.399	69.4221	82.475	9.61867	44.5278	153.119
Hoxd4	1313.36	409.427	334.162	63.5733	217.376	76.6827	2367.97	225.906	366.412	215.519	4.51608	6.86867	27.2073	276.631
Hoxa5	258.53	260.261	1111.66	1890.74	129.876	120.516	2101.47	33.2744	226.234	332.99	180.897	7.13133	23.6057	206.369
Hoxb5	293.03	253.427	886.162	2141.07	266.376	381.683	1810.22	21.0548	214.402	73.5901	218.014	33.6313	54.4594	553.119
Hoxc5	383.363	802.761	167.829	140.073	489.376	217.516	6381.22	97.7042	758.471	12.6695	19.8191	71.6313	38.6964	1521.62
Hoxa6	260.863	1722.09	91.1625	147.907	324.376	306.849	7722.97	191.946	1659.56	11.2293	13.4834	1.36867	81.2687	2249.87
Hoxb6	1182.2	92.2605	1167.5	3279.07	1451.38	1302.85	5975.97	206.95	57.7381	94.6292	403.653	59.6313	112.931	1153.87
Hoxc6	8224.7	144.261	532.329	642.74	10466.6	1281.35	9226.22	640.481	97.4009	158.259	226.936	58.3813	46.2254	196.119
Hoxa7	1480.86	354.761	745.329	2165.07	1443.63	688.016	7129.47	186.419	284.777	196.575	186.386	117.119	57.4192	1533.87
Hoxb7	1467.86	79.9272	755.329	1584.07	1912.63	1534.52	5315.97	330.627	51.9438	113.167	40.4489	24.3813	130.415	1165.37
Hoxb8	1142.86	225.427	637.162	655.407	479.626	265.183	5081.72	351.313	190.648	468.958	115.517	35.6187	47.6224	2544.88
Hoxc8	288.363	253.927	33.6625	48.2399	428.876	81.8494	951.474	21.6756	217.388	2.99784	9.95019	10.8687	25.4521	230.369
Hoxd8	1664.7	233.594	243.996	67.7399	610.126	56.3494	1283.22	324.781	84.0459	79.0769	8.38542	25.3813	5.86168	338.119
Hoxa9	171.863	720.427	55.1625	59.5733	158.626	188.016	2937.47	95.283	672.38	3.03642	6.8525	4.38133	63.2606	1644.37
Hoxb9	818.363	104.927	111.662	126.407	3270.88	1550.18	6210.47	187.327	66.4415	25.7498	61.4915	8.13133	350.626	3071.63
Hoxc9	1809.03	437.761	42.8291	69.7399	6261.88	733.516	5291.47	71.8893	398.484	5.32707	23.4876	470.869	70.3972	623.369
Hoxd9	978.697	300.094	186.329	37.5733	107.126	62.1827	1756.47	117.19	259.046	66.3104	3.30071	3.38133	21.0349	711.369
Hoxa10	165.03	251.094	28.1625	28.2399	239.126	532.183	1228.47	24.7415	161.678	1.37263	2.8678	26.1187	32.0436	146.369
Hoxc10	567.53	3249.26	101.829	121.907	741.376	1086.52	15501.2	325.835	3156.46	15.8977	9.11544	21.6313	93.0853	2688.12
Hoxd10	1030.53	588.594	95.1625	48.9066	79.1255	127.683	2379.72	129.437	548.063	26.1418	10.377	21.3813	46.436	928.619
Hoxa11as	191.53	813.927	54.6625	62.2399	328.876	4226.68	3597.72	61.9299	765.898	3.28597	3.02362	44.8687	366.659	1412.62
Hoxa11	106.847	319.977	35.9125	37.4566	150.576	850.499	1360.87	26.9663	281.68	1.14817	0.426817	13.0687	114.426	494.869
Hoxc11	141.863	502.094	46.3291	41.9066	164.376	1556.18	1908.22	55.5383	460.802	6.02644	4.87734	7.63133	108.881	836.119
Hoxd11	257.363	1090.59	55.9958	61.7399	164.376	226.683	4426.97	73.1701	972.492	5.30037	5.38133	56.6313	117.874	1812.37
Hoxc12	210.863	1215.26	64.3291	55.9066	174.376	437.849	6027.97	158.665	1166.46	3.16153	3.39036	28.6313	103.95	1034.87
Hoxd12	24.5299	36.9378	24.8291	26.0733	30.1255	30.0161	112.024	1.47975	11.9045	1.27382	2.10948	2.88133	0.975872	77.8188
Hoxa13	211.03	1272.59	57.6625	70.5733	246.376	274.516	5789.72	172.809	1213.1	10.6549	2.08074	119.631	83.963	1027.62
Hoxb13	52.6966	196.261	31.1625	40.9066	69.6255	35430.5	484.224	19.0945	167.224	1.24297	5.55541	7.38133	1102.59	182.119
Hoxc13	470.03	211.927	69.4958	61.2399	416.126	3935.18	864.474	20.6199	160.879	6.32744	3.30139	27.1187	178.77	240.869
Hoxd13	52.0299	200.594	33.3291	34.0733	42.3755	54.3494	808.474	12.8164	164.049	3.58606	1.10808	0.368668	15.0144	289.369
