# Supplementary material for: Adult mouse fibroblasts retain organ-specific transcriptomic identity
Source: eLife. 2022 Mar 16;11:e71008. doi: 10.7554/eLife.71008 (PMC8959603; doi:10.7554/eLife.71008)
Supplement: Figure 2—figure supplement 7—source data 1. [file elife-71008-fig2-figsupp7-data1.xlsx]

## Sheet: HF_vs_CTRL
ENSEMBL ID	Gene Symbol	X2.044LV_GT17.14742_CTTGTA_S8_counts_cpm	X2.048LV_GT17.14745_ATGTCA_S5_counts_cpm	X3.149LV_GT17.14741_ACTTGA_S3_counts_cpm	X4.070LV11_GT17.14740_CAGATC_S7_counts_cpm	X4.062LV19_GT17.14736_CGATGT_S9_counts_cpm	X4.083LV3_GT17.14743_AGTCAA_S10_counts_cpm	X6.038LV14_GT17.14739_GCCAAT_S2_counts_cpm	X6.086LV_GT17.14737_TGACCA_S6_counts_cpm	X7.0201HD_GT17.14744_AGTTCC_S1_counts_cpm	X7044M63_GT17.14738_ACAGTG_S4_counts_cpm	Mean(HF)	Mean(CTRL)	LogFC	FC
ENSG00000162998	FRZB	2.32222	5.72795	1.58544	2.32222	1.58544	1.00072	1.00072	1.00072	4.80741	1.00072	3.20569	1.26502	3.00664	2.5341
ENSG00000164694	FNDC1	3.80746	3.45956	1.00072	4.00009	0.00144197	2.80756	0.00144197	1.58544	3.80746	1.00072	2.41533	1.87905	1.93084	1.2854
ENSG00000166482	MFAP4	5.58499	6.49187	3.58508	5.00005	3.58508	3.58508	2.80756	4.248	6.00002	4.4595	5.04941	4.02004	1.77115	1.25606
ENSG00000183801	OLFML1	2.00036	3.58508	1.58544	2.5852	1.00072	1.00072	2.00036	2.00036	3.00018	2.00036	2.23436	1.9174	1.03641	1.16531
ENSG00000111335	OAS2	3.00018	3.80746	3.00018	4.39239	3.00018	3.32207	3.58508	2.5852	4.248	3.00018	3.4112	3.37698	0.640359	1.01013
ENSG00000137726	FXYD6	4.322	4.7005	4.52362	4.85803	3.70055	4.248	4.322	4.00009	4.58502	4.322	4.36634	4.35002	0.463231	1.00375
ENSG00000119227	PIGZ	1.58544	1.58544	1.58544	1.58544	0.00144197	1.00072	1.58544	2.00036	2.32222	2.00036	1.416	1.63447	0.450739	0.866337
ENSG00000115232	ITGA4	1.58544	3.32207	2.32222	2.00036	2.00036	3.17009	2.32222	1.00072	2.32222	1.00072	2.31046	1.89882	0.368246	1.21679
ENSG00000134326	CMPK2	0.00144197	1.58544	2.00036	2.80756	1.00072	1.58544	2.00036	1.58544	2.00036	1.58544	1.31767	1.91285	0.354391	0.688849
ENSG00000169247	SH3TC2	3.17009	1.58544	3.00018	3.58508	2.5852	2.00036	2.32222	3.00018	3.17009	3.32207	2.7022	2.84598	0.306437	0.949479
ENSG00000198771	RCSD1	5.04444	4.90694	5.4263	5.32196	4.17001	5.00005	5.08751	5.08751	5.28544	5.55462	4.96662	5.21033	0.167059	0.953227
ENSG00000164116	GUCY1A3	5.72795	5.61474	6.3038	6.08748	5.16997	5.61474	6.20947	5.35759	5.4263	6.20947	5.64855	5.89575	0.0956836	0.958071
ENSG00000166183	ASPG	1.58544	1.58544	2.32222	2.32222	1.00072	1.00072	3.00018	1.58544	1.00072	1.58544	1.49891	1.8988	-0.0122547	0.789398
ENSG00000102010	BMX	0.00144197	1.58544	0.00144197	1.58544	1.00072	1.00072	0.00144197	1.00072	1.00072	1.00072	0.717954	0.91781	-0.0462996	0.782247
ENSG00000178860	MSC	0.00144197	2.00036	0.00144197	1.00072	2.32222	1.00072	1.00072	0.00144197	1.00072	0.00144197	1.06524	0.601009	-0.101029	1.77241
ENSG00000150672	DLG2	3.58508	3.17009	4.17001	3.90699	3.00018	4.322	3.32207	4.64391	3.45956	3.17009	3.47698	3.87301	-0.172741	0.897747
ENSG00000117594	HSD11B1	0.00144197	1.00072	1.00072	0.00144197	2.32222	0.00144197	0.00144197	0.00144197	1.58544	0.00144197	1.18211	0.00144197	-0.184017	819.785
ENSG00000046653	GPM6B	2.00036	2.80756	2.5852	2.32222	3.00018	3.00018	1.58544	2.5852	2.00036	2.00036	2.47873	2.29868	-0.231216	1.07833
ENSG00000061918	GUCY1B3	3.90699	3.58508	4.80741	4.4595	4.4595	4.52362	4.75494	4.00009	4.00009	4.52362	4.15181	4.45236	-0.253852	0.932498
ENSG00000154856	APCDD1	3.80746	4.17001	3.58508	4.75494	4.7005	3.58508	3.90699	4.58502	3.17009	4.4595	3.88663	4.25831	-0.293386	0.912716
ENSG00000164532	TBX20	4.80741	4.4595	5.20949	5.35759	5.12932	4.4595	6.08748	5.35759	5.20949	5.45946	4.96304	5.34432	-0.338839	0.928657
