# Supplementary material for: Adult mouse fibroblasts retain organ-specific transcriptomic identity
Source: eLife. 2022 Mar 16;11:e71008. doi: 10.7554/eLife.71008 (PMC8959603; doi:10.7554/eLife.71008)
Supplement: Figure 2—source data 1. [file elife-71008-fig2-data1.xlsx]

## Sheet: SkinOnly
GeneSymbol	organ number	organ combo	Gonad	Heart	Kidney	Liver	Lung	Skin
Rpl39l	1	Skin-	-1.11196	4.81545	-3.70496	2.90921	4.99528	227.626
Serpinb5	1	Skin-	2.88558	2.35591	8.58249	3.05248	2.45813	75.8461
Lgr6	1	Skin-	4.07535	5.42398	6.74127	7.81355	6.77968	54.5156
Mmp9	1	Skin-	-1.82223	-2.24696	2.52545	1.28392	-2.5468	50.9825
Pitx1	1	Skin-	2.75667	5.04939	4.53829	4.02874	6.5228	48.4732
Krt14	1	Skin-	1.52402	1.67337	5.34488	1.71179	3.30363	43.6705
F13a1	1	Skin-	1.6214	1.59767	1.01803	7.31565	2.6585	40.8852
Hp	1	Skin-	-1.20186	2.53166	-3.20185	-1.04222	2.86229	30.1306
Krt5	1	Skin-	-1.13569	1.03496	3.40457	-1.85203	-1.42372	27.7842
Lypd3	1	Skin-	1.14024	2.55821	8.44505	1.0159	-1.31921	25.1153
Pla2g7	1	Skin-	1.6567	-1.0914	2.70759	3.84544	3.25111	24.1207
Bcl11b	1	Skin-	-1.07271	1.46695	1.9988	-1.05264	1.37397	24.0446
Il13ra2	1	Skin-	-1.49686	-1.03811	-1.02578	1.06766	-1.51091	23.2827
U90926	1	Skin-	1.13964	-1.2086	2.40299	5.59775	6.03104	21.8796
Pramef12	1	Skin-	3.27225	4.63452	6.8005	6.87124	4.91126	21.8792
Creb3l3	1	Skin-	-3.16057	2.44934	-4.9922	4.19274	3.05556	19.8164
Serpinb2	1	Skin-	2.66297	-4.48422	3.70631	6.63205	2.40658	17.3114
Hoxc8	1	Skin-	5.95968	-1.20336	2.83278	-2.01187	-1.41635	16.8703
Fap	1	Skin-	1.69279	7.11057	4.2768	6.55671	5.76582	16.4922
Lce3d	1	Skin-	1.80669	1.47519	1.78608	4.2874	3.31865	16.1014
F730043M19Rik	1	Skin-	2.66798	9.85866	5.02244	4.44217	8.2345	15.1119
Tnfrsf26	1	Skin-	-2.48266	5.53479	-1.6389	2.98869	2.51754	14.8824
Stac2	1	Skin-	1.30221	-2.72155	-1.42762	1.61833	3.45078	14.8695
Tfpi2	1	Skin-	1.08795	1.57965	1.89884	3.85424	1.42626	14.6495
Chrna1	1	Skin-	1.51314	3.24236	4.07653	1.84977	3.03854	14.439
Stc1	1	Skin-	1.23754	1.76623	1.97136	1.67209	3.4216	14.2081
Dynap	1	Skin-	-1.44628	-1.6096	2.21843	-1.0493	1.46324	13.8007
Krt6a	1	Skin-	-1.08621	1.34118	4.34414	-1.47967	-1.29765	13.7228
Saa1	1	Skin-	1.77594	1.64136	4.16626	2.53856	1.99719	13.4106
Pcsk5	1	Skin-	7.25582	3.33834	1.44699	2.00198	1.63865	13.0285
Col17a1	1	Skin-	1.51061	-1.11571	-1.087	-1.4957	1.02718	12.8314
Thbs2	1	Skin-	-2.55942	1.03226	1.90371	-1.88434	1.79964	12.3518
Fabp7	1	Skin-	4.75176	3.96158	1.03994	6.97246	7.02629	12.0885
Fgf21	1	Skin-	-2.02823	-2.29719	-2.71249	3.40263	3.75379	11.9177
Unc93a	1	Skin-	3.37128	1.6529	2.21901	3.17199	2.62737	11.9064
Clstn2	1	Skin-	2.3591	1.89937	7.68078	9.53138	8.46276	11.8173
C230098O21Rik	1	Skin-	2.45783	6.09487	-1.21087	4.22976	4.34134	11.6207
Lrrc15	1	Skin-	-58.7848	-70.6663	-13.9119	-20.0195	-16.5884	11.5007
Hmga2-ps1	1	Skin-	2.05762	2.05431	4.52914	2.40667	1.87078	11.4758
Postn	1	Skin-	1.63144	6.2764	-1.02201	3.08873	1.31856	11.4081
Pgr	1	Skin-	3.09021	1.59202	3.72163	2.20675	3.0056	11.2803
Dnmt3l	1	Skin-	1.16901	4.53616	-2.09432	1.38429	2.70718	11.1644
Rph3a	1	Skin-	1.25034	1.30687	4.77643	2.13072	1.24306	11.0845
Gm10099	1	Skin-	4.45644	3.974	3.96643	9.0215	6.53333	10.9346
Il4ra	1	Skin-	-1.02089	4.2648	-1.53023	2.97742	4.11412	10.3977
Rbp4	1	Skin-	-6.90113	-1.53248	-3.32511	-1.67995	1.39146	10.3475
Slc7a11	1	Skin-	2.67338	4.83252	3.08654	9.77805	5.3034	10.3023
Tnfaip6	1	Skin-	2.55283	5.70779	-1.23285	3.97501	2.42984	10.1503

## Sheet: LungOnly
GeneSymbol	organ number	organ combo	Gonad	Heart	Kidney	Liver	Lung	Skin
Hsd3b1	1	Lung-	8.67495	5.21834	3.39643	6.23214	57.4446	2.50087
Frmd5	1	Lung-	7.67916	1.80881	1.20409	5.91493	47.1259	2.09821
Fam19a2	1	Lung-	2.20245	1.70826	3.4814	9.61767	42.8829	2.86863
Slc14a1	1	Lung-	3.46127	1.48365	2.23858	3.21847	40.7429	2.65668
Cpb1	1	Lung-	2.11196	1.93974	-1.79597	5.23358	34.6094	-1.16266
Ntf3	1	Lung-	1.5011	-2.02337	-3.06017	8.24742	31.9149	-2.00914
Mdga2	1	Lung-	1.5512	1.62551	1.28795	1.73571	29.1161	1.25171
4930478M13Rik	1	Lung-	1.76423	4.73018	-1.08064	1.85023	27.3347	-1.80666
Ear2	1	Lung-	-1.52292	-1.63435	1.29548	1.57726	24.9213	-1.27405
Lrp2	1	Lung-	3.39425	-3.89387	1.55153	5.06082	23.9929	1.27879
Kcna1	1	Lung-	1.77878	1.89337	2.33674	2.33593	23.8415	1.23082
Prr15	1	Lung-	4.39849	-1.00409	2.90713	7.91886	22.1801	-1.65853
Scrg1	1	Lung-	1.35748	5.98245	1.93305	1.05295	21.6242	1.07566
Agtr1b	1	Lung-	2.094	1.13825	-1.05268	2.96321	21.2166	1.04012
Ear11	1	Lung-	2.26299	2.11625	1.3847	2.46469	21.1881	2.03966
Rpp25	1	Lung-	8.48285	7.49975	5.05422	7.87401	18.7744	6.3134
Prl	1	Lung-	2.32719	5.27314	1.78056	1.89879	18.408	3.04647
Gsc	1	Lung-	1.61665	3.47469	2.17646	4.43616	17.8429	4.3602
Cxcl13	1	Lung-	1.41271	1.53795	1.08464	2.33294	16.3383	1.48106
Myh1	1	Lung-	5.27719	6.64035	1.85645	6.1391	16.1549	3.28231
Fgf1	1	Lung-	5.70319	2.12633	8.20295	7.02689	16.0305	1.13884
Sorl1	1	Lung-	2.87704	5.04352	2.41824	9.66081	15.6597	1.96449
Adamts15	1	Lung-	-3.45408	-1.76918	-1.85181	-1.03004	15.1814	1.3113
3110099E03Rik	1	Lung-	7.50253	9.06627	1.76168	8.83493	14.8936	1.91422
Ppm1e	1	Lung-	4.10382	1.44213	1.02011	5.87758	14.7201	1.11073
Rhpn2	1	Lung-	3.86048	1.82468	2.73759	7.42589	14.5525	1.94016
Fam180a	1	Lung-	7.18405	2.56904	4.08715	8.6706	13.9313	-1.19163
Cdhr1	1	Lung-	4.31242	2.7066	1.33994	9.62749	13.7905	-2.1483
Inmt	1	Lung-	2.10052	2.08593	1.56615	4.56793	13.6973	1.47327
Lingo2	1	Lung-	1.93764	1.42733	3.61382	1.30403	13.5651	2.61091
Tac1	1	Lung-	-1.35431	2.20621	2.62996	1.7569	13.4794	8.94695
Fendrr	1	Lung-	1.37461	2.40286	1.57451	9.8365	12.7152	1.08784
Bicd1	1	Lung-	4.14336	4.38623	4.44292	8.98034	12.6393	1.63808
Steap4	1	Lung-	1.65911	1.64026	3.11735	6.89695	12.6156	1.87615
Ifnlr1	1	Lung-	1.71523	1.87747	5.40772	9.83576	12.4984	1.67309
Gabra3	1	Lung-	1.19357	2.51827	-1.18399	3.19901	12.4742	1.55337
Pcdh20	1	Lung-	5.77846	2.43931	2.15499	6.56326	12.4101	2.41186
E130104P22Rik	1	Lung-	5.32706	1.85885	7.17603	7.79956	12.2881	4.28417
Angptl7	1	Lung-	-2.90661	-29.9094	-3.04968	4.86911	12.1408	-90.9055
P2ry1	1	Lung-	2.15133	4.705	1.51003	7.6112	12.0918	1.91945
LOC101056045	1	Lung-	1.95307	1.07986	1.99457	2.86231	11.8407	1.04839
Hdac9	1	Lung-	1.31507	1.64203	-1.84202	4.11274	11.8294	1.58683
Gm4123	1	Lung-	4.73411	3.7246	1.66445	7.59212	11.779	2.85562
Snca	1	Lung-	1.08078	-1.47771	3.31455	8.27681	11.7309	3.03957
Tll1	1	Lung-	4.51377	1.01531	3.47478	9.85988	11.5123	4.33064
Bmp3	1	Lung-	1.45482	2.45388	2.01832	2.98609	11.4832	1.04706
Foxf1	1	Lung-	-2.85176	-1.04771	-3.94633	7.95428	10.9936	2.2122
Ezr	1	Lung-	3.33544	-2.89729	6.67118	6.83456	10.9554	-1.63682
Ephx2	1	Lung-	6.48825	6.84693	-1.78874	9.96995	10.8118	1.82943
Cysltr1	1	Lung-	1.64138	1.56492	3.16877	5.7736	10.5832	1.68102
Cyp2d22	1	Lung-	3.33993	5.92296	1.73742	5.00973	10.4948	2.90908
Btc	1	Lung-	3.43334	3.2064	3.29587	8.29919	10.3756	1.3444
1110002E22Rik	1	Lung-	1.30887	1.43802	3.63832	4.92412	10.368	5.93324
6720483E21Rik	1	Lung-	4.40635	2.60055	1.40859	6.46696	10.2726	1.80087
Zim1	1	Lung-	5.02082	1.43361	3.42427	5.62189	10.0997	1.94265
B3galt1	1	Lung-	5.12524	6.97516	-1.33837	6.41909	10.01	2.51609

## Sheet: LiverOnly
GeneSymbol	organ number	organ combo	Gonad	Heart	Kidney	Liver	Lung	Skin
Cldn5	1	Liver-	3.82738	4.782	2.76013	91.2988	5.92055	2.88865
Gimap1	1	Liver-	8.0893	1.59079	2.61988	63.1902	3.69386	1.53656
Gimap5	1	Liver-	8.32179	1.74396	1.3013	62.713	4.25157	1.80406
Fam167b	1	Liver-	3.55315	3.49393	1.42458	61.6641	5.69489	1.3308
Inpp5d	1	Liver-	8.63782	1.14821	1.89761	60.4125	9.08814	2.13442
Selp	1	Liver-	5.51809	1.23645	5.07774	55.9651	4.71707	1.00847
Klhl4	1	Liver-	5.40236	1.0781	-1.13854	50.4045	1.7056	1.73287
Gimap8	1	Liver-	7.41548	2.00379	2.1624	44.9781	3.16731	1.48423
Vsig4	1	Liver-	-2.43266	-1.01876	-1.87016	39.7154	1.26134	-3.35239
Eltd1	1	Liver-	7.5986	2.05475	1.48168	37.7974	2.68566	1.3408
Sp5	1	Liver-	9.35975	1.54216	3.48369	35.0174	2.92276	1.90552
Myct1	1	Liver-	9.2718	1.51963	1.67442	34.9687	4.19066	1.46397
Hhex	1	Liver-	8.9404	1.39306	3.03721	34.4976	2.96787	1.27829
Rasip1	1	Liver-	3.59881	1.37	1.21387	34.3769	4.9809	1.88923
Trem2	1	Liver-	3.86626	-1.43449	1.38357	33.7309	7.86165	1.85237
Cd72	1	Liver-	2.10117	2.56537	1.23619	31.3903	3.1213	1.39306
Cd300ld	1	Liver-	2.38934	3.81318	2.22967	28.7664	5.52282	2.17939
Ccl4	1	Liver-	1.45687	3.59806	1.28425	28.6925	5.1748	2.82597
Gpr116	1	Liver-	5.76212	-1.4381	2.03716	27.4528	1.76428	-1.41049
Tnfsf18	1	Liver-	7.78666	9.15089	4.93182	26.2569	6.95933	1.70296
Lilrb4	1	Liver-	1.13078	1.10455	1.81665	25.3476	6.6855	1.68328
Gpr4	1	Liver-	7.55749	1.89013	5.72033	23.6991	3.32037	1.4074
Lcp1	1	Liver-	1.85055	1.36361	1.65213	23.563	7.06458	1.25601
Ebi3	1	Liver-	2.61463	2.23027	4.09752	21.6606	2.9121	1.33929
Hcls1	1	Liver-	4.11212	2.76718	2.12257	21.3157	3.42134	1.10442
Asb4	1	Liver-	4.88608	7.2718	3.22753	20.4165	6.04091	1.12412
Ms4a6d	1	Liver-	2.01504	1.3105	2.31642	20.4127	2.72678	3.26321
Car8	1	Liver-	3.86618	2.69268	3.87857	19.9726	1.54345	1.43237
Sox7	1	Liver-	4.76512	7.23278	3.155	19.8432	3.53959	-1.51409
Isl2	1	Liver-	1.76565	1.85694	9.24832	19.6202	1.82534	2.09293
Tal1	1	Liver-	6.52828	1.96118	2.52139	19.5961	2.00311	-1.0462
Pcdh17	1	Liver-	3.54908	1.00523	1.52598	18.9667	8.4054	-1.30562
Neurl3	1	Liver-	2.50843	1.35889	3.00394	18.8541	3.53547	3.18495
Lrg1	1	Liver-	2.12082	1.32368	-1.34541	18.7208	1.71065	1.22095
Cd5l	1	Liver-	1.06105	1.25943	5.72229	18.3792	-1.69205	-1.41127
Edn1	1	Liver-	5.87977	9.24877	5.52888	18.3361	8.60461	3.98451
Barx1	1	Liver-	1.08831	1.60205	-1.08309	18.1057	3.21271	-1.11883
Flt4	1	Liver-	4.10443	2.10753	4.40404	18.0531	2.09932	2.55726
AI467606	1	Liver-	4.06356	1.02159	4.50429	17.9981	1.31102	-1.13087
Clec4d	1	Liver-	-1.08672	1.36037	3.09532	17.8852	6.19054	2.30607
Sprr2k	1	Liver-	4.04147	2.54299	1.11577	17.8726	2.04745	3.42651
Nptx2	1	Liver-	5.06587	-1.48698	2.77626	17.4061	8.74578	-1.05671
Fcgr3	1	Liver-	1.79651	1.83872	1.94194	17.1666	7.74166	1.80503
Gm525	1	Liver-	8.79076	1.84453	5.38039	16.9314	1.80859	1.91736
Lce1l	1	Liver-	7.27838	1.19075	4.86538	16.4714	1.29154	1.75337
Bik	1	Liver-	5.59222	-1.08186	3.49783	15.9181	3.09912	-1.25361
Stab2	1	Liver-	1.45366	1.2297	1.50928	15.9172	-1.0874	1.14355
Lyl1	1	Liver-	5.67736	1.58477	6.52112	15.8924	1.73213	-1.07652
Kif26a	1	Liver-	3.25905	1.64707	1.36993	15.615	1.42175	3.18388
Emr1	1	Liver-	1.83167	1.21775	2.11211	15.4928	3.39889	1.45627
Dnah10	1	Liver-	5.34216	7.11066	3.74125	15.3028	6.83176	4.86043
Ly86	1	Liver-	-1.8454	-1.14585	1.04272	14.962	4.16203	-1.44897
Mrc1	1	Liver-	1.02912	-1.44802	-2.24019	14.5386	5.94116	-1.34533
Nrros	1	Liver-	1.35733	-1.10359	-1.38614	14.4124	4.46682	2.18792
Gm10134	1	Liver-	1.47086	1.89334	-1.32382	14.1837	3.53719	1.46947
Erg	1	Liver-	5.43802	1.05684	1.27781	14.1608	1.90277	1.12308
Fzd6	1	Liver-	5.12111	1.98931	8.20741	14.1351	8.09591	2.42309
Wnt4	1	Liver-	3.89849	-1.69959	1.809	14.0324	1.74977	2.31226
Arap3	1	Liver-	3.3837	2.13007	3.94767	13.9481	1.64007	1.85633
Tenm3	1	Liver-	2.45974	5.93723	2.39027	13.8631	7.71634	2.73561
Fermt3	1	Liver-	2.10974	2.34409	2.22045	13.8157	3.59924	1.50934
Hhatl	1	Liver-	7.44681	1.07893	4.72531	13.8118	7.31168	-1.23861
Pstpip1	1	Liver-	4.5673	2.8963	5.62165	13.7899	6.98179	8.89976
Tlr13	1	Liver-	1.3167	1.09853	-1.4239	13.7012	3.0204	1.38035
Tbx1	1	Liver-	5.19398	-6.8272	-3.77238	13.6235	1.96131	4.96688
Batf3	1	Liver-	2.74206	3.01387	2.7406	13.3315	9.49652	5.15736
Ms4a7	1	Liver-	1.10158	1.27482	3.23736	13.2045	2.21364	1.26517
Folr2	1	Liver-	3.38765	1.42132	2.47225	13.0572	1.74407	-1.40194
Gpihbp1	1	Liver-	2.06446	2.10861	1.46714	13.0398	2.16138	1.60866
Egfl7	1	Liver-	3.04815	-1.16363	2.62162	12.9241	1.37634	1.74868
Ncf4	1	Liver-	1.31765	1.78626	1.12509	12.8974	3.59803	-1.26212
Lhx2	1	Liver-	1.4332	2.95297	1.13303	12.8833	-1.02626	2.73382
Madcam1	1	Liver-	3.53168	3.14884	1.5331	12.8368	2.20438	2.48927
Traf1	1	Liver-	3.72376	2.02265	7.50562	12.5853	4.29987	2.25259
Gp49a	1	Liver-	2.61043	1.25667	1.02119	12.5515	2.83225	1.54884
Cdk6	1	Liver-	3.07466	6.32895	2.00829	12.5493	9.54599	3.98449
Sox17	1	Liver-	4.18474	1.59465	1.66786	12.483	2.79642	1.37841
Aff2	1	Liver-	6.06197	4.69936	2.85415	12.4528	6.47038	4.73879
Lyz2	1	Liver-	-1.03461	2.22882	-1.1325	12.3045	6.54172	-1.24241
Laptm5	1	Liver-	1.6224	2.0541	2.39033	12.2346	4.19438	1.66331
Isl1	1	Liver-	1.15757	1.10828	1.46087	12.1473	2.18674	1.10125
C3ar1	1	Liver-	3.40127	1.39132	3.29384	12.0449	3.22848	-1.02472
Sowahd	1	Liver-	8.68646	9.82856	2.52974	11.9432	7.99774	1.6103
Cd36	1	Liver-	2.18954	1.13626	4.50641	11.936	2.68477	1.46557
Prox1	1	Liver-	3.68487	1.50962	1.49475	11.9269	1.21449	3.26013
Plxna4	1	Liver-	3.16796	2.61681	2.74657	11.8693	7.36403	7.98685
Gja4	1	Liver-	6.47418	3.63638	6.08354	11.6362	-1.19773	1.13646
Rasgef1b	1	Liver-	7.46899	2.06265	-1.25315	11.391	8.80946	1.23589
Nos3	1	Liver-	1.56619	-1.62193	-1.70749	11.3421	1.75501	1.12806
Clec4a1	1	Liver-	5.25749	2.58789	2.20248	11.2212	4.41549	2.90157
Npy4r	1	Liver-	2.82426	1.46781	-1.1643	11.023	3.5165	1.64468
Mgat4a	1	Liver-	1.91061	4.46102	1.91096	11.009	9.03855	2.44695
Dtx1	1	Liver-	9.2614	3.55316	2.61526	10.9322	2.33603	2.26196
Adam26b	1	Liver-	3.52421	2.45055	3.86715	10.8632	3.64215	3.00561
Arhgap25	1	Liver-	3.20648	1.75857	2.83416	10.8221	2.28338	2.47208
Mfng	1	Liver-	2.45745	1.51101	4.27537	10.7901	2.82967	1.21554
Gm1987	1	Liver-	3.95279	2.7271	-1.05631	10.6963	2.05854	1.89081
Ptpn18	1	Liver-	1.26352	4.18928	6.8708	10.3888	2.34347	-1.00217
Hspb2	1	Liver-	8.19352	3.34909	1.05828	10.3681	6.47052	2.02004
Gpr84	1	Liver-	3.12785	2.08429	4.31536	10.3029	2.92585	5.37126
C1qb	1	Liver-	1.22687	1.19012	2.54535	10.2881	2.05126	1.11496
Lrrn2	1	Liver-	2.82562	5.20756	2.79304	10.2365	4.76259	4.6577
2900073C17Rik	1	Liver-	3.13128	8.51863	3.43075	10.042	5.47175	3.3915
Gm567	1	Liver-	7.05808	1.83889	5.91668	10.0409	1.55374	2.11875

## Sheet: KidneyOnly
GeneSymbol	organ number	organ combo	Gonad	Heart	Kidney	Liver	Lung	Skin
Cdh16	1	Kidney-	1.12065	-1.00072	676.621	-2.42717	-2.13146	-1.49955
Pdzk1ip1	1	Kidney-	1.85157	-1.2147	343.785	3.41857	2.60934	1.52491
Wfdc2	1	Kidney-	-2.24725	-1.78343	325.602	1.94274	4.1288	-1.31953
Mal	1	Kidney-	-1.20009	-1.26991	142.176	-1.06259	1.60773	1.67109
2310007B03Rik	1	Kidney-	1.74573	1.6163	95.6514	2.47892	9.80507	3.99784
Plekhs1	1	Kidney-	1.32513	1.66424	91.9882	6.03961	3.33922	1.56022
Mal2	1	Kidney-	2.15828	1.13302	90.7885	1.03142	6.27092	1.52604
Cldn7	1	Kidney-	1.12477	1.11592	77.8734	2.01264	2.94634	2.39749
Cldn3	1	Kidney-	1.68557	2.38757	76.1489	2.02201	4.49092	2.78653
Akr1c19	1	Kidney-	2.39632	8.08168	70.4306	1.94053	1.81736	3.31329
Lcn2	1	Kidney-	1.18453	-2.88845	64.1437	1.63052	-3.76061	1.28793
Pax8	1	Kidney-	5.33591	1.40599	62.6866	1.2523	1.11793	1.5345
Cldn4	1	Kidney-	-1.11736	1.41712	61.6832	1.27345	1.37075	3.1987
1700011H14Rik	1	Kidney-	1.21879	1.0508	56.0249	-1.48137	-1.60264	-1.14641
Gprc5c	1	Kidney-	2.30529	1.19828	52.4271	3.68886	2.05129	-1.24217
9030625G05Rik	1	Kidney-	1.88469	-1.39991	52.1541	3.33445	1.23574	-1.05361
Lad1	1	Kidney-	1.13975	-1.32243	48.1854	1.08703	-1.49623	2.14611
Smim22	1	Kidney-	-1.17253	-1.03519	44.6357	-1.0847	1.64247	-1.13021
Wnt7a	1	Kidney-	-1.81456	-1.10926	42.9618	-1.05713	1.75454	-1.18081
Lamb3	1	Kidney-	-1.36865	-1.10914	42.3609	1.10254	2.68692	9.78188
Glrp1	1	Kidney-	1.69701	1.33591	41.1405	3.21019	1.3746	6.72612
Rab25	1	Kidney-	2.25423	1.91967	38.0743	2.36509	3.78891	4.04492
Gpr56	1	Kidney-	2.24049	-10.0583	38.0224	2.49941	1.32146	-1.15482
Cdh1	1	Kidney-	1.11378	1.52056	37.485	1.06013	1.58346	2.22982
0610040J01Rik	1	Kidney-	-2.08404	-1.50322	37.0789	1.32981	1.30003	-2.27358
1810019J16Rik	1	Kidney-	1.65951	-1.18966	32.4049	1.22152	2.65815	3.64215
Car2	1	Kidney-	1.68681	-1.89586	31.354	1.13733	2.48082	7.66739
Krt20	1	Kidney-	1.78613	1.02504	30.2684	1.38438	1.15238	4.16462
Arhgef16	1	Kidney-	1.25599	1.13827	28.9608	-1.03228	1.54956	-1.08553
Wnt10a	1	Kidney-	-1.14308	-4.81178	28.1989	1.08817	2.49926	8.65186
AI661453	1	Kidney-	2.10127	2.89508	27.9558	3.5058	5.60633	7.02127
Havcr1	1	Kidney-	-1.49509	-1.22529	27.7216	-3.62402	-2.71078	-2.07432
Prss22	1	Kidney-	-1.02113	1.61177	27.5844	-1.30708	1.19203	1.16822
Grb7	1	Kidney-	1.79801	1.38622	26.2139	2.55694	1.04372	2.13188
Bmp7	1	Kidney-	1.50828	-1.0205	25.7202	1.13725	-1.55154	5.80075
Igsf5	1	Kidney-	1.07473	-1.11224	25.2098	-1.48135	-1.08824	-1.10557
Ripk4	1	Kidney-	-1.23279	1.03021	25.2076	-1.75827	1.32194	1.55721
Kcnk1	1	Kidney-	5.85303	1.34908	25.0229	1.52281	1.9295	3.80622
Blnk	1	Kidney-	2.10685	-1.47836	24.2536	2.90963	-1.27823	-1.48125
Bspry	1	Kidney-	2.02943	1.7626	24.2221	1.12175	1.29093	1.16392
Lamc2	1	Kidney-	1.71334	2.14284	24.2105	2.35325	3.00861	8.64038
Cldn6	1	Kidney-	1.07348	-1.03254	21.4307	-2.17822	-1.39764	-1.20601
Sfn	1	Kidney-	1.89792	1.33971	21.0675	2.00086	1.73629	4.2175
Vmn2r78	1	Kidney-	7.73477	1.84557	20.819	2.09586	4.19621	1.88759
Bex1	1	Kidney-	1.76558	-1.54999	20.3451	1.23046	-1.41119	1.67522
Kcnj16	1	Kidney-	1.64006	1.40506	19.1908	1.12734	1.01884	1.12637
Il11	1	Kidney-	-4.59248	-9.98653	18.0551	-1.27535	-1.4145	6.10687
Myh14	1	Kidney-	2.27514	3.09207	17.7919	1.33316	3.13537	1.73415
Wnt7b	1	Kidney-	2.16984	1.34324	17.4885	2.59087	1.3085	1.1885
Crct1	1	Kidney-	5.02667	2.97589	17.0016	4.06993	3.077	4.63127
St14	1	Kidney-	-1.62523	-1.27355	16.6324	-1.55765	-1.38199	-1.3094
BC021767	1	Kidney-	2.29092	2.68773	16.5392	1.99548	3.40392	-1.62308
Hkdc1	1	Kidney-	2.02675	1.78474	16.536	1.58376	1.72692	2.03643
Pmaip1	1	Kidney-	2.77681	-3.3834	15.4786	1.87792	1.33396	3.03855
Ppm1j	1	Kidney-	3.13961	3.37192	15.4698	8.42431	4.4947	7.16173
Cyfip2	1	Kidney-	4.29406	-1.11009	15.329	7.72756	5.90625	1.11412
Cd24a	1	Kidney-	-1.04758	-22.2629	14.9733	4.20802	6.57262	-2.02936
Sema4d	1	Kidney-	1.93576	2.65481	14.9272	9.19075	3.28358	3.12913
5730559C18Rik	1	Kidney-	1.66475	-1.00527	14.5569	4.63764	4.13719	8.96278
Tnni2	1	Kidney-	1.85161	1.98075	14.497	1.79973	1.13204	2.1785
Il5ra	1	Kidney-	-1.20335	-1.09744	14.2447	-2.10127	-2.5688	-1.25722
Eppk1	1	Kidney-	3.58144	-1.31033	13.7625	5.02837	3.86027	2.89742
Fut1	1	Kidney-	1.70302	1.39753	13.7017	2.26028	4.46159	2.49335
Gprc5a	1	Kidney-	-1.90998	1.3505	13.1082	2.24728	2.34755	-1.39832
Cdh10	1	Kidney-	1.76301	1.47829	13.1047	1.23387	1.38479	1.65833
Csf3	1	Kidney-	1.77246	4.74685	13.0342	2.73541	1.3257	2.43959
Hoxc5	1	Kidney-	2.61707	-2.20165	12.9958	1.20757	-1.03619	2.79662
Gdf15	1	Kidney-	1.29509	3.88773	12.8879	2.81997	1.66825	1.14398
Spint1	1	Kidney-	-1.31676	1.00177	12.8695	-1.90074	-1.19792	-1.40406
Il18r1	1	Kidney-	1.17175	1.60159	12.8686	1.1883	5.69895	1.14358
Paqr5	1	Kidney-	1.99597	1.999	12.6951	2.30587	1.56639	1.77135
Sdcbp2	1	Kidney-	1.74303	1.2551	12.6442	7.64661	2.8323	3.04567
Ctsw	1	Kidney-	2.19888	1.45605	12.4248	1.19579	1.22478	3.82884
Rgs16	1	Kidney-	1.83035	2.34878	12.4171	4.01895	1.7767	9.22983
Ttc9	1	Kidney-	2.14222	3.17952	12.2625	3.00626	1.47375	1.2902
Cck	1	Kidney-	1.48522	-114.636	12.0954	-1.01096	6.5507	4.57292
Fermt1	1	Kidney-	1.45443	1.33256	11.9764	1.13887	-1.15328	1.66978
Ano9	1	Kidney-	-1.10506	1.14169	11.9662	-1.17526	-1.40124	1.12927
Nup210	1	Kidney-	2.02845	1.95534	11.9619	2.75683	2.42443	1.49357
Tmem179	1	Kidney-	1.52869	-1.43318	11.5723	6.0638	1.83989	4.17406
Cblc	1	Kidney-	-1.16709	1.00355	11.5099	-1.78515	-1.67685	-1.27588
Itga3	1	Kidney-	2.46143	-1.18248	11.454	2.75621	2.17477	-1.82773
Muc20	1	Kidney-	1.95024	1.90516	11.1728	2.34307	2.49173	1.63082
Itgb6	1	Kidney-	1.12692	1.38576	11.1531	1.01375	2.32176	1.161
Slc4a11	1	Kidney-	-2.90043	-3.26504	11.1521	-1.70041	-1.45399	-1.69838
Macc1	1	Kidney-	2.03422	2.35822	10.8892	1.42005	1.68141	1.49516
Il1f6	1	Kidney-	1.69853	1.38404	10.8576	1.00668	1.00202	1.06452
Epcam	1	Kidney-	-1.28224	1.30226	10.691	-2.04355	-1.8911	1.0272
Nts	1	Kidney-	5.2129	1.75955	10.5322	6.21489	-1.71599	-1.1469
Mmd	1	Kidney-	9.39395	-2.46433	10.4494	5.63233	5.80485	4.27144
P2rx2	1	Kidney-	8.61488	1.41329	10.4307	6.91041	2.21176	3.18481
Tfcp2l1	1	Kidney-	3.27405	1.26671	10.3745	2.28721	2.81969	-1.65234
Slc22a23	1	Kidney-	9.45366	1.49327	10.3392	4.96571	4.47115	2.18291
Marveld2	1	Kidney-	2.11766	1.67482	10.2373	4.42771	1.70583	1.62065
Spaca7	1	Kidney-	-1.327	-1.85558	10.1354	-1.57562	-2.75069	-1.8736
Elf3	1	Kidney-	2.7857	2.29631	10.112	1.82702	1.66292	1.47058
H2-M1	1	Kidney-	1.58104	-1.59493	10.0843	-1.26451	-1.98625	2.58233
Spata4	1	Kidney-	1.2909	2.6739	10.0795	-1.86248	-2.05628	-1.27399

## Sheet: HeartOnly
GeneSymbol	organ number	organ combo	Gonad	Heart	Kidney	Liver	Lung	Skin
Tbx20	1	Heart-	1.25185	145.665	1.8245	6.89246	2.22642	-1.1544
Wfdc18	1	Heart-	3.54592	120.126	1.79149	1.2696	4.67543	1.93335
Rhox5	1	Heart-	1.95615	94.4532	7.51064	4.6976	1.93558	1.71317
Frzb	1	Heart-	2.5711	60.3085	-1.88948	4.88626	2.97029	2.03825
Oas2	1	Heart-	-1.43156	52.3184	-4.22065	-1.20494	-2.1029	-2.57847
Fndc1	1	Heart-	-1.49872	47.7367	-3.74391	5.38503	4.19324	3.73453
Hsd11b1	1	Heart-	-1.23378	36.8666	-2.2165	1.02639	-1.40544	1.19594
6030408B16Rik	1	Heart-	3.66245	33.5573	-1.673	-1.01286	2.08204	2.03251
Aspg	1	Heart-	-1.24274	30.5227	-1.00571	1.43579	4.74278	9.03915
Sucnr1	1	Heart-	4.29384	23.9958	1.19601	4.14371	1.59932	1.27992
Fxyd6	1	Heart-	3.22789	20.9065	-1.96606	8.86511	3.45794	5.28437
Oas1a	1	Heart-	-15.2309	20.8124	-5.87035	-2.03521	-4.22764	1.30381
Ly6k	1	Heart-	3.59535	20.4563	1.13295	4.59723	1.99036	3.04467
Tgtp2	1	Heart-	3.1712	20.0626	-2.98677	2.88115	3.54169	-1.13656
Gucy1a3	1	Heart-	6.15543	19.3734	-1.43466	2.79376	4.46431	-3.71079
Itga4	1	Heart-	4.9154	19.2324	2.93457	7.26371	2.95855	4.02753
Msc	1	Heart-	3.89326	18.7668	1.61819	1.75347	1.2382	1.53146
Serpina3n	1	Heart-	2.38317	17.2716	-16.8856	2.02868	4.85609	1.26816
Rasgef1c	1	Heart-	2.50736	16.0089	2.37378	3.52656	4.31473	4.5445
Mfsd2a	1	Heart-	6.84449	15.7998	1.71311	5.55408	3.18384	3.63659
Mfap4	1	Heart-	1.458	15.2893	1.40084	-1.13378	2.43831	1.71585
Phf11b	1	Heart-	-3.87265	14.418	-8.24358	-1.19072	-1.57718	-3.32218
Fmo1	1	Heart-	7.81364	14.3418	1.05169	8.3159	3.22008	1.98295
Oas1f	1	Heart-	-3.97177	14.2066	-3.85321	-1.28458	-1.56878	1.13791
Apcdd1	1	Heart-	3.50565	13.3755	-1.16572	4.41213	4.60488	7.54244
Pigz	1	Heart-	2.90627	13.2497	2.89979	6.80833	3.94728	1.94481
Bmx	1	Heart-	1.4229	13.1471	-2.87386	5.9343	3.50319	1.02072
Oasl1	1	Heart-	-1.14148	13.1441	5.31505	-1.67551	-1.16111	-1.10664
Zbp1	1	Heart-	-5.2208	12.9193	-2.88827	-4.65331	-2.17112	-1.37408
Mmp3	1	Heart-	-5.46297	12.8183	-6.782	5.10252	9.69805	5.98102
Col2a1	1	Heart-	-13.3489	12.7797	-12.1053	-3.52846	-3.43388	-14.7399
Csprs	1	Heart-	1.81056	12.2463	1.48747	1.94654	1.53879	1.86507
Rcsd1	1	Heart-	4.80468	12.1191	2.86971	4.47088	2.14238	-2.79824
Sh3tc2	1	Heart-	8.0832	12.0336	2.17031	9.58557	6.59129	1.31871
Cmpk2	1	Heart-	1.08711	11.7408	-1.30399	1.20619	1.2737	-1.51314
Pnp2	1	Heart-	1.65264	11.3139	-1.09743	8.22067	8.67055	6.97795
Abca8b	1	Heart-	-1.85603	11.0098	-4.57343	2.2834	2.95456	-1.76564
Olfml1	1	Heart-	-1.77326	10.9239	-2.03012	-3.3701	1.11713	-3.57318
Gpm6b	1	Heart-	1.11297	10.6891	-8.83286	1.09795	3.28822	7.8942
Gm10824	1	Heart-	5.47227	10.4633	4.23745	4.12158	5.96837	-1.09883
Gucy1b3	1	Heart-	1.70321	10.463	1.10091	2.40896	1.99504	-1.27068
Dlg2	1	Heart-	2.25276	10.2593	1.88444	7.61117	1.85247	5.92709

## Sheet: GonadOnly
GeneSymbol	organ number	organ combo	Gonad	Heart	Kidney	Liver	Lung	Skin
Arx	1	Gonad-	1713.23	2.36109	3.16254	1.81594	1.69315	2.13244
Casq2	1	Gonad-	95.3067	2.31554	1.82419	6.6667	1.07182	1.08495
Akr1c14	1	Gonad-	41.0671	3.41206	-1.54083	3.94983	3.14348	-1.72085
Nr5a1	1	Gonad-	36.0363	-1.20304	2.04106	-1.23765	-1.13307	-1.12556
Cldn11	1	Gonad-	32.2612	5.56687	2.33774	2.32694	2.52976	1.99271
Hoxd10	1	Gonad-	26.096	-1.14664	5.69203	2.0257	-1.82191	-1.51842
Defb42	1	Gonad-	23.1889	1.09189	2.61886	2.36695	4.07912	1.23886
Gm5067	1	Gonad-	22.6671	2.40372	2.10789	9.19782	3.78376	1.89361
Clic5	1	Gonad-	21.5731	-2.71114	-1.07876	3.83789	3.83386	-4.3825
Tex14	1	Gonad-	20.444	1.59429	3.59117	2.24971	2.70527	1.14474
Aard	1	Gonad-	20.318	-2.4969	-5.53038	1.31411	-1.38794	-4.67367
Sorcs1	1	Gonad-	20.175	1.9536	1.17647	5.60274	2.63938	2.2097
Vmn1r65	1	Gonad-	19.4623	3.30989	1.79035	-1.08992	1.67357	-1.03574
6330509M05Rik	1	Gonad-	18.912	9.25791	3.00791	8.91777	2.44326	1.00152
Map2	1	Gonad-	18.6418	3.6231	1.1607	1.65105	1.17647	-1.08887
Mrap	1	Gonad-	18.4177	6.34322	5.94336	3.29977	2.14322	1.94419
Col15a1	1	Gonad-	17.8329	4.54511	3.03087	8.12861	2.32254	4.84297
Akr1cl	1	Gonad-	17.7694	1.3341	1.64937	1.04908	-1.04487	-1.14181
Fam84b	1	Gonad-	16.256	3.917	6.23225	9.34764	9.24653	5.83642
Dner	1	Gonad-	15.8958	-2.62395	-3.00369	1.25774	1.91479	-2.43804
Col11a1	1	Gonad-	15.5084	2.24702	-2.32033	4.47722	3.89033	1.53575
2210011C24Rik	1	Gonad-	15.2522	1.24296	2.39253	4.97924	2.90032	-2.29831
Htra1	1	Gonad-	14.6172	4.24599	2.37447	4.96229	4.72259	5.59872
Lhx9	1	Gonad-	14.5253	1.53439	6.10884	1.20326	2.1014	-1.18261
Efhd1	1	Gonad-	13.7426	-1.11406	4.33606	-1.56042	-2.01423	-2.44373
Kcnab3	1	Gonad-	13.3075	-1.53522	1.25765	2.5282	2.13876	1.53786
Speer8-ps1	1	Gonad-	13.2224	-1.18554	-1.47998	2.97966	1.31928	-2.64812
Lrtm2	1	Gonad-	11.562	1.88978	8.80544	1.68234	4.2092	2.68157
Serpinb9	1	Gonad-	11.4149	1.51016	-2.4794	3.47708	6.58889	1.49426
Sh3bgr	1	Gonad-	11.244	-3.60434	1.54545	6.13592	5.46909	-1.22673
C77370	1	Gonad-	11.1928	2.93663	3.65495	1.53983	-1.64223	-1.13837
Kank4	1	Gonad-	10.9798	1.89247	1.47138	1.58699	-1.05699	1.13153
Chst3	1	Gonad-	10.8694	1.4217	1.79765	1.98342	1.16592	-1.13479
Hoxd3	1	Gonad-	10.7655	2.22268	3.60856	2.43117	1.02748	3.05169
Ano4	1	Gonad-	10.5184	2.80372	2.97262	3.67048	1.2415	1.10967
Col4a1	1	Gonad-	10.2245	6.12169	3.68222	6.56912	3.92541	2.50361
Hopx	1	Gonad-	10.2124	-1.88268	-2.11608	3.0523	3.38265	1.43
Cyp11a1	1	Gonad-	10.1608	1.44346	3.12173	1.44718	1.31895	1.21218
P2ry6	1	Gonad-	10.0214	-1.24973	-11.4723	1.83315	1.40469	-2.17041
