# Supplementary material for: Adult mouse fibroblasts retain organ-specific transcriptomic identity
Source: eLife. 2022 Mar 16;11:e71008. doi: 10.7554/eLife.71008 (PMC8959603; doi:10.7554/eLife.71008)
Supplement: Figure 4—source data 1. [file elife-71008-fig4-data1.xlsx]

## Sheet: NeontalHeart 
p_val	avg_logFC	pct.1	pct.2	p_val_adj	gene	orig.ident	cluster
1.1712e-09	1.40902	0.26	0.121	3.64546e-05	Hspa1a	D28	NeontalHeart
5.43277e-23	0.739565	0.689	0.394	1.691e-18	Gm11808	D28	NeontalHeart
2.09286e-18	0.692297	0.598	0.307	6.51424e-14	Serinc3	D28	NeontalHeart
2.63119e-12	0.662702	0.324	0.118	8.18986e-08	Cebpb	D28	NeontalHeart
3.939e-07	0.574446	0.457	0.284	0.0122605	Dnajb1	D28	NeontalHeart
1.75274e-24	0.555364	0.89	0.705	5.45559e-20	Rpl13a	D28	NeontalHeart
4.10764e-09	0.529711	0.584	0.377	0.000127854	Hspa5	D28	NeontalHeart
1.28721e-10	0.517132	0.658	0.429	4.00658e-06	Mgp	D28	NeontalHeart
1.00769e-06	0.496229	0.717	0.56	0.0313654	Hsp90aa1	D28	NeontalHeart
5.58275e-18	0.484766	0.95	0.817	1.73769e-13	Hspa8	D28	NeontalHeart
8.08604e-06	0.464499	0.352	0.201	0.251686	Fabp4	D28	NeontalHeart
1.19069e-11	0.462253	0.703	0.455	3.70615e-07	Dnaja1	D28	NeontalHeart
4.79427e-06	0.4304	0.274	0.135	0.149226	Rpl27-ps3	D28	NeontalHeart
1.69163e-07	0.399947	0.329	0.163	0.00526538	Cacybp	D28	NeontalHeart
1.31366e-06	0.394726	0.47	0.289	0.040889	Hnrnpu	D28	NeontalHeart
1.40976e-07	0.393232	0.342	0.175	0.004388	Pcbp1	D28	NeontalHeart
0.0325479	0.387255	0.361	0.275	1	Jun	D28	NeontalHeart
5.46718e-05	0.375466	0.648	0.513	1	Gm31243	D28	NeontalHeart
6.65474e-07	0.368298	0.402	0.229	0.0207136	Add3	D28	NeontalHeart
7.87352e-05	0.367714	0.274	0.153	1	Stt3b	D28	NeontalHeart
7.16368e-06	0.360774	0.507	0.334	0.222977	Lcp1	D28	NeontalHeart
0.000126643	0.359979	0.301	0.177	1	Hspd1	D28	NeontalHeart
3.39201e-06	0.357323	0.58	0.398	0.10558	Cd83	D28	NeontalHeart
0.000124237	0.353941	0.274	0.155	1	Pi16	D28	NeontalHeart
1.01757e-07	0.353314	0.425	0.238	0.00316729	Eif4g2	D28	NeontalHeart
6.74351e-05	0.351202	0.301	0.17	1	Txnip	D28	NeontalHeart
0.000416423	0.351088	0.393	0.261	1	Satb1	D28	NeontalHeart
1.64082e-05	0.340142	0.256	0.129	0.510722	Canx	D28	NeontalHeart
8.36171e-07	0.332938	0.744	0.562	0.0260267	Dcn	D28	NeontalHeart
1.30836e-19	0.33183	0.936	0.936	4.07239e-15	Rps28	D28	NeontalHeart
3.16075e-07	0.331404	0.598	0.4	0.00983815	Snrpg	D28	NeontalHeart
0.00313076	0.33065	0.338	0.229	1	Vps37b	D28	NeontalHeart
6.81656e-05	0.329197	0.256	0.137	1	Smarca5	D28	NeontalHeart
1.12872e-06	0.327902	0.411	0.242	0.0351325	Fam107b	D28	NeontalHeart
2.82425e-10	0.322883	0.858	0.647	8.79077e-06	Rsrp1	D28	NeontalHeart
6.38227e-06	0.322544	0.699	0.524	0.198654	Cst3	D28	NeontalHeart
0.000223115	0.315878	0.26	0.145	1	Selenop	D28	NeontalHeart
6.68774e-06	0.314664	0.265	0.135	0.208163	Lum	D28	NeontalHeart
1.90451e-06	0.302972	0.347	0.195	0.0592797	Ahsa1	D28	NeontalHeart
7.89442e-05	0.290498	0.374	0.235	1	Selenof	D28	NeontalHeart
0.000403552	0.288274	0.868	0.785	1	Hsp90ab1	D28	NeontalHeart
1.83297e-07	0.282638	0.918	0.916	0.00570531	Btg1	D28	NeontalHeart
8.96673e-05	0.282636	0.393	0.258	1	Atp6v0b	D28	NeontalHeart
4.07e-05	0.27751	0.324	0.195	1	Nop56	D28	NeontalHeart
2.56632e-05	0.276233	0.406	0.258	0.798794	Cct5	D28	NeontalHeart
7.29606e-05	0.273122	0.283	0.163	1	Srsf7	D28	NeontalHeart
0.0072239	0.268298	0.274	0.182	1	Cd22	D28	NeontalHeart
0.000904292	0.267852	0.306	0.192	1	Nfkbid	D28	NeontalHeart
7.48598e-05	0.267652	0.397	0.258	1	Sfpq	D28	NeontalHeart
0.000692763	0.267622	0.301	0.189	1	Tmed5	D28	NeontalHeart
0.0138429	0.264479	0.269	0.182	1	Atp2b1	D28	NeontalHeart
0.014434	0.261599	0.352	0.255	1	Tmod3	D28	NeontalHeart
0.00822382	0.260913	0.406	0.301	1	Calr	D28	NeontalHeart
5.11941e-05	0.254281	0.251	0.142	1	Prpf4b	D28	NeontalHeart
2.32049e-14	0.253798	0.936	0.961	7.22276e-10	Rpl35	D28	NeontalHeart
0.0028878	0.253576	0.26	0.162	1	Chmp2a	D28	NeontalHeart
0.000777801	0.252279	0.616	0.483	1	Atp5b	D28	NeontalHeart
0.000991431	0.252006	0.397	0.273	1	Tax1bp1	D28	NeontalHeart
8.46698e-06	-0.251741	0.808	0.845	0.263543	Rpl29	D28	NeontalHeart
3.46646e-08	-0.253192	0.941	0.967	0.00107897	Rpl18	D28	NeontalHeart
2.91291e-06	-0.253801	0.936	0.944	0.0906673	Rpl7	D28	NeontalHeart
6.94415e-05	-0.258749	0.311	0.334	1	Arhgdia	D28	NeontalHeart
4.57757e-05	-0.260205	0.352	0.383	1	Atp5g2	D28	NeontalHeart
1.14903e-12	-0.26041	0.941	0.992	3.57646e-08	Rps16	D28	NeontalHeart
0.0143106	-0.260685	0.237	0.289	1	Mtdh	D28	NeontalHeart
6.44289e-08	-0.263878	0.881	0.865	0.00200541	Cd52	D28	NeontalHeart
1.38181e-09	-0.271081	0.963	0.981	4.30102e-05	Rpl27a	D28	NeontalHeart
2.12209e-08	-0.276488	0.922	0.965	0.000660522	Rps25	D28	NeontalHeart
1.37316e-05	-0.278315	0.566	0.615	0.42741	Cox7a2l	D28	NeontalHeart
4.69298e-08	-0.27861	0.9	0.931	0.00146074	Rpl10a	D28	NeontalHeart
2.00799e-12	-0.281745	0.959	0.983	6.25006e-08	Rpl26	D28	NeontalHeart
2.26117e-18	-0.283495	0.959	0.998	7.03813e-14	Fau	D28	NeontalHeart
1.29576e-11	-0.291575	0.95	0.987	4.03317e-07	Rps8	D28	NeontalHeart
3.42122e-08	-0.294441	0.895	0.953	0.00106489	Ly6e	D28	NeontalHeart
4.35195e-05	-0.301725	0.557	0.63	1	Uqcrh	D28	NeontalHeart
3.93327e-07	-0.302223	0.927	0.951	0.0122427	Actb	D28	NeontalHeart
1.05593e-10	-0.306076	0.932	0.972	3.28667e-06	Rps20	D28	NeontalHeart
3.68813e-14	-0.307739	0.959	0.987	1.14797e-09	Rps9	D28	NeontalHeart
4.76174e-11	-0.310685	0.922	0.962	1.48214e-06	Rpsa	D28	NeontalHeart
0.00531794	-0.315411	0.192	0.258	1	Tspan32	D28	NeontalHeart
1.0732e-09	-0.31684	0.881	0.927	3.34045e-05	Rps17	D28	NeontalHeart
1.10541e-12	-0.316873	0.936	0.987	3.4407e-08	Rps4x	D28	NeontalHeart
1.33326e-08	-0.317041	0.781	0.807	0.000414991	Rpl5	D28	NeontalHeart
1.84735e-17	-0.317055	0.945	0.993	5.75005e-13	Rps24	D28	NeontalHeart
1.81118e-11	-0.317531	0.89	0.92	5.63749e-07	Rpl30	D28	NeontalHeart
0.0435416	-0.317847	0.324	0.366	1	Ifi27l2a	D28	NeontalHeart
3.20694e-15	-0.318579	0.95	0.99	9.98191e-11	Rpl21	D28	NeontalHeart
3.13106e-15	-0.321534	0.963	0.987	9.74572e-11	Rps3a1	D28	NeontalHeart
6.98276e-16	-0.323379	0.95	0.989	2.17345e-11	Rpl19	D28	NeontalHeart
3.4966e-05	-0.325738	0.251	0.304	1	Cirbp	D28	NeontalHeart
2.64967e-15	-0.328691	0.932	0.984	8.24737e-11	Rpl8	D28	NeontalHeart
4.48688e-15	-0.328823	0.941	0.981	1.39659e-10	Rps27a	D28	NeontalHeart
3.10851e-15	-0.332496	0.95	0.984	9.67554e-11	Rps15	D28	NeontalHeart
4.73011e-15	-0.332904	0.95	0.985	1.47229e-10	Rps3	D28	NeontalHeart
2.24982e-15	-0.33952	0.959	0.965	7.0028e-11	Rplp1	D28	NeontalHeart
2.0692e-07	-0.342855	0.53	0.585	0.00644058	Eef1b2	D28	NeontalHeart
9.55151e-17	-0.345682	0.927	0.988	2.973e-12	Rps13	D28	NeontalHeart
8.52031e-16	-0.351128	0.954	0.99	2.65203e-11	Eef1a1	D28	NeontalHeart
6.27127e-10	-0.358712	0.735	0.793	1.952e-05	Rack1	D28	NeontalHeart
0.000142272	-0.3669	0.292	0.397	1	Ppdpf	D28	NeontalHeart
4.7038e-16	-0.367379	0.913	0.984	1.46411e-11	Rpl23	D28	NeontalHeart
7.72415e-10	-0.377181	0.767	0.829	2.40422e-05	Sh3bgrl3	D28	NeontalHeart
4.33367e-11	-0.377803	0.936	0.966	1.3489e-06	Tpt1	D28	NeontalHeart
0.000175711	-0.390388	0.178	0.273	1	AY036118	D28	NeontalHeart
4.81048e-06	-0.420668	0.274	0.382	0.149731	Gm42418	D28	NeontalHeart
7.65749e-07	-0.451986	0.215	0.296	0.0238347	Gm10076	D28	NeontalHeart
2.95757e-16	-0.454716	0.84	0.912	9.20573e-12	Rps12	D28	NeontalHeart
7.45506e-24	-0.547601	0.872	0.921	2.32046e-19	Rpl12	D28	NeontalHeart

## Sheet: LungA 
p_val	avg_logFC	pct.1	pct.2	p_val_adj	gene	orig.ident	cluster
1.1712e-09	1.40902	0.26	0.121	3.64546e-05	Hspa1a	D28	LungA
5.43277e-23	0.739565	0.689	0.394	1.691e-18	Gm11808	D28	LungA
2.09286e-18	0.692297	0.598	0.307	6.51424e-14	Serinc3	D28	LungA
2.63119e-12	0.662702	0.324	0.118	8.18986e-08	Cebpb	D28	LungA
3.939e-07	0.574446	0.457	0.284	0.0122605	Dnajb1	D28	LungA
1.75274e-24	0.555364	0.89	0.705	5.45559e-20	Rpl13a	D28	LungA
4.10764e-09	0.529711	0.584	0.377	0.000127854	Hspa5	D28	LungA
1.28721e-10	0.517132	0.658	0.429	4.00658e-06	Mgp	D28	LungA
1.00769e-06	0.496229	0.717	0.56	0.0313654	Hsp90aa1	D28	LungA
5.58275e-18	0.484766	0.95	0.817	1.73769e-13	Hspa8	D28	LungA
8.08604e-06	0.464499	0.352	0.201	0.251686	Fabp4	D28	LungA
1.19069e-11	0.462253	0.703	0.455	3.70615e-07	Dnaja1	D28	LungA
4.79427e-06	0.4304	0.274	0.135	0.149226	Rpl27-ps3	D28	LungA
1.69163e-07	0.399947	0.329	0.163	0.00526538	Cacybp	D28	LungA
1.31366e-06	0.394726	0.47	0.289	0.040889	Hnrnpu	D28	LungA
1.40976e-07	0.393232	0.342	0.175	0.004388	Pcbp1	D28	LungA
0.0325479	0.387255	0.361	0.275	1	Jun	D28	LungA
5.46718e-05	0.375466	0.648	0.513	1	Gm31243	D28	LungA
6.65474e-07	0.368298	0.402	0.229	0.0207136	Add3	D28	LungA
7.87352e-05	0.367714	0.274	0.153	1	Stt3b	D28	LungA
7.16368e-06	0.360774	0.507	0.334	0.222977	Lcp1	D28	LungA
0.000126643	0.359979	0.301	0.177	1	Hspd1	D28	LungA
3.39201e-06	0.357323	0.58	0.398	0.10558	Cd83	D28	LungA
0.000124237	0.353941	0.274	0.155	1	Pi16	D28	LungA
1.01757e-07	0.353314	0.425	0.238	0.00316729	Eif4g2	D28	LungA
6.74351e-05	0.351202	0.301	0.17	1	Txnip	D28	LungA
0.000416423	0.351088	0.393	0.261	1	Satb1	D28	LungA
1.64082e-05	0.340142	0.256	0.129	0.510722	Canx	D28	LungA
8.36171e-07	0.332938	0.744	0.562	0.0260267	Dcn	D28	LungA
1.30836e-19	0.33183	0.936	0.936	4.07239e-15	Rps28	D28	LungA
3.16075e-07	0.331404	0.598	0.4	0.00983815	Snrpg	D28	LungA
0.00313076	0.33065	0.338	0.229	1	Vps37b	D28	LungA
6.81656e-05	0.329197	0.256	0.137	1	Smarca5	D28	LungA
1.12872e-06	0.327902	0.411	0.242	0.0351325	Fam107b	D28	LungA
2.82425e-10	0.322883	0.858	0.647	8.79077e-06	Rsrp1	D28	LungA
6.38227e-06	0.322544	0.699	0.524	0.198654	Cst3	D28	LungA
0.000223115	0.315878	0.26	0.145	1	Selenop	D28	LungA
6.68774e-06	0.314664	0.265	0.135	0.208163	Lum	D28	LungA
1.90451e-06	0.302972	0.347	0.195	0.0592797	Ahsa1	D28	LungA
7.89442e-05	0.290498	0.374	0.235	1	Selenof	D28	LungA
0.000403552	0.288274	0.868	0.785	1	Hsp90ab1	D28	LungA
1.83297e-07	0.282638	0.918	0.916	0.00570531	Btg1	D28	LungA
8.96673e-05	0.282636	0.393	0.258	1	Atp6v0b	D28	LungA
4.07e-05	0.27751	0.324	0.195	1	Nop56	D28	LungA
2.56632e-05	0.276233	0.406	0.258	0.798794	Cct5	D28	LungA
7.29606e-05	0.273122	0.283	0.163	1	Srsf7	D28	LungA
0.0072239	0.268298	0.274	0.182	1	Cd22	D28	LungA
0.000904292	0.267852	0.306	0.192	1	Nfkbid	D28	LungA
7.48598e-05	0.267652	0.397	0.258	1	Sfpq	D28	LungA
0.000692763	0.267622	0.301	0.189	1	Tmed5	D28	LungA
0.0138429	0.264479	0.269	0.182	1	Atp2b1	D28	LungA
0.014434	0.261599	0.352	0.255	1	Tmod3	D28	LungA
0.00822382	0.260913	0.406	0.301	1	Calr	D28	LungA
5.11941e-05	0.254281	0.251	0.142	1	Prpf4b	D28	LungA
2.32049e-14	0.253798	0.936	0.961	7.22276e-10	Rpl35	D28	LungA
0.0028878	0.253576	0.26	0.162	1	Chmp2a	D28	LungA
0.000777801	0.252279	0.616	0.483	1	Atp5b	D28	LungA
0.000991431	0.252006	0.397	0.273	1	Tax1bp1	D28	LungA
8.46698e-06	-0.251741	0.808	0.845	0.263543	Rpl29	D28	LungA
3.46646e-08	-0.253192	0.941	0.967	0.00107897	Rpl18	D28	LungA
2.91291e-06	-0.253801	0.936	0.944	0.0906673	Rpl7	D28	LungA
6.94415e-05	-0.258749	0.311	0.334	1	Arhgdia	D28	LungA
4.57757e-05	-0.260205	0.352	0.383	1	Atp5g2	D28	LungA
1.14903e-12	-0.26041	0.941	0.992	3.57646e-08	Rps16	D28	LungA
0.0143106	-0.260685	0.237	0.289	1	Mtdh	D28	LungA
6.44289e-08	-0.263878	0.881	0.865	0.00200541	Cd52	D28	LungA
1.38181e-09	-0.271081	0.963	0.981	4.30102e-05	Rpl27a	D28	LungA
2.12209e-08	-0.276488	0.922	0.965	0.000660522	Rps25	D28	LungA
1.37316e-05	-0.278315	0.566	0.615	0.42741	Cox7a2l	D28	LungA
4.69298e-08	-0.27861	0.9	0.931	0.00146074	Rpl10a	D28	LungA
2.00799e-12	-0.281745	0.959	0.983	6.25006e-08	Rpl26	D28	LungA
2.26117e-18	-0.283495	0.959	0.998	7.03813e-14	Fau	D28	LungA
1.29576e-11	-0.291575	0.95	0.987	4.03317e-07	Rps8	D28	LungA
3.42122e-08	-0.294441	0.895	0.953	0.00106489	Ly6e	D28	LungA
4.35195e-05	-0.301725	0.557	0.63	1	Uqcrh	D28	LungA
3.93327e-07	-0.302223	0.927	0.951	0.0122427	Actb	D28	LungA
1.05593e-10	-0.306076	0.932	0.972	3.28667e-06	Rps20	D28	LungA
3.68813e-14	-0.307739	0.959	0.987	1.14797e-09	Rps9	D28	LungA
4.76174e-11	-0.310685	0.922	0.962	1.48214e-06	Rpsa	D28	LungA
0.00531794	-0.315411	0.192	0.258	1	Tspan32	D28	LungA
1.0732e-09	-0.31684	0.881	0.927	3.34045e-05	Rps17	D28	LungA
1.10541e-12	-0.316873	0.936	0.987	3.4407e-08	Rps4x	D28	LungA
1.33326e-08	-0.317041	0.781	0.807	0.000414991	Rpl5	D28	LungA
1.84735e-17	-0.317055	0.945	0.993	5.75005e-13	Rps24	D28	LungA
1.81118e-11	-0.317531	0.89	0.92	5.63749e-07	Rpl30	D28	LungA
0.0435416	-0.317847	0.324	0.366	1	Ifi27l2a	D28	LungA
3.20694e-15	-0.318579	0.95	0.99	9.98191e-11	Rpl21	D28	LungA
3.13106e-15	-0.321534	0.963	0.987	9.74572e-11	Rps3a1	D28	LungA
6.98276e-16	-0.323379	0.95	0.989	2.17345e-11	Rpl19	D28	LungA
3.4966e-05	-0.325738	0.251	0.304	1	Cirbp	D28	LungA
2.64967e-15	-0.328691	0.932	0.984	8.24737e-11	Rpl8	D28	LungA
4.48688e-15	-0.328823	0.941	0.981	1.39659e-10	Rps27a	D28	LungA
3.10851e-15	-0.332496	0.95	0.984	9.67554e-11	Rps15	D28	LungA
4.73011e-15	-0.332904	0.95	0.985	1.47229e-10	Rps3	D28	LungA
2.24982e-15	-0.33952	0.959	0.965	7.0028e-11	Rplp1	D28	LungA
2.0692e-07	-0.342855	0.53	0.585	0.00644058	Eef1b2	D28	LungA
9.55151e-17	-0.345682	0.927	0.988	2.973e-12	Rps13	D28	LungA
8.52031e-16	-0.351128	0.954	0.99	2.65203e-11	Eef1a1	D28	LungA
6.27127e-10	-0.358712	0.735	0.793	1.952e-05	Rack1	D28	LungA
0.000142272	-0.3669	0.292	0.397	1	Ppdpf	D28	LungA
4.7038e-16	-0.367379	0.913	0.984	1.46411e-11	Rpl23	D28	LungA
7.72415e-10	-0.377181	0.767	0.829	2.40422e-05	Sh3bgrl3	D28	LungA
4.33367e-11	-0.377803	0.936	0.966	1.3489e-06	Tpt1	D28	LungA
0.000175711	-0.390388	0.178	0.273	1	AY036118	D28	LungA
4.81048e-06	-0.420668	0.274	0.382	0.149731	Gm42418	D28	LungA
7.65749e-07	-0.451986	0.215	0.296	0.0238347	Gm10076	D28	LungA
2.95757e-16	-0.454716	0.84	0.912	9.20573e-12	Rps12	D28	LungA
7.45506e-24	-0.547601	0.872	0.921	2.32046e-19	Rpl12	D28	LungA

## Sheet: KidneyA 
p_val	avg_logFC	pct.1	pct.2	p_val_adj	gene	orig.ident	cluster
1.1712e-09	1.40902	0.26	0.121	3.64546e-05	Hspa1a	D28	KidneyA
5.43277e-23	0.739565	0.689	0.394	1.691e-18	Gm11808	D28	KidneyA
2.09286e-18	0.692297	0.598	0.307	6.51424e-14	Serinc3	D28	KidneyA
2.63119e-12	0.662702	0.324	0.118	8.18986e-08	Cebpb	D28	KidneyA
3.939e-07	0.574446	0.457	0.284	0.0122605	Dnajb1	D28	KidneyA
1.75274e-24	0.555364	0.89	0.705	5.45559e-20	Rpl13a	D28	KidneyA
4.10764e-09	0.529711	0.584	0.377	0.000127854	Hspa5	D28	KidneyA
1.28721e-10	0.517132	0.658	0.429	4.00658e-06	Mgp	D28	KidneyA
1.00769e-06	0.496229	0.717	0.56	0.0313654	Hsp90aa1	D28	KidneyA
5.58275e-18	0.484766	0.95	0.817	1.73769e-13	Hspa8	D28	KidneyA
8.08604e-06	0.464499	0.352	0.201	0.251686	Fabp4	D28	KidneyA
1.19069e-11	0.462253	0.703	0.455	3.70615e-07	Dnaja1	D28	KidneyA
4.79427e-06	0.4304	0.274	0.135	0.149226	Rpl27-ps3	D28	KidneyA
1.69163e-07	0.399947	0.329	0.163	0.00526538	Cacybp	D28	KidneyA
1.31366e-06	0.394726	0.47	0.289	0.040889	Hnrnpu	D28	KidneyA
1.40976e-07	0.393232	0.342	0.175	0.004388	Pcbp1	D28	KidneyA
0.0325479	0.387255	0.361	0.275	1	Jun	D28	KidneyA
5.46718e-05	0.375466	0.648	0.513	1	Gm31243	D28	KidneyA
6.65474e-07	0.368298	0.402	0.229	0.0207136	Add3	D28	KidneyA
7.87352e-05	0.367714	0.274	0.153	1	Stt3b	D28	KidneyA
7.16368e-06	0.360774	0.507	0.334	0.222977	Lcp1	D28	KidneyA
0.000126643	0.359979	0.301	0.177	1	Hspd1	D28	KidneyA
3.39201e-06	0.357323	0.58	0.398	0.10558	Cd83	D28	KidneyA
0.000124237	0.353941	0.274	0.155	1	Pi16	D28	KidneyA
1.01757e-07	0.353314	0.425	0.238	0.00316729	Eif4g2	D28	KidneyA
6.74351e-05	0.351202	0.301	0.17	1	Txnip	D28	KidneyA
0.000416423	0.351088	0.393	0.261	1	Satb1	D28	KidneyA
1.64082e-05	0.340142	0.256	0.129	0.510722	Canx	D28	KidneyA
8.36171e-07	0.332938	0.744	0.562	0.0260267	Dcn	D28	KidneyA
1.30836e-19	0.33183	0.936	0.936	4.07239e-15	Rps28	D28	KidneyA
3.16075e-07	0.331404	0.598	0.4	0.00983815	Snrpg	D28	KidneyA
0.00313076	0.33065	0.338	0.229	1	Vps37b	D28	KidneyA
6.81656e-05	0.329197	0.256	0.137	1	Smarca5	D28	KidneyA
1.12872e-06	0.327902	0.411	0.242	0.0351325	Fam107b	D28	KidneyA
2.82425e-10	0.322883	0.858	0.647	8.79077e-06	Rsrp1	D28	KidneyA
6.38227e-06	0.322544	0.699	0.524	0.198654	Cst3	D28	KidneyA
0.000223115	0.315878	0.26	0.145	1	Selenop	D28	KidneyA
6.68774e-06	0.314664	0.265	0.135	0.208163	Lum	D28	KidneyA
1.90451e-06	0.302972	0.347	0.195	0.0592797	Ahsa1	D28	KidneyA
7.89442e-05	0.290498	0.374	0.235	1	Selenof	D28	KidneyA
0.000403552	0.288274	0.868	0.785	1	Hsp90ab1	D28	KidneyA
1.83297e-07	0.282638	0.918	0.916	0.00570531	Btg1	D28	KidneyA
8.96673e-05	0.282636	0.393	0.258	1	Atp6v0b	D28	KidneyA
4.07e-05	0.27751	0.324	0.195	1	Nop56	D28	KidneyA
2.56632e-05	0.276233	0.406	0.258	0.798794	Cct5	D28	KidneyA
7.29606e-05	0.273122	0.283	0.163	1	Srsf7	D28	KidneyA
0.0072239	0.268298	0.274	0.182	1	Cd22	D28	KidneyA
0.000904292	0.267852	0.306	0.192	1	Nfkbid	D28	KidneyA
7.48598e-05	0.267652	0.397	0.258	1	Sfpq	D28	KidneyA
0.000692763	0.267622	0.301	0.189	1	Tmed5	D28	KidneyA
0.0138429	0.264479	0.269	0.182	1	Atp2b1	D28	KidneyA
0.014434	0.261599	0.352	0.255	1	Tmod3	D28	KidneyA
0.00822382	0.260913	0.406	0.301	1	Calr	D28	KidneyA
5.11941e-05	0.254281	0.251	0.142	1	Prpf4b	D28	KidneyA
2.32049e-14	0.253798	0.936	0.961	7.22276e-10	Rpl35	D28	KidneyA
0.0028878	0.253576	0.26	0.162	1	Chmp2a	D28	KidneyA
0.000777801	0.252279	0.616	0.483	1	Atp5b	D28	KidneyA
0.000991431	0.252006	0.397	0.273	1	Tax1bp1	D28	KidneyA
8.46698e-06	-0.251741	0.808	0.845	0.263543	Rpl29	D28	KidneyA
3.46646e-08	-0.253192	0.941	0.967	0.00107897	Rpl18	D28	KidneyA
2.91291e-06	-0.253801	0.936	0.944	0.0906673	Rpl7	D28	KidneyA
6.94415e-05	-0.258749	0.311	0.334	1	Arhgdia	D28	KidneyA
4.57757e-05	-0.260205	0.352	0.383	1	Atp5g2	D28	KidneyA
1.14903e-12	-0.26041	0.941	0.992	3.57646e-08	Rps16	D28	KidneyA
0.0143106	-0.260685	0.237	0.289	1	Mtdh	D28	KidneyA
6.44289e-08	-0.263878	0.881	0.865	0.00200541	Cd52	D28	KidneyA
1.38181e-09	-0.271081	0.963	0.981	4.30102e-05	Rpl27a	D28	KidneyA
2.12209e-08	-0.276488	0.922	0.965	0.000660522	Rps25	D28	KidneyA
1.37316e-05	-0.278315	0.566	0.615	0.42741	Cox7a2l	D28	KidneyA
4.69298e-08	-0.27861	0.9	0.931	0.00146074	Rpl10a	D28	KidneyA
2.00799e-12	-0.281745	0.959	0.983	6.25006e-08	Rpl26	D28	KidneyA
2.26117e-18	-0.283495	0.959	0.998	7.03813e-14	Fau	D28	KidneyA
1.29576e-11	-0.291575	0.95	0.987	4.03317e-07	Rps8	D28	KidneyA
3.42122e-08	-0.294441	0.895	0.953	0.00106489	Ly6e	D28	KidneyA
4.35195e-05	-0.301725	0.557	0.63	1	Uqcrh	D28	KidneyA
3.93327e-07	-0.302223	0.927	0.951	0.0122427	Actb	D28	KidneyA
1.05593e-10	-0.306076	0.932	0.972	3.28667e-06	Rps20	D28	KidneyA
3.68813e-14	-0.307739	0.959	0.987	1.14797e-09	Rps9	D28	KidneyA
4.76174e-11	-0.310685	0.922	0.962	1.48214e-06	Rpsa	D28	KidneyA
0.00531794	-0.315411	0.192	0.258	1	Tspan32	D28	KidneyA
1.0732e-09	-0.31684	0.881	0.927	3.34045e-05	Rps17	D28	KidneyA
1.10541e-12	-0.316873	0.936	0.987	3.4407e-08	Rps4x	D28	KidneyA
1.33326e-08	-0.317041	0.781	0.807	0.000414991	Rpl5	D28	KidneyA
1.84735e-17	-0.317055	0.945	0.993	5.75005e-13	Rps24	D28	KidneyA
1.81118e-11	-0.317531	0.89	0.92	5.63749e-07	Rpl30	D28	KidneyA
0.0435416	-0.317847	0.324	0.366	1	Ifi27l2a	D28	KidneyA
3.20694e-15	-0.318579	0.95	0.99	9.98191e-11	Rpl21	D28	KidneyA
3.13106e-15	-0.321534	0.963	0.987	9.74572e-11	Rps3a1	D28	KidneyA
6.98276e-16	-0.323379	0.95	0.989	2.17345e-11	Rpl19	D28	KidneyA
3.4966e-05	-0.325738	0.251	0.304	1	Cirbp	D28	KidneyA
2.64967e-15	-0.328691	0.932	0.984	8.24737e-11	Rpl8	D28	KidneyA
4.48688e-15	-0.328823	0.941	0.981	1.39659e-10	Rps27a	D28	KidneyA
3.10851e-15	-0.332496	0.95	0.984	9.67554e-11	Rps15	D28	KidneyA
4.73011e-15	-0.332904	0.95	0.985	1.47229e-10	Rps3	D28	KidneyA
2.24982e-15	-0.33952	0.959	0.965	7.0028e-11	Rplp1	D28	KidneyA
2.0692e-07	-0.342855	0.53	0.585	0.00644058	Eef1b2	D28	KidneyA
9.55151e-17	-0.345682	0.927	0.988	2.973e-12	Rps13	D28	KidneyA
8.52031e-16	-0.351128	0.954	0.99	2.65203e-11	Eef1a1	D28	KidneyA
6.27127e-10	-0.358712	0.735	0.793	1.952e-05	Rack1	D28	KidneyA
0.000142272	-0.3669	0.292	0.397	1	Ppdpf	D28	KidneyA
4.7038e-16	-0.367379	0.913	0.984	1.46411e-11	Rpl23	D28	KidneyA
7.72415e-10	-0.377181	0.767	0.829	2.40422e-05	Sh3bgrl3	D28	KidneyA
4.33367e-11	-0.377803	0.936	0.966	1.3489e-06	Tpt1	D28	KidneyA
0.000175711	-0.390388	0.178	0.273	1	AY036118	D28	KidneyA
4.81048e-06	-0.420668	0.274	0.382	0.149731	Gm42418	D28	KidneyA
7.65749e-07	-0.451986	0.215	0.296	0.0238347	Gm10076	D28	KidneyA
2.95757e-16	-0.454716	0.84	0.912	9.20573e-12	Rps12	D28	KidneyA
7.45506e-24	-0.547601	0.872	0.921	2.32046e-19	Rpl12	D28	KidneyA

## Sheet: LungB 
p_val	avg_logFC	pct.1	pct.2	p_val_adj	gene	orig.ident	cluster
1.1712e-09	1.40902	0.26	0.121	3.64546e-05	Hspa1a	D28	LungB
5.43277e-23	0.739565	0.689	0.394	1.691e-18	Gm11808	D28	LungB
2.09286e-18	0.692297	0.598	0.307	6.51424e-14	Serinc3	D28	LungB
2.63119e-12	0.662702	0.324	0.118	8.18986e-08	Cebpb	D28	LungB
3.939e-07	0.574446	0.457	0.284	0.0122605	Dnajb1	D28	LungB
1.75274e-24	0.555364	0.89	0.705	5.45559e-20	Rpl13a	D28	LungB
4.10764e-09	0.529711	0.584	0.377	0.000127854	Hspa5	D28	LungB
1.28721e-10	0.517132	0.658	0.429	4.00658e-06	Mgp	D28	LungB
1.00769e-06	0.496229	0.717	0.56	0.0313654	Hsp90aa1	D28	LungB
5.58275e-18	0.484766	0.95	0.817	1.73769e-13	Hspa8	D28	LungB
8.08604e-06	0.464499	0.352	0.201	0.251686	Fabp4	D28	LungB
1.19069e-11	0.462253	0.703	0.455	3.70615e-07	Dnaja1	D28	LungB
4.79427e-06	0.4304	0.274	0.135	0.149226	Rpl27-ps3	D28	LungB
1.69163e-07	0.399947	0.329	0.163	0.00526538	Cacybp	D28	LungB
1.31366e-06	0.394726	0.47	0.289	0.040889	Hnrnpu	D28	LungB
1.40976e-07	0.393232	0.342	0.175	0.004388	Pcbp1	D28	LungB
0.0325479	0.387255	0.361	0.275	1	Jun	D28	LungB
5.46718e-05	0.375466	0.648	0.513	1	Gm31243	D28	LungB
6.65474e-07	0.368298	0.402	0.229	0.0207136	Add3	D28	LungB
7.87352e-05	0.367714	0.274	0.153	1	Stt3b	D28	LungB
7.16368e-06	0.360774	0.507	0.334	0.222977	Lcp1	D28	LungB
0.000126643	0.359979	0.301	0.177	1	Hspd1	D28	LungB
3.39201e-06	0.357323	0.58	0.398	0.10558	Cd83	D28	LungB
0.000124237	0.353941	0.274	0.155	1	Pi16	D28	LungB
1.01757e-07	0.353314	0.425	0.238	0.00316729	Eif4g2	D28	LungB
6.74351e-05	0.351202	0.301	0.17	1	Txnip	D28	LungB
0.000416423	0.351088	0.393	0.261	1	Satb1	D28	LungB
1.64082e-05	0.340142	0.256	0.129	0.510722	Canx	D28	LungB
8.36171e-07	0.332938	0.744	0.562	0.0260267	Dcn	D28	LungB
1.30836e-19	0.33183	0.936	0.936	4.07239e-15	Rps28	D28	LungB
3.16075e-07	0.331404	0.598	0.4	0.00983815	Snrpg	D28	LungB
0.00313076	0.33065	0.338	0.229	1	Vps37b	D28	LungB
6.81656e-05	0.329197	0.256	0.137	1	Smarca5	D28	LungB
1.12872e-06	0.327902	0.411	0.242	0.0351325	Fam107b	D28	LungB
2.82425e-10	0.322883	0.858	0.647	8.79077e-06	Rsrp1	D28	LungB
6.38227e-06	0.322544	0.699	0.524	0.198654	Cst3	D28	LungB
0.000223115	0.315878	0.26	0.145	1	Selenop	D28	LungB
6.68774e-06	0.314664	0.265	0.135	0.208163	Lum	D28	LungB
1.90451e-06	0.302972	0.347	0.195	0.0592797	Ahsa1	D28	LungB
7.89442e-05	0.290498	0.374	0.235	1	Selenof	D28	LungB
0.000403552	0.288274	0.868	0.785	1	Hsp90ab1	D28	LungB
1.83297e-07	0.282638	0.918	0.916	0.00570531	Btg1	D28	LungB
8.96673e-05	0.282636	0.393	0.258	1	Atp6v0b	D28	LungB
4.07e-05	0.27751	0.324	0.195	1	Nop56	D28	LungB
2.56632e-05	0.276233	0.406	0.258	0.798794	Cct5	D28	LungB
7.29606e-05	0.273122	0.283	0.163	1	Srsf7	D28	LungB
0.0072239	0.268298	0.274	0.182	1	Cd22	D28	LungB
0.000904292	0.267852	0.306	0.192	1	Nfkbid	D28	LungB
7.48598e-05	0.267652	0.397	0.258	1	Sfpq	D28	LungB
0.000692763	0.267622	0.301	0.189	1	Tmed5	D28	LungB
0.0138429	0.264479	0.269	0.182	1	Atp2b1	D28	LungB
0.014434	0.261599	0.352	0.255	1	Tmod3	D28	LungB
0.00822382	0.260913	0.406	0.301	1	Calr	D28	LungB
5.11941e-05	0.254281	0.251	0.142	1	Prpf4b	D28	LungB
2.32049e-14	0.253798	0.936	0.961	7.22276e-10	Rpl35	D28	LungB
0.0028878	0.253576	0.26	0.162	1	Chmp2a	D28	LungB
0.000777801	0.252279	0.616	0.483	1	Atp5b	D28	LungB
0.000991431	0.252006	0.397	0.273	1	Tax1bp1	D28	LungB
8.46698e-06	-0.251741	0.808	0.845	0.263543	Rpl29	D28	LungB
3.46646e-08	-0.253192	0.941	0.967	0.00107897	Rpl18	D28	LungB
2.91291e-06	-0.253801	0.936	0.944	0.0906673	Rpl7	D28	LungB
6.94415e-05	-0.258749	0.311	0.334	1	Arhgdia	D28	LungB
4.57757e-05	-0.260205	0.352	0.383	1	Atp5g2	D28	LungB
1.14903e-12	-0.26041	0.941	0.992	3.57646e-08	Rps16	D28	LungB
0.0143106	-0.260685	0.237	0.289	1	Mtdh	D28	LungB
6.44289e-08	-0.263878	0.881	0.865	0.00200541	Cd52	D28	LungB
1.38181e-09	-0.271081	0.963	0.981	4.30102e-05	Rpl27a	D28	LungB
2.12209e-08	-0.276488	0.922	0.965	0.000660522	Rps25	D28	LungB
1.37316e-05	-0.278315	0.566	0.615	0.42741	Cox7a2l	D28	LungB
4.69298e-08	-0.27861	0.9	0.931	0.00146074	Rpl10a	D28	LungB
2.00799e-12	-0.281745	0.959	0.983	6.25006e-08	Rpl26	D28	LungB
2.26117e-18	-0.283495	0.959	0.998	7.03813e-14	Fau	D28	LungB
1.29576e-11	-0.291575	0.95	0.987	4.03317e-07	Rps8	D28	LungB
3.42122e-08	-0.294441	0.895	0.953	0.00106489	Ly6e	D28	LungB
4.35195e-05	-0.301725	0.557	0.63	1	Uqcrh	D28	LungB
3.93327e-07	-0.302223	0.927	0.951	0.0122427	Actb	D28	LungB
1.05593e-10	-0.306076	0.932	0.972	3.28667e-06	Rps20	D28	LungB
3.68813e-14	-0.307739	0.959	0.987	1.14797e-09	Rps9	D28	LungB
4.76174e-11	-0.310685	0.922	0.962	1.48214e-06	Rpsa	D28	LungB
0.00531794	-0.315411	0.192	0.258	1	Tspan32	D28	LungB
1.0732e-09	-0.31684	0.881	0.927	3.34045e-05	Rps17	D28	LungB
1.10541e-12	-0.316873	0.936	0.987	3.4407e-08	Rps4x	D28	LungB
1.33326e-08	-0.317041	0.781	0.807	0.000414991	Rpl5	D28	LungB
1.84735e-17	-0.317055	0.945	0.993	5.75005e-13	Rps24	D28	LungB
1.81118e-11	-0.317531	0.89	0.92	5.63749e-07	Rpl30	D28	LungB
0.0435416	-0.317847	0.324	0.366	1	Ifi27l2a	D28	LungB
3.20694e-15	-0.318579	0.95	0.99	9.98191e-11	Rpl21	D28	LungB
3.13106e-15	-0.321534	0.963	0.987	9.74572e-11	Rps3a1	D28	LungB
6.98276e-16	-0.323379	0.95	0.989	2.17345e-11	Rpl19	D28	LungB
3.4966e-05	-0.325738	0.251	0.304	1	Cirbp	D28	LungB
2.64967e-15	-0.328691	0.932	0.984	8.24737e-11	Rpl8	D28	LungB
4.48688e-15	-0.328823	0.941	0.981	1.39659e-10	Rps27a	D28	LungB
3.10851e-15	-0.332496	0.95	0.984	9.67554e-11	Rps15	D28	LungB
4.73011e-15	-0.332904	0.95	0.985	1.47229e-10	Rps3	D28	LungB
2.24982e-15	-0.33952	0.959	0.965	7.0028e-11	Rplp1	D28	LungB
2.0692e-07	-0.342855	0.53	0.585	0.00644058	Eef1b2	D28	LungB
9.55151e-17	-0.345682	0.927	0.988	2.973e-12	Rps13	D28	LungB
8.52031e-16	-0.351128	0.954	0.99	2.65203e-11	Eef1a1	D28	LungB
6.27127e-10	-0.358712	0.735	0.793	1.952e-05	Rack1	D28	LungB
0.000142272	-0.3669	0.292	0.397	1	Ppdpf	D28	LungB
4.7038e-16	-0.367379	0.913	0.984	1.46411e-11	Rpl23	D28	LungB
7.72415e-10	-0.377181	0.767	0.829	2.40422e-05	Sh3bgrl3	D28	LungB
4.33367e-11	-0.377803	0.936	0.966	1.3489e-06	Tpt1	D28	LungB
0.000175711	-0.390388	0.178	0.273	1	AY036118	D28	LungB
4.81048e-06	-0.420668	0.274	0.382	0.149731	Gm42418	D28	LungB
7.65749e-07	-0.451986	0.215	0.296	0.0238347	Gm10076	D28	LungB
2.95757e-16	-0.454716	0.84	0.912	9.20573e-12	Rps12	D28	LungB
7.45506e-24	-0.547601	0.872	0.921	2.32046e-19	Rpl12	D28	LungB

## Sheet: Testis 
p_val	avg_logFC	pct.1	pct.2	p_val_adj	gene	orig.ident	cluster
1.1712e-09	1.40902	0.26	0.121	3.64546e-05	Hspa1a	D28	Testis
5.43277e-23	0.739565	0.689	0.394	1.691e-18	Gm11808	D28	Testis
2.09286e-18	0.692297	0.598	0.307	6.51424e-14	Serinc3	D28	Testis
2.63119e-12	0.662702	0.324	0.118	8.18986e-08	Cebpb	D28	Testis
3.939e-07	0.574446	0.457	0.284	0.0122605	Dnajb1	D28	Testis
1.75274e-24	0.555364	0.89	0.705	5.45559e-20	Rpl13a	D28	Testis
4.10764e-09	0.529711	0.584	0.377	0.000127854	Hspa5	D28	Testis
1.28721e-10	0.517132	0.658	0.429	4.00658e-06	Mgp	D28	Testis
1.00769e-06	0.496229	0.717	0.56	0.0313654	Hsp90aa1	D28	Testis
5.58275e-18	0.484766	0.95	0.817	1.73769e-13	Hspa8	D28	Testis
8.08604e-06	0.464499	0.352	0.201	0.251686	Fabp4	D28	Testis
1.19069e-11	0.462253	0.703	0.455	3.70615e-07	Dnaja1	D28	Testis
4.79427e-06	0.4304	0.274	0.135	0.149226	Rpl27-ps3	D28	Testis
1.69163e-07	0.399947	0.329	0.163	0.00526538	Cacybp	D28	Testis
1.31366e-06	0.394726	0.47	0.289	0.040889	Hnrnpu	D28	Testis
1.40976e-07	0.393232	0.342	0.175	0.004388	Pcbp1	D28	Testis
0.0325479	0.387255	0.361	0.275	1	Jun	D28	Testis
5.46718e-05	0.375466	0.648	0.513	1	Gm31243	D28	Testis
6.65474e-07	0.368298	0.402	0.229	0.0207136	Add3	D28	Testis
7.87352e-05	0.367714	0.274	0.153	1	Stt3b	D28	Testis
7.16368e-06	0.360774	0.507	0.334	0.222977	Lcp1	D28	Testis
0.000126643	0.359979	0.301	0.177	1	Hspd1	D28	Testis
3.39201e-06	0.357323	0.58	0.398	0.10558	Cd83	D28	Testis
0.000124237	0.353941	0.274	0.155	1	Pi16	D28	Testis
1.01757e-07	0.353314	0.425	0.238	0.00316729	Eif4g2	D28	Testis
6.74351e-05	0.351202	0.301	0.17	1	Txnip	D28	Testis
0.000416423	0.351088	0.393	0.261	1	Satb1	D28	Testis
1.64082e-05	0.340142	0.256	0.129	0.510722	Canx	D28	Testis
8.36171e-07	0.332938	0.744	0.562	0.0260267	Dcn	D28	Testis
1.30836e-19	0.33183	0.936	0.936	4.07239e-15	Rps28	D28	Testis
3.16075e-07	0.331404	0.598	0.4	0.00983815	Snrpg	D28	Testis
0.00313076	0.33065	0.338	0.229	1	Vps37b	D28	Testis
6.81656e-05	0.329197	0.256	0.137	1	Smarca5	D28	Testis
1.12872e-06	0.327902	0.411	0.242	0.0351325	Fam107b	D28	Testis
2.82425e-10	0.322883	0.858	0.647	8.79077e-06	Rsrp1	D28	Testis
6.38227e-06	0.322544	0.699	0.524	0.198654	Cst3	D28	Testis
0.000223115	0.315878	0.26	0.145	1	Selenop	D28	Testis
6.68774e-06	0.314664	0.265	0.135	0.208163	Lum	D28	Testis
1.90451e-06	0.302972	0.347	0.195	0.0592797	Ahsa1	D28	Testis
7.89442e-05	0.290498	0.374	0.235	1	Selenof	D28	Testis
0.000403552	0.288274	0.868	0.785	1	Hsp90ab1	D28	Testis
1.83297e-07	0.282638	0.918	0.916	0.00570531	Btg1	D28	Testis
8.96673e-05	0.282636	0.393	0.258	1	Atp6v0b	D28	Testis
4.07e-05	0.27751	0.324	0.195	1	Nop56	D28	Testis
2.56632e-05	0.276233	0.406	0.258	0.798794	Cct5	D28	Testis
7.29606e-05	0.273122	0.283	0.163	1	Srsf7	D28	Testis
0.0072239	0.268298	0.274	0.182	1	Cd22	D28	Testis
0.000904292	0.267852	0.306	0.192	1	Nfkbid	D28	Testis
7.48598e-05	0.267652	0.397	0.258	1	Sfpq	D28	Testis
0.000692763	0.267622	0.301	0.189	1	Tmed5	D28	Testis
0.0138429	0.264479	0.269	0.182	1	Atp2b1	D28	Testis
0.014434	0.261599	0.352	0.255	1	Tmod3	D28	Testis
0.00822382	0.260913	0.406	0.301	1	Calr	D28	Testis
5.11941e-05	0.254281	0.251	0.142	1	Prpf4b	D28	Testis
2.32049e-14	0.253798	0.936	0.961	7.22276e-10	Rpl35	D28	Testis
0.0028878	0.253576	0.26	0.162	1	Chmp2a	D28	Testis
0.000777801	0.252279	0.616	0.483	1	Atp5b	D28	Testis
0.000991431	0.252006	0.397	0.273	1	Tax1bp1	D28	Testis
8.46698e-06	-0.251741	0.808	0.845	0.263543	Rpl29	D28	Testis
3.46646e-08	-0.253192	0.941	0.967	0.00107897	Rpl18	D28	Testis
2.91291e-06	-0.253801	0.936	0.944	0.0906673	Rpl7	D28	Testis
6.94415e-05	-0.258749	0.311	0.334	1	Arhgdia	D28	Testis
4.57757e-05	-0.260205	0.352	0.383	1	Atp5g2	D28	Testis
1.14903e-12	-0.26041	0.941	0.992	3.57646e-08	Rps16	D28	Testis
0.0143106	-0.260685	0.237	0.289	1	Mtdh	D28	Testis
6.44289e-08	-0.263878	0.881	0.865	0.00200541	Cd52	D28	Testis
1.38181e-09	-0.271081	0.963	0.981	4.30102e-05	Rpl27a	D28	Testis
2.12209e-08	-0.276488	0.922	0.965	0.000660522	Rps25	D28	Testis
1.37316e-05	-0.278315	0.566	0.615	0.42741	Cox7a2l	D28	Testis
4.69298e-08	-0.27861	0.9	0.931	0.00146074	Rpl10a	D28	Testis
2.00799e-12	-0.281745	0.959	0.983	6.25006e-08	Rpl26	D28	Testis
2.26117e-18	-0.283495	0.959	0.998	7.03813e-14	Fau	D28	Testis
1.29576e-11	-0.291575	0.95	0.987	4.03317e-07	Rps8	D28	Testis
3.42122e-08	-0.294441	0.895	0.953	0.00106489	Ly6e	D28	Testis
4.35195e-05	-0.301725	0.557	0.63	1	Uqcrh	D28	Testis
3.93327e-07	-0.302223	0.927	0.951	0.0122427	Actb	D28	Testis
1.05593e-10	-0.306076	0.932	0.972	3.28667e-06	Rps20	D28	Testis
3.68813e-14	-0.307739	0.959	0.987	1.14797e-09	Rps9	D28	Testis
4.76174e-11	-0.310685	0.922	0.962	1.48214e-06	Rpsa	D28	Testis
0.00531794	-0.315411	0.192	0.258	1	Tspan32	D28	Testis
1.0732e-09	-0.31684	0.881	0.927	3.34045e-05	Rps17	D28	Testis
1.10541e-12	-0.316873	0.936	0.987	3.4407e-08	Rps4x	D28	Testis
1.33326e-08	-0.317041	0.781	0.807	0.000414991	Rpl5	D28	Testis
1.84735e-17	-0.317055	0.945	0.993	5.75005e-13	Rps24	D28	Testis
1.81118e-11	-0.317531	0.89	0.92	5.63749e-07	Rpl30	D28	Testis
0.0435416	-0.317847	0.324	0.366	1	Ifi27l2a	D28	Testis
3.20694e-15	-0.318579	0.95	0.99	9.98191e-11	Rpl21	D28	Testis
3.13106e-15	-0.321534	0.963	0.987	9.74572e-11	Rps3a1	D28	Testis
6.98276e-16	-0.323379	0.95	0.989	2.17345e-11	Rpl19	D28	Testis
3.4966e-05	-0.325738	0.251	0.304	1	Cirbp	D28	Testis
2.64967e-15	-0.328691	0.932	0.984	8.24737e-11	Rpl8	D28	Testis
4.48688e-15	-0.328823	0.941	0.981	1.39659e-10	Rps27a	D28	Testis
3.10851e-15	-0.332496	0.95	0.984	9.67554e-11	Rps15	D28	Testis
4.73011e-15	-0.332904	0.95	0.985	1.47229e-10	Rps3	D28	Testis
2.24982e-15	-0.33952	0.959	0.965	7.0028e-11	Rplp1	D28	Testis
2.0692e-07	-0.342855	0.53	0.585	0.00644058	Eef1b2	D28	Testis
9.55151e-17	-0.345682	0.927	0.988	2.973e-12	Rps13	D28	Testis
8.52031e-16	-0.351128	0.954	0.99	2.65203e-11	Eef1a1	D28	Testis
6.27127e-10	-0.358712	0.735	0.793	1.952e-05	Rack1	D28	Testis
0.000142272	-0.3669	0.292	0.397	1	Ppdpf	D28	Testis
4.7038e-16	-0.367379	0.913	0.984	1.46411e-11	Rpl23	D28	Testis
7.72415e-10	-0.377181	0.767	0.829	2.40422e-05	Sh3bgrl3	D28	Testis
4.33367e-11	-0.377803	0.936	0.966	1.3489e-06	Tpt1	D28	Testis
0.000175711	-0.390388	0.178	0.273	1	AY036118	D28	Testis
4.81048e-06	-0.420668	0.274	0.382	0.149731	Gm42418	D28	Testis
7.65749e-07	-0.451986	0.215	0.296	0.0238347	Gm10076	D28	Testis
2.95757e-16	-0.454716	0.84	0.912	9.20573e-12	Rps12	D28	Testis
7.45506e-24	-0.547601	0.872	0.921	2.32046e-19	Rpl12	D28	Testis

## Sheet: KidneyB 
p_val	avg_logFC	pct.1	pct.2	p_val_adj	gene	orig.ident	cluster
1.1712e-09	1.40902	0.26	0.121	3.64546e-05	Hspa1a	D28	KidneyB
5.43277e-23	0.739565	0.689	0.394	1.691e-18	Gm11808	D28	KidneyB
2.09286e-18	0.692297	0.598	0.307	6.51424e-14	Serinc3	D28	KidneyB
2.63119e-12	0.662702	0.324	0.118	8.18986e-08	Cebpb	D28	KidneyB
3.939e-07	0.574446	0.457	0.284	0.0122605	Dnajb1	D28	KidneyB
1.75274e-24	0.555364	0.89	0.705	5.45559e-20	Rpl13a	D28	KidneyB
4.10764e-09	0.529711	0.584	0.377	0.000127854	Hspa5	D28	KidneyB
1.28721e-10	0.517132	0.658	0.429	4.00658e-06	Mgp	D28	KidneyB
1.00769e-06	0.496229	0.717	0.56	0.0313654	Hsp90aa1	D28	KidneyB
5.58275e-18	0.484766	0.95	0.817	1.73769e-13	Hspa8	D28	KidneyB
8.08604e-06	0.464499	0.352	0.201	0.251686	Fabp4	D28	KidneyB
1.19069e-11	0.462253	0.703	0.455	3.70615e-07	Dnaja1	D28	KidneyB
4.79427e-06	0.4304	0.274	0.135	0.149226	Rpl27-ps3	D28	KidneyB
1.69163e-07	0.399947	0.329	0.163	0.00526538	Cacybp	D28	KidneyB
1.31366e-06	0.394726	0.47	0.289	0.040889	Hnrnpu	D28	KidneyB
1.40976e-07	0.393232	0.342	0.175	0.004388	Pcbp1	D28	KidneyB
0.0325479	0.387255	0.361	0.275	1	Jun	D28	KidneyB
5.46718e-05	0.375466	0.648	0.513	1	Gm31243	D28	KidneyB
6.65474e-07	0.368298	0.402	0.229	0.0207136	Add3	D28	KidneyB
7.87352e-05	0.367714	0.274	0.153	1	Stt3b	D28	KidneyB
7.16368e-06	0.360774	0.507	0.334	0.222977	Lcp1	D28	KidneyB
0.000126643	0.359979	0.301	0.177	1	Hspd1	D28	KidneyB
3.39201e-06	0.357323	0.58	0.398	0.10558	Cd83	D28	KidneyB
0.000124237	0.353941	0.274	0.155	1	Pi16	D28	KidneyB
1.01757e-07	0.353314	0.425	0.238	0.00316729	Eif4g2	D28	KidneyB
6.74351e-05	0.351202	0.301	0.17	1	Txnip	D28	KidneyB
0.000416423	0.351088	0.393	0.261	1	Satb1	D28	KidneyB
1.64082e-05	0.340142	0.256	0.129	0.510722	Canx	D28	KidneyB
8.36171e-07	0.332938	0.744	0.562	0.0260267	Dcn	D28	KidneyB
1.30836e-19	0.33183	0.936	0.936	4.07239e-15	Rps28	D28	KidneyB
3.16075e-07	0.331404	0.598	0.4	0.00983815	Snrpg	D28	KidneyB
0.00313076	0.33065	0.338	0.229	1	Vps37b	D28	KidneyB
6.81656e-05	0.329197	0.256	0.137	1	Smarca5	D28	KidneyB
1.12872e-06	0.327902	0.411	0.242	0.0351325	Fam107b	D28	KidneyB
2.82425e-10	0.322883	0.858	0.647	8.79077e-06	Rsrp1	D28	KidneyB
6.38227e-06	0.322544	0.699	0.524	0.198654	Cst3	D28	KidneyB
0.000223115	0.315878	0.26	0.145	1	Selenop	D28	KidneyB
6.68774e-06	0.314664	0.265	0.135	0.208163	Lum	D28	KidneyB
1.90451e-06	0.302972	0.347	0.195	0.0592797	Ahsa1	D28	KidneyB
7.89442e-05	0.290498	0.374	0.235	1	Selenof	D28	KidneyB
0.000403552	0.288274	0.868	0.785	1	Hsp90ab1	D28	KidneyB
1.83297e-07	0.282638	0.918	0.916	0.00570531	Btg1	D28	KidneyB
8.96673e-05	0.282636	0.393	0.258	1	Atp6v0b	D28	KidneyB
4.07e-05	0.27751	0.324	0.195	1	Nop56	D28	KidneyB
2.56632e-05	0.276233	0.406	0.258	0.798794	Cct5	D28	KidneyB
7.29606e-05	0.273122	0.283	0.163	1	Srsf7	D28	KidneyB
0.0072239	0.268298	0.274	0.182	1	Cd22	D28	KidneyB
0.000904292	0.267852	0.306	0.192	1	Nfkbid	D28	KidneyB
7.48598e-05	0.267652	0.397	0.258	1	Sfpq	D28	KidneyB
0.000692763	0.267622	0.301	0.189	1	Tmed5	D28	KidneyB
0.0138429	0.264479	0.269	0.182	1	Atp2b1	D28	KidneyB
0.014434	0.261599	0.352	0.255	1	Tmod3	D28	KidneyB
0.00822382	0.260913	0.406	0.301	1	Calr	D28	KidneyB
5.11941e-05	0.254281	0.251	0.142	1	Prpf4b	D28	KidneyB
2.32049e-14	0.253798	0.936	0.961	7.22276e-10	Rpl35	D28	KidneyB
0.0028878	0.253576	0.26	0.162	1	Chmp2a	D28	KidneyB
0.000777801	0.252279	0.616	0.483	1	Atp5b	D28	KidneyB
0.000991431	0.252006	0.397	0.273	1	Tax1bp1	D28	KidneyB
8.46698e-06	-0.251741	0.808	0.845	0.263543	Rpl29	D28	KidneyB
3.46646e-08	-0.253192	0.941	0.967	0.00107897	Rpl18	D28	KidneyB
2.91291e-06	-0.253801	0.936	0.944	0.0906673	Rpl7	D28	KidneyB
6.94415e-05	-0.258749	0.311	0.334	1	Arhgdia	D28	KidneyB
4.57757e-05	-0.260205	0.352	0.383	1	Atp5g2	D28	KidneyB
1.14903e-12	-0.26041	0.941	0.992	3.57646e-08	Rps16	D28	KidneyB
0.0143106	-0.260685	0.237	0.289	1	Mtdh	D28	KidneyB
6.44289e-08	-0.263878	0.881	0.865	0.00200541	Cd52	D28	KidneyB
1.38181e-09	-0.271081	0.963	0.981	4.30102e-05	Rpl27a	D28	KidneyB
2.12209e-08	-0.276488	0.922	0.965	0.000660522	Rps25	D28	KidneyB
1.37316e-05	-0.278315	0.566	0.615	0.42741	Cox7a2l	D28	KidneyB
4.69298e-08	-0.27861	0.9	0.931	0.00146074	Rpl10a	D28	KidneyB
2.00799e-12	-0.281745	0.959	0.983	6.25006e-08	Rpl26	D28	KidneyB
2.26117e-18	-0.283495	0.959	0.998	7.03813e-14	Fau	D28	KidneyB
1.29576e-11	-0.291575	0.95	0.987	4.03317e-07	Rps8	D28	KidneyB
3.42122e-08	-0.294441	0.895	0.953	0.00106489	Ly6e	D28	KidneyB
4.35195e-05	-0.301725	0.557	0.63	1	Uqcrh	D28	KidneyB
3.93327e-07	-0.302223	0.927	0.951	0.0122427	Actb	D28	KidneyB
1.05593e-10	-0.306076	0.932	0.972	3.28667e-06	Rps20	D28	KidneyB
3.68813e-14	-0.307739	0.959	0.987	1.14797e-09	Rps9	D28	KidneyB
4.76174e-11	-0.310685	0.922	0.962	1.48214e-06	Rpsa	D28	KidneyB
0.00531794	-0.315411	0.192	0.258	1	Tspan32	D28	KidneyB
1.0732e-09	-0.31684	0.881	0.927	3.34045e-05	Rps17	D28	KidneyB
1.10541e-12	-0.316873	0.936	0.987	3.4407e-08	Rps4x	D28	KidneyB
1.33326e-08	-0.317041	0.781	0.807	0.000414991	Rpl5	D28	KidneyB
1.84735e-17	-0.317055	0.945	0.993	5.75005e-13	Rps24	D28	KidneyB
1.81118e-11	-0.317531	0.89	0.92	5.63749e-07	Rpl30	D28	KidneyB
0.0435416	-0.317847	0.324	0.366	1	Ifi27l2a	D28	KidneyB
3.20694e-15	-0.318579	0.95	0.99	9.98191e-11	Rpl21	D28	KidneyB
3.13106e-15	-0.321534	0.963	0.987	9.74572e-11	Rps3a1	D28	KidneyB
6.98276e-16	-0.323379	0.95	0.989	2.17345e-11	Rpl19	D28	KidneyB
3.4966e-05	-0.325738	0.251	0.304	1	Cirbp	D28	KidneyB
2.64967e-15	-0.328691	0.932	0.984	8.24737e-11	Rpl8	D28	KidneyB
4.48688e-15	-0.328823	0.941	0.981	1.39659e-10	Rps27a	D28	KidneyB
3.10851e-15	-0.332496	0.95	0.984	9.67554e-11	Rps15	D28	KidneyB
4.73011e-15	-0.332904	0.95	0.985	1.47229e-10	Rps3	D28	KidneyB
2.24982e-15	-0.33952	0.959	0.965	7.0028e-11	Rplp1	D28	KidneyB
2.0692e-07	-0.342855	0.53	0.585	0.00644058	Eef1b2	D28	KidneyB
9.55151e-17	-0.345682	0.927	0.988	2.973e-12	Rps13	D28	KidneyB
8.52031e-16	-0.351128	0.954	0.99	2.65203e-11	Eef1a1	D28	KidneyB
6.27127e-10	-0.358712	0.735	0.793	1.952e-05	Rack1	D28	KidneyB
0.000142272	-0.3669	0.292	0.397	1	Ppdpf	D28	KidneyB
4.7038e-16	-0.367379	0.913	0.984	1.46411e-11	Rpl23	D28	KidneyB
7.72415e-10	-0.377181	0.767	0.829	2.40422e-05	Sh3bgrl3	D28	KidneyB
4.33367e-11	-0.377803	0.936	0.966	1.3489e-06	Tpt1	D28	KidneyB
0.000175711	-0.390388	0.178	0.273	1	AY036118	D28	KidneyB
4.81048e-06	-0.420668	0.274	0.382	0.149731	Gm42418	D28	KidneyB
7.65749e-07	-0.451986	0.215	0.296	0.0238347	Gm10076	D28	KidneyB
2.95757e-16	-0.454716	0.84	0.912	9.20573e-12	Rps12	D28	KidneyB
7.45506e-24	-0.547601	0.872	0.921	2.32046e-19	Rpl12	D28	KidneyB

## Sheet: LungC 
p_val	avg_logFC	pct.1	pct.2	p_val_adj	gene	orig.ident	cluster
1.75274e-24	0.555364	0.89	0.705	5.45559e-20	Rpl13a	D28	LungC
7.45506e-24	-0.547601	0.872	0.921	2.32046e-19	Rpl12	D28	LungC
5.43277e-23	0.739565	0.689	0.394	1.691e-18	Gm11808	D28	LungC
1.30836e-19	0.33183	0.936	0.936	4.07239e-15	Rps28	D28	LungC
2.09286e-18	0.692297	0.598	0.307	6.51424e-14	Serinc3	D28	LungC
2.26117e-18	-0.283495	0.959	0.998	7.03813e-14	Fau	D28	LungC
5.58275e-18	0.484766	0.95	0.817	1.73769e-13	Hspa8	D28	LungC
1.84735e-17	-0.317055	0.945	0.993	5.75005e-13	Rps24	D28	LungC
9.55151e-17	-0.345682	0.927	0.988	2.973e-12	Rps13	D28	LungC
2.95757e-16	-0.454716	0.84	0.912	9.20573e-12	Rps12	D28	LungC
4.7038e-16	-0.367379	0.913	0.984	1.46411e-11	Rpl23	D28	LungC
6.98276e-16	-0.323379	0.95	0.989	2.17345e-11	Rpl19	D28	LungC
8.52031e-16	-0.351128	0.954	0.99	2.65203e-11	Eef1a1	D28	LungC
2.24982e-15	-0.33952	0.959	0.965	7.0028e-11	Rplp1	D28	LungC
2.64967e-15	-0.328691	0.932	0.984	8.24737e-11	Rpl8	D28	LungC
3.10851e-15	-0.332496	0.95	0.984	9.67554e-11	Rps15	D28	LungC
3.13106e-15	-0.321534	0.963	0.987	9.74572e-11	Rps3a1	D28	LungC
3.20694e-15	-0.318579	0.95	0.99	9.98191e-11	Rpl21	D28	LungC
4.48688e-15	-0.328823	0.941	0.981	1.39659e-10	Rps27a	D28	LungC
4.73011e-15	-0.332904	0.95	0.985	1.47229e-10	Rps3	D28	LungC
2.32049e-14	0.253798	0.936	0.961	7.22276e-10	Rpl35	D28	LungC
3.68813e-14	-0.307739	0.959	0.987	1.14797e-09	Rps9	D28	LungC
1.10541e-12	-0.316873	0.936	0.987	3.4407e-08	Rps4x	D28	LungC
1.14903e-12	-0.26041	0.941	0.992	3.57646e-08	Rps16	D28	LungC
2.00799e-12	-0.281745	0.959	0.983	6.25006e-08	Rpl26	D28	LungC
2.63119e-12	0.662702	0.324	0.118	8.18986e-08	Cebpb	D28	LungC
1.19069e-11	0.462253	0.703	0.455	3.70615e-07	Dnaja1	D28	LungC
1.29576e-11	-0.291575	0.95	0.987	4.03317e-07	Rps8	D28	LungC
1.81118e-11	-0.317531	0.89	0.92	5.63749e-07	Rpl30	D28	LungC
4.33367e-11	-0.377803	0.936	0.966	1.3489e-06	Tpt1	D28	LungC
4.76174e-11	-0.310685	0.922	0.962	1.48214e-06	Rpsa	D28	LungC
1.05593e-10	-0.306076	0.932	0.972	3.28667e-06	Rps20	D28	LungC
1.28721e-10	0.517132	0.658	0.429	4.00658e-06	Mgp	D28	LungC
2.82425e-10	0.322883	0.858	0.647	8.79077e-06	Rsrp1	D28	LungC
6.27127e-10	-0.358712	0.735	0.793	1.952e-05	Rack1	D28	LungC
7.72415e-10	-0.377181	0.767	0.829	2.40422e-05	Sh3bgrl3	D28	LungC
1.0732e-09	-0.31684	0.881	0.927	3.34045e-05	Rps17	D28	LungC
1.1712e-09	1.40902	0.26	0.121	3.64546e-05	Hspa1a	D28	LungC
1.38181e-09	-0.271081	0.963	0.981	4.30102e-05	Rpl27a	D28	LungC
4.10764e-09	0.529711	0.584	0.377	0.000127854	Hspa5	D28	LungC
1.33326e-08	-0.317041	0.781	0.807	0.000414991	Rpl5	D28	LungC
2.12209e-08	-0.276488	0.922	0.965	0.000660522	Rps25	D28	LungC
3.42122e-08	-0.294441	0.895	0.953	0.00106489	Ly6e	D28	LungC
3.46646e-08	-0.253192	0.941	0.967	0.00107897	Rpl18	D28	LungC
4.69298e-08	-0.27861	0.9	0.931	0.00146074	Rpl10a	D28	LungC
6.44289e-08	-0.263878	0.881	0.865	0.00200541	Cd52	D28	LungC
1.01757e-07	0.353314	0.425	0.238	0.00316729	Eif4g2	D28	LungC
1.40976e-07	0.393232	0.342	0.175	0.004388	Pcbp1	D28	LungC
1.69163e-07	0.399947	0.329	0.163	0.00526538	Cacybp	D28	LungC
1.83297e-07	0.282638	0.918	0.916	0.00570531	Btg1	D28	LungC
2.0692e-07	-0.342855	0.53	0.585	0.00644058	Eef1b2	D28	LungC
3.16075e-07	0.331404	0.598	0.4	0.00983815	Snrpg	D28	LungC
3.93327e-07	-0.302223	0.927	0.951	0.0122427	Actb	D28	LungC
3.939e-07	0.574446	0.457	0.284	0.0122605	Dnajb1	D28	LungC
6.65474e-07	0.368298	0.402	0.229	0.0207136	Add3	D28	LungC
7.65749e-07	-0.451986	0.215	0.296	0.0238347	Gm10076	D28	LungC
8.36171e-07	0.332938	0.744	0.562	0.0260267	Dcn	D28	LungC
1.00769e-06	0.496229	0.717	0.56	0.0313654	Hsp90aa1	D28	LungC
1.12872e-06	0.327902	0.411	0.242	0.0351325	Fam107b	D28	LungC
1.31366e-06	0.394726	0.47	0.289	0.040889	Hnrnpu	D28	LungC
1.90451e-06	0.302972	0.347	0.195	0.0592797	Ahsa1	D28	LungC
2.91291e-06	-0.253801	0.936	0.944	0.0906673	Rpl7	D28	LungC
3.39201e-06	0.357323	0.58	0.398	0.10558	Cd83	D28	LungC
4.79427e-06	0.4304	0.274	0.135	0.149226	Rpl27-ps3	D28	LungC
4.81048e-06	-0.420668	0.274	0.382	0.149731	Gm42418	D28	LungC
6.38227e-06	0.322544	0.699	0.524	0.198654	Cst3	D28	LungC
6.68774e-06	0.314664	0.265	0.135	0.208163	Lum	D28	LungC
7.16368e-06	0.360774	0.507	0.334	0.222977	Lcp1	D28	LungC
8.08604e-06	0.464499	0.352	0.201	0.251686	Fabp4	D28	LungC
8.46698e-06	-0.251741	0.808	0.845	0.263543	Rpl29	D28	LungC
1.37316e-05	-0.278315	0.566	0.615	0.42741	Cox7a2l	D28	LungC
1.64082e-05	0.340142	0.256	0.129	0.510722	Canx	D28	LungC
2.56632e-05	0.276233	0.406	0.258	0.798794	Cct5	D28	LungC
3.4966e-05	-0.325738	0.251	0.304	1	Cirbp	D28	LungC
4.07e-05	0.27751	0.324	0.195	1	Nop56	D28	LungC
4.35195e-05	-0.301725	0.557	0.63	1	Uqcrh	D28	LungC
4.57757e-05	-0.260205	0.352	0.383	1	Atp5g2	D28	LungC
5.11941e-05	0.254281	0.251	0.142	1	Prpf4b	D28	LungC
5.46718e-05	0.375466	0.648	0.513	1	Gm31243	D28	LungC
6.74351e-05	0.351202	0.301	0.17	1	Txnip	D28	LungC
6.81656e-05	0.329197	0.256	0.137	1	Smarca5	D28	LungC
6.94415e-05	-0.258749	0.311	0.334	1	Arhgdia	D28	LungC
7.29606e-05	0.273122	0.283	0.163	1	Srsf7	D28	LungC
7.48598e-05	0.267652	0.397	0.258	1	Sfpq	D28	LungC
7.87352e-05	0.367714	0.274	0.153	1	Stt3b	D28	LungC
7.89442e-05	0.290498	0.374	0.235	1	Selenof	D28	LungC
8.96673e-05	0.282636	0.393	0.258	1	Atp6v0b	D28	LungC
0.000124237	0.353941	0.274	0.155	1	Pi16	D28	LungC
0.000126643	0.359979	0.301	0.177	1	Hspd1	D28	LungC
0.000142272	-0.3669	0.292	0.397	1	Ppdpf	D28	LungC
0.000175711	-0.390388	0.178	0.273	1	AY036118	D28	LungC
0.000223115	0.315878	0.26	0.145	1	Selenop	D28	LungC
0.000403552	0.288274	0.868	0.785	1	Hsp90ab1	D28	LungC
0.000416423	0.351088	0.393	0.261	1	Satb1	D28	LungC
0.000692763	0.267622	0.301	0.189	1	Tmed5	D28	LungC
0.000777801	0.252279	0.616	0.483	1	Atp5b	D28	LungC
0.000904292	0.267852	0.306	0.192	1	Nfkbid	D28	LungC
0.000991431	0.252006	0.397	0.273	1	Tax1bp1	D28	LungC
0.0028878	0.253576	0.26	0.162	1	Chmp2a	D28	LungC
0.00313076	0.33065	0.338	0.229	1	Vps37b	D28	LungC
0.00531794	-0.315411	0.192	0.258	1	Tspan32	D28	LungC
0.0072239	0.268298	0.274	0.182	1	Cd22	D28	LungC
0.00822382	0.260913	0.406	0.301	1	Calr	D28	LungC
0.0138429	0.264479	0.269	0.182	1	Atp2b1	D28	LungC
0.0143106	-0.260685	0.237	0.289	1	Mtdh	D28	LungC
0.014434	0.261599	0.352	0.255	1	Tmod3	D28	LungC
0.0325479	0.387255	0.361	0.275	1	Jun	D28	LungC
0.0435416	-0.317847	0.324	0.366	1	Ifi27l2a	D28	LungC

## Sheet: Liver 
p_val	avg_logFC	pct.1	pct.2	p_val_adj	gene	orig.ident	cluster
1.75274e-24	0.555364	0.89	0.705	5.45559e-20	Rpl13a	D28	Liver
7.45506e-24	-0.547601	0.872	0.921	2.32046e-19	Rpl12	D28	Liver
5.43277e-23	0.739565	0.689	0.394	1.691e-18	Gm11808	D28	Liver
1.30836e-19	0.33183	0.936	0.936	4.07239e-15	Rps28	D28	Liver
2.09286e-18	0.692297	0.598	0.307	6.51424e-14	Serinc3	D28	Liver
2.26117e-18	-0.283495	0.959	0.998	7.03813e-14	Fau	D28	Liver
5.58275e-18	0.484766	0.95	0.817	1.73769e-13	Hspa8	D28	Liver
1.84735e-17	-0.317055	0.945	0.993	5.75005e-13	Rps24	D28	Liver
9.55151e-17	-0.345682	0.927	0.988	2.973e-12	Rps13	D28	Liver
2.95757e-16	-0.454716	0.84	0.912	9.20573e-12	Rps12	D28	Liver
4.7038e-16	-0.367379	0.913	0.984	1.46411e-11	Rpl23	D28	Liver
6.98276e-16	-0.323379	0.95	0.989	2.17345e-11	Rpl19	D28	Liver
8.52031e-16	-0.351128	0.954	0.99	2.65203e-11	Eef1a1	D28	Liver
2.24982e-15	-0.33952	0.959	0.965	7.0028e-11	Rplp1	D28	Liver
2.64967e-15	-0.328691	0.932	0.984	8.24737e-11	Rpl8	D28	Liver
3.10851e-15	-0.332496	0.95	0.984	9.67554e-11	Rps15	D28	Liver
3.13106e-15	-0.321534	0.963	0.987	9.74572e-11	Rps3a1	D28	Liver
3.20694e-15	-0.318579	0.95	0.99	9.98191e-11	Rpl21	D28	Liver
4.48688e-15	-0.328823	0.941	0.981	1.39659e-10	Rps27a	D28	Liver
4.73011e-15	-0.332904	0.95	0.985	1.47229e-10	Rps3	D28	Liver
2.32049e-14	0.253798	0.936	0.961	7.22276e-10	Rpl35	D28	Liver
3.68813e-14	-0.307739	0.959	0.987	1.14797e-09	Rps9	D28	Liver
1.10541e-12	-0.316873	0.936	0.987	3.4407e-08	Rps4x	D28	Liver
1.14903e-12	-0.26041	0.941	0.992	3.57646e-08	Rps16	D28	Liver
2.00799e-12	-0.281745	0.959	0.983	6.25006e-08	Rpl26	D28	Liver
2.63119e-12	0.662702	0.324	0.118	8.18986e-08	Cebpb	D28	Liver
1.19069e-11	0.462253	0.703	0.455	3.70615e-07	Dnaja1	D28	Liver
1.29576e-11	-0.291575	0.95	0.987	4.03317e-07	Rps8	D28	Liver
1.81118e-11	-0.317531	0.89	0.92	5.63749e-07	Rpl30	D28	Liver
4.33367e-11	-0.377803	0.936	0.966	1.3489e-06	Tpt1	D28	Liver
4.76174e-11	-0.310685	0.922	0.962	1.48214e-06	Rpsa	D28	Liver
1.05593e-10	-0.306076	0.932	0.972	3.28667e-06	Rps20	D28	Liver
1.28721e-10	0.517132	0.658	0.429	4.00658e-06	Mgp	D28	Liver
2.82425e-10	0.322883	0.858	0.647	8.79077e-06	Rsrp1	D28	Liver
6.27127e-10	-0.358712	0.735	0.793	1.952e-05	Rack1	D28	Liver
7.72415e-10	-0.377181	0.767	0.829	2.40422e-05	Sh3bgrl3	D28	Liver
1.0732e-09	-0.31684	0.881	0.927	3.34045e-05	Rps17	D28	Liver
1.1712e-09	1.40902	0.26	0.121	3.64546e-05	Hspa1a	D28	Liver
1.38181e-09	-0.271081	0.963	0.981	4.30102e-05	Rpl27a	D28	Liver
4.10764e-09	0.529711	0.584	0.377	0.000127854	Hspa5	D28	Liver
1.33326e-08	-0.317041	0.781	0.807	0.000414991	Rpl5	D28	Liver
2.12209e-08	-0.276488	0.922	0.965	0.000660522	Rps25	D28	Liver
3.42122e-08	-0.294441	0.895	0.953	0.00106489	Ly6e	D28	Liver
3.46646e-08	-0.253192	0.941	0.967	0.00107897	Rpl18	D28	Liver
4.69298e-08	-0.27861	0.9	0.931	0.00146074	Rpl10a	D28	Liver
6.44289e-08	-0.263878	0.881	0.865	0.00200541	Cd52	D28	Liver
1.01757e-07	0.353314	0.425	0.238	0.00316729	Eif4g2	D28	Liver
1.40976e-07	0.393232	0.342	0.175	0.004388	Pcbp1	D28	Liver
1.69163e-07	0.399947	0.329	0.163	0.00526538	Cacybp	D28	Liver
1.83297e-07	0.282638	0.918	0.916	0.00570531	Btg1	D28	Liver
2.0692e-07	-0.342855	0.53	0.585	0.00644058	Eef1b2	D28	Liver
3.16075e-07	0.331404	0.598	0.4	0.00983815	Snrpg	D28	Liver
3.93327e-07	-0.302223	0.927	0.951	0.0122427	Actb	D28	Liver
3.939e-07	0.574446	0.457	0.284	0.0122605	Dnajb1	D28	Liver
6.65474e-07	0.368298	0.402	0.229	0.0207136	Add3	D28	Liver
7.65749e-07	-0.451986	0.215	0.296	0.0238347	Gm10076	D28	Liver
8.36171e-07	0.332938	0.744	0.562	0.0260267	Dcn	D28	Liver
1.00769e-06	0.496229	0.717	0.56	0.0313654	Hsp90aa1	D28	Liver
1.12872e-06	0.327902	0.411	0.242	0.0351325	Fam107b	D28	Liver
1.31366e-06	0.394726	0.47	0.289	0.040889	Hnrnpu	D28	Liver
1.90451e-06	0.302972	0.347	0.195	0.0592797	Ahsa1	D28	Liver
2.91291e-06	-0.253801	0.936	0.944	0.0906673	Rpl7	D28	Liver
3.39201e-06	0.357323	0.58	0.398	0.10558	Cd83	D28	Liver
4.79427e-06	0.4304	0.274	0.135	0.149226	Rpl27-ps3	D28	Liver
4.81048e-06	-0.420668	0.274	0.382	0.149731	Gm42418	D28	Liver
6.38227e-06	0.322544	0.699	0.524	0.198654	Cst3	D28	Liver
6.68774e-06	0.314664	0.265	0.135	0.208163	Lum	D28	Liver
7.16368e-06	0.360774	0.507	0.334	0.222977	Lcp1	D28	Liver
8.08604e-06	0.464499	0.352	0.201	0.251686	Fabp4	D28	Liver
8.46698e-06	-0.251741	0.808	0.845	0.263543	Rpl29	D28	Liver
1.37316e-05	-0.278315	0.566	0.615	0.42741	Cox7a2l	D28	Liver
1.64082e-05	0.340142	0.256	0.129	0.510722	Canx	D28	Liver
2.56632e-05	0.276233	0.406	0.258	0.798794	Cct5	D28	Liver
3.4966e-05	-0.325738	0.251	0.304	1	Cirbp	D28	Liver
4.07e-05	0.27751	0.324	0.195	1	Nop56	D28	Liver
4.35195e-05	-0.301725	0.557	0.63	1	Uqcrh	D28	Liver
4.57757e-05	-0.260205	0.352	0.383	1	Atp5g2	D28	Liver
5.11941e-05	0.254281	0.251	0.142	1	Prpf4b	D28	Liver
5.46718e-05	0.375466	0.648	0.513	1	Gm31243	D28	Liver
6.74351e-05	0.351202	0.301	0.17	1	Txnip	D28	Liver
6.81656e-05	0.329197	0.256	0.137	1	Smarca5	D28	Liver
6.94415e-05	-0.258749	0.311	0.334	1	Arhgdia	D28	Liver
7.29606e-05	0.273122	0.283	0.163	1	Srsf7	D28	Liver
7.48598e-05	0.267652	0.397	0.258	1	Sfpq	D28	Liver
7.87352e-05	0.367714	0.274	0.153	1	Stt3b	D28	Liver
7.89442e-05	0.290498	0.374	0.235	1	Selenof	D28	Liver
8.96673e-05	0.282636	0.393	0.258	1	Atp6v0b	D28	Liver
0.000124237	0.353941	0.274	0.155	1	Pi16	D28	Liver
0.000126643	0.359979	0.301	0.177	1	Hspd1	D28	Liver
0.000142272	-0.3669	0.292	0.397	1	Ppdpf	D28	Liver
0.000175711	-0.390388	0.178	0.273	1	AY036118	D28	Liver
0.000223115	0.315878	0.26	0.145	1	Selenop	D28	Liver
0.000403552	0.288274	0.868	0.785	1	Hsp90ab1	D28	Liver
0.000416423	0.351088	0.393	0.261	1	Satb1	D28	Liver
0.000692763	0.267622	0.301	0.189	1	Tmed5	D28	Liver
0.000777801	0.252279	0.616	0.483	1	Atp5b	D28	Liver
0.000904292	0.267852	0.306	0.192	1	Nfkbid	D28	Liver
0.000991431	0.252006	0.397	0.273	1	Tax1bp1	D28	Liver
0.0028878	0.253576	0.26	0.162	1	Chmp2a	D28	Liver
0.00313076	0.33065	0.338	0.229	1	Vps37b	D28	Liver
0.00531794	-0.315411	0.192	0.258	1	Tspan32	D28	Liver
0.0072239	0.268298	0.274	0.182	1	Cd22	D28	Liver
0.00822382	0.260913	0.406	0.301	1	Calr	D28	Liver
0.0138429	0.264479	0.269	0.182	1	Atp2b1	D28	Liver
0.0143106	-0.260685	0.237	0.289	1	Mtdh	D28	Liver
0.014434	0.261599	0.352	0.255	1	Tmod3	D28	Liver
0.0325479	0.387255	0.361	0.275	1	Jun	D28	Liver
0.0435416	-0.317847	0.324	0.366	1	Ifi27l2a	D28	Liver

## Sheet: FindMarkers_KidneyB_A
p_val	avg_logFC	pct.1	pct.2	p_val_adj	gene
3.3173e-33	4.78163	0.907	0	5.87726e-29	Spp1
6.1608e-07	2.54581	0.271	0	0.0109151	Ankrd1
1.41263e-09	2.43477	0.374	0	2.50275e-05	Ptgds
1.08946e-07	2.28363	0.467	0.058	0.0019302	Spink1
6.84621e-06	1.98816	0.318	0.019	0.121294	Aldob
8.66537e-13	1.98121	0.757	0.192	1.53524e-08	Tmem176b
7.74593e-06	1.9324	0.346	0.058	0.137235	Krt8
5.91331e-07	1.88611	0.467	0.096	0.0104766	Ldhb
7.28792e-08	1.88483	0.308	0	0.0012912	1700011H14Rik
1.45803e-06	1.87698	0.346	0.019	0.0258319	Car2
7.4398e-09	1.86471	0.477	0.038	0.000131811	Pdzk1ip1
3.58799e-10	1.83532	0.636	0.212	6.35684e-06	Dbi
2.81249e-05	1.78976	0.467	0.173	0.498289	Hbegf
6.1608e-07	1.74114	0.271	0	0.0109151	Col18a1
0.00011498	1.73115	0.346	0.096	1	Lgals3
1.69176e-22	1.703	0.953	0.442	2.9973e-18	Igfbp7
3.79123e-05	1.64391	0.364	0.058	0.671692	Rrad
1.74035e-06	1.64209	0.252	0	0.0308337	Fermt1
2.14016e-07	1.62366	0.29	0	0.00379173	Folr1
2.59864e-05	1.61551	0.327	0.038	0.460401	Cystm1
6.39951e-06	1.5941	0.318	0.019	0.11338	Spint2
1.74035e-06	1.53979	0.252	0	0.0308337	Npnt
2.36426e-05	1.49715	0.43	0.096	0.418876	Cox8a
5.96842e-08	1.48247	0.477	0.058	0.00105742	Cp
2.20547e-05	1.45026	0.402	0.077	0.390742	Cdh16
0.000118119	1.43753	0.336	0.058	1	Vcam1
5.06716e-08	1.43103	0.533	0.269	0.000897748	Gpx1
3.09569e-05	1.426	0.467	0.135	0.548463	Tsc22d1
7.72545e-06	1.42013	0.43	0.077	0.136872	Atp1b1
0.000247402	1.41614	0.29	0.038	1	Chchd10
0.000663454	1.41546	0.28	0.058	1	Osr2
2.40518e-06	1.4096	0.57	0.173	0.0426126	Tmem176a
1.17381e-06	1.39079	0.561	0.154	0.0207963	Ivns1abp
0.000218489	1.37523	0.327	0.058	1	Cox5a
1.44295e-05	1.37482	0.449	0.096	0.255648	Tmbim4
2.19385e-05	1.36971	0.374	0.058	0.388684	Adgrg1
4.84744e-05	1.35293	0.308	0.038	0.858822	Slc6a6
6.73517e-05	1.30684	0.495	0.192	1	Ndufa4
1.55162e-05	1.30444	0.757	0.558	0.2749	Gpx3
0.000205278	1.30189	0.393	0.096	1	Rida
7.59847e-05	1.29322	0.467	0.154	1	Atp5b
0.000267684	1.28815	0.271	0.038	1	Med28
0.000126635	1.26856	0.477	0.154	1	Clu
6.62747e-05	1.23852	0.486	0.154	1	Slc25a5
0.000447728	1.23693	0.477	0.192	1	Fxyd2
0.00159071	1.23277	0.271	0.058	1	Eno1
1.87412e-06	1.21518	0.589	0.269	0.0332038	Atpif1
0.000208969	1.20888	0.327	0.058	1	Marc2
0.00134181	1.19347	0.43	0.173	1	Id2
0.000550925	1.19104	0.308	0.058	1	Pcbd1
0.00331437	1.1904	0.299	0.077	1	Cd24a
9.02697e-06	1.16024	0.533	0.154	0.159931	Atp5c1
1.80752e-05	1.14996	0.626	0.327	0.320238	Gabarapl1
1.50317e-05	1.12276	0.645	0.327	0.266317	Cox4i1
0.000848813	1.12145	0.262	0.038	1	Cd74
4.43856e-05	1.11923	0.355	0.058	0.78638	Ndufb2
0.0227271	1.11198	0.299	0.154	1	mt-Nd5
0.00213195	1.10897	0.402	0.154	1	Sdc4
0.000457834	1.10665	0.346	0.077	1	Uqcrfs1
0.00152533	1.09263	0.346	0.096	1	Cox7a2
0.00120827	1.08984	0.252	0.038	1	F11r
0.000877683	1.08677	0.346	0.096	1	Ndufs6
0.000117176	1.08154	0.71	0.442	1	Ly6e
0.00481592	1.07157	0.355	0.154	1	Atp5j
0.00020378	1.05709	0.393	0.096	1	Glyat
0.00183537	1.04279	0.43	0.173	1	Cstb
0.000898917	1.04222	0.364	0.115	1	Gng12
0.00767418	1.03855	0.271	0.077	1	Ndufc2
0.00170996	1.03763	0.28	0.115	1	Uqcrh
0.00446966	1.01857	0.374	0.135	1	Vamp8
0.00302641	1.01019	0.346	0.115	1	Tmbim6
7.6638e-05	1.00718	0.495	0.154	1	Atp5o
0.0042777	0.996646	0.262	0.058	1	Psmd11
0.00374437	0.996246	0.364	0.135	1	Park7
0.0290444	0.993024	0.252	0.096	1	Gadd45a
0.00010018	0.986475	0.626	0.308	1	Hint1
0.00520491	0.979629	0.374	0.135	1	Tmem27
0.0377765	0.960516	0.458	0.269	1	Cxcl10
0.000287614	0.954425	0.551	0.231	1	Cox6b1
8.39324e-06	0.946873	0.701	0.327	0.148703	Cox7c
0.0128448	0.937163	0.271	0.115	1	Psme1
0.000269752	0.936017	0.598	0.269	1	Uqcr10
0.00267897	0.931111	0.542	0.288	1	Cox6c
0.00430552	0.928163	0.327	0.115	1	Hsbp1
0.000573558	0.924062	0.364	0.096	1	Cyba
0.0266959	0.914658	0.299	0.154	1	Gapdh
0.000113375	0.892653	0.645	0.308	1	Apoe
0.0204419	0.891403	0.271	0.096	1	Snrpg
0.00628324	0.885571	0.336	0.115	1	App
0.010759	0.885107	0.43	0.212	1	Cox6a1
0.0273961	0.863437	0.355	0.173	1	Cox7b
0.0262247	0.851637	0.336	0.154	1	Malat1
0.0152783	0.837998	0.29	0.096	1	Sdhc
0.000139787	0.837541	0.533	0.192	1	Atp6v1f
0.039154	0.830639	0.252	0.096	1	Ndufb9
0.0146235	0.829936	0.393	0.192	1	Psma7
0.000646527	0.823601	0.327	0.077	1	Cxcl16
0.0348961	0.812354	0.262	0.096	1	Ndufa1
0.0143365	0.802318	0.29	0.096	1	Arpc3
0.0529527	0.798942	0.374	0.212	1	mt-Nd1
0.0114148	0.796662	0.467	0.25	1	Slc25a3
0.0153956	0.793756	0.411	0.212	1	Clic1
0.0052695	0.791905	0.318	0.096	1	2410015M20Rik
0.129568	0.788082	0.29	0.154	1	mt-Co1
0.0007347	0.787828	0.57	0.288	1	Ptma
0.015831	0.781585	0.393	0.173	1	Gpx4
0.000197796	0.777314	0.607	0.269	1	Mpc2
0.0130781	0.775321	0.458	0.25	1	Atox1
0.0103452	0.769808	0.355	0.135	1	Ndufb11
0.0621197	0.753793	0.271	0.115	1	Ezr
0.0131611	0.748742	0.374	0.154	1	Ndufa7
0.00645792	0.746923	0.495	0.25	1	Atp5j2
0.0415558	0.745635	0.383	0.192	1	Ifi27
0.0608077	0.743318	0.271	0.115	1	Nop10
0.0591645	0.742294	0.29	0.135	1	Atp6v1g1
0.0131547	0.733353	0.252	0.077	1	Idh3g
0.00305749	0.733204	0.29	0.077	1	Hcfc1r1
0.022209	0.733178	0.327	0.135	1	Ndufb5
0.163835	0.731005	0.271	0.154	1	mt-Nd2
0.00200048	0.726028	0.495	0.212	1	Tagln2
0.0183996	0.720489	0.28	0.096	1	Atp6v1a
0.028459	0.718091	0.299	0.115	1	Taldo1
0.00323992	0.708604	0.617	0.346	1	Myl6
0.00841973	0.698822	0.477	0.231	1	Ndufb8
0.0763753	0.697468	0.28	0.135	1	Eif3h
0.0386682	0.694624	0.383	0.192	1	Mif
0.0115918	0.690773	0.458	0.231	1	Ctsd
0.00193863	0.685559	0.262	0.058	1	Myl12b
0.00102049	0.675295	0.729	0.538	1	Cd63
0.0270052	0.673377	0.393	0.212	1	Ubl5
0.0025033	0.671232	0.467	0.192	1	Uqcr11
0.0165007	0.656235	0.28	0.096	1	Plscr2
0.0470805	0.654028	0.29	0.231	1	Lmna
6.97955e-05	0.653403	0.299	0.058	1	Calml4
0.000817872	0.652321	0.748	0.538	1	H2-K1
0.0415746	0.649274	0.439	0.25	1	Ndrg1
0.0998454	0.646118	0.271	0.192	1	Akr1a1
0.0196737	0.643637	0.533	0.308	1	2010107E04Rik
0.00728751	0.634557	0.636	0.385	1	Usmg5
0.00795414	0.632782	0.411	0.173	1	Aldoa
0.0392829	0.632441	0.364	0.173	1	S100a1
0.0609159	0.624931	0.346	0.173	1	Suclg1
0.153289	0.618385	0.262	0.135	1	Tecr
0.0274405	0.610166	0.523	0.346	1	Rps27l
0.0874585	0.594813	0.262	0.115	1	Nedd8
0.100404	0.594354	0.523	0.346	1	Actg1
0.185442	0.588442	0.28	0.154	1	Pnrc1
0.0121371	0.58748	0.645	0.404	1	Hspe1
0.0245687	0.585144	0.318	0.135	1	Klf6
0.177809	0.578115	0.28	0.173	1	Atp5a1
0.0193158	0.563425	0.421	0.404	1	Atf3
0.0668028	0.552433	0.271	0.115	1	Cd151
0.108202	0.54389	0.252	0.115	1	Esd
0.0187234	0.528621	0.327	0.135	1	mt-Cytb
0.248989	0.527055	0.29	0.192	1	Ywhaq
0.209409	0.524967	0.252	0.192	1	Rab11a
0.0534734	0.50645	0.486	0.288	1	Ndufa3
0.153222	0.503667	0.458	0.308	1	Atp5h
0.042939	0.497224	0.495	0.288	1	Ndufa6
0.0920565	0.48892	0.467	0.288	1	Dad1
0.140989	0.487095	0.318	0.173	1	Nme1
0.0277262	0.48469	0.467	0.25	1	Ndufb6
0.0345838	0.482485	0.794	0.635	1	Rps16
0.151803	0.47897	0.355	0.212	1	Atp5g3
0.292431	0.474461	0.262	0.154	1	Rtn4
0.0290495	0.471703	0.458	0.25	1	Ppia
0.0949451	0.471592	0.28	0.135	1	Ndufb10
0.059661	0.469705	0.374	0.192	1	Ndufa12
0.0580937	0.467461	0.626	0.442	1	Sec62
0.33606	0.46287	0.262	0.192	1	Jund
0.07727	0.457898	0.495	0.308	1	Atp5g1
0.128972	0.444895	0.411	0.25	1	Ybx1
0.124049	0.438096	0.467	0.423	1	Ier3
0.154899	0.433992	0.336	0.192	1	Edf1
0.449362	0.433321	0.262	0.173	1	Gsta2
0.233875	0.433248	0.327	0.25	1	Ptms
0.0549928	0.429203	0.579	0.385	1	Anxa5
0.216913	0.428984	0.467	0.327	1	Atp5e
0.18583	0.427629	0.299	0.173	1	mt-Nd4
0.191286	0.425909	0.393	0.327	1	Myl12a
0.215593	0.425577	0.252	0.135	1	Ndufv3
0.0192767	0.421893	0.252	0.096	1	Sod2
0.239734	0.417701	0.271	0.154	1	Ppp1ca
0.107015	0.417366	0.439	0.269	1	Ldha
0.0899665	0.413199	0.374	0.212	1	Swi5
0.372193	0.411918	0.364	0.288	1	Lamp1
0.412171	0.409513	0.262	0.173	1	Uqcrb
0.241558	0.397448	0.271	0.154	1	Ywhae
0.0657051	0.396533	0.589	0.577	1	Itm2b
0.371549	0.393812	0.308	0.231	1	Spcs1
0.367519	0.391935	0.28	0.192	1	Oat
0.237655	0.390362	0.318	0.192	1	Smdt1
0.340206	0.38321	0.439	0.346	1	Uqcrq
0.149608	0.382005	0.336	0.192	1	Calr
0.19095	0.381877	0.43	0.288	1	Ndufa13
0.464636	0.372079	0.271	0.192	1	Cox20
0.0691583	0.36402	0.252	0.115	1	Eif3m
0.434241	0.358814	0.28	0.192	1	Psma1
0.278585	0.35622	0.393	0.308	1	Eif5
0.479405	0.354814	0.29	0.212	1	Pcbp1
0.651234	0.332766	0.598	0.538	1	Sqstm1
0.228965	0.330133	0.449	0.308	1	Atp1a1
0.22144	0.325105	0.364	0.231	1	Ghitm
0.18592	0.324338	0.514	0.365	1	Rpl27
0.11204	0.321586	0.364	0.212	1	Tspo
0.12343	0.321092	0.495	0.327	1	Atp5f1
0.110361	0.320442	0.299	0.154	1	Prdx2
0.243924	0.319053	0.673	0.538	1	Hsp90ab1
0.765401	0.315322	0.458	0.481	1	Hsp90aa1
0.133658	0.31449	0.514	0.346	1	Rpl15
0.465398	0.311623	0.28	0.192	1	Rbm39
0.143548	0.310086	0.794	0.654	1	B2m
0.125161	0.309473	0.364	0.212	1	Tspan3
0.646663	0.308295	0.383	0.365	1	Tnfrsf12a
0.216456	0.304727	0.43	0.288	1	Elob
0.0532727	0.304038	0.393	0.231	1	Ndufc1
0.321309	0.300867	0.28	0.173	1	Txndc17
0.447768	0.300527	0.43	0.327	1	Atp5k
0.273804	0.300174	0.262	0.154	1	Rab14
0.23023	0.294598	0.29	0.173	1	Snx3
0.168867	0.291502	0.327	0.192	1	Gng5
0.549321	0.288782	0.262	0.192	1	Psmb6
0.222591	0.285442	0.252	0.269	1	Prdx1
0.134617	0.285334	0.402	0.25	1	Pfdn5
0.0819059	0.284537	0.252	0.135	1	Cnpy2
0.157805	0.284363	0.346	0.212	1	Tpi1
0.953745	0.27767	0.271	0.269	1	Cdkn1a
0.714864	0.276994	0.271	0.212	1	Lamp2
0.0354065	0.276653	0.551	0.346	1	H3f3b
0.545838	0.275515	0.318	0.25	1	Cdc42
0.561241	0.273239	0.467	0.385	1	Slc25a4
0.299903	0.272068	0.495	0.365	1	Txn1
0.0391635	0.266277	0.271	0.135	1	Srsf2
0.64052	0.26155	0.458	0.404	1	Nfkbia
0.420541	0.260401	0.439	0.346	1	Ndufa5
0.364736	0.258463	0.71	0.654	1	Gstm1
0.313909	0.257756	0.411	0.288	1	Hmgn1
0.370118	0.25657	0.271	0.173	1	Atp6v0e
0.20594	0.252242	0.682	0.538	1	Rpl18
0.200025	-0.256903	0.636	0.731	1	Rpl23
0.195644	-0.259481	0.308	0.288	1	Cyr61
0.300156	-0.270899	0.28	0.404	1	Calm2
0.363414	-0.275886	0.327	0.442	1	Hspb1
0.743326	-0.283998	0.215	0.269	1	Sat1
0.278501	-0.284527	0.542	0.615	1	Rpl35
0.144891	-0.288361	0.607	0.596	1	Rpl31
0.106849	-0.290143	0.626	0.788	1	Rpl36
0.202699	-0.293207	0.421	0.558	1	Id3
0.100947	-0.296842	0.551	0.615	1	Gnas
0.735333	-0.30289	0.215	0.269	1	Reep5
0.15845	-0.303625	0.738	0.808	1	Ftl1
0.624911	-0.306044	0.206	0.269	1	Rps6
0.0875904	-0.311899	0.589	0.654	1	Rpl32
0.21102	-0.314038	0.589	0.654	1	Rps29
0.461447	-0.316602	0.383	0.462	1	Psap
0.14962	-0.316716	0.15	0.269	1	Ckb
0.0673557	-0.316958	0.654	0.769	1	Rps5
0.0916468	-0.335223	0.533	0.712	1	Rps8
0.519197	-0.33866	0.206	0.269	1	Ppib
0.52315	-0.340547	0.299	0.365	1	Eif5a
0.141005	-0.342361	0.336	0.5	1	Dnaja1
0.0125893	-0.342385	0.673	0.865	1	Rplp1
0.127353	-0.351511	0.617	0.635	1	Rps13
0.0525288	-0.358374	0.589	0.596	1	Rps4x
0.0246978	-0.358412	0.495	0.5	1	Laptm4a
0.0324046	-0.369701	0.794	0.904	1	Rps3a1
0.157145	-0.376681	0.393	0.462	1	Map1lc3b
0.303811	-0.378355	0.477	0.596	1	Fth1
0.139507	-0.385788	0.514	0.654	1	Rpl26
0.401013	-0.396034	0.318	0.404	1	Eef1g
0.052662	-0.401023	0.514	0.615	1	Rps18
0.0797866	-0.405132	0.57	0.712	1	Rps15
0.264501	-0.40936	0.29	0.327	1	P4hb
0.222452	-0.416503	0.168	0.288	1	Fkbp1a
0.0581922	-0.419919	0.327	0.365	1	Jun
0.0340547	-0.421723	0.57	0.712	1	Rpl18a
0.0144387	-0.433339	0.626	0.712	1	Ddx5
0.00775172	-0.435717	0.551	0.673	1	Rpl9
0.151825	-0.451489	0.14	0.269	1	Ccnl1
0.45558	-0.452378	0.234	0.308	1	Ncl
0.00404604	-0.458094	0.598	0.769	1	Rps20
0.00330838	-0.4664	0.654	0.769	1	Rpsa
0.0859023	-0.473998	0.215	0.269	1	Cd164
0.000190721	-0.487662	0.776	0.904	1	Rps26
0.0304242	-0.495172	0.542	0.635	1	Tpt1
0.327385	-0.495756	0.299	0.288	1	Hspa1a
0.135679	-0.499295	0.224	0.308	1	Wsb1
0.0699395	-0.499295	0.402	0.577	1	Rps28
0.289161	-0.517364	0.178	0.288	1	Zfand5
0.020446	-0.518916	0.523	0.577	1	Rps15a
0.0550433	-0.520412	0.364	0.558	1	Hspa5
0.116536	-0.531481	0.336	0.423	1	Egr1
0.00915591	-0.539199	0.636	0.731	1	Hspa8
0.0112344	-0.589413	0.393	0.577	1	Rpl10a
0.153605	-0.590765	0.196	0.288	1	Mgst1
0.0264989	-0.604042	0.262	0.365	1	Npc2
0.000205304	-0.60912	0.636	0.769	1	Rpl10
0.11411	-0.616265	0.196	0.346	1	Selenop
0.0744947	-0.630795	0.336	0.5	1	Eif2s2
0.0865208	-0.64661	0.262	0.385	1	Sub1
0.00622123	-0.653761	0.486	0.596	1	Dnajb1
0.116204	-0.65697	0.178	0.308	1	Gdi2
0.180968	-0.668297	0.15	0.269	1	Hsph1
0.0133576	-0.673215	0.439	0.577	1	C3
0.00901577	-0.68353	0.271	0.5	1	Pabpc1
2.71866e-05	-0.690499	0.654	0.731	0.481664	Rpl13
0.0801014	-0.690576	0.224	0.346	1	Krtcap2
0.0273238	-0.706288	0.271	0.404	1	Eif4a1
0.0212082	-0.713706	0.121	0.308	1	Eif4e
0.038847	-0.728716	0.159	0.327	1	Gpc3
0.00205061	-0.734462	0.15	0.404	1	Vim
0.0170743	-0.744735	0.131	0.327	1	Hspa1b
0.0047145	-0.747127	0.252	0.462	1	Dusp1
0.0311249	-0.759572	0.234	0.308	1	Junb
0.00915375	-0.76584	0.243	0.481	1	Fosb
0.00954692	-0.785357	0.234	0.404	1	Hes1
0.00509062	-0.786197	0.271	0.481	1	Zfp36
7.01488e-06	-0.787445	0.617	0.808	0.124283	Rps12
0.0493938	-0.814477	0.14	0.269	1	Rpl7a
0.00238382	-0.815526	0.15	0.404	1	Arf4
0.00296705	-0.839861	0.467	0.558	1	Cst3
0.0330094	-0.841368	0.15	0.288	1	Pim1
0.032017	-0.866325	0.159	0.327	1	Anxa3
0.0145463	-0.884697	0.187	0.346	1	Raly
0.00383911	-0.890451	0.206	0.404	1	Mat2a
5.44447e-05	-0.892991	0.393	0.596	0.964597	Gadd45g
0.00135617	-0.911428	0.14	0.404	1	Emp1
3.38551e-05	-0.929055	0.271	0.596	0.599812	Serpinh1
0.00144352	-0.938433	0.103	0.346	1	Aebp1
0.00368929	-0.968995	0.093	0.308	1	Lpl
0.00594177	-0.972123	0.103	0.288	1	Nop58
0.00226136	-1.00103	0.075	0.288	1	Fgfr1
0.00353942	-1.00483	0.084	0.269	1	Nptn
1.47325e-08	-1.02594	0.458	0.788	0.000261016	Tmsb10
0.000310941	-1.07587	0.243	0.462	1	Phlda1
0.000960051	-1.11934	0.065	0.288	1	Top1
0.000673513	-1.12564	0.084	0.269	1	Rap1b
0.00018912	-1.13506	0.112	0.404	1	Cebpd
0.00010693	-1.15562	0.112	0.404	1	Nbl1
0.000515173	-1.20583	0.121	0.385	1	Ifitm2
0.00705197	-1.23115	0.103	0.269	1	Bag3
2.8808e-05	-1.25282	0.168	0.481	0.510391	Crip1
0.000955533	-1.26766	0.075	0.308	1	Klf2
0.000669652	-1.33099	0.065	0.288	1	Ecm1
0.000342309	-1.35697	0.065	0.288	1	Fxyd1
1.31661e-08	-1.36168	0.243	0.692	0.000233263	Lgals1
8.73634e-05	-1.36394	0.047	0.288	1	Rcn3
4.45187e-21	-1.40361	0.682	1	7.88738e-17	Sparc
8.8598e-06	-1.42125	0.019	0.269	0.156969	Col14a1
5.13358e-08	-1.4624	0.364	0.712	0.000909516	Hmox1
1.4187e-05	-1.46799	0.075	0.365	0.251352	Pnp
0.000168383	-1.47299	0.065	0.308	1	Uap1
9.44071e-07	-1.50034	0.215	0.558	0.0167261	Prss23
7.18989e-05	-1.50804	0.206	0.538	1	Cxcl1
1.13202e-07	-1.55787	0.15	0.577	0.0020056	Ly6a
2.13324e-05	-1.5733	0.093	0.385	0.377946	Fstl1
3.7214e-07	-1.59195	0.028	0.346	0.0065932	Crispld2
1.19886e-06	-1.59287	0.009	0.269	0.0212402	Axl
2.10126e-08	-1.63248	0.121	0.558	0.000372281	Ly6c1
2.2201e-07	-1.65185	0.019	0.327	0.00393334	Sparcl1
7.17178e-10	-1.66984	0.168	0.654	1.27062e-05	Tmsb4x
1.23869e-06	-1.69894	0.065	0.404	0.0219459	Igfbp4
2.42088e-07	-1.70051	0.093	0.462	0.00428906	Plpp3
6.16582e-08	-1.70232	0.019	0.346	0.0010924	Col6a1
1.01707e-08	-1.73606	0	0.269	0.000180195	Adamts2
5.53289e-08	-1.76431	0.019	0.346	0.000980262	Anxa1
6.39834e-10	-1.77537	0	0.308	1.13359e-05	Scara5
1.99227e-07	-1.77735	0.019	0.327	0.00352971	Ifi27l2a
1.01707e-08	-1.80492	0	0.269	0.000180195	Nid1
5.53275e-09	-1.82854	0.037	0.423	9.80237e-05	C1s1
1.56877e-14	-1.83212	0.271	0.827	2.77938e-10	Ifitm3
4.91968e-17	-1.83276	0.187	0.846	8.7162e-13	S100a6
6.37945e-09	-1.86196	0.009	0.346	0.000113025	Mmp2
2.09239e-07	-1.87447	0.019	0.327	0.0037071	Cd34
2.23646e-05	-1.89718	0.028	0.269	0.396234	Adh1
2.57461e-09	-1.94189	0	0.288	4.56144e-05	Dpep1
9.28782e-09	-1.95373	0.019	0.365	0.000164552	Gfpt2
1.43515e-11	-1.95814	0.084	0.558	2.54266e-07	Timp2
1.55968e-10	-1.98429	0	0.327	2.76328e-06	Lrrn4cl
6.39834e-10	-1.98486	0	0.308	1.13359e-05	Pcolce2
5.61477e-10	-1.98957	0.056	0.481	9.94769e-06	Pcolce
1.59358e-07	-2.0022	0.009	0.269	0.00282334	Fn1
3.67498e-09	-2.04558	0.019	0.385	6.51096e-05	Rarres2
2.57461e-09	-2.05513	0	0.288	4.56144e-05	Smoc2
7.90457e-09	-2.14528	0.065	0.481	0.000140045	Hk2
1.01707e-08	-2.14788	0	0.269	0.000180195	Ifi205
1.09845e-12	-2.1708	0.112	0.673	1.94613e-08	Mt1
1.10128e-11	-2.23814	0.047	0.519	1.95114e-07	Rnase4
5.30904e-10	-2.2581	0.019	0.404	9.40602e-06	Dpt
4.57652e-09	-2.37854	0.009	0.346	8.10822e-05	Ccl7
1.00105e-12	-2.42111	0.019	0.481	1.77355e-08	Serpinf1
4.29202e-15	-2.53023	0	0.462	7.60417e-11	Meg3
6.3479e-07	-2.58027	0.009	0.269	0.0112466	Ccl2
4.33977e-13	-2.67916	0.093	0.596	7.68876e-09	Mt2
9.33173e-12	-2.70706	0.037	0.481	1.6533e-07	Ugdh
1.27178e-17	-2.74496	0.009	0.596	2.25321e-13	Col1a1
3.26392e-19	-2.79447	0.047	0.712	5.78268e-15	Serping1
3.20406e-14	-3.0938	0.009	0.5	5.67663e-10	Pi16
3.22377e-17	-3.0995	0	0.519	5.71156e-13	Mfap5
1.05739e-18	-3.13286	0	0.558	1.87338e-14	Clec3b
1.69311e-19	-3.13728	0.009	0.635	2.99969e-15	Lum
1.30201e-24	-3.13802	0.028	0.788	2.30677e-20	Ogn
4.29202e-15	-3.15383	0	0.462	7.60417e-11	Tnfaip6
3.48298e-20	-3.21248	0.009	0.654	6.1708e-16	Col3a1
2.49492e-23	-3.37646	0.019	0.731	4.42025e-19	Igfbp6
7.59215e-12	-3.43693	0.047	0.462	1.3451e-07	Mgp
5.0064e-26	-3.51144	0.019	0.788	8.86984e-22	Col1a2
1.23562e-38	-3.95471	0.075	0.981	2.18915e-34	Gsn
1.93577e-46	-4.66314	0.056	1	3.4296e-42	Dcn

## Sheet: FindMarkers_LungA_C
p_val	avg_logFC	pct.1	pct.2	p_val_adj	gene
2.16735e-38	-3.40915	0.224	0.975	3.83989e-34	Dcn
3.35826e-30	-3.25868	0	0.869	5.94983e-26	Clec3b
8.83446e-21	-2.94759	0	0.705	1.5652e-16	Serpinf1
6.37168e-20	-2.84541	0.02	0.73	1.12887e-15	Cygb
1.43242e-15	-2.67382	0.02	0.648	2.53782e-11	Adh1
6.90765e-20	-2.62736	0.061	0.803	1.22383e-15	Igfbp4
6.08163e-15	-2.61152	0	0.557	1.07748e-10	Pi16
1.3387e-13	-2.40724	0.041	0.607	2.37178e-09	Gpc3
1.68742e-13	-2.30172	0.02	0.59	2.9896e-09	C3
1.34027e-08	-2.22347	0.061	0.5	0.000237456	Mfap4
2.16598e-15	-2.1715	0.163	0.795	3.83746e-11	Inmt
4.36538e-36	-2.16956	0.816	1	7.73415e-32	Gsn
1.29168e-08	-2.14683	0.02	0.434	0.000228847	Rbp4
1.26869e-21	-2.1327	0.367	0.959	2.24774e-17	Col1a2
1.50508e-11	-2.07952	0	0.451	2.66656e-07	Cfh
4.17832e-15	-2.01756	0.286	0.852	7.40273e-11	Col1a1
3.69836e-13	-1.98557	0.041	0.623	6.55239e-09	Mmp2
3.11302e-22	-1.96964	0.327	0.967	5.51533e-18	Serping1
1.34264e-11	-1.94119	0.082	0.639	2.37875e-07	Ly6a
4.52149e-11	-1.93658	0	0.434	8.01072e-07	Htra3
2.02643e-09	-1.90791	0.061	0.541	3.59022e-05	Cxcl12
8.91115e-09	-1.90635	0.02	0.434	0.000157879	Dpep1
6.83318e-09	-1.85562	0.122	0.607	0.000121063	Nbl1
8.35821e-16	-1.82405	0.102	0.77	1.48082e-11	Pcolce
1.89353e-10	-1.74128	0.041	0.541	3.35476e-06	Cd34
1.18664e-12	-1.73346	0.082	0.672	2.10238e-08	Fbln1
3.69582e-11	-1.67459	0.143	0.705	6.54789e-07	Dpt
1.81911e-09	-1.67012	0.102	0.598	3.22291e-05	C1ra
2.10242e-08	-1.64674	0	0.336	0.000372486	Abca8a
6.1605e-05	-1.58671	0.061	0.361	1	C4b
8.95954e-07	-1.57119	0.122	0.525	0.0158736	Ftl1
1.21625e-08	-1.55515	0.061	0.516	0.000215483	Col14a1
5.67858e-13	-1.54647	0.531	0.934	1.00607e-08	Sparc
2.98645e-07	-1.542	0.02	0.377	0.00529109	Efemp1
1.14712e-11	-1.5152	0.102	0.672	2.03235e-07	Rbp1
5.55686e-07	-1.50039	0	0.279	0.0098451	Ccdc80
8.76821e-08	-1.47659	0	0.311	0.00155346	Scara5
8.73213e-07	-1.44559	0	0.27	0.0154707	Col15a1
9.10473e-07	-1.44352	0.143	0.549	0.0161308	Igfbp6
8.56807e-13	-1.4292	0.163	0.77	1.51801e-08	Mfap5
9.09338e-07	-1.42914	0.061	0.443	0.0161107	Olfml3
4.99616e-11	-1.41323	0.122	0.68	8.8517e-07	C1s1
4.75042e-05	-1.39513	0.02	0.27	0.841632	Pid1
1.27058e-14	-1.38166	0.306	0.902	2.25109e-10	Ctsl
8.63711e-05	-1.35762	0.02	0.262	1	Fbln5
1.97968e-07	-1.34271	0.082	0.5	0.0035074	Gas6
1.62864e-06	-1.28759	0.061	0.434	0.0288546	Phlda1
1.18347e-09	-1.27375	0.571	0.926	2.09676e-05	Col3a1
3.19282e-05	-1.26889	0.02	0.295	0.565673	Lrpap1
2.13283e-06	-1.24409	0	0.254	0.0377873	Tspan11
4.8419e-05	-1.2358	0.041	0.328	0.85784	Serpina3n
7.28706e-06	-1.22436	0.184	0.566	0.129105	Aebp1
0.00293638	-1.19593	0.204	0.459	1	Dnajb1
0.000403472	-1.19096	0.041	0.287	1	Slc43a3
2.36873e-05	-1.188	0.02	0.295	0.419668	Entpd2
1.71438e-09	-1.16836	0.184	0.705	3.03737e-05	Rnase4
7.36183e-08	-1.16196	0.143	0.607	0.0013043	Pmp22
6.58577e-08	-1.14782	0.02	0.377	0.0011668	Fkbp7
0.000197408	-1.14732	0.02	0.254	1	Clec11a
1.75126e-05	-1.13363	0.041	0.344	0.310271	Selenom
3.21559e-07	-1.10481	0.102	0.516	0.00569707	Adamts2
1.85039e-06	-1.09128	0.102	0.492	0.0327834	Pdia3
0.00146733	-1.08596	0.061	0.295	1	Ms4a4d
0.000158274	-1.07608	0.061	0.336	1	Meg3
5.30377e-05	-1.07445	0.041	0.328	0.93967	Pdlim2
2.38516e-05	-1.06572	0.061	0.377	0.422578	Scpep1
8.95079e-07	-1.0558	0.143	0.566	0.0158581	Tuba1a
0.000975204	-1.04363	0.082	0.336	1	Vat1
1.31324e-05	-1.03887	0.02	0.287	0.232667	Emp1
0.000178786	-1.01955	0.082	0.377	1	Gpx8
0.00149354	-1.01006	0.041	0.254	1	Pdgfra
0.000103684	-0.99979	0.102	0.418	1	Krtcap2
6.73253e-06	-0.986342	0.102	0.459	0.11928	Col6a2
3.21793e-08	-0.950337	0.184	0.656	0.00057012	S100a10
0.00421871	-0.947996	0.082	0.303	1	Pltp
3.67676e-05	-0.934698	0.122	0.467	0.651411	Bsg
2.16918e-05	-0.931494	0.143	0.508	0.384314	Cd302
0.000441608	-0.927631	0.082	0.352	1	Rcn1
0.00292087	-0.915142	0.061	0.279	1	Sri
1.69035e-11	-0.915075	0.306	0.861	2.9948e-07	Serpinh1
0.000669005	-0.864056	0.102	0.377	1	Tmed3
0.000558388	-0.802238	0.122	0.41	1	Lamp2
0.0207025	-0.798142	0.143	0.344	1	Ifi27l2a
0.00770566	-0.793876	0.061	0.254	1	Sec13
0.000119549	-0.792483	0.061	0.328	1	Dap
0.0180238	-0.783292	0.082	0.262	1	Rab7
0.0181147	-0.782298	0.082	0.262	1	Nfib
6.55755e-05	-0.768517	0.51	0.82	1	Bgn
0.00355514	-0.765697	0.061	0.262	1	Fbn1
0.000139369	-0.762498	0.122	0.434	1	Mgst1
0.00288485	-0.750544	0.082	0.303	1	Osr1
9.51386e-08	-0.748091	0.633	0.943	0.00168557	Itm2b
0.00027111	-0.746911	0.918	0.975	1	Mgp
0.00307757	-0.735759	0.184	0.451	1	Calr
7.22684e-05	-0.734584	0.327	0.689	1	Apoe
0.0256856	-0.724846	0.082	0.254	1	Sra1
0.000742416	-0.717611	0.122	0.402	1	Ssr4
0.00481262	-0.706238	0.143	0.385	1	Fcgrt
0.0247267	-0.693514	0.49	0.672	1	Id3
0.00482612	-0.693209	0.082	0.295	1	Ergic3
0.00078588	-0.692383	0.286	0.598	1	Timp2
0.000182744	-0.689383	0.102	0.377	1	Rpn2
8.26773e-05	-0.682868	0.286	0.648	1	Pcolce2
0.0138726	-0.674554	0.163	0.385	1	Mxra8
0.00035516	-0.660118	0.061	0.287	1	Atp1a2
0.00327859	-0.658347	0.061	0.262	1	Mtch1
0.0010019	-0.653889	0.163	0.443	1	Il11ra1
0.0170598	-0.644083	0.143	0.352	1	Tnxb
0.0148512	-0.642493	0.143	0.352	1	Lrp1
0.00635211	-0.625763	0.163	0.393	1	Dbi
0.0025624	-0.620311	0.286	0.574	1	Col6a1
0.0225201	-0.617609	0.082	0.254	1	Tceal8
0.00453699	-0.616017	0.102	0.32	1	Npc2
3.36219e-06	-0.61175	0.449	0.836	0.0595679	Timp3
0.00269344	-0.60843	0.449	0.73	1	Fth1
0.011083	-0.602838	0.143	0.361	1	Serpinb6a
0.00192994	-0.59691	0.184	0.451	1	Arf4
0.0787668	-0.593968	0.184	0.352	1	Socs3
0.00050736	-0.590719	0.163	0.451	1	Pdia6
0.0073221	-0.586002	0.143	0.369	1	Oat
0.000528541	-0.582899	0.306	0.623	1	Rps17
0.0026804	-0.579695	0.204	0.475	1	Ppib
0.00441521	-0.572528	0.082	0.287	1	Tpst1
6.94035e-06	-0.562691	0.816	0.959	0.122962	Igfbp7
0.000841357	-0.562608	0.061	0.27	1	Col5a2
0.00151542	-0.562104	0.082	0.295	1	Hspa1b
0.000542823	-0.551234	0.449	0.762	1	Cst3
0.0190486	-0.549992	0.082	0.254	1	Ostc
0.000649415	-0.548686	0.061	0.27	1	Igf1
0.00388606	-0.538019	0.245	0.516	1	Rcn3
0.00229679	-0.531729	0.306	0.59	1	Ifitm2
0.00593688	-0.52713	0.102	0.303	1	Zbtb20
4.17357e-05	-0.525706	0.408	0.77	0.739432	S100a11
0.0537253	-0.521698	0.122	0.287	1	Hexb
0.03192	-0.521137	0.184	0.377	1	Ecm1
0.0553043	-0.52031	0.102	0.254	1	Manf
0.00115415	-0.50814	0.429	0.73	1	Rarres2
0.00795394	-0.495666	0.102	0.295	1	Colec12
0.00933028	-0.488879	0.265	0.508	1	Plpp3
0.023732	-0.487452	0.102	0.27	1	Ppic
0.000271779	-0.483315	0.184	0.467	1	Htra1
0.000316174	-0.479102	0.51	0.82	1	Cd63
0.0318096	-0.475279	0.102	0.262	1	Mt2
0.0630452	-0.463179	0.143	0.303	1	Cd164
0.0149977	-0.456723	0.449	0.689	1	Ier2
0.00125098	-0.454182	0.122	0.352	1	Lhfp
0.0667482	-0.449797	0.163	0.328	1	Rrbp1
0.091189	-0.445387	0.122	0.27	1	Tm2d2
0.0777766	-0.438092	0.122	0.27	1	Sod1
0.000391422	-0.434219	0.306	0.607	1	Selenop
0.00651508	-0.430571	0.49	0.746	1	Gstm1
0.0122107	-0.425655	0.306	0.549	1	P4hb
0.00136479	-0.422987	0.592	0.852	1	S100a6
0.000267748	-0.420571	0.327	0.639	1	Ltbp4
0.0161303	-0.420315	0.143	0.344	1	Prdx4
0.0360032	-0.406444	0.143	0.311	1	Nenf
0.0212295	-0.399339	0.327	0.549	1	Sec62
0.111201	-0.397442	0.184	0.336	1	Vkorc1
1.50986e-06	-0.396874	0.265	0.631	0.0267501	Psap
0.161844	-0.395159	0.163	0.295	1	Atf3
0.0188839	-0.389811	0.204	0.402	1	Loxl1
0.125917	-0.384429	0.143	0.279	1	Sptbn1
0.00021783	-0.383323	0.224	0.525	1	Rps10
0.0182124	-0.380258	0.184	0.377	1	Selenok
0.0551781	-0.380211	0.265	0.459	1	B2m
0.188094	-0.379499	0.143	0.262	1	Gm4149
0.00575757	-0.377227	0.245	0.484	1	Gstm2
0.00922106	-0.36555	0.204	0.418	1	Eef1g
0.0373707	-0.358973	0.163	0.336	1	Ddost
0.00750867	-0.356574	0.122	0.303	1	Cox5b
0.000126811	-0.355524	0.367	0.68	1	Fstl1
0.287556	-0.346357	0.347	0.475	1	Hspa5
0.0697671	-0.342098	0.49	0.68	1	Jun
0.0203161	-0.333949	0.122	0.303	1	Atp5d
6.35247e-08	-0.33231	0.265	0.705	0.00112547	Ogn
0.790746	-0.326029	0.306	0.352	1	Eln
0.239533	-0.32306	0.204	0.328	1	Tmem256
0.00774715	-0.320903	0.306	0.533	1	Cyb5a
0.183106	-0.31663	0.245	0.377	1	Gstt1
0.10097	-0.314912	0.163	0.311	1	Nedd4
0.0448309	-0.307953	0.184	0.336	1	Anxa1
0.0671882	-0.300883	0.143	0.279	1	Eif4a1
0.0242427	-0.297009	0.204	0.385	1	Tmed10
0.00787837	-0.295522	0.408	0.648	1	Rpl39
0.244369	-0.293651	0.245	0.361	1	Lum
9.12613e-06	-0.289099	0.245	0.574	0.161688	Fxyd1
0.139074	-0.287356	0.184	0.311	1	Hmgb1
0.00055903	-0.286405	0.122	0.328	1	Cpq
0.105741	-0.283239	0.714	0.844	1	Rps29
0.0814823	-0.277018	0.551	0.73	1	Actg1
0.0302697	-0.275854	0.122	0.27	1	Gpm6b
0.0184638	-0.275235	0.102	0.254	1	Tmem234
0.121469	-0.274878	0.204	0.336	1	Hnrnpk
2.22326e-05	-0.27147	0.265	0.574	0.393895	Lamp1
0.032763	-0.261524	0.122	0.262	1	Gm11361
0.000720631	-0.257097	0.531	0.803	1	Rpl41
0.0872884	-0.256961	0.143	0.262	1	Olfml2b
0.100412	-0.253915	0.143	0.262	1	Gm9843
0.00491307	-0.252238	0.245	0.492	1	Hsp90b1
0.294952	-0.250346	0.163	0.262	1	Rab14
0.402919	0.250325	0.469	0.41	1	Gadd45g
0.0107564	0.250848	0.653	0.656	1	Rpl4
0.000235128	0.260879	0.592	0.738	1	Rps15a
0.0522456	0.263058	0.265	0.295	1	Nedd8
0.00462247	0.266909	0.673	0.754	1	Rps24
0.057373	0.267881	0.306	0.361	1	Dad1
0.0828539	0.269322	0.388	0.41	1	Arpc2
0.109781	0.270053	0.306	0.32	1	Sdcbp
0.24701	0.271603	0.265	0.238	1	mt-Nd3
0.0269194	0.27337	0.776	0.779	1	Rpl37
0.239588	0.274856	0.469	0.402	1	Elob
0.00519698	0.275837	0.408	0.508	1	Hspa1a
0.0112271	0.276446	0.367	0.443	1	Atp5j
0.0237656	0.277056	0.286	0.32	1	Psma7
0.00666763	0.277302	0.327	0.385	1	Serf2
0.00228194	0.277846	0.286	0.352	1	Srsf3
0.000290215	0.280461	0.388	0.508	1	Calm1
0.0145486	0.285841	0.306	0.361	1	Clic1
0.00557982	0.289019	0.551	0.59	1	Rps25
0.00930391	0.289152	0.694	0.697	1	Rpl30
0.00866223	0.289722	0.735	0.77	1	Rps2
0.00122287	0.291879	0.633	0.705	1	Rplp0
0.104626	0.296342	0.306	0.32	1	Ndufa2
0.0421917	0.296691	0.265	0.295	1	Ndufv3
0.000214725	0.29935	0.408	0.557	1	Rpl17
0.408941	0.308536	0.286	0.246	1	Srsf11
0.00152049	0.311634	0.49	0.574	1	Cd81
0.131338	0.31338	0.265	0.287	1	Serinc3
0.0052336	0.317627	0.224	0.287	1	Sec61g
0.0608058	0.322634	0.551	0.541	1	Malat1
3.71974e-06	0.326223	0.367	0.516	0.0659027	Eef2
0.0181131	0.330885	0.327	0.336	1	Naca
0.0023068	0.336615	0.796	0.861	1	Rps3a1
0.0412402	0.33723	0.531	0.516	1	Son
0.0078177	0.340712	0.224	0.254	1	Ssr3
0.00776315	0.343004	0.571	0.598	1	Ppia
0.0990356	0.343535	0.327	0.295	1	Arpc3
0.0240797	0.344828	0.224	0.27	1	Gstp1
0.117899	0.3544	0.408	0.344	1	Atf4
0.225749	0.363589	0.306	0.254	1	Snx3
0.0360485	0.36375	0.347	0.344	1	Zyx
0.000256802	0.365731	0.469	0.541	1	Calm2
0.14653	0.37083	0.265	0.23	1	Atp5o
0.0128384	0.371632	0.571	0.623	1	mt-Cytb
0.00218849	0.372601	0.51	0.549	1	Rps13
0.172248	0.373401	0.306	0.262	1	Park7
2.87314e-06	0.381184	0.612	0.828	0.0509034	Tmsb4x
0.00995747	0.387893	0.714	0.68	1	Rpl21
0.000226356	0.389207	0.388	0.566	1	mt-Co1
0.00846897	0.390681	0.796	0.811	1	Hspa8
0.00171397	0.394194	0.327	0.352	1	Ndufa4
0.0476772	0.398022	0.306	0.295	1	Romo1
0.0232484	0.398429	0.469	0.443	1	Akr1a1
0.0128699	0.405261	0.347	0.361	1	Tuba1b
0.0584612	0.414538	0.347	0.328	1	Cnbp
0.0125082	0.415299	0.388	0.369	1	Gapdh
0.000529702	0.418061	0.347	0.393	1	Rps6
7.93856e-07	0.428707	0.531	0.672	0.0140648	Rpl19
0.0029693	0.430566	0.49	0.475	1	Cox6c
0.0247984	0.432086	0.265	0.27	1	Gm1821
0.0825232	0.432295	0.286	0.254	1	Ndufa5
0.000577321	0.437881	0.673	0.697	1	Actb
0.0678106	0.438799	0.469	0.402	1	H3f3b
0.0299886	0.440337	0.408	0.385	1	H2-K1
0.00753038	0.440393	0.857	0.803	1	Rps14
0.000954742	0.462806	0.327	0.361	1	Arhgdia
0.00918644	0.4674	0.469	0.467	1	Rpl10a
0.105112	0.468941	0.469	0.484	1	Arpc1b
0.0140354	0.470191	0.449	0.393	1	Csrp1
0.00319786	0.472618	0.245	0.27	1	Smdt1
0.000350852	0.472939	0.694	0.697	1	Rpl11
0.00133999	0.476687	0.449	0.443	1	Cox4i1
8.45418e-05	0.476972	0.449	0.516	1	mt-Rnr1
0.0594218	0.479635	0.265	0.23	1	D8Ertd738e
0.00014834	0.483783	0.796	0.77	1	Rps3
0.0775866	0.484645	0.327	0.27	1	Degs1
0.00115272	0.485203	0.306	0.377	1	Nupr1
0.0487497	0.486316	0.327	0.279	1	Hspe1
0.000807917	0.487517	0.204	0.27	1	Snrpg
0.00120752	0.487776	0.571	0.541	1	Oaz1
0.0172329	0.490603	0.327	0.311	1	Cox7a2
7.5477e-05	0.497948	0.694	0.713	1	Rpl7
0.225265	0.500329	0.265	0.205	1	Hnrnpc
0.00478322	0.500891	0.531	0.525	1	Selenow
0.122451	0.515433	0.286	0.205	1	Ndufb9
0.00104286	0.525605	0.755	0.672	1	Rps7
0.000214331	0.530141	0.551	0.566	1	Ddx5
0.00603977	0.530889	0.51	0.467	1	Klf9
0.00490688	0.531531	0.49	0.459	1	Tagln2
0.0172435	0.540795	0.265	0.23	1	Ndufa6
0.0055104	0.543285	0.816	0.721	1	Eif1
0.000388965	0.546289	0.694	0.598	1	Rpl36a
0.0143038	0.549043	0.265	0.238	1	Edf1
8.13412e-05	0.553798	0.531	0.525	1	mt-Nd5
0.0253145	0.564088	0.592	0.475	1	Nr4a1
0.000990643	0.56749	0.469	0.459	1	Tmem50a
0.229732	0.567683	0.265	0.172	1	Pkm
0.00540436	0.578834	0.449	0.385	1	Slc25a5
0.0371747	0.58274	0.286	0.246	1	Eif5
0.000120295	0.596566	0.735	0.631	1	Rps11
0.013387	0.601258	0.286	0.246	1	Id2
0.0744978	0.603131	0.265	0.221	1	Psmb6
0.0320652	0.606514	0.286	0.197	1	Uba52
0.0113296	0.606949	0.429	0.393	1	Nfkbia
0.0382337	0.610122	0.367	0.262	1	Ube2d3
0.0111914	0.614619	0.306	0.246	1	Ndufa11
3.64497e-05	0.617051	0.633	0.648	0.64578	Crip1
0.000394734	0.6231	0.755	0.648	1	Rpl35
0.00894455	0.626225	0.367	0.27	1	Npm1
0.0411266	0.627309	0.306	0.221	1	Eif4g2
0.00635632	0.637571	0.51	0.369	1	Pfn1
0.0072085	0.671366	0.429	0.311	1	Atp5b
0.0164964	0.672926	0.347	0.238	1	Ilk
0.000157839	0.690761	0.633	0.508	1	Cfl1
0.00184103	0.697924	0.265	0.205	1	Cnn3
0.0255643	0.70661	0.367	0.295	1	Atp5j2
0.0356392	0.717821	0.265	0.139	1	Anxa6
0.00816447	0.728819	0.286	0.246	1	Sh3bgrl3
0.000574716	0.740017	0.408	0.295	1	Atpif1
0.0107063	0.744808	0.306	0.205	1	Atp5g1
0.0273497	0.75011	0.265	0.139	1	Bax
0.00105308	0.754093	0.347	0.295	1	Sub1
0.00396173	0.754475	0.286	0.205	1	Hsbp1
2.75526e-05	0.76408	0.429	0.361	0.488149	Slc25a3
0.00176127	0.766876	0.347	0.287	1	Eif2s2
0.0191801	0.780142	0.306	0.139	1	Ppp1cb
0.0060989	0.800286	0.306	0.197	1	Pomp
4.5335e-06	0.828174	0.755	0.533	0.0803201	Ptma
6.79275e-07	0.872584	0.51	0.434	0.0120347	Gpx1
0.00293545	0.875035	0.286	0.148	1	Grem2
2.34552e-05	0.918622	0.49	0.377	0.415555	Cox8a
0.00100836	0.938145	0.327	0.172	1	Tns1
0.0019704	0.94931	0.367	0.18	1	Crip2
0.00615936	0.950652	0.327	0.131	1	Psma1
0.00743485	0.959112	0.306	0.139	1	Tsc22d1
0.00241169	0.996291	0.306	0.148	1	Ckb
0.0192759	1.00247	0.265	0.131	1	Kif5b
0.0027566	1.00902	0.286	0.123	1	Lgals3
0.00203584	1.01665	0.367	0.205	1	Cald1
0.000190614	1.03326	0.551	0.418	1	Btg2
0.00119442	1.10493	0.388	0.189	1	Flna
0.000123738	1.17158	0.306	0.123	1	Coq10b
0.00084046	1.20881	0.49	0.344	1	Adamts1
8.9232e-05	1.23943	0.347	0.082	1	Socs2
0.00906477	1.24591	0.265	0.107	1	Fcer1g
0.00187192	1.25468	0.265	0.09	1	Ppp1r12a
0.000246198	1.28978	0.286	0.156	1	Tyrobp
0.00049028	1.3948	0.286	0.131	1	Srgn
4.03036e-05	1.41945	0.327	0.172	0.714059	Aspn
8.34359e-08	1.47653	0.49	0.23	0.00147823	Tpm1
0.000206081	1.50849	0.306	0.123	1	Thbs1
2.06037e-07	1.59711	0.429	0.098	0.00365036	Serpine2
1.28031e-15	1.65462	0.735	0.5	2.26833e-11	Myl6
3.31675e-08	1.70253	0.449	0.139	0.000587628	Mylk
1.52435e-07	1.81623	0.531	0.123	0.00270068	Hspb1
1.79219e-07	1.84605	0.429	0.09	0.00317522	Igfbp5
1.20401e-10	2.20715	0.49	0.115	2.13314e-06	Tpm2
6.32339e-09	2.23384	0.449	0.09	0.000112032	Hhip
3.04274e-10	2.26345	0.469	0.049	5.39083e-06	Enpp2
1.20632e-11	2.35608	0.347	0	2.13724e-07	Tagln
2.60722e-13	2.40132	0.612	0.131	4.61921e-09	Myl9
1.20632e-11	2.42715	0.347	0	2.13724e-07	Actg2
1.20632e-11	2.47566	0.347	0	2.13724e-07	Des
1.21402e-18	2.71113	0.694	0.057	2.15087e-14	Mustn1
1.89563e-14	3.05239	0.571	0.057	3.35848e-10	Rgs2
7.32509e-19	3.68674	0.694	0.066	1.29779e-14	Acta2

[truncated: 2 more sheets: FindMarkers_LungB_C, FindMarkers_LungAB_C]
