# Supplementary material for: Adult mouse fibroblasts retain organ-specific transcriptomic identity
Source: eLife. 2022 Mar 16;11:e71008. doi: 10.7554/eLife.71008 (PMC8959603; doi:10.7554/eLife.71008)
Supplement: Figure 4—source data 2. [file elife-71008-fig4-data2.xlsx]

## Sheet: Kidney1 
p_val	avg_logFC	pct.1	pct.2	p_val_adj	cluster	gene
2.89631e-119	0.619135	0.922	0.07	4.72069e-115	Kidney1	Pax8
1.13551e-117	0.462746	0.8	0.042	1.85076e-113	Kidney1	Pax2
5.23724e-101	0.331066	0.8	0.055	8.53618e-97	Kidney1	Hnf1b
7.28382e-89	1.11443	0.944	0.145	1.18719e-84	Kidney1	Spns2
7.35852e-80	0.362773	0.6	0.038	1.19937e-75	Kidney1	Dclk3
3.74944e-78	0.605661	0.911	0.128	6.1112e-74	Kidney1	Cadm1
5.91595e-77	0.365752	0.678	0.054	9.64241e-73	Kidney1	Pkhd1
6.63682e-77	0.78861	0.789	0.101	1.08174e-72	Kidney1	Car2
1.24402e-74	0.742114	0.933	0.169	2.02763e-70	Kidney1	Pcbd1
2.20164e-73	0.519309	0.811	0.099	3.58845e-69	Kidney1	Lad1
6.92239e-73	0.626752	0.889	0.158	1.12828e-68	Kidney1	Ptpn13
3.74541e-70	0.494763	0.811	0.125	6.10465e-66	Kidney1	St8sia2
5.92987e-70	0.699001	0.867	0.141	9.6651e-66	Kidney1	Col4a4
1.22073e-68	0.408821	0.667	0.072	1.98967e-64	Kidney1	Spns3
2.16995e-64	0.252648	0.633	0.061	3.5368e-60	Kidney1	Igsf5
7.76738e-64	0.256272	0.567	0.048	1.266e-59	Kidney1	Cds1
2.40005e-62	1.31226	0.6	0.063	3.91184e-58	Kidney1	Havcr1
4.83513e-62	0.367863	0.7	0.1	7.88078e-58	Kidney1	Rasl12
4.25997e-61	0.320389	0.589	0.059	6.94333e-57	Kidney1	Clstn2
4.73383e-61	0.401544	0.722	0.089	7.71567e-57	Kidney1	Pdgfb
7.8466e-60	0.573934	0.778	0.123	1.27892e-55	Kidney1	Col4a3
4.61379e-59	0.319366	0.5	0.037	7.52001e-55	Kidney1	1700011H14Rik
2.29394e-58	0.291915	0.656	0.074	3.73889e-54	Kidney1	Gprc5c
2.12221e-56	1.17591	0.933	0.335	3.45899e-52	Kidney1	Peg3
6.68072e-54	0.965941	0.956	0.337	1.08889e-49	Kidney1	Itga3
6.84081e-54	0.403126	0.622	0.08	1.11498e-49	Kidney1	Clmn
1.56921e-53	0.43472	0.667	0.087	2.55766e-49	Kidney1	Cdh16
1.8168e-53	1.85684	1	0.987	2.96121e-49	Kidney1	Tsc22d1
2.2632e-51	0.654454	0.911	0.303	3.68879e-47	Kidney1	Sytl2
1.74097e-50	0.416561	0.8	0.189	2.83761e-46	Kidney1	Adgrg6
3.33441e-50	1.10577	0.978	0.509	5.43476e-46	Kidney1	Plscr2
8.30532e-49	0.409123	0.611	0.096	1.35368e-44	Kidney1	Kcnk12
1.18104e-47	0.493083	0.778	0.192	1.92498e-43	Kidney1	Shroom4
3.28516e-47	1.13826	1	0.84	5.35449e-43	Kidney1	Bicc1
2.98924e-46	1.31939	1	0.841	4.87217e-42	Kidney1	Cystm1
3.40586e-46	0.795569	0.8	0.213	5.55121e-42	Kidney1	Akr1c19
8.51498e-45	0.980082	0.889	0.354	1.38786e-40	Kidney1	Dkk3
1.50563e-44	-1.80776	0.989	0.996	2.45402e-40	Kidney1	Bgn
4.57561e-44	0.337706	0.822	0.208	7.45778e-40	Kidney1	Cxadr
5.96303e-44	0.664953	0.789	0.211	9.71914e-40	Kidney1	Tmem171
8.28655e-44	0.369789	0.867	0.294	1.35062e-39	Kidney1	Met
1.03949e-43	0.649387	0.933	0.423	1.69427e-39	Kidney1	Wwc1
1.83977e-43	0.732716	1	0.804	2.99864e-39	Kidney1	Rbpms
5.04751e-43	0.57307	0.756	0.205	8.22694e-39	Kidney1	Srd5a1
1.45527e-42	1.22028	0.978	0.739	2.37195e-38	Kidney1	Cotl1
2.41846e-42	1.07158	0.911	0.403	3.94184e-38	Kidney1	Sox11
3.12234e-42	0.538289	0.578	0.1	5.0891e-38	Kidney1	Proser2
4.73025e-42	-1.85815	0.956	0.983	7.70983e-38	Kidney1	Col1a2
1.73841e-41	0.363828	0.778	0.211	2.83343e-37	Kidney1	Shroom3
1.90034e-41	0.496244	0.833	0.264	3.09737e-37	Kidney1	Agrn
3.28429e-41	0.532957	0.933	0.363	5.35306e-37	Kidney1	Hoxa10
6.53228e-41	-1.82681	0.933	0.99	1.0647e-36	Kidney1	Col1a1
8.39063e-41	0.592086	0.933	0.324	1.36759e-36	Kidney1	Col18a1
8.94893e-41	0.255225	0.611	0.109	1.45859e-36	Kidney1	Epb41l5
1.08582e-40	-1.08424	0.822	0.979	1.76978e-36	Kidney1	Ifitm3
1.26052e-40	0.745767	0.989	0.839	2.05452e-36	Kidney1	Steap2
2.15402e-40	1.13709	0.978	0.75	3.51084e-36	Kidney1	Jag1
5.15679e-39	-0.966382	0.689	0.945	8.40505e-35	Kidney1	Pcolce
1.24011e-38	0.834504	0.956	0.499	2.02126e-34	Kidney1	Hoxb9
1.92963e-38	1.2035	0.889	0.389	3.1451e-34	Kidney1	Gdf15
5.08683e-38	0.450431	0.9	0.467	8.29103e-34	Kidney1	Dtnb
1.10848e-37	0.333086	0.544	0.097	1.80671e-33	Kidney1	Lpcat2
1.11706e-37	0.291876	0.678	0.14	1.8207e-33	Kidney1	Adgrg1
1.24889e-37	0.328441	0.789	0.251	2.03556e-33	Kidney1	Atp6v0e2
2.62181e-37	-1.13341	0.878	0.968	4.27328e-33	Kidney1	Emp1
2.80683e-37	-0.724248	0.211	0.868	4.57485e-33	Kidney1	Prrx1
6.8663e-37	0.573868	0.833	0.332	1.11914e-32	Kidney1	Abcc4
7.14287e-37	1.782	0.989	0.924	1.16422e-32	Kidney1	Gpx3
9.00985e-37	0.34228	0.744	0.23	1.46852e-32	Kidney1	Rbm38
2.38682e-36	0.29837	0.433	0.052	3.89028e-32	Kidney1	Pdzk1ip1
2.96275e-36	0.705516	0.956	0.671	4.82898e-32	Kidney1	Msi2
4.86228e-36	0.57441	0.844	0.317	7.92503e-32	Kidney1	Aldh1a2
1.3189e-35	-1.0732	0.478	0.895	2.14968e-31	Kidney1	Ptgis
2.26536e-35	0.969664	1	0.873	3.69231e-31	Kidney1	Cd24a
7.03499e-35	-0.494305	1	1	1.14663e-30	Kidney1	Rpl18a
1.08601e-34	0.51189	0.933	0.562	1.77009e-30	Kidney1	Ptprk
1.15442e-34	1.57792	1	0.917	1.88159e-30	Kidney1	Ly6e
1.99111e-34	-1.03698	0.933	0.991	3.24531e-30	Kidney1	Anxa1
2.27726e-34	0.299241	0.5	0.089	3.71171e-30	Kidney1	Tspan18
4.03229e-34	0.793412	0.967	0.824	6.57223e-30	Kidney1	Smtn
4.62482e-34	1.17082	0.956	0.823	7.538e-30	Kidney1	Tinagl1
4.95017e-34	0.275953	0.822	0.274	8.06828e-30	Kidney1	Spint2
8.93871e-34	0.878393	0.989	0.937	1.45692e-29	Kidney1	Plin2
1.47929e-33	-1.06825	0.589	0.928	2.41109e-29	Kidney1	Col3a1
2.37837e-33	-1.5499	1	0.997	3.8765e-29	Kidney1	Timp1
2.38947e-33	0.865749	0.989	0.915	3.89459e-29	Kidney1	Ivns1abp
3.3614e-33	0.582146	0.956	0.646	5.47875e-29	Kidney1	Cxxc5
7.28673e-33	0.251187	0.456	0.068	1.18766e-28	Kidney1	Cldn1
2.65352e-32	0.415025	0.833	0.378	4.32498e-28	Kidney1	Glis3
6.15761e-32	0.257091	0.656	0.173	1.00363e-27	Kidney1	Ank3
1.2179e-31	-0.495842	1	1	1.98506e-27	Kidney1	Rps24
1.25277e-31	0.897826	0.989	0.871	2.04189e-27	Kidney1	Ncam1
1.38601e-31	-0.837013	0.833	0.95	2.25907e-27	Kidney1	Fbn1
1.89595e-31	0.511913	0.811	0.294	3.09021e-27	Kidney1	Ccbe1
2.76314e-31	0.795992	0.989	0.616	4.50364e-27	Kidney1	Tmem176b
3.85339e-31	-0.472904	1	1	6.28065e-27	Kidney1	Rps19
1.26979e-30	0.47876	0.778	0.264	2.06963e-26	Kidney1	Scx
1.39132e-30	-0.556433	1	1	2.26772e-26	Kidney1	Rpsa
2.29408e-30	0.827819	0.867	0.468	3.73912e-26	Kidney1	Plat
2.89752e-30	0.359113	0.878	0.46	4.72267e-26	Kidney1	Mtmr11
9.15782e-30	0.810621	0.978	0.679	1.49263e-25	Kidney1	Gxylt2
9.16588e-30	0.605933	0.989	0.854	1.49395e-25	Kidney1	Cdk6
1.07076e-29	-0.458359	1	1	1.74523e-25	Kidney1	Rps15a
1.09187e-29	-1.56437	0.811	0.955	1.77964e-25	Kidney1	Crip1
3.09083e-29	0.877951	0.967	0.746	5.03774e-25	Kidney1	Adamts5
3.31522e-29	0.413573	0.811	0.37	5.40348e-25	Kidney1	Myo18a
3.66867e-29	0.560238	0.9	0.527	5.97957e-25	Kidney1	Camk2n1
3.90537e-29	-0.854077	0.922	0.984	6.36536e-25	Kidney1	Col5a2
6.16209e-29	0.647727	0.856	0.398	1.00436e-24	Kidney1	Sorbs2
6.2971e-29	0.744201	0.922	0.623	1.02636e-24	Kidney1	Spry1
6.68504e-29	0.593017	0.922	0.48	1.08959e-24	Kidney1	Tmem176a
8.20263e-29	-0.811072	1	0.999	1.33695e-24	Kidney1	Timp2
9.48018e-29	-0.384796	1	1	1.54517e-24	Kidney1	Rpl34
1.1825e-28	0.637294	0.978	0.781	1.92735e-24	Kidney1	Enah
1.39803e-28	0.564168	0.878	0.463	2.27865e-24	Kidney1	Rdh10
1.58721e-28	0.780012	0.822	0.425	2.587e-24	Kidney1	Aif1l
1.70736e-28	-0.426289	0.5	0.909	2.78282e-24	Kidney1	Smco4
2.93727e-28	-0.499797	0.756	0.962	4.78746e-24	Kidney1	Nfix
2.94336e-28	0.670296	0.978	0.984	4.79737e-24	Kidney1	Litaf
3.79701e-28	-0.823984	0.333	0.822	6.18874e-24	Kidney1	Mfap5
6.49572e-28	0.638883	0.889	0.567	1.05874e-23	Kidney1	Gprc5a
7.32984e-28	-0.562026	0.678	0.941	1.19469e-23	Kidney1	2310022B05Rik
1.17102e-27	0.445511	1	0.997	1.90864e-23	Kidney1	Msn
1.21003e-27	0.520412	0.967	0.699	1.97223e-23	Kidney1	Oxr1
1.81563e-27	0.412428	0.9	0.536	2.95929e-23	Kidney1	Lrrc8d
1.89385e-27	-0.412679	0.222	0.811	3.08679e-23	Kidney1	Ddr2
2.15239e-27	0.448678	0.733	0.286	3.50819e-23	Kidney1	Arhgef28
2.44938e-27	0.565529	0.989	0.982	3.99225e-23	Kidney1	Cd151
2.61448e-27	-0.607866	0.378	0.831	4.26133e-23	Kidney1	Arhgdib
2.88945e-27	0.644364	1	0.997	4.70951e-23	Kidney1	Itgb1
4.06029e-27	-0.398686	1	0.999	6.61787e-23	Kidney1	Rpl22
4.10552e-27	-0.395264	1	1	6.69158e-23	Kidney1	Rpl13
4.52666e-27	0.284434	0.756	0.29	7.37801e-23	Kidney1	Fam134b
4.67548e-27	0.405408	0.978	0.776	7.62057e-23	Kidney1	Runx1
5.29527e-27	-0.542511	1	1	8.63076e-23	Kidney1	Arpc1b
5.616e-27	1.62603	0.989	0.935	9.15351e-23	Kidney1	Spp1
1.21604e-26	-0.565146	0.978	0.986	1.98203e-22	Kidney1	Ckap4
1.37739e-26	-0.659576	0.389	0.856	2.24501e-22	Kidney1	Jam2
1.52454e-26	0.61358	0.922	0.637	2.48486e-22	Kidney1	Egfr
1.62028e-26	-0.338681	1	1	2.64089e-22	Kidney1	Rps15
2.76627e-26	0.372847	0.856	0.399	4.50874e-22	Kidney1	Hoxb8
2.81353e-26	0.532197	0.967	0.721	4.58577e-22	Kidney1	Arl4c
3.29381e-26	-0.345048	1	1	5.36859e-22	Kidney1	Rps14
3.72414e-26	0.516201	1	0.93	6.06998e-22	Kidney1	Chd3
4.24737e-26	0.396793	0.911	0.621	6.92279e-22	Kidney1	Sh3d19
6.21418e-26	-0.404596	1	1	1.01285e-21	Kidney1	Rps28
6.5378e-26	-0.369222	0.122	0.728	1.0656e-21	Kidney1	Snai1
8.04011e-26	-0.396899	1	1	1.31046e-21	Kidney1	Rps23
8.31899e-26	-0.869526	0.967	0.99	1.35591e-21	Kidney1	Csf1
9.88476e-26	-1.1121	0.944	0.988	1.61112e-21	Kidney1	Lox
1.16818e-25	0.262005	0.622	0.183	1.90402e-21	Kidney1	Vldlr
1.89404e-25	-2.03966	1	0.996	3.0871e-21	Kidney1	S100a4
1.9629e-25	-0.411964	1	1	3.19934e-21	Kidney1	Rps3a1
2.55333e-25	0.864832	0.911	0.709	4.16166e-21	Kidney1	Clcf1
2.62955e-25	-0.371935	1	1	4.2859e-21	Kidney1	Rplp2
3.14156e-25	-0.48492	1	1	5.12043e-21	Kidney1	Rplp1
3.77097e-25	-0.651038	0.889	0.973	6.14631e-21	Kidney1	Prkcdbp
4.49615e-25	-0.403452	1	1	7.32828e-21	Kidney1	Rps5
4.58199e-25	0.316353	0.689	0.271	7.46819e-21	Kidney1	Kctd1
6.15004e-25	0.779034	1	0.898	1.00239e-20	Kidney1	2200002D01Rik
8.26946e-25	-0.456516	0.478	0.89	1.34784e-20	Kidney1	Ltbp1
9.2151e-25	0.424537	0.989	0.918	1.50197e-20	Kidney1	Rab22a
9.49366e-25	0.506096	0.9	0.596	1.54737e-20	Kidney1	Bhlhe40
9.53706e-25	-0.637936	0.256	0.761	1.55445e-20	Kidney1	Tmem45a
1.26327e-24	0.558564	1	0.98	2.05901e-20	Kidney1	Jund
1.59724e-24	-0.44398	0.378	0.858	2.60334e-20	Kidney1	Sulf1
2.04141e-24	0.42896	0.944	0.743	3.3273e-20	Kidney1	Phip
2.19736e-24	-0.40574	1	1	3.58147e-20	Kidney1	Rps27a
2.38069e-24	0.540711	0.878	0.556	3.88028e-20	Kidney1	Ldhb
2.63878e-24	-0.59723	0.478	0.873	4.30095e-20	Kidney1	Fbln5
3.59637e-24	-0.505679	0.533	0.91	5.86172e-20	Kidney1	Rnase4
3.94166e-24	0.353549	0.767	0.314	6.42451e-20	Kidney1	Hoxa9
4.96197e-24	0.414562	0.944	0.687	8.08752e-20	Kidney1	Ptpn14
5.69385e-24	-0.510896	0.456	0.84	9.28041e-20	Kidney1	Fkbp11
7.20607e-24	-0.435969	1	1	1.17452e-19	Kidney1	Rps20
7.38236e-24	-0.397543	1	0.999	1.20325e-19	Kidney1	Rpl35a
7.42315e-24	-0.545439	0.567	0.902	1.2099e-19	Kidney1	Ctsh
7.49031e-24	0.66181	0.933	0.684	1.22084e-19	Kidney1	Klhdc8a
8.28578e-24	0.809897	0.944	0.608	1.3505e-19	Kidney1	Nrep
8.41382e-24	0.29041	0.822	0.462	1.37137e-19	Kidney1	Agap1
8.8952e-24	-0.397024	0.233	0.778	1.44983e-19	Kidney1	Mmp23
1.03298e-23	-0.882554	0.667	0.904	1.68365e-19	Kidney1	Pdlim2
1.15715e-23	0.472704	0.5	0.121	1.88604e-19	Kidney1	Bex1
1.29844e-23	-0.340529	1	1	2.11633e-19	Kidney1	Rpl13a
1.81486e-23	0.436589	0.856	0.468	2.95804e-19	Kidney1	Parm1
2.07513e-23	0.381751	0.978	0.95	3.38225e-19	Kidney1	Stx7
2.27111e-23	0.389853	0.822	0.552	3.70169e-19	Kidney1	D1Ertd622e
2.45432e-23	-0.493108	1	1	4.0003e-19	Kidney1	Rps12
2.71997e-23	0.563003	0.967	0.813	4.43327e-19	Kidney1	Ctxn1
3.04228e-23	-0.335263	1	1	4.95861e-19	Kidney1	Rpl26
6.15401e-23	-0.448531	0.2	0.754	1.00304e-18	Kidney1	Emilin1
6.77381e-23	-0.328145	1	1	1.10406e-18	Kidney1	Rpl37
8.32121e-23	-1.47045	0.611	0.869	1.35627e-18	Kidney1	Meg3
8.42238e-23	0.317791	0.711	0.308	1.37276e-18	Kidney1	Nrg1
8.67682e-23	-0.295142	0.144	0.716	1.41424e-18	Kidney1	Mrc2
9.09957e-23	-0.348267	1	1	1.48314e-18	Kidney1	Rpl11
9.66303e-23	-0.583763	0.711	0.946	1.57498e-18	Kidney1	Rcn3
1.15995e-22	0.398712	0.989	0.907	1.8906e-18	Kidney1	Bin1
1.18894e-22	-0.349493	1	1	1.93785e-18	Kidney1	Rpl30
1.31494e-22	-0.346812	1	1	2.14321e-18	Kidney1	Rps18
1.51889e-22	-0.348803	1	1	2.47564e-18	Kidney1	Rpl37a
1.60553e-22	-0.677327	0.756	0.934	2.61685e-18	Kidney1	Ngf
1.69747e-22	0.325891	0.878	0.578	2.7667e-18	Kidney1	Fnbp1l
1.88806e-22	-0.382564	1	1	3.07735e-18	Kidney1	Rps8
2.35858e-22	0.483048	0.956	0.864	3.84425e-18	Kidney1	Acly
2.85142e-22	-0.943655	0.711	0.914	4.64752e-18	Kidney1	Cthrc1
4.15997e-22	0.511494	1	0.93	6.78033e-18	Kidney1	Nrp1
4.5507e-22	0.318773	0.822	0.456	7.41719e-18	Kidney1	Slc9a3r1
5.03972e-22	0.44968	1	0.945	8.21425e-18	Kidney1	Aplp2
6.2965e-22	-0.374846	0.522	0.886	1.02627e-17	Kidney1	Gpx7
6.99266e-22	-0.49289	0.733	0.943	1.13973e-17	Kidney1	Fkbp10
8.50203e-22	0.317902	0.844	0.466	1.38575e-17	Kidney1	Ezr
8.8856e-22	-0.491272	0.5	0.869	1.44826e-17	Kidney1	Rhoj
9.10831e-22	-0.371248	1	1	1.48456e-17	Kidney1	Rps7
1.11101e-21	0.536252	1	0.984	1.81083e-17	Kidney1	Prdx6
1.32885e-21	0.36456	0.867	0.535	2.16589e-17	Kidney1	Dusp14
1.36502e-21	-0.463826	0.911	0.98	2.22485e-17	Kidney1	Itpripl2
1.41159e-21	-0.324413	1	0.999	2.30074e-17	Kidney1	Rps25
1.43488e-21	0.622517	1	1	2.33871e-17	Kidney1	Tpm1
1.51202e-21	-0.318695	1	1	2.46444e-17	Kidney1	Rpl21
1.61951e-21	-0.329375	1	1	2.63965e-17	Kidney1	Rps16
1.98114e-21	0.817066	0.933	0.817	3.22906e-17	Kidney1	Cyp1b1
2.59439e-21	-0.369017	1	1	4.2286e-17	Kidney1	Rpl35
2.61312e-21	-0.484366	0.544	0.861	4.25912e-17	Kidney1	Pmp22
2.69764e-21	-0.493079	1	1	4.39688e-17	Kidney1	Serpinh1
3.13556e-21	0.29453	0.922	0.595	5.11065e-17	Kidney1	Rab11fip5
4.31702e-21	-0.603122	0.844	0.956	7.03632e-17	Kidney1	Fam198b
5.03379e-21	-0.357454	1	1	8.20458e-17	Kidney1	Rps10
5.85635e-21	0.339182	0.922	0.706	9.54526e-17	Kidney1	Creld1
5.98763e-21	0.354306	0.589	0.213	9.75924e-17	Kidney1	Map3k7cl
6.95124e-21	0.353574	0.944	0.674	1.13298e-16	Kidney1	Hmgb3
6.9711e-21	-0.358699	1	1	1.13622e-16	Kidney1	Gnb2l1
7.58952e-21	0.460512	0.911	0.618	1.23702e-16	Kidney1	Zfp503
7.69827e-21	-0.739554	0.533	0.866	1.25474e-16	Kidney1	Sdpr
9.93759e-21	-0.657919	0.367	0.772	1.61973e-16	Kidney1	Eng
1.10332e-20	-0.542025	0.211	0.724	1.7983e-16	Kidney1	Thbs2
1.24732e-20	-0.356853	0.411	0.818	2.03301e-16	Kidney1	Arhgap31
1.29866e-20	0.426842	1	0.999	2.11669e-16	Kidney1	Atp6v0e
1.39767e-20	-0.348463	1	0.998	2.27807e-16	Kidney1	Rps6
1.54303e-20	-0.32187	1	1	2.51498e-16	Kidney1	Rpl32
2.14777e-20	-0.343107	0.133	0.656	3.50066e-16	Kidney1	Ereg
2.18101e-20	0.412851	0.944	0.866	3.55483e-16	Kidney1	Cfap36
2.28964e-20	-0.360969	1	0.999	3.73188e-16	Kidney1	Rpl31
2.36651e-20	2.07689	0.767	0.435	3.85718e-16	Kidney1	Il11
2.56675e-20	-0.393534	1	1	4.18355e-16	Kidney1	Rps4x
2.59398e-20	0.318163	0.8	0.424	4.22792e-16	Kidney1	Osbpl3
2.76966e-20	-0.342244	1	1	4.51427e-16	Kidney1	Rps27
2.88045e-20	0.620844	0.844	0.565	4.69484e-16	Kidney1	Adamts1
3.02102e-20	-0.445157	0.822	0.978	4.92397e-16	Kidney1	Apbb2
4.08621e-20	-0.293811	1	1	6.66011e-16	Kidney1	Rpl23
4.08621e-20	-0.310998	1	1	6.66011e-16	Kidney1	Rpl23a
4.27068e-20	-0.37913	1	1	6.96078e-16	Kidney1	Eef1b2
5.14499e-20	-0.489238	0.878	0.954	8.38582e-16	Kidney1	Ctsz
5.20549e-20	-0.506968	0.5	0.872	8.48443e-16	Kidney1	Klf2
5.26488e-20	-0.767744	0.422	0.823	8.58123e-16	Kidney1	Serpinf1
5.35993e-20	0.545258	0.844	0.496	8.73614e-16	Kidney1	Pmaip1
5.66179e-20	-0.358474	0.189	0.696	9.22815e-16	Kidney1	Cd248
6.05611e-20	-0.331353	1	1	9.87086e-16	Kidney1	Rpl8
6.5092e-20	0.342436	0.989	0.989	1.06094e-15	Kidney1	Ap2m1
6.96715e-20	-0.256789	0.189	0.71	1.13558e-15	Kidney1	Apbb1ip
8.53546e-20	0.350236	0.778	0.441	1.39119e-15	Kidney1	Fam84b
9.32692e-20	0.464444	0.989	0.977	1.5202e-15	Kidney1	Atp6v1e1
9.59735e-20	-0.323804	1	1	1.56427e-15	Kidney1	Rpl4
1.05274e-19	-0.394342	0.844	0.952	1.71586e-15	Kidney1	Adam9
1.09588e-19	-0.308188	1	1	1.78617e-15	Kidney1	Rpl14
1.1214e-19	0.293998	0.789	0.457	1.82776e-15	Kidney1	Cib2
1.55729e-19	-0.276647	0.089	0.623	2.53823e-15	Kidney1	Gata6
1.68089e-19	-0.306526	1	1	2.73969e-15	Kidney1	Rps11
2.5926e-19	-0.314717	1	1	4.22567e-15	Kidney1	Rps17
2.66563e-19	-0.334055	1	1	4.34471e-15	Kidney1	Rpl29
2.92687e-19	0.259188	0.856	0.602	4.77051e-15	Kidney1	Dnal4
2.95249e-19	0.370364	0.967	0.922	4.81226e-15	Kidney1	Gde1
3.24338e-19	-0.638661	0.267	0.717	5.28638e-15	Kidney1	Igfbp6
3.6882e-19	0.252647	0.722	0.355	6.0114e-15	Kidney1	Plekhh2
3.73596e-19	-0.370107	0.889	0.976	6.08925e-15	Kidney1	Gm10073
4.39791e-19	0.344464	0.978	0.924	7.16816e-15	Kidney1	Uap1
5.35524e-19	0.4693	1	0.994	8.7285e-15	Kidney1	Hn1
6.00829e-19	0.340427	0.8	0.434	9.79291e-15	Kidney1	Hoxb7
6.36402e-19	0.439529	0.856	0.62	1.03727e-14	Kidney1	Nav2
7.36768e-19	0.385024	0.978	0.904	1.20086e-14	Kidney1	Ubl3
7.78419e-19	-0.645764	0.944	0.995	1.26875e-14	Kidney1	Fbln2
9.54456e-19	-0.644285	0.967	0.997	1.55567e-14	Kidney1	Gsto1
9.82247e-19	-0.325616	0.722	0.951	1.60096e-14	Kidney1	Epb41l2
1.01735e-18	0.532975	0.967	0.945	1.65818e-14	Kidney1	Crim1
1.43409e-18	0.292153	0.678	0.365	2.33743e-14	Kidney1	Gcnt2
1.46603e-18	0.286967	0.978	0.957	2.38949e-14	Kidney1	Scoc
1.79213e-18	-0.491449	0.933	0.954	2.921e-14	Kidney1	Loxl1
1.92237e-18	0.397277	0.667	0.315	3.13326e-14	Kidney1	Tgm2
1.92856e-18	0.5023	1	0.987	3.14336e-14	Kidney1	Mfge8
2.01778e-18	0.402313	0.989	0.994	3.28877e-14	Kidney1	Nop10
2.02081e-18	-0.397785	0.967	0.995	3.29371e-14	Kidney1	Myo1c
2.09056e-18	-0.425178	0.411	0.777	3.40741e-14	Kidney1	Loxl3
2.4644e-18	-0.815021	0.733	0.919	4.01672e-14	Kidney1	Vamp5
2.59736e-18	-0.293049	1	1	4.23344e-14	Kidney1	Rps3
2.81143e-18	0.461194	0.956	0.818	4.58236e-14	Kidney1	Cdh11
2.87471e-18	0.427627	0.967	0.904	4.68549e-14	Kidney1	Zak
2.98356e-18	-0.298625	0.244	0.728	4.8629e-14	Kidney1	Slit2
3.04934e-18	-0.457935	0.444	0.813	4.97012e-14	Kidney1	Fgf2
5.44025e-18	0.257722	0.8	0.465	8.86707e-14	Kidney1	Smad3
5.57475e-18	-0.295533	0.244	0.753	9.08629e-14	Kidney1	3300005D01Rik
6.89453e-18	-0.823157	0.422	0.778	1.12374e-13	Kidney1	Postn
7.50562e-18	-0.318735	1	1	1.22334e-13	Kidney1	Rpl5
7.63278e-18	0.55562	0.867	0.7	1.24407e-13	Kidney1	Hist3h2a
8.98765e-18	-0.470358	0.922	0.988	1.4649e-13	Kidney1	Pdlim1
9.16739e-18	0.388595	0.867	0.639	1.49419e-13	Kidney1	D030056L22Rik
9.43806e-18	-0.318344	1	1	1.53831e-13	Kidney1	Rps13
1.02796e-17	0.384967	0.833	0.604	1.67547e-13	Kidney1	Fgd3
1.05166e-17	-0.464752	0.889	0.966	1.7141e-13	Kidney1	Snhg18
1.10632e-17	0.340856	0.989	0.952	1.8032e-13	Kidney1	Stard3nl
1.14803e-17	-0.380292	0.867	0.964	1.87117e-13	Kidney1	Ehd2
1.32621e-17	-0.398277	1	0.996	2.16159e-13	Kidney1	Rrbp1
1.39729e-17	0.295818	0.722	0.42	2.27745e-13	Kidney1	Arhgap42
1.4456e-17	0.527641	0.911	0.661	2.35618e-13	Kidney1	Slco2a1
1.45592e-17	-0.28759	0.422	0.85	2.373e-13	Kidney1	Emp2
1.67056e-17	-0.368599	0.344	0.795	2.72284e-13	Kidney1	Pdgfrb
2.05219e-17	-0.305327	1	1	3.34487e-13	Kidney1	Rpl6
2.22166e-17	0.301019	0.911	0.777	3.62109e-13	Kidney1	Zfp664
2.28687e-17	-0.261597	0.233	0.712	3.72737e-13	Kidney1	Twist1
2.5325e-17	0.310199	0.456	0.145	4.12773e-13	Kidney1	Rprm
2.64496e-17	0.453641	1	1	4.31103e-13	Kidney1	mt-Nd4
3.20652e-17	0.368592	0.811	0.544	5.2263e-13	Kidney1	Pdgfc
3.62838e-17	-0.306385	0.467	0.811	5.91389e-13	Kidney1	Gpr176
3.90322e-17	0.368747	1	0.998	6.36187e-13	Kidney1	Atpif1
3.99471e-17	-0.397623	1	1	6.51098e-13	Kidney1	Lgals1
4.2635e-17	0.336575	1	0.996	6.94908e-13	Kidney1	BC031181
4.71068e-17	-0.308363	1	1	7.67794e-13	Kidney1	Sh3glb1
5.07613e-17	-0.503181	0.2	0.655	8.27359e-13	Kidney1	Srpx2
5.45769e-17	0.417278	1	0.996	8.89548e-13	Kidney1	1810037I17Rik
5.60922e-17	-0.28396	1	0.998	9.14247e-13	Kidney1	Wdr89
5.69569e-17	-0.617494	0.933	0.979	9.28341e-13	Kidney1	Emp3
6.13312e-17	0.69933	1	0.996	9.99638e-13	Kidney1	Ngfrap1
6.4129e-17	-0.286791	1	1	1.04524e-12	Kidney1	Rpl39
6.51604e-17	0.4236	0.789	0.484	1.06205e-12	Kidney1	Fam213a
6.91933e-17	0.646194	0.833	0.726	1.12778e-12	Kidney1	Nes
8.68831e-17	0.405738	0.9	0.732	1.41611e-12	Kidney1	Epha2
9.0108e-17	0.634969	1	0.999	1.46867e-12	Kidney1	Fn1
1.06377e-16	0.262315	0.722	0.403	1.73384e-12	Kidney1	Myo6
1.15102e-16	-0.687433	0.622	0.869	1.87605e-12	Kidney1	Col8a1
1.34166e-16	0.343878	0.956	0.918	2.18677e-12	Kidney1	Ifngr2
1.38078e-16	-0.346163	1	1	2.25053e-12	Kidney1	Eef1g
1.52091e-16	-0.481475	0.933	0.993	2.47893e-12	Kidney1	Ifitm2
1.54869e-16	0.326581	0.656	0.291	2.52422e-12	Kidney1	Hist1h4h
1.8935e-16	0.307213	0.822	0.639	3.08622e-12	Kidney1	Ppp2r5b
1.90888e-16	-0.433125	0.356	0.75	3.11129e-12	Kidney1	Tnfrsf11b
2.26441e-16	0.361906	0.756	0.427	3.69076e-12	Kidney1	Amot
2.404e-16	0.334969	0.989	0.965	3.91828e-12	Kidney1	B230219D22Rik
3.4637e-16	-0.451594	0.744	0.928	5.64549e-12	Kidney1	Gng11
3.7066e-16	0.305677	0.967	0.889	6.04139e-12	Kidney1	Tpd52
3.77011e-16	0.382264	0.967	0.93	6.1449e-12	Kidney1	Csnk1e
4.08009e-16	-0.32688	0.833	0.947	6.65013e-12	Kidney1	Yif1b
4.24851e-16	0.262116	0.656	0.316	6.92465e-12	Kidney1	Tuft1
4.50233e-16	-0.274974	0.578	0.87	7.33835e-12	Kidney1	Man2a1
4.59562e-16	-0.273651	0.322	0.738	7.4904e-12	Kidney1	Gstm2
4.944e-16	0.263369	0.833	0.681	8.05823e-12	Kidney1	Hacd3
6.83039e-16	-0.268482	0.133	0.607	1.11329e-11	Kidney1	Lpar1
7.29948e-16	-0.287854	1	1	1.18974e-11	Kidney1	Rpl9
7.40892e-16	0.334334	0.944	0.949	1.20758e-11	Kidney1	Atp6v1d
7.49591e-16	0.284958	0.889	0.698	1.22176e-11	Kidney1	Plekhb2
8.41103e-16	0.334398	0.989	0.908	1.37091e-11	Kidney1	Tes
1.05963e-15	-0.652773	0.989	0.987	1.72709e-11	Kidney1	Tpm2
1.06119e-15	-0.297124	0.7	0.91	1.72963e-11	Kidney1	Map6
1.08258e-15	-0.423814	0.578	0.858	1.76449e-11	Kidney1	Ahnak2
1.08799e-15	-0.301303	0.733	0.916	1.77331e-11	Kidney1	Ehbp1l1
1.12512e-15	-0.372465	0.856	0.968	1.83383e-11	Kidney1	Asap1
1.13077e-15	-0.351306	1	1	1.84304e-11	Kidney1	Rpl12
1.30037e-15	-0.251422	0	0.455	2.11947e-11	Kidney1	Il6
1.35821e-15	-0.277257	0.233	0.691	2.21374e-11	Kidney1	Clmp
1.44237e-15	0.376177	0.6	0.265	2.35092e-11	Kidney1	Cp
1.55613e-15	0.299939	0.844	0.644	2.53633e-11	Kidney1	Hrsp12
1.75393e-15	-0.338302	0.967	0.998	2.85873e-11	Kidney1	Serpinb6a
1.80576e-15	-0.274329	0.344	0.765	2.94321e-11	Kidney1	Cd109
1.90312e-15	0.304813	0.922	0.798	3.1019e-11	Kidney1	Cd2ap
2.22875e-15	-0.295415	1	1	3.63264e-11	Kidney1	Rps29
2.32613e-15	0.275603	0.822	0.536	3.79137e-11	Kidney1	Emx2
2.34267e-15	-0.631816	0.278	0.661	3.81831e-11	Kidney1	Thy1
2.37103e-15	0.281542	0.967	0.807	3.86453e-11	Kidney1	Gsr
2.58141e-15	0.444382	0.667	0.405	4.20743e-11	Kidney1	Foxc1
2.7051e-15	0.3759	0.978	0.915	4.40905e-11	Kidney1	Mllt11
2.91033e-15	0.320189	0.711	0.397	4.74354e-11	Kidney1	Dnase2a
3.04542e-15	-0.273923	1	1	4.96373e-11	Kidney1	Rpl36a
3.20249e-15	-0.387894	0.967	0.995	5.21974e-11	Kidney1	Selm
3.37428e-15	-0.251216	0.289	0.723	5.49974e-11	Kidney1	Ripk3
3.42758e-15	-0.304181	1	1	5.58662e-11	Kidney1	Rpl41
3.67014e-15	-0.757413	0.211	0.627	5.98195e-11	Kidney1	Igf1
4.30156e-15	0.332364	0.956	0.907	7.01112e-11	Kidney1	Bcl2l1
4.62392e-15	0.376331	0.456	0.158	7.53653e-11	Kidney1	Fam150a
6.11066e-15	0.325147	0.933	0.859	9.95977e-11	Kidney1	Ndnl2
6.11228e-15	-0.255259	1	1	9.9624e-11	Kidney1	Rps9
6.36019e-15	-0.390787	0.9	0.98	1.03665e-10	Kidney1	Dap
6.5995e-15	0.320316	0.911	0.819	1.07565e-10	Kidney1	Zc2hc1a
7.35858e-15	0.343613	0.878	0.606	1.19937e-10	Kidney1	Aplp1
7.53386e-15	0.303123	0.967	0.925	1.22794e-10	Kidney1	Pkig
7.91269e-15	-0.84694	0.589	0.827	1.28969e-10	Kidney1	Cxcl12
8.38613e-15	-0.376135	0.678	0.916	1.36685e-10	Kidney1	Col12a1
8.59449e-15	-0.462729	0.989	0.997	1.40082e-10	Kidney1	Ahnak
9.06799e-15	-0.528143	0.567	0.824	1.47799e-10	Kidney1	Lrrc32
9.38755e-15	-0.268987	1	1	1.53008e-10	Kidney1	Rpl18
1.19277e-14	0.264894	0.867	0.664	1.94409e-10	Kidney1	Stk4
1.43918e-14	0.307036	0.944	0.878	2.34572e-10	Kidney1	Ide
1.58267e-14	0.655971	0.478	0.182	2.57959e-10	Kidney1	Cox6b2
1.61368e-14	-0.350964	0.622	0.874	2.63014e-10	Kidney1	Adam19
1.65874e-14	0.264959	0.911	0.829	2.70358e-10	Kidney1	Cetn2
1.69499e-14	0.335825	0.622	0.31	2.76267e-10	Kidney1	Epha4
1.70844e-14	-0.437591	0.844	0.967	2.78459e-10	Kidney1	Fxyd5
1.72397e-14	0.522941	0.944	0.867	2.80989e-10	Kidney1	Uchl1
2.42358e-14	0.295323	0.911	0.766	3.95019e-10	Kidney1	Cep170b
3.10985e-14	0.434146	1	1	5.06875e-10	Kidney1	Igfbp7
3.14675e-14	0.297899	1	0.996	5.12888e-10	Kidney1	Aes
3.16801e-14	-0.419255	0.422	0.768	5.16354e-10	Kidney1	Col11a1
3.65859e-14	-0.386278	0.811	0.907	5.96313e-10	Kidney1	Soat1
3.83794e-14	0.256269	0.856	0.722	6.25546e-10	Kidney1	Chpt1
3.84013e-14	-0.349684	0.522	0.825	6.25902e-10	Kidney1	Blvrb
4.29045e-14	-0.273009	0.733	0.92	6.99301e-10	Kidney1	Adk
4.40552e-14	0.259765	0.811	0.406	7.18056e-10	Kidney1	Hoxc10
4.85404e-14	-0.459573	0.933	0.992	7.9116e-10	Kidney1	Kdelr2
6.48037e-14	0.345506	0.844	0.689	1.05624e-09	Kidney1	Steap1
6.67751e-14	0.414449	0.889	0.703	1.08837e-09	Kidney1	Clcn5
7.16274e-14	0.406308	1	1	1.16746e-09	Kidney1	H3f3b
7.86953e-14	-0.332	0.844	0.939	1.28266e-09	Kidney1	Copz2
8.70147e-14	0.285865	0.989	0.979	1.41825e-09	Kidney1	Rtn3
9.38572e-14	0.273791	0.944	0.929	1.52978e-09	Kidney1	Dazap2
1.15677e-13	-0.541383	0.189	0.583	1.88543e-09	Kidney1	Ptx3
1.33085e-13	0.316542	0.989	0.981	2.16915e-09	Kidney1	Tmem160
1.4104e-13	-0.678845	0.9	0.974	2.29881e-09	Kidney1	Itgb5
1.4432e-13	-0.323018	0.856	0.978	2.35228e-09	Kidney1	Ak1
1.48576e-13	0.308615	0.878	0.745	2.42165e-09	Kidney1	Ifngr1
1.51244e-13	-0.479018	0.967	0.994	2.46513e-09	Kidney1	Id3
1.70282e-13	0.288922	1	0.995	2.77542e-09	Kidney1	Pfdn1
1.70431e-13	-0.296596	0.878	0.968	2.77786e-09	Kidney1	Map2k3
1.7307e-13	0.393488	0.911	0.8	2.82086e-09	Kidney1	Ammecr1
1.74666e-13	0.372176	0.989	0.926	2.84689e-09	Kidney1	Shisa4
1.775e-13	0.378419	0.611	0.313	2.89307e-09	Kidney1	F2rl1
1.95572e-13	-0.313983	0.778	0.935	3.18763e-09	Kidney1	P3h4
2.05783e-13	0.286564	0.978	0.988	3.35405e-09	Kidney1	Ywhaq
2.14389e-13	0.297064	0.867	0.707	3.49433e-09	Kidney1	Pgpep1
2.15875e-13	0.261041	0.9	0.742	3.51855e-09	Kidney1	Mid1ip1
2.17589e-13	-0.295072	0.967	0.987	3.54649e-09	Kidney1	Sar1a
2.17606e-13	-0.716384	0.978	0.996	3.54676e-09	Kidney1	Tm4sf1
2.27187e-13	0.30388	0.978	0.995	3.70293e-09	Kidney1	Timm8b
3.22717e-13	-0.370156	0.8	0.939	5.25996e-09	Kidney1	Lrp1
3.43585e-13	0.292353	0.867	0.798	5.60009e-09	Kidney1	Acadl
3.48414e-13	-0.69083	0.178	0.561	5.6788e-09	Kidney1	Tbx20
4.4678e-13	-0.510158	0.744	0.93	7.28206e-09	Kidney1	Prdx4
4.56342e-13	0.435602	0.8	0.598	7.43792e-09	Kidney1	Mcam
4.6911e-13	0.380326	1	1	7.64602e-09	Kidney1	mt-Nd2
4.85822e-13	-0.262753	1	1	7.91842e-09	Kidney1	Rpl36
4.85823e-13	0.312685	1	0.999	7.91842e-09	Kidney1	mt-Co1
5.28434e-13	-0.321297	0.722	0.89	8.61295e-09	Kidney1	Lamc1
5.5519e-13	-0.297728	0.556	0.818	9.04904e-09	Kidney1	Pla2g4a
5.63617e-13	-0.580904	0.822	0.917	9.18639e-09	Kidney1	Mmd
5.78457e-13	0.377244	0.889	0.772	9.42827e-09	Kidney1	Nr2f2
6.27235e-13	-0.263396	0.878	0.97	1.02233e-08	Kidney1	Kctd10
7.0155e-13	-0.264285	0.989	0.991	1.14346e-08	Kidney1	Rpl27a
7.27537e-13	0.314579	0.878	0.745	1.18581e-08	Kidney1	Prkci
7.62167e-13	0.316387	0.944	0.819	1.24226e-08	Kidney1	Tead2
8.45941e-13	-0.257707	1	1	1.3788e-08	Kidney1	Rplp0
8.70025e-13	0.59125	0.911	0.874	1.41805e-08	Kidney1	Palld
9.10054e-13	0.257768	0.833	0.659	1.4833e-08	Kidney1	Slco3a1
9.66075e-13	0.402843	0.989	0.969	1.57461e-08	Kidney1	Sox4
9.74641e-13	-0.280179	0.256	0.621	1.58857e-08	Kidney1	Jph2
9.8254e-13	0.352827	0.956	0.922	1.60144e-08	Kidney1	Atp6v1a
1.0091e-12	-0.391045	0.811	0.958	1.64472e-08	Kidney1	Ugdh
1.12494e-12	-0.279351	0.989	0.997	1.83354e-08	Kidney1	Mrpl52
1.26512e-12	0.363508	0.967	0.95	2.06203e-08	Kidney1	Igf1r
1.27989e-12	0.275269	1	0.99	2.0861e-08	Kidney1	Park7
1.62476e-12	0.375436	0.911	0.774	2.64819e-08	Kidney1	Btg2
1.64322e-12	-0.251897	1	1	2.67828e-08	Kidney1	Rpl28
1.77211e-12	0.582133	1	0.979	2.88835e-08	Kidney1	Akap12
1.79858e-12	0.598829	1	0.999	2.93151e-08	Kidney1	Wbp5
1.84868e-12	-0.303775	0.756	0.932	3.01317e-08	Kidney1	Qsox1
2.0475e-12	1.40916	0.744	0.495	3.33723e-08	Kidney1	Igfbp2
2.52027e-12	-0.422156	0.511	0.804	4.10779e-08	Kidney1	Pcolce2
2.52803e-12	-0.334563	1	1	4.12043e-08	Kidney1	Mif
3.05183e-12	0.276531	0.944	0.924	4.97418e-08	Kidney1	Zfand6
3.08606e-12	0.451032	0.433	0.168	5.02997e-08	Kidney1	Lmcd1
3.45234e-12	0.361499	0.6	0.282	5.62696e-08	Kidney1	Perp
3.48607e-12	0.33412	1	0.988	5.68194e-08	Kidney1	Cox14
3.76916e-12	0.266086	0.822	0.652	6.14336e-08	Kidney1	Limk2
3.98215e-12	-0.338157	0.078	0.463	6.49051e-08	Kidney1	Frzb
4.15551e-12	0.406226	0.978	0.952	6.77307e-08	Kidney1	Ddah1
4.43317e-12	0.386965	1	1	7.22562e-08	Kidney1	mt-Nd1
4.51777e-12	-0.262479	1	0.976	7.36352e-08	Kidney1	Rcn1
5.00299e-12	0.277399	0.989	0.995	8.15438e-08	Kidney1	Cdk4
5.46727e-12	-0.416972	0.278	0.632	8.9111e-08	Kidney1	Col6a1
5.58708e-12	0.292899	0.656	0.379	9.10637e-08	Kidney1	Fos
5.94962e-12	0.298989	0.733	0.449	9.69729e-08	Kidney1	Gadd45a
6.07055e-12	0.290911	0.644	0.456	9.89439e-08	Kidney1	Speg
6.20173e-12	0.340757	1	0.992	1.01082e-07	Kidney1	Cpe
6.43533e-12	-0.607958	0.133	0.509	1.04889e-07	Kidney1	Dcn
6.53945e-12	0.363256	0.689	0.429	1.06586e-07	Kidney1	Cd59a
6.71435e-12	0.316455	0.978	0.95	1.09437e-07	Kidney1	Coro1c
6.81997e-12	-0.324787	0.089	0.473	1.11159e-07	Kidney1	Olfml3
7.91177e-12	-0.2625	1	1	1.28954e-07	Kidney1	Rpl10
8.129e-12	0.769089	0.967	0.961	1.32495e-07	Kidney1	Hbegf
9.19521e-12	-0.407635	0.089	0.461	1.49873e-07	Kidney1	Tcf21
1.10613e-11	0.263234	0.978	0.977	1.80288e-07	Kidney1	Glud1
1.1236e-11	-0.362808	0.722	0.873	1.83136e-07	Kidney1	Oaf
1.20693e-11	0.298896	0.811	0.65	1.96718e-07	Kidney1	Smim1
1.31733e-11	0.273712	0.944	0.926	2.14711e-07	Kidney1	Tusc3
1.71084e-11	-0.32225	0.9	0.968	2.78849e-07	Kidney1	Mmp14
1.75129e-11	-0.285001	1	1	2.85443e-07	Kidney1	Rps26
1.96285e-11	0.358452	0.667	0.435	3.19924e-07	Kidney1	Nox4
2.29692e-11	0.311209	0.867	0.685	3.74374e-07	Kidney1	Nuak2
3.16006e-11	-0.295163	0.9	0.975	5.15059e-07	Kidney1	Nbl1
3.23419e-11	0.381638	0.978	0.971	5.27141e-07	Kidney1	Marcksl1
3.24815e-11	0.251829	0.9	0.761	5.29416e-07	Kidney1	Slc20a1
3.48799e-11	0.27099	0.967	0.966	5.68508e-07	Kidney1	Ktn1
3.5395e-11	-0.265999	1	1	5.76903e-07	Kidney1	Rps2
4.54412e-11	-0.266073	0.544	0.828	7.40646e-07	Kidney1	Nav1
5.28184e-11	0.253331	0.978	0.924	8.60886e-07	Kidney1	Kif1b
6.56171e-11	0.288289	0.867	0.713	1.06949e-06	Kidney1	Btg1
6.86698e-11	0.348573	0.956	0.904	1.11925e-06	Kidney1	Tubb2b
7.20367e-11	0.275695	0.978	0.913	1.17413e-06	Kidney1	Zmiz1
7.7319e-11	0.367258	1	1	1.26022e-06	Kidney1	Actn1
9.1403e-11	0.267074	0.989	0.895	1.48978e-06	Kidney1	Ddr1
9.26914e-11	0.311669	0.989	0.982	1.51078e-06	Kidney1	Wnk1
9.41669e-11	0.267887	0.767	0.583	1.53483e-06	Kidney1	Dusp6
9.61722e-11	0.370892	0.922	0.744	1.56751e-06	Kidney1	Zfp36l1
9.79748e-11	-0.320521	0.911	0.958	1.59689e-06	Kidney1	Unc5b
9.99524e-11	-0.266298	0.989	0.996	1.62912e-06	Kidney1	Serp1
1.02065e-10	0.280044	0.944	0.951	1.66355e-06	Kidney1	Ccni
1.03354e-10	0.357376	1	0.977	1.68457e-06	Kidney1	App
1.17848e-10	-0.394556	0.456	0.783	1.9208e-06	Kidney1	Ltbp2
1.21622e-10	0.387741	0.9	0.775	1.98231e-06	Kidney1	Twsg1
1.22087e-10	0.251111	0.944	0.908	1.98989e-06	Kidney1	Ttc3
1.24929e-10	-1.74637	0.844	0.95	2.03622e-06	Kidney1	Mgp
1.38262e-10	-0.334795	0.989	1	2.25354e-06	Kidney1	Anxa5
1.53516e-10	0.274754	1	0.992	2.50216e-06	Kidney1	H3f3a
1.73271e-10	0.278435	0.989	0.995	2.82415e-06	Kidney1	Cnn3
1.98619e-10	-0.408046	0.844	0.926	3.2373e-06	Kidney1	Col5a1
2.01513e-10	-0.443671	0.244	0.57	3.28446e-06	Kidney1	Gdf6
2.15861e-10	0.250279	0.778	0.605	3.51832e-06	Kidney1	Pik3r1
2.78646e-10	-0.331864	0.922	0.981	4.54164e-06	Kidney1	Myadm
3.05939e-10	0.385177	0.967	0.88	4.9865e-06	Kidney1	Cdh2
3.10486e-10	-0.389194	0.189	0.507	5.0606e-06	Kidney1	Grem2
3.2728e-10	0.254518	0.889	0.707	5.33434e-06	Kidney1	Atxn1
3.95041e-10	0.300412	0.789	0.637	6.43878e-06	Kidney1	Gpc6
4.45867e-10	0.269306	0.533	0.269	7.26718e-06	Kidney1	Tshz2
5.29601e-10	0.611408	1	0.972	8.63196e-06	Kidney1	Slc6a6
5.34706e-10	0.327965	0.978	0.955	8.71517e-06	Kidney1	Rsrp1
5.87539e-10	-0.439256	1	0.982	9.5763e-06	Kidney1	Fstl1
6.6937e-10	0.26253	0.756	0.566	1.09101e-05	Kidney1	Mgst3
6.6984e-10	-0.304313	0.178	0.501	1.09177e-05	Kidney1	Sfrp1
7.62022e-10	0.284128	1	0.999	1.24202e-05	Kidney1	Ybx1
8.33553e-10	0.255395	0.878	0.846	1.35861e-05	Kidney1	Hint2
8.83048e-10	-0.503741	0.867	0.936	1.43928e-05	Kidney1	Itga5
8.97558e-10	0.276777	0.278	0.085	1.46293e-05	Kidney1	Adgra1
1.16401e-09	0.370563	1	0.974	1.89722e-05	Kidney1	Dst
1.24806e-09	-0.881291	0.289	0.608	2.03421e-05	Kidney1	Igfbp4
1.28777e-09	0.671299	0.256	0.074	2.09894e-05	Kidney1	Igfbp5
1.33087e-09	-0.325999	0.756	0.902	2.16919e-05	Kidney1	Ifi27
1.39939e-09	-0.27428	0.978	0.989	2.28086e-05	Kidney1	Gpx8
1.40071e-09	0.260326	0.633	0.384	2.28301e-05	Kidney1	Sbsn
2.31448e-09	-0.532058	0.911	0.956	3.77238e-05	Kidney1	Card19
2.51363e-09	0.382383	0.767	0.714	4.09697e-05	Kidney1	Arhgap29
2.61816e-09	-0.314993	0.756	0.918	4.26733e-05	Kidney1	Mxra8
2.93909e-09	0.304636	0.9	0.919	4.79043e-05	Kidney1	Bag2
3.25435e-09	0.276098	0.989	0.985	5.30427e-05	Kidney1	Nisch
3.3392e-09	0.265534	0.733	0.524	5.44255e-05	Kidney1	Ddit4l
4.44995e-09	0.259126	0.922	0.918	7.25297e-05	Kidney1	Pum2
4.75605e-09	0.300181	0.822	0.641	7.75189e-05	Kidney1	Npnt
6.07564e-09	-0.263999	0.433	0.74	9.90268e-05	Kidney1	Vcam1
6.20963e-09	0.283589	0.933	0.892	0.000101211	Kidney1	Pbx1
6.55225e-09	-0.257463	0.611	0.844	0.000106795	Kidney1	Creb3l1
6.66347e-09	0.328876	0.944	0.918	0.000108608	Kidney1	H2afv
6.71644e-09	0.292332	0.978	0.991	0.000109471	Kidney1	Atp6v1f
6.74161e-09	0.289957	0.967	0.929	0.000109881	Kidney1	Sdc4
7.16399e-09	0.458706	1	0.975	0.000116766	Kidney1	Phlda1
7.74171e-09	-0.775292	0.944	0.949	0.000126182	Kidney1	Ptgs2
8.03822e-09	0.285215	1	0.984	0.000131015	Kidney1	Atxn7l3b
9.78643e-09	-0.284419	0.967	0.984	0.000159509	Kidney1	Txndc5
1.0424e-08	-0.26782	0.989	0.997	0.000169901	Kidney1	Reep5
1.07721e-08	-0.258455	0.989	0.98	0.000175575	Kidney1	Efemp2
1.10372e-08	0.257489	0.622	0.395	0.000179895	Kidney1	Egr1
1.12797e-08	-0.273609	1	0.997	0.000183847	Kidney1	Slc25a5
1.13509e-08	0.262361	0.933	0.895	0.000185008	Kidney1	Pfn2
1.23869e-08	0.306687	1	0.999	0.000201894	Kidney1	Tmsb10
1.31267e-08	0.340421	0.967	0.927	0.000213952	Kidney1	Gclm
1.54679e-08	0.286567	0.967	0.96	0.000252112	Kidney1	Tmbim4
1.5885e-08	0.325483	0.989	0.983	0.00025891	Kidney1	Pea15a
1.66192e-08	-0.300046	0.644	0.791	0.000270877	Kidney1	Pcdh19
1.78054e-08	0.289573	0.922	0.89	0.00029021	Kidney1	Rb1cc1
1.84927e-08	0.252213	0.9	0.843	0.000301412	Kidney1	Mgat4b
2.12528e-08	0.329567	1	0.979	0.000346399	Kidney1	Zbtb20
2.39714e-08	0.383566	1	0.989	0.000390709	Kidney1	Itm2b
2.50181e-08	-0.297137	0.4	0.7	0.000407769	Kidney1	Nqo1
2.64061e-08	-0.365477	0.211	0.504	0.000430393	Kidney1	Cemip
2.6494e-08	0.2904	0.833	0.743	0.000431826	Kidney1	Errfi1
2.69212e-08	0.29193	0.944	0.944	0.000438789	Kidney1	Ier5
2.78808e-08	0.386182	0.956	0.922	0.000454429	Kidney1	Dlc1
3.59254e-08	-0.250274	0.989	0.999	0.000585548	Kidney1	Ssr4
3.91897e-08	-0.808803	0.378	0.625	0.000638754	Kidney1	Wisp2
4.09875e-08	0.600354	0.978	0.988	0.000668055	Kidney1	Hspb1
4.11814e-08	0.39682	0.978	0.957	0.000671216	Kidney1	Ier3
4.12404e-08	-0.322594	0.078	0.351	0.000672177	Kidney1	Dkk2
4.76571e-08	-0.258272	0.289	0.619	0.000776763	Kidney1	Fam111a
5.34366e-08	-0.253939	0.611	0.856	0.000870963	Kidney1	Tfpi
5.40004e-08	0.612049	0.933	0.877	0.000880153	Kidney1	Hist1h1c
5.40766e-08	0.494365	0.978	0.974	0.000881395	Kidney1	Psap
5.77675e-08	0.754511	0.844	0.82	0.000941552	Kidney1	Fst
6.43576e-08	0.420518	0.989	0.987	0.00104896	Kidney1	Cryab
6.71948e-08	-0.323054	0.111	0.383	0.00109521	Kidney1	Hsd11b1
9.28115e-08	-0.435443	0.467	0.725	0.00151273	Kidney1	Tubb3
9.72009e-08	-0.297745	0.567	0.793	0.00158428	Kidney1	Ass1
1.21661e-07	-0.301641	0.078	0.355	0.00198296	Kidney1	Nrn1
1.37839e-07	0.302264	0.967	0.977	0.00224665	Kidney1	Rras2
1.48718e-07	0.285576	0.9	0.838	0.00242395	Kidney1	Grina
1.57207e-07	0.266826	0.733	0.605	0.00256232	Kidney1	Gclc
1.67453e-07	0.363148	1	0.985	0.00272932	Kidney1	Col4a1
2.04598e-07	-0.298699	0.9	0.983	0.00333474	Kidney1	S100a13
2.56361e-07	-0.276102	0.9	0.952	0.00417842	Kidney1	Mical2
2.7637e-07	-0.272724	1	0.997	0.00450456	Kidney1	Pmepa1
3.05189e-07	0.296793	1	1	0.00497427	Kidney1	mt-Cytb
3.44756e-07	-0.275737	0.978	0.973	0.00561918	Kidney1	Fscn1
3.47817e-07	0.661489	0.467	0.271	0.00566906	Kidney1	Sprr1a
3.92202e-07	-1.70071	0.811	0.881	0.00639251	Kidney1	Cck
3.93719e-07	-0.616715	0.2	0.47	0.00641723	Kidney1	Actg2
4.03474e-07	-0.402827	0.422	0.658	0.00657623	Kidney1	Adm
4.05673e-07	-0.317357	0.156	0.415	0.00661207	Kidney1	Col6a3
4.26984e-07	-0.367245	0.578	0.783	0.00695941	Kidney1	Fam101b
4.39426e-07	0.334137	0.822	0.749	0.00716221	Kidney1	Meis2
4.39605e-07	-0.26432	1	1	0.00716512	Kidney1	Rhoc
4.40706e-07	0.307467	0.989	0.976	0.00718306	Kidney1	Fhl2
4.53065e-07	-0.283629	0.5	0.78	0.00738451	Kidney1	Fabp5
4.54282e-07	-0.320394	0.556	0.775	0.00740435	Kidney1	Ptprb
5.12658e-07	0.250451	0.911	0.897	0.00835581	Kidney1	Tpp1
5.90571e-07	0.458495	1	0.98	0.00962572	Kidney1	Hist1h2bc
6.34556e-07	0.276203	0.833	0.782	0.0103426	Kidney1	Rusc2
8.68849e-07	0.285675	1	0.989	0.0141614	Kidney1	Vmp1
8.73728e-07	-0.278757	0.222	0.487	0.0142409	Kidney1	Aldh1a1
8.81451e-07	0.348883	0.967	0.97	0.0143668	Kidney1	Tnc
8.84054e-07	0.341697	1	0.995	0.0144092	Kidney1	Cd81
9.2686e-07	0.283735	0.922	0.746	0.0151069	Kidney1	Lurap1l
1.02927e-06	0.383186	1	0.999	0.0167762	Kidney1	Tuba1a
1.12857e-06	0.441602	0.867	0.846	0.0183946	Kidney1	Dusp1
1.30646e-06	0.941184	1	0.989	0.021294	Kidney1	Csrp1
1.32704e-06	-1.01567	0.856	0.911	0.0216294	Kidney1	Rbp1
1.39163e-06	0.447663	1	0.944	0.0226822	Kidney1	Arl6ip1
1.42852e-06	0.396292	0.656	0.544	0.0232835	Kidney1	Gpr137b
1.54369e-06	0.270932	0.989	0.996	0.0251606	Kidney1	Atp6v1g1
1.5856e-06	-0.378081	0.856	0.962	0.0258438	Kidney1	Csrp2
1.83187e-06	-0.676421	0.367	0.604	0.0298577	Kidney1	Ccl7
1.90296e-06	0.271684	0.9	0.886	0.0310163	Kidney1	Ogt
2.07047e-06	0.252886	1	0.999	0.0337466	Kidney1	Psma7
2.56345e-06	-0.258256	0.1	0.328	0.0417816	Kidney1	Fxyd6
3.1593e-06	0.314733	0.911	0.885	0.0514934	Kidney1	Hk2
3.20951e-06	0.268517	0.867	0.819	0.0523117	Kidney1	Pxdc1
3.48711e-06	0.297552	0.989	0.988	0.0568363	Kidney1	Lpp
3.50364e-06	0.335233	0.3	0.137	0.0571058	Kidney1	Lce1g
3.78516e-06	0.449566	1	0.994	0.0616944	Kidney1	Ctsd
3.86156e-06	0.276447	0.867	0.856	0.0629395	Kidney1	Maff
4.67987e-06	-0.32446	0.2	0.461	0.0762772	Kidney1	Krt19
5.61955e-06	-0.317098	0.689	0.814	0.0915931	Kidney1	Psat1
6.03772e-06	-0.607202	0.9	0.936	0.0984088	Kidney1	Ckb
6.16014e-06	-0.2774	0.778	0.953	0.100404	Kidney1	Plpp1
6.41475e-06	-0.690703	0.8	0.766	0.104554	Kidney1	Clu
6.99481e-06	-0.394087	0.356	0.577	0.114008	Kidney1	Prrx2
7.14176e-06	-0.280487	0.989	0.991	0.116403	Kidney1	Crip2
8.3182e-06	0.396308	1	0.993	0.135578	Kidney1	Sepw1
8.90247e-06	0.444217	0.989	0.979	0.145101	Kidney1	Ankrd1
1.01132e-05	0.300032	1	0.982	0.164836	Kidney1	Col4a2
1.06469e-05	-0.394286	0.322	0.552	0.173534	Kidney1	Glipr1
1.10472e-05	0.26469	0.944	0.919	0.180059	Kidney1	Myl12b
1.42239e-05	0.638135	1	0.998	0.231835	Kidney1	Ctsl
1.76388e-05	0.284236	1	0.981	0.287495	Kidney1	Vcl
2.82593e-05	-0.262493	0.389	0.604	0.460599	Kidney1	Cxcl16
3.42285e-05	-0.623197	0.122	0.333	0.55789	Kidney1	Esm1
3.693e-05	-0.335219	0.833	0.908	0.601922	Kidney1	Hmox1
0.000111057	-0.272079	1	1	1	Kidney1	Serpine1
0.000113109	-0.311563	0.933	0.949	1	Kidney1	S100a16
0.000128339	0.257268	0.967	0.976	1	Kidney1	Cmtm7
0.000142596	0.337745	1	0.998	1	Kidney1	Prdx1
0.000150083	0.250174	0.978	0.95	1	Kidney1	Serf1
0.000163032	-0.29449	0.656	0.808	1	Kidney1	Creg1
0.000226414	-0.254097	0.544	0.671	1	Kidney1	Mmp2
0.000238014	0.335331	0.689	0.574	1	Kidney1	Notch2
0.000338797	0.271449	0.956	0.923	1	Kidney1	Fhl1
0.000371534	-0.283375	1	1	1	Kidney1	Actb
0.000477365	-0.359452	1	0.998	1	Kidney1	Cst3
0.000827404	0.444454	0.844	0.814	1	Kidney1	Cdkn2a
0.000840112	-0.317418	0.389	0.54	1	Kidney1	Cst6
0.00085738	-0.473858	0.311	0.458	1	Kidney1	Grem1
0.000997328	-0.473979	0.167	0.337	1	Kidney1	Crct1
0.00173732	-0.300191	0.178	0.347	1	Kidney1	Ccl17
0.00176196	0.495974	1	0.988	1	Kidney1	Tagln
0.00197849	-0.394097	0.478	0.617	1	Kidney1	Smoc2
0.00200624	-0.269527	1	0.999	1	Kidney1	Acta2
0.00268313	0.393418	0.767	0.78	1	Kidney1	Cnn1
0.00456281	-0.290245	1	0.987	1	Kidney1	Prss23
0.00603371	-0.671291	0.467	0.36	1	Kidney1	Krt18
0.0112698	-0.282854	1	1	1	Kidney1	Cd63
0.0143013	0.300124	0.956	0.939	1	Kidney1	Metrnl
0.0161556	-0.80201	0.622	0.738	1	Kidney1	Tnnt2
0.0176139	0.252726	1	0.99	1	Kidney1	Ccnd2
0.0286232	-0.332371	0.467	0.617	1	Kidney1	Ccl2
0.0669946	-0.29424	0.578	0.617	1	Kidney1	Sox9
0.0971149	-0.30514	0.989	0.968	1	Kidney1	Timp3
0.311265	0.411013	0.967	0.984	1	Kidney1	Neat1
0.691894	-0.306357	0.933	0.923	1	Kidney1	Cd9
0.908707	0.393754	0.744	0.747	1	Kidney1	Plac8

## Sheet: Kidney2 
p_val	avg_logFC	pct.1	pct.2	p_val_adj	cluster	gene
1.92174e-158	0.349124	0.726	0.005	3.13224e-154	Kidney2	Ap1m2
4.87784e-157	0.352363	0.694	0.003	7.9504e-153	Kidney2	Prss8
4.87784e-157	0.335524	0.694	0.003	7.9504e-153	Kidney2	Cblc
1.08647e-154	0.80109	0.984	0.035	1.77084e-150	Kidney2	Crb3
1.29082e-154	0.435768	0.71	0.005	2.1039e-150	Kidney2	Mal2
1.324e-153	0.853964	0.839	0.017	2.15798e-149	Kidney2	Rab25
3.38234e-152	0.952954	0.935	0.029	5.51288e-148	Kidney2	Kcnk1
1.67037e-151	1.45013	0.984	0.038	2.72253e-147	Kidney2	Mal
3.0415e-148	1.02507	0.984	0.04	4.95734e-144	Kidney2	Wnt7a
7.64815e-147	1.01194	0.935	0.033	1.24657e-142	Kidney2	Cdh1
5.59736e-143	0.396968	0.71	0.008	9.12314e-139	Kidney2	Cdcp1
4.8112e-141	0.27542	0.629	0.003	7.84177e-137	Kidney2	Marveld3
5.48223e-138	0.265282	0.645	0.005	8.93549e-134	Kidney2	Esrp1
1.20454e-136	0.313019	0.661	0.007	1.96328e-132	Kidney2	Ildr1
7.7573e-136	0.747345	0.919	0.038	1.26436e-131	Kidney2	St14
6.6657e-132	0.363247	0.677	0.009	1.08644e-127	Kidney2	Bspry
1.03543e-131	0.552882	0.758	0.018	1.68765e-127	Kidney2	Lamb3
4.63839e-131	0.441625	0.774	0.02	7.56011e-127	Kidney2	Arhgef16
1.25541e-130	0.876462	0.952	0.048	2.04619e-126	Kidney2	Itgb4
3.49653e-128	0.359844	0.71	0.014	5.69899e-124	Kidney2	Lama3
2.06968e-126	1.95096	0.984	0.059	3.37338e-122	Kidney2	Cldn7
1.08785e-125	1.69799	0.968	0.056	1.77309e-121	Kidney2	Fermt1
1.255e-123	0.281313	0.645	0.009	2.04552e-119	Kidney2	Irf6
4.0539e-122	2.07376	1	0.068	6.60745e-118	Kidney2	Epcam
7.94825e-122	0.470655	0.613	0.008	1.29548e-117	Kidney2	Il18r1
5.07332e-118	0.338674	0.548	0.004	8.269e-114	Kidney2	Smim22
3.02117e-117	1.06542	0.839	0.039	4.92421e-113	Kidney2	Prss22
4.72699e-117	0.418893	0.613	0.009	7.70451e-113	Kidney2	Itgb6
5.00018e-117	0.261275	0.597	0.008	8.14979e-113	Kidney2	Ocln
7.85299e-116	0.365101	0.694	0.018	1.27996e-111	Kidney2	Cgn
1.689e-115	0.441956	0.758	0.026	2.75291e-111	Kidney2	Moxd1
3.28271e-115	0.631079	0.839	0.039	5.35048e-111	Kidney2	Wnt7b
8.43454e-115	1.03677	0.952	0.063	1.37475e-110	Kidney2	Spint1
2.20894e-114	0.302579	0.581	0.008	3.60035e-110	Kidney2	Dsg2
7.66739e-113	1.14717	0.935	0.061	1.24971e-108	Kidney2	Tacstd2
3.40112e-110	0.491975	0.774	0.031	5.54348e-106	Kidney2	Smagp
3.35251e-105	0.382364	0.758	0.033	5.46426e-101	Kidney2	Nipal2
8.15608e-105	0.410142	0.726	0.029	1.32936e-100	Kidney2	Krtcap3
6.34397e-104	0.406043	0.548	0.008	1.034e-99	Kidney2	A630095E13Rik
7.31596e-103	0.862395	0.919	0.071	1.19243e-98	Kidney2	Slc4a11
1.77431e-101	0.602932	0.935	0.076	2.89195e-97	Kidney2	Gipc2
7.10152e-99	0.349007	0.661	0.024	1.15748e-94	Kidney2	Pkp3
1.2522e-98	0.305265	0.629	0.019	2.04096e-94	Kidney2	Blnk
1.02028e-96	2.05564	0.935	0.086	1.66296e-92	Kidney2	Wfdc2
1.73595e-96	1.48371	0.935	0.081	2.82943e-92	Kidney2	Cldn3
5.41486e-94	0.888743	0.952	0.086	8.82568e-90	Kidney2	Cdh16
6.97119e-94	0.426233	0.629	0.023	1.13623e-89	Kidney2	Pvrl4
1.12896e-92	0.412033	0.581	0.017	1.84009e-88	Kidney2	Paqr5
6.55634e-92	0.430868	0.871	0.069	1.06862e-87	Kidney2	Shtn1
3.73578e-91	0.509777	0.871	0.07	6.08895e-87	Kidney2	Galnt3
4.23079e-90	0.317751	0.581	0.018	6.89576e-86	Kidney2	Tmem178
1.21917e-89	2.51665	1	0.125	1.98713e-85	Kidney2	Cldn4
2.44042e-89	0.254334	0.5	0.009	3.97764e-85	Kidney2	Elf3
1.67252e-88	1.23311	1	0.123	2.72605e-84	Kidney2	Lsr
4.24041e-84	1.26534	1	0.135	6.91144e-80	Kidney2	Adgrg1
4.51356e-84	0.562091	0.887	0.084	7.35666e-80	Kidney2	Elovl7
5.06678e-84	0.712824	0.903	0.093	8.25835e-80	Kidney2	Ano1
6.11207e-83	0.838442	0.968	0.109	9.96207e-79	Kidney2	Lad1
1.39722e-80	0.316114	0.645	0.033	2.27732e-76	Kidney2	Tmem51
2.18201e-78	0.571889	0.839	0.078	3.55646e-74	Kidney2	Gprc5c
2.43187e-76	0.363535	0.565	0.025	3.96371e-72	Kidney2	Lrrn1
1.12361e-74	0.425853	0.79	0.064	1.83137e-70	Kidney2	Pkhd1
1.4733e-74	2.40562	0.984	0.163	2.40134e-70	Kidney2	Krt7
5.32192e-74	0.351735	0.79	0.067	8.6742e-70	Kidney2	Igsf5
5.30454e-73	0.486112	0.806	0.081	8.64587e-69	Kidney2	Dsp
3.24594e-72	0.405573	0.516	0.021	5.29056e-68	Kidney2	Efhd1
5.78357e-72	0.872625	1	0.144	9.42664e-68	Kidney2	Cadm1
1.10961e-71	0.493815	0.742	0.061	1.80856e-67	Kidney2	Cldn1
1.13332e-71	0.294277	0.597	0.032	1.84721e-67	Kidney2	Tspan8
1.14564e-71	0.694373	0.435	0.011	1.86729e-67	Kidney2	Cldn6
6.87378e-71	0.292478	0.677	0.049	1.12036e-66	Kidney2	Stap2
8.70277e-71	0.420824	0.565	0.028	1.41846e-66	Kidney2	Prom1
4.20795e-70	0.476154	0.677	0.048	6.85854e-66	Kidney2	Pdzk1ip1
8.75085e-69	3.28369	1	0.2	1.4263e-64	Kidney2	Krt8
1.11386e-67	0.304076	0.71	0.059	1.81547e-63	Kidney2	Cyfip2
5.63657e-67	0.255035	0.452	0.015	9.18704e-63	Kidney2	D630011A20Rik
1.33553e-66	0.344837	0.726	0.065	2.17678e-62	Kidney2	Trpv4
3.01354e-66	0.28579	0.629	0.044	4.91177e-62	Kidney2	Tfcp2l1
2.30132e-64	0.896312	0.903	0.133	3.75092e-60	Kidney2	Col4a3
7.8424e-64	1.20461	0.839	0.111	1.27823e-59	Kidney2	Bex1
1.19165e-63	0.325269	0.694	0.066	1.94227e-59	Kidney2	Gal3st1
1.82629e-63	0.341707	0.742	0.073	2.97668e-59	Kidney2	Celsr2
2.48976e-61	0.459745	0.79	0.097	4.05806e-57	Kidney2	Hoxd9
2.74415e-61	0.6864	0.823	0.115	4.47269e-57	Kidney2	Irx2
3.13729e-61	0.601381	0.839	0.121	5.11347e-57	Kidney2	Sema6a
2.23867e-60	0.784484	0.806	0.101	3.64881e-56	Kidney2	Pdgfb
5.14489e-60	0.805391	0.935	0.156	8.38566e-56	Kidney2	Col4a4
2.74214e-59	0.357776	0.677	0.063	4.46941e-55	Kidney2	Hoxd10
1.87075e-57	2.53284	1	0.279	3.04914e-53	Kidney2	Spint2
8.63183e-57	0.510644	0.855	0.146	1.4069e-52	Kidney2	Eps8l2
4.81652e-55	0.293768	0.613	0.056	7.85044e-51	Kidney2	Acer2
4.89101e-55	1.31607	1	0.267	7.97186e-51	Kidney2	Perp
1.15663e-54	0.748225	0.952	0.188	1.88519e-50	Kidney2	Pcbd1
4.70831e-54	0.288581	0.645	0.063	7.67407e-50	Kidney2	Cmtm8
1.69254e-53	0.379088	0.581	0.052	2.75867e-49	Kidney2	Bend5
4.13882e-53	2.3759	1	0.322	6.74586e-49	Kidney2	Sfn
7.12991e-53	3.30046	1	0.331	1.1621e-48	Kidney2	Krt18
2.19303e-52	0.480084	0.887	0.179	3.57441e-48	Kidney2	Stard10
1.03354e-51	0.345619	0.79	0.1	1.68456e-47	Kidney2	Pax8
2.48502e-51	0.876838	0.984	0.27	4.05033e-47	Kidney2	Agrn
1.07672e-50	0.279522	0.516	0.041	1.75495e-46	Kidney2	Foxj1
2.16482e-50	0.529251	0.871	0.187	3.52844e-46	Kidney2	Cyb561
2.18416e-50	0.339277	0.71	0.093	3.55996e-46	Kidney2	Efna1
5.62341e-50	0.288298	0.694	0.081	9.1656e-46	Kidney2	Hnf1b
7.44671e-50	0.347474	0.79	0.127	1.21374e-45	Kidney2	Hoxd8
2.09316e-49	0.397307	0.855	0.163	3.41165e-45	Kidney2	Trp53i11
2.71536e-49	0.418298	0.694	0.092	4.42576e-45	Kidney2	Fhod3
4.29784e-49	0.296046	0.355	0.014	7.00505e-45	Kidney2	Wnt10a
2.84464e-48	0.874479	0.984	0.297	4.63648e-44	Kidney2	Ccbe1
6.47094e-48	0.414283	0.823	0.156	1.0547e-43	Kidney2	Chmp4c
4.14853e-47	0.425241	0.758	0.123	6.76168e-43	Kidney2	Igsf9
7.01139e-47	1.02006	1	0.336	1.14279e-42	Kidney2	Col18a1
5.95804e-46	0.317554	0.758	0.127	9.71101e-42	Kidney2	2310030G06Rik
6.20654e-46	0.29371	0.484	0.038	1.0116e-41	Kidney2	Dcdc2a
7.01916e-46	0.621813	0.887	0.169	1.14405e-41	Kidney2	Spns2
2.08203e-45	0.541693	0.903	0.228	3.39351e-41	Kidney2	C77080
8.02697e-45	0.490752	0.823	0.161	1.30832e-40	Kidney2	Syngr1
2.93195e-44	0.73403	0.968	0.307	4.77879e-40	Kidney2	Mapk13
4.9471e-44	0.978591	0.984	0.389	8.06328e-40	Kidney2	Dnase2a
1.03266e-43	0.334518	0.694	0.107	1.68313e-39	Kidney2	Sh3bgrl2
3.16248e-41	0.65737	0.516	0.056	5.15452e-37	Kidney2	Bex4
3.53643e-41	1.08373	0.984	0.472	5.76403e-37	Kidney2	F11r
3.61238e-41	1.82903	1	0.557	5.88782e-37	Kidney2	Ldhb
4.27449e-41	0.564845	0.79	0.19	6.967e-37	Kidney2	Tmc4
5.81431e-41	0.256431	0.516	0.057	9.47675e-37	Kidney2	Gmfg
5.97764e-41	1.78057	0.952	0.41	9.74296e-37	Kidney2	Krt19
1.17419e-40	2.68832	1	0.551	1.91382e-36	Kidney2	Ly6a
3.26048e-40	3.8976	1	0.755	5.31426e-36	Kidney2	Clu
3.39184e-40	0.85061	0.871	0.225	5.52836e-36	Kidney2	Akr1c19
6.43486e-40	0.464062	0.774	0.162	1.04882e-35	Kidney2	Cdh3
7.93705e-40	0.340389	0.726	0.138	1.29366e-35	Kidney2	St6gal1
5.06141e-39	0.437691	0.726	0.136	8.24959e-35	Kidney2	Lama5
9.48656e-39	1.35628	1	0.496	1.54621e-34	Kidney2	Pmaip1
1.94197e-38	-2.26856	0.968	1	3.16521e-34	Kidney2	Vim
4.04742e-38	0.921836	0.919	0.347	6.59688e-34	Kidney2	Lmo1
8.63076e-38	0.377463	0.823	0.219	1.40673e-33	Kidney2	Chrnb1
1.37433e-37	0.838786	0.839	0.224	2.24002e-33	Kidney2	Tmem171
1.89426e-37	0.821545	1	0.632	3.08745e-33	Kidney2	Serinc2
2.23471e-37	0.330767	0.613	0.096	3.64235e-33	Kidney2	Il18rap
5.37895e-37	0.895854	0.952	0.353	8.76715e-33	Kidney2	Itga3
6.80347e-37	0.310165	0.71	0.139	1.1089e-32	Kidney2	Sorcs2
2.02521e-36	0.311645	0.79	0.197	3.30089e-32	Kidney2	Rassf7
2.06586e-36	0.598942	0.548	0.075	3.36714e-32	Kidney2	Adgra1
4.12827e-36	0.423293	0.774	0.192	6.72866e-32	Kidney2	Trim7
9.08658e-36	-1.45316	0.726	0.998	1.48102e-31	Kidney2	Fstl1
9.37075e-36	-2.11363	0.935	0.999	1.52734e-31	Kidney2	Bgn
1.07448e-35	-1.56404	1	1	1.75129e-31	Kidney2	Sparc
1.24181e-35	0.58752	0.855	0.273	2.02403e-31	Kidney2	Stxbp2
2.5368e-35	1.55296	1	0.919	4.13473e-31	Kidney2	Ly6e
3.10175e-35	-2.15311	0.968	0.999	5.05555e-31	Kidney2	Timp1
3.37154e-35	1.16091	1	0.917	5.49527e-31	Kidney2	Myl12b
3.59959e-35	0.605461	0.903	0.27	5.86697e-31	Kidney2	Scx
4.38795e-35	1.39694	1	0.845	7.15192e-31	Kidney2	Cystm1
7.60771e-35	0.999219	1	0.603	1.23998e-30	Kidney2	Ddit4
8.74088e-35	0.318431	0.387	0.034	1.42468e-30	Kidney2	Tesc
1.04709e-34	-1.42485	0.71	0.991	1.70666e-30	Kidney2	Emp3
1.28435e-34	0.673839	0.871	0.323	2.09336e-30	Kidney2	Bcam
1.42956e-34	0.332021	0.452	0.048	2.33004e-30	Kidney2	Msln
1.56121e-34	0.538272	0.806	0.233	2.54461e-30	Kidney2	Plau
1.64287e-34	0.362884	0.532	0.075	2.67771e-30	Kidney2	Foxq1
1.91624e-34	-1.01147	0.355	0.96	3.12328e-30	Kidney2	Rcn3
6.21639e-34	0.261107	0.565	0.086	1.01321e-29	Kidney2	Irx1
8.57346e-34	-2.21095	0.774	0.992	1.39739e-29	Kidney2	Col1a2
1.00581e-33	-0.959776	0.403	0.958	1.63937e-29	Kidney2	Lrp1
1.02845e-33	-1.08692	0.597	0.987	1.67627e-29	Kidney2	Nid1
1.25201e-33	0.258802	0.565	0.086	2.04065e-29	Kidney2	Ramp1
1.3382e-33	-2.32069	0.855	0.993	2.18114e-29	Kidney2	Col1a1
1.52715e-33	1.80367	0.903	0.401	2.48909e-29	Kidney2	Gdf15
2.22178e-33	0.351051	0.806	0.206	3.62128e-29	Kidney2	Shroom4
3.67374e-33	0.87783	0.952	0.428	5.98783e-29	Kidney2	Aif1l
4.57691e-33	0.356942	0.71	0.168	7.45991e-29	Kidney2	Dyrk3
4.9955e-33	1.19662	1	0.994	8.14216e-29	Kidney2	Ctsd
5.4565e-33	0.704658	0.935	0.426	8.89356e-29	Kidney2	Osbpl3
5.81316e-33	1.04206	0.935	0.405	9.47487e-29	Kidney2	Sorbs2
6.39067e-33	0.331204	0.774	0.209	1.04162e-28	Kidney2	Llgl2
7.07326e-33	1.22862	0.968	0.68	1.15287e-28	Kidney2	Hmgb3
8.50632e-33	0.421481	0.871	0.269	1.38644e-28	Kidney2	Pik3ip1
1.08671e-32	0.674809	0.968	0.468	1.77123e-28	Kidney2	Ezr
1.11168e-32	0.398871	0.823	0.224	1.81193e-28	Kidney2	Cxadr
1.98565e-32	1.25482	1	0.938	3.23641e-28	Kidney2	Plin2
2.40341e-32	0.500169	0.774	0.215	3.91731e-28	Kidney2	Kansl1l
2.75604e-32	-1.32871	0.661	0.978	4.49207e-28	Kidney2	Emp1
3.79785e-32	-1.11268	0.516	0.965	6.19011e-28	Kidney2	Fbn1
3.83669e-32	-1.0781	1	1	6.25342e-28	Kidney2	Lgals1
4.98181e-32	-0.818749	1	1	8.11985e-28	Kidney2	Rplp1
5.15037e-32	0.363	0.758	0.206	8.39459e-28	Kidney2	Flywch2
5.77738e-32	-0.958385	0.613	0.973	9.41655e-28	Kidney2	Loxl1
5.82242e-32	-0.841269	0.403	0.957	9.48996e-28	Kidney2	Fkbp10
8.53825e-32	0.422185	0.806	0.257	1.39165e-27	Kidney2	Nipsnap1
9.98118e-32	0.524506	0.758	0.194	1.62683e-27	Kidney2	Scin
1.10413e-31	0.689254	0.919	0.38	1.79962e-27	Kidney2	Gjb4
1.36001e-31	-0.68197	1	1	2.21668e-27	Kidney2	Rpl41
1.44377e-31	0.977355	0.984	0.639	2.35319e-27	Kidney2	Cdkn2b
3.35621e-31	0.98888	1	0.772	5.47029e-27	Kidney2	Btg2
4.07858e-31	0.546059	0.855	0.327	6.64768e-27	Kidney2	Lamc2
6.35036e-31	-1.43813	0.855	0.994	1.03504e-26	Kidney2	Col4a1
7.60593e-31	0.980228	1	0.625	1.23969e-26	Kidney2	Tmem176b
8.19391e-31	0.915821	0.984	0.564	1.33553e-26	Kidney2	Cxcl16
1.02415e-30	-0.717721	0.645	0.975	1.66927e-26	Kidney2	Ehd2
1.10113e-30	-1.05187	0.484	0.95	1.79472e-26	Kidney2	Pcolce
1.17365e-30	1.01039	1	0.98	1.91293e-26	Kidney2	Jund
1.24748e-30	0.713223	1	0.811	2.03326e-26	Kidney2	Tmem238
1.85982e-30	-0.718092	0.242	0.938	3.03132e-26	Kidney2	Soat1
1.98333e-30	-1.38183	0.532	0.966	3.23264e-26	Kidney2	Inhba
2.8131e-30	0.2803	0.645	0.141	4.58507e-26	Kidney2	Hook2
3.07495e-30	-1.19341	0.742	0.979	5.01186e-26	Kidney2	Ifitm3
3.07912e-30	0.78576	1	0.939	5.01866e-26	Kidney2	Ptbp3
3.49336e-30	0.651249	1	0.89	5.69383e-26	Kidney2	Tpd52
3.5091e-30	0.429658	0.774	0.257	5.71948e-26	Kidney2	Klc3
3.75549e-30	0.601314	0.984	0.791	6.12108e-26	Kidney2	Ormdl2
3.77944e-30	-1.24176	0.79	0.991	6.1601e-26	Kidney2	Col5a2
4.60002e-30	0.689746	0.968	0.799	7.49757e-26	Kidney2	Cd2ap
6.21235e-30	0.425668	0.742	0.186	1.01255e-25	Kidney2	Ptpn13
6.44048e-30	-0.585599	1	1	1.04973e-25	Kidney2	Rpl39
7.74457e-30	-1.06104	0.839	0.992	1.26229e-25	Kidney2	Col4a2
7.96724e-30	0.781638	0.984	0.793	1.29858e-25	Kidney2	Acadl
8.9473e-30	-0.896747	0.435	0.948	1.45832e-25	Kidney2	Col5a1
9.66378e-30	-1.56566	0.871	0.992	1.5751e-25	Kidney2	Lox
1.12512e-29	1.20491	1	0.99	1.83384e-25	Kidney2	Itm2b
1.54982e-29	0.921898	0.935	0.47	2.52605e-25	Kidney2	Rdh10
1.60283e-29	-1.11925	1	0.999	2.61245e-25	Kidney2	Timp2
2.26145e-29	0.329281	0.419	0.053	3.68594e-25	Kidney2	Depdc7
2.48184e-29	-0.794346	0.79	0.995	4.04516e-25	Kidney2	Ptrf
2.85038e-29	0.559285	0.839	0.317	4.64584e-25	Kidney2	Smox
3.17694e-29	0.750293	1	0.869	5.17809e-25	Kidney2	Tgif1
3.3331e-29	0.360848	0.855	0.326	5.43262e-25	Kidney2	Nudt14
3.63188e-29	0.366193	0.823	0.299	5.9196e-25	Kidney2	Arrdc1
3.82182e-29	-0.779137	1	1	6.22918e-25	Kidney2	Rps12
4.0002e-29	0.735714	0.968	0.51	6.51993e-25	Kidney2	Hoxb9
4.05223e-29	-0.682532	0.79	0.989	6.60473e-25	Kidney2	Rcn1
5.02303e-29	-0.825719	0.387	0.944	8.18704e-25	Kidney2	Gng11
5.36616e-29	-1.22146	0.403	0.93	8.7463e-25	Kidney2	Col3a1
6.02878e-29	-0.946624	0.419	0.955	9.82631e-25	Kidney2	Pdpn
6.09153e-29	-0.831789	0.887	0.992	9.92858e-25	Kidney2	Ckap4
9.7911e-29	-0.538878	0.161	0.897	1.59585e-24	Kidney2	Gpx7
1.78536e-28	-1.04835	0.726	0.988	2.90995e-24	Kidney2	Fscn1
1.94349e-28	0.625431	0.984	0.765	3.1677e-24	Kidney2	Pafah1b3
2.93847e-28	-0.794243	0.565	0.971	4.78941e-24	Kidney2	Ctsz
3.58824e-28	0.603179	0.984	0.745	5.84848e-24	Kidney2	Hpcal1
3.83614e-28	1.13104	0.919	0.446	6.25252e-24	Kidney2	Gadd45a
3.95256e-28	0.443035	0.887	0.363	6.44228e-24	Kidney2	Hoxb6
4.23011e-28	0.696672	0.855	0.344	6.89465e-24	Kidney2	Abcc4
4.42134e-28	-0.62269	0.194	0.892	7.20635e-24	Kidney2	Adam19
6.68347e-28	0.866197	0.935	0.534	1.08934e-23	Kidney2	Camk2n1
7.36707e-28	-1.01592	0.5	0.95	1.20076e-23	Kidney2	Loxl2
7.9887e-28	-2.27831	0.968	0.998	1.30208e-23	Kidney2	S100a4
8.29629e-28	-0.701123	0.5	0.944	1.35221e-23	Kidney2	2310022B05Rik
9.09678e-28	-1.11081	0.29	0.895	1.48268e-23	Kidney2	Ptgis
9.47948e-28	-0.512802	0.194	0.908	1.54506e-23	Kidney2	Hspb8
1.10382e-27	0.302488	0.597	0.123	1.79911e-23	Kidney2	Epb41l5
1.22904e-27	0.528958	1	1	2.00322e-23	Kidney2	Slc25a3
1.30407e-27	0.832647	1	0.977	2.1255e-23	Kidney2	App
1.40377e-27	-0.550712	1	1	2.28801e-23	Kidney2	Rps29
1.61398e-27	0.255063	0.71	0.202	2.63063e-23	Kidney2	5730559C18Rik
1.8004e-27	0.332763	0.823	0.297	2.93447e-23	Kidney2	Dync2li1
2.58257e-27	2.16978	1	0.936	4.20933e-23	Kidney2	Spp1
2.75974e-27	0.452155	0.935	0.459	4.49809e-23	Kidney2	Slc9a3r1
3.45341e-27	0.58595	0.903	0.438	5.62871e-23	Kidney2	Wwc1
3.524e-27	-0.735975	0.403	0.959	5.74376e-23	Kidney2	Tgfb1i1
3.92337e-27	0.907134	1	0.957	6.3947e-23	Kidney2	Ier3
4.00905e-27	0.72929	1	0.994	6.53436e-23	Kidney2	Denr
4.03983e-27	-0.730084	0.145	0.855	6.58452e-23	Kidney2	Prrx1
4.94303e-27	0.82274	1	0.952	8.05665e-23	Kidney2	Junb
5.08193e-27	0.445233	0.806	0.299	8.28304e-23	Kidney2	Fam134b
7.68137e-27	0.528396	1	0.965	1.25199e-22	Kidney2	Tecr
7.80324e-27	-0.855393	0.355	0.919	1.27185e-22	Kidney2	Aebp1
9.02844e-27	0.569871	0.952	0.57	1.47155e-22	Kidney2	Ptprk
9.15194e-27	-1.17978	0.452	0.924	1.49167e-22	Kidney2	Cthrc1
1.00148e-26	-0.454215	0.29	0.917	1.63231e-22	Kidney2	Lix1l
1.01194e-26	0.789945	0.952	0.601	1.64935e-22	Kidney2	Bhlhe40
1.10655e-26	0.588401	1	0.946	1.80356e-22	Kidney2	Med10
1.32106e-26	-0.779026	1	1	2.15319e-22	Kidney2	Serpinh1
1.41645e-26	0.635306	1	0.926	2.30867e-22	Kidney2	Fkbp4
1.43473e-26	-0.424587	1	1	2.33847e-22	Kidney2	Rps21
2.09214e-26	0.830268	1	0.995	3.40998e-22	Kidney2	Cd81
2.77104e-26	0.57097	1	1	4.51653e-22	Kidney2	H3f3b
4.04479e-26	-0.634284	0.258	0.873	6.59261e-22	Kidney2	Rhoj
4.19108e-26	-0.590894	0.194	0.874	6.83104e-22	Kidney2	Tfpi
4.28185e-26	0.712406	1	0.985	6.97899e-22	Kidney2	Basp1
4.60511e-26	0.675448	0.871	0.422	7.50587e-22	Kidney2	Sesn3
4.61441e-26	0.478018	0.274	0.022	7.52102e-22	Kidney2	Lcn2
4.62631e-26	0.760075	0.968	0.522	7.54043e-22	Kidney2	Plscr2
4.72629e-26	0.452948	0.952	0.608	7.70338e-22	Kidney2	Grpel2
4.8022e-26	0.541608	1	0.968	7.82711e-22	Kidney2	Tsg101
7.3522e-26	0.625443	1	0.981	1.19833e-21	Kidney2	Rab11a
7.5913e-26	-0.853328	0.839	0.989	1.23731e-21	Kidney2	Lhfp
7.59241e-26	0.370869	0.774	0.248	1.23749e-21	Kidney2	Sema3c
7.59588e-26	-2.15792	0.355	0.877	1.23805e-21	Kidney2	Meg3
7.84223e-26	-0.516022	0.984	1	1.2782e-21	Kidney2	Rpl35a
8.44116e-26	0.474989	0.952	0.651	1.37582e-21	Kidney2	Polb
8.75071e-26	0.66024	0.984	0.691	1.42628e-21	Kidney2	H2-K1
8.93128e-26	-1.07255	0.306	0.881	1.45571e-21	Kidney2	Col8a1
9.4849e-26	-1.14194	0.919	0.992	1.54594e-21	Kidney2	Csf1
1.15929e-25	-0.681519	0.984	0.997	1.88953e-21	Kidney2	Rrbp1
2.46823e-25	0.597247	0.468	0.079	4.02297e-21	Kidney2	Ppbp
3.04584e-25	0.575367	1	0.993	4.96441e-21	Kidney2	Pdlim7
3.10749e-25	0.721987	1	0.881	5.06489e-21	Kidney2	H2-D1
3.31699e-25	0.712246	1	0.754	5.40635e-21	Kidney2	Jag1
3.46474e-25	1.17369	1	0.876	5.64718e-21	Kidney2	Cd24a
4.11527e-25	0.500571	0.903	0.423	6.70748e-21	Kidney2	Cd59a
4.43417e-25	0.445421	0.694	0.21	7.22725e-21	Kidney2	Rrad
4.8969e-25	0.652221	1	0.833	7.98146e-21	Kidney2	Jup
5.06417e-25	-0.556828	0.065	0.8	8.2541e-21	Kidney2	Pdgfrb
5.4044e-25	0.621581	1	0.99	8.80863e-21	Kidney2	Atp6v1f
5.55993e-25	0.696565	0.935	0.491	9.06213e-21	Kidney2	Tmem176a
5.65716e-25	0.494997	1	0.976	9.2206e-21	Kidney2	Pdcd6
5.90303e-25	0.810609	1	0.988	9.62134e-21	Kidney2	Tsc22d1
6.35756e-25	-0.844607	0.629	0.966	1.03622e-20	Kidney2	Fam198b
9.72508e-25	-0.546135	0.565	0.943	1.58509e-20	Kidney2	P3h4
1.03734e-24	-0.456277	0.081	0.804	1.69076e-20	Kidney2	Ddr2
1.04554e-24	0.518644	0.984	0.883	1.70412e-20	Kidney2	Uchl3
1.16278e-24	-0.771441	0.726	0.968	1.89521e-20	Kidney2	Unc5b
1.41585e-24	-0.437922	1	1	2.30769e-20	Kidney2	Rplp2
2.16269e-24	0.370274	0.79	0.295	3.52497e-20	Kidney2	Arhgef28
2.20507e-24	0.942158	1	0.92	3.59404e-20	Kidney2	Cd9
2.25774e-24	-0.747636	0.71	0.975	3.6799e-20	Kidney2	Snhg18
2.34818e-24	0.469744	0.919	0.647	3.8273e-20	Kidney2	Hagh
2.36052e-24	-0.570694	0.613	0.95	3.84742e-20	Kidney2	Copz2
2.51049e-24	-1.6252	0.645	0.961	4.09184e-20	Kidney2	Crip1
2.64974e-24	0.795121	0.968	0.846	4.31881e-20	Kidney2	Bicc1
2.76592e-24	-0.38562	0.21	0.873	4.50818e-20	Kidney2	Zeb2
2.77036e-24	-0.443956	0.097	0.825	4.51541e-20	Kidney2	Cd302
3.56141e-24	0.517291	0.774	0.312	5.80474e-20	Kidney2	F2rl1
3.78556e-24	0.322405	0.79	0.338	6.17009e-20	Kidney2	Sh3yl1
4.14535e-24	-0.595764	1	1	6.75651e-20	Kidney2	Rpsa
4.23807e-24	-0.519377	0.177	0.863	6.90762e-20	Kidney2	Creb3l1
4.28447e-24	-0.465632	1	1	6.98326e-20	Kidney2	Rps23
4.80298e-24	0.261716	0.468	0.083	7.82837e-20	Kidney2	Pdlim4
4.81267e-24	-0.45423	0.145	0.822	7.84416e-20	Kidney2	Arhgap31
5.09141e-24	0.599383	1	0.976	8.29849e-20	Kidney2	Atp6v1e1
6.00558e-24	0.515158	1	0.942	9.78849e-20	Kidney2	Rsrc2
7.59912e-24	-0.623981	0.274	0.869	1.23858e-19	Kidney2	Pmp22
7.79056e-24	0.421816	0.839	0.368	1.26978e-19	Kidney2	Rnf128
8.03906e-24	-0.475108	1	1	1.31029e-19	Kidney2	Rps28
8.09564e-24	-1.38503	0.839	0.979	1.31951e-19	Kidney2	Myl9
9.01403e-24	0.553639	1	0.981	1.4692e-19	Kidney2	Cd151
9.6899e-24	0.545762	0.968	0.879	1.57936e-19	Kidney2	Akap9
1.03107e-23	0.602248	0.919	0.692	1.68054e-19	Kidney2	0610011F06Rik
1.03631e-23	-0.570352	1	1	1.68909e-19	Kidney2	Rpl12
1.05068e-23	0.600682	1	0.946	1.7125e-19	Kidney2	Aplp2
1.11092e-23	0.538238	1	0.998	1.81069e-19	Kidney2	Capns1
1.32964e-23	0.545231	1	0.999	2.16718e-19	Kidney2	Prdx2
1.41493e-23	0.318858	0.855	0.405	2.30619e-19	Kidney2	Nt5c2
1.42513e-23	-0.803335	1	1	2.32282e-19	Kidney2	Fth1
1.48066e-23	-0.43895	0.113	0.792	2.41333e-19	Kidney2	Meis2
1.8671e-23	0.421024	0.919	0.603	3.04318e-19	Kidney2	Rab11fip5
2.08277e-23	0.729956	1	0.731	3.39471e-19	Kidney2	Atp1b1
2.11246e-23	0.623974	1	0.95	3.4431e-19	Kidney2	Hprt
2.3289e-23	0.505717	0.806	0.325	3.79587e-19	Kidney2	Sytl2
2.90504e-23	-0.856588	0.177	0.818	4.73493e-19	Kidney2	Mfap5
2.9584e-23	-0.587515	0.242	0.842	4.8219e-19	Kidney2	Fkbp11
3.30209e-23	-0.711259	0.242	0.853	5.38207e-19	Kidney2	Jam2
3.49455e-23	0.404355	0.871	0.389	5.69576e-19	Kidney2	Chchd10
4.09668e-23	0.752313	0.935	0.754	6.67717e-19	Kidney2	Tuba4a
4.21824e-23	0.458242	1	0.999	6.8753e-19	Kidney2	Atp6v0e
4.70706e-23	0.952152	1	0.969	7.67203e-19	Kidney2	Sox4
5.1076e-23	0.648055	1	0.725	8.32488e-19	Kidney2	Arl4c
5.80928e-23	0.640225	1	0.982	9.46855e-19	Kidney2	Klf6
6.71394e-23	0.938448	0.952	0.747	1.09431e-18	Kidney2	Zfp36l1
7.59211e-23	-0.515875	0.29	0.851	1.23744e-18	Kidney2	Sulf1
7.63527e-23	-0.996908	0.339	0.869	1.24447e-18	Kidney2	Sdpr
8.53688e-23	-0.832558	0.581	0.928	1.39143e-18	Kidney2	Mmd
8.92766e-23	-0.461382	1	0.999	1.45512e-18	Kidney2	Rpl31
9.29239e-23	-0.435469	1	1	1.51457e-18	Kidney2	Rpl36a
1.00265e-22	0.470356	1	0.998	1.63422e-18	Kidney2	Atpif1
1.02174e-22	-0.504786	0.661	0.97	1.66534e-18	Kidney2	Wsb2
1.10363e-22	0.754656	1	0.997	1.79881e-18	Kidney2	Ubb
1.13041e-22	-0.542998	1	1	1.84246e-18	Kidney2	Rps26
1.15509e-22	-0.4525	0.081	0.772	1.88269e-18	Kidney2	Mmp23
1.31796e-22	0.510341	1	0.962	2.14815e-18	Kidney2	Dctn3
1.40226e-22	-0.61665	0.952	0.995	2.28555e-18	Kidney2	Selm
1.57979e-22	0.487654	0.984	0.858	2.5749e-18	Kidney2	Bnip3l
1.68267e-22	0.280161	0.758	0.278	2.74259e-18	Kidney2	Klf5
1.73873e-22	-0.513481	1	1	2.83395e-18	Kidney2	Rps2
1.76661e-22	-0.600446	1	0.996	2.8794e-18	Kidney2	P4hb
2.00716e-22	0.449858	0.968	0.581	3.27147e-18	Kidney2	Fnbp1l
2.32289e-22	0.523501	0.935	0.639	3.78609e-18	Kidney2	Strbp
2.56569e-22	-0.428624	1	1	4.18182e-18	Kidney2	Rpl37a
2.7444e-22	-0.464029	1	1	4.4731e-18	Kidney2	Rps15a
2.74959e-22	-0.697014	0.984	0.988	4.48155e-18	Kidney2	Kdelr2
2.8542e-22	-0.614563	0.839	0.989	4.65206e-18	Kidney2	Efemp2
2.96435e-22	0.503633	0.952	0.891	4.8316e-18	Kidney2	Psme2
3.07204e-22	0.481733	0.984	0.997	5.00711e-18	Kidney2	Tmbim6
3.34051e-22	-0.506391	0.597	0.941	5.4447e-18	Kidney2	Oxct1
3.34064e-22	-0.454654	0.258	0.876	5.44491e-18	Kidney2	Mxra7
3.35559e-22	-0.643001	0.774	0.988	5.46928e-18	Kidney2	Eva1b
3.7481e-22	0.451718	0.984	0.814	6.10904e-18	Kidney2	Tmem63b
3.80197e-22	-0.686789	0.274	0.874	6.19684e-18	Kidney2	Fbln5
4.38627e-22	-0.808463	0.532	0.938	7.14919e-18	Kidney2	Prdx4
4.75084e-22	-1.26518	0.839	0.998	7.74339e-18	Kidney2	Tagln
4.89911e-22	0.471335	0.935	0.604	7.98506e-18	Kidney2	Pnrc1
5.89836e-22	-0.431443	1	1	9.61374e-18	Kidney2	Rps24
5.9673e-22	-0.590038	0.839	0.993	9.72611e-18	Kidney2	Clic4
5.97198e-22	0.516242	0.984	0.923	9.73372e-18	Kidney2	Zfand6
6.08018e-22	-0.66834	0.581	0.941	9.91008e-18	Kidney2	Vgll3
6.53039e-22	0.393717	0.855	0.458	1.06439e-17	Kidney2	Slc31a2
1.02044e-21	0.422799	0.839	0.41	1.66321e-17	Kidney2	Bst2
1.1594e-21	0.460572	1	0.919	1.8897e-17	Kidney2	Prpf19
1.26988e-21	-0.400338	1	0.999	2.06978e-17	Kidney2	Rps25
1.27477e-21	-0.490876	0.935	0.992	2.07775e-17	Kidney2	Mprip
1.33585e-21	-0.369002	1	1	2.1773e-17	Kidney2	Rpl34
1.40221e-21	-0.522785	0.919	0.988	2.28546e-17	Kidney2	Mbnl2
1.42167e-21	-0.39193	0.29	0.876	2.31717e-17	Kidney2	Fam114a1
1.44374e-21	0.547011	1	0.983	2.35315e-17	Kidney2	Cct5
1.67811e-21	-0.506449	0.806	0.978	2.73516e-17	Kidney2	Gm10073
1.82009e-21	-0.487093	0.323	0.873	2.96657e-17	Kidney2	Vcan
1.87339e-21	0.44599	1	0.991	3.05344e-17	Kidney2	Park7
1.90276e-21	-0.467323	1	1	3.1013e-17	Kidney2	Rps20
1.9217e-21	0.475643	0.984	0.912	3.13218e-17	Kidney2	Amotl1
2.05917e-21	0.560487	1	0.945	3.35624e-17	Kidney2	Arl6ip1
2.30089e-21	0.486707	1	0.954	3.75021e-17	Kidney2	Atp6ap1
2.65518e-21	0.436572	0.839	0.447	4.32767e-17	Kidney2	Sh3bp4
2.76996e-21	0.527293	0.919	0.574	4.51475e-17	Kidney2	Gprc5a
3.01462e-21	-0.584563	0.903	0.984	4.91354e-17	Kidney2	Tspan4
3.10914e-21	0.369789	0.887	0.51	5.06759e-17	Kidney2	Stx3
3.15877e-21	0.591186	1	0.999	5.14847e-17	Kidney2	Ubc
3.50542e-21	0.483765	1	1	5.71348e-17	Kidney2	Atp5b
3.7756e-21	0.321892	0.694	0.231	6.15385e-17	Kidney2	Shroom3
3.8747e-21	-0.427562	1	1	6.31538e-17	Kidney2	Rps19
3.99586e-21	0.51887	1	0.994	6.51285e-17	Kidney2	Hn1
4.03139e-21	-0.402137	0.21	0.838	6.57076e-17	Kidney2	Ptprn
4.40908e-21	-0.494439	0.274	0.851	7.18635e-17	Kidney2	Rrm1
4.7135e-21	-0.507725	0.565	0.928	7.68254e-17	Kidney2	Dpysl2
6.18093e-21	-0.333252	0.161	0.822	1.00743e-16	Kidney2	Dse
7.19936e-21	0.639301	0.984	0.984	1.17342e-16	Kidney2	Litaf
8.14383e-21	0.298652	0.935	0.58	1.32736e-16	Kidney2	Armc10
8.30935e-21	-0.946945	0.258	0.822	1.35434e-16	Kidney2	Serpinf1
1.38931e-20	0.457355	1	0.989	2.26444e-16	Kidney2	Ube2b
1.46962e-20	0.463257	0.887	0.602	2.39533e-16	Kidney2	Foxn3
1.47506e-20	0.322727	0.758	0.325	2.4042e-16	Kidney2	Ifitm10
1.59295e-20	0.399545	0.935	0.68	2.59635e-16	Kidney2	Skap2
1.69404e-20	-0.567709	0.919	0.976	2.76112e-16	Kidney2	Dap
1.70217e-20	-0.492535	0.419	0.904	2.77437e-16	Kidney2	Lamc1
1.80981e-20	-0.331381	0.129	0.764	2.94982e-16	Kidney2	Scd1
1.84502e-20	-1.01593	0.323	0.837	3.0072e-16	Kidney2	Cxcl12
1.99702e-20	0.407433	1	0.971	3.25494e-16	Kidney2	Dctn2
2.06771e-20	0.475706	1	0.984	3.37017e-16	Kidney2	Arpc3
2.13226e-20	0.388048	0.774	0.354	3.47538e-16	Kidney2	Fam110a
2.15285e-20	-0.864142	0.629	0.948	3.50893e-16	Kidney2	Itga5
2.35915e-20	-0.629718	0.355	0.871	3.84517e-16	Kidney2	Klf2
2.67374e-20	-0.570533	0.177	0.773	4.35792e-16	Kidney2	Col11a1
2.77453e-20	0.421809	1	0.977	4.5222e-16	Kidney2	Chmp5
2.78617e-20	-0.388016	1	1	4.54118e-16	Kidney2	Rpl13
2.83494e-20	-1.48448	0.581	0.925	4.62067e-16	Kidney2	Rbp1
3.22863e-20	-0.523541	0.726	0.958	5.26234e-16	Kidney2	Nfix
3.24434e-20	-0.593691	0.952	0.986	5.28795e-16	Kidney2	Axl
3.86027e-20	0.849691	0.952	0.808	6.29185e-16	Kidney2	Cdkn2a
4.24376e-20	0.498533	1	0.987	6.91691e-16	Kidney2	Ywhaq
4.27534e-20	-0.448112	0.435	0.928	6.96838e-16	Kidney2	Camk2d
4.52208e-20	-0.391315	0.242	0.815	7.37053e-16	Kidney2	Gpr176
5.10565e-20	-0.503025	0.661	0.955	8.3217e-16	Kidney2	Snx7
5.20602e-20	0.415455	1	0.964	8.48529e-16	Kidney2	Txndc9
5.35815e-20	-0.598165	0.694	0.961	8.73324e-16	Kidney2	Ugdh
5.399e-20	0.358104	0.919	0.646	8.79984e-16	Kidney2	Hacd2
6.01869e-20	-0.394266	0.129	0.746	9.80986e-16	Kidney2	3300005D01Rik
6.18753e-20	0.398339	0.968	0.754	1.00851e-15	Kidney2	Vps72
6.33209e-20	-0.895519	0.161	0.784	1.03207e-15	Kidney2	Postn
6.37946e-20	-0.704279	0.145	0.756	1.03979e-15	Kidney2	Mustn1
6.63527e-20	0.482402	0.984	0.947	1.08148e-15	Kidney2	Uqcrc2
6.87419e-20	-0.417282	1	1	1.12042e-15	Kidney2	Rps8
7.26648e-20	-0.438735	0.677	0.943	1.18436e-15	Kidney2	Pcbp4
7.89719e-20	0.363567	0.871	0.492	1.28716e-15	Kidney2	Ptk2b
8.32006e-20	-0.312325	0.177	0.803	1.35609e-15	Kidney2	Rgs10
8.55007e-20	0.346601	0.855	0.46	1.39358e-15	Kidney2	Clcn3
8.63089e-20	-0.532266	0.806	0.977	1.40675e-15	Kidney2	Ak1
9.35471e-20	-0.35974	0.032	0.69	1.52472e-15	Kidney2	Clmp
9.39747e-20	0.403683	0.952	0.855	1.53169e-15	Kidney2	Dhrs1
9.43155e-20	-0.595054	0.984	0.996	1.53725e-15	Kidney2	Nap1l1
1.0758e-19	-0.258042	0.065	0.722	1.75345e-15	Kidney2	Jam3
1.1448e-19	-0.520168	0.806	0.968	1.86591e-15	Kidney2	Asap1
1.17618e-19	1.38757	0.984	0.907	1.91705e-15	Kidney2	F3
1.30896e-19	0.480283	0.984	0.941	2.13347e-15	Kidney2	Nt5c
1.31582e-19	0.255356	0.726	0.293	2.14465e-15	Kidney2	Eif2ak3
1.38115e-19	0.59173	0.806	0.433	2.25113e-15	Kidney2	Nox4
1.39932e-19	0.493679	0.968	0.822	2.28076e-15	Kidney2	Ajuba
1.40073e-19	0.457776	0.968	0.91	2.28305e-15	Kidney2	Mtx2
1.40527e-19	0.298814	0.823	0.404	2.29046e-15	Kidney2	Cpne8
1.42956e-19	0.382996	0.871	0.41	2.33004e-15	Kidney2	Hoxb8
1.4415e-19	0.497834	0.919	0.747	2.3495e-15	Kidney2	Psme1
1.50771e-19	-0.693182	0.306	0.833	2.45742e-15	Kidney2	Lrrc32
1.52889e-19	-0.534617	0.548	0.899	2.49194e-15	Kidney2	Rnase4
1.63137e-19	0.509525	1	0.996	2.65897e-15	Kidney2	Tmem59
1.68097e-19	0.380326	0.839	0.475	2.73982e-15	Kidney2	Fuca2
1.82205e-19	0.68713	1	0.986	2.96976e-15	Kidney2	Cdkn1a
1.87942e-19	0.473745	0.935	0.774	3.06327e-15	Kidney2	Trappc6a
2.22899e-19	0.348402	0.919	0.643	3.63303e-15	Kidney2	Hsd17b4
2.25069e-19	-0.459838	0.758	0.974	3.6684e-15	Kidney2	Ppp1r18
2.31652e-19	0.395639	0.935	0.688	3.77569e-15	Kidney2	Tmem132a
2.52269e-19	0.348343	0.952	0.76	4.11174e-15	Kidney2	Grcc10
2.57956e-19	-0.488434	0.984	0.995	4.20443e-15	Kidney2	Calu
2.6631e-19	-0.450599	0.258	0.804	4.34058e-15	Kidney2	Hs6st2
2.84681e-19	-0.540426	0.774	0.973	4.64002e-15	Kidney2	Srm
2.8588e-19	-0.548841	0.468	0.884	4.65957e-15	Kidney2	Oaf
2.8777e-19	0.463002	0.871	0.574	4.69037e-15	Kidney2	Hes6
3.19222e-19	0.305233	0.629	0.202	5.20301e-15	Kidney2	Krt20
3.24323e-19	0.448868	0.661	0.216	5.28613e-15	Kidney2	Ucp2
3.32411e-19	0.617636	0.855	0.58	5.41796e-15	Kidney2	Nudt18
3.56712e-19	-0.428261	0.919	0.992	5.81404e-15	Kidney2	Atp1b3
3.58531e-19	-0.498446	0.79	0.972	5.8437e-15	Kidney2	Ghr
3.72853e-19	0.426762	0.903	0.646	6.07712e-15	Kidney2	Hrsp12
4.10042e-19	0.265875	0.613	0.184	6.68328e-15	Kidney2	Akr1c13
4.60597e-19	0.691066	1	1	7.50726e-15	Kidney2	Tpm1
4.66102e-19	0.381218	0.919	0.784	7.597e-15	Kidney2	Stx8
4.86541e-19	-0.513116	0.726	0.957	7.93014e-15	Kidney2	Adam9
5.4723e-19	0.385338	0.79	0.403	8.91931e-15	Kidney2	Baiap2
5.50458e-19	-0.406668	0.177	0.768	8.97191e-15	Kidney2	Bcat1
5.98564e-19	-0.366599	1	1	9.75599e-15	Kidney2	Rps27a
5.98697e-19	0.361968	0.79	0.408	9.75816e-15	Kidney2	Cd82
6.09108e-19	0.346029	0.871	0.513	9.92785e-15	Kidney2	Pacsin3
6.79663e-19	-0.343977	1	1	1.10778e-14	Kidney2	Rpl21
7.94279e-19	-0.343629	1	1	1.2946e-14	Kidney2	Rpl37
8.01057e-19	-0.436391	0.79	0.987	1.30564e-14	Kidney2	Spop
8.01327e-19	0.470029	0.935	0.707	1.30608e-14	Kidney2	Atp11a
9.34313e-19	0.435205	0.919	0.72	1.52284e-14	Kidney2	Mllt4
9.41619e-19	-0.478152	0.21	0.779	1.53474e-14	Kidney2	Loxl3
9.82878e-19	-0.322647	0.048	0.692	1.60199e-14	Kidney2	Pdzrn3
9.83003e-19	0.590019	0.935	0.795	1.6022e-14	Kidney2	Gadd45b
9.9156e-19	-0.323853	0.145	0.731	1.61614e-14	Kidney2	Antxr1
1.04432e-18	-0.523153	0.71	0.94	1.70215e-14	Kidney2	Kdelr3
1.09302e-18	-0.521078	0.274	0.813	1.78152e-14	Kidney2	Fgf2
1.22866e-18	0.620408	1	0.973	2.00259e-14	Kidney2	Psap
1.26608e-18	-0.708709	0.774	0.968	2.06358e-14	Kidney2	Fxyd5
1.34069e-18	0.443996	0.903	0.639	2.18519e-14	Kidney2	Gnpda2
1.46866e-18	0.406783	0.984	0.952	2.39378e-14	Kidney2	Bcas2
1.55045e-18	0.337679	0.984	0.999	2.52708e-14	Kidney2	Tbca
1.57732e-18	0.408422	0.984	0.775	2.57087e-14	Kidney2	Akr7a5
1.65097e-18	0.342755	1	1	2.69091e-14	Kidney2	Cox4i1
1.66627e-18	-0.359615	0.097	0.71	2.71586e-14	Kidney2	Twist2
1.74825e-18	0.437654	1	0.984	2.84947e-14	Kidney2	Srsf5
1.82847e-18	0.367686	0.984	0.941	2.98022e-14	Kidney2	Supt4a
1.98383e-18	0.441579	1	0.97	3.23344e-14	Kidney2	Atxn10
2.06165e-18	-0.319984	1	1	3.36029e-14	Kidney2	Rps15
2.17739e-18	0.422564	0.887	0.647	3.54892e-14	Kidney2	Arhgef5
2.45311e-18	-0.363222	0.097	0.714	3.99832e-14	Kidney2	Snai1
2.48773e-18	0.482638	0.984	0.839	4.05475e-14	Kidney2	Mgat4b
2.62857e-18	-0.351125	1	1	4.28431e-14	Kidney2	Rps16
3.29532e-18	-0.609584	0.581	0.945	5.37104e-14	Kidney2	Dlc1
3.36737e-18	-0.486919	0.887	0.97	5.48847e-14	Kidney2	Apbb2
3.48347e-18	0.38771	0.871	0.58	5.67771e-14	Kidney2	Ehd4
3.50643e-18	0.436789	0.919	0.692	5.71513e-14	Kidney2	Tapbp
3.51979e-18	-0.383745	1	0.999	5.73691e-14	Kidney2	Tpt1
3.87293e-18	0.491023	1	0.979	6.31248e-14	Kidney2	Ndufa6
4.04233e-18	-0.507973	0.952	0.991	6.5886e-14	Kidney2	Rbms1
4.0528e-18	-0.631605	0.194	0.752	6.60566e-14	Kidney2	Tmem45a
4.1455e-18	0.388843	0.758	0.396	6.75675e-14	Kidney2	Tjp2
4.30314e-18	-0.517846	0.823	0.975	7.01368e-14	Kidney2	Tead1
4.81786e-18	-0.403596	0.371	0.879	7.85263e-14	Kidney2	Pcdh7
5.30989e-18	-0.382607	1	1	8.65459e-14	Kidney2	Rpl8
5.30989e-18	-0.791848	1	1	8.65459e-14	Kidney2	S100a6
5.32869e-18	-0.377579	1	1	8.68524e-14	Kidney2	Rpl35
5.44838e-18	-0.308682	0.306	0.858	8.88031e-14	Kidney2	Armcx2
5.61217e-18	0.389348	0.968	0.921	9.14728e-14	Kidney2	Rab22a
6.74233e-18	0.392388	0.935	0.808	1.09893e-13	Kidney2	Fam173a
7.38971e-18	0.441271	0.903	0.747	1.20445e-13	Kidney2	Ifngr1
7.55545e-18	-0.303767	0.097	0.722	1.23146e-13	Kidney2	Ripk3
7.62236e-18	-0.49663	1	1	1.24237e-13	Kidney2	Arpc1b
7.87108e-18	0.402548	0.935	0.731	1.28291e-13	Kidney2	Atg101
9.29617e-18	0.426294	0.968	0.906	1.51518e-13	Kidney2	Ndfip2
1.09617e-17	-0.621402	0.968	0.995	1.78665e-13	Kidney2	Zyx
1.1504e-17	-0.683753	0.258	0.768	1.87504e-13	Kidney2	Eng
1.19619e-17	0.338565	0.903	0.66	1.94967e-13	Kidney2	Ten1
1.22058e-17	-0.453766	0.629	0.941	1.98943e-13	Kidney2	Golim4
1.24175e-17	-0.309793	0.113	0.706	2.02393e-13	Kidney2	Twist1
1.31736e-17	0.315533	0.855	0.497	2.14717e-13	Kidney2	Pnpla2
1.43497e-17	-1.19289	0.823	0.956	2.33885e-13	Kidney2	Ptgs2
1.438e-17	-0.495918	0.677	0.955	2.34379e-13	Kidney2	Fgfr1
1.5677e-17	-0.448864	0.129	0.707	2.5552e-13	Kidney2	Nt5dc2
1.57197e-17	0.530226	0.855	0.566	2.56215e-13	Kidney2	Mgst3
1.7301e-17	0.393572	0.871	0.6	2.81989e-13	Kidney2	Fbxw9
1.73706e-17	-0.352458	0.355	0.873	2.83123e-13	Kidney2	Sh3pxd2a
1.80556e-17	-0.311801	0.129	0.738	2.94289e-13	Kidney2	Gstm2
1.8692e-17	-0.556875	0.129	0.715	3.04662e-13	Kidney2	Thbs2
2.12844e-17	-0.367516	0.145	0.731	3.46914e-13	Kidney2	Slc29a1
2.13931e-17	0.421878	0.79	0.519	3.48687e-13	Kidney2	Hsdl2
2.15564e-17	0.464975	0.952	0.829	3.51348e-13	Kidney2	Smtn
2.24091e-17	0.343487	0.968	0.814	3.65246e-13	Kidney2	Actl6a
2.27385e-17	0.330977	0.952	0.754	3.70615e-13	Kidney2	Tm2d3
2.43141e-17	0.500679	1	0.955	3.96296e-13	Kidney2	Rsrp1
2.47774e-17	0.340596	0.968	0.847	4.03846e-13	Kidney2	Qars
2.63901e-17	0.376909	0.952	0.858	4.30132e-13	Kidney2	Ift43
2.67632e-17	-0.254318	0.161	0.753	4.36214e-13	Kidney2	Arhgef25
2.92419e-17	0.450434	1	0.993	4.76614e-13	Kidney2	Hsp90aa1
2.96243e-17	-0.650046	0.903	0.975	4.82847e-13	Kidney2	F2r
3.06361e-17	0.369928	0.968	0.872	4.99338e-13	Kidney2	Vps4b
3.10113e-17	-1.02042	1	0.999	5.05454e-13	Kidney2	Acta2
3.18818e-17	-0.341168	0.774	0.965	5.19641e-13	Kidney2	Rbfox2
3.30786e-17	-0.306423	0.242	0.798	5.39147e-13	Kidney2	Gnb4
3.47473e-17	0.899777	0.919	0.703	5.66347e-13	Kidney2	Ccnd1
3.487e-17	0.378501	1	0.987	5.68345e-13	Kidney2	Ctnna1
3.56833e-17	-0.322732	0.435	0.865	5.81602e-13	Kidney2	Kank2
3.72431e-17	-0.291859	0.258	0.788	6.07026e-13	Kidney2	Itsn1
3.76671e-17	0.387238	0.935	0.821	6.13935e-13	Kidney2	Ube2d1
3.82114e-17	0.372009	0.71	0.314	6.22807e-13	Kidney2	Epha4
3.88928e-17	0.36863	0.823	0.541	6.33914e-13	Kidney2	Ing4
4.12811e-17	-0.293574	0.097	0.703	6.72841e-13	Kidney2	Mrc2
4.19484e-17	0.330737	0.952	0.773	6.83718e-13	Kidney2	Glod4
4.55782e-17	-0.780016	0.645	0.942	7.42879e-13	Kidney2	Fhl1
4.59034e-17	0.512205	0.952	0.869	7.48179e-13	Kidney2	Phf3
4.64669e-17	0.336782	0.871	0.607	7.57365e-13	Kidney2	Asl
4.65483e-17	0.346005	0.855	0.557	7.58691e-13	Kidney2	Casp6
5.31718e-17	0.457484	0.919	0.814	8.66647e-13	Kidney2	Gsr
5.41515e-17	0.652893	0.952	0.788	8.82615e-13	Kidney2	Enah
5.64253e-17	-0.354258	1	1	9.19675e-13	Kidney2	Arhgdia
5.70527e-17	-0.306634	0.081	0.683	9.29902e-13	Kidney2	Nsg1
5.80268e-17	0.48943	0.952	0.617	9.45779e-13	Kidney2	Nrep
5.98078e-17	-0.349736	1	1	9.74808e-13	Kidney2	Rpl18a
6.08402e-17	-0.33884	1	1	9.91635e-13	Kidney2	Rps27
6.16807e-17	0.252979	0.726	0.331	1.00533e-12	Kidney2	Rogdi
6.52629e-17	-0.418099	0.71	0.943	1.06372e-12	Kidney2	Oat
6.99154e-17	-0.334947	0.274	0.774	1.13955e-12	Kidney2	Ripk2
7.00189e-17	-0.45497	0.161	0.741	1.14124e-12	Kidney2	Emilin1
7.05886e-17	0.37437	0.984	0.952	1.15052e-12	Kidney2	Med21
7.52896e-17	0.27261	0.694	0.282	1.22715e-12	Kidney2	Eva1a
7.6203e-17	0.4239	0.806	0.429	1.24203e-12	Kidney2	Ccng2
7.83414e-17	0.375227	1	0.999	1.27689e-12	Kidney2	Psma7
7.92754e-17	-0.264688	0.113	0.709	1.29211e-12	Kidney2	Clip3
8.13321e-17	-0.455556	0.887	0.995	1.32563e-12	Kidney2	Ssr1
8.65301e-17	-0.308825	0	0.602	1.41035e-12	Kidney2	Lpar1
9.69485e-17	-0.532602	0.774	0.958	1.58016e-12	Kidney2	Mical2
9.91009e-17	-0.444639	0.516	0.908	1.61525e-12	Kidney2	Fkbp7
1.04452e-16	0.366538	0.887	0.641	1.70246e-12	Kidney2	Trip10
1.13807e-16	0.293545	0.677	0.293	1.85494e-12	Kidney2	Dusp8
1.15258e-16	-0.351058	0.048	0.647	1.8786e-12	Kidney2	Ereg
1.18623e-16	0.398012	1	0.991	1.93344e-12	Kidney2	Ssu72
1.21282e-16	0.490115	0.952	0.891	1.97677e-12	Kidney2	Arl2
1.23773e-16	0.399198	0.984	0.921	2.01737e-12	Kidney2	Trappc3
1.49076e-16	0.333147	0.887	0.418	2.42979e-12	Kidney2	Sox11
1.77285e-16	0.561314	1	0.928	2.88958e-12	Kidney2	Sdc4
1.83387e-16	-0.436155	0.855	0.983	2.98902e-12	Kidney2	Dst
1.93725e-16	0.39001	0.968	0.901	3.15753e-12	Kidney2	Chmp2b
1.97081e-16	-0.41765	0.677	0.937	3.21223e-12	Kidney2	Peak1
2.05833e-16	0.288563	0.968	0.823	3.35487e-12	Kidney2	Carkd
2.16777e-16	0.481033	0.968	0.817	3.53325e-12	Kidney2	Ctxn1
2.18883e-16	0.364693	0.952	0.839	3.56758e-12	Kidney2	Nae1
2.372e-16	-0.328807	0.226	0.761	3.86612e-12	Kidney2	Cd109
2.54653e-16	0.346968	1	0.992	4.15059e-12	Kidney2	Dync1i2
2.629e-16	0.504459	1	0.997	4.28501e-12	Kidney2	Itgb1
2.73465e-16	0.308127	1	0.956	4.4572e-12	Kidney2	Cers2
2.79364e-16	-0.651351	0.161	0.711	4.55336e-12	Kidney2	Igfbp6
2.83016e-16	-0.336872	1	0.997	4.61288e-12	Kidney2	Oaz1
2.94373e-16	0.419088	0.726	0.361	4.79798e-12	Kidney2	Akr1b3
3.04208e-16	-0.860803	0.597	0.902	4.95828e-12	Kidney2	Pdlim2
3.1006e-16	-0.572418	0.371	0.805	5.05368e-12	Kidney2	Pcolce2
3.40325e-16	0.277807	0.694	0.303	5.54695e-12	Kidney2	Mfsd6
3.5054e-16	-0.296874	0.048	0.628	5.71346e-12	Kidney2	Tbx18
3.52068e-16	-0.50294	0.484	0.856	5.73835e-12	Kidney2	Ahnak2
3.91371e-16	-0.348997	1	1	6.37895e-12	Kidney2	Rpl29
4.32503e-16	0.37871	1	0.992	7.04937e-12	Kidney2	Ndufs6
4.34962e-16	-0.291141	0.032	0.612	7.08944e-12	Kidney2	Gata6
4.44191e-16	0.275407	0.871	0.561	7.23987e-12	Kidney2	Stau2
4.63409e-16	0.387414	0.839	0.539	7.5531e-12	Kidney2	Ptprf
4.81089e-16	-0.333032	1	0.998	7.84127e-12	Kidney2	Wdr89
4.85752e-16	-0.32416	0.387	0.829	7.91727e-12	Kidney2	Cmc2
4.92964e-16	0.384076	1	0.932	8.03482e-12	Kidney2	Psmd12
5.09173e-16	0.365612	0.984	0.89	8.29901e-12	Kidney2	Adh5
5.33256e-16	-0.571212	0.935	0.995	8.69155e-12	Kidney2	Ybx3
5.43457e-16	0.381236	0.887	0.71	8.85781e-12	Kidney2	Pgpep1
5.56689e-16	-0.276271	0.129	0.7	9.07347e-12	Kidney2	Apbb1ip
5.83074e-16	0.359151	0.935	0.806	9.50353e-12	Kidney2	Pigt
5.94867e-16	0.636497	0.984	0.944	9.69574e-12	Kidney2	Plk2
6.05402e-16	0.377315	1	0.956	9.86745e-12	Kidney2	Trp53
6.14946e-16	-0.441759	0.355	0.827	1.0023e-11	Kidney2	Blvrb
6.20961e-16	0.307633	0.919	0.702	1.0121e-11	Kidney2	Plekhb2
6.46024e-16	-0.446799	0.048	0.624	1.05295e-11	Kidney2	Fam111a
6.48435e-16	0.365324	1	1	1.05688e-11	Kidney2	Clic1
6.65047e-16	-0.259748	0.258	0.8	1.08396e-11	Kidney2	Acyp2
6.70246e-16	0.380742	1	0.994	1.09243e-11	Kidney2	Arf5
6.79995e-16	0.569786	0.984	0.925	1.10832e-11	Kidney2	1110008P14Rik
6.80615e-16	0.310021	0.823	0.527	1.10933e-11	Kidney2	Shb
7.04289e-16	0.404204	0.855	0.572	1.14792e-11	Kidney2	Chka
8.23583e-16	0.318281	0.887	0.65	1.34236e-11	Kidney2	Med31
8.50144e-16	-0.327519	1	1	1.38565e-11	Kidney2	Rplp0
8.79112e-16	0.324237	0.935	0.829	1.43286e-11	Kidney2	Rnf5
9.28798e-16	-0.457685	0.871	0.982	1.51385e-11	Kidney2	Mbnl1
9.48629e-16	-0.35997	0.548	0.929	1.54617e-11	Kidney2	P4ha1
9.5654e-16	-0.686612	0.226	0.732	1.55907e-11	Kidney2	Tubb3
9.66708e-16	0.28803	0.516	0.163	1.57564e-11	Kidney2	Msx2
9.79531e-16	0.272618	0.839	0.555	1.59654e-11	Kidney2	Plekhf2
1.02767e-15	-0.650937	0.387	0.852	1.675e-11	Kidney2	Cyp1b1
1.04285e-15	-0.334988	0.484	0.868	1.69973e-11	Kidney2	Man2a1
1.08442e-15	0.369181	0.968	0.987	1.7675e-11	Kidney2	Dnaja2
1.4478e-15	0.315826	0.935	0.779	2.35976e-11	Kidney2	Pigx
1.54482e-15	-0.410702	0.968	0.992	2.51791e-11	Kidney2	Hdlbp
1.55288e-15	0.389933	1	0.963	2.53103e-11	Kidney2	Sin3b
1.59061e-15	0.407803	0.984	0.981	2.59254e-11	Kidney2	Psmb5
1.7036e-15	0.343861	1	0.983	2.77669e-11	Kidney2	Ghitm
1.98716e-15	-0.271351	0.371	0.85	3.23888e-11	Kidney2	Syde1
2.06026e-15	0.403729	0.984	0.973	3.35803e-11	Kidney2	Lamtor2
2.06163e-15	0.297134	0.984	0.911	3.36024e-11	Kidney2	Ccdc107
2.14773e-15	-0.673148	0.145	0.659	3.50058e-11	Kidney2	Thy1
2.26031e-15	-0.33243	0.306	0.786	3.68408e-11	Kidney2	Fosl1
2.8472e-15	0.362056	1	0.897	4.64065e-11	Kidney2	Traf4
2.97849e-15	0.392824	0.984	0.981	4.85464e-11	Kidney2	Tmem160
3.04732e-15	0.316549	1	1	4.96683e-11	Kidney2	Arf1
3.07702e-15	0.387217	1	1	5.01524e-11	Kidney2	Eif1
3.12204e-15	-0.66578	0.887	0.997	5.08862e-11	Kidney2	Ccnd2
3.40125e-15	-1.85836	0.742	0.953	5.54369e-11	Kidney2	Mgp
3.66491e-15	-0.310785	0.435	0.87	5.97344e-11	Kidney2	Chsy1
4.04786e-15	-0.413574	0.952	0.995	6.5976e-11	Kidney2	Lrrc59
4.05918e-15	-0.390705	0.919	0.979	6.61606e-11	Kidney2	Cdk2ap1
4.07515e-15	0.352669	0.984	0.953	6.64209e-11	Kidney2	Pet100
4.15427e-15	0.460383	0.968	0.899	6.77104e-11	Kidney2	Ralb
4.16688e-15	-0.319425	1	1	6.7916e-11	Kidney2	Rpl18
4.17107e-15	0.448316	0.919	0.702	6.79843e-11	Kidney2	Hist3h2a
4.56636e-15	-0.557659	0.065	0.607	7.44271e-11	Kidney2	Fgf7
4.71794e-15	-0.270393	0.129	0.663	7.68977e-11	Kidney2	Foxc2
4.95654e-15	0.350139	1	0.997	8.07866e-11	Kidney2	Clta
4.98846e-15	-0.306497	1	1	8.13069e-11	Kidney2	Rpl13a
5.06837e-15	0.376691	1	0.982	8.26093e-11	Kidney2	Rab18
5.36528e-15	0.402357	0.968	0.969	8.74487e-11	Kidney2	Eif3m
5.5009e-15	-0.420572	0.968	0.993	8.96592e-11	Kidney2	Sptbn1
5.87522e-15	-0.410026	0.645	0.922	9.57603e-11	Kidney2	Creb3l2
5.88263e-15	0.377725	0.984	0.982	9.5881e-11	Kidney2	Med28
5.93921e-15	-0.4742	0.806	0.948	9.68032e-11	Kidney2	Glipr2
6.39391e-15	-0.352562	1	1	1.04214e-10	Kidney2	Sh3glb1
6.54621e-15	-0.885492	0.758	0.912	1.06697e-10	Kidney2	Vamp5
6.60877e-15	0.364057	0.871	0.624	1.07716e-10	Kidney2	Pkp2
6.6316e-15	0.324671	1	0.949	1.08088e-10	Kidney2	Stx7
6.76488e-15	-0.35958	0.726	0.95	1.10261e-10	Kidney2	Nfic
7.68071e-15	0.355473	0.952	0.772	1.25188e-10	Kidney2	Cirbp
8.71885e-15	0.397975	0.839	0.543	1.42109e-10	Kidney2	Emx2
9.02163e-15	-0.64536	0.952	0.993	1.47043e-10	Kidney2	Fbln2
9.18125e-15	-0.83422	0.758	0.939	1.49645e-10	Kidney2	Lbh
9.44933e-15	0.272997	0.903	0.704	1.54015e-10	Kidney2	Scamp2
9.72481e-15	-0.439394	0.355	0.805	1.58505e-10	Kidney2	Pcdh19
1.00348e-14	0.840169	1	0.999	1.63558e-10	Kidney2	Wbp5
1.0098e-14	0.4243	0.774	0.446	1.64587e-10	Kidney2	Trp53inp1
1.0172e-14	0.384091	0.935	0.834	1.65793e-10	Kidney2	Anxa4
1.05438e-14	-0.254437	0.29	0.773	1.71854e-10	Kidney2	Cdr2l
1.10252e-14	0.362947	0.968	0.921	1.797e-10	Kidney2	Fam32a
1.13732e-14	-0.332266	0.081	0.621	1.85371e-10	Kidney2	Jph2
1.17114e-14	0.314106	0.871	0.69	1.90884e-10	Kidney2	Nfkbib
1.1797e-14	0.398032	0.871	0.663	1.9228e-10	Kidney2	Adam12
1.19081e-14	-0.33837	1	0.996	1.9409e-10	Kidney2	Mrpl52
1.22014e-14	0.315865	0.952	0.858	1.98871e-10	Kidney2	Fcf1
1.41245e-14	0.341776	1	0.997	2.30215e-10	Kidney2	Cox5a
1.46696e-14	0.304519	1	0.997	2.391e-10	Kidney2	Atp5h
1.50356e-14	0.407222	1	0.947	2.45065e-10	Kidney2	Wdr61
1.52098e-14	0.370789	0.984	0.772	2.47904e-10	Kidney2	Sdc1
1.54529e-14	0.324986	0.984	0.993	2.51867e-10	Kidney2	Cdc37
1.55572e-14	-0.253888	0.194	0.74	2.53567e-10	Kidney2	Tram2
1.63429e-14	-0.468171	0.306	0.742	2.66374e-10	Kidney2	Tnfrsf11b
1.6846e-14	-0.547434	0.145	0.646	2.74572e-10	Kidney2	Srpx2
1.6927e-14	-0.29695	0.403	0.861	2.75893e-10	Kidney2	P3h1
1.69774e-14	-0.376143	0.403	0.82	2.76714e-10	Kidney2	Pla2g4a
1.80071e-14	-0.628541	0.677	0.934	2.93497e-10	Kidney2	Ngf
1.8026e-14	0.340785	0.806	0.492	2.93806e-10	Kidney2	Isyna1
1.8824e-14	0.71637	0.968	0.903	3.06812e-10	Kidney2	2200002D01Rik
1.94886e-14	0.307089	0.79	0.444	3.17645e-10	Kidney2	Hoxb7
1.97804e-14	0.402558	1	0.987	3.224e-10	Kidney2	2700060E02Rik
1.98109e-14	0.378994	1	0.985	3.22898e-10	Kidney2	Atxn7l3b
2.04049e-14	0.390302	0.919	0.836	3.3258e-10	Kidney2	Brix1
2.04764e-14	-0.311469	1	1	3.33744e-10	Kidney2	Rpl36
2.27421e-14	0.352886	0.952	0.875	3.70673e-10	Kidney2	Kctd5
2.28068e-14	-0.561455	0.194	0.667	3.71728e-10	Kidney2	Galnt18
2.40243e-14	0.399151	1	0.991	3.91571e-10	Kidney2	Cct4
2.48557e-14	-0.509508	0.887	0.981	4.05123e-10	Kidney2	Myadm
2.54176e-14	0.425402	0.919	0.792	4.14282e-10	Kidney2	Efnb1
2.69781e-14	0.506734	0.887	0.727	4.39717e-10	Kidney2	Ebpl
2.75425e-14	0.389338	1	0.967	4.48916e-10	Kidney2	Sars
2.76103e-14	-0.324037	0.984	0.997	4.5002e-10	Kidney2	Prelid1
2.97407e-14	0.384158	0.984	0.973	4.84744e-10	Kidney2	Chmp2a
3.03392e-14	-0.455322	0.29	0.738	4.94499e-10	Kidney2	Siglecg
3.27499e-14	0.364503	1	0.94	5.33791e-10	Kidney2	Rraga
3.30452e-14	0.407956	0.984	0.965	5.38604e-10	Kidney2	Ktn1
3.34453e-14	0.322209	1	1	5.45125e-10	Kidney2	Hsp90ab1
3.37588e-14	-0.370052	0.968	0.995	5.50234e-10	Kidney2	Surf4
3.38412e-14	-0.346913	0.903	0.975	5.51578e-10	Kidney2	Atp2a2
3.54376e-14	0.525006	0.984	0.873	5.77598e-10	Kidney2	S100a1
3.7829e-14	-0.484993	0.532	0.911	6.16574e-10	Kidney2	Ifi27
3.78439e-14	-0.974208	0.774	0.981	6.16818e-10	Kidney2	Timp3
3.95224e-14	-0.413431	0.855	0.975	6.44176e-10	Kidney2	Foxp1
3.96482e-14	0.351576	1	0.968	6.46226e-10	Kidney2	Eif3l
4.22132e-14	0.336435	1	0.981	6.88033e-10	Kidney2	Psmd4
4.23598e-14	0.29953	0.984	0.944	6.90423e-10	Kidney2	Mrpl43
4.34894e-14	0.276323	0.871	0.589	7.08834e-10	Kidney2	Rnaseh2b
4.45162e-14	-0.323145	0.5	0.888	7.25569e-10	Kidney2	Tmem263
4.53579e-14	0.328698	0.903	0.736	7.39288e-10	Kidney2	Hmox2
4.7932e-14	0.32722	0.742	0.411	7.81244e-10	Kidney2	Myo6
4.91734e-14	0.290787	0.806	0.507	8.01478e-10	Kidney2	Tpd52l1
5.00378e-14	-0.512651	0.887	0.981	8.15566e-10	Kidney2	S100a13
5.21423e-14	0.341883	0.919	0.809	8.49867e-10	Kidney2	Zfp622
5.55874e-14	0.374612	1	0.978	9.0602e-10	Kidney2	Ubxn1
5.97164e-14	0.270498	0.968	0.878	9.73318e-10	Kidney2	Ide
5.99655e-14	-0.28998	1	1	9.77377e-10	Kidney2	Rps13
6.06157e-14	0.932059	1	0.996	9.87976e-10	Kidney2	Ngfrap1
6.23961e-14	0.348877	0.968	0.839	1.01699e-09	Kidney2	Blcap
6.31233e-14	0.463529	0.935	0.705	1.02885e-09	Kidney2	Clcn5
6.35095e-14	-0.347322	0.806	0.975	1.03514e-09	Kidney2	Fkbp9
6.65547e-14	0.341876	0.935	0.92	1.08477e-09	Kidney2	Gabarapl2
6.66872e-14	-0.293051	1	1	1.08693e-09	Kidney2	Rpl28
6.78225e-14	-0.360487	0.613	0.918	1.10544e-09	Kidney2	Ehbp1l1
6.88758e-14	0.308259	0.984	0.995	1.12261e-09	Kidney2	Tomm22
7.02904e-14	0.363856	0.871	0.607	1.14566e-09	Kidney2	Bbc3
7.3581e-14	-0.312636	1	1	1.1993e-09	Kidney2	Rps10
7.42357e-14	0.31985	1	0.975	1.20997e-09	Kidney2	Ndufs4
7.55445e-14	0.297818	1	0.951	1.2313e-09	Kidney2	Ap2b1
7.69746e-14	-0.506763	0.194	0.688	1.25461e-09	Kidney2	Mmp2
7.94023e-14	0.384251	1	0.971	1.29418e-09	Kidney2	Psma6
9.49294e-14	0.323365	0.871	0.673	1.54725e-09	Kidney2	Ppil2
9.53373e-14	-0.534337	0.306	0.751	1.5539e-09	Kidney2	Flrt2
9.63578e-14	0.321449	0.984	0.998	1.57054e-09	Kidney2	Eif5b
1.02688e-13	0.324941	0.694	0.342	1.67371e-09	Kidney2	Tnfaip8
1.10013e-13	-0.45095	0.677	0.935	1.7931e-09	Kidney2	Sgk1
1.11523e-13	0.253807	0.774	0.531	1.81772e-09	Kidney2	Zdhhc13
1.12564e-13	-0.269655	0.226	0.722	1.83467e-09	Kidney2	Tmem47
1.14696e-13	-0.435657	0.226	0.703	1.86943e-09	Kidney2	Nqo1
1.15686e-13	0.263034	0.79	0.499	1.88557e-09	Kidney2	B4galt3
1.17312e-13	0.322181	0.71	0.401	1.91206e-09	Kidney2	Nudt22
1.27749e-13	-0.435286	0.952	0.985	2.08218e-09	Kidney2	Txndc5
1.32739e-13	0.317834	0.919	0.815	2.16352e-09	Kidney2	Smu1
1.33934e-13	-0.291951	1	1	2.18299e-09	Kidney2	Rpl30
1.44284e-13	0.255366	1	1	2.35169e-09	Kidney2	Ubl5
1.48506e-13	0.308046	1	0.999	2.42049e-09	Kidney2	Vamp8
1.48767e-13	0.311953	0.871	0.701	2.42476e-09	Kidney2	Trim16
1.49372e-13	0.282218	1	0.926	2.43461e-09	Kidney2	Chmp1a
1.50511e-13	0.351253	0.968	0.95	2.45317e-09	Kidney2	Dlgap4
1.52056e-13	-0.387078	0.823	0.98	2.47836e-09	Kidney2	Ppfibp1
1.54233e-13	0.332382	1	0.985	2.51384e-09	Kidney2	Txnl1
1.56365e-13	0.490928	1	1	2.54859e-09	Kidney2	Igfbp7
1.56969e-13	-0.325682	0.403	0.871	2.55844e-09	Kidney2	Fstl3
1.64668e-13	0.331264	1	0.878	2.68393e-09	Kidney2	Phax
1.69243e-13	0.405984	0.935	0.907	2.75849e-09	Kidney2	Zak
1.73328e-13	-0.615278	1	1	2.82508e-09	Kidney2	B2m
1.74922e-13	0.398019	0.952	0.812	2.85106e-09	Kidney2	Rbpms
1.78654e-13	-0.294451	0.194	0.719	2.91189e-09	Kidney2	Slit2
1.83836e-13	0.336904	0.887	0.73	2.99634e-09	Kidney2	Acads
1.85276e-13	0.306295	1	0.95	3.01981e-09	Kidney2	Pttg1ip
1.87672e-13	-0.304203	0.887	0.976	3.05887e-09	Kidney2	Nus1
1.88646e-13	0.292418	1	0.999	3.07473e-09	Kidney2	Arpp19
2.00645e-13	0.303726	0.952	0.91	3.27032e-09	Kidney2	Stk25
2.04704e-13	0.338079	0.903	0.831	3.33648e-09	Kidney2	Wbp2
2.08309e-13	-0.327659	0.613	0.909	3.39523e-09	Kidney2	Map6
2.12442e-13	-0.35161	0.21	0.682	3.4626e-09	Kidney2	Cd248
2.14749e-13	0.353894	0.935	0.585	3.50019e-09	Kidney2	Gjb3
2.19966e-13	-0.287425	0.613	0.905	3.58523e-09	Kidney2	Eid1
2.22368e-13	-0.419706	0.984	0.996	3.62438e-09	Kidney2	Snhg6
2.24312e-13	0.47065	0.968	0.857	3.65606e-09	Kidney2	Ier2
2.2471e-13	-0.351812	0.371	0.79	3.66255e-09	Kidney2	Vegfa
2.36171e-13	-0.31974	0.984	0.992	3.84934e-09	Kidney2	Rpl27a
2.39624e-13	0.318464	0.726	0.413	3.90563e-09	Kidney2	Bckdha
2.44536e-13	0.340215	0.984	0.928	3.98569e-09	Kidney2	Shisa4
2.45583e-13	0.301867	0.919	0.826	4.00275e-09	Kidney2	Tsta3
2.50573e-13	0.3443	0.968	0.906	4.08409e-09	Kidney2	Coro1b
2.51725e-13	0.271535	0.742	0.381	4.10287e-09	Kidney2	Arap2
2.63971e-13	-0.309564	1	0.996	4.30246e-09	Kidney2	Tmem167
2.67059e-13	0.38323	1	0.947	4.35279e-09	Kidney2	Tprgl
2.72411e-13	-0.343749	0.968	0.988	4.44003e-09	Kidney2	Mlec
3.02322e-13	0.337022	0.903	0.771	4.92754e-09	Kidney2	Ech1
3.18379e-13	0.308158	0.952	0.919	5.18926e-09	Kidney2	Syf2
3.23193e-13	-0.373991	0.984	0.992	5.26772e-09	Kidney2	Tomm5
3.27845e-13	0.366623	0.984	0.97	5.34355e-09	Kidney2	Itm2c
3.4569e-13	0.271294	0.984	0.99	5.63441e-09	Kidney2	Ndufc2
3.79812e-13	-0.280463	1	1	6.19056e-09	Kidney2	Rps18
3.88696e-13	-0.296469	0.516	0.881	6.33535e-09	Kidney2	Frmd4a
4.08899e-13	0.280117	0.758	0.454	6.66465e-09	Kidney2	Lpcat4
4.34254e-13	-0.637166	0.903	0.985	7.0779e-09	Kidney2	Akap12
4.7066e-13	0.265833	1	0.989	7.67128e-09	Kidney2	Rab10
4.85224e-13	0.26348	0.839	0.636	7.90867e-09	Kidney2	Xpa
4.9202e-13	-0.315276	0.468	0.9	8.01943e-09	Kidney2	Cmtm3
4.95358e-13	0.279167	0.935	0.78	8.07384e-09	Kidney2	Gtf2b
5.0477e-13	-0.264909	0.226	0.724	8.22724e-09	Kidney2	Chst11
5.07234e-13	0.263922	0.71	0.38	8.26741e-09	Kidney2	Efna4
5.27172e-13	0.306464	0.919	0.837	8.59237e-09	Kidney2	Tmed4
5.58595e-13	-0.314602	0.194	0.665	9.10454e-09	Kidney2	Heg1
5.61382e-13	0.360777	1	0.902	9.14996e-09	Kidney2	Glmp
5.93163e-13	0.329131	0.984	0.983	9.66796e-09	Kidney2	Bcap31
6.02253e-13	-0.340056	0.565	0.914	9.81612e-09	Kidney2	Flnc
6.02604e-13	0.304416	0.952	0.767	9.82184e-09	Kidney2	Acadvl
6.46301e-13	0.328475	1	0.982	1.05341e-08	Kidney2	Uqcrc1
6.60395e-13	-0.433831	0.468	0.93	1.07638e-08	Kidney2	Mxra8
7.17411e-13	-0.290534	0.548	0.893	1.16931e-08	Kidney2	Nr3c1
7.29311e-13	-0.316895	0.452	0.849	1.1887e-08	Kidney2	Arl5a
7.29736e-13	0.487751	0.935	0.787	1.1894e-08	Kidney2	Ypel3
7.40646e-13	0.287115	1	0.903	1.20718e-08	Kidney2	Fam103a1
7.42574e-13	0.346054	0.919	0.844	1.21032e-08	Kidney2	Hint2
7.65073e-13	0.264108	0.661	0.336	1.24699e-08	Kidney2	Ddhd1
7.66261e-13	0.261775	0.839	0.525	1.24893e-08	Kidney2	Gm2a
8.41888e-13	-0.270773	0.532	0.907	1.37219e-08	Kidney2	Crtap
8.7454e-13	0.292352	0.468	0.168	1.42541e-08	Kidney2	Apobec3
8.83261e-13	0.585991	1	0.978	1.43963e-08	Kidney2	Sqstm1
9.07002e-13	0.44663	1	0.981	1.47832e-08	Kidney2	Pdcl3
9.77401e-13	0.33019	0.984	0.923	1.59307e-08	Kidney2	Atp6v1c1
9.97109e-13	0.295371	0.935	0.875	1.62519e-08	Kidney2	Ndufa9
1.02011e-12	-0.386244	0.968	0.994	1.66268e-08	Kidney2	Myo1c
1.05785e-12	0.379222	0.887	0.737	1.72419e-08	Kidney2	Epha2
1.11471e-12	0.352064	0.952	0.885	1.81686e-08	Kidney2	Syngr2
1.15661e-12	-0.254716	0.274	0.749	1.88517e-08	Kidney2	Nab2
1.17176e-12	0.346684	1	0.899	1.90986e-08	Kidney2	Mat2b
1.19998e-12	0.250952	0.79	0.473	1.95584e-08	Kidney2	Agap1
1.24388e-12	0.318781	0.919	0.857	2.0274e-08	Kidney2	Idh3g
1.24974e-12	0.335431	0.984	0.919	2.03695e-08	Kidney2	Mrpl21
1.25563e-12	0.352981	1	0.995	2.04655e-08	Kidney2	Eif6
1.26297e-12	-0.750956	0.968	0.992	2.05851e-08	Kidney2	Tuba1b
1.37049e-12	-0.63138	1	1	2.23376e-08	Kidney2	Serpine1
1.40869e-12	0.270852	1	0.958	2.29602e-08	Kidney2	Rrp1
1.41842e-12	0.470844	1	0.97	2.31189e-08	Kidney2	Marcksl1
1.47327e-12	0.344193	0.806	0.508	2.40129e-08	Kidney2	Ctla2b
1.49e-12	0.298014	0.839	0.582	2.42856e-08	Kidney2	Tob1
1.53308e-12	0.382468	1	0.909	2.49877e-08	Kidney2	Tes
1.58568e-12	-0.87997	0.177	0.63	2.5845e-08	Kidney2	Wisp2
1.63709e-12	-0.310927	0.661	0.942	2.66828e-08	Kidney2	Ikbip
1.65936e-12	0.353207	0.871	0.686	2.7046e-08	Kidney2	Nabp1
1.68008e-12	0.313552	1	0.998	2.73836e-08	Kidney2	Eif3h
1.70253e-12	0.318229	1	0.961	2.77496e-08	Kidney2	Psmc4
1.78566e-12	-0.255746	1	1	2.91045e-08	Kidney2	Rpl32
1.78824e-12	-0.333057	0.984	0.994	2.91465e-08	Kidney2	Ptp4a2
1.93456e-12	0.379045	0.984	0.964	3.15314e-08	Kidney2	Eif4a2
1.93799e-12	0.270897	0.952	0.82	3.15874e-08	Kidney2	Eapp
2.01672e-12	0.301902	1	0.994	3.28704e-08	Kidney2	Psma2
2.05181e-12	0.326293	0.935	0.806	3.34424e-08	Kidney2	Frrs1
2.05466e-12	0.337946	0.903	0.877	3.34889e-08	Kidney2	Mvb12a
2.19353e-12	0.251261	0.855	0.667	3.57524e-08	Kidney2	Tor2a
2.24114e-12	0.36057	1	0.992	3.65284e-08	Kidney2	H3f3a
2.27279e-12	0.296191	0.903	0.744	3.70442e-08	Kidney2	Igbp1
2.3616e-12	-0.667406	0.79	0.963	3.84917e-08	Kidney2	Csrp2
2.36467e-12	-0.339589	0.177	0.64	3.85417e-08	Kidney2	Dclk1
2.411e-12	0.284073	0.677	0.393	3.92969e-08	Kidney2	Tcp11l1
2.42956e-12	-0.335595	0.935	0.988	3.95994e-08	Kidney2	Vat1
2.54472e-12	0.387719	0.79	0.492	4.14765e-08	Kidney2	Fam213a
2.61271e-12	0.298416	0.968	0.929	4.25846e-08	Kidney2	Sugt1
2.82983e-12	0.309739	0.984	0.98	4.61234e-08	Kidney2	Spcs2
2.9134e-12	-0.31865	0.371	0.845	4.74855e-08	Kidney2	Nnmt
3.04671e-12	0.365649	0.984	0.952	4.96584e-08	Kidney2	Ei24
3.1432e-12	-0.426524	1	1	5.12309e-08	Kidney2	Cald1
3.51634e-12	-0.410474	0.339	0.791	5.73128e-08	Kidney2	Smc4
3.89625e-12	-0.437882	0.032	0.508	6.35051e-08	Kidney2	Grem2
3.9268e-12	-0.46166	0.177	0.629	6.40029e-08	Kidney2	Col6a1
3.97776e-12	-0.287967	0.016	0.497	6.48334e-08	Kidney2	Slc1a6
4.00779e-12	0.279172	0.935	0.871	6.5323e-08	Kidney2	Cyth2
4.28092e-12	-0.319575	0.952	0.992	6.97747e-08	Kidney2	Serf2
4.45188e-12	0.332077	0.984	0.906	7.25612e-08	Kidney2	Ubl3
4.56362e-12	0.271593	0.855	0.674	7.43824e-08	Kidney2	Med19
4.64213e-12	0.331653	0.952	0.908	7.5662e-08	Kidney2	Bcl2l1
4.81978e-12	-0.324903	0.871	0.97	7.85576e-08	Kidney2	Gcsh
5.13535e-12	0.315119	0.887	0.597	8.3701e-08	Kidney2	Tcn2
5.18915e-12	-0.392499	0.823	0.972	8.4578e-08	Kidney2	Ddx21
5.45472e-12	-0.324491	0.79	0.935	8.89065e-08	Kidney2	Pold4
5.46908e-12	0.264143	0.903	0.8	8.91406e-08	Kidney2	Dpcd
5.52045e-12	0.31001	0.919	0.76	8.99777e-08	Kidney2	Pvrl2
5.53913e-12	0.412813	0.935	0.907	9.02822e-08	Kidney2	Plpp2
5.58777e-12	-0.54862	0.113	0.577	9.10751e-08	Kidney2	Ptx3
5.65963e-12	0.332189	0.935	0.901	9.22462e-08	Kidney2	Pdcd10
5.77485e-12	0.346707	0.935	0.897	9.41244e-08	Kidney2	Acot9
5.80001e-12	0.286251	0.984	0.889	9.45344e-08	Kidney2	Frg1
5.81971e-12	0.339104	0.952	0.904	9.48554e-08	Kidney2	Drg1
5.86044e-12	-0.550008	0.887	0.988	9.55194e-08	Kidney2	Cd44
6.18958e-12	0.31564	1	0.967	1.00884e-07	Kidney2	Csnk2b
6.23666e-12	-0.42427	0.677	0.94	1.01651e-07	Kidney2	Wisp1
6.24559e-12	0.320079	0.855	0.754	1.01797e-07	Kidney2	Vta1
6.80007e-12	0.298127	1	0.992	1.10834e-07	Kidney2	Psmb6
6.92981e-12	0.274343	0.887	0.766	1.12949e-07	Kidney2	Mvp
7.33481e-12	0.42091	0.984	0.971	1.1955e-07	Kidney2	Capg
7.38041e-12	0.420346	1	0.995	1.20293e-07	Kidney2	Atp6v1g1
7.57018e-12	-0.268364	0.984	1	1.23386e-07	Kidney2	Rpl22
7.58394e-12	0.282024	0.855	0.632	1.23611e-07	Kidney2	Sh3d19
7.6227e-12	0.317561	1	0.958	1.24242e-07	Kidney2	Polr2g
7.69261e-12	0.331894	1	0.937	1.25382e-07	Kidney2	Mdh1
8.02128e-12	0.338078	0.79	0.549	1.30739e-07	Kidney2	Dusp14
8.60309e-12	0.467587	0.726	0.423	1.40222e-07	Kidney2	Hoxa7
8.69931e-12	0.254021	0.71	0.426	1.4179e-07	Kidney2	Fbrsl1
9.14302e-12	0.305088	1	0.941	1.49022e-07	Kidney2	Dnaja1
9.65124e-12	0.308901	0.984	0.973	1.57306e-07	Kidney2	Sec11a
1.02207e-11	0.387686	0.984	0.917	1.66588e-07	Kidney2	Ivns1abp
1.02511e-11	-0.343347	0.629	0.935	1.67083e-07	Kidney2	Qsox1
1.02706e-11	0.274585	0.839	0.692	1.67401e-07	Kidney2	Zdhhc12
1.03396e-11	-0.423328	0.903	0.982	1.68525e-07	Kidney2	Fermt2
1.03585e-11	0.250844	0.806	0.508	1.68834e-07	Kidney2	Sft2d2
1.07769e-11	-0.274892	0.887	0.972	1.75653e-07	Kidney2	Nckap1
1.07868e-11	0.275641	0.823	0.672	1.75814e-07	Kidney2	Brms1
1.07894e-11	0.321847	0.968	0.952	1.75857e-07	Kidney2	Psmd6
1.09804e-11	-0.276996	0.71	0.91	1.78969e-07	Kidney2	Dnajc25
1.17852e-11	0.314066	0.935	0.93	1.92086e-07	Kidney2	Dazap2
1.1977e-11	0.273736	0.952	0.892	1.95213e-07	Kidney2	Cmas
1.23143e-11	-0.268401	0.71	0.924	2.0071e-07	Kidney2	Rnft1
1.37633e-11	0.277204	0.935	0.844	2.24329e-07	Kidney2	Ciapin1
1.40568e-11	0.30964	1	0.973	2.29112e-07	Kidney2	Ergic3
1.66149e-11	0.320662	0.984	1	2.70806e-07	Kidney2	Psmd8
1.71057e-11	0.329971	1	0.991	2.78806e-07	Kidney2	Rabac1
1.71303e-11	-0.292818	0.339	0.741	2.79207e-07	Kidney2	B4galt5
1.71918e-11	0.336795	0.79	0.584	2.8021e-07	Kidney2	Fam69a
1.74192e-11	0.288586	0.919	0.805	2.83916e-07	Kidney2	Dpp3
1.75084e-11	0.255058	0.903	0.747	2.8537e-07	Kidney2	Prkci
1.81801e-11	-0.320223	0.823	0.944	2.96318e-07	Kidney2	Yif1b
1.85339e-11	0.405047	0.952	0.87	3.02084e-07	Kidney2	Asns
1.98075e-11	0.280594	1	0.981	3.22842e-07	Kidney2	Vps29
2.00506e-11	-0.309722	0.71	0.941	3.26805e-07	Kidney2	Sec11c
2.09889e-11	0.302439	0.984	0.978	3.42097e-07	Kidney2	Psma5
2.12224e-11	0.276434	0.984	0.958	3.45905e-07	Kidney2	Tax1bp1
2.12472e-11	0.372482	0.919	0.875	3.46308e-07	Kidney2	Rras
2.21589e-11	0.271582	0.935	0.857	3.61168e-07	Kidney2	Maf1
2.24212e-11	-0.299284	0.597	0.897	3.65443e-07	Kidney2	Nolc1
2.27418e-11	0.279702	0.984	0.925	3.70668e-07	Kidney2	Unc50
2.29655e-11	0.460598	0.952	0.873	3.74315e-07	Kidney2	Nfib
2.35056e-11	0.307858	1	0.985	3.83117e-07	Kidney2	Chmp3
2.44985e-11	0.292051	0.839	0.7	3.99301e-07	Kidney2	Pxn
2.50955e-11	-0.888447	0.452	0.798	4.09031e-07	Kidney2	Cnn1
2.53261e-11	0.251875	0.935	0.785	4.1279e-07	Kidney2	Nsmce1
2.62063e-11	0.266118	1	0.996	4.27137e-07	Kidney2	Atp5a1
2.62281e-11	0.317451	0.855	0.557	4.27491e-07	Kidney2	Hoxb2
2.64641e-11	0.312333	0.903	0.873	4.31339e-07	Kidney2	Dnajc7
2.7234e-11	0.35632	1	1	4.43887e-07	Kidney2	Hspa8
2.73086e-11	-0.345348	0.968	0.993	4.45103e-07	Kidney2	Gng12
2.78971e-11	-0.449365	0.387	0.779	4.54695e-07	Kidney2	Fabp5
2.84309e-11	-0.31361	0.5	0.874	4.63395e-07	Kidney2	Rbms3
2.85457e-11	0.358055	0.968	0.89	4.65267e-07	Kidney2	Puf60
2.90594e-11	0.355371	0.548	0.255	4.7364e-07	Kidney2	Gata3
3.26331e-11	0.303583	0.839	0.698	5.31887e-07	Kidney2	Plekhg3
3.35156e-11	0.274996	0.903	0.771	5.4627e-07	Kidney2	Kdm5b
3.56753e-11	0.280042	0.855	0.679	5.81472e-07	Kidney2	Ubxn2a
3.66024e-11	-0.367988	0.968	0.99	5.96583e-07	Kidney2	Gpx8
3.71554e-11	0.257949	0.79	0.623	6.05597e-07	Kidney2	B9d1
3.78645e-11	0.252642	0.839	0.669	6.17154e-07	Kidney2	Mrpl44
4.03784e-11	0.315481	1	0.998	6.58128e-07	Kidney2	Eif4a1
4.27114e-11	-0.31723	0.839	0.959	6.96153e-07	Kidney2	Pole4
4.40137e-11	0.363062	1	0.964	7.17379e-07	Kidney2	Lamp2
4.51868e-11	0.287164	0.952	0.897	7.36499e-07	Kidney2	Rbm42
4.53435e-11	0.271919	0.952	0.917	7.39053e-07	Kidney2	Rab11b
4.56869e-11	0.279078	0.968	0.883	7.44651e-07	Kidney2	Cib1
4.59767e-11	0.285567	0.887	0.827	7.49374e-07	Kidney2	Echs1
4.682e-11	-0.260629	0.581	0.878	7.6312e-07	Kidney2	Inppl1
4.69867e-11	-0.757954	0.194	0.617	7.65835e-07	Kidney2	Igf1
4.80497e-11	0.328487	0.984	0.989	7.83161e-07	Kidney2	Commd3
5.14467e-11	-0.419177	0.758	0.978	8.3853e-07	Kidney2	Prkcdbp
5.49836e-11	0.339428	0.903	0.806	8.96178e-07	Kidney2	Rtfdc1
5.50219e-11	-0.370272	1	1	8.96802e-07	Kidney2	Hspe1
5.53046e-11	0.297402	0.887	0.738	9.01409e-07	Kidney2	Plin3
5.70485e-11	-0.268163	0.855	0.954	9.29834e-07	Kidney2	Gm10076
5.73558e-11	0.402619	0.984	0.956	9.34842e-07	Kidney2	Fam3c
6.06592e-11	0.322374	1	0.949	9.88684e-07	Kidney2	Serf1
6.22038e-11	0.329885	0.774	0.6	1.01386e-06	Kidney2	Glis2
6.24643e-11	-0.31412	0.968	0.984	1.01811e-06	Kidney2	Cnih1
6.32744e-11	0.294951	0.984	0.953	1.03131e-06	Kidney2	Gipc1
6.36964e-11	-0.290813	0.565	0.883	1.03819e-06	Kidney2	Msrb3
6.66137e-11	0.25309	0.758	0.483	1.08574e-06	Kidney2	Plekha1
6.91551e-11	0.296366	0.968	0.895	1.12716e-06	Kidney2	Mkrn1
7.15548e-11	-0.292669	0.919	0.98	1.16627e-06	Kidney2	Sec61a1
7.17334e-11	0.259936	0.774	0.466	1.16918e-06	Kidney2	Mex3a
7.33669e-11	-0.319035	0.839	0.952	1.19581e-06	Kidney2	Ahcyl1
7.35248e-11	0.30997	1	0.999	1.19838e-06	Kidney2	Lamp1
7.41199e-11	-0.32437	0.984	0.995	1.20808e-06	Kidney2	Cfl2
7.44156e-11	0.265642	0.984	0.987	1.2129e-06	Kidney2	Sumo1
7.4482e-11	0.265801	0.984	0.971	1.21398e-06	Kidney2	Ptov1
7.6449e-11	-0.59993	0.194	0.63	1.24604e-06	Kidney2	Smoc2
7.6682e-11	0.362065	1	0.95	1.24984e-06	Kidney2	Dnajc5
8.35585e-11	-0.395326	0.661	0.896	1.36192e-06	Kidney2	Tipin
8.40023e-11	0.388038	0.79	0.526	1.36915e-06	Kidney2	Ddit4l
8.44144e-11	-0.403234	0.355	0.753	1.37587e-06	Kidney2	Angptl2
8.63111e-11	-0.351842	0.016	0.456	1.40678e-06	Kidney2	Frzb
9.49744e-11	0.269136	1	0.995	1.54799e-06	Kidney2	Atp5f1
9.54875e-11	0.274566	1	0.958	1.55635e-06	Kidney2	Psmc2
9.5967e-11	-0.422551	0.016	0.455	1.56417e-06	Kidney2	Tcf21
9.78449e-11	0.270234	0.855	0.551	1.59477e-06	Kidney2	Syne2
1.00323e-10	0.294033	0.968	0.866	1.63517e-06	Kidney2	2510039O18Rik
1.05116e-10	-0.251726	1	1	1.71328e-06	Kidney2	Rpl14
1.08419e-10	0.262422	0.952	0.932	1.76712e-06	Kidney2	Csnk1e
1.12465e-10	-0.323206	0.903	0.978	1.83307e-06	Kidney2	Mcfd2
1.17594e-10	0.276513	0.742	0.508	1.91666e-06	Kidney2	Haghl
1.18499e-10	0.270578	1	1	1.93142e-06	Kidney2	Ndufa13
1.20922e-10	-0.268979	0.823	0.972	1.9709e-06	Kidney2	Pabpc4
1.21035e-10	0.281255	0.903	0.805	1.97275e-06	Kidney2	Snap47
1.24734e-10	-0.510638	0.145	0.568	2.03303e-06	Kidney2	Gdf6
1.28871e-10	0.361538	0.694	0.466	2.10047e-06	Kidney2	Cgnl1
1.31299e-10	0.286786	0.968	0.963	2.14005e-06	Kidney2	Psmc5
1.36385e-10	0.301173	1	0.979	2.22295e-06	Kidney2	Uqcrfs1
1.39507e-10	-0.315975	0.952	0.988	2.27382e-06	Kidney2	Sar1a
1.52433e-10	-0.262732	0.855	0.965	2.48451e-06	Kidney2	Pam16
1.53806e-10	0.298643	0.952	0.82	2.50688e-06	Kidney2	Ndufv1
1.54594e-10	0.282551	0.903	0.742	2.51974e-06	Kidney2	Fbxo6
1.59886e-10	-0.392368	0.726	0.912	2.60598e-06	Kidney2	Prkar2a
1.61036e-10	0.301957	0.919	0.801	2.62473e-06	Kidney2	Ifi30
1.64066e-10	0.301398	0.919	0.891	2.67411e-06	Kidney2	Thyn1
1.65461e-10	-0.327636	0.065	0.5	2.69685e-06	Kidney2	Sfrp1
1.68337e-10	0.33113	1	0.958	2.74372e-06	Kidney2	Tmbim4
1.81528e-10	0.27301	0.839	0.709	2.95872e-06	Kidney2	Amn1
1.93156e-10	-0.304254	0.823	0.953	3.14825e-06	Kidney2	Hmgn3
2.00142e-10	-0.286679	0.081	0.514	3.26212e-06	Kidney2	Rgs16
2.00295e-10	0.265836	0.952	0.942	3.26461e-06	Kidney2	Suclg1
2.04883e-10	0.431723	0.79	0.576	3.33939e-06	Kidney2	Adamts1
2.05251e-10	0.288969	0.952	0.89	3.34538e-06	Kidney2	Rb1cc1
2.06955e-10	0.254602	1	0.987	3.37316e-06	Kidney2	Dnajc8
2.09224e-10	0.370472	0.935	0.928	3.41015e-06	Kidney2	Uap1
2.10995e-10	-0.290456	0.887	0.978	3.43901e-06	Kidney2	Strn3
2.16219e-10	0.280542	0.968	0.965	3.52415e-06	Kidney2	Tbcb
2.20673e-10	0.271086	0.742	0.461	3.59675e-06	Kidney2	Mfap3l
2.21259e-10	0.251981	0.984	0.982	3.6063e-06	Kidney2	Sf3b6
2.22157e-10	-0.27278	1	1	3.62094e-06	Kidney2	Rps4x
2.24659e-10	-0.332538	0.032	0.466	3.66171e-06	Kidney2	Olfml3
2.27028e-10	-0.362376	0.613	0.884	3.70032e-06	Kidney2	Grb10
2.31462e-10	0.265162	0.935	0.789	3.7726e-06	Kidney2	Ubl7
2.3217e-10	0.273418	0.935	0.856	3.78414e-06	Kidney2	Acaa1a
2.34111e-10	-0.343582	0.516	0.879	3.81578e-06	Kidney2	Nexn
2.37517e-10	0.339601	0.823	0.611	3.87129e-06	Kidney2	Fgd3
2.45127e-10	-0.407744	0.387	0.779	3.99533e-06	Kidney2	Ptprb
2.4902e-10	0.309153	0.952	0.883	4.05878e-06	Kidney2	Sac3d1
2.56108e-10	-0.767443	0.645	0.9	4.1743e-06	Kidney2	Hmga2
2.58612e-10	0.343917	1	0.928	4.21512e-06	Kidney2	Zfand5
2.82603e-10	-0.254945	0.806	0.935	4.60614e-06	Kidney2	Plod3
2.9458e-10	0.292934	0.968	0.848	4.80136e-06	Kidney2	Snx2
3.09122e-10	0.263098	1	0.99	5.03837e-06	Kidney2	Paip2
3.09723e-10	0.313061	0.823	0.623	5.04818e-06	Kidney2	Cbr1
3.17441e-10	-0.252497	0.726	0.9	5.17396e-06	Kidney2	Sec23a
3.32243e-10	0.303491	0.903	0.731	5.41522e-06	Kidney2	Slc38a1
3.63592e-10	0.418307	1	0.993	5.92619e-06	Kidney2	Sri
3.83917e-10	0.288417	1	0.995	6.25746e-06	Kidney2	Mdh2
3.97044e-10	0.28321	1	0.991	6.47141e-06	Kidney2	Sdcbp
4.61989e-10	-0.451169	0.565	0.808	7.52995e-06	Kidney2	Arhgdib
4.73325e-10	-0.413995	0.758	0.962	7.71472e-06	Kidney2	Ccdc80
4.78113e-10	0.268933	1	0.993	7.79276e-06	Kidney2	Nop10
5.37618e-10	0.36039	0.839	0.691	8.76264e-06	Kidney2	Nuak2
5.49333e-10	0.336271	0.839	0.701	8.95357e-06	Kidney2	Tgfbr2
5.88838e-10	0.275559	0.952	0.926	9.59747e-06	Kidney2	Hdac1
5.95827e-10	0.272975	0.984	0.925	9.71139e-06	Kidney2	Sbno1
6.22785e-10	-0.265397	1	0.997	1.01508e-05	Kidney2	Ssr3
6.52022e-10	0.312364	0.968	0.981	1.06273e-05	Kidney2	Psma1
6.77474e-10	-0.535684	0.903	0.984	1.10421e-05	Kidney2	Crlf1
7.03829e-10	-0.302688	0.452	0.815	1.14717e-05	Kidney2	Srxn1
7.05825e-10	-0.255111	0.984	1	1.15042e-05	Kidney2	Atp5g1
7.63653e-10	0.270334	0.629	0.346	1.24468e-05	Kidney2	Emb
7.63838e-10	0.263243	0.984	0.996	1.24498e-05	Kidney2	Psmb1
8.06832e-10	0.309351	0.645	0.38	1.31506e-05	Kidney2	2010300F17Rik
9.25818e-10	0.276829	0.968	0.895	1.50899e-05	Kidney2	Utp3
9.69485e-10	-0.296099	0.323	0.738	1.58016e-05	Kidney2	Vcam1
9.8722e-10	-0.333523	0.516	0.857	1.60907e-05	Kidney2	Jade1
1.01891e-09	-0.285791	0.048	0.46	1.66072e-05	Kidney2	Has2
1.0608e-09	0.266295	1	0.958	1.72901e-05	Kidney2	Rnh1
1.07268e-09	0.447559	0.919	0.829	1.74836e-05	Kidney2	Tinagl1
1.08011e-09	0.25496	0.952	0.891	1.76047e-05	Kidney2	Slc25a11
1.12058e-09	0.28915	0.952	0.837	1.82643e-05	Kidney2	Grina
1.12265e-09	-0.291567	0.984	0.996	1.8298e-05	Kidney2	Comt
1.13976e-09	-0.285029	1	1	1.85769e-05	Kidney2	Eef1b2
1.26891e-09	-0.371772	0.371	0.726	2.06819e-05	Kidney2	Tgfb3
1.30892e-09	0.380867	1	0.999	2.1334e-05	Kidney2	mt-Co1
1.32368e-09	-0.283095	0.742	0.953	2.15747e-05	Kidney2	Ccnd3
1.35962e-09	-0.466915	0.194	0.581	2.21605e-05	Kidney2	Prrx2
1.37624e-09	0.269914	1	0.986	2.24313e-05	Kidney2	Skp1a
1.41266e-09	0.268834	0.968	0.939	2.3025e-05	Kidney2	Nfu1
1.45429e-09	0.283981	1	0.988	2.37035e-05	Kidney2	Cct7
1.51357e-09	-1.0021	0.452	0.745	2.46697e-05	Kidney2	Tnnt2
1.55198e-09	0.312423	0.968	0.924	2.52958e-05	Kidney2	Creb3
1.584e-09	0.275183	0.968	0.917	2.58176e-05	Kidney2	Magoh
1.61701e-09	-0.304056	0.952	0.976	2.63556e-05	Kidney2	Cmtm7
1.69523e-09	-0.290128	0.565	0.868	2.76305e-05	Kidney2	Tcf4
1.72527e-09	-0.29848	0.661	0.907	2.81203e-05	Kidney2	Tsc22d2
1.73707e-09	-0.280458	0.903	0.965	2.83125e-05	Kidney2	Sec61g
1.82878e-09	0.255875	0.839	0.707	2.98072e-05	Kidney2	Upf3b
1.98168e-09	-0.341758	0.984	0.996	3.22994e-05	Kidney2	Serp1
2.12706e-09	0.381006	0.855	0.677	3.4669e-05	Kidney2	Dcxr
2.24992e-09	-0.300919	0.871	0.97	3.66714e-05	Kidney2	Kpnb1
2.42234e-09	-0.284339	1	1	3.94817e-05	Kidney2	Sec61b
2.63307e-09	0.293298	0.984	0.968	4.29164e-05	Kidney2	Tkt
2.77437e-09	0.268785	1	0.985	4.52194e-05	Kidney2	Mtch2
2.8296e-09	-0.500811	0.871	0.993	4.61197e-05	Kidney2	Anxa1
3.00605e-09	-0.380813	0.097	0.487	4.89956e-05	Kidney2	Aldh1a1
3.02389e-09	0.293276	0.806	0.708	4.92864e-05	Kidney2	Eci1
3.10759e-09	-0.31447	0.855	0.968	5.06506e-05	Kidney2	Dnajc3
3.23096e-09	0.283861	1	0.979	5.26615e-05	Kidney2	H2afy
3.23231e-09	0.297239	0.79	0.69	5.26834e-05	Kidney2	Cd99l2
3.35876e-09	0.544134	0.935	0.878	5.47445e-05	Kidney2	Hist1h1c
3.85894e-09	0.273762	0.79	0.655	6.28968e-05	Kidney2	Mrps9
3.8717e-09	-0.509281	0.887	0.931	6.31048e-05	Kidney2	Cebpb
4.03821e-09	-0.466146	0.645	0.89	6.58187e-05	Kidney2	Ecm1
4.08402e-09	0.267667	0.903	0.866	6.65654e-05	Kidney2	Cmc1
4.10673e-09	-0.408545	1	0.998	6.69356e-05	Kidney2	Esd
4.20335e-09	-0.259639	0.274	0.682	6.85105e-05	Kidney2	Nfia
4.20488e-09	0.286553	0.823	0.66	6.85353e-05	Kidney2	Ubald2
4.30898e-09	0.293992	0.984	0.935	7.0232e-05	Kidney2	Tmem70
4.43164e-09	-0.385434	0.581	0.861	7.22313e-05	Kidney2	Pam
4.55354e-09	0.37526	0.952	0.868	7.42182e-05	Kidney2	Tmem43
5.11116e-09	0.323296	1	0.999	8.33068e-05	Kidney2	Anxa5
5.15316e-09	0.297209	0.823	0.665	8.39914e-05	Kidney2	Nrip1
5.17471e-09	0.41805	0.871	0.75	8.43425e-05	Kidney2	Fdps
5.30028e-09	-0.503897	1	0.992	8.63892e-05	Kidney2	Id3
5.33735e-09	0.272215	0.952	0.975	8.69935e-05	Kidney2	Tor1aip2
5.50008e-09	0.258705	0.871	0.791	8.96457e-05	Kidney2	Eif2s3y
5.51093e-09	0.315497	0.968	0.949	8.98227e-05	Kidney2	Ccni
5.77521e-09	-0.964788	0.758	0.94	9.41301e-05	Kidney2	Gpx3
5.81396e-09	-0.827506	0.129	0.493	9.47617e-05	Kidney2	2810417H13Rik
6.28099e-09	-0.293451	0.129	0.518	0.000102374	Kidney2	Lmod1
6.47179e-09	-0.336646	0.565	0.892	0.000105484	Kidney2	Hexa
6.737e-09	0.265553	0.919	0.823	0.000109806	Kidney2	Ube2g1
6.8875e-09	0.259084	0.839	0.66	0.000112259	Kidney2	Rgs12
7.14605e-09	0.443072	0.887	0.727	0.000116473	Kidney2	Stmn1
7.86588e-09	0.258061	0.952	0.927	0.000128206	Kidney2	R3hdm4
8.04044e-09	-0.289791	0.048	0.427	0.000131051	Kidney2	Sod3
8.27309e-09	0.645489	0.984	0.988	0.000134843	Kidney2	Hspb1
8.41145e-09	0.268014	1	0.976	0.000137098	Kidney2	Taldo1
8.42305e-09	0.307199	1	0.992	0.000137287	Kidney2	Glrx3
8.79566e-09	0.273191	0.984	0.933	0.00014336	Kidney2	Lrp10
9.03782e-09	0.325761	1	0.988	0.000147307	Kidney2	Wls
9.07081e-09	0.288543	0.839	0.7	0.000147845	Kidney2	Ptpn14
9.95206e-09	0.262093	0.903	0.704	0.000162209	Kidney2	Ptk7
9.96522e-09	-0.304516	0.984	0.986	0.000162423	Kidney2	Pdap1
1.08021e-08	0.267608	0.984	0.975	0.000176063	Kidney2	Ndufs2
1.08256e-08	0.340471	0.984	0.97	0.000176447	Kidney2	Tuba1c
1.08822e-08	-0.409425	0.242	0.662	0.000177369	Kidney2	Adm
1.12215e-08	0.253304	0.984	0.981	0.0001829	Kidney2	Hnrnpf
1.12228e-08	-0.269976	1	1	0.00018292	Kidney2	Fkbp1a
1.16267e-08	0.273705	0.968	0.945	0.000189504	Kidney2	Psmd14
1.38287e-08	-0.320316	0.129	0.504	0.000225393	Kidney2	Gpnmb
1.38724e-08	0.251297	0.952	0.941	0.000226105	Kidney2	Yipf4
1.42837e-08	0.311115	0.855	0.802	0.00023281	Kidney2	Mgmt
1.47571e-08	-0.796604	0.242	0.605	0.000240525	Kidney2	Ccl7
1.48307e-08	0.297368	0.726	0.506	0.000241725	Kidney2	Dusp10
1.50332e-08	0.325988	0.984	0.941	0.000245027	Kidney2	Ier5
1.52706e-08	-0.254641	0.661	0.89	0.000248895	Kidney2	Esyt2
1.57984e-08	0.304703	0.903	0.863	0.000257497	Kidney2	Ndnl2
1.58582e-08	0.284468	1	0.956	0.000258473	Kidney2	Myof
1.62281e-08	-0.319865	0.387	0.696	0.000264503	Kidney2	Smad6
1.69853e-08	-0.251616	0.903	0.971	0.000276844	Kidney2	Tulp4
1.73293e-08	0.251894	0.823	0.78	0.00028245	Kidney2	Hadh
1.75147e-08	-0.298047	0.661	0.913	0.000285473	Kidney2	Lyar
1.79309e-08	-0.441374	0.968	0.975	0.000292256	Kidney2	Tns1
2.1298e-08	-0.333659	0.565	0.844	0.000347135	Kidney2	Cdh11
2.16867e-08	0.253654	0.903	0.844	0.000353472	Kidney2	Dapk3
2.31977e-08	-0.353699	0.774	0.904	0.000378099	Kidney2	Col12a1
2.67173e-08	0.324538	0.629	0.388	0.000435465	Kidney2	Fos
2.79847e-08	0.266235	0.935	0.918	0.000456123	Kidney2	Snx6
2.92578e-08	-0.666346	0.21	0.549	0.000476872	Kidney2	Tbx20
2.97814e-08	-0.307477	0.323	0.657	0.000485407	Kidney2	Cenpw
3.17751e-08	0.354844	0.742	0.583	0.000517902	Kidney2	Endod1
3.22604e-08	-0.264369	1	1	0.000525812	Kidney2	Pabpc1
3.5152e-08	0.260556	0.645	0.432	0.000572943	Kidney2	Col7a1
3.52976e-08	0.309094	0.855	0.686	0.000575315	Kidney2	Ptp4a3
3.5935e-08	-0.413287	0.968	0.985	0.000585705	Kidney2	Tubb6
3.67477e-08	-0.411511	0.468	0.815	0.000598951	Kidney2	Creg1
3.8098e-08	-0.286004	0.968	0.989	0.000620959	Kidney2	Aprt
4.1164e-08	0.272585	0.419	0.183	0.000670932	Kidney2	Hspa1a
4.7592e-08	0.266274	0.726	0.596	0.000775702	Kidney2	Fam107b
4.76897e-08	0.267651	0.758	0.531	0.000777294	Kidney2	Fam129a
5.03076e-08	-0.590316	0.145	0.499	0.000819964	Kidney2	Dcn
5.08417e-08	-0.619154	0.113	0.466	0.000828669	Kidney2	Grem1
5.28235e-08	-0.659573	0.726	0.945	0.00086097	Kidney2	Ckb
5.36258e-08	-0.330687	0.097	0.45	0.000874047	Kidney2	Cdca3
5.45654e-08	0.277632	0.952	0.903	0.000889361	Kidney2	Limd2
5.54528e-08	0.262367	0.984	0.978	0.000903826	Kidney2	Prmt1
5.66004e-08	-0.365096	0.984	0.989	0.00092253	Kidney2	Ifitm2
5.81798e-08	0.253047	0.79	0.686	0.000948273	Kidney2	Elf1
5.83472e-08	0.27328	0.935	0.907	0.000951	Kidney2	Rnaseh2c
6.64133e-08	-0.53904	0.161	0.506	0.00108247	Kidney2	Cenpa
6.77866e-08	-1.72818	0.758	0.882	0.00110485	Kidney2	Cck
6.93015e-08	-0.443252	0.887	0.916	0.00112955	Kidney2	Dut
7.20395e-08	-0.380221	0.145	0.5	0.00117417	Kidney2	Cemip
7.30266e-08	0.254364	0.984	0.96	0.00119026	Kidney2	Cux1
7.55041e-08	-0.321319	0.661	0.866	0.00123064	Kidney2	Ugcg
7.9761e-08	0.392535	1	0.999	0.00130002	Kidney2	Prdx5
8.0298e-08	0.25024	1	0.996	0.00130878	Kidney2	Tnfrsf12a
8.22972e-08	0.371841	1	0.995	0.00134136	Kidney2	Tspo
8.30362e-08	0.287965	1	1	0.00135341	Kidney2	Myl12a
8.31884e-08	0.250969	0.71	0.568	0.00135589	Kidney2	Sec22a
1.01505e-07	-0.356766	0.935	0.951	0.00165444	Kidney2	Plod2
1.03232e-07	0.304048	0.952	0.929	0.00168259	Kidney2	Fblim1
1.07727e-07	0.264381	1	1	0.00175584	Kidney2	Eef2
1.1066e-07	0.349275	0.403	0.169	0.00180365	Kidney2	Fam150a
1.113e-07	0.265055	0.919	0.925	0.00181408	Kidney2	Ddx39
1.15121e-07	0.260297	1	0.989	0.00187636	Kidney2	Ywhah
1.20856e-07	0.257117	1	0.992	0.00196983	Kidney2	Hspa9
1.23688e-07	0.314963	1	0.991	0.002016	Kidney2	Gsn
1.29952e-07	-0.269982	0.903	0.98	0.00211809	Kidney2	Gatad1
1.49436e-07	-0.301783	0.984	0.988	0.00243566	Kidney2	Rock2
1.74954e-07	-0.41168	0.532	0.797	0.00285157	Kidney2	Sh3kbp1
1.84853e-07	0.301865	0.823	0.807	0.00301293	Kidney2	Rnd3
1.8515e-07	-0.422154	0.629	0.814	0.00301776	Kidney2	Psat1
1.85912e-07	0.25784	0.484	0.259	0.00303018	Kidney2	Itm2a
1.90391e-07	0.534369	0.855	0.797	0.00310319	Kidney2	Nfkbia
2.01857e-07	-0.307144	0.435	0.736	0.00329006	Kidney2	Ank
2.04454e-07	0.262107	0.984	0.932	0.0033324	Kidney2	Anp32a
2.12469e-07	0.365681	0.984	0.981	0.00346303	Kidney2	Hist1h2bc
2.17559e-07	-0.325555	0.935	0.976	0.003546	Kidney2	Slc6a6
2.20694e-07	0.396367	0.984	0.995	0.0035971	Kidney2	Anxa3
2.23761e-07	-0.876172	0.274	0.601	0.00364709	Kidney2	Igfbp4
2.26e-07	0.289003	0.839	0.785	0.00368357	Kidney2	Zfp664
2.26254e-07	-0.467729	1	1	0.00368771	Kidney2	Thbs1
2.46461e-07	0.265843	0.952	0.9	0.00401707	Kidney2	Ddr1
2.87653e-07	-0.27974	0.984	0.993	0.00468846	Kidney2	Ppp1r14b
2.88785e-07	-0.274811	0.194	0.534	0.0047069	Kidney2	Sepp1
3.25282e-07	0.25074	0.919	0.877	0.00530177	Kidney2	Cttnbp2nl
3.3838e-07	-0.258918	0.581	0.819	0.00551525	Kidney2	Nav1
3.55026e-07	-0.314835	0.984	0.985	0.00578656	Kidney2	Anp32b
3.59341e-07	-0.251724	0.79	0.949	0.0058569	Kidney2	Metrnl
3.60358e-07	0.31043	1	0.985	0.00587347	Kidney2	Nisch
4.10342e-07	-0.48451	0.387	0.678	0.00668817	Kidney2	Rrm2
4.18869e-07	-0.257594	0.758	0.965	0.00682714	Kidney2	Hacd1
5.4981e-07	-0.369103	1	0.999	0.00896135	Kidney2	Dbi
5.88901e-07	-0.284966	0.048	0.362	0.0095985	Kidney2	Ccna2
5.91611e-07	-0.27353	1	0.996	0.00964267	Kidney2	Snrpf
6.25282e-07	-0.316392	0.984	0.998	0.0101915	Kidney2	Set
6.29866e-07	-0.282964	1	1	0.0102662	Kidney2	Tpm4
6.60666e-07	0.427554	0.565	0.376	0.0107682	Kidney2	Serpinb9
6.91627e-07	0.265735	1	0.975	0.0112728	Kidney2	Anxa6
7.07816e-07	-0.313369	0.484	0.76	0.0115367	Kidney2	Plpp3
7.18264e-07	-0.270602	0.016	0.315	0.011707	Kidney2	Mki67
7.65791e-07	-0.56901	0.968	0.996	0.0124816	Kidney2	Tm4sf1
8.99169e-07	-0.304027	0.903	0.969	0.0146556	Kidney2	Srsf7
9.15378e-07	-0.312228	0.113	0.433	0.0149197	Kidney2	Cdc20
9.41026e-07	-0.315138	0.871	0.977	0.0153378	Kidney2	Pdlim5
1.00949e-06	0.36143	0.952	0.907	0.0164537	Kidney2	Snx18
1.12197e-06	-0.439393	0.581	0.836	0.018287	Kidney2	Fst
1.12267e-06	-0.302364	1	0.997	0.0182984	Kidney2	Ldha
1.18864e-06	-0.304056	0.968	0.992	0.0193737	Kidney2	Hspd1
1.2492e-06	-0.272302	0.5	0.772	0.0203606	Kidney2	Zdhhc2
1.27133e-06	-0.280571	0.694	0.867	0.0207213	Kidney2	Tgfb1
1.30462e-06	-0.321686	0.081	0.378	0.021264	Kidney2	Hsd11b1
1.57443e-06	0.262177	0.984	0.946	0.0256616	Kidney2	Ctnnd1
1.65462e-06	-0.267969	0.887	0.945	0.0269686	Kidney2	Sdc2
1.76141e-06	-0.262838	0.919	0.986	0.0287092	Kidney2	Degs1
2.15514e-06	-0.523504	0.855	0.958	0.0351267	Kidney2	Card19
2.25958e-06	0.370805	0.806	0.778	0.0368288	Kidney2	Snhg12
2.32153e-06	-0.574143	0.306	0.579	0.0378387	Kidney2	Ube2c
2.4084e-06	-0.256018	0.065	0.356	0.0392545	Kidney2	Cenpf
2.54589e-06	-0.327564	0.065	0.348	0.0414954	Kidney2	Nrn1
2.97693e-06	-0.272361	0.726	0.865	0.048521	Kidney2	Ltbp1
3.04393e-06	-0.260728	0.968	0.988	0.0496131	Kidney2	Sept11
3.47765e-06	-0.259006	1	0.998	0.0566822	Kidney2	Ssr4
3.51969e-06	-0.256413	0.339	0.609	0.0573674	Kidney2	Synpo
3.65192e-06	0.264446	0.903	0.874	0.0595226	Kidney2	Bmp1
4.48995e-06	-0.271033	1	0.996	0.0731817	Kidney2	Ahnak
5.87292e-06	-0.324393	0.371	0.668	0.0957227	Kidney2	Ptgs1
7.02233e-06	-0.29944	0.145	0.425	0.114457	Kidney2	Prc1
7.66833e-06	-0.312123	0.903	0.949	0.124986	Kidney2	Crim1
7.87887e-06	0.277445	1	1	0.128418	Kidney2	S100a11
7.93695e-06	-0.319873	0.903	0.977	0.129364	Kidney2	Gadd45g
9.54552e-06	-0.272599	0.613	0.811	0.155582	Kidney2	Ebf1
9.65071e-06	0.264984	0.984	0.954	0.157297	Kidney2	Grn
1.11212e-05	-0.631189	0.194	0.464	0.181264	Kidney2	Actg2
1.28886e-05	0.304369	0.645	0.498	0.210071	Kidney2	Nfil3
1.30848e-05	-0.447949	0.161	0.432	0.213269	Kidney2	Top2a
1.43004e-05	-0.371618	0.661	0.889	0.233082	Kidney2	Cav1
1.55058e-05	0.262923	0.79	0.665	0.252729	Kidney2	Irgm1
1.60988e-05	-0.303719	0.081	0.344	0.262395	Kidney2	Dkk2
1.75856e-05	-0.350701	0.081	0.348	0.286628	Kidney2	Ccl17
1.76349e-05	0.269813	1	0.976	0.287431	Kidney2	Tubb4b
2.02789e-05	0.399038	0.823	0.76	0.330525	Kidney2	Adamts5
2.19899e-05	-0.299478	0.016	0.256	0.358413	Kidney2	Cx3cr1
2.37167e-05	-0.584842	0.339	0.574	0.386559	Kidney2	Birc5
2.52039e-05	-0.262471	0.758	0.922	0.410799	Kidney2	Atf5
3.36329e-05	-0.360178	0.323	0.599	0.548183	Kidney2	Cdk1
3.84169e-05	-0.39951	0.597	0.838	0.626157	Kidney2	Slc39a1
3.97821e-05	-0.353907	0.306	0.541	0.648409	Kidney2	Cst6
4.33921e-05	0.350131	0.887	0.909	0.707248	Kidney2	Tubb2b
4.56958e-05	-0.334306	0.919	0.972	0.744796	Kidney2	Lmo4
4.68259e-05	-0.310807	0.161	0.408	0.763215	Kidney2	Col6a3
7.98063e-05	0.420178	1	0.999	1	Kidney2	Fn1
8.37034e-05	-0.302124	0.065	0.298	1	Kidney2	Mylk
0.000104893	0.330034	0.742	0.678	1	Kidney2	Slco2a1
0.000157679	0.320278	0.79	0.741	1	Kidney2	Ddah2
0.000168979	0.291087	0.677	0.547	1	Kidney2	Tiparp
0.000172741	-0.322107	0.355	0.602	1	Kidney2	Gas6
0.000185538	-0.270116	1	0.999	1	Kidney2	Hsp90b1
0.000193434	-0.261069	1	1	1	Kidney2	Ftl1
0.000234689	0.43194	0.984	0.982	1	Kidney2	Neat1
0.000284562	-0.542917	1	1	1	Kidney2	Actb
0.000325162	0.37172	0.452	0.291	1	Kidney2	Serpinb6b
0.000340035	-0.323775	0.742	0.858	1	Kidney2	Dek
0.000390273	-0.257823	0.806	0.94	1	Kidney2	Tubb2a
0.000403244	-0.357598	1	0.993	1	Kidney2	Ctgf
0.000596266	0.282537	0.952	0.963	1	Kidney2	Mdm2
0.00118683	-0.619134	0.129	0.327	1	Kidney2	Esm1
0.00141753	-0.260191	1	0.997	1	Kidney2	Ran
0.00190959	0.384891	0.871	0.83	1	Kidney2	Akr1b8
0.00290793	-0.325647	0.613	0.772	1	Kidney2	Gstm1
0.00300881	-0.393832	0.403	0.617	1	Kidney2	Ccl2
0.00331927	-0.290335	0.29	0.47	1	Kidney2	Gm2115
0.00733337	-0.400831	1	0.988	1	Kidney2	Prss23
0.0125114	-0.408982	0.177	0.331	1	Kidney2	Crct1
0.0203313	-0.558859	0.274	0.472	1	Kidney2	Il11
0.0217709	-0.251518	0.661	0.762	1	Kidney2	Ltbp2
0.0245194	-0.254812	0.532	0.618	1	Kidney2	Smc2
0.0413109	-0.453499	1	0.998	1	Kidney2	Cst3
0.04348	-0.315758	0.484	0.553	1	Kidney2	Hmgb2
0.0526859	-0.593182	0.935	0.982	1	Kidney2	Ankrd1
0.10125	0.355217	0.935	0.979	1	Kidney2	Phlda1
0.111201	0.351733	0.984	0.974	1	Kidney2	Zfos1
0.179927	-0.321085	0.935	0.97	1	Kidney2	Itgb5
0.205836	-0.615789	0.403	0.521	1	Kidney2	Igfbp2
0.233865	0.292938	0.871	0.911	1	Kidney2	Ctla2a
0.271054	-0.312148	0.952	0.966	1	Kidney2	Cks1b
0.303293	0.362369	0.935	0.97	1	Kidney2	Mt1
0.386791	-0.264626	0.823	0.884	1	Kidney2	Ncam1
0.426811	0.288881	0.806	0.851	1	Kidney2	Mt2

## Sheet: HoxGenes 
p_val	avg_logFC	pct.1	pct.2	p_val_adj	cluster	gene
1.16413e-78	0.453065	0.904	0.287	1.89742e-74	HoxGenes	Hoxc8
7.07379e-77	0.349778	0.881	0.266	1.15296e-72	HoxGenes	Hoxc6
3.66685e-65	0.366302	0.881	0.306	5.9766e-61	HoxGenes	Hoxc9
1.07865e-63	0.55878	0.996	0.717	1.7581e-59	HoxGenes	Sh3kbp1
3.02348e-56	-0.543825	0.724	0.923	4.92797e-52	HoxGenes	Nfib
1.17257e-54	-0.864782	0.992	1	1.91118e-50	HoxGenes	Cst3
8.08228e-53	0.371517	0.95	0.67	1.31733e-48	HoxGenes	Bcat1
4.90448e-50	0.663001	0.989	0.913	7.99381e-46	HoxGenes	Itga5
6.60079e-50	-1.03856	0.847	0.948	1.07586e-45	HoxGenes	Cd9
1.10428e-49	1.04356	0.958	0.85	1.79987e-45	HoxGenes	Cck
1.17059e-49	0.81097	0.996	0.934	1.90795e-45	HoxGenes	Ptgs2
5.40369e-48	-0.765614	0.349	0.736	8.80747e-44	HoxGenes	Tmem176b
5.00206e-47	0.395151	0.785	0.334	8.15286e-43	HoxGenes	Hoxc10
1.11022e-46	0.30107	0.816	0.42	1.80954e-42	HoxGenes	Tll1
4.72008e-46	-1.65527	0.996	0.997	7.69326e-42	HoxGenes	S100a4
8.22287e-44	0.386602	0.992	0.891	1.34025e-39	HoxGenes	Tes
1.11533e-43	-0.603954	0.69	0.902	1.81787e-39	HoxGenes	Bicc1
1.96595e-43	0.424779	0.935	0.551	3.20431e-39	HoxGenes	Galnt18
2.11584e-43	0.391821	0.985	0.877	3.44861e-39	HoxGenes	Prkar2a
7.70146e-43	0.389784	0.985	0.927	1.25526e-38	HoxGenes	Glipr2
6.70822e-42	0.283659	0.87	0.495	1.09337e-37	HoxGenes	Tmcc3
1.18896e-41	0.368863	0.602	0.198	1.93789e-37	HoxGenes	C1qtnf3
1.19662e-41	0.398805	0.992	0.972	1.95037e-37	HoxGenes	Lasp1
1.83584e-41	0.447263	0.954	0.758	2.99223e-37	HoxGenes	Psat1
4.06818e-41	0.458003	0.939	0.662	6.63073e-37	HoxGenes	Flrt2
8.10063e-40	0.548259	0.985	0.731	1.32032e-35	HoxGenes	Serpinf1
1.191e-39	0.364425	0.946	0.6	1.94121e-35	HoxGenes	Igfbp6
2.94968e-38	0.270956	0.674	0.273	4.80769e-34	HoxGenes	Htr1b
6.38219e-38	-0.887124	0.973	0.995	1.04023e-33	HoxGenes	Itm2b
6.70236e-38	0.486137	0.985	0.886	1.09242e-33	HoxGenes	Mmd
7.77954e-38	0.331892	0.981	0.835	1.26799e-33	HoxGenes	Grb10
9.48172e-38	0.555757	0.9	0.616	1.54543e-33	HoxGenes	Thbs2
3.84743e-37	-0.661199	0.908	0.966	6.27092e-33	HoxGenes	Card19
1.57794e-36	-0.450103	0.207	0.609	2.57188e-32	HoxGenes	Tmem176a
1.80812e-36	-0.454825	0.533	0.827	2.94705e-32	HoxGenes	Zfp36l1
3.06307e-36	-0.734346	0.985	0.998	4.9925e-32	HoxGenes	Ctsd
3.49936e-36	-0.484276	0.356	0.679	5.70361e-32	HoxGenes	Col6a1
6.62937e-36	0.342088	0.989	0.941	1.08052e-31	HoxGenes	Map1b
7.77842e-36	0.327364	1	0.994	1.2678e-31	HoxGenes	Nap1l1
1.79969e-35	0.420527	0.962	0.756	2.93332e-31	HoxGenes	Lrrc32
2.20616e-35	-0.533254	0.23	0.619	3.59583e-31	HoxGenes	Cst6
2.88312e-35	0.546525	0.981	0.857	4.6992e-31	HoxGenes	Hmga2
3.54964e-35	0.349252	0.966	0.82	5.78556e-31	HoxGenes	Adam19
3.77323e-35	-0.783743	0.544	0.8	6.14998e-31	HoxGenes	Mgst1
5.63271e-35	-0.71613	0.483	0.77	9.18076e-31	HoxGenes	Gxylt2
8.60608e-35	0.657434	0.92	0.694	1.4027e-30	HoxGenes	Plac8
2.10466e-34	0.284815	0.935	0.744	3.43038e-30	HoxGenes	Gpd2
2.6721e-34	-0.703497	1	0.999	4.35526e-30	HoxGenes	Fn1
2.69781e-34	-0.328337	0.92	0.971	4.39716e-30	HoxGenes	Npdc1
7.26522e-34	-0.495394	0.977	0.995	1.18416e-29	HoxGenes	Crip2
9.7519e-34	0.292286	0.739	0.345	1.58946e-29	HoxGenes	Has2
1.40003e-33	0.26304	0.904	0.607	2.2819e-29	HoxGenes	Twist2
2.58056e-33	0.38516	0.996	0.991	4.20605e-29	HoxGenes	Eif4ebp1
3.63492e-33	-0.296829	0.429	0.738	5.92456e-29	HoxGenes	Ephx1
2.90422e-32	0.342926	0.996	0.993	4.73359e-28	HoxGenes	Zyx
1.08626e-31	0.408577	0.992	0.979	1.7705e-27	HoxGenes	Cd44
2.68209e-31	0.728232	0.946	0.819	4.37153e-27	HoxGenes	Meg3
6.60291e-31	0.290436	0.874	0.59	1.07621e-26	HoxGenes	Cd248
9.17963e-31	-0.928536	0.996	0.999	1.49619e-26	HoxGenes	Ctsl
9.57516e-31	-0.440595	0.797	0.9	1.56065e-26	HoxGenes	Ecm1
1.17665e-30	0.365579	0.989	0.969	1.91781e-26	HoxGenes	Fscn1
1.63984e-30	0.314187	0.889	0.61	2.67278e-26	HoxGenes	Nt5dc2
5.4116e-30	-0.432303	0.341	0.662	8.82037e-26	HoxGenes	Cxcl16
5.71207e-30	0.327796	0.996	0.979	9.31011e-26	HoxGenes	Pdlim1
1.46151e-29	-0.326817	0.46	0.757	2.38212e-25	HoxGenes	Fcgrt
1.49903e-29	-0.386204	1	0.999	2.44328e-25	HoxGenes	Gabarap
2.02416e-29	-0.337483	0.759	0.885	3.29917e-25	HoxGenes	2010111I01Rik
2.4203e-29	0.349628	0.977	0.893	3.94485e-25	HoxGenes	Atf5
3.73099e-29	0.291885	0.977	0.927	6.08113e-25	HoxGenes	Fez2
4.84913e-29	0.307064	0.989	0.903	7.9036e-25	HoxGenes	Lima1
5.11437e-29	-0.481117	0.808	0.919	8.33592e-25	HoxGenes	H1f0
1.77397e-28	0.564218	0.923	0.735	2.8914e-24	HoxGenes	Cnn1
2.65792e-28	0.260879	1	1	4.33215e-24	HoxGenes	Rtn4
3.26204e-28	-0.256804	0.103	0.463	5.3168e-24	HoxGenes	Hand2
7.56697e-28	-0.459323	0.931	0.963	1.23334e-23	HoxGenes	Grn
8.20369e-28	0.300358	0.985	0.873	1.33712e-23	HoxGenes	Soat1
9.69905e-28	-0.368536	1	0.999	1.58085e-23	HoxGenes	Lamp1
1.03657e-27	-0.795071	0.379	0.658	1.68951e-23	HoxGenes	Igf1
1.67909e-27	-0.310153	0.364	0.664	2.73674e-23	HoxGenes	Synpo
1.71299e-27	0.277655	0.954	0.786	2.79201e-23	HoxGenes	Creb3l1
2.72605e-27	-0.293629	0.858	0.95	4.44318e-23	HoxGenes	Pkig
3.55164e-27	0.512074	1	0.924	5.78882e-23	HoxGenes	Inhba
4.89277e-27	-0.317288	0.406	0.678	7.97472e-23	HoxGenes	Dclk1
5.37878e-27	-0.349442	0.939	0.976	8.76688e-23	HoxGenes	Serinc3
8.44702e-27	-0.317009	0.897	0.942	1.37678e-22	HoxGenes	Shisa4
9.48556e-27	-0.510312	0.387	0.683	1.54605e-22	HoxGenes	Sox9
1.09522e-26	-0.32274	0.142	0.486	1.7851e-22	HoxGenes	Sod3
1.33046e-26	0.499183	0.996	0.986	2.16852e-22	HoxGenes	Prss23
1.53524e-26	-0.415463	0.345	0.663	2.50228e-22	HoxGenes	Gas6
3.19392e-26	-0.394793	0.981	0.991	5.20577e-22	HoxGenes	Cyb5a
3.4221e-26	-0.387021	0.816	0.909	5.57768e-22	HoxGenes	H2-D1
5.73783e-26	-0.381459	0.1	0.441	9.35209e-22	HoxGenes	Hsd11b1
7.41735e-26	-0.600861	1	1	1.20895e-21	HoxGenes	Igfbp7
9.62165e-26	-0.515725	0.992	0.997	1.56823e-21	HoxGenes	Cd81
1.28528e-25	0.254316	1	0.991	2.09488e-21	HoxGenes	Lrrc59
1.43508e-25	0.297141	0.908	0.69	2.33903e-21	HoxGenes	Col11a1
1.74044e-25	-0.532189	0.628	0.805	2.83675e-21	HoxGenes	Gstm1
2.287e-25	-0.504491	0.724	0.88	3.72758e-21	HoxGenes	Id2
4.10527e-25	0.385335	0.973	0.88	6.69118e-21	HoxGenes	Hmox1
4.55377e-25	-0.315208	0.839	0.916	7.42218e-21	HoxGenes	Tpp1
4.84645e-25	0.256604	0.985	0.986	7.89922e-21	HoxGenes	Pdap1
6.44046e-25	-0.256751	0.165	0.493	1.04973e-20	HoxGenes	Col6a2
8.80702e-25	0.299284	1	0.987	1.43546e-20	HoxGenes	Hspd1
1.47749e-24	-0.450053	1	1	2.40817e-20	HoxGenes	B2m
1.48779e-24	-0.370627	0.287	0.585	2.42495e-20	HoxGenes	Sepp1
2.35362e-24	-0.422538	0.241	0.534	3.83617e-20	HoxGenes	Aldh1a1
4.67109e-24	-0.297378	0.996	0.999	7.6134e-20	HoxGenes	Capns1
5.83921e-24	-0.751836	0.341	0.587	9.51733e-20	HoxGenes	Tbx20
6.4566e-24	-0.505693	0.628	0.773	1.05236e-19	HoxGenes	Eng
6.63329e-24	-0.921969	0.425	0.659	1.08116e-19	HoxGenes	Wisp2
2.13541e-23	-0.415184	0.674	0.783	3.4805e-19	HoxGenes	Ptprb
2.509e-23	-0.335633	0.755	0.873	4.08942e-19	HoxGenes	Pam
2.54641e-23	-0.447606	0.874	0.95	4.1504e-19	HoxGenes	Sdc4
3.76274e-23	-0.445607	0.207	0.499	6.13288e-19	HoxGenes	Tcf21
5.13786e-23	-0.455541	0.448	0.67	8.3742e-19	HoxGenes	Srpx2
5.46607e-23	0.257681	0.989	0.998	8.90914e-19	HoxGenes	Snhg6
8.25872e-23	0.284709	0.996	0.991	1.34609e-18	HoxGenes	Ybx3
9.19336e-23	0.332625	0.989	0.99	1.49843e-18	HoxGenes	Dstn
1.78806e-22	-0.287832	0.693	0.82	2.91436e-18	HoxGenes	Tspan17
2.36757e-22	-0.695387	0.582	0.752	3.85891e-18	HoxGenes	Serpine2
2.69407e-22	-0.406115	0.199	0.506	4.39107e-18	HoxGenes	Sorbs2
2.99801e-22	-1.03425	0.625	0.76	4.88646e-18	HoxGenes	Tnnt2
1.17554e-21	-1.39422	0.981	0.979	1.91601e-17	HoxGenes	Ankrd1
1.29565e-21	0.366132	1	0.984	2.11177e-17	HoxGenes	Tpm2
1.33153e-21	0.422499	1	0.98	2.17025e-17	HoxGenes	Lox
1.33173e-21	-0.344736	0.996	0.995	2.17059e-17	HoxGenes	Tspo
1.35914e-21	-0.365792	0.218	0.497	2.21526e-17	HoxGenes	Frzb
1.72005e-21	-0.272669	0.774	0.88	2.8035e-17	HoxGenes	Gstm5
2.64284e-21	-0.307717	0.536	0.722	4.30757e-17	HoxGenes	Smad6
4.8382e-21	-0.317522	0.977	0.976	7.88579e-17	HoxGenes	S100a13
4.86695e-21	-0.333686	0.146	0.442	7.93265e-17	HoxGenes	Col18a1
5.69987e-21	0.254586	0.916	0.738	9.29022e-17	HoxGenes	Pcdh19
5.90777e-21	-0.260073	0.981	0.988	9.62907e-17	HoxGenes	Map1lc3a
6.23545e-21	0.260418	1	1	1.01632e-16	HoxGenes	Tmsb4x
8.50187e-21	-0.583238	0.268	0.543	1.38572e-16	HoxGenes	Dcn
9.70352e-21	-0.326491	1	0.999	1.58158e-16	HoxGenes	Prdx5
1.20206e-20	-0.389379	0.992	0.998	1.95925e-16	HoxGenes	Tmem59
1.83807e-20	-0.278445	0.981	0.994	2.99586e-16	HoxGenes	Rabac1
2.21794e-20	0.254921	0.958	0.772	3.61502e-16	HoxGenes	Prrx1
2.35095e-20	0.324259	0.981	0.922	3.83182e-16	HoxGenes	Nrp1
2.58958e-20	0.418315	0.981	0.927	4.22076e-16	HoxGenes	Plpp1
3.09202e-20	0.290506	0.655	0.376	5.03969e-16	HoxGenes	Pappa
3.85109e-20	-0.262069	0.977	0.983	6.2769e-16	HoxGenes	Tmem160
4.77554e-20	-0.320598	0.985	0.995	7.78366e-16	HoxGenes	Cpe
5.81969e-20	-0.32656	0.87	0.919	9.48552e-16	HoxGenes	Glmp
1.24767e-19	-0.575549	0.912	0.934	2.03358e-15	HoxGenes	Lbh
2.32506e-19	0.340552	0.969	0.934	3.78962e-15	HoxGenes	Plaur
2.55738e-19	-0.528847	0.372	0.606	4.16827e-15	HoxGenes	Ptx3
3.15028e-19	0.344166	0.92	0.812	5.13465e-15	HoxGenes	Tfpi
3.74872e-19	-0.434519	1	1	6.11004e-15	HoxGenes	Tagln2
3.78541e-19	0.355554	0.989	0.964	6.16984e-15	HoxGenes	Tnc
4.89596e-19	-0.613086	0.969	0.967	7.97993e-15	HoxGenes	Itgb5
5.42543e-19	0.335831	0.996	0.99	8.8429e-15	HoxGenes	Tuba1b
5.62111e-19	-0.285465	0.996	1	9.16185e-15	HoxGenes	Laptm4a
1.01482e-18	0.333161	1	0.999	1.65406e-14	HoxGenes	Hsp90b1
1.07633e-18	-0.25547	0.962	0.978	1.75431e-14	HoxGenes	Ergic3
1.34651e-18	-0.31376	0.287	0.533	2.19468e-14	HoxGenes	Sfrp1
1.61899e-18	0.368825	1	0.981	2.63879e-14	HoxGenes	Col1a1
1.70955e-18	-0.515247	0.613	0.756	2.7864e-14	HoxGenes	Mustn1
1.96325e-18	-0.389979	0.954	0.973	3.19991e-14	HoxGenes	Lmo4
2.40953e-18	0.334012	0.973	0.852	3.9273e-14	HoxGenes	Ncam1
2.88704e-18	-0.26545	0.1	0.367	4.70558e-14	HoxGenes	Scx
6.60703e-18	-0.437638	0.885	0.933	1.07688e-13	HoxGenes	Myl12b
7.03718e-18	0.373016	0.996	0.964	1.14699e-13	HoxGenes	Myl9
7.13956e-18	0.536655	0.644	0.39	1.16368e-13	HoxGenes	Actg2
7.2725e-18	-0.255296	0.571	0.749	1.18534e-13	HoxGenes	H2-K1
9.14537e-18	0.34723	0.962	0.907	1.4906e-13	HoxGenes	Ngf
9.6866e-18	-0.351923	0.517	0.686	1.57882e-13	HoxGenes	Spry1
1.10949e-17	-0.274419	0.801	0.903	1.80836e-13	HoxGenes	Lxn
1.13404e-17	-0.318	0.874	0.919	1.84837e-13	HoxGenes	Ctsa
1.64413e-17	0.363483	1	0.983	2.67976e-13	HoxGenes	Anxa1
1.89302e-17	-0.476657	0.659	0.74	3.08543e-13	HoxGenes	Tmem45a
2.15767e-17	-0.250387	0.985	0.995	3.51679e-13	HoxGenes	H3f3a
2.16324e-17	-0.322089	0.295	0.541	3.52587e-13	HoxGenes	Gpnmb
3.8124e-17	0.297823	0.985	0.907	6.21384e-13	HoxGenes	Loxl2
4.00669e-17	0.258233	0.927	0.809	6.5305e-13	HoxGenes	Mthfd2
4.46404e-17	-0.381825	0.364	0.602	7.27594e-13	HoxGenes	Plscr2
5.96337e-17	0.289792	0.904	0.713	9.7197e-13	HoxGenes	Fabp5
6.2131e-17	-0.318406	0.977	0.987	1.01267e-12	HoxGenes	Arpc3
6.41409e-17	-0.265422	0.567	0.733	1.04543e-12	HoxGenes	Msi2
1.57104e-16	-1.10555	0.904	0.907	2.56064e-12	HoxGenes	Rbp1
1.70872e-16	-0.28308	0.441	0.655	2.78505e-12	HoxGenes	Gjb3
2.06533e-16	0.279381	1	1	3.36628e-12	HoxGenes	Calr
2.37687e-16	-0.30938	0.203	0.456	3.87406e-12	HoxGenes	Dkk3
2.49274e-16	-0.252473	0.996	0.998	4.06291e-12	HoxGenes	H2afj
5.95528e-16	-0.344172	0.693	0.8	9.70651e-12	HoxGenes	Ass1
8.94732e-16	-0.297027	0.126	0.365	1.45832e-11	HoxGenes	Fxyd6
1.64609e-15	-0.446607	0.992	0.986	2.68297e-11	HoxGenes	Cryab
1.78236e-15	-0.252459	0.927	0.935	2.90506e-11	HoxGenes	Pmm1
3.31596e-15	-0.308114	0.962	0.967	5.40468e-11	HoxGenes	Lamp2
4.38396e-15	0.395073	0.996	0.994	7.14542e-11	HoxGenes	Hspa5
4.91242e-15	-0.325805	0.992	0.998	8.00675e-11	HoxGenes	Map1lc3b
9.4223e-15	0.294219	0.923	0.864	1.53574e-10	HoxGenes	Raph1
1.08383e-14	-0.271031	0.054	0.278	1.76653e-10	HoxGenes	Bmp4
1.3294e-14	-0.290868	0.981	0.992	2.16679e-10	HoxGenes	Atp6v0b
1.61325e-14	0.289899	0.9	0.748	2.62943e-10	HoxGenes	Fgf2
2.12846e-14	0.377646	0.939	0.809	3.46918e-10	HoxGenes	Sdpr
2.23427e-14	-0.383975	0.751	0.809	3.64163e-10	HoxGenes	Creg1
2.59634e-14	-0.348106	0.966	0.981	4.23178e-10	HoxGenes	Taldo1
2.76262e-14	-0.273085	0.808	0.901	4.50279e-10	HoxGenes	S100a1
3.80101e-14	-0.367939	1	1	6.19527e-10	HoxGenes	Cd63
5.1843e-14	-0.415893	0.414	0.584	8.44988e-10	HoxGenes	Gdf6
7.7002e-14	-0.327238	0.211	0.44	1.25506e-09	HoxGenes	Itga3
8.76293e-14	-0.331964	0.87	0.893	1.42827e-09	HoxGenes	Aebp1
1.14163e-13	-0.606554	0.874	0.913	1.86074e-09	HoxGenes	Vamp5
1.22738e-13	-0.293937	0.655	0.726	2.00051e-09	HoxGenes	Emilin1
1.96563e-13	-0.383022	0.985	0.98	3.20379e-09	HoxGenes	Jund
1.98238e-13	-0.264628	0.843	0.891	3.23108e-09	HoxGenes	Efhd2
2.0164e-13	0.308756	0.755	0.534	3.28652e-09	HoxGenes	Ccl7
2.5929e-13	-0.277823	0.969	0.984	4.22617e-09	HoxGenes	Zbtb20
3.4581e-13	-0.286538	0.992	0.99	5.63636e-09	HoxGenes	Atp6v1f
4.31816e-13	-1.73579	0.946	0.94	7.03817e-09	HoxGenes	Mgp
5.80201e-13	-0.323236	1	0.999	9.4567e-09	HoxGenes	Timp2
7.32134e-13	0.356492	0.996	0.994	1.19331e-08	HoxGenes	Gsto1
7.61407e-13	-0.689365	0.95	0.928	1.24102e-08	HoxGenes	Ckb
1.55791e-12	-0.296313	0.966	0.977	2.53924e-08	HoxGenes	Psap
2.08495e-12	-0.362687	1	1	3.39826e-08	HoxGenes	Malat1
2.10961e-12	-0.404452	0.506	0.674	3.43846e-08	HoxGenes	Nrep
2.50086e-12	0.358367	0.966	0.914	4.07615e-08	HoxGenes	Fhl1
2.78779e-12	-0.299983	0.969	0.953	4.54382e-08	HoxGenes	Fxyd5
3.08885e-12	-0.290973	0.728	0.815	5.03451e-08	HoxGenes	Ypel3
5.19619e-12	0.332482	1	1	8.46927e-08	HoxGenes	Thbs1
5.27239e-12	-0.26454	0.989	0.988	8.59347e-08	HoxGenes	Ifitm2
7.4565e-12	0.289554	1	0.974	1.21533e-07	HoxGenes	Col1a2
7.91639e-12	-0.282299	0.966	0.973	1.29029e-07	HoxGenes	Capg
8.12772e-12	0.287661	0.958	0.913	1.32474e-07	HoxGenes	Nupr1
1.22716e-11	-0.269788	0.881	0.872	2.00015e-07	HoxGenes	Hexa
1.98092e-11	-0.352788	0.533	0.671	3.2287e-07	HoxGenes	Adm
9.60765e-11	-0.2849	0.701	0.74	1.56595e-06	HoxGenes	Angptl2
1.03002e-10	-0.270656	0.119	0.306	1.67882e-06	HoxGenes	Serping1
1.19788e-10	-0.314606	0.912	0.902	1.95243e-06	HoxGenes	Mxra8
5.51868e-10	-0.46143	0.874	0.888	8.9949e-06	HoxGenes	Pdlim2
5.74277e-10	-0.284653	0.935	0.952	9.36014e-06	HoxGenes	Hes1
1.01232e-09	-0.267549	0.996	0.969	1.64998e-05	HoxGenes	Emp3
1.05171e-09	-0.260144	0.774	0.812	1.71417e-05	HoxGenes	Scarb2
1.17583e-09	-0.274498	1	0.999	1.91649e-05	HoxGenes	Dbi
1.51569e-09	0.259966	0.992	0.994	2.47042e-05	HoxGenes	Manf
2.18033e-09	-0.404932	0.977	0.983	3.55372e-05	HoxGenes	Hist1h2bc
2.31521e-09	-1.89368	0.736	0.779	3.77356e-05	HoxGenes	Clu
2.34759e-09	-0.397138	0.533	0.66	3.82633e-05	HoxGenes	Thy1
2.80625e-09	-0.253128	0.613	0.702	4.5739e-05	HoxGenes	Slco2a1
2.83209e-09	-0.941748	0.41	0.547	4.61602e-05	HoxGenes	Igfbp2
3.08306e-09	-0.609452	0.87	0.849	5.02509e-05	HoxGenes	Cystm1
3.70197e-09	-0.391074	0.211	0.371	6.03384e-05	HoxGenes	Ccl17
5.54698e-09	-0.492772	0.785	0.849	9.04102e-05	HoxGenes	Tinagl1
8.84027e-09	-0.263161	0.617	0.73	0.000144088	HoxGenes	Klhdc8a
4.42812e-08	-0.279568	0.115	0.267	0.000721739	HoxGenes	Asb5
6.64245e-08	-0.550817	0.77	0.82	0.00108265	HoxGenes	Cxcl12
1.29145e-07	-0.257796	0.943	0.929	0.00210493	HoxGenes	Tubb2a
1.3306e-07	-0.315811	0.835	0.895	0.00216875	HoxGenes	Hist1h1c
2.5339e-07	-0.30574	0.931	0.91	0.00413	HoxGenes	Prdx4
3.65299e-07	-1.10306	0.49	0.601	0.005954	HoxGenes	Ly6a
9.19548e-07	-0.291833	0.138	0.269	0.0149877	HoxGenes	Pdlim3
1.18279e-06	-0.265273	0.996	0.979	0.0192783	HoxGenes	Fstl1
1.43953e-06	-0.296259	0.203	0.34	0.0234628	HoxGenes	Perp
1.47603e-06	-0.376333	0.368	0.507	0.0240578	HoxGenes	Edn1
1.55847e-06	-0.269813	0.996	0.998	0.0254015	HoxGenes	Ubb
1.76694e-06	-0.280917	0.36	0.467	0.0287993	HoxGenes	Olfml3
2.13862e-06	-0.250783	0.843	0.834	0.0348574	HoxGenes	Ahnak2
3.16312e-06	-0.266789	0.356	0.471	0.0515557	HoxGenes	Serpinb9b
4.19133e-06	-0.84004	0.923	0.905	0.0683145	HoxGenes	Ctla2a
6.04105e-06	-0.270129	1	1	0.0984631	HoxGenes	Fth1
1.03701e-05	-0.283709	0.375	0.501	0.169023	HoxGenes	Gadd45a
3.92692e-05	-0.284098	0.992	0.985	0.640048	HoxGenes	Col4a1
4.67641e-05	-0.689067	0.238	0.34	0.762209	HoxGenes	Esm1
7.03649e-05	-0.77833	0.249	0.34	1	HoxGenes	Spint2
9.04846e-05	-0.262686	0.31	0.42	1	HoxGenes	Col6a3
0.000136513	-0.256949	0.31	0.405	1	HoxGenes	Peg3
0.000149424	-0.280628	0.969	0.949	1	HoxGenes	Csrp2
0.00030696	-0.292434	0.989	0.985	1	HoxGenes	Sat1
0.000319474	-0.653396	0.364	0.449	1	HoxGenes	Gdf15
0.000439921	-0.463298	0.548	0.592	1	HoxGenes	Ldhb
0.000613849	-1.12396	0.303	0.388	1	HoxGenes	Krt18
0.000680489	-0.312139	0.82	0.75	1	HoxGenes	Fam101b
0.00436823	-0.779362	0.586	0.581	1	HoxGenes	Igfbp4
0.00506514	-0.292291	0.766	0.769	1	HoxGenes	Jag1
0.0107588	-0.30557	0.946	0.836	1	HoxGenes	Ptgis
0.0116564	-0.296342	0.893	0.894	1	HoxGenes	Lgals3
0.0119068	-0.330244	0.739	0.693	1	HoxGenes	Tubb3
0.0143806	-0.490821	0.276	0.337	1	HoxGenes	Crct1
0.0144692	-0.581309	0.314	0.373	1	HoxGenes	Sfn
0.0195786	-0.289376	0.245	0.299	1	HoxGenes	Sprr1a
0.0278968	-0.4176	0.421	0.416	1	HoxGenes	Top2a
0.034183	-1.08063	0.207	0.256	1	HoxGenes	Krt8
0.0408532	-0.931195	0.954	0.935	1	HoxGenes	Spp1
0.0582594	-0.281285	0.467	0.458	1	HoxGenes	Gm2115
0.102071	-0.425262	0.828	0.726	1	HoxGenes	Postn
0.122306	-0.461614	0.502	0.449	1	HoxGenes	Il11
0.224904	-0.261138	0.379	0.302	1	HoxGenes	Il1rl1
0.403197	-0.459642	0.985	0.99	1	HoxGenes	Tsc22d1
0.616544	-0.357573	0.992	0.96	1	HoxGenes	Mt1
0.916014	-0.62409	0.958	0.913	1	HoxGenes	Ly6e

## Sheet: Prolif+HoxWt 
p_val	avg_logFC	pct.1	pct.2	p_val_adj	cluster	gene
2.09991e-46	0.500746	0.819	0.241	3.42264e-42	Prolif+HoxWt	Sgol1
2.15709e-44	0.272653	0.695	0.145	3.51585e-40	Prolif+HoxWt	Sgol2a
2.94693e-43	0.330147	0.714	0.173	4.8032e-39	Prolif+HoxWt	Aurkb
3.76568e-42	0.283193	0.714	0.168	6.13768e-38	Prolif+HoxWt	Kif20b
1.23171e-40	0.276771	0.714	0.166	2.00756e-36	Prolif+HoxWt	Fbxo5
2.18054e-39	0.547344	0.79	0.248	3.55407e-35	Prolif+HoxWt	Mki67
2.7121e-39	0.278734	0.676	0.158	4.42044e-35	Prolif+HoxWt	Kif11
1.62445e-37	0.30057	0.648	0.14	2.64768e-33	Prolif+HoxWt	Nusap1
3.26209e-37	0.689174	0.838	0.365	5.31688e-33	Prolif+HoxWt	Prc1
3.51021e-36	0.684116	0.933	0.51	5.7213e-32	Prolif+HoxWt	Hmgb2
4.18246e-36	0.923596	0.829	0.375	6.81699e-32	Prolif+HoxWt	Top2a
3.17556e-34	0.414071	0.8	0.286	5.17584e-30	Prolif+HoxWt	Aurka
3.42938e-34	0.285572	0.714	0.212	5.58955e-30	Prolif+HoxWt	Ect2
4.67679e-34	0.256534	0.667	0.184	7.6227e-30	Prolif+HoxWt	Mis18bp1
1.23314e-32	0.320842	0.724	0.219	2.0099e-28	Prolif+HoxWt	Plk1
1.3033e-32	0.307507	0.762	0.237	2.12424e-28	Prolif+HoxWt	Pbk
1.45273e-32	0.289412	0.695	0.208	2.3678e-28	Prolif+HoxWt	Ckap2l
1.53804e-32	0.295609	0.695	0.205	2.50685e-28	Prolif+HoxWt	Kif23
2.66194e-32	0.490468	0.79	0.298	4.3387e-28	Prolif+HoxWt	Ccna2
2.86822e-32	0.409678	0.848	0.333	4.67492e-28	Prolif+HoxWt	Cdca8
1.00346e-31	0.255144	0.695	0.204	1.63554e-27	Prolif+HoxWt	Kif4
1.40048e-31	0.406538	0.838	0.377	2.28264e-27	Prolif+HoxWt	Spc25
3.43803e-31	0.318389	0.733	0.268	5.60365e-27	Prolif+HoxWt	Incenp
5.53464e-29	0.616649	0.876	0.563	9.02091e-25	Prolif+HoxWt	Fam111a
5.68215e-29	0.3808	0.743	0.259	9.26134e-25	Prolif+HoxWt	Cenpe
5.9236e-29	0.877041	0.838	0.435	9.65487e-25	Prolif+HoxWt	2810417H13Rik
1.0931e-28	0.368044	0.771	0.283	1.78164e-24	Prolif+HoxWt	Tk1
2.84633e-28	0.252465	0.781	0.324	4.63924e-24	Prolif+HoxWt	Mis18a
6.35681e-28	0.576193	0.876	0.553	1.0361e-23	Prolif+HoxWt	Cdk1
8.25778e-28	0.388493	0.886	0.541	1.34594e-23	Prolif+HoxWt	Hjurp
2.31485e-26	0.488426	0.743	0.298	3.77298e-22	Prolif+HoxWt	Cenpf
1.43519e-25	0.263343	0.686	0.252	2.33921e-21	Prolif+HoxWt	Arhgap11a
2.09169e-25	0.294337	0.638	0.208	3.40924e-21	Prolif+HoxWt	Fam64a
1.54467e-24	0.420419	0.876	0.558	2.51765e-20	Prolif+HoxWt	Dbf4
2.08552e-24	0.547145	0.867	0.587	3.39918e-20	Prolif+HoxWt	Smc2
2.25848e-24	0.466502	0.981	0.882	3.68109e-20	Prolif+HoxWt	Lsm3
3.10846e-24	-1.03954	0.8	0.937	5.06648e-20	Prolif+HoxWt	Cd9
4.7603e-24	0.351714	0.914	0.654	7.75882e-20	Prolif+HoxWt	Usp1
6.16376e-24	0.342414	0.838	0.467	1.00463e-19	Prolif+HoxWt	Gmnn
8.40355e-24	0.343103	0.733	0.286	1.36969e-19	Prolif+HoxWt	Ccnb1
8.8144e-24	0.419352	0.971	0.874	1.43666e-19	Prolif+HoxWt	Tipin
1.20823e-23	0.493183	0.914	0.722	1.96929e-19	Prolif+HoxWt	Cks2
1.96674e-23	0.50552	0.943	0.843	3.2056e-19	Prolif+HoxWt	Dek
3.49851e-23	0.672598	0.857	0.533	5.70223e-19	Prolif+HoxWt	Ube2c
4.45306e-23	0.276596	0.81	0.4	7.25805e-19	Prolif+HoxWt	Atad2
5.3478e-23	0.384935	0.79	0.432	8.71637e-19	Prolif+HoxWt	Anln
8.44483e-23	0.449036	0.933	0.649	1.37642e-18	Prolif+HoxWt	Nt5dc2
1.14934e-22	0.63954	0.895	0.638	1.87332e-18	Prolif+HoxWt	Rrm2
1.58011e-22	0.451609	0.857	0.507	2.57543e-18	Prolif+HoxWt	Tpx2
1.8972e-22	0.265928	0.81	0.368	3.09225e-18	Prolif+HoxWt	Hoxc6
2.18375e-22	0.487503	0.914	0.751	3.55929e-18	Prolif+HoxWt	Smc4
3.2201e-22	0.422686	0.8	0.346	5.24845e-18	Prolif+HoxWt	Maf
4.46758e-22	0.262444	0.886	0.543	7.28171e-18	Prolif+HoxWt	Topbp1
1.48196e-21	0.313035	0.61	0.197	2.41545e-17	Prolif+HoxWt	Wt1
3.1912e-21	0.630984	0.838	0.532	5.20134e-17	Prolif+HoxWt	Birc5
6.93101e-21	-0.799987	0.981	0.996	1.12968e-16	Prolif+HoxWt	Ctsd
1.6709e-20	0.35374	0.876	0.652	2.7234e-16	Prolif+HoxWt	Lmnb1
2.87959e-20	0.392395	0.99	0.92	4.69344e-16	Prolif+HoxWt	H2afz
3.72111e-20	0.380626	0.79	0.394	6.06503e-16	Prolif+HoxWt	Cdca3
4.05476e-20	0.269443	0.762	0.352	6.60885e-16	Prolif+HoxWt	Racgap1
6.26543e-20	0.422984	0.962	0.824	1.0212e-15	Prolif+HoxWt	Mthfd2
9.94858e-20	-1.01221	0.99	0.999	1.62152e-15	Prolif+HoxWt	Ctsl
1.04665e-19	0.330965	0.8	0.393	1.70593e-15	Prolif+HoxWt	Hoxc8
1.36769e-19	0.301187	1	0.997	2.22919e-15	Prolif+HoxWt	Hnrnpab
1.38315e-19	0.272462	0.895	0.66	2.25439e-15	Prolif+HoxWt	Tcof1
1.5345e-19	0.449763	0.952	0.703	2.50108e-15	Prolif+HoxWt	Flrt2
3.30173e-19	0.512182	0.933	0.79	5.38149e-15	Prolif+HoxWt	Psat1
3.77815e-19	0.422741	1	0.9	6.15801e-15	Prolif+HoxWt	Mmd
8.99046e-19	0.379799	0.962	0.804	1.46535e-14	Prolif+HoxWt	Rrm1
2.04935e-18	0.542036	0.971	0.965	3.34023e-14	Prolif+HoxWt	Cks1b
2.90453e-18	0.313009	0.876	0.637	4.73409e-14	Prolif+HoxWt	Slc7a5
3.56299e-18	0.300667	0.895	0.738	5.80732e-14	Prolif+HoxWt	Trim59
3.96813e-18	0.276421	0.79	0.404	6.46765e-14	Prolif+HoxWt	Hoxc9
8.57338e-18	0.306269	0.952	0.86	1.39737e-13	Prolif+HoxWt	Grb10
1.31584e-17	0.255317	0.781	0.416	2.14469e-13	Prolif+HoxWt	Ckap2
1.55873e-17	0.294802	0.8	0.406	2.54058e-13	Prolif+HoxWt	Lockd
1.65497e-17	0.304636	0.924	0.743	2.69743e-13	Prolif+HoxWt	Ezh2
2.91105e-17	-0.818295	0.99	0.99	4.74472e-13	Prolif+HoxWt	Itm2b
3.4641e-17	0.325911	0.933	0.784	5.64614e-13	Prolif+HoxWt	Tmpo
9.11169e-17	-0.68852	1	1	1.48511e-12	Prolif+HoxWt	Cd63
9.85561e-17	0.321705	0.981	0.924	1.60637e-12	Prolif+HoxWt	Lsm2
1.01109e-16	-0.698561	1	0.998	1.64798e-12	Prolif+HoxWt	Cst3
1.34771e-16	0.291153	1	0.999	2.19663e-12	Prolif+HoxWt	Hmgn1
1.95247e-16	-0.414666	0.943	0.989	3.18233e-12	Prolif+HoxWt	Arpc3
2.09976e-16	-0.478186	0.99	0.997	3.4224e-12	Prolif+HoxWt	Tmem59
5.44194e-16	0.290381	0.952	0.944	8.86983e-12	Prolif+HoxWt	Cbx5
6.25422e-16	0.264289	0.943	0.769	1.01938e-11	Prolif+HoxWt	Rad21
7.16656e-16	0.263371	0.962	0.844	1.16808e-11	Prolif+HoxWt	Dctpp1
7.1858e-16	0.288351	0.924	0.733	1.17121e-11	Prolif+HoxWt	Rangap1
7.45369e-16	0.436329	0.962	0.913	1.21488e-11	Prolif+HoxWt	2700094K13Rik
1.38095e-15	0.30302	0.895	0.612	2.25081e-11	Prolif+HoxWt	Cenpw
1.4387e-15	-0.372767	1	0.999	2.34493e-11	Prolif+HoxWt	Gabarap
2.19398e-15	0.267115	0.981	0.942	3.57597e-11	Prolif+HoxWt	Lsm8
2.77303e-15	0.276687	0.99	0.964	4.51977e-11	Prolif+HoxWt	Ssrp1
6.36929e-15	0.254296	0.981	0.963	1.03813e-10	Prolif+HoxWt	Naa50
7.42041e-15	0.26294	0.971	0.892	1.20945e-10	Prolif+HoxWt	Lyar
8.3147e-15	0.285646	1	0.981	1.35521e-10	Prolif+HoxWt	Nucks1
8.56738e-15	0.272764	1	0.98	1.3964e-10	Prolif+HoxWt	Cdv3
9.70592e-15	0.252478	1	0.984	1.58197e-10	Prolif+HoxWt	Pdap1
1.43767e-14	0.263358	0.952	0.828	2.34325e-10	Prolif+HoxWt	Psip1
2.30393e-14	-0.379719	0.829	0.915	3.75517e-10	Prolif+HoxWt	Glmp
3.52566e-14	0.357499	0.895	0.553	5.74648e-10	Prolif+HoxWt	Ccl7
4.16945e-14	0.304734	1	0.991	6.79579e-10	Prolif+HoxWt	Ybx3
4.49593e-14	-0.624345	1	1	7.32791e-10	Prolif+HoxWt	Igfbp7
4.82667e-14	0.383261	0.943	0.863	7.86699e-10	Prolif+HoxWt	H2afx
7.34775e-14	-0.413172	0.99	1	1.19761e-09	Prolif+HoxWt	Lamp1
8.15904e-14	-0.326084	1	0.999	1.32984e-09	Prolif+HoxWt	Prdx2
8.39512e-14	0.363033	0.99	0.869	1.36832e-09	Prolif+HoxWt	Ncam1
9.20712e-14	-0.50792	0.362	0.64	1.50067e-09	Prolif+HoxWt	Sox9
1.20409e-13	-0.306029	0.695	0.852	1.96255e-09	Prolif+HoxWt	Atp6ap2
1.24062e-13	0.293748	0.981	0.96	2.02209e-09	Prolif+HoxWt	Dtymk
1.46194e-13	0.318035	0.971	0.908	2.38282e-09	Prolif+HoxWt	Dut
1.50057e-13	0.251122	0.981	0.948	2.44577e-09	Prolif+HoxWt	Tnrc6a
1.99469e-13	-0.319812	1	0.996	3.25114e-09	Prolif+HoxWt	Tmbim6
2.7187e-13	0.303167	0.962	0.896	4.43121e-09	Prolif+HoxWt	Prkar2a
2.8626e-13	0.282217	1	0.996	4.66574e-09	Prolif+HoxWt	1810037I17Rik
3.10029e-13	-0.267065	0.924	0.958	5.05316e-09	Prolif+HoxWt	Pet100
3.14161e-13	0.385129	0.771	0.458	5.12051e-09	Prolif+HoxWt	Cenpa
3.2582e-13	-0.477745	0.79	0.885	5.31053e-09	Prolif+HoxWt	Ecm1
3.41976e-13	0.257326	0.971	0.883	5.57387e-09	Prolif+HoxWt	Lsm5
3.53282e-13	0.284485	0.971	0.741	5.75815e-09	Prolif+HoxWt	Wnt5a
3.82455e-13	0.458077	0.962	0.652	6.23364e-09	Prolif+HoxWt	Igfbp6
4.96336e-13	0.347793	1	0.999	8.08977e-09	Prolif+HoxWt	Ptma
5.27215e-13	0.381123	1	0.978	8.59307e-09	Prolif+HoxWt	Col1a2
7.45964e-13	0.257499	0.981	0.963	1.21585e-08	Prolif+HoxWt	Kpnb1
9.00452e-13	-0.336128	1	0.997	1.46765e-08	Prolif+HoxWt	Cstb
9.96653e-13	0.321907	0.943	0.766	1.62444e-08	Prolif+HoxWt	Sh3kbp1
1.14115e-12	0.275469	1	0.997	1.85996e-08	Prolif+HoxWt	Set
1.58097e-12	0.400551	0.99	0.991	2.57683e-08	Prolif+HoxWt	Tuba1b
2.28915e-12	-0.301267	0.848	0.904	3.73109e-08	Prolif+HoxWt	Tpp1
2.62622e-12	-0.267377	0.933	0.959	4.28048e-08	Prolif+HoxWt	Atp6ap1
2.90831e-12	-0.250531	0.952	0.975	4.74025e-08	Prolif+HoxWt	Chmp2a
3.14935e-12	-0.618001	0.971	0.968	5.13312e-08	Prolif+HoxWt	Itgb5
3.2709e-12	-0.319464	0.829	0.897	5.33124e-08	Prolif+HoxWt	Tspan6
3.45596e-12	-0.328025	0.981	0.983	5.63286e-08	Prolif+HoxWt	Bcap31
4.38785e-12	0.27963	0.971	0.935	7.15176e-08	Prolif+HoxWt	Fez2
4.87884e-12	-0.506635	0.943	0.985	7.95202e-08	Prolif+HoxWt	Hist1h2bc
6.45249e-12	-0.287503	0.924	0.969	1.05169e-07	Prolif+HoxWt	Sin3b
9.30919e-12	0.282343	0.971	0.906	1.5173e-07	Prolif+HoxWt	Atf5
9.95928e-12	0.262337	1	0.984	1.62326e-07	Prolif+HoxWt	Ckap4
1.20763e-11	-0.389231	0.943	0.974	1.96832e-07	Prolif+HoxWt	Capg
1.5334e-11	-0.254334	1	0.998	2.49928e-07	Prolif+HoxWt	Capns1
1.73114e-11	-0.419459	0.257	0.556	2.82158e-07	Prolif+HoxWt	Cst6
1.73906e-11	-0.358995	0.514	0.753	2.8345e-07	Prolif+HoxWt	Angptl2
1.80373e-11	-0.363775	0.886	0.974	2.93991e-07	Prolif+HoxWt	Lamp2
1.90554e-11	-0.292744	0.4	0.637	3.10584e-07	Prolif+HoxWt	Dclk1
2.00363e-11	-0.518943	1	0.995	3.26571e-07	Prolif+HoxWt	Cd81
2.00367e-11	-0.257722	0.81	0.899	3.26578e-07	Prolif+HoxWt	Mxd4
2.34302e-11	-0.367406	0.343	0.631	3.81889e-07	Prolif+HoxWt	Col6a1
2.96199e-11	-0.316161	1	0.999	4.82775e-07	Prolif+HoxWt	Laptm4a
3.31206e-11	-0.603658	1	0.999	5.39833e-07	Prolif+HoxWt	Fn1
4.37862e-11	0.330144	1	0.991	7.13671e-07	Prolif+HoxWt	Eif4ebp1
5.62193e-11	-1.30307	1	0.996	9.16319e-07	Prolif+HoxWt	S100a4
6.59201e-11	0.729124	0.99	0.939	1.07443e-06	Prolif+HoxWt	Crip1
6.93238e-11	-0.365146	1	0.995	1.12991e-06	Prolif+HoxWt	Tspo
7.85106e-11	-0.515426	0.495	0.724	1.27964e-06	Prolif+HoxWt	Gxylt2
8.50427e-11	-0.441105	1	1	1.38611e-06	Prolif+HoxWt	B2m
1.27329e-10	-0.261136	0.914	0.927	2.07533e-06	Prolif+HoxWt	Creb3
1.36417e-10	-0.260413	1	0.997	2.22346e-06	Prolif+HoxWt	Atp5h
2.09713e-10	-0.648107	0.571	0.727	3.41812e-06	Prolif+HoxWt	Serpine2
2.19808e-10	-0.409785	0.933	0.958	3.58264e-06	Prolif+HoxWt	Grn
2.28229e-10	-0.300184	0.914	0.966	3.71991e-06	Prolif+HoxWt	Rnh1
3.40195e-10	-0.320832	0.99	1	5.54484e-06	Prolif+HoxWt	Prdx5
4.04048e-10	-0.300022	0.933	0.97	6.58558e-06	Prolif+HoxWt	Serinc3
4.7012e-10	-0.383527	0.971	0.985	7.66248e-06	Prolif+HoxWt	Litaf
4.95003e-10	-0.316076	1	0.996	8.06806e-06	Prolif+HoxWt	Map1lc3b
5.4404e-10	-0.409904	0.629	0.79	8.86731e-06	Prolif+HoxWt	Ass1
5.61149e-10	0.252214	0.933	0.829	9.14617e-06	Prolif+HoxWt	Jade1
6.84181e-10	0.334923	1	0.993	1.11515e-05	Prolif+HoxWt	Zyx
6.86891e-10	0.305051	1	0.984	1.11956e-05	Prolif+HoxWt	Col1a1
9.18565e-10	0.318903	0.543	0.266	1.49717e-05	Prolif+HoxWt	C1qtnf3
9.2951e-10	0.372824	0.962	0.878	1.51501e-05	Prolif+HoxWt	Hmga2
1.12018e-09	-0.322426	0.19	0.457	1.82579e-05	Prolif+HoxWt	Frzb
1.39239e-09	-0.257817	0.99	0.986	2.26946e-05	Prolif+HoxWt	Map1lc3a
1.50447e-09	-0.302165	0.99	0.974	2.45214e-05	Prolif+HoxWt	S100a13
1.50734e-09	-0.3684	0.962	0.975	2.45681e-05	Prolif+HoxWt	Psap
1.65428e-09	-0.661385	0.314	0.552	2.69632e-05	Prolif+HoxWt	Tbx20
1.65825e-09	-0.375605	1	0.99	2.70279e-05	Prolif+HoxWt	Crip2
1.87387e-09	-0.295018	1	0.996	3.05421e-05	Prolif+HoxWt	Ppib
2.05975e-09	0.260247	1	0.993	3.35718e-05	Prolif+HoxWt	Ranbp1
2.15915e-09	-0.46412	0.638	0.75	3.5192e-05	Prolif+HoxWt	Eng
2.34409e-09	-0.252436	0.99	0.995	3.82063e-05	Prolif+HoxWt	Cnn3
3.0687e-09	-0.341856	0.867	0.912	5.00168e-05	Prolif+HoxWt	Ctsa
3.37309e-09	0.257005	0.895	0.768	5.49779e-05	Prolif+HoxWt	Pcdh19
5.92331e-09	-0.262711	0.981	0.977	9.65441e-05	Prolif+HoxWt	Atp6v1e1
7.24647e-09	0.255973	0.962	0.827	0.00011811	Prolif+HoxWt	Rhoj
7.32536e-09	-1.07672	0.343	0.599	0.000119396	Prolif+HoxWt	Ly6a
7.50059e-09	-0.258349	0.981	0.982	0.000122252	Prolif+HoxWt	Rab11a
9.10772e-09	0.879404	0.333	0.136	0.000148447	Prolif+HoxWt	Upk1b
1.21273e-08	-0.323246	0.981	0.99	0.000197663	Prolif+HoxWt	Atp6v0b
1.24514e-08	-0.359805	0.905	0.935	0.000202945	Prolif+HoxWt	Tubb2a
1.68654e-08	-0.835752	0.457	0.62	0.000274889	Prolif+HoxWt	Wisp2
2.33002e-08	-0.275634	1	1	0.000379771	Prolif+HoxWt	Rhoc
2.78365e-08	0.327172	0.952	0.838	0.000453707	Prolif+HoxWt	Meg3
3.27393e-08	-0.257376	0.952	0.966	0.000533618	Prolif+HoxWt	Dctn3
4.72335e-08	-0.251223	0.848	0.883	0.000769859	Prolif+HoxWt	Lxn
4.82029e-08	-0.363499	0.943	0.959	0.00078566	Prolif+HoxWt	Fxyd5
5.21717e-08	0.293975	0.829	0.75	0.000850346	Prolif+HoxWt	Fabp5
5.33705e-08	-0.258749	0.524	0.705	0.000869886	Prolif+HoxWt	Fcgrt
5.80604e-08	0.259217	0.876	0.726	0.000946327	Prolif+HoxWt	Col11a1
6.46761e-08	0.297862	1	0.983	0.00105416	Prolif+HoxWt	Lox
7.56629e-08	-0.419225	1	1	0.00123323	Prolif+HoxWt	Tagln2
9.77734e-08	-0.412489	0.657	0.775	0.00159361	Prolif+HoxWt	Gstm1
1.05723e-07	-0.279022	0.286	0.504	0.00172319	Prolif+HoxWt	Gpnmb
1.12278e-07	-1.15875	0.962	0.981	0.00183001	Prolif+HoxWt	Ankrd1
1.34392e-07	-0.634164	0.448	0.608	0.00219046	Prolif+HoxWt	Igf1
1.40241e-07	-0.307002	1	0.992	0.00228579	Prolif+HoxWt	Cpe
1.76176e-07	0.289784	0.99	0.944	0.0028715	Prolif+HoxWt	Ptgs2
1.79044e-07	-0.352616	0.924	0.95	0.00291823	Prolif+HoxWt	S100a16
2.5707e-07	0.302694	0.886	0.768	0.00418998	Prolif+HoxWt	Cnn1
2.57378e-07	0.255894	0.971	0.946	0.00419501	Prolif+HoxWt	Arl6ip1
2.58359e-07	-0.319743	0.162	0.382	0.00421099	Prolif+HoxWt	Hsd11b1
2.62595e-07	0.262033	0.867	0.734	0.00428004	Prolif+HoxWt	Plac8
2.99155e-07	-0.54049	0.886	0.885	0.00487593	Prolif+HoxWt	Pdlim2
4.4219e-07	-0.354354	0.486	0.632	0.00720725	Prolif+HoxWt	Srpx2
4.57965e-07	0.292139	0.99	0.988	0.00746436	Prolif+HoxWt	Prss23
5.54196e-07	0.285915	0.924	0.87	0.00903285	Prolif+HoxWt	Cck
6.01026e-07	-0.297911	0.8	0.852	0.00979612	Prolif+HoxWt	Dusp1
8.10067e-07	-0.327433	0.229	0.456	0.0132033	Prolif+HoxWt	Sorbs2
8.55057e-07	-0.285046	0.181	0.393	0.0139366	Prolif+HoxWt	Col18a1
9.04953e-07	-0.348609	0.99	0.999	0.0147498	Prolif+HoxWt	Prdx1
2.91538e-06	-0.25888	0.238	0.423	0.0475178	Prolif+HoxWt	Sod3
3.69474e-06	-0.411423	0.924	0.914	0.0602205	Prolif+HoxWt	Prdx4
4.24654e-06	-0.315476	0.695	0.764	0.0692144	Prolif+HoxWt	Ptprb
4.38155e-06	-0.367647	0.924	0.921	0.0714149	Prolif+HoxWt	Myl12b
7.4217e-06	0.329534	0.686	0.465	0.120966	Prolif+HoxWt	Slc9a3r1
1.01069e-05	-0.256852	0.324	0.491	0.164732	Prolif+HoxWt	Sfrp1
1.21193e-05	-0.410829	0.705	0.722	0.197533	Prolif+HoxWt	Tmem45a
1.43891e-05	-0.320567	1	0.992	0.234528	Prolif+HoxWt	Ctsb
1.82367e-05	-0.359318	0.924	0.985	0.29724	Prolif+HoxWt	Crlf1
2.16825e-05	0.313844	0.867	0.787	0.353403	Prolif+HoxWt	Arhgdib
3.3421e-05	-0.287546	1	0.997	0.544728	Prolif+HoxWt	Ubb
3.79825e-05	-0.352151	0.99	0.949	0.619076	Prolif+HoxWt	Card19
4.75638e-05	-0.31705	1	0.981	0.775242	Prolif+HoxWt	Fstl1
6.69659e-05	-0.592262	0.924	0.934	1	Prolif+HoxWt	Ckb
0.00010768	-0.512506	0.829	0.856	1	Prolif+HoxWt	Cystm1
0.000133198	-0.439489	0.705	0.724	1	Prolif+HoxWt	Mustn1
0.000135604	-0.297507	0.943	0.956	1	Prolif+HoxWt	Junb
0.000169518	-0.769318	0.895	0.907	1	Prolif+HoxWt	Rbp1
0.000210205	-0.307177	0.562	0.647	1	Prolif+HoxWt	Adm
0.000274335	-0.285007	0.971	0.919	1	Prolif+HoxWt	Pcolce
0.000333794	-0.409985	0.486	0.558	1	Prolif+HoxWt	Ptx3
0.000335999	-0.26371	0.276	0.409	1	Prolif+HoxWt	Dkk3
0.000412876	-0.367836	0.943	0.955	1	Prolif+HoxWt	Csrp2
0.000480058	-0.371022	0.99	0.99	1	Prolif+HoxWt	Csrp1
0.000668846	-0.311668	0.981	0.986	1	Prolif+HoxWt	Sat1
0.00159418	-0.41649	0.962	0.939	1	Prolif+HoxWt	Plin2
0.00178505	-0.287356	0.724	0.764	1	Prolif+HoxWt	Lurap1l
0.00258744	-0.670222	0.914	0.908	1	Prolif+HoxWt	Ctla2a
0.00300599	-0.639089	0.362	0.232	1	Prolif+HoxWt	Krt8
0.00311116	-0.476658	0.81	0.808	1	Prolif+HoxWt	Cxcl12
0.00327115	-0.361647	0.371	0.485	1	Prolif+HoxWt	Edn1
0.00359962	-0.303772	0.724	0.773	1	Prolif+HoxWt	Jag1
0.00520555	-0.326043	0.238	0.344	1	Prolif+HoxWt	Ccl17
0.00562523	0.428673	0.81	0.648	1	Prolif+HoxWt	Smim1
0.00572594	-0.381871	1	0.994	1	Prolif+HoxWt	Tm4sf1
0.0061543	-0.48413	0.971	0.897	1	Prolif+HoxWt	Vamp5
0.00846621	-0.731581	0.695	0.732	1	Prolif+HoxWt	Tnnt2
0.0105053	-0.266428	0.676	0.719	1	Prolif+HoxWt	Ccnd1
0.011098	-0.309653	0.905	0.879	1	Prolif+HoxWt	Hist1h1c
0.0113067	-0.386674	0.705	0.704	1	Prolif+HoxWt	Tubb3
0.011898	-0.306146	1	0.986	1	Prolif+HoxWt	Hspb1
0.0122936	-0.808389	0.467	0.52	1	Prolif+HoxWt	Igfbp2
0.0244398	-0.298879	0.962	0.981	1	Prolif+HoxWt	Sqstm1
0.0260736	0.310245	0.857	0.734	1	Prolif+HoxWt	Atp1b1
0.029544	-0.486614	0.8	0.744	1	Prolif+HoxWt	Postn
0.0364933	-0.613144	0.257	0.322	1	Prolif+HoxWt	Esm1
0.0381889	0.560638	0.162	0.273	1	Prolif+HoxWt	Serping1
0.0532004	-0.273896	0.495	0.537	1	Prolif+HoxWt	Glipr1
0.0541578	-0.580784	0.371	0.435	1	Prolif+HoxWt	Gdf15
0.0580735	-0.380047	0.59	0.607	1	Prolif+HoxWt	Smoc2
0.07229	-0.36935	0.533	0.587	1	Prolif+HoxWt	Ldhb
0.101224	0.396824	0.571	0.488	1	Prolif+HoxWt	Ezr
0.184886	-1.45046	0.743	0.772	1	Prolif+HoxWt	Clu
0.189217	-0.256841	0.933	0.908	1	Prolif+HoxWt	F3
0.194931	-0.379242	0.99	0.988	1	Prolif+HoxWt	Tsc22d1
0.204411	-0.32969	0.295	0.323	1	Prolif+HoxWt	Il1rl1
0.247456	-0.282234	0.914	0.892	1	Prolif+HoxWt	Lgals3
0.360315	-0.288483	0.267	0.288	1	Prolif+HoxWt	Sprr1a
0.361524	-0.307542	0.857	0.886	1	Prolif+HoxWt	Cd24a
0.367079	-0.272741	0.571	0.558	1	Prolif+HoxWt	Prrx2
0.376001	-0.53335	0.438	0.464	1	Prolif+HoxWt	Il11
0.590097	-0.480989	0.371	0.313	1	Prolif+HoxWt	Spint2
0.668017	-0.434436	0.4	0.355	1	Prolif+HoxWt	Sfn
0.760668	-0.394965	0.99	0.966	1	Prolif+HoxWt	Mt1
0.787592	-0.770235	0.381	0.367	1	Prolif+HoxWt	Krt18
0.85787	-0.560417	0.971	0.925	1	Prolif+HoxWt	Gpx3
0.891052	-0.580477	0.962	0.919	1	Prolif+HoxWt	Ly6e
0.944585	-1.42529	0.962	0.937	1	Prolif+HoxWt	Spp1

## Sheet: Lung 
p_val	avg_logFC	pct.1	pct.2	p_val_adj	cluster	gene
2.48399e-49	1.36713	1	0.401	4.04865e-45	Lung	Grem1
4.18583e-39	0.987679	0.857	0.29	6.82249e-35	Lung	Nrn1
1.64545e-37	0.294623	0.75	0.189	2.68192e-33	Lung	Foxf1
2.66668e-32	0.29061	0.762	0.215	4.34642e-28	Lung	Ptges
6.92388e-32	0.538568	0.905	0.353	1.12852e-27	Lung	Col6a3
8.41775e-30	0.971562	0.964	0.796	1.37201e-25	Lung	Cxcl12
2.087e-26	-1.0133	0.679	0.925	3.40161e-22	Lung	2200002D01Rik
4.19709e-26	0.407055	0.917	0.432	6.84084e-22	Lung	Hoxa5
2.31587e-25	0.263756	0.726	0.259	3.77464e-21	Lung	Hoxa3
5.82349e-25	0.340425	0.881	0.485	9.4917e-21	Lung	Eml1
6.26359e-25	0.258925	0.917	0.449	1.0209e-20	Lung	Hoxb4
8.70903e-25	0.749004	0.952	0.627	1.41948e-20	Lung	Ptgs1
5.70052e-23	0.542328	0.964	0.546	9.29127e-19	Lung	Fgf7
1.45084e-21	0.666925	1	0.831	2.36473e-17	Lung	Id2
2.82392e-20	0.545885	0.905	0.531	4.60271e-16	Lung	Prrx2
5.51437e-20	0.409292	0.845	0.404	8.98787e-16	Lung	Has2
6.82573e-20	0.258115	0.881	0.489	1.11253e-15	Lung	Uaca
1.31573e-19	-0.422798	0.536	0.867	2.1445e-15	Lung	Jup
5.02892e-19	0.337452	0.917	0.613	8.19663e-15	Lung	Epb41l1
1.47128e-18	0.353994	0.94	0.769	2.39804e-14	Lung	Nr2f2
1.06461e-17	0.511578	0.738	0.367	1.73521e-13	Lung	Eno3
1.19863e-17	0.476266	1	0.942	1.95364e-13	Lung	Ugdh
9.20343e-17	0.691659	0.619	0.258	1.50007e-12	Lung	Mylk
1.10166e-16	0.719351	0.952	0.765	1.7956e-12	Lung	Cnn1
1.21638e-16	0.286893	0.905	0.604	1.98258e-12	Lung	Hspb6
1.37805e-16	0.340099	0.774	0.431	2.24608e-12	Lung	Osr1
5.91847e-16	-0.400748	0.56	0.841	9.64651e-12	Lung	Rbpms
1.2864e-15	0.420565	0.988	0.851	2.0967e-11	Lung	Oaf
1.73882e-15	0.267708	1	0.839	2.8341e-11	Lung	Tcf4
6.54934e-15	0.383019	0.798	0.418	1.06748e-10	Lung	Thbd
9.94651e-15	0.254758	0.857	0.534	1.62118e-10	Lung	Tspan5
1.06312e-14	-0.55555	0.917	0.926	1.73278e-10	Lung	Loxl2
1.17085e-14	0.289524	0.821	0.471	1.90837e-10	Lung	Lmod1
2.44938e-14	0.42603	0.94	0.729	3.99225e-10	Lung	Plpp3
2.57139e-14	-0.669095	1	0.986	4.19111e-10	Lung	Col4a1
2.89072e-14	-0.331439	0.024	0.464	4.71159e-10	Lung	Hoxc8
3.29699e-14	0.296664	0.774	0.416	5.37376e-10	Lung	Foxs1
4.16269e-14	-0.274775	0.607	0.844	6.78477e-10	Lung	Sulf2
5.02656e-14	-0.729959	0.667	0.869	8.19279e-10	Lung	Cystm1
5.04852e-14	-0.28948	0.036	0.473	8.22859e-10	Lung	Hoxc9
6.39135e-14	-0.466281	0.357	0.686	1.04173e-09	Lung	Mmp2
6.8979e-14	0.300838	0.583	0.242	1.12429e-09	Lung	Rasl11a
9.58076e-14	-0.343809	0.976	0.986	1.56157e-09	Lung	Fat1
9.63011e-14	-0.34887	0.048	0.471	1.56961e-09	Lung	Hoxc10
1.9199e-13	0.464369	1	0.877	3.12925e-09	Lung	Hmga2
2.04813e-13	0.332968	0.845	0.452	3.33824e-09	Lung	Grem2
3.11107e-13	0.288438	1	0.966	5.07074e-09	Lung	Foxp1
4.95565e-13	-0.498801	0.976	0.984	8.07721e-09	Lung	Col4a2
6.81696e-13	0.9923	0.714	0.427	1.1111e-08	Lung	Actg2
8.53483e-13	-0.421472	0.262	0.613	1.39109e-08	Lung	Cxcl16
1.11108e-12	0.386064	1	0.957	1.81095e-08	Lung	Id1
1.13796e-12	0.252203	0.821	0.554	1.85476e-08	Lung	Hoxb2
1.54889e-12	-0.258283	1	0.992	2.52454e-08	Lung	Rnf11
2.43236e-12	0.251773	1	1	3.96451e-08	Lung	Pfn1
2.96083e-12	-0.503912	0.857	0.927	4.82585e-08	Lung	Myl12b
3.31356e-12	-0.320151	0.726	0.864	5.40077e-08	Lung	Nuak1
3.74843e-12	-0.450457	0.631	0.793	6.10956e-08	Lung	Pcolce2
4.17727e-12	-0.306948	0.75	0.914	6.80853e-08	Lung	Ninj1
6.81304e-12	-0.312736	0.714	0.877	1.11046e-07	Lung	Cdk6
9.10641e-12	0.287894	0.952	0.85	1.48425e-07	Lung	Ltbp1
1.27312e-11	-0.592958	0.488	0.72	2.07506e-07	Lung	Gxylt2
2.04193e-11	-0.61246	1	0.999	3.32814e-07	Lung	Fn1
2.40119e-11	-0.519923	0.524	0.783	3.91369e-07	Lung	Adamts5
2.47852e-11	0.312514	0.988	0.801	4.03974e-07	Lung	Prrx1
2.62849e-11	0.324199	0.976	0.925	4.28418e-07	Lung	Cebpb
2.64726e-11	0.310036	0.845	0.666	4.31477e-07	Lung	Snai1
3.95735e-11	-0.333749	0.893	0.954	6.45009e-07	Lung	Aplp2
4.42124e-11	1.3313	0.964	0.868	7.20619e-07	Lung	Cck
4.4877e-11	-0.399697	1	1	7.3145e-07	Lung	Sparc
6.13871e-11	-0.389924	0.143	0.492	1.00055e-06	Lung	Aldh1a1
8.27091e-11	-0.438652	0.583	0.791	1.34808e-06	Lung	Ass1
9.14249e-11	0.418885	1	0.991	1.49013e-06	Lung	Id3
2.83175e-10	-0.50714	0.726	0.824	4.61547e-06	Lung	Cdkn2a
4.10888e-10	-0.496871	0.298	0.564	6.69707e-06	Lung	Gdf6
4.47656e-10	0.293901	1	0.997	7.29634e-06	Lung	Ldha
4.74998e-10	0.297228	1	0.995	7.742e-06	Lung	Nap1l1
4.89274e-10	-0.445509	0.393	0.636	7.97467e-06	Lung	Srpx2
6.28814e-10	-0.364524	0.893	0.955	1.0249e-05	Lung	Plod2
7.21447e-10	0.343819	1	0.975	1.17589e-05	Lung	Phlda1
8.03087e-10	-0.946766	0.857	0.913	1.30895e-05	Lung	Ctla2a
8.12246e-10	-0.256221	0.786	0.905	1.32388e-05	Lung	Tpd52
8.20821e-10	0.581018	0.821	0.624	1.33786e-05	Lung	Adm
8.30142e-10	-0.308549	0.631	0.768	1.35305e-05	Lung	Zdhhc2
1.08916e-09	-0.277346	0.952	0.986	1.77523e-05	Lung	Pea15a
1.26328e-09	-0.298622	0.917	0.975	2.05902e-05	Lung	Itm2c
1.78274e-09	-0.278744	0.512	0.709	2.9057e-05	Lung	Msi2
1.81275e-09	0.268411	1	1	2.95459e-05	Lung	Eif5a
1.99773e-09	-0.373401	0.976	0.989	3.2561e-05	Lung	Cyb5a
2.5481e-09	0.372122	0.988	0.963	4.15315e-05	Lung	Cks1b
2.90875e-09	-0.430995	0.905	0.955	4.74097e-05	Lung	Ccdc80
3.18546e-09	0.27732	0.595	0.298	5.19199e-05	Lung	Klk8
3.38448e-09	-1.02357	0.905	0.932	5.51636e-05	Lung	Gpx3
4.58047e-09	0.337515	1	0.826	7.46571e-05	Lung	Sdpr
4.82469e-09	-0.263349	0.833	0.895	7.86375e-05	Lung	Tspan6
9.52421e-09	-0.365565	0.262	0.557	0.000155235	Lung	Hoxb9
9.64776e-09	0.304364	0.976	0.88	0.000157249	Lung	Aebp1
9.75166e-09	-0.33635	0.738	0.886	0.000158942	Lung	Ctsh
1.17378e-08	-0.689341	0.893	0.927	0.000191314	Lung	Cd9
1.24042e-08	-0.275667	0.869	0.909	0.000202175	Lung	Creb3l2
1.32426e-08	0.2578	0.976	0.879	0.000215841	Lung	Hk2
1.75789e-08	-0.365694	0.976	0.985	0.000286518	Lung	Litaf
1.84954e-08	-0.402298	0.274	0.544	0.000301457	Lung	Pmaip1
1.97241e-08	0.472367	0.917	0.733	0.000321483	Lung	Plac8
1.98377e-08	-0.617682	0.798	0.853	0.000323334	Lung	Col8a1
2.16593e-08	0.257338	0.988	0.895	0.000353025	Lung	Hmox1
2.28896e-08	0.288159	1	0.925	0.000373078	Lung	Itga5
2.30368e-08	0.267812	0.94	0.912	0.000375478	Lung	Dut
4.18232e-08	-0.339181	0.619	0.809	0.000681677	Lung	Arhgdib
5.53002e-08	-0.262709	0.226	0.518	0.000901338	Lung	Ezr
5.81029e-08	-0.252573	0.452	0.706	0.000947018	Lung	Tgfb2
6.2246e-08	-0.718226	0.905	0.935	0.00101455	Lung	Ckb
6.97507e-08	0.52697	0.679	0.456	0.00113687	Lung	2810417H13Rik
7.45348e-08	0.342337	1	0.99	0.00121484	Lung	Tuba1b
8.50046e-08	-0.325009	0.762	0.842	0.00138549	Lung	Pmp22
8.90667e-08	-0.420393	0.631	0.777	0.0014517	Lung	Fam101b
1.20106e-07	-0.760169	1	0.987	0.0019576	Lung	Tsc22d1
1.20214e-07	0.485411	1	0.936	0.00195937	Lung	Mgp
1.24141e-07	-0.409965	0.321	0.565	0.00202338	Lung	Plscr2
1.26664e-07	-0.632481	0.607	0.721	0.00206449	Lung	Serpine2
1.32094e-07	-0.308105	0.464	0.674	0.002153	Lung	Cdkn2b
1.37438e-07	-0.662618	0.345	0.545	0.0022401	Lung	Tbx20
1.64682e-07	0.433878	1	0.997	0.00268415	Lung	Timp1
1.82935e-07	0.278133	1	0.997	0.00298165	Lung	Ran
1.90019e-07	-0.570202	0.5	0.658	0.00309712	Lung	Tmem176b
1.90139e-07	-0.298862	0.988	0.98	0.00309908	Lung	Zbtb20
2.35713e-07	-0.293868	0.512	0.719	0.00384188	Lung	Klhdc8a
2.51622e-07	-0.315838	0.298	0.533	0.00410119	Lung	Sepp1
2.52316e-07	0.258821	0.845	0.64	0.0041125	Lung	Cd248
2.98698e-07	0.393535	0.988	0.945	0.00486848	Lung	Ptgs2
3.02895e-07	-0.626329	1	0.989	0.00493689	Lung	Itm2b
4.27698e-07	-0.503535	0.405	0.622	0.00697104	Lung	Smoc2
5.43715e-07	-0.463875	1	0.995	0.00886201	Lung	Cd81
5.43801e-07	0.288389	0.929	0.77	0.00886341	Lung	Mfap5
6.08373e-07	0.31303	1	0.969	0.00991588	Lung	Myl9
6.61401e-07	0.278867	0.857	0.666	0.0107802	Lung	Igfbp6
7.53005e-07	0.268724	1	0.974	0.0122732	Lung	Rras2
8.49432e-07	0.405403	0.976	0.905	0.0138449	Lung	F3
1.07388e-06	-0.277222	0.976	0.983	0.0175031	Lung	Cd151
1.39963e-06	-0.415768	0.345	0.543	0.0228125	Lung	Cst6
1.48205e-06	-0.520355	1	0.984	0.024156	Lung	Lox
1.49844e-06	0.388713	0.75	0.546	0.024423	Lung	Birc5
1.63012e-06	-0.485372	0.881	0.903	0.0265693	Lung	Col3a1
1.86817e-06	-0.3529	0.631	0.769	0.0304493	Lung	Zfp36l1
1.9024e-06	-0.317117	1	0.996	0.0310073	Lung	Tmem59
2.02993e-06	0.307942	0.976	0.904	0.0330857	Lung	Mmd
2.30932e-06	-0.250215	1	0.997	0.0376397	Lung	Pmepa1
2.38201e-06	-0.456729	0.976	0.988	0.0388244	Lung	Hspb1
2.58253e-06	-0.498875	1	1	0.0420926	Lung	Igfbp7
2.64999e-06	-0.649645	0.69	0.754	0.0431922	Lung	Postn
3.69354e-06	-0.277239	1	0.989	0.060201	Lung	Atp6v1f
4.1759e-06	-0.27855	0.988	0.964	0.068063	Lung	Lamp2
5.08789e-06	-0.384279	1	0.958	0.0829275	Lung	Emp1
5.13504e-06	-0.319038	0.167	0.377	0.083696	Lung	Hsd11b1
6.04234e-06	0.253245	0.5	0.283	0.098484	Lung	Mki67
6.56312e-06	0.269254	1	0.986	0.106972	Lung	Tpm2
6.96177e-06	-0.299505	0.095	0.325	0.11347	Lung	Perp
8.43752e-06	-0.307894	1	0.993	0.137523	Lung	Ctgf
9.39283e-06	0.332453	0.726	0.551	0.153094	Lung	Ube2c
9.44819e-06	0.301377	0.738	0.571	0.153996	Lung	Cdk1
1.07654e-05	0.271281	0.94	0.916	0.175465	Lung	2700094K13Rik
1.09305e-05	-0.402008	0.667	0.776	0.178156	Lung	Jag1
1.20384e-05	-0.295723	0.19	0.402	0.196214	Lung	Itga3
1.25032e-05	0.254739	1	0.999	0.20379	Lung	Ncl
1.54851e-05	-0.261968	0.976	0.989	0.252392	Lung	Mfge8
1.84793e-05	-0.759073	0.929	0.923	0.301194	Lung	Ly6e
1.87443e-05	-0.286652	0.5	0.659	0.305513	Lung	Spry1
2.07749e-05	0.262071	0.762	0.601	0.33861	Lung	Smc2
2.39522e-05	-0.29851	0.274	0.445	0.390397	Lung	Frzb
2.61652e-05	-0.465013	0.952	0.953	0.426466	Lung	Card19
2.63982e-05	-0.312854	0.238	0.45	0.430265	Lung	Sorbs2
3.12557e-05	-0.478417	0.571	0.715	0.509437	Lung	Tubb3
3.43879e-05	-0.344463	1	0.982	0.560489	Lung	Fstl1
3.69534e-05	-0.307196	0.893	0.887	0.602303	Lung	H2-D1
5.20045e-05	-0.256103	0.988	0.991	0.847622	Lung	Crip2
6.17208e-05	-0.51119	1	0.994	1	Lung	Ctsd
7.42174e-05	-0.254548	0.964	0.954	1	Lung	Unc5b
7.91921e-05	-0.352073	0.155	0.348	1	Lung	Ccl17
8.69877e-05	-0.334233	0.286	0.457	1	Lung	Sox11
0.000125048	-1.00592	0.94	0.904	1	Lung	Rbp1
0.000129388	-1.07929	1	0.978	1	Lung	Ankrd1
0.000131513	-0.371316	0.5	0.623	1	Lung	Sox9
0.000140595	-0.258475	0.643	0.742	1	Lung	Nes
0.000213152	-0.328623	0.476	0.598	1	Lung	Gas6
0.000226834	-0.293312	0.393	0.526	1	Lung	Tmem176a
0.000454992	-0.39689	0.976	0.938	1	Lung	Plin2
0.000457575	-0.307174	0.821	0.794	1	Lung	Creg1
0.000469232	-0.284395	0.512	0.611	1	Lung	Col6a1
0.000501536	-0.368945	0.893	0.88	1	Lung	Hist1h1c
0.000524867	-0.30658	0.905	0.922	1	Lung	Ivns1abp
0.000596472	-0.28461	0.702	0.763	1	Lung	Cotl1
0.000670783	0.266692	0.929	0.895	1	Lung	Cthrc1
0.000791077	-0.349691	0.69	0.723	1	Lung	Tmem45a
0.000897223	-0.584811	0.405	0.524	1	Lung	Igfbp2
0.000987687	-0.252736	0.238	0.384	1	Lung	Col18a1
0.00105458	-0.696267	0.179	0.33	1	Lung	Spint2
0.0010817	-0.356133	1	0.987	1	Lung	Prss23
0.00123565	-0.441978	1	0.999	1	Lung	Wbp5
0.00178403	-0.277239	0.952	0.982	1	Lung	Sqstm1
0.002018	-0.268381	1	0.978	1	Lung	Crlf1
0.00238016	-0.2583	0.345	0.45	1	Lung	Olfml3
0.00250715	-0.290123	0.845	0.876	1	Lung	Uchl1
0.00287128	-0.433007	0.488	0.589	1	Lung	Ldhb
0.00290011	-0.266811	0.94	0.889	1	Lung	H1f0
0.0030035	-0.335815	1	0.98	1	Lung	Hist1h2bc
0.00301556	-0.278106	0.988	0.986	1	Lung	Sat1
0.00313188	-0.288867	0.976	0.96	1	Lung	Hbegf
0.00341692	-0.425592	0.917	0.903	1	Lung	Vamp5
0.00494015	0.281808	0.619	0.544	1	Lung	Hmgb2
0.00528758	-0.285643	0.345	0.485	1	Lung	Edn1
0.00553726	-0.40361	0.976	0.967	1	Lung	Itgb5
0.00840035	-0.673111	1	0.998	1	Lung	Ctsl
0.0101866	-0.323265	0.952	0.927	1	Lung	Lbh
0.012866	-0.364722	0.952	0.854	1	Lung	Ptgis
0.0150337	-0.548183	0.333	0.437	1	Lung	Gdf15
0.0162017	-0.313801	0.19	0.294	1	Lung	Sprr1a
0.0205151	-0.277541	0.976	0.952	1	Lung	Csrp2
0.022759	-0.342565	0.798	0.761	1	Lung	Gstm1
0.0277755	-0.533939	0.274	0.366	1	Lung	Sfn
0.0361783	-0.315419	0.238	0.327	1	Lung	Il1rl1
0.0673595	-0.403311	1	0.996	1	Lung	Ngfrap1
0.0976138	-0.316364	0.917	0.878	1	Lung	Ncam1
0.106757	-0.754602	0.75	0.727	1	Lung	Tnnt2
0.108913	-1.00923	0.298	0.374	1	Lung	Krt18
0.154706	-0.320409	0.976	0.941	1	Lung	Crip1
0.215062	-0.978757	0.631	0.571	1	Lung	Ly6a
0.220635	-0.275506	0.976	0.97	1	Lung	Sox4
0.254168	-0.290368	0.464	0.428	1	Lung	Tcf21
0.370634	0.325802	0.952	0.971	1	Lung	Tnc
0.373043	-0.38623	0.619	0.604	1	Lung	Ccl2
0.414203	-0.280462	0.429	0.441	1	Lung	Krt19
0.426011	-0.496128	0.702	0.584	1	Lung	Igf1
0.460978	-0.256141	0.762	0.739	1	Lung	Mgst1
0.485726	-0.317678	1	0.998	1	Lung	Cst3
0.503576	-0.400687	0.548	0.588	1	Lung	Ccl7
0.549972	-1.63991	0.81	0.766	1	Lung	Clu
0.841971	-0.402329	0.333	0.322	1	Lung	Crct1
0.887577	-0.474455	0.619	0.58	1	Lung	Igfbp4
0.955142	-0.322512	0.667	0.6	1	Lung	Wisp2
0.977355	-0.478248	0.964	0.937	1	Lung	Spp1

## Sheet: Heart1 
p_val	avg_logFC	pct.1	pct.2	p_val_adj	cluster	gene
1.11706e-121	1.16952	0.997	0.865	1.8207e-117	Heart1	Vamp5
7.51081e-120	0.652029	0.918	0.277	1.22419e-115	Heart1	Aldh1a1
5.6855e-116	0.408204	0.879	0.171	9.26679e-112	Heart1	Hand2
1.14644e-113	1.1743	0.948	0.445	1.86858e-109	Heart1	Igf1
1.90993e-108	0.826033	0.933	0.382	3.113e-104	Heart1	Gdf6
2.36794e-107	0.875551	0.939	0.359	3.8595e-103	Heart1	Tbx20
1.86286e-98	0.572781	0.861	0.253	3.03628e-94	Heart1	Frzb
4.06719e-98	0.468739	0.788	0.191	6.62912e-94	Heart1	Scel
1.48197e-97	0.614235	0.794	0.181	2.41547e-93	Heart1	Hsd11b1
3.06262e-97	0.269852	0.658	0.08	4.99177e-93	Heart1	Itga4
1.10853e-96	0.620374	0.985	0.637	1.8068e-92	Heart1	Eng
2.92596e-94	1.21391	0.997	0.869	4.76902e-90	Heart1	Rbp1
1.68263e-93	0.884239	0.982	0.941	2.74251e-89	Heart1	Card19
3.07838e-92	0.655093	0.958	0.477	5.01746e-88	Heart1	Srpx2
5.34732e-92	0.755083	0.967	0.618	8.71559e-88	Heart1	Tmem45a
2.23513e-91	0.283866	0.748	0.145	3.64304e-87	Heart1	Myrf
1.66756e-90	1.10398	1	0.995	2.71796e-86	Heart1	S100a4
6.90549e-90	-1.29696	0.736	0.944	1.12553e-85	Heart1	Cd24a
2.18606e-87	-0.606864	0.782	0.97	3.56305e-83	Heart1	Tes
2.56017e-87	0.675365	0.958	0.674	4.17282e-83	Heart1	Ptprb
6.102e-87	0.756267	0.997	0.805	9.94565e-83	Heart1	Ptgis
7.06633e-87	-0.743335	0.539	0.884	1.15174e-82	Heart1	Sh3kbp1
2.74885e-86	0.815032	0.994	0.839	4.48036e-82	Heart1	Pdlim2
5.57553e-86	0.942041	0.985	0.793	9.08756e-82	Heart1	Col8a1
3.71783e-85	0.849558	0.991	0.903	6.05969e-81	Heart1	Lbh
1.1216e-84	1.01522	0.991	0.909	1.8281e-80	Heart1	Ckb
1.1654e-82	0.443256	0.848	0.257	1.89949e-78	Heart1	Tcf21
2.09709e-82	1.27427	0.997	0.972	3.41805e-78	Heart1	Ankrd1
4.46941e-80	0.283448	0.794	0.225	7.28469e-76	Heart1	Lama4
6.96943e-80	0.502237	0.852	0.319	1.13595e-75	Heart1	Sfrp1
7.03471e-80	0.827802	0.994	0.957	1.14659e-75	Heart1	Itgb5
8.50324e-78	0.798953	1	0.997	1.38594e-73	Heart1	Cst3
8.28113e-73	0.721638	0.897	0.496	1.34974e-68	Heart1	Sox9
1.37359e-72	0.580708	1	0.999	2.23881e-68	Heart1	Timp2
2.20956e-72	0.306939	0.745	0.205	3.60136e-68	Heart1	Prex2
2.60188e-72	1.17567	0.888	0.487	4.24081e-68	Heart1	Wisp2
4.87945e-71	0.57539	0.991	0.747	7.95302e-67	Heart1	Jam2
1.6989e-69	-0.587863	0.155	0.694	2.76903e-65	Heart1	Hoxb9
5.46632e-69	-0.277919	0.048	0.636	8.90956e-65	Heart1	Hoxb7
5.59717e-68	0.534421	0.973	0.7	9.12282e-64	Heart1	Pcolce2
5.87921e-68	0.748301	0.921	0.702	9.58252e-64	Heart1	Fam101b
6.82765e-67	-0.586255	0.976	0.99	1.11284e-62	Heart1	Prdx6
2.81594e-66	0.31531	0.73	0.219	4.5897e-62	Heart1	Clca3a1
5.88407e-66	-0.368469	0.039	0.607	9.59044e-62	Heart1	Hoxc9
3.3707e-65	0.378426	0.915	0.489	5.4939e-61	Heart1	Dclk1
5.06646e-65	0.510611	0.645	0.169	8.25782e-61	Heart1	Fxyd6
5.2376e-65	0.540762	0.991	0.943	8.53676e-61	Heart1	Fxyd5
5.55491e-65	-0.410907	0.03	0.598	9.05394e-61	Heart1	Hoxc8
6.67715e-65	0.301933	0.885	0.48	1.08831e-60	Heart1	Grk5
7.30645e-65	0.613511	0.858	0.424	1.19088e-60	Heart1	Ptx3
1.22286e-64	0.302763	0.748	0.273	1.99315e-60	Heart1	Gucy1b3
1.98669e-64	0.416125	0.927	0.469	3.2381e-60	Heart1	Col6a1
2.11166e-64	0.406528	0.894	0.469	3.4418e-60	Heart1	Synpo
1.69373e-63	-0.502853	0.503	0.839	2.76061e-59	Heart1	Arl4c
1.31563e-61	0.550893	0.852	0.393	2.14434e-57	Heart1	Cst6
1.78125e-61	-0.320281	0.058	0.599	2.90326e-57	Heart1	Hoxa7
7.71349e-61	-0.473176	0.63	0.906	1.25722e-56	Heart1	Ctxn1
8.86753e-61	-0.261773	0.052	0.595	1.44532e-56	Heart1	Hoxb8
1.28126e-60	-0.433199	0.067	0.594	2.08833e-56	Heart1	Hoxc10
1.42662e-60	-0.941167	0.791	0.925	2.32525e-56	Heart1	Hmga2
1.9998e-60	0.372807	0.882	0.47	3.25947e-56	Heart1	Jph2
1.01437e-59	0.361512	0.903	0.507	1.65332e-55	Heart1	Gpr39
1.3279e-59	0.455733	1	0.972	2.16434e-55	Heart1	Lhfp
4.3617e-59	-0.576517	1	0.999	7.10913e-55	Heart1	Ptma
1.3281e-58	0.595878	1	0.976	2.16467e-54	Heart1	Fstl1
1.08921e-57	-0.345757	0.567	0.856	1.7753e-53	Heart1	Tpbg
1.80763e-57	1.04063	0.903	0.656	2.94625e-53	Heart1	Tnnt2
2.7935e-57	0.756785	0.645	0.204	4.55312e-53	Heart1	Ccl17
2.98034e-57	-0.321117	0.109	0.618	4.85766e-53	Heart1	Hoxa5
4.21909e-57	-0.297811	0.045	0.561	6.8767e-53	Heart1	Hoxc6
1.11467e-56	0.275595	0.845	0.454	1.8168e-52	Heart1	Scrn1
1.53324e-56	0.792311	0.909	0.683	2.49902e-52	Heart1	Postn
8.74546e-56	-0.293987	0.052	0.558	1.42542e-51	Heart1	Hoxa10
8.8465e-55	0.40452	1	0.973	1.44189e-50	Heart1	Cltb
4.47312e-54	0.425333	1	1	7.29075e-50	Heart1	B2m
5.57497e-54	0.44217	1	0.999	9.08665e-50	Heart1	Dbi
6.43208e-54	0.354882	1	0.994	1.04837e-49	Heart1	Comt
1.65402e-53	0.522948	0.973	0.915	2.69588e-49	Heart1	Tubb2a
2.03926e-53	0.415882	0.961	0.842	3.32379e-49	Heart1	Lamc1
2.44554e-53	0.257395	0.518	0.113	3.98599e-49	Heart1	Kcnj15
3.46732e-53	-0.383962	0.979	0.997	5.65138e-49	Heart1	Hspa9
2.09563e-52	0.36615	0.803	0.344	3.41567e-48	Heart1	Dcn
4.20833e-52	-0.508346	0.63	0.866	6.85915e-48	Heart1	Enah
6.40284e-52	0.382888	0.924	0.619	1.0436e-47	Heart1	Emilin1
6.80533e-52	0.517847	1	1	1.1092e-47	Heart1	Tagln2
8.60592e-52	-0.3591	0.633	0.853	1.40268e-47	Heart1	Gpd2
3.97508e-51	0.456556	0.997	0.989	6.47898e-47	Heart1	Crip2
7.35538e-51	0.359272	0.985	0.909	1.19885e-46	Heart1	Copz2
1.80294e-50	0.444285	0.945	0.704	2.93861e-46	Heart1	Ass1
3.90757e-50	-0.563667	0.942	0.984	6.36894e-46	Heart1	Marcksl1
5.50202e-50	-0.344862	0.667	0.896	8.96774e-46	Heart1	Tead2
8.06972e-50	-0.578869	0.4	0.741	1.31528e-45	Heart1	Galnt18
8.24145e-49	-0.744977	0.812	0.939	1.34327e-44	Heart1	Hmox1
1.05275e-48	0.296253	0.782	0.392	1.71589e-44	Heart1	Ltbp4
2.18511e-48	0.478905	0.985	0.886	3.56151e-44	Heart1	Prdx4
4.38857e-48	0.312815	1	0.997	7.15293e-44	Heart1	Ost4
5.40781e-48	0.447898	0.982	0.937	8.81418e-44	Heart1	Plod2
6.70569e-48	-0.326651	0.952	0.992	1.09296e-43	Heart1	H2afy
1.4856e-47	-0.590649	0.315	0.686	2.42138e-43	Heart1	Fgf7
3.67048e-47	0.628368	0.985	0.866	5.98251e-43	Heart1	Col3a1
4.77483e-47	-0.325805	0.355	0.761	7.7825e-43	Heart1	Zfp503
6.82045e-47	0.325933	0.973	0.872	1.11166e-42	Heart1	Ninj1
1.13082e-46	-0.38823	0.997	1	1.84312e-42	Heart1	Hmgn1
1.60028e-46	0.40004	0.967	0.857	2.6083e-42	Heart1	Rab3ip
5.51019e-46	-0.350035	0.127	0.566	8.98106e-42	Heart1	Has2
6.48298e-46	-0.441774	0.988	0.997	1.05666e-41	Heart1	Hn1
1.28554e-45	0.362888	0.997	0.997	2.09531e-41	Heart1	Cstb
1.30228e-45	-0.500186	0.188	0.604	2.12259e-41	Heart1	Grem2
2.22709e-45	-0.295016	0.864	0.942	3.62994e-41	Heart1	Smarcc1
7.72881e-45	-0.574101	0.9	0.951	1.25972e-40	Heart1	Nrp1
1.10833e-44	0.583788	0.985	0.941	1.80647e-40	Heart1	Csrp2
3.976e-44	-0.631957	0.506	0.753	6.48049e-40	Heart1	Igfbp6
4.59117e-44	0.545845	0.994	0.994	7.48315e-40	Heart1	Ctgf
4.80582e-44	-0.71177	0.952	0.979	7.833e-40	Heart1	Sox4
1.26695e-43	0.371062	0.994	0.929	2.065e-39	Heart1	Ctsz
2.68582e-43	0.473398	0.991	0.967	4.37761e-39	Heart1	Tns1
4.50566e-43	0.298478	0.939	0.721	7.34377e-39	Heart1	Cd302
4.61998e-43	0.271946	0.618	0.243	7.5301e-39	Heart1	Tmem151a
4.74684e-43	0.428741	0.973	0.779	7.73687e-39	Heart1	Pmp22
1.51533e-42	0.264348	0.648	0.248	2.46984e-38	Heart1	Lif
2.09145e-42	-0.458517	0.988	0.997	3.40885e-38	Heart1	Denr
2.30794e-42	0.272453	0.882	0.631	3.7617e-38	Heart1	Gstm2
3.19755e-42	0.357108	0.994	0.968	5.21168e-38	Heart1	S100a13
6.76069e-42	0.292782	0.688	0.288	1.10193e-37	Heart1	Sod3
1.7535e-41	0.318919	1	0.997	2.85804e-37	Heart1	Ssr4
2.64518e-41	0.359801	0.982	0.934	4.31138e-37	Heart1	Mical2
2.93109e-41	-0.534191	0.861	0.946	4.77739e-37	Heart1	Ivns1abp
3.82258e-41	0.531625	0.997	0.982	6.23042e-37	Heart1	Col4a1
4.1326e-41	-0.979888	0.988	0.989	6.73573e-37	Heart1	Tsc22d1
4.59165e-41	0.285426	1	0.997	7.48393e-37	Heart1	Myeov2
1.01845e-40	-0.493322	0.167	0.56	1.65998e-36	Heart1	Sox11
1.32806e-40	0.38345	0.948	0.732	2.16461e-36	Heart1	Creg1
1.65566e-40	0.404517	0.985	0.932	2.69855e-36	Heart1	S100a16
2.69989e-40	0.276869	0.903	0.598	4.40055e-36	Heart1	Fcgrt
2.73113e-40	-0.332662	0.988	1	4.45146e-36	Heart1	Eif5
4.98762e-40	-0.528086	0.261	0.633	8.12933e-36	Heart1	Pmaip1
6.34595e-40	0.330494	0.991	0.987	1.03433e-35	Heart1	Gpx8
9.52934e-40	0.335473	0.967	0.932	1.55319e-35	Heart1	Sdc2
1.36963e-39	-0.402029	0.497	0.75	2.23237e-35	Heart1	Nt5dc2
3.71807e-39	0.407067	1	0.999	6.06008e-35	Heart1	Fn1
6.08162e-39	0.323027	0.967	0.858	9.91243e-35	Heart1	Tspan6
6.84328e-39	-0.315043	0.788	0.901	1.11539e-34	Heart1	Mast4
7.11858e-39	0.479684	0.879	0.631	1.16026e-34	Heart1	Tubb3
9.31002e-39	-2.15601	0.891	0.96	1.51744e-34	Heart1	Spp1
1.02193e-38	-0.319001	0.879	0.96	1.66565e-34	Heart1	Chd3
1.19042e-38	0.2952	0.927	0.783	1.94027e-34	Heart1	Agpat4
1.7425e-38	-0.304542	0.458	0.76	2.84011e-34	Heart1	Cxxc5
1.80841e-38	0.300708	0.821	0.502	2.94752e-34	Heart1	Tbx18
3.74488e-38	-0.677465	0.818	0.906	6.10378e-34	Heart1	Ncam1
6.21404e-38	-0.304109	0.264	0.618	1.01283e-33	Heart1	Nr4a2
8.73283e-38	0.319531	0.83	0.523	1.42336e-33	Heart1	Ereg
3.02171e-37	0.378636	1	0.994	4.92509e-33	Heart1	Bgn
3.22866e-37	0.440349	1	0.965	5.26239e-33	Heart1	Emp3
8.57615e-37	0.309638	0.927	0.631	1.39783e-32	Heart1	Tnfrsf11b
1.09677e-36	-0.516148	0.721	0.838	1.78763e-32	Heart1	Psat1
2.12604e-36	-0.570378	0.594	0.827	3.46523e-32	Heart1	Cotl1
2.70043e-36	-0.316879	0.988	0.997	4.40143e-32	Heart1	Cdk4
3.48179e-36	0.279311	0.945	0.799	5.67497e-32	Heart1	Mxra7
3.96513e-36	0.3554	0.988	0.941	6.46276e-32	Heart1	Unc5b
8.97951e-36	-0.292526	0.845	0.913	1.46357e-31	Heart1	Rb1cc1
1.00001e-35	0.385292	1	1	1.62991e-31	Heart1	Sparc
1.00486e-35	-0.746298	0.2	0.549	1.63782e-31	Heart1	Grem1
1.19633e-35	0.354336	0.976	0.896	1.9499e-31	Heart1	2310022B05Rik
1.44025e-35	-0.528025	0.952	0.971	2.34747e-31	Heart1	Cks1b
1.56214e-35	0.268672	0.985	0.939	2.54614e-31	Heart1	Ubl4a
2.61867e-35	0.293904	0.988	0.986	4.26816e-31	Heart1	Map1lc3a
2.62524e-35	0.252339	0.964	0.863	4.27888e-31	Heart1	Map6
2.64417e-35	0.325385	0.982	0.941	4.30974e-31	Heart1	Fads3
3.94424e-35	-0.292544	0.688	0.847	6.42871e-31	Heart1	Epb41l3
4.73077e-35	0.308226	1	0.995	7.71069e-31	Heart1	Reep5
6.28757e-35	0.313092	0.973	0.834	1.02481e-30	Heart1	Ctsh
7.27852e-35	0.414613	0.997	0.984	1.18633e-30	Heart1	Cryab
8.11959e-35	0.292351	0.861	0.603	1.32341e-30	Heart1	Smad6
1.0605e-34	0.27151	0.982	0.919	1.72851e-30	Heart1	Yif1b
1.64613e-34	0.330788	0.991	0.997	2.68303e-30	Heart1	Tspo
2.23863e-34	0.2504	0.9	0.741	3.64874e-30	Heart1	Il11ra1
3.29797e-34	0.274847	1	1	5.37537e-30	Heart1	Myl12a
4.08568e-34	0.347582	0.973	0.856	6.65925e-30	Heart1	Ifi27
4.56529e-34	0.29204	1	1	7.44096e-30	Heart1	Rhoc
5.32875e-34	-0.379421	0.982	0.986	8.68532e-30	Heart1	Txnrd1
5.79318e-34	-0.385769	0.888	0.908	9.4423e-30	Heart1	Prkar2a
6.98484e-34	0.324173	0.982	0.877	1.13846e-29	Heart1	Dpysl2
7.99271e-34	-0.255374	0.461	0.71	1.30273e-29	Heart1	Noct
1.2177e-33	-0.332071	0.479	0.736	1.98473e-29	Heart1	Egfr
1.25927e-33	0.328568	0.997	0.967	2.05249e-29	Heart1	Myadm
1.34036e-33	-0.257335	0.927	0.984	2.18466e-29	Heart1	Chd4
1.55166e-33	-0.628481	0.894	0.961	2.52904e-29	Heart1	Plin2
1.55552e-33	-0.257937	0.367	0.673	2.53533e-29	Heart1	Tmcc3
1.75993e-33	-0.415367	0.715	0.869	2.86852e-29	Heart1	Phgdh
2.81103e-33	-0.329752	0.785	0.904	4.5817e-29	Heart1	Grb10
2.9891e-33	-0.285976	0.952	0.976	4.87194e-29	Heart1	Sars
4.06237e-33	-0.405802	0.885	0.949	6.62126e-29	Heart1	Gclm
4.28861e-33	-0.362276	0.264	0.599	6.99e-29	Heart1	F11r
4.2954e-33	-0.296331	0.964	0.991	7.00107e-29	Heart1	Zwint
4.32746e-33	-0.251479	0.933	0.954	7.05332e-29	Heart1	Nudt4
6.9279e-33	-0.261935	0.864	0.934	1.12918e-28	Heart1	Bin1
1.0887e-32	-0.538395	0.876	0.923	1.77447e-28	Heart1	Mmd
2.53371e-32	0.349473	0.991	0.937	4.12969e-28	Heart1	Loxl1
3.19896e-32	0.339006	0.964	0.796	5.21398e-28	Heart1	Pam
3.40671e-32	0.340936	0.994	0.928	5.5526e-28	Heart1	Fam198b
5.14178e-32	0.317981	0.994	0.987	8.38059e-28	Heart1	Vimp
6.57046e-32	0.294499	0.897	0.699	1.07092e-27	Heart1	Zdhhc2
7.43769e-32	0.488735	0.879	0.63	1.21227e-27	Heart1	Gxylt2
1.01018e-31	-0.92887	0.867	0.947	1.6465e-27	Heart1	Ly6e
2.00237e-31	0.297759	0.997	0.991	3.26366e-27	Heart1	Cpe
2.51512e-31	-1.91456	0.839	0.89	4.0994e-27	Heart1	Cck
7.97648e-31	-0.25184	0.852	0.949	1.30009e-26	Heart1	Ifngr2
1.40228e-30	-0.783119	0.618	0.8	2.28558e-26	Heart1	Plac8
1.57848e-30	-0.257601	0.976	0.991	2.57277e-26	Heart1	Zc3h15
1.79106e-30	0.319433	0.776	0.511	2.91925e-26	Heart1	Cdc42ep2
1.85545e-30	0.290561	0.997	1	3.0242e-26	Heart1	Gabarap
2.07098e-30	-0.261261	0.997	0.996	3.37549e-26	Heart1	Ptges3
2.44457e-30	0.328111	0.997	0.997	3.98441e-26	Heart1	Pmepa1
2.81519e-30	-0.253233	1	1	4.58848e-26	Heart1	Eif4g2
4.24978e-30	-0.385404	0.791	0.856	6.92672e-26	Heart1	Mthfd2
4.84987e-30	-0.288374	0.897	0.957	7.90481e-26	Heart1	Slc48a1
5.2555e-30	-0.292976	0.103	0.432	8.56594e-26	Heart1	Ccbe1
5.36619e-30	0.270424	0.927	0.81	8.74636e-26	Heart1	Fstl3
6.37387e-30	0.320167	0.706	0.387	1.03888e-25	Heart1	Cemip
7.12338e-30	0.263698	1	0.99	1.16104e-25	Heart1	Myo1c
8.03877e-30	0.25811	0.955	0.841	1.31024e-25	Heart1	Hexa
8.60853e-30	-0.503417	0.618	0.771	1.4031e-25	Heart1	Flrt2
9.10369e-30	0.277461	0.994	0.966	1.48381e-25	Heart1	Mcfd2
1.321e-29	0.377339	0.994	0.947	2.1531e-25	Heart1	Emp1
1.3887e-29	0.262548	1	0.999	2.26344e-25	Heart1	Prdx5
2.46659e-29	0.379479	0.988	0.898	4.0203e-25	Heart1	Pcolce
3.25735e-29	0.274192	0.848	0.58	5.30915e-25	Heart1	Nfia
4.13149e-29	0.277766	0.979	0.893	6.73391e-25	Heart1	Qsox1
9.94124e-29	0.436671	0.955	0.747	1.62032e-24	Heart1	Cxcl12
1.33515e-28	0.40779	1	1	2.17616e-24	Heart1	Serpine1
1.39972e-28	0.366071	0.994	0.979	2.2814e-24	Heart1	Col4a2
1.42571e-28	-0.271385	1	0.999	2.32377e-24	Heart1	Ybx1
4.05565e-28	0.255379	0.918	0.755	6.61031e-24	Heart1	Scarb2
5.52987e-28	-0.289492	0.891	0.947	9.01314e-24	Heart1	Fkbp4
6.60922e-28	0.385497	0.952	0.795	1.07724e-23	Heart1	Fbln5
4.65476e-27	0.296893	0.985	0.895	7.58679e-23	Heart1	Vgll3
5.29862e-27	1.13871	0.97	0.929	8.63622e-23	Heart1	Mgp
1.08107e-26	-0.828322	0.715	0.805	1.76204e-22	Heart1	Cnn1
1.37979e-26	-0.2798	0.694	0.842	2.24891e-22	Heart1	Tmpo
1.9498e-26	-0.3088	1	1	3.17798e-22	Heart1	Ftl1
3.85682e-26	-0.340676	0.752	0.848	6.28623e-22	Heart1	Rbpms
4.05098e-26	-0.31622	0.976	0.977	6.60269e-22	Heart1	Lasp1
4.42633e-26	0.467972	0.8	0.56	7.21447e-22	Heart1	Thy1
6.52108e-26	-0.425042	0.506	0.712	1.06287e-21	Heart1	Ptgs1
6.56031e-26	0.254317	0.682	0.382	1.06926e-21	Heart1	Slc1a6
7.84737e-26	-0.334115	0.564	0.808	1.27904e-21	Heart1	Stmn1
1.79863e-25	-0.519802	0.976	0.981	2.93159e-21	Heart1	Sqstm1
2.36681e-25	-0.350539	0.873	0.937	3.85767e-21	Heart1	2700094K13Rik
2.42239e-25	-0.483679	0.112	0.407	3.94826e-21	Heart1	Il1rl1
4.8396e-25	-0.672506	0.93	0.956	7.88806e-21	Heart1	Ptgs2
5.88507e-25	0.282706	0.655	0.354	9.59208e-21	Heart1	Olfml3
7.72715e-25	-0.399152	0.912	0.954	1.25945e-20	Heart1	Plaur
8.11765e-25	0.351187	1	1	1.3231e-20	Heart1	Igfbp7
1.02241e-24	-0.265824	0.876	0.923	1.66642e-20	Heart1	Zak
1.35273e-24	-0.25884	0.779	0.913	2.20481e-20	Heart1	Irf2bpl
1.35649e-24	0.496542	0.736	0.449	2.21094e-20	Heart1	Glipr1
1.56218e-24	0.350394	0.642	0.362	2.5462e-20	Heart1	Serpinb9b
3.45595e-24	0.250068	1	0.999	5.63286e-20	Heart1	Myl6
4.0056e-24	0.291061	0.991	0.96	6.52873e-20	Heart1	Lmo4
5.32527e-24	0.439748	0.824	0.666	8.67965e-20	Heart1	Serpine2
6.87093e-24	0.416504	0.87	0.661	1.11989e-19	Heart1	Mustn1
6.97183e-24	-0.53239	0.939	0.927	1.13634e-19	Heart1	Itga5
7.40935e-24	-0.657687	0.942	0.979	1.20765e-19	Heart1	Mt1
8.84015e-24	0.359758	0.936	0.875	1.44086e-19	Heart1	H1f0
1.07274e-23	0.302184	1	0.971	1.74846e-19	Heart1	Col5a2
1.52145e-23	-0.274993	0.982	0.99	2.47981e-19	Heart1	Nars
1.77531e-23	-0.254934	1	1	2.89357e-19	Heart1	Rtn4
1.84955e-23	-0.267443	0.6	0.785	3.01458e-19	Heart1	Ccdc34
2.32149e-23	0.303768	0.994	0.933	3.78379e-19	Heart1	Ccdc80
2.36816e-23	-0.317841	0.894	0.941	3.85986e-19	Heart1	H2afz
3.70314e-23	-0.261646	0.248	0.528	6.03575e-19	Heart1	Thbd
3.87067e-23	-0.289601	0.094	0.374	6.3088e-19	Heart1	C1qtnf3
4.1513e-23	0.271444	0.948	0.861	6.76621e-19	Heart1	Fkbp7
5.40058e-23	-0.382715	0.582	0.743	8.8024e-19	Heart1	Hmgb3
6.36148e-23	-0.281002	0.979	0.979	1.03686e-18	Heart1	Plec
9.41195e-23	0.518065	1	0.996	1.53405e-18	Heart1	Timp1
1.00625e-22	-0.31185	0.591	0.789	1.64008e-18	Heart1	Gja1
1.14676e-22	0.411622	1	1	1.86911e-18	Heart1	Cd63
1.56363e-22	0.539943	1	0.999	2.54856e-18	Heart1	Acta2
1.92908e-22	-0.314867	0.791	0.877	3.1442e-18	Heart1	Dek
3.15029e-22	-0.271099	0.979	0.995	5.13466e-18	Heart1	Vmp1
3.25598e-22	0.261291	0.9	0.785	5.30692e-18	Heart1	Nnmt
4.14866e-22	0.28562	1	1	6.7619e-18	Heart1	Actb
6.46146e-22	-0.279255	0.961	0.98	1.05315e-17	Heart1	Zfos1
7.7113e-22	-0.394953	0.273	0.539	1.25686e-17	Heart1	Gm2115
9.05433e-22	-0.280038	0.915	0.927	1.47577e-17	Heart1	Lima1
1.00662e-21	-0.444818	0.533	0.716	1.64069e-17	Heart1	Rrm2
1.16324e-21	0.320114	0.806	0.593	1.89597e-17	Heart1	Npnt
3.07044e-21	0.251606	0.997	0.996	5.0045e-17	Heart1	Ppib
4.36501e-21	-0.27642	0.933	0.941	7.11452e-17	Heart1	Fez2
6.10986e-21	-0.322449	0.861	0.898	9.95846e-17	Heart1	Hk2
8.27596e-21	0.328979	0.997	0.985	1.3489e-16	Heart1	Csf1
5.83541e-20	0.340912	0.979	0.901	9.51114e-16	Heart1	Cd9
6.31546e-20	-0.451498	0.997	0.976	1.02936e-15	Heart1	Cd44
8.96959e-20	-0.287271	0.324	0.568	1.46195e-15	Heart1	Rdh10
1.27548e-19	-0.274325	0.991	0.997	2.07891e-15	Heart1	Nap1l1
2.77395e-19	-0.333542	0.988	0.994	4.52126e-15	Heart1	Eif4ebp1
3.3954e-19	-0.277611	0.742	0.817	5.53417e-15	Heart1	Srxn1
3.69372e-19	-0.50773	0.736	0.813	6.0204e-15	Heart1	Serpinf1
4.51861e-19	-0.251981	0.8	0.872	7.36488e-15	Heart1	Steap2
4.85168e-19	0.312391	1	0.986	7.90775e-15	Heart1	Cyr61
6.74957e-19	-0.34246	0.812	0.904	1.10011e-14	Heart1	Palld
8.66805e-19	-0.314085	0.894	0.923	1.41281e-14	Heart1	Dut
1.10137e-18	-0.259423	0.994	0.992	1.79512e-14	Heart1	Prr13
1.43669e-18	0.333017	0.391	0.166	2.34167e-14	Heart1	Asb5
3.00994e-18	-0.258687	0.648	0.784	4.9059e-14	Heart1	Ddah2
3.36859e-18	0.275219	0.973	0.905	5.49046e-14	Heart1	Wisp1
3.94489e-18	-0.256024	0.939	0.957	6.42978e-14	Heart1	Map1b
4.20663e-18	-0.253201	0.467	0.674	6.85639e-14	Heart1	Smc2
5.56058e-18	0.368239	0.988	0.962	9.06319e-14	Heart1	Timp3
8.10333e-18	-0.271198	0.994	0.982	1.32076e-13	Heart1	Basp1
1.19289e-17	-0.468665	0.627	0.705	1.9443e-13	Heart1	Thbs2
1.80172e-17	-0.301438	0.918	0.91	2.93662e-13	Heart1	Atf5
4.90168e-17	-0.353049	0.167	0.397	7.98925e-13	Heart1	Dkk2
9.32945e-17	0.785752	0.482	0.257	1.52061e-12	Heart1	Crct1
1.08664e-16	0.312284	0.53	0.302	1.77111e-12	Heart1	Ppp1r14a
2.11394e-16	-0.299014	0.985	0.997	3.44551e-12	Heart1	Sepw1
2.87884e-16	0.386941	0.997	0.986	4.69223e-12	Heart1	Tagln
4.93925e-16	-0.445188	0.445	0.607	8.05048e-12	Heart1	Prrx2
6.71508e-16	-0.503684	0.806	0.866	1.09449e-11	Heart1	Mt2
1.76222e-15	0.250422	0.982	0.957	2.87224e-11	Heart1	Msrb1
1.91662e-15	-0.261011	1	1	3.12391e-11	Heart1	H3f3b
2.18332e-15	0.421482	0.961	0.871	3.5586e-11	Heart1	Cthrc1
3.89793e-15	-0.28784	0.997	0.997	6.35323e-11	Heart1	Itgb1
4.22011e-15	-0.290406	0.409	0.608	6.87835e-11	Heart1	Hmgb2
6.20784e-15	-0.360318	0.715	0.814	1.01182e-10	Heart1	Btg2
1.40328e-14	0.263386	0.973	0.938	2.28721e-10	Heart1	Hes1
1.4229e-14	0.280312	0.991	0.966	2.31918e-10	Heart1	Gadd45g
2.36915e-14	-0.258466	0.639	0.755	3.86148e-10	Heart1	Oxr1
1.92422e-13	-0.35485	0.791	0.809	3.13629e-09	Heart1	Lrrc32
3.13921e-13	-0.646402	0.333	0.497	5.11661e-09	Heart1	Actg2
5.9062e-13	-0.279341	0.661	0.743	9.62652e-09	Heart1	Ank
7.56643e-13	-0.669469	0.491	0.625	1.23325e-08	Heart1	Ccl7
7.73425e-13	-0.839688	0.185	0.374	1.2606e-08	Heart1	Spint2
2.48633e-12	-0.271499	0.988	0.99	4.05246e-08	Heart1	Dstn
3.34651e-12	-0.494514	0.348	0.525	5.45448e-08	Heart1	2810417H13Rik
4.93166e-12	0.450699	0.621	0.47	8.03811e-08	Heart1	Igfbp2
1.05899e-11	-0.259122	0.503	0.63	1.72605e-07	Heart1	Fam111a
1.1475e-11	-0.254701	0.809	0.796	1.8703e-07	Heart1	Ebf1
1.18157e-11	0.301498	0.988	0.976	1.92585e-07	Heart1	Crlf1
2.10243e-11	-1.17591	0.497	0.608	3.42675e-07	Heart1	Ly6a
2.11032e-11	-0.293782	0.882	0.788	3.43962e-07	Heart1	Prrx1
3.20123e-11	-0.431675	0.861	0.908	5.21769e-07	Heart1	Lgals3
4.90029e-11	-0.287226	0.145	0.308	7.98699e-07	Heart1	Akr1c19
5.89012e-11	-0.254081	0.994	0.996	9.60031e-07	Heart1	Atp6v1g1
8.35065e-11	-0.25888	0.858	0.853	1.36107e-06	Heart1	Ugcg
8.99488e-11	-0.393211	0.773	0.834	1.46607e-06	Heart1	Cdkn2a
9.57993e-11	-0.312184	0.1	0.254	1.56143e-06	Heart1	Spns2
1.49607e-10	-0.519206	0.5	0.616	2.43844e-06	Heart1	Ldhb
1.66513e-10	-0.277274	1	0.997	2.71399e-06	Heart1	Rpl22l1
4.7446e-10	-0.302846	0.276	0.427	7.73323e-06	Heart1	Peg3
1.06825e-09	-0.268743	0.294	0.469	1.74115e-05	Heart1	Top2a
1.43605e-09	-0.483018	0.994	0.997	2.34062e-05	Heart1	Ngfrap1
2.9164e-09	-0.571135	0.912	0.937	4.75343e-05	Heart1	Gpx3
3.4339e-09	-0.33407	0.427	0.269	5.59692e-05	Heart1	Esm1
3.83992e-09	-0.315792	0.473	0.598	6.25869e-05	Heart1	Birc5
3.92278e-09	-0.316739	0.873	0.92	6.39374e-05	Heart1	2200002D01Rik
4.40074e-09	-0.356968	0.967	0.971	7.17276e-05	Heart1	Tnc
6.15199e-09	-0.252462	0.958	0.942	0.000100271	Heart1	Plk2
9.73836e-09	-0.388374	0.345	0.479	0.000158725	Heart1	Krt19
9.82364e-09	-0.268647	0.185	0.327	0.000160115	Heart1	Mylk
4.17136e-08	-0.70922	0.352	0.461	0.00067989	Heart1	Gdf15
9.42005e-08	-0.267591	0.239	0.379	0.00153537	Heart1	A330069E16Rik
1.6735e-07	-0.350442	0.409	0.498	0.00272764	Heart1	Gadd45a
2.80948e-07	0.26998	0.976	0.93	0.00457918	Heart1	Crip1
6.48033e-07	-0.269837	0.242	0.37	0.0105623	Heart1	Nrn1
8.82747e-07	-1.17797	0.161	0.279	0.0143879	Heart1	Krt8
1.32657e-06	-0.768596	0.403	0.485	0.0216218	Heart1	Il11
1.70771e-06	-0.255023	0.664	0.737	0.0278339	Heart1	Ccnd1
2.33264e-06	-0.294926	0.979	0.976	0.0380197	Heart1	Phlda1
7.50405e-06	-0.276744	0.385	0.487	0.122309	Heart1	Aif1l
9.59923e-06	-0.640159	0.291	0.388	0.156458	Heart1	Sfn
1.19004e-05	-0.309198	0.327	0.411	0.193965	Heart1	Itga3
1.52418e-05	-0.345956	0.997	1	0.248425	Heart1	Wbp5
2.00065e-05	-0.283014	0.742	0.735	0.326087	Heart1	Cdc42ep3
2.96661e-05	-0.292578	0.342	0.416	0.483528	Heart1	Col6a3
9.34203e-05	-1.2037	0.315	0.391	1	Heart1	Krt18
0.000178768	-0.282985	0.979	0.984	1	Heart1	Neat1
0.000194412	-0.297009	0.976	0.928	1	Heart1	Inhba
0.000572216	-0.456275	0.903	0.914	1	Heart1	F3
0.000961639	-1.81956	0.752	0.776	1	Heart1	Clu
0.00359745	-0.677386	0.588	0.612	1	Heart1	Ccl2
0.00582535	-0.300559	0.952	0.912	1	Heart1	Nupr1
0.0100176	-0.360786	0.888	0.838	1	Heart1	Bicc1
0.0618744	-0.422388	0.9	0.834	1	Heart1	Cystm1
0.15273	-0.59239	0.57	0.588	1	Heart1	Igfbp4
0.250386	-0.266882	0.903	0.826	1	Heart1	Meg3
0.69167	-0.277312	0.815	0.748	1	Heart1	Jag1
0.774947	-0.338108	0.642	0.59	1	Heart1	Smoc2

## Sheet: Heart2 
p_val	avg_logFC	pct.1	pct.2	p_val_adj	cluster	gene
1.20588e-43	1.28513	1	0.717	1.96546e-39	Heart2	Mgst1
4.44204e-35	1.14629	0.957	0.746	7.24007e-31	Heart2	Gstm1
1.3299e-33	-0.898723	0.925	0.987	2.1676e-29	Heart2	Cd44
1.80821e-33	0.676213	1	0.996	2.9472e-29	Heart2	Map1lc3b
2.02992e-32	0.802338	0.903	0.481	3.30857e-28	Heart2	Sepp1
9.52925e-32	0.722132	1	1	1.55317e-27	Heart2	B2m
1.04935e-31	0.72408	1	0.9	1.71033e-27	Heart2	Ctsa
4.19087e-31	1.18527	1	0.998	6.8307e-27	Heart2	Ctsl
2.88031e-29	0.495858	0.903	0.617	4.69462e-25	Heart2	Hexb
4.41158e-29	0.770535	1	0.989	7.19043e-25	Heart2	Itm2b
8.04213e-29	0.621761	1	0.996	1.31079e-24	Heart2	Tmem59
1.0517e-28	0.76174	0.849	0.45	1.71417e-24	Heart2	Gpnmb
1.28322e-28	-0.859639	0.548	0.911	2.09152e-24	Heart2	Ncam1
2.37293e-28	0.64229	0.978	0.965	3.86764e-24	Heart2	Lamp2
2.55293e-28	-0.619115	1	1	4.16102e-24	Heart2	Actn1
2.62029e-28	0.580018	1	0.999	4.27082e-24	Heart2	Lamp1
2.68055e-28	0.731236	0.978	0.779	4.36902e-24	Heart2	Creg1
4.99564e-28	0.598697	0.978	0.901	8.14239e-24	Heart2	Glmp
7.03681e-28	0.525518	0.753	0.315	1.14693e-23	Heart2	Serpini1
1.56396e-27	0.405497	0.753	0.303	2.5491e-23	Heart2	Ndrg2
1.58895e-27	0.41766	0.828	0.382	2.58983e-23	Heart2	Smpdl3a
1.70695e-27	0.728014	0.978	0.953	2.78216e-23	Heart2	Grn
1.14846e-26	0.645025	1	0.994	1.87187e-22	Heart2	Ctsd
1.20132e-26	-0.451758	0.978	0.99	1.95804e-22	Heart2	Capn2
2.98461e-26	0.926113	0.613	0.204	4.86462e-22	Heart2	Pdlim3
3.16646e-26	-0.890587	0.989	0.991	5.16101e-22	Heart2	Tuba1b
6.85647e-26	0.624992	0.946	0.781	1.11754e-21	Heart2	Ypel3
1.066e-25	0.645515	0.839	0.547	1.73748e-21	Heart2	Uap1l1
1.18424e-25	0.432163	0.914	0.586	1.9302e-21	Heart2	Tcn2
1.5414e-25	0.506941	0.989	0.945	2.51233e-21	Heart2	Ctsz
3.1346e-25	0.574259	0.742	0.319	5.10909e-21	Heart2	Cda
4.92328e-25	-0.600713	0.989	0.997	8.02446e-21	Heart2	Ahnak
9.81792e-25	0.698694	1	0.992	1.60022e-20	Heart2	Ctsb
1.43999e-24	0.438374	0.903	0.637	2.34704e-20	Heart2	Pink1
2.26958e-24	0.606737	0.935	0.869	3.69919e-20	Heart2	Hexa
3.01297e-24	0.448196	0.978	0.831	4.91083e-20	Heart2	Grina
3.52593e-24	0.45944	0.968	0.826	5.74692e-20	Heart2	Atp6ap2
7.02508e-24	0.343201	0.763	0.363	1.14502e-19	Heart2	Dpp7
1.10424e-23	-0.477679	0.409	0.813	1.7998e-19	Heart2	Pcdh19
1.1788e-23	-0.529399	0.903	0.991	1.92132e-19	Heart2	Axl
1.41775e-23	0.485477	1	0.999	2.31079e-19	Heart2	Laptm4a
2.26907e-23	0.521863	0.989	0.965	3.69835e-19	Heart2	Serinc3
2.57825e-23	-0.559529	0.86	0.997	4.20228e-19	Heart2	Basp1
2.89515e-23	-0.59504	0.968	0.99	4.71881e-19	Heart2	Lpp
4.83965e-23	-1.0019	0.968	0.986	7.88815e-19	Heart2	Lox
5.25803e-23	-0.667907	0.699	0.946	8.57006e-19	Heart2	Wisp1
5.57794e-23	0.359567	0.43	0.097	9.09148e-19	Heart2	Ramp2
5.76456e-23	0.595674	0.892	0.495	9.39565e-19	Heart2	Cst6
8.26088e-23	-0.55903	1	0.991	1.34644e-18	Heart2	Ybx3
8.47184e-23	-0.452706	0.527	0.856	1.38083e-18	Heart2	Cdh11
9.43411e-23	0.452468	1	1	1.53767e-18	Heart2	Rhoc
9.78464e-23	0.478942	1	0.999	1.5948e-18	Heart2	Gabarap
1.16232e-22	-0.881501	0.914	0.994	1.89446e-18	Heart2	Tpm2
1.56514e-22	-0.455261	1	0.999	2.55102e-18	Heart2	Ybx1
1.89496e-22	-0.446258	1	0.995	3.08859e-18	Heart2	Actn4
2.80165e-22	0.383096	0.667	0.27	4.5664e-18	Heart2	Gata4
3.18951e-22	-0.518166	0.957	0.998	5.19859e-18	Heart2	Anxa3
3.71948e-22	0.457116	0.957	0.879	6.06239e-18	Heart2	Mfsd1
4.82283e-22	0.465638	0.989	0.988	7.86073e-18	Heart2	Ifitm2
7.53319e-22	-0.490956	1	0.997	1.22783e-17	Heart2	Flna
1.00804e-21	0.729537	1	0.976	1.643e-17	Heart2	Taldo1
1.13023e-21	0.315141	0.849	0.602	1.84217e-17	Heart2	Laptm4b
1.13254e-21	-0.39079	0.817	0.954	1.84593e-17	Heart2	Npm3
1.41318e-21	0.503852	0.989	0.98	2.30335e-17	Heart2	Ndufa6
1.48612e-21	0.496718	1	0.995	2.42223e-17	Heart2	Atp5f1
1.54286e-21	0.525722	0.882	0.562	2.51471e-17	Heart2	Gas6
2.16944e-21	0.544252	0.892	0.669	3.53596e-17	Heart2	Fcgrt
2.24955e-21	0.898709	1	0.978	3.66654e-17	Heart2	Sqstm1
2.49541e-21	0.324456	0.806	0.416	4.06727e-17	Heart2	Qpct
3.09677e-21	-0.471883	0.677	0.922	5.04743e-17	Heart2	Prkar2a
3.24467e-21	0.441002	0.527	0.156	5.28849e-17	Heart2	Cd34
3.70786e-21	0.517819	0.968	0.867	6.04344e-17	Heart2	Ctsh
5.09415e-21	-0.934318	0.957	0.973	8.30296e-17	Heart2	Myl9
5.31471e-21	0.657844	1	0.998	8.66245e-17	Heart2	Esd
6.0632e-21	0.437806	1	0.985	9.8824e-17	Heart2	Tmem50a
8.40153e-21	0.460671	0.968	0.937	1.36937e-16	Heart2	Aldh2
8.81376e-21	0.428055	0.978	0.913	1.43655e-16	Heart2	Mapk3
1.00745e-20	-0.341479	0.839	0.967	1.64204e-16	Heart2	Ergic1
1.36392e-20	-0.458225	0.978	0.984	2.22305e-16	Heart2	Ptrf
1.6996e-20	0.50332	1	0.983	2.77018e-16	Heart2	Arpc3
1.77772e-20	0.484545	0.978	0.961	2.89751e-16	Heart2	Rap1a
1.88515e-20	-0.735435	0.957	0.991	3.0726e-16	Heart2	Prss23
2.48358e-20	0.384843	1	0.955	4.04799e-16	Heart2	Npdc1
3.82158e-20	0.516374	0.559	0.196	6.22879e-16	Heart2	Cygb
3.83003e-20	0.327702	0.634	0.26	6.24257e-16	Heart2	Tnfaip6
5.83999e-20	0.520289	0.914	0.781	9.5186e-16	Heart2	Lgmn
5.96904e-20	-0.999455	0.989	1	9.72894e-16	Heart2	Acta2
1.03872e-19	-0.506514	0.312	0.764	1.69301e-15	Heart2	Flrt2
1.13343e-19	-0.428888	1	0.999	1.84738e-15	Heart2	Hmgn1
1.23896e-19	0.6055	1	0.998	2.01939e-15	Heart2	Cst3
1.34754e-19	0.322593	0.968	0.856	2.19635e-15	Heart2	Bnip3l
1.5177e-19	0.563896	0.892	0.795	2.4737e-15	Heart2	Scarb2
1.69326e-19	-0.410582	1	1	2.75985e-15	Heart2	Pfn1
1.72619e-19	0.458404	0.968	0.892	2.81352e-15	Heart2	Tpp1
1.99153e-19	0.724378	1	0.917	3.246e-15	Heart2	Cd9
2.28349e-19	0.573191	1	0.997	3.72186e-15	Heart2	Ubb
2.4887e-19	0.27583	0.505	0.161	4.05633e-15	Heart2	Acot1
4.17741e-19	0.646815	1	1	6.80876e-15	Heart2	Cd63
4.24476e-19	0.484889	0.935	0.62	6.91853e-15	Heart2	Tmem176b
4.28834e-19	-0.415474	0.892	0.959	6.98957e-15	Heart2	Hacd1
4.53778e-19	0.302421	0.409	0.102	7.39613e-15	Heart2	Gsta3
4.85107e-19	0.355287	0.989	0.989	7.90676e-15	Heart2	Ube2b
5.00586e-19	0.656725	0.978	0.91	8.15905e-15	Heart2	Prdx4
5.90132e-19	0.50391	0.989	0.989	9.61857e-15	Heart2	Atp6v0b
5.92752e-19	-0.550471	0.247	0.676	9.66126e-15	Heart2	Galnt18
6.89041e-19	0.417864	1	0.989	1.12307e-14	Heart2	Atp6v1f
7.40588e-19	-0.588862	1	1	1.20708e-14	Heart2	Tpm1
7.9034e-19	0.26359	0.634	0.252	1.28817e-14	Heart2	Plxna4
8.78897e-19	0.693859	0.882	0.641	1.43251e-14	Heart2	Mmp2
9.51776e-19	0.347733	0.978	0.88	1.5513e-14	Heart2	Atraid
1.10633e-18	0.405916	1	0.987	1.80321e-14	Heart2	Smim14
1.1064e-18	0.483601	1	0.995	1.80331e-14	Heart2	Cd81
1.1673e-18	-0.331568	0.968	0.984	1.90258e-14	Heart2	Hras
1.19563e-18	-0.4159	0.925	0.992	1.94876e-14	Heart2	Sept11
1.34322e-18	-0.542186	0.978	0.99	2.18931e-14	Heart2	Dstn
1.4403e-18	0.369987	1	0.961	2.34755e-14	Heart2	Dctn3
1.55439e-18	0.446515	0.892	0.743	2.53349e-14	Heart2	Lipa
1.7114e-18	0.589434	0.978	0.879	2.78941e-14	Heart2	H2-D1
1.77607e-18	0.310499	0.849	0.509	2.89482e-14	Heart2	Bnip3
2.03072e-18	0.359437	1	0.99	3.30988e-14	Heart2	Rabac1
3.82869e-18	-0.86501	0.785	0.895	6.24038e-14	Heart2	Hmga2
4.1003e-18	0.419457	0.978	0.988	6.68308e-14	Heart2	Chic2
4.42432e-18	-0.464717	0.785	0.926	7.2112e-14	Heart2	Dut
4.59535e-18	-0.46062	0.763	0.972	7.48996e-14	Heart2	Ddah1
4.67998e-18	-0.400553	1	0.996	7.62791e-14	Heart2	1810037I17Rik
5.7966e-18	-0.583953	0.57	0.802	9.44788e-14	Heart2	Sh3kbp1
6.07062e-18	-0.41945	0.473	0.87	9.89451e-14	Heart2	Mthfd2
6.78088e-18	0.426393	0.581	0.233	1.10521e-13	Heart2	Serping1
7.40929e-18	0.670599	0.914	0.829	1.20764e-13	Heart2	Ahnak2
7.93253e-18	0.911077	0.968	0.901	1.29292e-13	Heart2	Rbp1
8.73065e-18	0.704717	0.742	0.403	1.42301e-13	Heart2	Tcf21
9.0003e-18	-0.522503	0.527	0.829	1.46696e-13	Heart2	Psat1
9.27016e-18	0.291568	0.581	0.233	1.51094e-13	Heart2	Ctnnal1
9.88267e-18	-0.636446	0.892	0.972	1.61078e-13	Heart2	Cks1b
1.44912e-17	0.383425	1	0.992	2.36191e-13	Heart2	H3f3a
1.76969e-17	1.00775	0.806	0.449	2.88442e-13	Heart2	Dcn
1.95178e-17	0.328791	0.935	0.879	3.18121e-13	Heart2	Asna1
1.962e-17	-0.460956	0.989	0.994	3.19787e-13	Heart2	Ranbp1
2.00197e-17	-0.438277	1	1	3.26301e-13	Heart2	Eif5a
2.07233e-17	0.598571	1	1	3.3777e-13	Heart2	Igfbp7
2.34564e-17	0.694333	0.957	0.72	3.82315e-13	Heart2	Eng
3.07008e-17	-0.344759	0.871	0.973	5.00392e-13	Heart2	Kpnb1
3.1182e-17	0.338608	0.892	0.676	5.08235e-13	Heart2	Msi2
3.47261e-17	-0.433134	0.989	0.996	5.66e-13	Heart2	Nap1l1
3.70799e-17	-0.38942	0.925	0.99	6.04365e-13	Heart2	Fat1
3.72421e-17	0.39999	0.978	0.914	6.0701e-13	Heart2	H2afv
3.8706e-17	-0.461169	0.978	0.992	6.30869e-13	Heart2	Flnb
4.03055e-17	-0.461029	0.097	0.575	6.5694e-13	Heart2	Hoxb9
4.05134e-17	-0.416807	0.978	0.991	6.60328e-13	Heart2	Hspd1
4.17827e-17	0.389057	0.946	0.907	6.81016e-13	Heart2	Spag9
4.22851e-17	-0.358537	1	1	6.89206e-13	Heart2	Hspe1
4.6398e-17	1.2291	0.978	0.967	7.56241e-13	Heart2	Mt1
4.71619e-17	-0.422134	0.86	0.947	7.68692e-13	Heart2	Glipr2
4.96974e-17	-0.326814	0.398	0.766	8.10018e-13	Heart2	Bcat1
5.60411e-17	-0.344415	1	1	9.13414e-13	Heart2	Rpl12
8.00766e-17	-0.31892	1	1	1.30517e-12	Heart2	Rps2
8.21103e-17	0.401848	1	0.977	1.33832e-12	Heart2	Psma5
9.23358e-17	-0.369503	0.978	0.986	1.50498e-12	Heart2	Pdap1
9.32814e-17	-0.906973	0.548	0.8	1.52039e-12	Heart2	Cnn1
1.03436e-16	0.474745	0.989	0.958	1.6859e-12	Heart2	Rnh1
1.03769e-16	0.3417	1	0.978	1.69133e-12	Heart2	Ubxn1
1.15058e-16	0.893017	0.871	0.698	1.87533e-12	Heart2	Serpine2
1.1616e-16	0.348847	1	0.989	1.89328e-12	Heart2	Paip2
1.4518e-16	0.631116	0.925	0.872	2.3663e-12	Heart2	Ecm1
1.64467e-16	-0.362074	0.989	0.996	2.68065e-12	Heart2	Snhg6
1.82898e-16	-0.426926	1	0.997	2.98106e-12	Heart2	Itgb1
1.9635e-16	-0.258968	0.473	0.82	3.20031e-12	Heart2	Hn1l
2.29144e-16	-0.38916	0.462	0.773	3.73483e-12	Heart2	Loxl3
2.98087e-16	0.268778	0.72	0.4	4.85852e-12	Heart2	Pir
3.78252e-16	-0.31009	1	1	6.16513e-12	Heart2	Rplp1
4.11503e-16	0.296818	1	0.995	6.70709e-12	Heart2	Psmb1
4.89571e-16	-0.520741	0.989	0.994	7.97952e-12	Heart2	Manf
5.10905e-16	0.350354	1	0.962	8.32723e-12	Heart2	Sin3b
5.24451e-16	-0.289413	1	1	8.54802e-12	Heart2	Mtpn
5.78046e-16	0.792546	0.796	0.506	9.42158e-12	Heart2	Tbx20
6.40023e-16	0.655885	0.914	0.904	1.04317e-11	Heart2	Mxra8
7.14172e-16	-0.880889	0.989	0.989	1.16403e-11	Heart2	Tagln
7.41869e-16	-0.395939	0.925	0.983	1.20917e-11	Heart2	Plec
8.92756e-16	0.29395	0.914	0.608	1.4551e-11	Heart2	Scn1b
9.47041e-16	-0.422552	0.527	0.821	1.54358e-11	Heart2	Enah
1.13126e-15	0.272131	1	1	1.84384e-11	Heart2	Gnas
1.23023e-15	-0.31407	0.892	0.984	2.00514e-11	Heart2	Ryk
1.48811e-15	0.320573	1	0.997	2.42547e-11	Heart2	Gpx4
1.50473e-15	0.253805	0.548	0.206	2.45255e-11	Heart2	Abca1
1.59662e-15	-0.33574	0.968	0.994	2.60233e-11	Heart2	Tomm5
1.63159e-15	-0.392231	1	1	2.65932e-11	Heart2	Lgals1
1.63837e-15	0.421475	0.957	0.846	2.67038e-11	Heart2	2010111I01Rik
1.75473e-15	0.338167	0.978	0.981	2.86003e-11	Heart2	Cnpy2
1.83662e-15	0.356974	1	0.972	2.9935e-11	Heart2	Psap
2.21941e-15	0.317494	1	0.997	3.61742e-11	Heart2	Clta
2.36852e-15	-0.33126	0.032	0.467	3.86045e-11	Heart2	Hoxc8
2.43812e-15	0.257225	0.903	0.706	3.97389e-11	Heart2	Htatip2
2.58126e-15	0.319657	0.946	0.781	4.2072e-11	Heart2	Cpd
3.01418e-15	0.254702	0.925	0.804	4.91281e-11	Heart2	BC005624
3.07124e-15	-0.339471	0.925	0.987	5.00581e-11	Heart2	Cdv3
3.40981e-15	-0.460106	0.968	0.994	5.55765e-11	Heart2	Cnn2
3.43672e-15	-0.300056	0.935	0.986	5.60152e-11	Heart2	Akt1
3.73418e-15	-0.297946	0.301	0.672	6.08634e-11	Heart2	Zfp503
3.77064e-15	-0.453669	0.473	0.782	6.14576e-11	Heart2	Ltbp2
4.44139e-15	0.339012	1	0.997	7.23903e-11	Heart2	Atp5h
5.38882e-15	0.518467	0.806	0.553	8.78324e-11	Heart2	Casp6
5.50023e-15	-0.308452	0.505	0.786	8.96482e-11	Heart2	Wnt5a
5.55264e-15	0.259865	0.828	0.625	9.05025e-11	Heart2	Pepd
6.16135e-15	-0.641735	0.957	0.971	1.00424e-10	Heart2	Tnc
6.49658e-15	0.272775	0.591	0.257	1.05888e-10	Heart2	Cx3cl1
7.01726e-15	-0.300747	0.914	0.98	1.14374e-10	Heart2	Lsm6
7.03575e-15	-0.422674	0.559	0.847	1.14676e-10	Heart2	Phgdh
7.20878e-15	-0.51132	0.817	0.929	1.17496e-10	Heart2	Col5a1
7.31958e-15	0.301059	0.925	0.77	1.19302e-10	Heart2	Trappc6a
7.99157e-15	-0.446776	1	1	1.30255e-10	Heart2	Calr
8.40351e-15	-0.352996	0.215	0.64	1.36969e-10	Heart2	Gjb3
8.68371e-15	-0.316805	1	0.988	1.41536e-10	Heart2	Ssr1
8.93898e-15	0.279547	0.978	0.887	1.45696e-10	Heart2	Psme2
8.96657e-15	0.315312	0.989	0.967	1.46146e-10	Heart2	Eif3m
9.00673e-15	0.332239	0.978	0.951	1.46801e-10	Heart2	Oaz2
9.23803e-15	-0.262357	0.301	0.692	1.50571e-10	Heart2	Slc7a5
9.69982e-15	0.286502	0.989	0.994	1.58097e-10	Heart2	Prkar1a
9.81653e-15	0.326068	0.946	0.945	1.6e-10	Heart2	Fuca1
1.05702e-14	-0.321731	0.323	0.686	1.72284e-10	Heart2	Cd248
1.11019e-14	0.285794	0.882	0.782	1.8095e-10	Heart2	Ndfip1
1.18295e-14	0.259633	0.871	0.634	1.9281e-10	Heart2	Gnpda2
1.26776e-14	-0.293952	0.828	0.946	2.06632e-10	Heart2	Ipo5
1.30843e-14	0.575455	1	0.998	2.13261e-10	Heart2	Prdx1
1.50303e-14	-0.442544	0.978	0.996	2.44979e-10	Heart2	Denr
1.67772e-14	0.263229	0.978	0.904	2.73451e-10	Heart2	Erlec1
1.70883e-14	-1.78116	0.731	0.888	2.78522e-10	Heart2	Cck
1.83843e-14	0.253172	0.871	0.791	2.99646e-10	Heart2	Ubl7
1.88103e-14	0.32847	0.989	0.996	3.0659e-10	Heart2	Pfdn5
2.07565e-14	-0.359164	0.892	0.983	3.38311e-10	Heart2	Rras2
2.11673e-14	-0.270113	0.688	0.905	3.45006e-10	Heart2	Pvrl3
2.40383e-14	-0.810402	0.849	0.933	3.91801e-10	Heart2	Fhl1
2.46196e-14	0.455017	0.914	0.935	4.01275e-10	Heart2	Pmm1
2.46527e-14	0.37983	0.968	0.956	4.01814e-10	Heart2	Rsrp1
2.59762e-14	0.608887	0.849	0.612	4.23387e-10	Heart2	Procr
3.08384e-14	0.295374	0.914	0.727	5.02635e-10	Heart2	Atg101
3.21703e-14	-0.344732	1	1	5.24344e-10	Heart2	Cald1
3.5299e-14	0.403866	1	0.988	5.75338e-10	Heart2	Ctnnb1
3.55741e-14	0.256265	1	0.996	5.79823e-10	Heart2	Bsg
3.77443e-14	0.286322	0.989	0.991	6.15195e-10	Heart2	Sdcbp
4.2704e-14	-0.378569	1	1	6.96032e-10	Heart2	Serpinh1
4.38214e-14	-0.251946	0.871	0.964	7.14246e-10	Heart2	Cyb5b
4.67783e-14	0.303059	0.946	0.87	7.6244e-10	Heart2	Cmtm3
4.86716e-14	-0.536921	0.989	0.986	7.93298e-10	Heart2	Anxa1
4.94045e-14	0.363738	1	0.972	8.05245e-10	Heart2	Ergic3
5.00945e-14	0.316939	0.914	0.802	8.16491e-10	Heart2	Mpzl1
5.03449e-14	0.307321	0.634	0.339	8.20571e-10	Heart2	Renbp
5.17241e-14	0.323279	0.763	0.402	8.43051e-10	Heart2	Frzb
5.43856e-14	0.531179	0.925	0.79	8.86431e-10	Heart2	Blvrb
5.82493e-14	-0.405536	0.441	0.793	9.49405e-10	Heart2	Adamts5
5.87529e-14	-0.269483	0.849	0.976	9.57613e-10	Heart2	Nadk
5.88238e-14	-0.386718	1	0.997	9.5877e-10	Heart2	Ran
6.53923e-14	0.385663	0.849	0.563	1.06583e-09	Heart2	Cxcl16
7.22287e-14	-0.265932	1	0.987	1.17726e-09	Heart2	Emc6
7.47565e-14	-0.366869	0.978	0.994	1.21846e-09	Heart2	Ppp1r14b
7.49477e-14	0.301282	1	0.997	1.22157e-09	Heart2	Aldoa
7.54791e-14	0.312932	0.935	0.777	1.23023e-09	Heart2	Tspan17
7.63487e-14	0.287374	0.72	0.443	1.24441e-09	Heart2	Slc12a2
8.39248e-14	-0.330234	0.989	0.997	1.36789e-09	Heart2	Snrpf
8.64736e-14	0.319029	0.742	0.543	1.40943e-09	Heart2	Gstp1
9.65062e-14	0.285009	0.903	0.769	1.57295e-09	Heart2	Coq7
1.07179e-13	-0.282235	1	1	1.74691e-09	Heart2	Rps26
1.10466e-13	-0.295966	0.935	0.987	1.80049e-09	Heart2	Cnih1
1.14816e-13	-0.349972	0.72	0.866	1.87138e-09	Heart2	Adam19
1.60818e-13	-0.289163	1	1	2.62118e-09	Heart2	Rps20
1.67459e-13	-0.428121	0.14	0.513	2.72941e-09	Heart2	Grem2
1.7273e-13	-0.332368	0.968	0.987	2.81532e-09	Heart2	Srsf2
1.7383e-13	-0.345746	1	0.999	2.83326e-09	Heart2	Myl6
1.87226e-13	0.734959	0.366	0.12	3.05159e-09	Heart2	Apoe
1.95332e-13	0.252309	0.806	0.619	3.18372e-09	Heart2	Cbr1
2.16663e-13	-0.29523	0.989	0.991	3.53139e-09	Heart2	Hdlbp
2.34683e-13	-0.45164	0.978	0.992	3.8251e-09	Heart2	Ccnd2
2.36893e-13	-0.281673	0.731	0.925	3.86112e-09	Heart2	Celf2
2.45463e-13	-0.304856	1	0.999	4.0008e-09	Heart2	Dynll1
2.52185e-13	0.32664	0.882	0.828	4.11037e-09	Heart2	Pld3
2.69018e-13	0.826746	0.613	0.324	4.38472e-09	Heart2	Gsta4
2.71177e-13	-0.385689	1	0.997	4.41992e-09	Heart2	Abracl
2.72209e-13	0.26422	0.968	0.903	4.43673e-09	Heart2	Yipf3
2.76023e-13	-0.271223	0.075	0.473	4.4989e-09	Heart2	Hoxc9
2.8289e-13	0.307675	0.978	0.997	4.61083e-09	Heart2	Ndufa1
2.84497e-13	0.268594	0.957	0.905	4.63701e-09	Heart2	Coro1b
2.85555e-13	-0.268493	0.892	0.98	4.65426e-09	Heart2	Bola3
2.90012e-13	-0.29928	1	1	4.72691e-09	Heart2	Tpm4
3.30382e-13	-0.29606	0.989	0.993	5.3849e-09	Heart2	Lrrc59
3.44134e-13	0.281953	1	0.982	5.60904e-09	Heart2	Bcap31
3.51925e-13	-0.35467	0.957	0.991	5.73602e-09	Heart2	Srsf3
3.57208e-13	-0.695839	1	1	5.82213e-09	Heart2	Actb
3.68064e-13	0.26963	1	0.952	5.99907e-09	Heart2	Atp6ap1
3.68133e-13	0.273446	0.957	0.97	6.00021e-09	Heart2	Sdf4
4.13411e-13	0.347413	0.774	0.583	6.73819e-09	Heart2	Nedd9
4.23288e-13	-0.308149	0.581	0.875	6.89917e-09	Heart2	Steap2
4.44204e-13	0.277076	0.871	0.648	7.24008e-09	Heart2	Ephx1
4.47572e-13	0.384613	0.892	0.886	7.29498e-09	Heart2	Fkbp7
4.49493e-13	0.27963	0.968	0.928	7.32628e-09	Heart2	Scp2
4.72936e-13	-0.292895	0.355	0.746	7.70838e-09	Heart2	Siglecg
4.78778e-13	-0.329055	0.086	0.471	7.80361e-09	Heart2	Hoxc10
4.81525e-13	0.252111	0.978	0.945	7.84837e-09	Heart2	Txndc15
5.86104e-13	0.351439	0.882	0.82	9.55291e-09	Heart2	Agpat4
5.88132e-13	0.31779	0.957	0.884	9.58596e-09	Heart2	Tspan6
6.22723e-13	0.260175	0.828	0.729	1.01498e-08	Heart2	Tmem98
6.92195e-13	0.285885	0.946	0.916	1.12821e-08	Heart2	Apoa1bp
8.04579e-13	-0.299711	0.946	0.978	1.31138e-08	Heart2	Ap2a2
9.26692e-13	0.442863	0.86	0.696	1.51042e-08	Heart2	Emilin1
9.98118e-13	0.26251	0.935	0.822	1.62683e-08	Heart2	Carkd
1.02547e-12	0.306053	0.774	0.554	1.67141e-08	Heart2	Hbp1
1.0938e-12	-0.313088	0.925	0.969	1.78279e-08	Heart2	Srsf7
1.11171e-12	0.417225	0.839	0.728	1.81198e-08	Heart2	Idh1
1.17475e-12	-0.518789	1	1	1.91472e-08	Heart2	Serpine1
1.26616e-12	-0.29875	0.968	0.984	2.06371e-08	Heart2	Pea15a
1.35174e-12	-0.321448	0.978	0.998	2.2032e-08	Heart2	Ccng1
1.39823e-12	0.378551	0.978	0.994	2.27897e-08	Heart2	Cpe
1.47451e-12	-0.473425	0.258	0.606	2.4033e-08	Heart2	Fgf7
1.49947e-12	0.274656	0.989	0.984	2.44399e-08	Heart2	Serinc1
1.53251e-12	-0.332633	0.989	1	2.49783e-08	Heart2	Tmsb10
1.54602e-12	-1.62572	0.892	0.944	2.51985e-08	Heart2	Spp1
2.2723e-12	0.300843	1	1	3.70363e-08	Heart2	Npc2
2.38392e-12	0.270647	0.989	0.939	3.88556e-08	Heart2	Supt4a
2.73187e-12	0.278069	0.935	0.892	4.45268e-08	Heart2	Adh5
2.92615e-12	-0.319515	0.978	0.983	4.76934e-08	Heart2	Pdlim1
3.09124e-12	0.548896	0.28	0.074	5.03841e-08	Heart2	Cd93
3.11568e-12	-0.267029	0.796	0.909	5.07825e-08	Heart2	Lyar
3.21484e-12	-0.267923	0.989	0.997	5.23987e-08	Heart2	Wdr1
3.30406e-12	0.275319	0.925	0.957	5.38528e-08	Heart2	Spg21
3.35168e-12	0.264932	0.871	0.702	5.4629e-08	Heart2	Dcaf13
3.57584e-12	0.317128	0.785	0.482	5.82826e-08	Heart2	Ltbp4
3.58093e-12	-0.462388	0.957	0.982	5.83656e-08	Heart2	Akap12
4.78914e-12	0.280748	0.763	0.606	7.80583e-08	Heart2	Amdhd2
4.94347e-12	-0.254166	0.925	0.978	8.05737e-08	Heart2	Cisd1
5.02643e-12	0.344058	0.86	0.619	8.19258e-08	Heart2	Heg1
5.50475e-12	-0.394087	0.505	0.762	8.97219e-08	Heart2	Col11a1
5.5856e-12	0.836798	0.817	0.694	9.10397e-08	Heart2	Tubb3
5.68062e-12	0.714961	0.871	0.701	9.25884e-08	Heart2	Vcam1
5.70919e-12	-0.305122	0.989	0.991	9.30541e-08	Heart2	Snrpd1
5.80231e-12	-0.317037	0.828	0.973	9.45718e-08	Heart2	Bdnf
6.16972e-12	0.302035	0.968	0.917	1.0056e-07	Heart2	Myl12b
6.36778e-12	0.264465	1	0.937	1.03788e-07	Heart2	Adrm1
6.43517e-12	-0.267096	0.978	0.99	1.04887e-07	Heart2	Mprip
6.45983e-12	-0.2966	0.731	0.911	1.05289e-07	Heart2	Col12a1
6.57591e-12	0.268614	0.968	0.887	1.07181e-07	Heart2	Frg1
6.94115e-12	0.317613	0.871	0.67	1.13134e-07	Heart2	Dcxr
6.99571e-12	0.345122	0.785	0.599	1.14023e-07	Heart2	Dclk1
8.0836e-12	0.33617	1	0.987	1.31755e-07	Heart2	Mfge8
8.75353e-12	-0.411613	0.118	0.474	1.42674e-07	Heart2	Sox11
1.02388e-11	-0.380737	0.978	0.995	1.66882e-07	Heart2	Zyx
1.03776e-11	0.279484	0.538	0.273	1.69145e-07	Heart2	Pde1a
1.12678e-11	0.468217	0.882	0.879	1.83653e-07	Heart2	Rnase4
1.18563e-11	0.252378	0.978	0.97	1.93246e-07	Heart2	Sod1
1.2821e-11	0.276919	0.774	0.508	2.0897e-07	Heart2	Gfpt2
1.41232e-11	-0.282119	0.892	0.968	2.30194e-07	Heart2	Srm
1.46146e-11	0.315217	0.957	0.909	2.38203e-07	Heart2	Nfe2l2
1.57119e-11	-0.281923	0.699	0.886	2.56089e-07	Heart2	H2afx
1.64641e-11	-0.257448	1	0.999	2.68348e-07	Heart2	Nme1
2.08505e-11	-0.251584	0.903	0.957	3.39843e-07	Heart2	Pole4
2.12872e-11	0.259724	1	0.997	3.46961e-07	Heart2	Selk
2.27229e-11	-0.305916	0.667	0.833	3.70361e-07	Heart2	Rrm1
2.53155e-11	0.279906	0.978	0.978	4.12617e-07	Heart2	Saraf
2.56038e-11	-0.38797	0.86	0.943	4.17317e-07	Heart2	Nrp1
2.59842e-11	0.283321	0.903	0.84	4.23517e-07	Heart2	Atp6v1h
2.62003e-11	0.31915	0.978	0.985	4.27038e-07	Heart2	Vat1
2.7153e-11	0.253465	0.871	0.746	4.42567e-07	Heart2	Psme1
2.84378e-11	-0.252264	0.57	0.821	4.63508e-07	Heart2	Epb41l3
3.01198e-11	-0.355699	0.839	0.921	4.90923e-07	Heart2	Tes
3.06222e-11	0.658373	0.785	0.53	4.99111e-07	Heart2	Ptx3
3.09793e-11	0.440197	0.925	0.875	5.04932e-07	Heart2	Efhd2
3.17154e-11	-0.265086	1	0.997	5.16929e-07	Heart2	Arpc5
3.89127e-11	-0.30996	0.215	0.569	6.34238e-07	Heart2	Tpx2
3.93639e-11	-0.276689	0.968	0.984	6.41593e-07	Heart2	Nucks1
4.13815e-11	0.307883	0.935	0.938	6.74477e-07	Heart2	Wwtr1
4.73592e-11	-0.481726	0.989	0.999	7.71908e-07	Heart2	Rpl22l1
4.95436e-11	0.291292	0.978	0.929	8.07511e-07	Heart2	Tgoln1
5.04309e-11	-0.267214	0.978	0.984	8.21974e-07	Heart2	Itgav
5.29425e-11	1.72109	0.968	0.904	8.6291e-07	Heart2	Ctla2a
5.29824e-11	0.270292	0.989	0.982	8.63559e-07	Heart2	Rab11a
5.41117e-11	0.618103	0.624	0.426	8.81967e-07	Heart2	Olfml3
5.86372e-11	-0.371148	0.14	0.489	9.55728e-07	Heart2	Gm2115
6.22282e-11	0.349472	0.882	0.906	1.01426e-06	Heart2	Aga
6.5324e-11	-0.513765	0.968	0.99	1.06472e-06	Heart2	Csf1
7.07906e-11	-0.267669	1	1	1.15382e-06	Heart2	Serbp1
7.21659e-11	-0.494162	0.667	0.855	1.17623e-06	Heart2	Sdpr
8.1004e-11	0.318757	0.645	0.411	1.32028e-06	Heart2	Mmp11
8.14999e-11	-0.256376	0.871	0.966	1.32837e-06	Heart2	Smc6
8.57466e-11	-0.298248	0.667	0.872	1.39758e-06	Heart2	Ugcg
9.10252e-11	-0.257946	0.183	0.525	1.48362e-06	Heart2	Lmod1
9.53447e-11	0.286934	0.989	0.996	1.55402e-06	Heart2	1810058I24Rik
9.96116e-11	0.272199	0.978	0.971	1.62357e-06	Heart2	Ptov1
1.04342e-10	0.251624	1	0.968	1.70067e-06	Heart2	Itm2c
1.15304e-10	-0.260175	0.989	0.998	1.87934e-06	Heart2	Hnrnpab
1.18135e-10	-0.533428	1	1	1.92548e-06	Heart2	Thbs1
1.26344e-10	-0.329251	1	0.999	2.05927e-06	Heart2	Ncl
1.26456e-10	0.255435	0.989	0.978	2.06111e-06	Heart2	Cope
1.35308e-10	-0.640047	0.849	0.957	2.20539e-06	Heart2	Ptgs2
1.53095e-10	0.526021	0.968	0.984	2.4953e-06	Heart2	Txndc5
1.59462e-10	0.251011	0.925	0.886	2.59907e-06	Heart2	Camk1
1.77877e-10	0.382251	0.989	0.943	2.89922e-06	Heart2	Ugdh
1.93767e-10	0.358874	0.882	0.853	3.15821e-06	Heart2	Gstm5
2.1723e-10	0.251804	0.645	0.336	3.54064e-06	Heart2	Hsd11b1
2.19851e-10	-0.281454	0.871	0.945	3.58336e-06	Heart2	Snx7
2.28508e-10	-0.324728	0.495	0.784	3.72446e-06	Heart2	Lurap1l
2.45413e-10	-0.295535	0.914	0.966	3.99999e-06	Heart2	Dtymk
2.60212e-10	0.25801	0.989	0.993	4.24119e-06	Heart2	Sec62
2.65045e-10	-0.328096	1	1	4.31996e-06	Heart2	S100a6
2.83136e-10	0.331192	0.946	0.885	4.61484e-06	Heart2	Ifi27
3.08288e-10	-0.514347	1	0.984	5.02478e-06	Heart2	Col1a1
3.11827e-10	0.380146	0.978	0.9	5.08247e-06	Heart2	Creb3l2
3.13921e-10	0.500482	0.935	0.868	5.1166e-06	Heart2	Uchl1
3.42018e-10	0.516322	0.946	0.97	5.57456e-06	Heart2	Itgb5
3.42102e-10	-0.42746	0.849	0.927	5.57592e-06	Heart2	Ivns1abp
3.75643e-10	-0.295252	0.914	0.98	6.12261e-06	Heart2	Slc6a6
4.03235e-10	0.363506	0.591	0.304	6.57233e-06	Heart2	Car8
4.96004e-10	0.28274	0.978	0.971	8.08436e-06	Heart2	Shisa5
5.26767e-10	0.402018	0.796	0.739	8.58578e-06	Heart2	Ddah2
5.28845e-10	0.358263	0.914	0.832	8.61964e-06	Heart2	Trim47
5.76714e-10	0.267075	0.935	0.928	9.39986e-06	Heart2	1110008P14Rik
7.97783e-10	-0.719675	0.505	0.768	1.30031e-05	Heart2	Plac8
8.11132e-10	0.254649	0.871	0.725	1.32206e-05	Heart2	Ero1l
8.66537e-10	0.27531	0.935	0.838	1.41237e-05	Heart2	Pam
9.2087e-10	0.468612	0.946	0.842	1.50093e-05	Heart2	Tcf4
9.24665e-10	0.559681	0.882	0.933	1.50711e-05	Heart2	Cebpb
1.00002e-09	0.269492	0.871	0.777	1.62994e-05	Heart2	Cd302
1.00838e-09	-0.32563	0.312	0.618	1.64355e-05	Heart2	Fam111a
1.02701e-09	0.335401	0.989	0.953	1.67393e-05	Heart2	Gltscr2
1.21997e-09	0.290631	0.29	0.096	1.98842e-05	Heart2	Mmrn2
1.23942e-09	0.260421	0.935	0.834	2.02013e-05	Heart2	Mxra7
1.31736e-09	-0.341882	0.989	0.995	2.14716e-05	Heart2	Myh9
1.33172e-09	0.260246	0.946	0.77	2.17057e-05	Heart2	Arhgap31
1.38304e-09	-0.291994	0.634	0.825	2.25422e-05	Heart2	Fkbp11
1.50148e-09	-0.290619	0.817	0.921	2.44726e-05	Heart2	Atf5
1.71962e-09	0.570725	1	0.984	2.80281e-05	Heart2	Sat1
1.74548e-09	0.350883	0.935	0.932	2.84495e-05	Heart2	Zfand5
2.03243e-09	-0.597829	0.989	0.998	3.31266e-05	Heart2	Timp1
2.13736e-09	0.671977	0.849	0.74	3.48368e-05	Heart2	Postn
2.58451e-09	-0.264334	0.172	0.461	4.21249e-05	Heart2	Has2
2.59452e-09	-0.274452	0.892	0.957	4.22881e-05	Heart2	Map1b
2.95969e-09	-0.263737	0.871	0.951	4.82399e-05	Heart2	Ppa1
4.18625e-09	-0.299314	0.946	0.98	6.82316e-05	Heart2	Lasp1
4.40878e-09	0.291871	0.871	0.72	7.18587e-05	Heart2	Igf2r
4.44154e-09	-0.455084	0.441	0.682	7.23926e-05	Heart2	Rrm2
4.47191e-09	0.277382	0.634	0.446	7.28877e-05	Heart2	Ttll5
4.5528e-09	-0.263453	0.989	0.997	7.42061e-05	Heart2	P4hb
4.68744e-09	-0.277199	0.892	0.922	7.64005e-05	Heart2	Mllt11
4.99202e-09	0.262508	0.452	0.226	8.13649e-05	Heart2	Mfap2
5.00371e-09	-0.336242	0.43	0.676	8.15555e-05	Heart2	Npnt
5.09644e-09	-0.32748	0.473	0.725	8.30668e-05	Heart2	Klhdc8a
5.22903e-09	0.27577	0.978	0.946	8.52279e-05	Heart2	Aplp2
5.25306e-09	-0.359395	0.903	0.944	8.56196e-05	Heart2	Fbn1
5.63892e-09	0.338489	0.989	0.987	9.19088e-05	Heart2	Atp1a1
7.29272e-09	0.315472	0.484	0.251	0.000118864	Heart2	Ch25h
7.33036e-09	0.305953	0.892	0.878	0.000119477	Heart2	Lxn
7.51977e-09	0.473019	0.882	0.787	0.000122565	Heart2	Srxn1
8.11237e-09	0.424282	0.677	0.453	0.000132224	Heart2	Gadd45a
8.19166e-09	-0.594091	0.183	0.47	0.000133516	Heart2	Grem1
9.73404e-09	-0.283192	0.495	0.752	0.000158655	Heart2	Gja1
9.93615e-09	-0.281484	0.774	0.902	0.000161949	Heart2	Lsm3
9.95233e-09	0.329125	0.677	0.476	0.000162213	Heart2	Fas
1.06756e-08	-0.303127	0.946	0.979	0.000174001	Heart2	Myadm
1.20615e-08	0.2923	1	0.995	0.000196591	Heart2	Tspo
1.35425e-08	0.310561	0.774	0.624	0.000220729	Heart2	Htra1
1.47249e-08	-0.297633	0.978	0.998	0.000240002	Heart2	Tnfrsf12a
1.51073e-08	0.568598	0.968	0.927	0.000246235	Heart2	Gclm
1.53104e-08	-0.281248	1	0.997	0.000249544	Heart2	Set
1.8647e-08	0.255439	0.957	0.904	0.000303927	Heart2	2810428I15Rik
2.38202e-08	0.437932	0.785	0.669	0.000388246	Heart2	Smad6
2.38942e-08	0.296918	0.828	0.865	0.000389451	Heart2	Inppl1
2.41184e-08	0.268503	0.376	0.17	0.000393106	Heart2	Dpt
2.53435e-08	0.911037	0.817	0.721	0.000413074	Heart2	Tnnt2
2.90142e-08	-0.258437	0.452	0.679	0.000472902	Heart2	Egfr
2.95572e-08	0.486755	0.892	0.884	0.000481753	Heart2	Pdlim2
3.62877e-08	-0.260949	0.871	0.97	0.000591453	Heart2	Amotl2
4.15372e-08	0.369355	0.968	0.972	0.000677015	Heart2	Capg
4.40129e-08	-0.465694	0.688	0.8	0.000717366	Heart2	Serpinf1
4.5067e-08	-0.26555	0.978	0.986	0.000734547	Heart2	Ckap4
4.59273e-08	-0.258865	0.978	0.998	0.000748569	Heart2	Ngfrap1
4.74593e-08	-0.276129	0.441	0.657	0.000773539	Heart2	Cenpw
4.8054e-08	0.643051	0.86	0.847	0.000783233	Heart2	Mt2
5.17021e-08	-0.351941	0.925	0.944	0.000842693	Heart2	Plaur
5.42874e-08	-0.402479	0.914	0.982	0.00088483	Heart2	Phlda1
6.06987e-08	0.287409	1	0.991	0.000989329	Heart2	Psmb6
6.83264e-08	-0.269729	0.075	0.352	0.00111365	Heart2	Dkk2
7.62543e-08	0.256892	0.978	0.982	0.00124287	Heart2	Jund
8.00303e-08	0.324576	1	1	0.00130441	Heart2	Tagln2
8.12089e-08	0.312223	0.796	0.747	0.00132362	Heart2	Pcgf5
8.48983e-08	-0.672087	0.828	0.932	0.00138376	Heart2	Ly6e
9.62144e-08	-0.347482	0.839	0.933	0.0015682	Heart2	Pdpn
9.89077e-08	0.282118	0.946	0.871	0.0016121	Heart2	Nfib
1.11891e-07	-0.320259	0.419	0.672	0.00182371	Heart2	Ptgs1
1.33425e-07	-0.305112	1	0.999	0.0021747	Heart2	S100a10
1.37018e-07	2.03545	0.28	0.111	0.00223326	Heart2	Emcn
1.4168e-07	0.392372	0.796	0.712	0.00230925	Heart2	B4galt5
1.47382e-07	0.464074	0.935	0.933	0.00240218	Heart2	Ckb
1.62067e-07	-0.300507	0.935	0.992	0.00264153	Heart2	Cryab
1.72269e-07	-0.268814	0.849	0.932	0.00280782	Heart2	Dlc1
2.10133e-07	-0.633042	0.215	0.47	0.00342495	Heart2	Actg2
2.18925e-07	-0.572199	0.247	0.493	0.00356826	Heart2	2810417H13Rik
2.34795e-07	-0.276109	0.237	0.477	0.00382692	Heart2	Aif1l
2.38278e-07	-0.259056	0.796	0.875	0.00388369	Heart2	Grb10
2.5634e-07	-0.287623	0.505	0.691	0.00417808	Heart2	Nt5dc2
2.60763e-07	0.26793	0.957	0.962	0.00425018	Heart2	Slc38a2
2.97292e-07	0.322687	0.882	0.836	0.00484556	Heart2	Pxdn
3.04874e-07	-0.382417	0.968	0.982	0.00496915	Heart2	Col1a2
3.77947e-07	-0.303063	0.183	0.43	0.00616016	Heart2	Prc1
3.90091e-07	0.302185	1	0.999	0.00635809	Heart2	Fn1
4.68538e-07	0.311827	0.688	0.57	0.00763669	Heart2	Ptgr1
5.27486e-07	-0.289049	0.989	0.995	0.0085975	Heart2	Hspa5
5.32008e-07	-0.366551	0.204	0.461	0.0086712	Heart2	Krt19
6.30344e-07	-0.436063	0.774	0.923	0.010274	Heart2	F3
7.03611e-07	0.288184	0.355	0.606	0.0114682	Heart2	Ccl7
7.30948e-07	-0.504856	0.376	0.581	0.0119137	Heart2	Ube2c
7.62916e-07	-0.341643	0.86	0.937	0.0124348	Heart2	Itga5
8.27911e-07	-0.313105	0.645	0.818	0.0134941	Heart2	Lrrc32
8.72673e-07	-0.261555	1	0.991	0.0142237	Heart2	Eif4ebp1
9.39904e-07	-0.300464	1	0.999	0.0153195	Heart2	Hsp90b1
1.02205e-06	-0.251462	0.742	0.862	0.0166583	Heart2	Dek
1.12713e-06	0.286053	0.914	0.937	0.0183711	Heart2	Anp32a
1.18176e-06	0.442909	1	0.987	0.0192616	Heart2	Cyb5a
1.28557e-06	-0.360583	0.097	0.34	0.0209536	Heart2	Il1rl1
1.47803e-06	0.306986	1	1	0.0240905	Heart2	Sparc
1.50477e-06	0.521781	0.742	0.67	0.0245263	Heart2	Nqo1
1.55469e-06	-0.275615	0.527	0.735	0.0253399	Heart2	Tnfrsf11b
2.04903e-06	-0.37421	0.538	0.696	0.0333971	Heart2	Thbs2
2.10231e-06	0.350266	0.925	0.809	0.0342656	Heart2	Jam2
2.16119e-06	-0.310297	0.613	0.752	0.0352253	Heart2	Cks2
2.46723e-06	-0.269585	0.849	0.932	0.0402133	Heart2	Loxl2
2.54019e-06	-0.250776	0.14	0.363	0.0414025	Heart2	Ccna2
2.98232e-06	0.288737	1	0.995	0.0486089	Heart2	Atp6v1g1
3.80054e-06	-0.344144	0.645	0.842	0.061945	Heart2	Cyp1b1
4.16822e-06	0.548926	0.989	0.981	0.0679378	Heart2	Hist1h2bc
4.50397e-06	0.808738	0.398	0.21	0.0734102	Heart2	Bmp4
4.64029e-06	0.275064	0.882	0.86	0.0756321	Heart2	Ptgis
4.7028e-06	-0.253782	0.226	0.449	0.0766509	Heart2	Cdca3
4.92739e-06	-0.254107	0.946	0.987	0.0803116	Heart2	Tubb6
5.69946e-06	0.394525	1	1	0.0928955	Heart2	Malat1
6.05773e-06	0.254615	0.849	0.695	0.0987349	Heart2	H2-K1
6.51361e-06	-0.357487	0.871	0.91	0.106165	Heart2	2200002D01Rik
7.51483e-06	0.257302	0.989	0.98	0.122484	Heart2	Zbtb20
8.61976e-06	-0.464826	0.398	0.576	0.140493	Heart2	Birc5
9.08857e-06	0.319078	0.882	0.854	0.148135	Heart2	Pla2g12a
9.63136e-06	0.378174	0.989	0.963	0.156982	Heart2	Nid1
1.09012e-05	-0.250332	0.935	0.977	0.177678	Heart2	Fscn1
1.09013e-05	0.300237	0.946	0.955	0.17768	Heart2	Unc5b
1.39998e-05	0.285885	0.398	0.217	0.228183	Heart2	Asb5
1.53738e-05	-0.346813	0.527	0.695	0.250577	Heart2	Igfbp6
1.75205e-05	0.265521	0.839	0.803	0.285567	Heart2	Nav1
1.77898e-05	-0.30617	0.925	0.974	0.289956	Heart2	Timp3
1.82547e-05	-0.348991	0.892	0.92	0.297534	Heart2	2700094K13Rik
2.12024e-05	0.270585	0.989	0.967	0.345577	Heart2	Lmo4
2.15583e-05	-0.254008	0.667	0.766	0.351379	Heart2	Fabp5
2.21532e-05	-0.274511	0.226	0.433	0.361075	Heart2	Cdc20
2.28754e-05	-0.421696	0.667	0.767	0.372846	Heart2	Cotl1
2.58142e-05	-0.377508	0.398	0.574	0.420745	Heart2	Prrx2
2.82643e-05	0.307081	0.935	0.94	0.460679	Heart2	Fgfr1
2.86752e-05	0.274929	0.409	0.226	0.467378	Heart2	Ucp2
3.74699e-05	-0.370799	0.247	0.433	0.610722	Heart2	Top2a
3.94958e-05	0.276448	0.957	0.947	0.643742	Heart2	Mical2
4.18945e-05	-0.295115	0.43	0.597	0.682839	Heart2	Cdk1
4.56151e-05	0.274724	0.312	0.163	0.743481	Heart2	Fabp4
4.7588e-05	0.271823	0.774	0.67	0.775637	Heart2	Ece1
6.35752e-05	0.459931	0.968	0.971	1	Heart2	Sox4
6.55484e-05	1.23959	0.559	0.467	1	Heart2	Edn1
6.96145e-05	-0.266305	0.849	0.906	1	Heart2	Col3a1
6.96353e-05	-0.483098	0.839	0.763	1	Heart2	Clu
7.62881e-05	-0.281471	0.989	0.987	1	Heart2	Kdelr2
8.69761e-05	0.494026	0.602	0.435	1	Heart2	Nr4a1
0.000104154	-0.297593	0.237	0.409	1	Heart2	Col6a3
0.000108776	0.288733	0.538	0.428	1	Heart2	Fam46a
0.00012714	0.341187	0.849	0.768	1	Heart2	Ass1
0.000131442	0.477598	0.925	0.837	1	Heart2	Id2
0.000167511	-0.283883	0.946	0.962	1	Heart2	Emp1
0.000174403	-0.348513	0.333	0.501	1	Heart2	Cenpa
0.000186583	-0.337487	0.731	0.859	1	Heart2	Meg3
0.000197173	0.945242	0.441	0.291	1	Heart2	Egfl7
0.0002043	0.280717	0.731	0.731	1	Heart2	Angptl2
0.000224722	-0.288268	0.419	0.561	1	Heart2	Hmgb2
0.00025235	0.311208	0.656	0.513	1	Heart2	Ctla2b
0.00026166	0.304212	0.989	0.986	1	Heart2	Cdkn1a
0.000267718	-0.329316	0.398	0.56	1	Heart2	Plscr2
0.000283244	0.259592	1	0.999	1	Heart2	Timp2
0.000379358	-0.276331	0.516	0.622	1	Heart2	Smc2
0.000400346	0.31897	0.968	0.994	1	Heart2	Id3
0.000411598	-0.418354	0.839	0.85	1	Heart2	Col8a1
0.000546701	0.423582	0.935	0.953	1	Heart2	Slc3a2
0.000836987	-0.616549	0.312	0.475	1	Heart2	Il11
0.00087036	-0.472798	0.215	0.373	1	Heart2	Sfn
0.000969592	0.255679	0.989	0.997	1	Heart2	S100a4
0.00117083	0.300508	0.882	0.881	1	Heart2	Hist1h1c
0.00126958	0.688647	0.452	0.324	1	Heart2	Ecscr
0.00142846	0.352137	0.968	0.983	1	Heart2	Neat1
0.00153511	0.406915	0.409	0.296	1	Heart2	Mdk
0.00204775	0.314818	0.548	0.423	1	Heart2	Bst2
0.00234341	0.269978	0.925	0.89	1	Heart2	H1f0
0.00309976	0.256695	0.935	0.958	1	Heart2	Ppp3ca
0.00646672	-0.990498	0.14	0.254	1	Heart2	Krt8
0.00772705	-0.435167	0.495	0.615	1	Heart2	Wisp2
0.0114952	0.285194	0.376	0.291	1	Heart2	Fam43a
0.0149899	0.304078	0.516	0.438	1	Heart2	Serpinb9b
0.0209544	0.398153	0.903	0.8	1	Heart2	Cxcl12
0.026344	1.41302	0.495	0.615	1	Heart2	Ccl2
0.035224	-0.270917	0.258	0.345	1	Heart2	A330069E16Rik
0.0415786	0.587469	0.86	0.906	1	Heart2	Hmox1
0.0416796	0.279145	0.796	0.716	1	Heart2	Mustn1
0.0423069	0.303993	0.925	0.895	1	Heart2	Cthrc1
0.0464313	0.252932	0.269	0.204	1	Heart2	S1pr1
0.046507	-0.508066	0.968	0.99	1	Heart2	Tsc22d1
0.0573078	0.320224	1	0.999	1	Heart2	Dbi
0.0983775	0.407356	0.172	0.278	1	Heart2	Pgf
0.111643	0.405301	0.849	0.898	1	Heart2	Lgals3
0.13189	0.284119	0.978	0.951	1	Heart2	Csrp2
0.219132	0.794622	0.989	0.995	1	Heart2	Tm4sf1
0.228184	0.349501	0.688	0.647	1	Heart2	Ddit3
0.281856	0.342045	0.935	0.983	1	Heart2	Ankrd1
0.329221	0.351256	0.645	0.638	1	Heart2	Adm
0.385101	-0.34684	0.548	0.586	1	Heart2	Igfbp4
0.490083	0.400846	1	1	1	Heart2	Fkbp1a
0.50363	1.94115	0.258	0.321	1	Heart2	Esm1
0.555667	-0.386448	0.419	0.43	1	Heart2	Gdf15
0.589116	-0.445508	0.29	0.321	1	Heart2	Spint2
0.867932	-0.892902	0.387	0.367	1	Heart2	Krt18
0.905561	0.256132	0.28	0.287	1	Heart2	Sprr1a
0.980007	-0.649438	0.581	0.575	1	Heart2	Ly6a
0.997331	0.32077	0.946	0.941	1	Heart2	Mgp

## Sheet: Hoxb13_Tail 
p_val	avg_logFC	pct.1	pct.2	p_val_adj	cluster	gene
2.15719e-159	0.387525	0.823	0.02	3.51601e-155	Hoxb13_Tail	Hoxb13
3.96655e-93	0.29214	0.542	0.018	6.46508e-89	Hoxb13_Tail	Abi3bp
1.04672e-79	0.373759	0.792	0.1	1.70605e-75	Hoxb13_Tail	Hoxc13
3.24192e-65	1.4792	0.938	0.262	5.28401e-61	Hoxb13_Tail	Il1rl1
2.23801e-64	0.337552	0.677	0.087	3.64773e-60	Hoxb13_Tail	Edil3
9.57194e-63	0.278273	0.635	0.076	1.56013e-58	Hoxb13_Tail	Rab3b
4.07777e-58	1.24371	0.958	0.414	6.64636e-54	Hoxb13_Tail	Gm2115
5.61981e-58	1.22231	1	0.518	9.15972e-54	Hoxb13_Tail	Prrx2
3.09833e-56	1.53586	0.979	0.571	5.04996e-52	Hoxb13_Tail	Smoc2
3.58512e-55	2.12368	0.99	0.544	5.84339e-51	Hoxb13_Tail	Igfbp4
2.34607e-54	0.308223	0.552	0.062	3.82386e-50	Hoxb13_Tail	Ly6c1
1.40933e-53	1.0334	0.927	0.344	2.29706e-49	Hoxb13_Tail	Col6a3
1.40425e-48	0.902323	0.979	0.435	2.28878e-44	Hoxb13_Tail	Grem2
9.86614e-47	0.579894	0.781	0.192	1.60808e-42	Hoxb13_Tail	Anxa8
5.55352e-43	0.702348	0.979	0.697	9.05168e-39	Hoxb13_Tail	Oxr1
1.08406e-42	0.762749	0.979	0.707	1.76691e-38	Hoxb13_Tail	Angptl2
2.34418e-42	0.27195	0.594	0.112	3.82078e-38	Hoxb13_Tail	Gchfr
4.91212e-41	0.662997	0.969	0.532	8.00626e-37	Hoxb13_Tail	Lpar1
1.77088e-37	-0.769482	0.99	0.993	2.88635e-33	Hoxb13_Tail	Cpe
2.40256e-37	0.86845	0.979	0.707	3.91594e-33	Hoxb13_Tail	Gja1
1.21481e-36	0.253976	0.552	0.103	1.98002e-32	Hoxb13_Tail	Gm28875
1.95202e-36	0.438241	0.76	0.248	3.18161e-32	Hoxb13_Tail	Csgalnact1
2.39116e-36	0.656756	0.917	0.493	3.89735e-32	Hoxb13_Tail	Nrp2
4.20376e-35	0.315443	0.26	0.016	6.85171e-31	Hoxb13_Tail	Pcp4l1
5.2959e-35	0.294026	0.333	0.031	8.63179e-31	Hoxb13_Tail	Penk
9.00051e-35	0.903378	0.417	0.06	1.46699e-30	Hoxb13_Tail	Prg4
2.80734e-33	-0.601514	0.573	0.919	4.57568e-29	Hoxb13_Tail	Rab3ip
4.77782e-32	0.444038	0.906	0.528	7.78737e-28	Hoxb13_Tail	Gpc1
1.18815e-31	0.471154	0.875	0.374	1.93657e-27	Hoxb13_Tail	Col6a2
5.4436e-31	0.347205	0.74	0.258	8.87253e-27	Hoxb13_Tail	Col5a3
5.76874e-31	0.622739	0.958	0.68	9.40247e-27	Hoxb13_Tail	Klhdc8a
7.70001e-31	-2.33704	0.979	0.98	1.25502e-26	Hoxb13_Tail	Ankrd1
1.24336e-30	0.43464	0.927	0.542	2.02655e-26	Hoxb13_Tail	Ly6a
8.56473e-30	-0.752877	0.906	0.98	1.39596e-25	Hoxb13_Tail	Tns1
1.67957e-29	-1.05551	0.948	0.992	2.73753e-25	Hoxb13_Tail	Prss23
2.31749e-29	-0.744013	1	1	3.77728e-25	Hoxb13_Tail	Tmsb4x
3.20658e-29	-0.948735	0.646	0.882	5.2264e-25	Hoxb13_Tail	Ptgis
3.78101e-29	0.718524	0.948	0.846	6.16267e-25	Hoxb13_Tail	Ugcg
5.20639e-29	-1.22342	0.688	0.93	8.4859e-25	Hoxb13_Tail	Ctla2a
9.30795e-29	-0.939149	1	0.999	1.5171e-24	Hoxb13_Tail	Wbp5
1.52123e-28	0.364337	0.792	0.358	2.47945e-24	Hoxb13_Tail	Trps1
8.96053e-28	0.730941	1	0.771	1.46048e-23	Hoxb13_Tail	Serpinf1
2.30685e-27	0.595033	0.938	0.73	3.75994e-23	Hoxb13_Tail	Loxl3
3.90598e-27	0.618295	1	1	6.36635e-23	Hoxb13_Tail	Fth1
5.37696e-27	0.362372	0.667	0.22	8.7639e-23	Hoxb13_Tail	Kctd12
8.9002e-27	0.701421	0.99	0.981	1.45064e-22	Hoxb13_Tail	Cd44
2.01056e-26	0.752962	0.927	0.544	3.27701e-22	Hoxb13_Tail	Fgf7
3.7634e-26	0.614766	0.948	0.572	6.13396e-22	Hoxb13_Tail	Col6a1
3.9963e-26	-0.515149	0.917	0.981	6.51357e-22	Hoxb13_Tail	Anxa6
1.09017e-25	0.461494	1	0.94	1.77686e-21	Hoxb13_Tail	Nfix
1.43953e-25	0.863664	0.969	0.915	2.34629e-21	Hoxb13_Tail	Col5a1
3.57493e-25	-0.85087	1	1	5.82678e-21	Hoxb13_Tail	Igfbp7
5.31112e-25	-0.76735	1	1	8.6566e-21	Hoxb13_Tail	Tagln2
7.78977e-25	0.317483	0.812	0.366	1.26966e-20	Hoxb13_Tail	Sbsn
1.48247e-24	0.251176	0.75	0.322	2.41629e-20	Hoxb13_Tail	Zcchc24
2.01571e-24	0.581441	0.969	0.654	3.28541e-20	Hoxb13_Tail	Igfbp6
3.28736e-24	-0.493702	1	1	5.35807e-20	Hoxb13_Tail	Rhoc
3.47444e-24	0.304099	0.646	0.247	5.66299e-20	Hoxb13_Tail	Emilin2
5.11225e-24	0.642267	0.948	0.698	8.33246e-20	Hoxb13_Tail	Ank
6.38162e-24	0.498463	0.969	0.692	1.04014e-19	Hoxb13_Tail	Ccnd1
8.59041e-24	-0.479712	0.302	0.775	1.40015e-19	Hoxb13_Tail	Nes
1.03981e-23	0.457249	0.75	0.294	1.69479e-19	Hoxb13_Tail	Nrn1
1.17687e-23	0.619887	0.865	0.407	1.91818e-19	Hoxb13_Tail	Grem1
1.37491e-23	0.646958	1	0.877	2.24096e-19	Hoxb13_Tail	Aebp1
1.38039e-23	-0.630744	0.615	0.898	2.24989e-19	Hoxb13_Tail	Uchl1
4.75531e-23	0.910936	0.99	0.885	7.75068e-19	Hoxb13_Tail	Lgals3
1.0303e-22	0.557446	0.417	0.095	1.67929e-18	Hoxb13_Tail	Crabp1
1.06436e-22	-1.39359	0.781	0.918	1.7348e-18	Hoxb13_Tail	Rbp1
1.18071e-22	0.303141	0.417	0.093	1.92443e-18	Hoxb13_Tail	Fmod
1.59555e-22	-0.594239	1	0.999	2.60059e-18	Hoxb13_Tail	Tuba1a
1.60075e-22	-0.907413	1	0.996	2.60906e-18	Hoxb13_Tail	Ngfrap1
1.61759e-22	-0.412574	0.406	0.79	2.6365e-18	Hoxb13_Tail	Zdhhc2
2.06786e-22	0.489748	1	0.864	3.37041e-18	Hoxb13_Tail	Cav1
6.1779e-22	0.351779	0.854	0.451	1.00694e-17	Hoxb13_Tail	Prkg2
7.13045e-22	-0.69067	0.917	0.986	1.16219e-17	Hoxb13_Tail	Akap12
1.01947e-21	0.597239	0.99	0.914	1.66164e-17	Hoxb13_Tail	Sgk1
1.15604e-21	-0.578951	0.927	0.976	1.88423e-17	Hoxb13_Tail	F2r
1.20275e-21	0.35097	0.792	0.448	1.96035e-17	Hoxb13_Tail	Prkar2b
2.09356e-21	0.647071	0.948	0.739	3.41229e-17	Hoxb13_Tail	Ltbp2
2.79768e-21	-0.50445	0.688	0.929	4.55994e-17	Hoxb13_Tail	Tubb2b
3.93427e-21	-0.61043	0.792	0.934	6.41246e-17	Hoxb13_Tail	Myl12b
4.2478e-21	-0.725354	0.948	0.991	6.92349e-17	Hoxb13_Tail	Hspb1
7.35755e-21	-0.816089	0.854	0.936	1.19921e-16	Hoxb13_Tail	Lbh
2.5817e-20	0.439757	0.927	0.628	4.20791e-16	Hoxb13_Tail	Clmp
4.05253e-20	0.458268	0.99	0.98	6.60521e-16	Hoxb13_Tail	Efemp2
4.88287e-20	0.571845	1	0.875	7.95859e-16	Hoxb13_Tail	Hmga2
7.54244e-20	-0.574374	0.896	0.951	1.22934e-15	Hoxb13_Tail	Plk2
1.32212e-19	0.582412	1	0.998	2.15492e-15	Hoxb13_Tail	Rpl22l1
1.40498e-19	0.338934	0.917	0.632	2.28997e-15	Hoxb13_Tail	Slc5a3
2.10297e-19	-0.464708	0.99	0.998	3.42763e-15	Hoxb13_Tail	Cstb
2.43941e-19	-0.696976	0.25	0.683	3.97599e-15	Hoxb13_Tail	Tmem176b
3.4209e-19	0.466447	1	0.798	5.57573e-15	Hoxb13_Tail	Prrx1
5.25925e-19	-0.740193	0.583	0.879	8.57205e-15	Hoxb13_Tail	Cystm1
5.91096e-19	0.252616	1	1	9.63428e-15	Hoxb13_Tail	Rps18
8.82387e-19	0.390038	0.99	0.849	1.4382e-14	Hoxb13_Tail	Oaf
9.52945e-19	-0.37711	0.208	0.653	1.55321e-14	Hoxb13_Tail	Mcam
1.14857e-18	-0.405909	0.208	0.688	1.87206e-14	Hoxb13_Tail	Spry1
2.01891e-18	0.478962	0.969	0.802	3.29062e-14	Hoxb13_Tail	Cdkn2a
2.96903e-18	0.382653	1	0.908	4.83922e-14	Hoxb13_Tail	Avpi1
4.30798e-18	0.317416	0.979	0.867	7.02158e-14	Hoxb13_Tail	Esyt2
5.23617e-18	0.322218	0.896	0.704	8.53443e-14	Hoxb13_Tail	Tcf7l2
6.54698e-18	0.392936	0.698	0.364	1.06709e-13	Hoxb13_Tail	Pitpnc1
7.40097e-18	-0.3327	1	0.994	1.20628e-13	Hoxb13_Tail	Vdac2
8.13448e-18	0.336867	0.729	0.37	1.32584e-13	Hoxb13_Tail	Svep1
8.27144e-18	-0.31526	0.271	0.726	1.34816e-13	Hoxb13_Tail	Tgfb2
9.48074e-18	-0.31343	0.698	0.897	1.54527e-13	Hoxb13_Tail	Lrrc8c
1.15815e-17	0.363429	0.698	0.371	1.88767e-13	Hoxb13_Tail	Lgr4
1.49499e-17	-0.363782	0.854	0.938	2.43669e-13	Hoxb13_Tail	Fblim1
2.17557e-17	-0.439977	0.385	0.749	3.54595e-13	Hoxb13_Tail	Tnfrsf11b
2.34914e-17	0.467163	0.948	0.786	3.82886e-13	Hoxb13_Tail	Ebf1
2.60297e-17	0.677625	1	0.996	4.24257e-13	Hoxb13_Tail	S100a4
3.66852e-17	-0.524287	0.917	0.974	5.97932e-13	Hoxb13_Tail	Lmo4
1.78817e-16	-0.667742	0.948	0.989	2.91453e-12	Hoxb13_Tail	Sat1
3.22221e-16	0.387279	0.948	0.764	5.25188e-12	Hoxb13_Tail	Pcdh19
3.68208e-16	0.331352	0.896	0.653	6.00142e-12	Hoxb13_Tail	Twist1
4.39959e-16	-0.355934	0.99	0.988	7.1709e-12	Hoxb13_Tail	Wls
6.82381e-16	0.303491	0.885	0.674	1.11221e-11	Hoxb13_Tail	Rpa1
7.84226e-16	-0.340852	0.979	0.989	1.27821e-11	Hoxb13_Tail	Rbms1
7.90322e-16	0.264519	0.948	0.752	1.28815e-11	Hoxb13_Tail	Sept9
9.67486e-16	-0.383136	1	0.999	1.57691e-11	Hoxb13_Tail	Myl6
9.76243e-16	-0.810567	0.885	0.938	1.59118e-11	Hoxb13_Tail	Ckb
1.12597e-15	0.522019	0.927	0.744	1.83522e-11	Hoxb13_Tail	Lurap1l
1.18285e-15	0.474216	1	0.978	1.92793e-11	Hoxb13_Tail	Col5a2
1.5052e-15	-0.355981	1	0.999	2.45333e-11	Hoxb13_Tail	Calm1
1.69089e-15	-0.279212	0.51	0.793	2.75598e-11	Hoxb13_Tail	Pvrl2
1.78529e-15	-0.347932	1	1	2.90984e-11	Hoxb13_Tail	Myl12a
2.47995e-15	0.808727	0.625	0.301	4.04207e-11	Hoxb13_Tail	Dkk2
2.651e-15	-0.340121	0.958	0.982	4.32086e-11	Hoxb13_Tail	Phldb2
2.93816e-15	-0.772817	0.802	0.913	4.7889e-11	Hoxb13_Tail	Vamp5
2.96143e-15	0.325575	0.604	0.256	4.82684e-11	Hoxb13_Tail	Mylk
3.1312e-15	-0.438938	0.917	0.984	5.10355e-11	Hoxb13_Tail	App
3.58963e-15	0.44308	0.917	0.66	5.85074e-11	Hoxb13_Tail	Thbs2
4.95356e-15	0.381621	0.885	0.716	8.07381e-11	Hoxb13_Tail	Ccdc34
4.95576e-15	-0.524975	0.656	0.834	8.0774e-11	Hoxb13_Tail	Jam2
6.26992e-15	-0.396255	0.135	0.551	1.02193e-10	Hoxb13_Tail	Tmem176a
6.57539e-15	0.321821	1	1	1.07172e-10	Hoxb13_Tail	Arpc1b
7.23187e-15	0.293805	0.958	0.768	1.17872e-10	Hoxb13_Tail	Sdc1
8.0968e-15	-0.33791	0.625	0.863	1.3197e-10	Hoxb13_Tail	Grina
8.20644e-15	0.57734	1	0.918	1.33757e-10	Hoxb13_Tail	Pdpn
9.05871e-15	0.356202	0.99	0.922	1.47648e-10	Hoxb13_Tail	Lrp1
1.38767e-14	-0.402575	0.948	0.98	2.26176e-10	Hoxb13_Tail	Cyba
1.41428e-14	-0.420485	0.25	0.619	2.30514e-10	Hoxb13_Tail	Cxcl16
1.66457e-14	0.286825	1	0.999	2.71309e-10	Hoxb13_Tail	Sh3bgrl3
1.71325e-14	0.260704	0.948	0.846	2.79242e-10	Hoxb13_Tail	Dok1
2.26539e-14	-0.299367	0.635	0.84	3.69236e-10	Hoxb13_Tail	Pxdc1
2.33051e-14	0.47936	0.948	0.901	3.79849e-10	Hoxb13_Tail	Socs2
2.52112e-14	-0.618225	0.969	0.988	4.10917e-10	Hoxb13_Tail	Col4a1
2.7426e-14	-0.401535	0.677	0.896	4.47016e-10	Hoxb13_Tail	Nfib
4.47864e-14	0.286065	1	0.997	7.29974e-10	Hoxb13_Tail	Uqcc2
4.62951e-14	-0.610658	0.635	0.859	7.54564e-10	Hoxb13_Tail	Sdpr
5.03053e-14	-0.318319	0.865	0.951	8.19926e-10	Hoxb13_Tail	Adam9
5.83641e-14	0.351087	0.979	0.979	9.51276e-10	Hoxb13_Tail	Plec
6.61866e-14	-0.46432	0.948	0.98	1.07878e-09	Hoxb13_Tail	Taldo1
8.11237e-14	-0.286895	0.979	0.987	1.32224e-09	Hoxb13_Tail	Tm2d2
8.14673e-14	0.820763	0.792	0.566	1.32784e-09	Hoxb13_Tail	Ccl7
8.7775e-14	0.257979	0.865	0.549	1.43065e-09	Hoxb13_Tail	Hmga1
9.37233e-14	0.324266	0.75	0.481	1.5276e-09	Hoxb13_Tail	Snai2
9.57546e-14	0.356391	0.875	0.644	1.5607e-09	Hoxb13_Tail	Dpy19l1
9.83496e-14	-0.342763	0.656	0.879	1.603e-09	Hoxb13_Tail	Filip1l
1.26675e-13	0.548339	1	0.963	2.06467e-09	Hoxb13_Tail	Ifitm3
1.77369e-13	-0.31313	0.938	0.964	2.89093e-09	Hoxb13_Tail	Ghr
2.13287e-13	0.292351	0.927	0.772	3.47637e-09	Hoxb13_Tail	Arhgap31
2.26012e-13	0.310824	0.979	0.922	3.68378e-09	Hoxb13_Tail	Pold4
2.66676e-13	-0.648462	0.979	0.988	4.34656e-09	Hoxb13_Tail	Cryab
2.96335e-13	-0.317841	0.99	0.995	4.82996e-09	Hoxb13_Tail	Cnn3
3.64327e-13	-0.504871	0.99	0.995	5.93816e-09	Hoxb13_Tail	Gsto1
4.50012e-13	-0.273429	0.312	0.653	7.33474e-09	Hoxb13_Tail	Gpr39
4.52607e-13	-0.494346	0.521	0.791	7.37704e-09	Hoxb13_Tail	Jag1
4.5743e-13	0.406673	0.875	0.619	7.45565e-09	Hoxb13_Tail	Galnt18
4.70531e-13	0.26859	0.958	0.93	7.66919e-09	Hoxb13_Tail	Sptssa
4.80348e-13	0.428391	0.979	0.866	7.82919e-09	Hoxb13_Tail	Ecm1
5.32394e-13	-0.513274	0.24	0.573	8.67749e-09	Hoxb13_Tail	Gdf6
7.63951e-13	-0.266373	0.771	0.89	1.24516e-08	Hoxb13_Tail	Cttnbp2nl
8.06436e-13	-0.340267	1	0.999	1.31441e-08	Hoxb13_Tail	Anxa5
8.0935e-13	-0.305285	1	1	1.31916e-08	Hoxb13_Tail	Clic1
9.34789e-13	-0.321129	1	0.993	1.52361e-08	Hoxb13_Tail	Pdlim7
1.0406e-12	-0.482224	0.906	0.964	1.69608e-08	Hoxb13_Tail	Ier3
1.44556e-12	-0.476862	1	1	2.35612e-08	Hoxb13_Tail	B2m
2.32317e-12	-0.298318	0.333	0.664	3.78654e-08	Hoxb13_Tail	Htra1
2.3544e-12	-0.260806	0.99	0.995	3.83743e-08	Hoxb13_Tail	Cfl2
2.42338e-12	0.358966	0.594	0.295	3.94987e-08	Hoxb13_Tail	Klk8
2.65148e-12	0.25951	0.76	0.43	4.32164e-08	Hoxb13_Tail	Ccne1
2.98779e-12	-0.274871	0.958	0.976	4.86981e-08	Hoxb13_Tail	Dpysl3
3.26846e-12	0.255304	0.948	0.768	5.32727e-08	Hoxb13_Tail	Fgf2
3.52452e-12	0.470261	0.875	0.642	5.74462e-08	Hoxb13_Tail	Rrm2
3.56062e-12	-0.344681	0.615	0.839	5.80345e-08	Hoxb13_Tail	Rbpms
4.07698e-12	-0.254766	0.833	0.892	6.64507e-08	Hoxb13_Tail	Pvrl3
4.26435e-12	-0.26573	0.979	0.988	6.95046e-08	Hoxb13_Tail	Chic2
4.48349e-12	-0.315288	0.979	0.998	7.30765e-08	Hoxb13_Tail	Tmbim6
4.53629e-12	0.468634	0.917	0.793	7.3937e-08	Hoxb13_Tail	Lrrc32
4.61208e-12	-0.413216	0.104	0.461	7.51722e-08	Hoxb13_Tail	Tcf21
5.3671e-12	-0.273567	0.969	0.981	8.74784e-08	Hoxb13_Tail	Ppp1r2
5.47999e-12	-0.401146	0.865	0.954	8.93184e-08	Hoxb13_Tail	Crim1
6.03626e-12	-0.280435	0.792	0.92	9.8385e-08	Hoxb13_Tail	Celf2
6.45458e-12	-0.452199	0.833	0.934	1.05203e-07	Hoxb13_Tail	Loxl2
6.45771e-12	0.252852	0.938	0.83	1.05254e-07	Hoxb13_Tail	Vasn
6.49772e-12	0.530811	0.844	0.565	1.05906e-07	Hoxb13_Tail	Gas6
6.52055e-12	-0.43158	0.583	0.816	1.06279e-07	Hoxb13_Tail	Creg1
8.28584e-12	-0.28926	0.979	0.986	1.35051e-07	Hoxb13_Tail	Txnl1
1.22152e-11	-0.346817	0.958	0.984	1.99095e-07	Hoxb13_Tail	Cd151
1.28947e-11	-0.485942	0.865	0.925	2.1017e-07	Hoxb13_Tail	Ngf
1.37396e-11	0.26879	0.396	0.147	2.23941e-07	Hoxb13_Tail	Ptn
1.45228e-11	-0.434148	0.948	0.984	2.36707e-07	Hoxb13_Tail	Jund
1.49775e-11	0.266658	1	0.997	2.44118e-07	Hoxb13_Tail	Ptms
1.61058e-11	-0.255807	1	0.992	2.62509e-07	Hoxb13_Tail	Kif5b
1.62896e-11	-0.371917	1	1	2.65505e-07	Hoxb13_Tail	S100a11
1.78299e-11	-0.258648	0.302	0.619	2.90609e-07	Hoxb13_Tail	Jph2
1.80301e-11	-0.713578	0.573	0.766	2.93872e-07	Hoxb13_Tail	Postn
2.21946e-11	0.350238	1	0.973	3.6175e-07	Hoxb13_Tail	Emp3
2.7861e-11	-0.392621	1	0.999	4.54106e-07	Hoxb13_Tail	Dbi
2.87235e-11	0.283975	0.979	0.919	4.68164e-07	Hoxb13_Tail	Cd9
3.50695e-11	-0.407162	0.917	0.934	5.71599e-07	Hoxb13_Tail	Tubb2a
3.53463e-11	-0.260564	0.917	0.965	5.76109e-07	Hoxb13_Tail	Psmc2
3.97785e-11	0.39768	0.833	0.57	6.4835e-07	Hoxb13_Tail	Fam111a
4.22843e-11	-0.450194	0.542	0.787	6.89193e-07	Hoxb13_Tail	Fam101b
5.11836e-11	-0.25355	1	0.996	8.34241e-07	Hoxb13_Tail	Sub1
7.15921e-11	0.300541	0.771	0.553	1.16688e-06	Hoxb13_Tail	Alcam
7.68451e-11	-0.33495	0.385	0.681	1.2525e-06	Hoxb13_Tail	Npnt
9.06745e-11	-0.981026	0.594	0.761	1.4779e-06	Hoxb13_Tail	Plac8
9.50852e-11	0.281492	0.844	0.666	1.54979e-06	Hoxb13_Tail	Slco2a1
9.58371e-11	-0.253605	0.375	0.667	1.56205e-06	Hoxb13_Tail	Tmem37
9.70641e-11	-0.27677	0.917	0.96	1.58205e-06	Hoxb13_Tail	Ppp3ca
1.05797e-10	0.275151	0.917	0.789	1.72438e-06	Hoxb13_Tail	Epb41l3
1.08306e-10	0.257216	1	0.982	1.76528e-06	Hoxb13_Tail	Ptrf
1.65747e-10	-0.286674	0.865	0.952	2.70151e-06	Hoxb13_Tail	Ppa1
1.67413e-10	-0.253054	1	1	2.72866e-06	Hoxb13_Tail	Slc25a4
1.67576e-10	-0.268229	0.969	0.984	2.73133e-06	Hoxb13_Tail	Pea15a
1.72553e-10	-0.25565	0.51	0.778	2.81243e-06	Hoxb13_Tail	Meis2
2.06436e-10	-0.284816	0.979	0.981	3.36469e-06	Hoxb13_Tail	Cltb
2.13861e-10	0.449433	0.917	0.77	3.48572e-06	Hoxb13_Tail	Mfap5
2.31401e-10	0.391348	0.583	0.35	3.77161e-06	Hoxb13_Tail	Pde10a
2.63098e-10	-0.379635	1	0.971	4.28823e-06	Hoxb13_Tail	Fscn1
3.23975e-10	-0.259855	0.802	0.938	5.28048e-06	Hoxb13_Tail	Creb3
3.65473e-10	-0.650909	1	0.988	5.95684e-06	Hoxb13_Tail	Tagln
3.70137e-10	0.378096	0.896	0.706	6.03287e-06	Hoxb13_Tail	Mustn1
4.04191e-10	-0.364056	0.948	0.947	6.58791e-06	Hoxb13_Tail	Fam198b
4.28583e-10	0.263161	0.969	0.937	6.98547e-06	Hoxb13_Tail	Slc48a1
4.42754e-10	0.309009	1	0.971	7.21644e-06	Hoxb13_Tail	Dap
4.60973e-10	0.468117	1	0.983	7.5134e-06	Hoxb13_Tail	Lox
5.05691e-10	0.325726	1	0.998	8.24226e-06	Hoxb13_Tail	Vim
5.41953e-10	-0.299454	1	0.998	8.8333e-06	Hoxb13_Tail	Gapdh
5.63747e-10	-0.324156	0.635	0.819	9.18851e-06	Hoxb13_Tail	Scarb2
6.25355e-10	-0.418794	0.99	0.976	1.01927e-05	Hoxb13_Tail	Phlda1
6.83528e-10	0.263332	1	0.993	1.11408e-05	Hoxb13_Tail	Sepw1
7.10905e-10	-0.286668	0.906	0.929	1.1587e-05	Hoxb13_Tail	Kdelr3
7.47572e-10	-0.288969	1	1	1.21847e-05	Hoxb13_Tail	Actn1
7.777e-10	-0.844333	1	0.998	1.26757e-05	Hoxb13_Tail	Ctsl
9.25835e-10	-0.40852	0.677	0.84	1.50902e-05	Hoxb13_Tail	Cyp1b1
9.62554e-10	0.31507	1	0.974	1.56887e-05	Hoxb13_Tail	Mbnl1
1.2055e-09	-0.336532	0.854	0.877	1.96485e-05	Hoxb13_Tail	Ctsh
1.39758e-09	0.480134	0.271	0.085	2.27792e-05	Hoxb13_Tail	Ppbp
1.46215e-09	-0.409956	0.896	0.928	2.38316e-05	Hoxb13_Tail	Wisp1
1.57979e-09	-0.287832	0.469	0.678	2.5749e-05	Hoxb13_Tail	Egfr
1.62557e-09	-0.325319	0.156	0.471	2.64952e-05	Hoxb13_Tail	Serpinb9b
1.89322e-09	-0.604089	0.74	0.843	3.08576e-05	Hoxb13_Tail	Tinagl1
2.19167e-09	-0.260579	0.979	0.996	3.5722e-05	Hoxb13_Tail	Psma2
2.21846e-09	-0.252138	1	0.999	3.61587e-05	Hoxb13_Tail	Psmd8
2.22965e-09	-0.262463	0.99	0.988	3.63411e-05	Hoxb13_Tail	Marcks
2.44947e-09	-0.451101	0.99	1	3.9924e-05	Hoxb13_Tail	Fn1
2.53999e-09	0.429302	0.656	0.382	4.13994e-05	Hoxb13_Tail	Sod3
2.80921e-09	-0.539244	0.99	0.99	4.57874e-05	Hoxb13_Tail	Csrp1
3.01894e-09	-0.575769	0.542	0.719	4.92056e-05	Hoxb13_Tail	Tubb3
3.17233e-09	0.254303	0.938	0.899	5.17058e-05	Hoxb13_Tail	Prkar2a
3.64577e-09	0.290304	0.979	0.936	5.94224e-05	Hoxb13_Tail	Spp1
3.83749e-09	-0.43477	0.375	0.66	6.25473e-05	Hoxb13_Tail	Nrep
4.2423e-09	-0.673812	1	0.999	6.91452e-05	Hoxb13_Tail	Acta2
6.24794e-09	-0.56552	0.885	0.885	0.000101835	Hoxb13_Tail	Pdlim2
6.31815e-09	-0.464134	0.219	0.499	0.00010298	Hoxb13_Tail	Edn1
6.65294e-09	-0.284603	0.979	0.99	0.000108436	Hoxb13_Tail	Vimp
6.77847e-09	-0.428854	1	1	0.000110482	Hoxb13_Tail	Serpine1
7.02238e-09	-0.446582	1	1	0.000114458	Hoxb13_Tail	Cd63
8.34999e-09	0.352273	1	0.978	0.000136097	Hoxb13_Tail	Crlf1
8.95369e-09	-0.661723	0.312	0.55	0.000145936	Hoxb13_Tail	Tbx20
1.3461e-08	0.303119	0.927	0.845	0.000219401	Hoxb13_Tail	Dek
1.64795e-08	0.275133	0.896	0.656	0.0002686	Hoxb13_Tail	Nqo1
1.78437e-08	-0.329002	0.115	0.384	0.000290835	Hoxb13_Tail	Hsd11b1
1.87376e-08	-0.263528	0.969	0.979	0.000305404	Hoxb13_Tail	Fermt2
2.16933e-08	-0.432211	0.594	0.753	0.000353579	Hoxb13_Tail	Eng
2.53e-08	-0.366528	0.646	0.768	0.000412365	Hoxb13_Tail	Ptprb
3.34794e-08	0.318035	1	0.957	0.00054568	Hoxb13_Tail	Emp1
3.59302e-08	-0.28919	0.948	0.917	0.000585626	Hoxb13_Tail	2310022B05Rik
4.4602e-08	-0.312738	0.979	0.99	0.000726968	Hoxb13_Tail	Atp6v0b
5.2855e-08	-0.304482	0.927	0.952	0.000861484	Hoxb13_Tail	Plod2
5.5925e-08	-0.361387	1	0.997	0.000911521	Hoxb13_Tail	Ubb
5.7549e-08	-0.440427	1	0.993	0.00093799	Hoxb13_Tail	Ctgf
6.54386e-08	-0.544412	0.969	0.968	0.00106658	Hoxb13_Tail	Itgb5
6.63741e-08	-0.450732	0.292	0.556	0.00108183	Hoxb13_Tail	Glipr1
6.79048e-08	0.316478	0.99	0.907	0.00110678	Hoxb13_Tail	Dut
7.41052e-08	-0.254008	1	1	0.00120784	Hoxb13_Tail	Atp5b
7.92244e-08	-0.265702	0.938	0.963	0.00129128	Hoxb13_Tail	Rnh1
8.73483e-08	-0.252016	0.99	0.996	0.00142369	Hoxb13_Tail	Atp5f1
9.66965e-08	-0.958301	0.625	0.739	0.00157606	Hoxb13_Tail	Tnnt2
9.90543e-08	-0.262222	0.76	0.85	0.00161449	Hoxb13_Tail	Jup
1.09601e-07	-0.304296	1	0.994	0.00178638	Hoxb13_Tail	Tceal8
1.16652e-07	-0.295514	0.99	0.997	0.0019013	Hoxb13_Tail	Tmem59
1.55818e-07	0.283441	0.979	0.929	0.00253968	Hoxb13_Tail	Scd2
2.03019e-07	-0.500283	0.25	0.5	0.003309	Hoxb13_Tail	Dcn
2.14008e-07	-0.29684	0.99	0.996	0.00348812	Hoxb13_Tail	Tspo
2.15602e-07	0.274934	0.99	0.964	0.0035141	Hoxb13_Tail	Prkcdbp
2.28851e-07	-0.256651	0.854	0.926	0.00373005	Hoxb13_Tail	Mllt11
2.32525e-07	-0.333323	0.99	0.982	0.00378993	Hoxb13_Tail	Col4a2
2.46904e-07	0.255094	1	0.995	0.00402429	Hoxb13_Tail	Bgn
2.58462e-07	-0.434254	0.99	0.996	0.00421268	Hoxb13_Tail	Cd81
2.97382e-07	-0.314474	0.969	0.985	0.00484703	Hoxb13_Tail	Litaf
3.04771e-07	-0.320623	1	0.998	0.00496746	Hoxb13_Tail	Prdx1
3.29838e-07	-0.306459	0.948	0.955	0.00537603	Hoxb13_Tail	Ddah1
3.42741e-07	-0.393016	0.917	0.915	0.00558633	Hoxb13_Tail	Prdx4
3.46183e-07	-0.313087	0.969	0.96	0.00564243	Hoxb13_Tail	Bdnf
4.07076e-07	-0.690797	0.469	0.605	0.00663493	Hoxb13_Tail	Igf1
4.84304e-07	0.302398	1	0.905	0.00789367	Hoxb13_Tail	Gng11
4.86844e-07	-0.288367	0.219	0.479	0.00793507	Hoxb13_Tail	Aif1l
5.18615e-07	0.291644	1	0.974	0.0084529	Hoxb13_Tail	S100a13
6.22846e-07	-0.259919	0.094	0.33	0.0101518	Hoxb13_Tail	Fxyd6
6.95129e-07	-0.254558	1	0.994	0.0113299	Hoxb13_Tail	Anxa3
7.46061e-07	0.296842	0.323	0.151	0.01216	Hoxb13_Tail	Slc16a11
7.48719e-07	-0.293326	0.219	0.452	0.0122034	Hoxb13_Tail	Frzb
7.83536e-07	0.297332	0.917	0.783	0.0127709	Hoxb13_Tail	Arhgdib
8.34229e-07	-0.35081	0.24	0.453	0.0135971	Hoxb13_Tail	Sorbs2
8.49817e-07	-0.41162	0.344	0.54	0.0138512	Hoxb13_Tail	Pmaip1
8.49993e-07	-0.798985	0.917	0.931	0.013854	Hoxb13_Tail	Gpx3
1.51275e-06	-0.380939	0.365	0.564	0.0246563	Hoxb13_Tail	Plscr2
1.5478e-06	-0.511238	0.781	0.856	0.0252277	Hoxb13_Tail	Col8a1
1.82964e-06	-0.35499	0.958	0.975	0.0298214	Hoxb13_Tail	Gadd45g
2.01856e-06	-0.297904	1	0.999	0.0329005	Hoxb13_Tail	S100a10
2.1327e-06	-0.34069	0.281	0.483	0.0347609	Hoxb13_Tail	Aldh1a1
2.40102e-06	-0.373114	0.792	0.849	0.0391342	Hoxb13_Tail	Id2
2.50334e-06	-0.284691	0.635	0.75	0.040802	Hoxb13_Tail	Col11a1
2.54836e-06	-0.649539	0.698	0.819	0.0415357	Hoxb13_Tail	Cxcl12
3.85701e-06	-0.252881	0.135	0.353	0.0628654	Hoxb13_Tail	Ecscr
4.62138e-06	-0.632097	0.75	0.828	0.0753239	Hoxb13_Tail	Fst
5.25874e-06	0.270594	0.333	0.173	0.0857122	Hoxb13_Tail	Serpinb2
5.45393e-06	0.262904	0.771	0.626	0.0888937	Hoxb13_Tail	Adm
6.00952e-06	-0.256083	1	0.996	0.0979492	Hoxb13_Tail	Map1lc3b
6.96464e-06	-0.252621	0.312	0.518	0.113517	Hoxb13_Tail	F11r
7.1555e-06	-0.299565	0.719	0.786	0.116627	Hoxb13_Tail	Pcolce2
7.79886e-06	0.337843	0.594	0.401	0.127114	Hoxb13_Tail	Top2a
7.87381e-06	-0.507023	0.948	0.972	0.128335	Hoxb13_Tail	Timp3
7.92987e-06	-0.265238	0.979	0.977	0.129249	Hoxb13_Tail	Fhl2
9.78998e-06	-0.303853	0.969	0.972	0.159567	Hoxb13_Tail	Marcksl1
1.00579e-05	-0.316234	0.667	0.767	0.163933	Hoxb13_Tail	Zfp36l1
1.00932e-05	0.275021	0.344	0.179	0.164509	Hoxb13_Tail	Mcpt8
1.03033e-05	-0.260029	0.938	0.956	0.167934	Hoxb13_Tail	Unc5b
1.16073e-05	-0.406471	0.948	0.974	0.189188	Hoxb13_Tail	Myl9
1.20195e-05	-0.643456	0.885	0.883	0.195905	Hoxb13_Tail	Cd24a
1.21865e-05	-0.32583	0.646	0.755	0.198628	Hoxb13_Tail	Atp1b1
1.26487e-05	-0.334007	0.094	0.304	0.206161	Hoxb13_Tail	Sprr1a
1.32598e-05	-0.436572	0.99	0.995	0.216122	Hoxb13_Tail	Tm4sf1
1.33343e-05	-0.304622	0.99	0.963	0.217336	Hoxb13_Tail	Nid1
1.37701e-05	-0.40079	0.656	0.774	0.224439	Hoxb13_Tail	Gstm1
2.01617e-05	0.313636	0.781	0.617	0.328616	Hoxb13_Tail	Thy1
3.59466e-05	-0.712216	0.146	0.335	0.585894	Hoxb13_Tail	Spint2
3.84447e-05	-0.362465	0.49	0.625	0.62661	Hoxb13_Tail	Sox9
4.1386e-05	-0.261924	0.208	0.399	0.67455	Hoxb13_Tail	Peg3
4.28336e-05	0.27523	0.979	0.937	0.698144	Hoxb13_Tail	Fbn1
5.75796e-05	0.252407	0.885	0.818	0.93849	Hoxb13_Tail	Phgdh
7.29102e-05	-0.5612	0.99	0.99	1	Hoxb13_Tail	Itm2b
0.000112137	-0.47073	0.688	0.745	1	Hoxb13_Tail	Mgst1
0.000115893	-0.252136	0.99	0.991	1	Hoxb13_Tail	Fbln2
0.000120377	-0.375895	0.885	0.899	1	Hoxb13_Tail	Cthrc1
0.000121077	-0.262203	0.083	0.253	1	Hoxb13_Tail	Pdlim3
0.000124685	-0.367996	0.667	0.773	1	Hoxb13_Tail	Adamts5
0.000143372	0.258755	0.885	0.845	1	Hoxb13_Tail	Mt2
0.000204435	-0.337137	0.177	0.348	1	Hoxb13_Tail	Ccl17
0.000272132	0.25013	0.969	0.959	1	Hoxb13_Tail	Id1
0.000385227	-0.341203	0.844	0.912	1	Hoxb13_Tail	2200002D01Rik
0.00100627	-0.648148	0.906	0.911	1	Hoxb13_Tail	F3
0.00133511	-0.609198	0.292	0.442	1	Hoxb13_Tail	Gdf15
0.00153366	0.379332	0.438	0.329	1	Hoxb13_Tail	A330069E16Rik
0.00195686	-0.418319	0.448	0.594	1	Hoxb13_Tail	Ldhb
0.00273517	-0.371842	0.948	0.973	1	Hoxb13_Tail	Sox4
0.00310259	-0.286035	0.594	0.449	1	Hoxb13_Tail	Il11
0.00316615	-0.391125	0.469	0.559	1	Hoxb13_Tail	Ptx3
0.00324417	0.312333	0.562	0.464	1	Hoxb13_Tail	2810417H13Rik
0.00335929	-0.32025	0.323	0.451	1	Hoxb13_Tail	Krt19
0.00347997	-0.286184	0.917	0.924	1	Hoxb13_Tail	Nupr1
0.0040165	-0.270072	0.188	0.319	1	Hoxb13_Tail	Perp
0.00482619	0.333874	0.625	0.555	1	Hoxb13_Tail	Birc5
0.00507346	-1.72308	0.667	0.779	1	Hoxb13_Tail	Clu
0.0102517	-1.02249	0.26	0.379	1	Hoxb13_Tail	Krt18
0.0107307	-0.797882	0.948	0.94	1	Hoxb13_Tail	Mgp
0.0160038	-0.381271	1	0.994	1	Hoxb13_Tail	Ctsd
0.0266878	-0.531711	0.271	0.368	1	Hoxb13_Tail	Sfn
0.0317008	-0.374787	0.99	0.949	1	Hoxb13_Tail	Card19
0.0422154	-0.270343	0.865	0.883	1	Hoxb13_Tail	Hist1h1c
0.061322	-0.273742	0.938	0.925	1	Hoxb13_Tail	Fhl1
0.0703315	-0.980419	0.177	0.251	1	Hoxb13_Tail	Krt8
0.0812195	-0.676901	0.479	0.518	1	Hoxb13_Tail	Igfbp2
0.0822758	-0.395331	0.781	0.779	1	Hoxb13_Tail	Cnn1
0.0965641	-0.599511	0.26	0.321	1	Hoxb13_Tail	Esm1
0.136608	-0.386877	0.75	0.699	1	Hoxb13_Tail	Gxylt2
0.141636	-0.290932	1	0.998	1	Hoxb13_Tail	Cst3
0.206993	-0.413148	0.271	0.328	1	Hoxb13_Tail	Crct1
0.420532	-0.275816	0.948	0.94	1	Hoxb13_Tail	Plin2

## Sheet: FindMarkers_Kidney2_1
p_val	avg_logFC	pct.1	pct.2	p_val_adj	gene
1.47626e-53	-3.24711	0.8	1	2.40615e-49	Clu
9.22089e-44	-3.2083	0.2	1	1.50291e-39	Krt8
1.26154e-51	-3.03769	0.467	1	2.05619e-47	Krt18
2.75739e-42	-2.37352	0.078	0.984	4.49426e-38	Krt7
8.7104e-48	-2.32875	0.2	1	1.41971e-43	Cldn4
2.40929e-45	-2.07402	0.056	1	3.9269e-41	Epcam
4.58994e-36	-2.01873	0.578	1	7.48114e-32	Sfn
1.38381e-32	-2.0162	0.111	0.935	2.25548e-28	Wfdc2
1.10245e-43	-1.9585	0.022	0.984	1.79689e-39	Cldn7
1.132e-28	-1.93752	0.656	1	1.84505e-24	Ly6a
1.86962e-32	-1.84128	0.2	0.952	3.0473e-28	Krt19
6.19195e-46	-1.78679	0.822	1	1.00923e-41	Spint2
4.18615e-36	-1.53394	0.011	0.935	6.82301e-32	Cldn3
2.12136e-39	-1.43921	0.044	0.984	3.4576e-35	Mal
1.85536e-28	-1.43286	0.456	0.968	3.02405e-24	Fermt1
4.00481e-27	-1.14406	0.933	1	6.52744e-23	Cd9
3.42901e-16	-1.09033	0.878	1	5.58894e-12	Ldhb
5.83808e-28	-1.07997	0.389	0.984	9.51549e-24	Cxcl16
1.44897e-09	-1.06267	0.944	0.984	2.36168e-05	F3
7.76328e-22	-1.03911	0.133	0.839	1.26534e-17	Prss22
2.61231e-36	-1.01571	0.011	0.935	4.25781e-32	Cdh1
1.12429e-34	-0.98812	0.122	0.984	1.83248e-30	Wnt7a
1.07845e-20	-0.969149	0.433	0.935	1.75776e-16	Tacstd2
2.61885e-30	-0.924524	0.556	1	4.26846e-26	Lsr
8.8916e-27	-0.918267	0.289	0.952	1.44924e-22	Spint1
4.69532e-23	-0.917916	0.556	1	7.6529e-19	Ddit4
1.2997e-27	-0.876324	0.133	0.935	2.11839e-23	Kcnk1
5.4884e-35	-0.875002	0.044	0.952	8.94555e-31	Itgb4
1.45571e-24	-0.86865	0.678	1	2.37265e-20	Adgrg1
1.77333e-29	-0.852286	0.033	0.839	2.89036e-25	Rab25
7.73642e-19	-0.848373	0.6	1	1.26096e-14	Perp
1.65847e-10	-0.831656	0.611	0.919	2.70314e-06	Ccnd1
1.46738e-27	-0.824388	0.167	0.919	2.39168e-23	Slc4a11
4.17655e-32	-0.815731	0.122	0.968	6.80736e-28	Mapk13
2.17365e-19	-0.805782	0.944	1	3.54284e-15	Myl12b
1.86654e-14	-0.783089	0.944	0.968	3.04228e-10	Hmgb3
1.60761e-31	-0.754727	0.933	0.984	2.62024e-27	F11r
1.67554e-07	-0.749815	0.733	0.919	0.00273096	Gadd45a
1.52158e-13	-0.736664	1	1	2.48002e-09	Itm2b
6.48318e-11	-0.719717	0.844	1	1.05669e-06	Pmaip1
7.91639e-28	-0.714742	0.1	0.919	1.29029e-23	St14
4.0301e-29	-0.713117	0.3	0.984	6.56866e-25	Crb3
1.35635e-15	-0.710705	0.533	0.919	2.21071e-11	Lmo1
7.77137e-13	-0.700508	0.644	0.984	1.26666e-08	Cdkn2b
5.00622e-19	-0.697761	0.8	1	8.15964e-15	Tgif1
9.58998e-12	-0.694432	0.011	0.435	1.56307e-07	Cldn6
1.09282e-13	-0.671439	1	1	1.78118e-09	Ctsd
2.15262e-15	-0.669427	0.844	1	3.50856e-11	H2-D1
8.94066e-15	-0.66528	0.656	0.935	1.45724e-10	Gadd45b
1.2524e-11	-0.66451	1	1	2.04128e-07	Cdkn1a
4.12216e-07	-0.657799	0.5	0.839	0.00671871	Bex1
1.46156e-16	-0.65355	0.567	0.968	2.38219e-12	Ctsh
3.14765e-09	-0.64156	0.156	0.516	5.13036e-05	Bex4
7.68446e-21	-0.626023	0.222	0.903	1.25249e-16	Ano1
2.19241e-15	-0.619353	0.233	0.823	3.57341e-11	Irx2
2.91191e-21	-0.619167	0.778	1	4.74612e-17	Serinc2
4.38123e-07	-0.617224	0.111	0.468	0.00714096	Ppbp
2.07282e-14	-0.614093	0.989	1	3.3785e-10	Anxa5
2.29069e-18	-0.609425	0.856	1	3.7336e-14	Tmem238
1.73933e-34	-0.608226	0.022	0.935	2.83494e-30	Gipc2
4.4725e-15	-0.600377	0.711	0.984	7.28972e-11	Dnase2a
4.78389e-13	-0.585824	1	1	7.79727e-09	Klf6
4.96848e-12	-0.578698	0.978	1	8.09813e-08	Junb
4.9676e-19	-0.568473	0.2	0.855	8.0967e-15	Lamc2
1.23245e-10	-0.560105	0.911	1	2.00877e-06	Btg2
4.95051e-13	-0.559864	1	1	8.06884e-09	Denr
6.71575e-13	-0.554633	1	1	1.0946e-08	Ubc
4.58593e-18	-0.552975	0.167	0.79	7.47461e-14	Tmc4
6.89752e-24	-0.552751	0.022	0.758	1.12423e-19	Lamb3
4.95885e-16	-0.534341	0.689	0.984	8.08242e-12	Hpcal1
6.44463e-16	-0.531137	0.278	0.839	1.05041e-11	Wnt7b
3.50463e-19	-0.529467	0.189	0.839	5.71219e-15	Ptprf
1.84252e-15	-0.529104	1	1	3.00312e-11	Capns1
2.62255e-11	-0.528775	0.967	1	4.2745e-07	Gsto1
4.41351e-13	-0.527541	1	1	7.19358e-09	Eif1
3.7883e-05	-0.524508	0.889	0.903	0.617454	Gdf15
4.33565e-10	-0.52348	0.989	1	7.06667e-06	Sri
7.91899e-07	-0.520416	0.922	0.952	0.0129072	Zfp36l1
2.89916e-09	-0.512009	0.911	0.984	4.72534e-05	1110008P14Rik
3.99826e-19	-0.511657	0.233	0.903	6.51677e-15	C77080
2.47078e-15	-0.510959	0.922	1	4.02712e-11	Med10
1.36562e-11	-0.508001	0.833	0.968	2.22582e-07	Ralb
3.63336e-13	-0.505658	0.289	0.806	5.92202e-09	Plau
7.18523e-05	-0.504988	0.933	0.871	1	Anxa1
9.26931e-06	-0.504014	0.989	1	0.151081	Sox4
5.36813e-12	-0.496822	0.567	0.871	8.74952e-08	Bcam
2.18142e-11	-0.495679	0.978	1	3.5555e-07	Ptbp3
2.19714e-08	-0.491983	0.856	1	0.000358113	Atp1b1
1.65217e-11	-0.490529	0.967	1	2.69287e-07	Cct5
4.86807e-10	-0.488135	0.811	0.984	7.93447e-06	H2-K1
4.67853e-08	-0.486974	1	1	0.000762554	Ubb
8.4241e-07	-0.485331	0.933	0.984	0.0137304	Plk2
7.23684e-09	-0.482365	0.867	0.935	0.000117953	Tuba4a
8.29922e-20	-0.478745	0.1	0.774	1.35269e-15	Smagp
1.02505e-13	-0.476429	1	1	1.67073e-09	Eif3h
7.514e-18	-0.473555	0.311	0.871	1.22471e-13	Cyb561
1.41186e-20	-0.473208	0	0.613	2.30119e-16	Il18r1
2.12406e-09	-0.471003	0.6	0.919	3.462e-05	Gjb4
0.013145	-0.470355	0.989	1	1	Spp1
1.47274e-07	-0.47014	0.978	1	0.00240042	Ier3
1.61262e-07	-0.46862	0.567	0.855	0.0026284	Ass1
2.49558e-11	-0.467896	0.467	0.839	4.06755e-07	Sema6a
5.10337e-13	-0.46615	0.989	1	8.31798e-09	Arf5
6.08397e-05	-0.460968	0.033	0.274	0.991626	Lcn2
8.65688e-17	-0.456989	0.567	0.952	1.41098e-12	Grpel2
6.27162e-10	-0.452699	0.867	0.984	1.02221e-05	Acadl
4.77026e-09	-0.451631	1	1	7.77505e-05	Cd81
6.73182e-11	-0.45151	0.978	1	1.09722e-06	2700060E02Rik
3.31152e-12	-0.44923	0.856	0.984	5.39745e-08	Amotl1
0.0462905	-0.447492	0.989	0.952	1	Tpm2
5.95269e-12	-0.443318	0.922	1	9.70228e-08	Sin3b
1.58171e-09	-0.442312	1	1	2.57804e-05	Basp1
1.09865e-07	-0.439777	1	1	0.00179069	App
1.06576e-10	-0.439706	1	1	1.73708e-06	Eef2
5.96247e-16	-0.439697	0.333	0.855	9.71822e-12	Eps8l2
6.10771e-25	-0.436476	0	0.71	9.95496e-21	Mal2
1.87815e-06	-0.43361	0.656	0.871	0.030612	Sesn3
1.12491e-07	-0.4308	0.689	0.887	0.00183349	Ebpl
1.2758e-11	-0.43007	0.533	0.887	2.07942e-07	Foxn3
1.02217e-14	-0.430048	0.244	0.806	1.66603e-10	Dsp
3.01725e-09	-0.42813	0.867	0.935	4.91782e-05	Plpp2
5.9423e-18	-0.426837	0.022	0.629	9.68536e-14	Pvrl4
8.33819e-06	-0.426188	0.989	0.984	0.135904	Crip2
1.08671e-05	-0.422331	1	1	0.177123	Tspo
5.16748e-08	-0.421827	0.933	0.984	0.000842248	Fam3c
2.47891e-08	-0.420588	0.667	0.952	0.000404037	Cdh16
7.18999e-11	-0.41965	0.811	0.984	1.1719e-06	Pafah1b3
5.34256e-10	-0.419215	0.933	1	8.70783e-06	Fkbp4
1.66175e-06	-0.417938	1	1	0.0270849	Jund
7.80407e-11	-0.417245	0.7	0.984	1.27198e-06	Sdc1
7.37181e-10	-0.416655	1	0.984	1.20153e-05	Psmd8
7.47056e-09	-0.416169	0.978	1	0.000121763	Hprt
2.73708e-17	-0.415955	0.022	0.613	4.46117e-13	Itgb6
2.90614e-23	-0.41415	0.011	0.726	4.73671e-19	Krtcap3
8.07356e-10	-0.412063	0.778	0.919	1.31591e-05	Psme1
0.0421726	-0.411735	0.322	0.419	1	Glipr1
9.9976e-17	-0.410978	0	0.516	1.62951e-12	Efhd1
4.73061e-19	-0.410459	0.067	0.758	7.71043e-15	Moxd1
1.98926e-17	-0.409294	0.122	0.774	3.24229e-13	Arhgef16
3.77821e-11	-0.409135	0.989	1	6.15811e-07	Arpc3
0.00804644	-0.408074	0.767	0.871	1	Akr1b8
6.01964e-05	-0.406213	0.678	0.855	0.981142	Nudt18
1.03282e-09	-0.403235	0.889	0.984	1.6834e-05	Uqcrc2
6.86709e-11	-0.402303	0.856	1	1.11927e-06	Psmd12
2.08192e-13	-0.401219	0.056	0.581	3.39332e-09	Paqr5
1.5027e-13	-0.399178	0.033	0.548	2.44925e-09	A630095E13Rik
8.38595e-09	-0.397248	0.933	1	0.000136683	Col18a1
2.77882e-21	-0.393706	0.022	0.71	4.52919e-17	Cdcp1
4.9877e-07	-0.393613	0.856	0.952	0.00812946	Phf3
1.21364e-08	-0.388867	0.544	0.871	0.000197812	Adam12
2.37822e-08	-0.388844	0.511	0.855	0.000387627	Ptp4a3
0.00018585	-0.388593	0.667	0.871	1	Fdps
1.14407e-09	-0.387166	1	1	1.86471e-05	Prdx2
2.35013e-19	-0.387094	0.178	0.871	3.83048e-15	Shtn1
1.41648e-09	-0.38691	0.1	0.548	2.30872e-05	Gata3
6.48209e-13	-0.384664	0.033	0.532	1.05652e-08	Foxq1
4.89873e-13	-0.384402	0.356	0.774	7.98444e-09	Klc3
4.21691e-10	-0.38421	0.422	0.839	6.87315e-06	Rnf128
3.29435e-10	-0.384046	0.978	1	5.36945e-06	Tsg101
7.38261e-09	-0.383351	0.489	0.839	0.000120329	Bst2
4.28698e-05	-0.381355	0.911	0.984	0.698734	Grn
6.73714e-10	-0.381205	0.922	1	1.09809e-05	Eif3l
4.9709e-12	-0.379377	0.8	0.952	8.10208e-08	Dhrs1
1.25563e-07	-0.37909	0.956	1	0.00204656	Jup
1.43016e-08	-0.378971	0.644	0.903	0.000233101	Gnpda2
0.000405462	-0.377749	0.844	0.952	1	Cdkn2a
3.36733e-21	-0.375639	0.044	0.758	5.48842e-17	Nipal2
1.37731e-08	-0.375257	0.8	0.919	0.000224487	0610011F06Rik
3.72365e-08	-0.374334	0.911	0.984	0.000606918	Ei24
1.26544e-11	-0.373253	1	1	2.06254e-07	Slc25a3
7.2321e-09	-0.371687	0.922	0.984	0.000117876	Nt5c
6.44777e-10	-0.368785	0.856	0.984	1.05092e-05	Ormdl2
0.000640188	-0.368267	0.856	0.935	1	Sorbs2
9.40063e-05	-0.367857	0.922	0.984	1	Pdlim1
2.60698e-07	-0.367707	1	1	0.00424911	Hspa8
2.6997e-10	-0.367685	0.978	1	4.40025e-06	Pdcd6
1.55076e-07	-0.36494	0.989	1	0.00252759	Cct4
1.72392e-05	-0.362066	0.933	0.984	0.280981	Capg
0.101242	-0.361662	0.967	0.984	1	Zfos1
2.10299e-06	-0.361081	0.8	0.935	0.0342766	Osbpl3
1.99068e-07	-0.360992	0.978	1	0.00324461	Hsp90aa1
7.43146e-10	-0.360751	0.556	0.887	1.21125e-05	Trip10
1.69912e-11	-0.360602	1	0.984	2.7694e-07	Tmbim6
1.0557e-08	-0.360496	1	1	0.000172068	Eef1a1
2.59811e-22	-0.360419	0.011	0.71	4.23466e-18	Lama3
1.5321e-08	-0.359666	0.922	0.968	0.000249716	Cd2ap
1.27422e-11	-0.359191	0.4	0.871	2.07686e-07	Galnt3
1.20081e-18	-0.358505	0.033	0.677	1.95721e-14	Bspry
0.000119487	-0.358037	0.722	0.806	1	Pdgfb
1.7619e-10	-0.35732	0.3	0.774	2.87172e-06	Trim7
1.61979e-09	-0.357186	0.722	0.984	2.6401e-05	Akr7a5
1.31969e-09	-0.35666	0.956	1	2.15097e-05	Txndc9
2.26734e-06	-0.356146	0.833	0.984	0.0369553	Agrn
5.16594e-05	-0.355287	0.867	0.968	0.841996	Ier2
4.12503e-08	-0.355022	1	1	0.000672339	Pdlim7
3.40523e-18	-0.354473	0.044	0.694	5.55018e-14	Cgn
5.63233e-05	-0.354133	0.778	0.806	0.918014	Snhg12
0.000224263	-0.353594	0.989	1	1	Plin2
3.40689e-08	-0.353231	0.067	0.452	0.000555289	Msln
0.000117262	-0.35314	0.467	0.629	1	Htra1
3.60071e-24	-0.352785	0	0.694	5.86879e-20	Prss8
4.47691e-10	-0.352761	0.489	0.839	7.29691e-06	Fuca2
1.61312e-07	-0.352208	0.989	1	0.00262922	Rab11a
1.627e-07	-0.351822	0.144	0.565	0.00265185	Prom1
1.27575e-08	-0.351386	0.967	0.968	0.000207935	Eif3m
7.58012e-09	-0.350525	1	1	0.000123548	Clta
4.41401e-08	-0.350052	0.956	1	0.000719439	Txnl1
9.89744e-26	-0.350026	0	0.726	1.61318e-21	Ap1m2
2.03232e-05	-0.349778	0.922	0.984	0.331248	Tuba1c
8.70705e-09	-0.349593	0.989	1	0.000141916	Atp5f1
7.2822e-09	-0.349382	1	1	0.000118693	Atp5b
5.93248e-08	-0.349097	1	1	0.000966935	Tmem59
4.8171e-08	-0.348987	0.922	1	0.000785139	Atxn10
5.16954e-19	-0.34857	0.022	0.661	8.42584e-15	Pkp3
1.09529e-05	-0.347097	0.956	1	0.178522	Pdcl3
2.56829e-08	-0.346208	0.933	1	0.000418606	Uqcrfs1
3.87924e-05	-0.346113	0.444	0.758	0.632278	Scin
3.10099e-08	-0.345053	0.867	0.984	0.000505431	Mrpl21
6.65012e-12	-0.344783	0.467	0.887	1.0839e-07	Stard10
1.40901e-08	-0.344522	0.878	0.984	0.000229654	Uchl3
1.49175e-09	-0.34423	0.633	0.903	2.4314e-05	Hmox2
2.97536e-10	-0.343475	0.922	0.952	4.84953e-06	Psme2
7.55746e-08	-0.343085	0.367	0.758	0.00123179	Fam129a
8.62402e-05	-0.342905	0.667	0.855	1	Dcxr
0.0102516	-0.341933	1	1	1	Sqstm1
3.14543e-07	-0.340387	0.811	0.984	0.00512674	Ccbe1
3.05848e-07	-0.336866	0.967	0.984	0.00498501	Chmp2a
8.95872e-15	-0.336566	0.311	0.855	1.46018e-10	Nt5c2
0.0226225	-0.336388	0.878	0.935	1	Rdh10
3.60071e-24	-0.335988	0	0.694	5.86879e-20	Cblc
3.92159e-07	-0.334893	0.967	1	0.00639179	Sars
7.72814e-07	-0.334585	0.844	0.968	0.0125961	Ezr
1.40015e-08	-0.334539	0.489	0.839	0.000228211	Rgs12
1.27135e-14	-0.334325	0.022	0.548	2.07218e-10	Smim22
6.09653e-07	-0.334024	0.967	0.935	0.00993674	Lrrfip1
9.42059e-07	-0.333865	0.7	0.855	0.0153546	Stxbp2
1.24579e-06	-0.333671	0.833	0.935	0.0203051	Strbp
2.44439e-05	-0.332698	0.9	0.935	0.398412	Itgb5
6.45154e-08	-0.33165	0.422	0.79	0.00105154	Baiap2
1.55912e-07	-0.329188	1	1	0.00254121	Rpl7
1.61796e-18	-0.328976	0.044	0.694	2.63711e-14	Gal3st1
2.00218e-07	-0.327861	0.989	1	0.00326335	Psmb6
5.18217e-05	-0.327318	0.967	0.952	0.844641	Nfib
1.60274e-06	-0.327131	0.933	1	0.026123	Eif3i
4.13721e-07	-0.326824	1	1	0.00674324	Cd63
1.42599e-05	-0.326747	0.511	0.565	0.232422	Serpinb9
2.02546e-08	-0.326294	0.744	0.919	0.000330129	Smu1
4.31083e-08	-0.326222	0.833	0.968	0.000702622	Sugt1
1.27496e-09	-0.325944	0.9	0.984	2.07806e-05	Unc50
9.1495e-09	-0.325402	0.6	0.887	0.000149128	Elovl7
1.93513e-05	-0.324685	0.367	0.645	0.315406	Nfil3
1.78427e-08	-0.324351	0.967	1	0.000290818	Tpd52
4.46901e-06	-0.32358	0.9	0.984	0.0728404	Shisa5
9.46381e-08	-0.323109	0.967	0.984	0.00154251	Spcs2
2.83216e-08	-0.323032	0.678	0.887	0.000461614	Acads
2.4306e-07	-0.322299	0.956	1	0.00396164	Uqcrc1
4.94748e-09	-0.322282	0.967	1	8.0639e-05	Tecr
0.000568819	-0.320006	0.756	0.935	1	Ypel3
6.56989e-08	-0.318452	0.056	0.419	0.00107083	Depdc7
1.28812e-08	-0.317815	0.989	1	0.00020995	Chmp5
1.0681e-10	-0.317727	0.122	0.613	1.7409e-06	Il18rap
9.22457e-08	-0.317173	0.933	0.968	0.00150351	Mtx2
8.02714e-05	-0.315963	0.789	0.952	1	Tmem43
1.64508e-05	-0.315883	0.756	0.935	0.268132	Atp11a
1.54589e-07	-0.315693	0.967	0.984	0.00251964	Bcap31
5.057e-08	-0.315435	0.6	0.855	0.00082424	Casp6
0.000638377	-0.315129	0.411	0.581	1	Il1rl1
3.00977e-09	-0.31458	0.5	0.806	4.90562e-05	Nipsnap1
7.57556e-05	-0.314394	0.856	0.952	1	Asns
1.10306e-22	-0.313993	0	0.661	1.79789e-18	Ildr1
6.60338e-07	-0.313982	0.978	1	0.0107628	Rsrc2
5.94876e-08	-0.313401	0.944	0.984	0.000969589	Bcas2
1.4493e-14	-0.313205	0.033	0.581	2.36221e-10	Tmem178
4.43252e-06	-0.313115	0.767	0.919	0.0722456	Brix1
3.14138e-18	-0.312823	0.011	0.613	5.12013e-14	Acer2
4.61607e-06	-0.312414	1	1	0.0752373	Lamp1
5.86346e-09	-0.31221	0.989	0.984	9.55685e-05	Cdc37
7.09061e-06	-0.312015	0.833	0.968	0.11557	Puf60
8.75483e-07	-0.310271	0.667	0.919	0.0142695	Pvrl2
4.90591e-06	-0.309578	0.978	1	0.0799615	Atp6v1f
4.97191e-05	-0.309373	0.378	0.694	0.810372	Rrad
1.24481e-06	-0.308371	0.078	0.387	0.0202891	Tesc
6.59731e-08	-0.30768	0.9	0.935	0.00107529	Pdcd10
5.53532e-06	-0.307516	0.578	0.855	0.0902202	Chka
1.62155e-10	-0.30698	0.089	0.581	2.64297e-06	Klk8
0.000757806	-0.305587	0.778	0.903	1	Col4a3
1.99307e-07	-0.30459	0.578	0.903	0.0032485	Ptk7
3.91689e-06	-0.304475	0.944	1	0.0638414	Glmp
2.3558e-08	-0.303482	0.989	0.968	0.000383972	Dnaja2
1.96412e-06	-0.303434	0.467	0.823	0.0320131	Syngr1
0.0030259	-0.303079	0.278	0.548	1	Adgra1
0.000141439	-0.302711	0.711	0.839	1	Smox
3.61954e-07	-0.302611	0.944	0.968	0.00589949	Psmd6
4.36262e-06	-0.302484	0.989	1	0.0711064	Eif3e
1.00541e-05	-0.302264	0.811	0.968	0.163871	Lad1
7.64649e-17	-0.30224	0.011	0.581	1.2463e-12	Dsg2
1.17085e-05	-0.300949	0.889	1	0.190837	Anxa7
2.55274e-08	-0.299886	0.211	0.629	0.000416071	Krt20
6.15092e-08	-0.299542	0.1	0.468	0.00100254	Apobec3
1.12407e-06	-0.299293	0.744	0.919	0.0183212	Zfp622
8.83246e-07	-0.298314	0.789	0.935	0.014396	Atg101
5.58976e-12	-0.298056	0.267	0.823	9.11074e-08	Chrnb1
0.00242321	-0.297491	1	1	1	Rpl3
1.58033e-06	-0.296805	0.867	0.968	0.0257579	Chmp2b
1.14307e-08	-0.296388	0.756	0.952	0.000186309	Glod4
8.33996e-05	-0.296173	0.978	1	1	Ndufa6
1.11229e-06	-0.295734	0.544	0.871	0.0181293	Chchd10
1.9576e-06	-0.295717	0.944	1	0.0319069	Atp6ap1
2.80857e-08	-0.295672	1	1	0.000457769	Cox4i1
1.22916e-06	-0.295361	0.822	0.903	0.0200342	Rtfdc1
1.35712e-06	-0.294455	0.967	1	0.0221196	Dctn3
2.52283e-09	-0.294124	0.411	0.823	4.11196e-05	Arrdc1
1.20118e-05	-0.293854	0.611	0.871	0.195781	Bbc3
3.75455e-07	-0.29366	0.267	0.629	0.00611954	Emb
1.795e-06	-0.292707	0.922	0.968	0.0292567	Akap9
9.3557e-06	-0.292496	0.878	0.919	0.152489	Ddx39
4.21018e-07	-0.292295	0.944	1	0.00686218	Prpf19
1.63767e-06	-0.292023	0.867	0.935	0.0266924	Anxa4
1.25703e-06	-0.291763	0.811	0.952	0.0204883	Rbm42
0.00775841	-0.291071	0.9	0.935	1	Camk2n1
0.00118291	-0.29097	0.467	0.677	1	Tiparp
3.23236e-06	-0.290797	0.911	0.919	0.0526842	Rras
4.63396e-06	-0.290497	0.989	0.984	0.0755289	Vasp
1.61884e-07	-0.290201	1	1	0.00263854	Eif3k
2.06606e-05	-0.290075	0.933	1	0.336747	Wdr61
1.49909e-06	-0.289983	0.867	0.984	0.0244337	Tmem63b
0.000422015	-0.289974	0.522	0.726	1	Akr1b3
2.97648e-09	-0.28985	0.756	0.968	4.85136e-05	Carkd
4.19074e-07	-0.289848	0.9	0.984	0.00683049	Adh5
2.16024e-06	-0.289191	0.978	1	0.0352097	Rraga
1.13938e-06	-0.289003	0.889	0.984	0.0185708	Bnip3l
2.2653e-15	-0.288901	0.078	0.677	3.69222e-11	Stap2
1.28553e-05	-0.288487	0.744	0.919	0.209528	Tapbp
6.06266e-07	-0.28838	0.656	0.903	0.00988153	Mpzl1
0.0875249	-0.288311	0.978	0.984	1	Dstn
2.39241e-06	-0.288189	0.989	1	0.0389939	Ube2b
1.45311e-05	-0.287847	0.567	0.774	0.236843	Cdh3
2.66607e-07	-0.287211	0.844	1	0.00434544	Phax
6.86258e-09	-0.286352	0.822	0.919	0.000111853	Stx8
1.99149e-09	-0.286311	0.4	0.855	3.24592e-05	Trp53i11
0.000151696	-0.286265	0.889	0.952	1	Arl2
8.697e-07	-0.285483	0.756	0.952	0.0141752	Polb
1.11138e-06	-0.285359	0.567	0.758	0.0181144	Tjp2
2.05491e-09	-0.284967	0.433	0.855	3.3493e-05	Nudt14
4.68368e-08	-0.284733	0.367	0.758	0.000763392	Flywch2
7.33524e-06	-0.284377	0.867	0.952	0.119557	Sac3d1
2.33073e-07	-0.284202	0.833	0.968	0.00379885	Vps72
4.90263e-05	-0.283608	1	1	0.79908	Glrx3
6.48063e-07	-0.282806	1	0.984	0.0105628	Med28
0.00401336	-0.280663	0.933	0.984	1	S100a1
9.81114e-06	-0.280187	0.967	1	0.159912	Ndufs6
5.48344e-06	-0.279991	0.967	1	0.0893746	Psmd4
1.09487e-05	-0.279921	0.633	0.871	0.178453	Fbxw9
1.3401e-05	-0.279821	0.689	0.935	0.218423	Pnrc1
4.82681e-06	-0.279424	0.889	1	0.0786722	Mat2b
1.36568e-07	-0.279273	0.344	0.677	0.00222592	Tcp11l1
1.35096e-05	-0.27863	0.989	1	0.220193	Srsf5
1.03791e-06	-0.278391	1	1	0.0169169	Clic1
7.51496e-06	-0.278182	0.267	0.581	0.122486	Bend5
1.98344e-05	-0.277739	0.733	0.871	0.32328	Hes6
1.32549e-05	-0.277463	1	1	0.216042	Tnfrsf12a
0.000453374	-0.277039	0.5	0.774	1	Trp53inp1
2.61377e-19	-0.276942	0.011	0.645	4.26019e-15	Irf6
2.17345e-06	-0.276876	0.678	0.871	0.0354251	Ppil2
3.59365e-07	-0.276787	1	0.984	0.0058573	Psmb1
6.82606e-05	-0.276601	0.978	0.984	1	Ppia
0.000129668	-0.27635	0.9	0.968	1	Ajuba
0.000199829	-0.276107	0.622	0.774	1	Kansl1l
1.48762e-06	-0.275958	0.189	0.565	0.0242468	Lrrn1
2.90073e-21	-0.2759	0	0.629	4.7279e-17	Marveld3
1.11756e-08	-0.27527	0.5	0.887	0.000182152	P4ha2
5.13488e-05	-0.275177	0.722	0.871	0.836935	Nabp1
3.6615e-06	-0.275143	0.056	0.355	0.0596789	Wnt10a
4.57738e-07	-0.274856	0.989	0.968	0.00746067	Tbcb
2.61639e-12	-0.274739	0.089	0.629	4.26446e-08	Blnk
1.17369e-06	-0.274711	0.878	0.984	0.0191299	Supt4a
0.000346475	-0.274579	1	1	1	Myl12a
2.37396e-05	-0.274097	0.844	0.952	0.386933	Syngr2
0.0265426	-0.273964	0.811	0.903	1	H1f0
1.18359e-05	-0.273192	1	1	0.192913	Rabac1
3.64949e-07	-0.273095	0.633	0.887	0.00594831	Stx3
4.15231e-06	-0.273029	1	0.984	0.0676786	Psmb5
2.5609e-05	-0.272616	0.811	0.919	0.417402	Thyn1
6.86085e-05	-0.272336	0.989	1	1	Psma6
1.1668e-06	-0.272122	0.844	0.935	0.0190177	Fam173a
2.17883e-05	-0.271512	0.922	0.984	0.355128	Trappc3
0.00278918	-0.27096	0.9	0.952	1	Bhlhe40
2.35343e-05	-0.270357	0.844	0.984	0.383586	Aga
6.56659e-06	-0.270234	0.367	0.645	0.107029	Col7a1
0.122491	-0.270029	0.8	0.855	1	Nfkbia
4.64846e-10	-0.26963	0.144	0.645	7.57653e-06	Tmem51
8.89415e-07	-0.268588	0.678	0.935	0.0144966	Tmem132a
7.0829e-07	-0.268436	0.989	0.984	0.0115444	Tomm22
1.95405e-07	-0.266737	0.767	0.952	0.00318491	Tm2d3
1.6545e-05	-0.266688	0.933	1	0.269667	Rnh1
6.95388e-07	-0.265478	0.678	0.871	0.0113341	Nfkbib
0.000271748	-0.265311	0.967	1	1	Ywhah
1.60026e-05	-0.265035	0.656	0.839	0.260827	Gprc5c
4.98333e-08	-0.264794	0.389	0.79	0.000812233	B4galt3
2.37249e-06	-0.264699	0.889	0.919	0.0386692	Actr10
2.92796e-08	-0.26443	0.656	0.903	0.000477229	Scamp2
4.3685e-05	-0.264026	0.778	0.903	0.712022	Mvb12a
2.33618e-05	-0.263956	0.711	0.903	0.380774	Necap2
1.88353e-05	-0.263637	0.944	1	0.306997	Csnk2b
3.71565e-06	-0.26286	0.989	1	0.0605613	Arpp19
3.97786e-07	-0.262689	0.844	0.968	0.00648351	Qars
8.28454e-05	-0.262364	0.122	0.419	1	Hspa1a
1.29011e-06	-0.26189	0.8	0.919	0.0210275	Hagh
0.00118938	-0.261758	0.611	0.806	1	Ctla2b
7.97607e-08	-0.260722	0.733	0.919	0.00130002	Hacd2
7.15794e-05	-0.260534	0.856	0.935	1	Dnpep
3.54405e-05	-0.260046	0.7	0.839	0.577645	Sh3bp4
2.09479e-06	-0.259413	0.589	0.871	0.0341429	Pacsin3
0.00162882	-0.25904	0.867	0.952	1	Fblim1
0.00237024	-0.258529	0.622	0.742	1	Endod1
6.15725e-18	-0.258095	0.022	0.645	1.00357e-13	Esrp1
7.23401e-06	-0.257858	0.978	1	0.117907	Ghitm
0.000638011	-0.257431	0.911	1	1	Cadm1
0.00517247	-0.257203	0.967	1	1	Sdc4
1.10308e-05	-0.257201	0.633	0.935	0.179791	Gjb3
4.93401e-07	-0.256744	0.922	1	0.00804195	Cers2
0.000401237	-0.255815	0.956	0.984	1	Cox7a2l
2.21742e-06	-0.255657	0.867	0.935	0.0361417	Acaa1a
3.62802e-05	-0.255346	0.889	0.935	0.591331	Snx6
9.03835e-05	-0.255329	0.978	1	1	Cct7
0.00269852	-0.254942	0.989	1	1	Gsn
2.13859e-05	-0.254769	0.522	0.79	0.348569	Hoxd9
2.16055e-05	-0.253964	0.556	0.79	0.352148	Mrps9
2.84583e-06	-0.253876	0.978	1	0.0463841	Dctn2
1.24835e-05	-0.253826	0.144	0.484	0.203469	Itm2a
0.0032955	-0.253565	0.756	0.855	1	Mgst3
5.62694e-07	-0.253393	0.867	1	0.00917135	Yipf3
0.000591933	-0.252771	1	1	1	Rpl10
5.55162e-12	-0.252427	0.033	0.516	9.04859e-08	Gmfg
1.01289e-08	-0.251851	0.2	0.645	0.00016509	Hook2
0.00032058	-0.25178	0.978	1	1	Rab18
5.102e-05	-0.251725	0.444	0.71	0.831575	Nudt22
0.000604373	-0.251684	0.989	1	1	Eif3f
6.62996e-06	-0.251641	0.678	0.79	0.108062	Cd99l2
0.000404166	-0.251278	1	1	1	Naca
8.53074e-06	-0.250488	0.722	0.79	0.139043	Hsdl2
3.62478e-06	-0.250458	0.433	0.758	0.0590803	Lpcat4
4.7184e-05	-0.250428	0.833	0.919	0.769052	Eif4a3
2.75348e-06	-0.250399	0.844	0.984	0.0448789	Spr
0.000244012	-0.250327	1	1	1	Pmepa1
2.71635e-05	-0.250175	0.989	1	0.442738	Cox5a
0.0143161	0.250784	0.967	0.984	1	Rras2
0.00224477	0.250892	1	0.968	1	Bicc1
1.57625e-08	0.251181	0.556	0.113	0.000256913	Clip3
0.000817031	0.252064	0.467	0.226	1	Tubb3
0.00406952	0.252347	1	1	1	Rps29
0.000246034	0.252569	0.544	0.306	1	Lpcat2
0.000909298	0.252957	0.9	0.774	1	Mical2
0.000596182	0.253042	0.978	0.968	1	Aprt
0.0115687	0.254569	0.933	0.919	1	Hmgb1
0.00213265	0.25466	1	1	1	Rps26
2.1868e-05	0.254861	0.922	0.774	0.356426	Arhgap1
6.128e-06	0.255918	0.822	0.581	0.0998802	Mmd
2.23011e-08	0.256008	0.622	0.177	0.000363485	Dclk1
0.318716	0.256108	1	1	1	Actb
0.00526841	0.25614	0.756	0.581	1	Pam
0.00247433	0.256322	1	0.984	1	Set
0.000413305	0.256356	0.978	0.968	1	Plscr2
5.09638e-05	0.256453	0.889	0.677	0.830658	Peak1
1.04256e-07	0.257545	0.589	0.177	0.00169927	Bcat1
1.2169e-07	0.257645	0.611	0.177	0.00198342	Creb3l1
0.000497784	0.257863	1	1	1	Arl6ip5
6.38048e-05	0.258548	0.944	0.839	1	Chp1
0.00429758	0.258718	0.267	0.081	1	Ccnb2
0.472984	0.259326	0.944	0.952	1	Nrep
0.000101408	0.259571	0.978	0.935	1	Sod1
5.63195e-05	0.260137	1	0.968	0.917952	S100a4
9.40694e-05	0.26051	0.989	0.968	1	B230219D22Rik
8.43017e-06	0.26098	0.967	0.968	0.137403	Pkig
0.0116426	0.261219	0.6	0.532	1	Smc2
0.0015769	0.262723	1	0.984	1	Atp5g1
0.0085608	0.262863	0.578	0.468	1	Tpx2
9.29373e-06	0.263832	0.922	0.774	0.151479	Hnrnpd
8.91385e-05	0.264088	0.767	0.468	1	Dusp6
9.46391e-05	0.264158	0.967	0.855	1	Foxp1
5.33155e-06	0.264374	1	1	0.0868989	Arhgdia
0.000121107	0.264508	0.989	0.984	1	Comt
0.0209869	0.264702	0.533	0.339	1	Sdpr
8.38379e-06	0.265005	1	0.968	0.136647	Mrfap1
6.19911e-14	0.265176	0.556	0.016	1.01039e-09	Adgra2
3.05146e-06	0.265792	0.633	0.258	0.0497358	Mxra7
2.79872e-07	0.266622	0.989	0.806	0.00456163	Map4
0.000325189	0.266878	0.267	0.048	1	Ccnb1
1.09274e-05	0.267406	0.344	0.048	0.178105	Gas1
6.92554e-06	0.267502	0.467	0.129	0.112879	Anln
0.000184446	0.267638	0.989	0.968	1	Gng12
0.0166875	0.267873	0.967	0.952	1	Smtn
0.000240175	0.268018	0.944	0.806	1	Cfap36
1.85504e-05	0.268608	0.944	0.823	0.302353	Ski
1.00878e-05	0.268842	0.811	0.452	0.164421	Hoxc10
0.000270748	0.269307	0.667	0.355	1	Tgm2
1.19592e-05	0.26932	0.8	0.5	0.194922	Eea1
1.48388e-06	0.269496	0.856	0.516	0.0241858	Jade1
0.000146533	0.269559	0.811	0.597	1	Enc1
0.00117897	0.269773	0.956	0.919	1	Degs1
7.10668e-08	0.269807	0.622	0.194	0.00115832	Adam19
4.72739e-06	0.269932	0.889	0.661	0.0770517	Sav1
0.000582523	0.270187	0.978	0.887	1	Ckap4
5.23891e-09	0.2703	0.722	0.258	8.5389e-05	Plekhh2
0.000289823	0.27072	0.344	0.097	1	Cdca3
3.27296e-09	0.271403	0.822	0.403	5.33459e-05	Pkp4
0.0584539	0.271502	0.844	0.774	1	Fxyd5
1.41121e-05	0.271939	0.978	0.871	0.230013	Kif1b
1.51557e-05	0.272269	0.956	0.887	0.247022	Nus1
0.035697	0.272817	0.867	0.758	1	Ccdc80
4.82212e-06	0.272867	0.878	0.565	0.0785957	Nab1
0.0300538	0.274132	1	1	1	Tceal8
2.56672e-07	0.274187	0.533	0.145	0.00418349	Slc29a1
1.10755e-05	0.275919	0.856	0.677	0.180519	Pcbp4
0.00912423	0.276895	0.833	0.823	1	Snhg9
1.39511e-06	0.278147	0.844	0.5	0.0227389	Tanc1
1.83727e-06	0.27817	1	0.952	0.0299457	Rbpms
3.16335e-06	0.279736	0.933	0.71	0.0515594	Oat
6.10779e-06	0.280647	0.678	0.387	0.0995509	Rai14
1.89748e-07	0.280691	0.678	0.339	0.0030927	Gcnt2
1.19244e-06	0.281543	0.844	0.694	0.0194355	Odc1
0.0678266	0.281785	0.967	0.919	1	Csf1
0.000126446	0.282261	1	0.984	1	Rrbp1
1.6643e-05	0.28269	0.9	0.677	0.271265	Myef2
3.71949e-05	0.28296	0.6	0.274	0.606239	Rrm1
0.00202311	0.283628	0.889	0.71	1	Snhg18
3.36557e-05	0.28363	0.711	0.403	0.548554	Impact
9.5744e-06	0.283693	0.778	0.452	0.156053	Pik3r1
0.000258952	0.284004	1	1	1	mt-Nd1
9.35181e-06	0.284377	0.922	0.806	0.152425	Eif4g3
3.98351e-06	0.284422	0.833	0.516	0.0649273	Fbn1
5.90117e-06	0.284933	0.944	0.758	0.0961832	Ppp1r18
0.106005	0.285306	0.944	0.952	1	Cks1b
0.000211049	0.285355	0.989	0.968	1	Mlec
0.0267167	0.285396	0.722	0.597	1	Slc39a1
3.49338e-06	0.285594	0.844	0.565	0.0569386	Fyn
1.56741e-05	0.285709	1	1	0.255472	Eif4g2
6.20058e-05	0.285859	0.989	0.968	1	Cisd1
3.59491e-06	0.286142	0.911	0.887	0.0585935	Zfp91
0.000178941	0.286565	0.733	0.484	1	Col4a5
0.00106721	0.286574	0.978	0.871	1	Prnp
0.000606327	0.286746	0.767	0.661	1	Tipin
0.00018792	0.287311	1	1	1	Serpinh1
0.0186931	0.287391	1	1	1	Rps12
0.0334671	0.287623	0.856	0.79	1	Csrp2
7.03308e-05	0.288429	0.978	0.984	1	Polr2l
0.000162649	0.290025	0.856	0.806	1	Nav2
6.34795e-07	0.290452	0.967	0.919	0.0103465	Bola3
0.00124945	0.290801	0.889	0.774	1	Srm
1.61622e-08	0.291413	0.778	0.387	0.000263428	Cmc2
1.70634e-07	0.292093	0.711	0.274	0.00278117	Nfia
0.000266699	0.292848	0.967	0.935	1	Igf1r
0.096056	0.292899	0.867	0.774	1	Dusp1
4.14891e-05	0.294018	0.956	0.871	0.67623	Cxxc5
0.00036163	0.29421	1	1	1	Rpl39
4.52743e-16	0.294217	0.7	0.065	7.37926e-12	Jam3
4.63659e-06	0.294692	0.878	0.613	0.0755718	Grb10
0.157941	0.296221	1	1	1	Thbs1
3.51339e-05	0.297328	0.944	0.806	0.572647	Phip
8.8593e-11	0.29798	0.889	0.403	1.44398e-06	P3h1
8.2571e-07	0.298123	0.867	0.597	0.0134582	Nolc1
0.000409928	0.298566	1	1	1	mt-Cytb
0.00333221	0.298728	0.889	0.887	1	Cebpb
0.0403503	0.298737	0.989	0.984	1	Abracl
8.41416e-06	0.299466	0.978	0.887	0.137142	Ssr1
0.000609348	0.299767	0.744	0.532	1	Prdx4
6.73678e-08	0.300015	0.722	0.387	0.00109803	Arhgap42
9.74527e-05	0.300202	0.978	0.871	1	Mbnl1
1.54053e-06	0.300555	0.811	0.597	0.025109	Oxct1
4.61506e-05	0.300795	0.622	0.323	0.752208	Cenpw
0.000100251	0.300964	0.811	0.661	1	Ugcg
0.000399853	0.301101	0.944	0.823	1	Ddx21
0.000133357	0.301975	0.978	0.952	1	Rbms1
1.03027e-07	0.302055	0.867	0.468	0.00167924	Cmtm3
0.00127955	0.302167	0.867	0.694	1	Pxdc1
2.35989e-06	0.303351	0.944	0.887	0.0384638	Nckap1
6.36104e-05	0.303651	0.9	0.677	1	Fgfr1
0.0355122	0.303672	0.867	0.758	1	Id2
2.68673e-09	0.304319	0.5	0.065	4.3791e-05	Tspan18
4.72016e-07	0.304663	0.978	0.935	0.00769338	Ryk
4.46391e-06	0.305778	0.878	0.565	0.0727572	Ctsz
1.71644e-05	0.306119	0.967	0.903	0.279763	Atp2a2
7.13505e-05	0.306295	0.922	0.661	1	Cav1
0.140473	0.306765	0.756	0.71	1	Serpine2
3.92429e-05	0.307251	0.933	0.79	0.639619	Wwtr1
6.13587e-09	0.308451	0.989	1	0.000100009	Oaz1
0.000299697	0.309027	0.989	0.984	1	Tomm5
2.82802e-07	0.310183	0.978	0.79	0.00460939	Spop
1.89588e-05	0.311376	1	0.968	0.309009	Chd3
0.000896519	0.311801	1	1	1	mt-Nd4
9.63747e-07	0.312119	0.833	0.645	0.0157081	Creb3l2
3.90382e-14	0.312973	0.7	0.097	6.36284e-10	Cd302
3.22871e-05	0.313289	0.933	0.823	0.526247	Pfn2
1.17731e-05	0.313412	0.967	0.935	0.191889	Sfpq
4.08759e-05	0.313782	0.978	0.952	0.666236	Cyb5r3
1.19069e-06	0.314538	0.944	0.919	0.0194071	Cdk2ap1
0.00332928	0.315857	1	1	1	Timp2
3.86925e-05	0.315923	0.867	0.71	0.630649	Kdelr3
1.65898e-05	0.320275	0.978	0.919	0.270397	Ext1
4.37041e-10	0.320522	0.756	0.29	7.12333e-06	Plekho1
9.56996e-07	0.321002	1	0.984	0.0155981	Nedd4
1.72708e-06	0.321323	0.889	0.629	0.0281496	Atxn1
1.02514e-05	0.321724	0.922	0.742	0.167088	Gls
7.98517e-05	0.321873	0.944	0.839	1	Samd4
4.77197e-10	0.322149	0.678	0.177	7.77783e-06	Ntn4
0.00678786	0.32271	0.922	0.79	1	Lurap1l
0.00189136	0.3228	1	1	1	Mfge8
0.0066758	0.323676	0.978	1	1	Jag1
2.90742e-08	0.323837	0.533	0.097	0.00047388	Tshz2
0.000145925	0.325082	0.833	0.71	1	Rusc2
6.94585e-06	0.325256	0.989	1	0.11321	Ptms
0.000125373	0.325502	0.989	0.935	1	Bgn
2.25727e-08	0.329044	0.644	0.194	0.000367912	Speg
1.30131e-12	0.329131	0.811	0.242	2.12101e-08	Soat1
4.6631e-08	0.330137	0.611	0.194	0.000760039	Tfpi
0.000322665	0.330802	0.611	0.339	1	Smc4
5.64524e-08	0.33106	0.9	0.532	0.000920118	Slc20a1
0.000342906	0.333759	1	1	1	Rplp1
0.00567663	0.334183	0.911	0.935	1	Palld
4.80812e-07	0.334421	0.867	0.645	0.00783675	Ehd2
5.47717e-06	0.334572	0.722	0.339	0.0892724	Nrp2
5.29535e-08	0.33536	0.911	0.661	0.000863089	Snx7
9.8565e-08	0.335438	0.989	0.903	0.00160651	Bin1
3.83491e-09	0.335532	0.789	0.339	6.25052e-05	Fads1
2.02713e-18	0.335791	0.756	0.065	3.30402e-14	Maf
7.20404e-10	0.338289	0.589	0.129	1.17419e-05	Nt5dc2
9.40269e-06	0.339003	1	0.984	0.153255	Calu
0.0249783	0.339808	1	1	1	Tuba1a
8.33888e-12	0.340211	0.7	0.177	1.35915e-07	Rasl12
7.937e-07	0.340338	0.967	0.952	0.0129365	Serf2
1.1087e-06	0.34082	0.6	0.194	0.0180708	Cp
7.91212e-10	0.343132	0.933	0.774	1.2896e-05	Rbfox2
4.24622e-07	0.343639	0.733	0.323	0.00692091	Gclc
4.72631e-11	0.343863	0.978	0.903	7.70341e-07	Scoc
1.33279e-07	0.344231	0.733	0.323	0.00217232	Vcan
0.00684116	0.344834	0.689	0.452	1	Notch2
6.13788e-06	0.345642	0.989	0.968	0.100041	Sptbn1
6.51448e-08	0.345873	1	0.984	0.0010618	Cfl2
2.31142e-07	0.347278	0.756	0.355	0.00376739	Angptl2
2.11551e-06	0.348153	0.733	0.403	0.0344807	Fkbp10
3.65884e-07	0.348842	0.989	0.839	0.00596354	Efemp2
5.75303e-06	0.351397	0.578	0.258	0.0937686	Hs6st2
0.000134797	0.351727	0.811	0.742	1	Dek
0.0065596	0.352377	1	1	1	Serpine1
3.11058e-08	0.352694	0.789	0.339	0.000506993	Gpc6
2.39134e-08	0.353384	0.967	0.919	0.000389764	Gde1
7.53853e-05	0.353392	0.989	0.871	1	Pdlim5
6.08674e-06	0.354333	0.767	0.5	0.0992078	Zdhhc2
8.30346e-07	0.354892	0.944	0.823	0.0135338	Hmgn3
8.05745e-06	0.35512	0.522	0.161	0.131328	Gsta4
3.04762e-06	0.355301	0.878	0.806	0.0496732	Glipr2
5.26497e-05	0.357942	0.756	0.435	0.858138	Srd5a1
2.6197e-08	0.358053	0.989	0.919	0.000426986	Mbnl2
2.15969e-05	0.360022	1	1	0.352007	P4hb
6.57848e-14	0.360152	0.844	0.29	1.07223e-09	Lix1l
6.0283e-05	0.360166	0.867	0.629	0.982553	Itga5
7.74074e-08	0.360889	0.589	0.177	0.00126166	Map3k7cl
0.00108378	0.361475	0.267	0.065	1	Cenpf
3.75596e-08	0.362766	0.9	0.661	0.000612183	Wsb2
6.74517e-07	0.362833	0.956	0.903	0.010994	Tspan4
5.83127e-08	0.363014	0.933	0.694	0.000950438	Hoxa10
9.67784e-10	0.369061	0.833	0.371	1.57739e-05	Pcdh7
2.66222e-09	0.369267	0.889	0.516	4.33916e-05	Frmd4a
2.09897e-06	0.370011	0.989	0.903	0.0342111	Cdk6
2.23161e-05	0.371346	1	1	0.36373	Rpl41
7.03204e-07	0.371539	0.967	1	0.0114615	Sh3bgrl
2.09964e-06	0.372153	0.744	0.387	0.0342221	Gng11
0.000367316	0.372289	0.4	0.145	1	Prc1
0.000462063	0.372466	0.956	0.774	1	Col1a2
2.38064e-05	0.372649	0.978	0.968	0.38802	Ddah1
2.69572e-09	0.372827	0.911	0.548	4.39375e-05	P4ha1
2.89347e-07	0.377591	0.378	0.032	0.00471606	Bmp4
9.13699e-07	0.379068	0.978	0.887	0.0148924	Mllt11
1.18992e-07	0.380701	0.8	0.435	0.00193945	Camk2d
6.27647e-11	0.381429	0.7	0.194	1.023e-06	Hspb8
8.10947e-07	0.382957	0.811	0.581	0.0132176	Smim1
5.92624e-06	0.385507	1	0.984	0.0965917	Prdx6
0.00011977	0.386995	0.944	0.887	1	Spns2
2.32595e-08	0.387738	1	0.968	0.000379107	Sept11
1.28783e-11	0.387855	0.756	0.21	2.09903e-07	Ptprn
3.46328e-05	0.388784	0.622	0.306	0.56448	Col8a1
1.89142e-08	0.391827	0.811	0.435	0.000308283	Pdgfc
0.000271601	0.392819	0.378	0.113	1	Cdc20
0.00417358	0.394208	0.467	0.21	1	Sprr1a
0.0019507	0.394764	0.922	0.79	1	Col5a2
8.98117e-10	0.395101	0.889	0.79	1.46384e-05	Pold4
0.00316878	0.395298	0.333	0.161	1	Cenpa
6.26256e-05	0.396626	0.822	0.629	1	Npnt
1.88622e-09	0.397805	0.967	0.919	3.07435e-05	Atp1b3
0.000142959	0.397827	0.622	0.484	1	Hmgb2
0.00016627	0.398724	0.967	0.823	1	Adamts5
0.000172751	0.399075	0.989	0.984	1	Ivns1abp
8.33081e-08	0.402637	0.856	0.516	0.00135784	Parm1
7.78549e-06	0.402851	0.989	0.968	0.126896	Zyx
5.6593e-11	0.402999	1	1	9.2241e-07	Msn
3.57847e-07	0.404265	0.867	0.532	0.00583255	Sh3kbp1
0.0134961	0.404707	0.478	0.258	1	Cox6b2
7.58701e-05	0.404906	0.911	0.855	1	Hk2
0.000111249	0.405607	1	1	1	Tpt1
1.95408e-07	0.406057	0.967	0.758	0.00318496	Oxr1
0.000190013	0.407221	0.578	0.371	1	Proser2
7.94242e-10	0.408169	0.989	0.935	1.29453e-05	Mprip
5.14168e-13	0.411022	1	0.79	8.38042e-09	Rcn1
2.57704e-12	0.411983	0.611	0.081	4.20031e-08	Kcnk12
3.3439e-18	0.415408	0.878	0.21	5.45022e-14	Zeb2
1.11648e-06	0.419802	0.844	0.548	0.0181976	Aldh1a2
5.53665e-08	0.420791	0.533	0.129	0.000902418	Lmod1
0.000111931	0.422579	0.944	0.823	1	Ptgs2
2.84792e-08	0.42556	0.978	0.919	0.000464182	Lmo4
0.00181041	0.427122	0.478	0.339	1	Birc5
1.43477e-08	0.42803	0.711	0.355	0.000233853	Rcn3
1.17229e-05	0.429603	0.933	0.677	0.191072	Wisp1
1.88427e-07	0.430433	0.889	0.742	0.00307118	Nr2f2
9.55694e-09	0.431151	0.811	0.435	0.000155769	Ank
1.16388e-09	0.440282	0.978	0.919	1.89701e-05	Coro1c
0.000364115	0.442293	0.367	0.161	1	Top2a
4.49238e-07	0.442995	0.911	0.726	0.00732213	Unc5b
4.37546e-10	0.444137	1	0.984	7.13156e-06	Nap1l1
1.5075e-07	0.44632	0.767	0.532	0.00245707	Arhgap29
9.83869e-06	0.446339	0.989	0.903	0.160361	Crlf1
6.32593e-05	0.448898	1	1	1	Tmsb10
1.48587e-06	0.450718	1	0.935	0.0242182	Ybx3
0.000334132	0.452123	1	1	1	Ftl1
7.42134e-07	0.456862	0.833	0.581	0.012096	Errfi1
8.3808e-10	0.458301	0.989	0.952	1.36599e-05	Wnk1
4.02883e-10	0.460887	0.978	0.823	6.56658e-06	Tead1
4.38358e-11	0.461546	0.544	0.065	7.1448e-07	Fgf7
1.77615e-11	0.463913	0.933	0.613	2.89494e-07	Loxl1
8.79881e-10	0.464091	0.922	0.79	1.43412e-05	Ghr
3.83725e-05	0.464213	0.944	0.871	0.625433	Lox
3.6554e-11	0.468121	0.789	0.29	5.95794e-07	Gm2115
0.00137789	0.470447	0.967	0.935	1	Tnc
0.0027	0.471311	0.522	0.323	1	Cdk1
2.17939e-10	0.475319	0.933	0.565	3.55218e-06	Flnc
6.26626e-10	0.476457	0.911	0.661	1.02134e-05	Zfp503
7.50377e-09	0.477562	0.722	0.29	0.000122304	Siglecg
7.98842e-08	0.477662	0.856	0.581	0.00130203	Rbp1
2.65897e-10	0.477876	0.989	0.984	4.33386e-06	Rock2
7.95383e-07	0.478306	0.989	0.903	0.0129639	Fermt2
4.13717e-10	0.478491	0.956	0.79	6.74318e-06	Acly
0.920749	0.478712	1	1	1	Ctsl
8.36021e-07	0.479535	0.978	0.968	0.0136263	Tns1
1.319e-05	0.482456	0.944	0.774	0.214983	Uchl1
1.59638e-10	0.482673	0.844	0.435	2.60194e-06	Col5a1
4.40989e-06	0.485931	0.989	0.903	0.0718768	Fhl2
1.47006e-06	0.496959	0.989	0.968	0.0239605	Lpp
0.0014202	0.497865	0.567	0.387	1	Rrm2
9.45515e-08	0.50345	0.433	0.048	0.00154109	Lmcd1
4.54745e-08	0.503832	1	0.935	0.000741189	Zbtb20
0.00423711	0.505296	0.967	0.952	1	Hbegf
3.31168e-05	0.510825	0.989	1	0.539771	Cryab
3.56927e-05	0.511749	0.956	0.79	0.581755	Metrnl
0.0157814	0.51246	0.933	0.855	1	Col1a1
4.31707e-09	0.51994	0.989	0.952	7.03639e-05	Pea15a
2.3827e-09	0.521439	0.856	0.581	3.88356e-05	Vgll3
7.52041e-09	0.523435	0.967	0.952	0.000122575	Cmtm7
6.40446e-06	0.527907	0.867	0.565	0.104386	Plat
3.83308e-07	0.52923	0.933	0.71	0.00624754	Klhdc8a
0.150517	0.530453	0.744	0.871	1	Plac8
8.31375e-13	0.533195	0.667	0.129	1.35506e-08	Foxc1
1.55289e-11	0.53532	1	1	2.53106e-07	1810037I17Rik
1.53318e-07	0.537624	0.922	0.806	0.00249893	Spry1
2.00056e-09	0.54126	0.922	0.661	3.26071e-05	Egfr
7.42152e-07	0.5415	0.911	0.645	0.0120963	Hmga2
4.85518e-12	0.542214	0.956	0.855	7.91346e-08	Msi2
1.5068e-08	0.544417	0.9	0.887	0.000245593	Dut
2.84663e-12	0.54445	0.911	0.484	4.63973e-08	Ammecr1
6.59984e-09	0.547217	0.989	0.887	0.000107571	Cd44
7.47765e-13	0.550346	0.878	0.565	1.21878e-08	Dpysl2
6.11056e-11	0.550575	0.989	0.952	9.9596e-07	Axl
2.51976e-08	0.552068	1	1	0.000410696	Cald1
4.62941e-13	0.553112	1	0.952	7.54547e-09	Nrp1
1.27296e-12	0.55313	1	0.935	2.07481e-08	Plod2
4.36476e-09	0.556895	0.8	0.403	7.11412e-05	Tgfb1i1
1.60765e-13	0.558366	0.989	0.839	2.62031e-09	Steap2
0.000215089	0.565	0.978	0.968	1	Tuba1b
2.8098e-09	0.566128	0.578	0.145	4.5797e-05	Mustn1
4.06947e-13	0.570533	1	0.839	6.63283e-09	Clic4
4.99815e-14	0.575317	0.967	0.823	8.14648e-10	Ppfibp1
0.000408502	0.575847	0.556	0.371	1	Tgfb3
1.10519e-11	0.58005	0.8	0.403	1.80135e-07	Lrp1
1.12281e-06	0.58967	0.956	0.919	0.0183007	Tinagl1
4.45427e-11	0.596782	0.956	0.903	7.26001e-07	F2r
1.16692e-09	0.599239	0.622	0.194	1.90197e-05	Galnt18
0.00724447	0.614352	0.444	0.306	1	Ube2c
1.2812e-08	0.616705	0.911	0.887	0.000208823	Sox11
4.39155e-10	0.618427	1	0.968	7.15779e-06	Timp1
1.59117e-09	0.623829	1	1	2.59345e-05	B2m
3.95485e-12	0.626265	0.9	0.758	6.44602e-08	Lbh
1.40203e-13	0.636279	0.989	0.79	2.28516e-09	Ptrf
7.4979e-06	0.638048	0.911	0.79	0.122208	Clcf1
2.90945e-11	0.640514	0.789	0.258	4.74211e-07	Car2
1.69065e-08	0.655371	0.989	0.774	0.00027556	Timp3
1.24777e-12	0.669996	1	1	2.03374e-08	Lgals1
2.43138e-10	0.67141	1	1	3.96291e-06	S100a6
2.12285e-08	0.671427	0.722	0.306	0.000346003	Flrt2
3.31157e-12	0.692403	0.978	0.839	5.39753e-08	Lhfp
0.000567757	0.701147	0.611	0.355	1	Meg3
2.484e-11	0.709427	0.833	0.613	4.04867e-07	Nes
6.57163e-12	0.714597	0.978	0.774	1.07111e-07	Gxylt2
1.90855e-11	0.716927	0.856	0.419	3.11074e-07	Pdpn
6.91608e-21	0.721885	0.822	0.113	1.12725e-16	Meis2
0.0108272	0.722652	1	0.968	1	Csrp1
1.60151e-17	0.733066	0.956	0.565	2.6103e-13	Cdh11
4.57012e-06	0.734033	1	1	0.0744884	Acta2
1.90482e-15	0.736528	0.856	0.355	3.10467e-11	Aebp1
3.97308e-07	0.74994	0.256	0	0.00647572	Igfbp5
1.22647e-16	0.751595	1	0.855	1.99903e-12	Dst
4.55744e-17	0.752703	1	1	7.42818e-13	Tsc22d1
1.50886e-11	0.75557	0.978	0.726	2.45929e-07	Fscn1
7.877e-14	0.759444	0.989	0.774	1.28387e-09	Eva1b
4.6543e-16	0.775177	0.967	0.903	7.58604e-12	Crim1
1.14268e-12	0.802131	0.933	0.71	1.86245e-08	Emp3
9.34182e-11	0.855984	1	0.935	1.52262e-06	Slc6a6
3.50682e-11	0.868429	1	0.887	5.71577e-07	Ccnd2
4.36368e-06	0.869703	0.4	0.129	0.0711237	2810417H13Rik
8.8599e-16	0.932013	0.956	0.597	1.44408e-11	Nid1
3.12075e-17	0.933054	0.956	0.581	5.08651e-13	Dlc1
3.98208e-18	0.950788	0.933	0.5	6.49039e-14	Loxl2
3.1558e-16	0.963312	1	1	5.14364e-12	Fth1
3.02579e-05	0.968419	0.989	0.935	0.493173	Ankrd1
1.56284e-14	0.996322	0.956	0.645	2.54728e-10	Fhl1
3.47653e-21	0.999558	1	0.726	5.66639e-17	Fstl1
1.15455e-19	1.01304	0.889	0.323	1.8818e-15	Dkk3
1.72797e-18	1.01766	0.933	0.516	2.81641e-14	Peg3
2.31443e-20	1.03908	0.989	0.823	3.77228e-16	Ncam1
2.95231e-08	1.08745	0.844	0.581	0.000481197	Fst
2.31291e-19	1.13141	1	0.903	3.76981e-15	Akap12
2.94957e-11	1.21079	0.767	0.452	4.80751e-07	Cnn1
7.71352e-08	1.24096	0.6	0.21	0.00125723	Havcr1
1.44741e-24	1.25344	0.978	0.581	2.35914e-20	Cotl1
4.55075e-27	1.29653	1	0.839	7.41726e-23	Col4a2
4.1582e-26	1.3125	1	1	6.77746e-22	Sparc
9.62238e-23	1.34454	0.933	0.387	1.56835e-18	Cyp1b1
1.49947e-13	1.46318	0.944	0.839	2.44398e-09	Myl9
9.82426e-19	1.47466	0.933	0.532	1.60126e-14	Inhba
1.78215e-14	1.67037	1	0.839	2.90473e-10	Tagln
2.05514e-33	1.72363	1	0.855	3.34967e-29	Col4a1
4.86304e-07	1.77742	0.744	0.403	0.00792627	Igfbp2
1.52077e-53	2.02834	1	0.968	2.47871e-49	Vim
4.4187e-11	2.16687	0.767	0.274	7.20204e-07	Il11
1.39358e-30	2.37781	0.989	0.758	2.2714e-26	Gpx3

## Sheet: FindMarkers_Heart2_1
p_val	avg_logFC	pct.1	pct.2	p_val_adj	gene
7.59579e-35	1.29431	1	0.989	1.23804e-30	Acta2
1.53819e-26	1.0878	0.997	0.989	2.5071e-22	Tagln
2.64916e-20	1.07461	0.888	0.495	4.31787e-16	Wisp2
1.81142e-37	1.00971	0.997	0.968	2.95243e-33	Lox
1.8755e-32	0.952661	0.985	0.839	3.05687e-28	Col8a1
9.89906e-20	0.896806	0.985	0.957	1.61345e-15	Myl9
6.02488e-21	0.895676	1	0.989	9.81996e-17	Timp1
5.81266e-23	0.846107	1	1	9.47405e-19	Actb
1.33174e-21	0.834561	0.997	0.914	2.17061e-17	Tpm2
2.26104e-32	0.812697	0.973	0.699	3.68526e-28	Wisp1
6.83873e-32	0.803326	0.997	0.935	1.11465e-27	Vamp5
3.8884e-25	0.772407	0.994	0.957	6.3377e-21	Prss23
4.30115e-30	0.754211	1	1	7.01045e-26	Serpine1
9.74357e-11	0.728649	0.939	0.849	1.5881e-06	Fhl1
3.45785e-25	0.700281	0.997	0.968	5.63595e-21	Csf1
5.48521e-19	0.696214	0.921	0.656	8.94034e-15	Fam101b
2.18033e-20	0.693438	0.997	0.989	3.55372e-16	Tuba1b
1.23762e-06	0.667377	0.482	0.204	0.020172	Crct1
1.99146e-18	0.646001	0.985	0.849	3.24588e-14	Col3a1
1.89684e-41	0.638109	1	1	3.09166e-37	Actn1
1.07262e-33	0.628423	0.994	0.989	1.74826e-29	Ahnak
4.13086e-24	0.627333	0.994	0.968	6.73289e-20	Lpp
7.94643e-09	0.601063	0.645	0.323	0.000129519	Ccl17
4.54902e-23	0.583087	1	0.989	7.41444e-19	Anxa1
7.35875e-24	0.552504	0.997	0.935	1.1994e-19	Cryab
9.9759e-20	0.542029	0.997	1	1.62597e-15	Col1a1
2.0945e-18	0.539345	0.933	0.581	3.41382e-14	Gdf6
1.647e-19	0.536109	0.994	0.957	2.68445e-15	Akap12
2.0053e-11	0.531129	0.948	0.763	3.26843e-07	Igf1
3.36841e-18	0.529447	0.961	0.667	5.49017e-14	Sdpr
7.85106e-11	0.529136	0.988	0.925	1.27964e-06	Timp3
1.06213e-16	0.527062	0.806	0.43	1.73116e-12	Npnt
5.21803e-18	0.513923	0.994	0.946	8.50487e-14	Emp1
2.79141e-20	0.51094	0.918	0.57	4.54973e-16	Aldh1a1
2.69964e-24	0.509905	0.997	0.925	4.40014e-20	Cd44
2.24964e-27	0.507039	1	1	3.66668e-23	Serpinh1
3.65894e-17	0.503245	0.994	0.989	5.96371e-13	Ctgf
3.77549e-24	0.50135	0.997	0.946	6.15367e-20	Myadm
2.06409e-07	0.495769	0.736	0.462	0.00336426	Glipr1
1.92023e-26	0.492635	1	1	3.12978e-22	Lgals1
2.46297e-23	0.490942	1	1	4.0144e-19	Myl6
1.51393e-19	0.489643	0.997	0.968	2.46755e-15	Col1a2
2.03681e-23	0.488988	1	0.968	3.3198e-19	Cnn2
3.75864e-17	0.480197	0.982	0.828	6.12621e-13	Plod2
5.72897e-23	0.479684	0.994	0.925	9.33764e-19	Fat1
3.2516e-20	0.477712	1	1	5.29979e-16	Flna
3.60582e-19	0.474956	0.976	0.817	5.87713e-15	Col5a1
1.89591e-11	0.470203	0.997	0.989	3.09014e-07	Manf
4.87803e-21	0.463557	0.927	0.527	7.95069e-17	Tnfrsf11b
2.81771e-23	0.463021	0.994	0.903	4.59259e-19	Axl
2.42911e-24	0.45869	1	0.957	3.9592e-20	Anxa3
1.36025e-17	0.457421	0.988	0.903	2.21707e-13	Fbn1
6.24502e-17	0.452723	0.679	0.215	1.01788e-12	Gjb3
8.07605e-12	0.447954	1	1	1.31632e-07	Tpm1
6.30544e-13	0.438281	0.83	0.505	1.02772e-08	Col11a1
0.00403684	0.437651	0.621	0.473	1	Igfbp2
2.867e-21	0.43271	0.997	1	4.67293e-17	Dynll1
2.00849e-19	0.431569	0.985	0.892	3.27364e-15	Hacd1
2.24664e-06	0.423719	0.8	0.624	0.036618	Thy1
2.81365e-12	0.42294	0.952	0.763	4.58597e-08	Fbln5
5.78233e-24	0.418371	0.997	0.968	9.42462e-20	Pea15a
1.34111e-21	0.416518	1	0.957	2.18588e-17	Cltb
6.12756e-17	0.411019	0.973	0.763	9.98731e-13	Ddah1
8.60174e-16	0.410458	0.979	0.828	1.402e-11	Bdnf
5.49411e-15	0.409533	0.942	0.731	8.95485e-11	Col12a1
1.66166e-15	0.409484	0.988	0.978	2.70834e-11	Flnb
1.45095e-17	0.406243	1	0.989	2.3649e-13	S100a4
1.36318e-22	0.405466	0.997	1	2.22185e-18	Actn4
2.42221e-22	0.404898	1	1	3.94796e-18	Myl12a
1.96922e-25	0.404087	1	1	3.20963e-21	Tpm4
3.41458e-16	0.403776	0.967	0.796	5.56542e-12	Rab3ip
3.32397e-14	0.401122	0.997	0.935	5.41775e-10	Ankrd1
1.21205e-07	0.39836	1	1	0.00197551	Thbs1
2.5329e-07	0.396806	0.997	1	0.00412837	S100a10
3.70357e-16	0.39616	0.897	0.656	6.03645e-12	Zdhhc2
9.52657e-12	0.393062	1	0.978	1.55274e-07	Ccnd2
1.43754e-24	0.389764	0.964	0.796	2.34304e-20	Map6
4.07522e-10	0.387555	0.991	0.989	6.6422e-06	Kdelr2
4.92327e-21	0.386672	0.788	0.269	8.02443e-17	Scel
3.87561e-19	0.386255	1	0.968	6.31686e-15	Myo1c
6.31697e-20	0.386194	0.994	0.978	1.0296e-15	Ptrf
1.93988e-10	0.384954	0.982	0.946	3.16181e-06	Msrb1
0.000322321	0.382446	0.976	0.914	1	Crip1
4.54558e-16	0.381997	0.682	0.258	7.40884e-12	Slc1a6
3.72255e-17	0.38136	1	1	6.06739e-13	Pfn1
5.31035e-13	0.37945	0.988	1	8.65534e-09	Ybx3
7.13855e-16	0.379131	0.988	0.925	1.16351e-11	Sept11
1.37184e-08	0.376428	0.785	0.495	0.000223597	Lurap1l
2.60073e-15	0.375574	0.855	0.441	4.23893e-11	Adamts5
3.51083e-18	0.370663	0.985	0.892	5.7223e-14	Copz2
6.0919e-12	0.36916	0.988	0.849	9.92919e-08	Loxl2
5.55595e-17	0.36906	0.955	0.731	9.05564e-13	Celf2
2.97688e-12	0.366366	0.967	0.882	4.85201e-08	Spcs3
3.77867e-12	0.365583	0.991	0.935	6.15885e-08	Tns1
5.12741e-16	0.364751	1	1	8.35717e-12	Cald1
0.00555429	0.363393	0.97	0.946	1	Mgp
1.66177e-13	0.363151	0.985	0.871	2.70852e-09	Ppa1
2.43079e-13	0.362905	0.83	0.527	3.96194e-09	Ereg
3.13476e-08	0.362632	0.973	0.871	0.000510934	Hes1
3.84693e-15	0.358419	0.945	0.817	6.27011e-11	Npm3
5.75861e-10	0.358386	0.991	0.914	9.38596e-06	Lbh
3.15846e-14	0.356705	0.994	0.957	5.14797e-10	Fam198b
7.91342e-10	0.356187	0.882	0.634	1.28981e-05	Fkbp11
4.33763e-13	0.355235	1	1	7.06991e-09	Rplp1
2.1514e-14	0.35511	0.997	1	3.50657e-10	Abracl
2.57932e-12	0.352961	0.997	0.989	4.20403e-08	Pmepa1
9.51305e-10	0.351345	0.994	0.946	1.55053e-05	Tubb6
6.14071e-20	0.350583	0.985	0.978	1.00087e-15	Capn2
3.49305e-11	0.346947	0.991	0.978	5.69333e-07	Ppp1r14b
4.69064e-14	0.346364	0.994	0.935	7.64527e-10	Mcfd2
2.73176e-09	0.344997	0.982	0.839	4.45249e-05	Pdpn
5.53195e-13	0.343756	0.997	0.978	9.01652e-09	Ccng1
2.64064e-10	0.343406	0.973	0.828	4.30398e-06	Pmp22
1.71161e-11	0.338213	1	1	2.78975e-07	Eif5a
3.41063e-18	0.338159	0.985	0.968	5.55898e-14	Hras
5.74832e-05	0.337207	0.967	0.957	0.936918	Tnc
1.97201e-12	0.33452	0.988	0.892	3.21418e-08	Fkbp10
1.05121e-07	0.333324	0.991	0.989	0.00171337	Myh9
5.30375e-12	0.32868	1	1	8.64458e-08	Nme1
3.89852e-13	0.32843	0.991	0.968	6.3542e-09	Tomm5
7.71942e-13	0.327592	1	0.968	1.25819e-08	Ostc
5.12024e-10	0.325489	1	0.968	8.34548e-06	Col5a2
1.17611e-14	0.324623	0.994	0.86	1.91694e-10	Basp1
7.40062e-16	0.323566	1	0.946	1.20623e-11	Lhfp
3.08933e-17	0.323308	0.818	0.366	5.0353e-13	Ldlr
6.15085e-09	0.322941	0.997	0.989	0.000100253	Ranbp1
1.56256e-11	0.31992	0.982	0.935	2.54682e-07	Fads3
4.02559e-16	0.319168	0.915	0.613	6.5613e-12	Gpr176
2.40197e-14	0.318512	0.988	1	3.91498e-10	Gng12
4.83277e-15	0.318396	1	0.989	7.87693e-11	Comt
2.95422e-07	0.317502	0.982	1	0.00481509	Card19
7.93282e-08	0.317493	1	1	0.00129297	Calr
9.6393e-13	0.316307	0.991	0.892	1.57111e-08	Srm
4.84111e-08	0.316187	0.739	0.473	0.000789052	Ltbp2
1.08065e-13	0.316073	0.815	0.462	1.76135e-09	Loxl3
4.7622e-11	0.315766	1	1	7.76191e-07	Rps2
6.65999e-15	0.310693	0.997	0.978	1.08551e-10	Tnfrsf12a
5.98334e-16	0.308805	0.812	0.355	9.75225e-12	Siglecg
1.91893e-07	0.307912	0.988	0.978	0.00312767	Dstn
1.80394e-09	0.30764	1	0.968	2.94023e-05	Emp3
1.49792e-16	0.305165	0.985	0.71	2.44146e-12	Vgll3
9.0091e-14	0.302836	0.924	0.688	1.46839e-09	Pvrl3
9.87553e-12	0.302024	0.909	0.667	1.60961e-07	Rrm1
3.09109e-06	0.301523	0.958	0.903	0.0503817	Ptprb
2.25365e-16	0.300318	0.997	0.968	3.67322e-12	Surf4
2.33884e-09	0.299629	1	1	3.81208e-05	S100a6
1.31921e-09	0.299106	1	1	2.15018e-05	Rpl41
4.82031e-10	0.298683	0.967	0.882	7.85662e-06	Sdc2
1.45533e-13	0.298518	1	1	2.37205e-09	Atp5g1
1.17474e-12	0.298276	0.997	0.989	1.91471e-08	Serp1
6.29814e-15	0.297693	0.782	0.409	1.02653e-10	Pcdh19
3.34051e-10	0.295679	0.997	0.957	5.4447e-06	Eva1b
1.41655e-11	0.29417	1	0.978	2.30883e-07	Ckap4
1.3822e-13	0.294017	0.991	0.978	2.25285e-09	Mprip
3.82749e-10	0.291987	1	1	6.23843e-06	Rpl12
3.67076e-13	0.291959	0.991	0.914	5.98298e-09	Adam9
1.33396e-07	0.291719	1	1	0.00217422	Calm2
0.0299623	0.289749	0.476	0.376	1	Ube2c
2.9552e-09	0.289643	0.818	0.548	4.81669e-05	Ncam1
0.0025247	0.288643	0.897	0.785	1	Slc39a1
1.53155e-11	0.288625	1	1	2.49627e-07	Rpl39
8.35325e-13	0.288076	0.994	1	1.3615e-08	Ssr1
1.3544e-10	0.286952	1	0.989	2.20753e-06	Snhg6
7.58206e-12	0.286034	0.93	0.72	1.2358e-07	Adam19
0.00193544	0.284922	0.879	0.763	1	Gxylt2
1.86461e-15	0.28378	0.912	0.548	3.03913e-11	Hs6st2
2.93975e-07	0.28368	0.997	0.978	0.0047915	Ldha
8.56297e-11	0.282667	0.991	1	1.39568e-06	1810037I17Rik
1.56958e-10	0.282543	0.994	0.989	2.55826e-06	P4hb
9.05592e-10	0.281573	0.958	0.742	1.47602e-05	Srpx2
2.0558e-11	0.280871	0.994	0.989	3.35075e-07	Hdlbp
4.29854e-13	0.280619	0.985	0.892	7.00619e-09	Bola3
4.15697e-08	0.280161	0.994	0.914	0.000677545	Ccdc80
9.39129e-08	0.279584	0.891	0.645	0.00153069	Cyp1b1
7.15464e-09	0.279052	0.973	0.849	0.000116613	Metrnl
5.24117e-13	0.277419	0.997	0.935	8.54258e-09	Ehd2
2.47529e-15	0.277257	0.997	0.968	4.03448e-11	Naa38
7.67094e-06	0.277208	0.897	0.72	0.125029	Sox9
5.45334e-10	0.276277	0.982	0.946	8.88839e-06	Gatad1
5.59905e-05	0.274734	0.827	0.742	0.912589	Msmo1
2.47669e-09	0.274243	1	1	4.03675e-05	Rps13
1.03703e-08	0.272593	0.994	0.968	0.000169026	Ilk
1.10381e-06	0.271154	1	1	0.017991	S100a11
1.60573e-07	0.270941	0.976	0.935	0.00261717	2310022B05Rik
5.97857e-10	0.269288	0.985	0.892	9.74447e-06	Tead1
4.09848e-11	0.268432	0.988	0.989	6.68012e-07	Ppfibp1
6.88563e-11	0.267506	0.994	0.957	1.12229e-06	Wsb2
5.91544e-08	0.264492	0.955	0.86	0.000964158	Glipr2
1.13412e-07	0.263872	0.958	0.892	0.00184849	Ahcyl1
0.000593099	0.262578	0.988	0.957	1	Crlf1
1.29079e-08	0.262384	1	1	0.000210386	Rps20
1.08988e-05	0.261696	0.973	0.925	0.17764	Tubb2a
5.77859e-07	0.259406	0.994	1	0.00941852	Ran
6.62347e-08	0.259265	1	1	0.00107956	Rps12
1.59099e-08	0.258666	0.927	0.785	0.000259316	Fstl3
1.56099e-10	0.257905	0.973	0.892	2.54427e-06	Tns3
3.17074e-10	0.257336	0.988	0.978	5.16799e-06	Tln1
5.70954e-09	0.257206	0.882	0.645	9.30597e-05	Jph2
1.99637e-08	0.256949	0.706	0.366	0.000325389	Cemip
1.97892e-08	0.256868	1	1	0.000322544	Sec61b
2.02561e-08	0.256817	1	1	0.000330154	Hspe1
2.93924e-10	0.254616	0.979	0.882	4.79067e-06	Sec61g
1.93075e-10	0.254454	0.948	0.849	3.14693e-06	Idh3a
3.72206e-11	0.252924	0.958	0.839	6.06659e-07	Ergic1
2.95763e-09	0.251866	0.982	0.946	4.82065e-05	Ap2a2
1.77563e-09	0.25077	0.803	0.484	2.8941e-05	Cyp51
2.68271e-10	0.250504	0.991	0.849	4.37254e-06	Loxl1
1.22718e-11	-0.250719	0.912	0.957	2.00019e-07	Zfand6
3.16011e-12	-0.251297	0.9	0.882	5.15066e-08	Mafg
9.93427e-09	-0.251851	0.979	0.978	0.000161919	Ube2r2
1.22732e-14	-0.252103	0.897	0.828	2.0004e-10	Inppl1
8.9159e-13	-0.252197	0.782	0.925	1.4532e-08	Znrf1
1.2695e-17	-0.252503	0.745	0.849	2.06915e-13	Igbp1
2.7772e-06	-0.252738	0.973	0.968	0.0452655	Ctsh
8.58154e-10	-0.253032	0.87	0.946	1.39871e-05	Cpd
0.0531742	-0.254497	0.997	1	1	Wbp5
6.04795e-15	-0.254995	0.47	0.72	9.85755e-11	Pir
3.20462e-10	-0.255434	0.894	0.978	5.2232e-06	Psme2
1.05094e-11	-0.255798	0.988	0.978	1.71293e-07	Park7
5.87503e-08	-0.255959	0.997	0.989	0.000957572	Ifitm2
7.80657e-13	-0.256307	0.948	1	1.27239e-08	Bcas2
2.92194e-12	-0.257091	0.742	0.839	4.76248e-08	Cat
3.54533e-09	-0.257949	0.821	0.892	5.77854e-05	Akap13
5.59361e-11	-0.258014	0.736	0.871	9.11702e-07	Psme1
4.80367e-12	-0.258136	0.427	0.677	7.8295e-08	BC028528
0.00035455	-0.258716	0.794	0.645	1	Adm
0.000343889	-0.259811	0.961	0.957	1	Mdm2
5.94367e-09	-0.26072	0.409	0.634	9.68758e-05	Renbp
0.000126363	-0.261245	0.915	0.925	1	Efhd2
1.00757e-08	-0.261585	0.436	0.602	0.000164224	Fam19a5
6.84728e-16	-0.261669	0.739	0.839	1.11604e-11	Ssbp3
2.7933e-12	-0.261767	0.964	0.957	4.5528e-08	Fubp1
4.01349e-09	-0.262011	0.964	0.914	6.54159e-05	Pmm1
3.32848e-09	-0.262072	0.476	0.645	5.4251e-05	Tgfbr1
2.03032e-07	-0.26243	0.309	0.43	0.00330922	Cgnl1
8.05449e-15	-0.26246	0.676	0.871	1.3128e-10	Gnpda2
4.68827e-16	-0.263672	0.855	0.946	7.6414e-12	Ddrgk1
6.20157e-21	-0.264226	0.355	0.753	1.01079e-16	Gdpd1
5.42631e-12	-0.264483	0.533	0.763	8.84435e-08	Dpp7
1.95689e-08	-0.264614	0.994	1	0.000318954	Aldoa
3.86837e-08	-0.264866	0.964	0.989	0.000630506	Zwint
2.39248e-13	-0.26559	0.452	0.688	3.8995e-09	Syt11
1.05606e-10	-0.266584	0.979	0.989	1.72127e-06	St13
2.35344e-13	-0.266747	0.209	0.505	3.83587e-09	Acot1
2.29043e-10	-0.267886	0.991	0.989	3.73317e-06	Prkar1a
6.15694e-12	-0.268254	0.639	0.753	1.00352e-07	Ndrg2
2.34684e-08	-0.268281	1	1	0.000382512	Hsp90ab1
1.44087e-12	-0.268459	0.991	0.989	2.34848e-08	Sdcbp
2.87379e-09	-0.268635	0.924	0.957	4.68398e-05	Serf1
8.3058e-05	-0.269207	0.648	0.656	1	Ctla2b
5.94522e-19	-0.26942	0.758	0.935	9.69011e-15	Wbp2
1.24323e-18	-0.269611	0.936	0.957	2.02635e-14	Atp6v1c1
0.000966735	-0.269841	0.985	0.978	1	Prdx4
9.86131e-11	-0.269892	0.906	0.978	1.60729e-06	Atraid
1.89812e-06	-0.269928	0.87	0.882	0.0309375	Pxdn
0.00447015	-0.270266	0.997	0.968	1	Id3
5.26814e-14	-0.270565	0.945	0.935	8.58655e-10	Klhdc2
5.8939e-12	-0.270942	0.964	0.978	9.60646e-08	Sod1
2.04199e-14	-0.271007	0.945	0.946	3.32824e-10	Dnaja1
3.32843e-07	-0.271924	0.452	0.538	0.00542501	Fam46a
5.53798e-12	-0.273078	0.833	0.903	9.02636e-08	Atp6v1h
5.85074e-12	-0.273559	0.976	0.989	9.53612e-08	Psmd11
3.82137e-09	-0.274646	0.912	0.978	6.22845e-05	Tgoln1
1.153e-07	-0.275066	1	1	0.00187928	Psma7
6.29275e-14	-0.275269	0.721	0.871	1.02566e-09	Dcaf13
0.000196447	-0.275323	0.997	0.978	1	Hspb1
2.99763e-07	-0.275707	0.67	0.796	0.00488583	Ddit4
1.3494e-12	-0.275806	0.885	0.946	2.19938e-08	Fam32a
0.000854859	-0.276719	0.479	0.548	1	Bst2
0.000315718	-0.277424	0.306	0.409	1	Ucp2
2.94638e-09	-0.277921	0.364	0.376	4.80231e-05	Fam43a
4.13152e-10	-0.278144	0.8	0.731	6.73396e-06	Angptl2
1.45367e-09	-0.278345	0.988	1	2.36933e-05	Eif3e
9.12785e-13	-0.278895	0.2	0.548	1.48775e-08	Abca1
0.0188502	-0.279171	0.97	0.989	1	Cited2
4.89469e-11	-0.281146	0.176	0.452	7.97786e-07	Mfap2
5.40878e-11	-0.281311	0.961	0.882	8.81578e-07	Rnase4
1.39682e-07	-0.281591	0.661	0.806	0.00227667	Ank
2.5878e-06	-0.281688	0.952	0.935	0.0421785	Ppp3ca
3.71596e-12	-0.282379	0.979	0.978	6.05664e-08	Psmd2
1.56168e-08	-0.283035	0.661	0.774	0.000254538	Ece1
1.93031e-05	-0.283618	1	1	0.314622	H3f3b
1.04551e-14	-0.283686	0.945	0.946	1.70407e-10	Atp6v1d
3.81992e-08	-0.284551	0.888	0.914	0.000622608	Trim47
5.80999e-13	-0.284756	0.645	0.828	9.46971e-09	Plin3
1.41597e-16	-0.28479	0.618	0.763	2.3079e-12	Amdhd2
2.52989e-20	-0.287119	0.852	0.925	4.12346e-16	Cyth2
4.81611e-17	-0.287264	0.964	0.925	7.84977e-13	Spg21
5.96106e-09	-0.287472	0.924	0.914	9.71593e-05	Anp32a
4.76906e-15	-0.287802	0.933	0.957	7.77309e-11	Dazap2
1.7997e-12	-0.28858	0.994	1	2.93332e-08	Ddx5
8.99067e-09	-0.28872	0.091	0.269	0.000146539	S1pr1
0.00511455	-0.288926	0.888	0.882	1	Hist1h1c
1.05726e-09	-0.289135	0.352	0.602	1.72323e-05	Col18a1
4.32089e-06	-0.289166	0.939	0.957	0.0704262	Pgd
5.33796e-11	-0.289415	0.648	0.688	8.70033e-07	Ptgr1
2.16199e-11	-0.290154	0.976	0.989	3.52383e-07	Med28
1.40861e-13	-0.290332	0.555	0.667	2.2959e-09	Gclc
0.0214247	-0.290862	0.942	0.957	1	Sgk1
7.73671e-11	-0.2911	0.927	0.957	1.26101e-06	Map4k4
2.48676e-07	-0.291675	1	1	0.00405317	Clic1
3.16245e-11	-0.292341	0.973	0.989	5.15448e-07	Serinc1
8.65947e-25	-0.294574	0.497	0.753	1.41141e-20	Crem
2.19541e-06	-0.295156	1	1	0.0357829	Rtn4
3.88737e-08	-0.295798	0.842	0.806	0.000633602	Jun
3.06871e-09	-0.295908	0.173	0.409	5.00169e-05	Gsta3
3.55022e-07	-0.296187	0.994	1	0.0057865	Psmb6
3.48714e-15	-0.296849	0.879	0.935	5.68369e-11	Adh5
0.984117	-0.297745	0.891	0.892	1	Spp1
0.000410553	-0.298377	1	1	1	Igfbp7
2.89499e-09	-0.29859	0.779	0.839	4.71855e-05	Irf2bpl
4.62768e-11	-0.29886	0.903	0.892	7.54266e-07	Fcgrt
4.26524e-10	-0.299103	0.064	0.29	6.95191e-06	Mmrn2
2.04532e-12	-0.299152	0.861	0.903	3.33367e-08	B4galt1
5.33725e-15	-0.300163	0.83	0.914	8.69918e-11	Mpzl1
0.000130956	-0.302144	1	1	1	Cd63
1.62493e-06	-0.30223	0.988	0.968	0.0264847	Tsc22d1
1.35752e-11	-0.30244	0.997	1	2.21262e-07	Clta
7.07006e-15	-0.302552	0.245	0.581	1.15235e-10	Ctnnal1
6.1971e-05	-0.302625	1	1	1	Ftl1
1.095e-12	-0.302947	0.945	0.978	1.78474e-08	Mapk3
4.13961e-14	-0.303031	0.988	0.989	6.74715e-10	Psmd4
1.12262e-17	-0.303146	0.739	0.742	1.82976e-13	Irf2bp2
1.10207e-09	-0.304085	0.955	0.978	1.79626e-05	Aplp2
4.3285e-10	-0.304469	0.997	1	7.05502e-06	Tmem50a
1.1644e-10	-0.305127	0.906	0.968	1.89786e-06	Atp6ap2
3.16092e-24	-0.306028	0.588	0.806	5.15198e-20	Cbr1
7.59858e-08	-0.306527	0.715	0.785	0.00123849	Btg2
1.16094e-15	-0.310887	0.948	1	1.89222e-11	Adrm1
1.08576e-16	-0.312224	0.867	0.968	1.76968e-12	Frg1
1.50418e-16	-0.312532	0.948	0.989	2.45166e-12	Supt4a
2.12386e-12	-0.312826	0.985	1	3.46169e-08	Paip2
1.25126e-08	-0.313543	1	1	0.000203942	Npc2
2.10775e-09	-0.313787	0.679	0.753	3.43542e-05	Serpini1
2.4482e-08	-0.313829	0.23	0.484	0.000399032	Ch25h
8.36961e-07	-0.315253	0.742	0.72	0.0136416	Cdc42ep3
2.40434e-17	-0.31612	0.561	0.871	3.91884e-13	Pnrc1
1.20151e-12	-0.316886	0.588	0.828	1.95835e-08	Smpdl3a
7.05278e-08	-0.316978	0.721	0.774	0.00114953	Sdc1
2.53847e-16	-0.317851	0.797	0.925	4.13746e-12	Trappc6a
0.000437674	-0.319109	0.961	0.968	1	Junb
2.61045e-19	-0.319697	0.736	0.903	4.25477e-15	Coq7
9.4221e-07	-0.321404	0.83	0.57	0.0153571	Fst
9.24212e-09	-0.321475	1	0.989	0.000150637	Atp6v0b
3.18847e-20	-0.321581	0.903	0.935	5.19688e-16	Asna1
3.75751e-21	-0.322322	0.452	0.72	6.12436e-17	Slc12a2
9.20626e-26	-0.323767	0.652	0.849	1.50053e-21	Laptm4b
5.6154e-13	-0.3257	0.991	0.978	9.15254e-09	Chic2
2.32189e-07	-0.326043	0.988	0.968	0.00378445	Capg
3.6663e-08	-0.327526	0.994	1	0.00059757	Cd81
1.35191e-17	-0.328807	0.948	0.935	2.20347e-13	Wwtr1
9.71447e-12	-0.329747	0.918	0.892	1.58336e-07	Scarb2
3.79458e-10	-0.330012	1	1	6.18479e-06	Laptm4a
3.60681e-12	-0.331327	0.997	0.989	5.87874e-08	1810058I24Rik
1.5091e-14	-0.331956	0.785	0.946	2.45969e-10	Arhgap31
1.48001e-08	-0.332012	0.848	0.742	0.000241226	Tcf21
4.13431e-11	-0.333267	1	1	6.73851e-07	Eef2
2.70445e-20	-0.334246	0.724	0.914	4.40798e-16	Atg101
3.29642e-15	-0.33447	0.924	0.946	5.37283e-11	Spag9
7.24689e-09	-0.334822	0.197	0.43	0.000118117	Ramp2
1.89384e-14	-0.33668	0.952	1	3.08677e-10	Dctn3
5.25573e-09	-0.336908	0.994	1	8.56631e-05	Mfge8
1.38718e-06	-0.337107	0.961	0.968	0.0226097	Zfos1
1.64027e-09	-0.337418	0.83	0.882	2.67347e-05	Pla2g12a
9.32592e-12	-0.339119	0.933	0.968	1.52003e-07	Tpp1
2.01449e-07	-0.33931	0.497	0.581	0.00328342	Ly6a
1.11161e-20	-0.340092	0.479	0.849	1.81182e-16	Bnip3
6.13577e-09	-0.340817	0.945	0.871	0.000100007	Bok
6.91646e-18	-0.341654	0.967	0.978	1.12731e-13	Atp6v1e1
2.79631e-16	-0.345103	0.855	0.892	4.5577e-12	Gabarapl1
4.7372e-14	-0.345572	0.955	0.989	7.72116e-10	Eif3m
3.30904e-13	-0.346517	1	0.989	5.39341e-09	Atpif1
0.000542101	-0.350507	0.861	0.699	1	Cav1
0.0148919	-0.351251	0.994	1	1	Sat1
6.89278e-10	-0.351462	0.97	0.989	1.12345e-05	Rnh1
1.5013e-17	-0.351812	0.967	0.978	2.44697e-13	Ptov1
4.876e-12	-0.352234	0.976	0.989	7.94739e-08	Serinc3
7.27026e-09	-0.354281	0.976	0.978	0.000118498	Jund
2.79859e-16	-0.355142	0.83	0.892	4.56142e-12	Ier2
0.000298887	-0.356139	1	1	1	Fth1
1.37979e-16	-0.356322	0.63	0.882	2.24891e-12	Ctxn1
0.00064001	-0.357213	0.985	0.989	1	Cdkn1a
2.65111e-18	-0.357483	0.348	0.645	4.32104e-14	Mmp11
7.62792e-11	-0.357614	1	1	1.24328e-06	B2m
1.76538e-11	-0.357655	0.979	0.989	2.87739e-07	Vmp1
6.80094e-09	-0.358666	0.655	0.624	0.000110849	Olfml3
1.22525e-07	-0.360557	0.476	0.581	0.00199704	Serping1
3.0788e-18	-0.361023	0.667	0.871	5.01814e-14	Tead2
6.62815e-08	-0.364592	0.327	0.527	0.00108032	Cd34
4.14401e-14	-0.364827	0.955	0.935	6.75432e-10	Hexa
3.1633e-16	-0.365525	0.988	1	5.15587e-12	Cdk4
8.61413e-17	-0.366579	0.752	0.892	1.40402e-12	Rbpms
8.04381e-20	-0.366619	0.961	0.978	1.31106e-15	Oaz2
2.24579e-18	-0.366709	0.703	0.914	3.66042e-14	Tcn2
2.77569e-23	-0.366725	0.512	0.774	4.5241e-19	Hbp1
9.39889e-11	-0.369316	0.994	1	1.53193e-06	Arpc3
1.22466e-21	-0.369601	0.752	0.903	1.99607e-17	Pink1
2.51684e-20	-0.370011	0.761	0.892	4.1022e-16	Msi2
4.29338e-07	-0.372685	0.991	0.968	0.00699777	Txndc5
7.46692e-10	-0.377969	0.994	1	1.21703e-05	Prr13
2.31066e-12	-0.37997	0.955	0.935	3.76615e-08	Fgfr1
3.30255e-19	-0.381145	0.961	1	5.38282e-15	Ubxn1
7.55969e-13	-0.381857	1	1	1.23215e-08	Lamp1
1.95264e-19	-0.382989	0.888	0.957	3.1826e-15	Nfe2l2
7.78567e-17	-0.385709	0.761	0.839	1.26899e-12	Idh1
5.35461e-08	-0.386054	0.564	0.774	0.000872748	Stmn1
2.4358e-10	-0.386751	0.264	0.441	3.97011e-06	F11r
1.46977e-09	-0.387151	0.412	0.559	2.39557e-05	Cygb
2.06019e-05	-0.387608	0.991	0.989	0.33579	Nid1
2.21601e-19	-0.387784	0.891	0.978	3.61187e-15	Grina
2.44508e-09	-0.391054	0.948	0.978	3.98524e-05	Creg1
1.13984e-17	-0.39271	0.945	0.968	1.85783e-13	Aldh2
6.5845e-22	-0.393034	0.988	0.989	1.07321e-17	Ube2b
4.03007e-24	-0.393698	0.855	0.946	6.56862e-20	Cmtm3
0.00460803	-0.394231	1	1	1	Fkbp1a
4.23913e-15	-0.394289	0.988	1	6.90936e-11	Atp6v1f
1.47535e-06	-0.394434	0.324	0.409	0.0240468	Mdk
0.0151449	-0.402285	1	1	1	Malat1
3.89658e-20	-0.406409	0.906	0.957	6.35103e-16	Mfsd1
5.94837e-17	-0.411633	0.976	1	9.69524e-13	Smim14
1.30324e-06	-0.411877	0.979	1	0.0212414	Cd9
2.80157e-14	-0.412056	0.839	0.914	4.56627e-10	Lgmn
3.01708e-11	-0.41208	0.691	0.796	4.91754e-07	B4galt5
4.41664e-15	-0.412441	0.994	1	7.19869e-11	Atp5f1
1.82933e-24	-0.412877	0.748	0.903	2.98163e-20	Hexb
6.57037e-12	-0.413138	0.973	0.989	1.0709e-07	Ugdh
1.71961e-17	-0.415075	0.988	1	2.8028e-13	H3f3a
1.53321e-06	-0.420561	0.879	0.817	0.0249897	Tubb3
2.29151e-18	-0.42719	0.939	0.989	3.73493e-14	Gltscr2
1.32764e-12	-0.427991	0.976	0.957	2.16393e-08	Prdx6
1.01805e-10	-0.430525	0.976	0.925	1.65932e-06	Ecm1
4.93636e-20	-0.436062	0.958	0.978	8.04578e-16	Rap1a
1.67226e-16	-0.439128	0.967	1	2.72561e-12	Psap
1.32855e-13	-0.443743	0.788	0.882	2.16541e-09	Gas6
0.000194949	-0.443904	0.582	0.688	1	Ddit3
2.24543e-14	-0.447094	0.994	1	3.65982e-10	Atp6v1g1
0.00514935	-0.450493	0.903	0.925	1	Id2
6.07209e-09	-0.451967	0.876	0.914	9.8969e-05	Mmd
0.00428883	-0.452985	0.988	0.989	1	Hist1h2bc
6.38798e-17	-0.455255	1	1	1.04118e-12	Tmem59
8.38863e-16	-0.458224	0.894	0.946	1.36726e-11	Plin2
5.56353e-19	-0.462749	0.918	0.978	9.06799e-15	Glmp
2.32837e-10	-0.466169	0.821	0.882	3.79501e-06	Mmp2
5.64492e-16	-0.467292	0.97	0.914	9.20065e-12	Mxra8
6.72661e-15	-0.468972	0.852	0.935	1.09637e-10	Tmem176b
1.24564e-42	-0.471526	0.794	0.968	2.03027e-38	Bnip3l
1.13375e-08	-0.473879	0.718	0.742	0.00018479	Nqo1
7.76654e-12	-0.475468	0.982	0.989	1.26587e-07	Txnrd1
3.34992e-22	-0.477147	0.955	1	5.46003e-18	Psma5
1.92788e-13	-0.480905	0.882	0.946	3.14225e-09	Tcf4
6.6322e-23	-0.482759	0.915	0.978	1.08098e-18	H2afv
1.6343e-15	-0.48527	0.518	0.742	2.66374e-11	Cda
3.03177e-24	-0.486721	0.958	0.968	4.94148e-20	Rsrp1
2.31498e-05	-0.490885	0.824	0.871	0.377318	Serpine2
6.73661e-20	-0.496275	0.161	0.591	1.098e-15	Car8
5.04498e-25	-0.498246	0.894	0.935	8.22281e-21	Zfand5
8.02595e-12	-0.501977	0.915	0.914	1.30815e-07	Ahnak2
1.2392e-07	-0.502462	0.561	0.452	0.00201977	Ecscr
1.32093e-16	-0.503428	0.982	0.978	2.15298e-12	Grn
2.9763e-19	-0.508784	0.945	1	4.85108e-15	Ctsa
0.00100741	-0.508887	0.912	0.892	1	Gpx3
1.3318e-25	-0.509897	0.979	1	2.1707e-21	Ctnnb1
6.6166e-12	-0.514031	0.906	0.935	1.07844e-07	Uchl1
8.47644e-26	-0.514287	0.982	0.989	1.38157e-21	Ndufa6
1.13081e-24	-0.517578	0.712	0.839	1.84311e-20	Uap1l1
1.37675e-13	-0.518368	0.927	0.978	2.24396e-09	H2-D1
2.70484e-07	-0.52538	0.979	0.968	0.00440862	Neat1
8.77857e-23	-0.526547	1	1	1.43082e-18	Map1lc3b
1.19451e-10	-0.529987	0.133	0.28	1.94693e-06	Cd93
7.40247e-12	-0.531761	0.939	0.935	1.20653e-07	Slc3a2
2.31651e-25	-0.544849	0.979	0.978	3.77568e-21	Lamp2
2.07244e-15	-0.546147	0.797	0.903	3.37787e-11	Sepp1
3.62809e-19	-0.549938	1	1	5.91342e-15	Ptma
3.81019e-31	-0.551016	0.648	0.796	6.21023e-27	Ddah2
1.9504e-15	-0.55732	0.691	0.849	3.17896e-11	Gpnmb
4.98051e-19	-0.557818	0.812	0.925	8.11774e-15	Blvrb
1.30055e-12	-0.56664	0.997	1	2.11977e-08	Prdx1
1.75101e-18	-0.56715	0.518	0.806	2.85397e-14	Casp6
1.45731e-20	-0.579544	1	1	2.37527e-16	Ctsd
1.07785e-19	-0.595877	1	1	1.75678e-15	Ubb
5.1954e-12	-0.597974	0.833	0.871	8.46798e-08	Vcam1
3.3743e-17	-0.607532	0.982	1	5.49977e-13	Taldo1
8.48746e-19	-0.618634	0.994	1	1.38337e-14	Itm2b
1.13166e-13	-0.620758	0.327	0.602	1.8445e-09	Nr4a1
4.46105e-23	-0.625472	0.948	0.882	7.27107e-19	Cebpb
4.41154e-26	-0.627636	0.742	0.882	7.19037e-22	Srxn1
0.000955598	-0.629167	0.803	0.806	1	Dcn
3.6459e-24	-0.634894	0.942	0.978	5.94244e-20	Marcksl1
2.2755e-19	-0.640766	0.409	0.677	3.70884e-15	Gadd45a
0.304697	-0.64438	1	0.989	1	Tm4sf1
2.9321e-09	-0.687426	0.861	0.849	4.77902e-05	Lgals3
1.98016e-25	-0.690344	0.988	1	3.22746e-21	Ctsb
1.38895e-20	-0.692816	0.536	0.849	2.26385e-16	Procr
2.80335e-11	-0.697511	0.176	0.366	4.56917e-07	Apoe
6.6053e-44	-0.699951	0.8	0.946	1.0766e-39	Ypel3
8.05355e-09	-0.7008	0.427	0.398	0.000131265	Bmp4
2.32976e-12	-0.71742	0.391	0.613	3.79728e-08	Pdlim3
2.99788e-24	-0.721736	0.997	1	4.88624e-20	Esd
0.00312331	-0.775229	0.491	0.355	1	Ccl7
4.66907e-26	-0.809451	0.885	0.968	7.61012e-22	Gclm
8.48905e-13	-0.819815	0.355	0.613	1.38363e-08	Gsta4
1.2749e-27	-0.834163	0.897	0.957	2.07796e-23	Gstm1
8.02049e-17	-0.846349	1	1	1.30726e-12	Ctsl
1.78416e-11	-0.944404	0.327	0.441	2.90801e-07	Egfl7
3.42927e-22	-0.950702	0.806	0.86	5.58937e-18	Mt2
3.28763e-24	-0.961984	0.952	0.968	5.35851e-20	Sox4
1.22481e-43	-1.07082	0.882	1	1.99631e-39	Mgst1
5.92364e-35	-1.08475	0.736	0.903	9.65493e-31	Cd24a
9.92973e-14	-1.08552	0.752	0.839	1.61845e-09	Clu
7.55652e-20	-1.10026	0.812	0.86	1.23164e-15	Hmox1
2.29088e-19	-1.12647	0.664	0.559	3.7339e-15	Edn1
2.11018e-47	-1.17737	0.976	1	3.43938e-43	Sqstm1
6.67105e-07	-1.47774	0.973	0.968	0.0108732	Ctla2a
3.71733e-34	-1.55095	0.942	0.978	6.05887e-30	Mt1
0.00577186	-1.7045	0.588	0.495	1	Ccl2
1.87518e-10	-1.78578	0.427	0.258	3.05636e-06	Esm1
2.43515e-13	-2.03867	0.112	0.28	3.96905e-09	Emcn
