# Supplementary material for: Adult mouse fibroblasts retain organ-specific transcriptomic identity
Source: eLife. 2022 Mar 16;11:e71008. doi: 10.7554/eLife.71008 (PMC8959603; doi:10.7554/eLife.71008)
Supplement: Figure 5—source data 1. — KEGG pathways analysis. [file elife-71008-fig5-data1.xlsx]

## Sheet: guide RNAs
Guide #	Guide Name	IDT oligo sequence	Protospacer Sequence	Chr	Strand	Start-End
7353	Tbx20_sgRNA2	taatacgactcactatagCAAATTCCATGAACTGGGCAgtttaagagctatgctggaaac	CAAATTCCATGAACTGGGCA	9	-	24770708-24770727
7354	Tbx20_sgRNA3	taatacgactcactataGAGCTGCTCGCCAGTAAAGGgtttaagagctatgctggaaac	GAGCTGCTCGCCAGTAAAGG	9	+	24765732-24765751
7358	Gata4_sgRNA1	taatacgactcactatagCAGAGAGTGTGTCAATTGTGgtttaagagctatgctggaaac	CAGAGAGTGTGTCAATTGTG	14	-	63204711-63204730
7360	Gata4_sgRNA3	taatacgactcactataGCAGGACTGGGCTGTCGAAGgtttaagagctatgctggaaac	GCAGGACTGGGCTGTCGAAG	14	+	63240581-63240600
7361	NTC_sgRNA1	taatacgactcactataGCGAGGTATTCGGCTCCGCGgtttaagagctatgctggaaac	GCGAGGTATTCGGCTCCGCG	n/a	n/a	n/a
7362	NTC_sgRNA2	taatacgactcactataGCTTTCACGGAGGTTCGACGgtttaagagctatgctggaaac	GCTTTCACGGAGGTTCGACG	n/a	n/a	n/a

## Sheet: Tbx20vsCTR
Feature.ID	FC	log2FC_Tbx20_vs_control	logCPM	PValue	FDR	Chromosome	Start	End	Strand	Symbol	Description	Tbx20.a_GT18.10892_CAATTAAC.ATATCTCG_S6.genes.results_counts_cpm	Tbx20.b_GT18.10893_TGGCCGGT.GCGCTCTA_S8.genes.results_counts_cpm	Tbx20.c_GT18.10894_AGTACTCC.AACAGGTT_S3.genes.results_counts_cpm	cont.a_GT18.10901_GGTCACGA.CATAATAC_S5.genes.results_counts_cpm	cont.b_GT18.10902_CTGCTTCC.GATCTATC_S1.genes.results_counts_cpm	cont.c_GT18.10903_TCATCCTT.AGCTCGCT_S2.genes.results_counts_cpm	pos.mean	neg.mean
ENSMUSG00000045799	-59.1588	-5.88652	4.17854	3.5645e-228	4.54723e-224	14	8799589	8800504	-1	Gm9800	predicted gene 9800 [Source:MGI Symbol;Acc:MGI:3710580]	0	0	2.43959	59.2221	0	92.1466	0.813198	50.4562	#NUM!	#DIV/0!	#NUM!	#NUM!	#DIV/0!	#NUM!	-4.60142	#DIV/0!	-5.23922
ENSMUSG00000072680	78.8066	6.30024	1.2695	7.92822e-78	5.05701e-74	14	26063919	26067355	-1	Tmem254c	transmembrane protein 254c [Source:MGI Symbol;Acc:MGI:3711260]	0.0236373	4.68805	7.39347	0.136018	0	0	4.03505	0.0453392	-2.52466	#DIV/0!	#DIV/0!	5.10712	#DIV/0!	#DIV/0!	5.76438	#DIV/0!	#DIV/0!
ENSMUSG00000089739	-18.3463	-4.19742	0.370141	7.69684e-55	3.27295e-51	2	167607850	167661496	-1	Gm20431	predicted gene 20431 [Source:MGI Symbol;Acc:MGI:5141896]	0	0	0.497876	5.98478	0	3.80048	0.165959	3.26175	#NUM!	#DIV/0!	#NUM!	#NUM!	#DIV/0!	#NUM!	-3.58744	#DIV/0!	-2.93232
ENSMUSG00000083405	-6.38443	-2.67456	1.66966	2.64589e-48	8.4384e-45	16	37882542	37883631	1	Gm15725	predicted gene 15725 [Source:MGI Symbol;Acc:MGI:3833682]	1.30005	0	1.41895	8.51471	0	10.014	0.906332	6.17623	-2.71139	#DIV/0!	-2.94538	#NUM!	#DIV/0!	#NUM!	-2.58514	#DIV/0!	-2.81912
ENSMUSG00000082475	-6.09911	-2.6086	0.902328	4.41678e-44	1.1269e-40	14	45713344	45713723	1	Gm7206	predicted pseudogene 7206 [Source:MGI Symbol;Acc:MGI:3646634]	1.53642	1.55212	0	0	18.3991	0	1.02952	6.13304	#DIV/0!	-3.58199	#DIV/0!	#DIV/0!	-3.56732	#DIV/0!	#DIV/0!	#NUM!	#DIV/0!
ENSMUSG00000050578	3.79299	1.92334	3.03626	5.32427e-39	1.13203e-35	9	7272514	7283331	1	Mmp13	matrix metallopeptidase 13 [Source:MGI Symbol;Acc:MGI:1340026]	17.8934	18.7839	17.575	5.46791	4.13841	4.6752	18.0841	4.76051	1.71037	2.11228	1.93633	1.78043	2.18235	2.00639	1.68447	2.08638	1.91043
ENSMUSG00000073060	-344.415	-8.428	-1.34115	3.19589e-33	5.82428e-30	X	94795563	94798183	-1	Zxda	zinc finger, X-linked, duplicated A [Source:MGI Symbol;Acc:MGI:1921689]	0	0	0	1.27857	0	2.29235	0	1.19031	#NUM!	#DIV/0!	#NUM!	#NUM!	#DIV/0!	#NUM!	#NUM!	#DIV/0!	#NUM!
ENSMUSG00000098369	297.024	8.21444	-1.24853	8.00052e-30	1.27578e-26	14	26156036	26163648	1	Gm2274	predicted gene 2274 [Source:MGI Symbol;Acc:MGI:3780444]	1.72552	1.33039	0	0	0	0	1.01864	0	#DIV/0!	#DIV/0!	#DIV/0!	#DIV/0!	#DIV/0!	#DIV/0!	#DIV/0!	#DIV/0!	#DIV/0!
ENSMUSG00000080848	-292.584	-8.1927	-1.67029	6.72131e-29	9.52709e-26	9	116040593	116041064	-1	Gm9385	predicted pseudogene 9385 [Source:MGI Symbol;Acc:MGI:3646182]	0	0	0	1.4962	0.0559244	1.4478	0	0.999974	#NUM!	#NUM!	#NUM!	#NUM!	#NUM!	#NUM!	#NUM!	#NUM!	#NUM!
ENSMUSG00000031965	-2.54725	-1.34894	9.60686	1.94529e-25	2.4816e-22	9	24718138	24774303	-1	Tbx20	T-box 20 [Source:MGI Symbol;Acc:MGI:1888496]	319.694	430.255	429.966	1009.77	1274.63	720.915	393.305	1001.77	-1.65926	-1.99531	-1.17314	-1.23076	-1.56681	-0.744638	-1.23173	-1.56778	-0.745607
ENSMUSG00000079297	-2.79064	-1.4806	3.32961	7.71502e-25	8.94732e-22	X	33505661	33507010	1	Gm2223	predicted pseudogene 2223 [Source:MGI Symbol;Acc:MGI:3780393]	6.71298	9.56615	3.41045	12.5136	21.8944	20.0581	6.56319	18.1554	-0.898475	-1.70554	-1.57916	-0.38749	-1.19455	-1.06818	-1.87546	-2.68253	-2.55615
ENSMUSG00000066245	-3.76076	-1.91102	1.22709	3.33053e-24	3.54063e-21	7	107863039	107863500	1	Gm10156	predicted gene 10156 [Source:MGI Symbol;Acc:MGI:3642344]	1.51278	0	1.26958	5.19588	0	6.00235	0.927457	3.73274	-1.78016	#DIV/0!	-1.98832	#NUM!	#DIV/0!	#NUM!	-2.03301	#DIV/0!	-2.24117
ENSMUSG00000048188	-8.61694	-3.10718	-0.86371	3.47427e-20	3.40933e-17	18	43171159	43171827	1	Gm8181	predicted gene 8181 [Source:MGI Symbol;Acc:MGI:3643329]	0.354559	0	0	1.25136	0	2.26219	0.118186	1.17119	-1.8194	#DIV/0!	-2.67362	#NUM!	#DIV/0!	#NUM!	#NUM!	#DIV/0!	#NUM!
ENSMUSG00000069622	2.40112	1.26371	4.16367	4.50776e-20	4.10754e-17	10	59395632	59396757	1	Gm10273	predicted pseudogene 10273 [Source:MGI Symbol;Acc:MGI:3704362]	17.5388	20.8111	34.702	10.7182	8.78013	10.949	24.3507	10.1491	0.710492	0.998239	0.679754	0.957293	1.24504	0.926555	1.69496	1.9827	1.66422
ENSMUSG00000052825	2.66111	1.41203	2.74914	8.29612e-20	7.05558e-17	8	52196065	52197056	-1	Gm9892	predicted gene 9892 [Source:MGI Symbol;Acc:MGI:3701610]	9.26581	7.03207	9.31029	1.60501	7.5498	0.422276	8.53606	3.19236	2.52933	0.295479	4.45566	2.13137	-0.102488	4.05769	2.53624	0.302389	4.46257
ENSMUSG00000065037	-2.18491	-1.12757	4.70734	6.3096e-17	5.03072e-14	9	78175303	78175633	-1	Rn7sk	RNA, 7SK, nuclear [Source:MGI Symbol;Acc:MGI:103186]	18.6498	14.2859	10.5301	42.2743	11.9119	40.9004	14.4886	31.6955	-1.18062	0.646757	-1.13296	-1.56519	0.262186	-1.51753	-2.00526	-0.177886	-1.9576
ENSMUSG00000033910	2.14217	1.09907	4.30936	2.93597e-16	2.20318e-13	3	82092427	82145789	-1	Gucy1a3	guanylate cyclase 1, soluble, alpha 3 [Source:MGI Symbol;Acc:MGI:1926562]	15.8842	40.9887	42.8423	10.6366	27.2911	8.47568	33.2384	15.4678	0.578561	-0.780835	0.906195	1.94619	0.586796	2.27383	2.01	0.650604	2.33763
ENSMUSG00000078886	-2.8262	-1.49886	1.03211	1.33575e-14	9.46675e-12	2	175965331	175980303	1	Gm2026	predicted gene 2026 [Source:MGI Symbol;Acc:MGI:3780195]	0.827304	1.90056	0.970859	0.979328	7.27017	1.87008	1.23291	3.37319	-0.243374	-3.1355	-1.17661	0.95656	-1.93557	0.023325	-0.0125297	-2.90466	-0.945765
ENSMUSG00000043613	1.98439	0.988697	6.0075	2.95927e-14	1.98692e-11	9	7445822	7455975	1	Mmp3	matrix metallopeptidase 3 [Source:MGI Symbol;Acc:MGI:97010]	61.5751	131.994	112.172	46.7357	74.3795	32.7867	101.913	51.3006	0.397821	-0.272558	0.909235	1.49787	0.827494	2.00929	1.26311	0.592731	1.77452
ENSMUSG00000098178	-1.89361	-0.92114	12.8448	6.28369e-13	4.00805e-10	17	39846958	39848788	1	Gm42418	predicted gene, 42418 [Source:MGI Symbol;Acc:MGI:5649005]	4648.43	3805.46	2974.41	11172.3	4698.24	5770.25	3809.43	7213.58	-1.2651	-0.0153752	-0.311889	-1.55378	-0.304049	-0.600563	-1.90924	-0.659514	-0.956028
ENSMUSG00000060989	-1.97061	-0.97864	2.12363	5.1688e-10	3.13992e-07	4	12232833	12233951	1	Gm11847	predicted gene 11847 [Source:MGI Symbol;Acc:MGI:3651787]	3.71105	3.35765	2.78811	3.64528	10.0664	5.73089	3.2856	6.48085	0.0257997	-1.43965	-0.626931	-0.118574	-1.58402	-0.771304	-0.386741	-1.85219	-1.03947
ENSMUSG00000085781	-1.90233	-0.927767	2.78001	8.65455e-10	5.01846e-07	16	45936323	45939279	1	Gm15640	predicted gene 15640 [Source:MGI Symbol;Acc:MGI:3783084]	4.70382	4.71972	3.68429	9.71167	7.77349	7.38983	4.36927	8.29166	-1.04589	-0.724732	-0.651709	-1.04102	-0.719861	-0.646839	-1.39833	-1.07718	-1.00416
ENSMUSG00000079355	2.22341	1.15278	0.786984	1.77715e-09	9.85701e-07	9	104084157	104126933	-1	Ackr4	atypical chemokine receptor 4 [Source:MGI Symbol;Acc:MGI:2181676]	1.65461	3.35765	3.55982	1.65942	1.482	0.633414	2.85736	1.25828	-0.00418622	0.158947	1.38527	1.01678	1.17991	2.40623	1.10113	1.26426	2.49058
ENSMUSG00000037379	1.69202	0.758746	7.5192	3.40311e-09	1.80889e-06	5	33198184	33218455	-1	Spon2	spondin 2, extracellular matrix protein [Source:MGI Symbol;Acc:MGI:1923724]	184.229	312.104	314.882	180.196	167.522	131.599	270.405	159.772	0.0319294	0.137152	0.485347	0.792455	0.897678	1.24587	0.805242	0.910464	1.25866
ENSMUSG00000096544	-1.71403	-0.777392	4.62279	4.52167e-09	2.30732e-06	3	124385667	124385997	1	Gm4617	predicted pseudogene 4617 [Source:MGI Symbol;Acc:MGI:3704225]	22.3372	18.2454	24.9685	67.0023	1.39811	44.0977	21.8504	37.4994	-1.58476	3.9979	-0.981253	-1.87668	3.70598	-1.27317	-1.4241	4.15856	-0.820593
ENSMUSG00000030217	1.96652	0.975648	1.41536	1.55949e-08	7.6517e-06	6	136848451	136857733	-1	Art4	ADP-ribosyltransferase 4 [Source:MGI Symbol;Acc:MGI:1202710]	1.93826	5.41659	4.58046	1.84984	2.5166	1.59862	3.97844	1.98835	0.0673573	-0.376716	0.277935	1.54998	1.10591	1.76056	1.30809	0.864019	1.51867
ENSMUSG00000038296	-1.76367	-0.818581	3.06736	1.66402e-08	7.86219e-06	7	111471661	111779977	-1	Galnt18	UDP-N-acetyl-alpha-D-galactosamine:polypeptide N-acetylgalactosaminyltransferase 18 [Source:MGI Symbol;Acc:MGI:2446239]	8.01303	3.67441	5.2526	11.1807	7.35406	11.6729	5.64668	10.0692	-0.480585	0.123807	-0.542744	-1.60542	-1.00103	-1.66758	-1.0899	-0.48551	-1.15206
ENSMUSG00000032744	1.7376	0.797093	3.07121	2.19735e-08	1.00113e-05	4	123233556	123249875	1	Heyl	hairy/enhancer-of-split related with YRPW motif-like [Source:MGI Symbol;Acc:MGI:1860511]	5.72022	14.6026	16.7535	7.80742	8.30477	5.09747	12.3588	7.06989	-0.448776	-0.537871	0.166288	0.903311	0.814215	1.51837	1.10155	1.01245	1.71661
ENSMUSG00000026971	-2.06317	-1.04486	0.933771	2.36395e-08	1.03989e-05	2	60598292	60722643	-1	Itgb6	integrin beta 6 [Source:MGI Symbol;Acc:MGI:96615]	1.34732	0.823576	1.91682	5.11427	1.70569	1.71927	1.36257	2.84641	-1.92443	-0.340263	-0.351696	-2.63455	-1.05039	-1.06182	-1.41581	0.168359	0.156925
ENSMUSG00000081603	2.92618	1.54902	0.101589	2.88182e-08	1.22544e-05	X	66778442	66778852	-1	Gm14681	predicted gene 14681 [Source:MGI Symbol;Acc:MGI:3705734]	1.48915	1.67883	0	0.46246	0.559244	0	1.05599	0.340568	1.68709	1.41294	#DIV/0!	1.86005	1.5859	#DIV/0!	#NUM!	#NUM!	#DIV/0!
ENSMUSG00000059422	1.7269	0.788184	3.42112	3.65214e-08	1.50291e-05	9	78820638	78821838	-1	Gm8116	predicted gene 8116 [Source:MGI Symbol;Acc:MGI:3648797]	13.946	11.5934	11.1773	12.1056	3.41139	5.70072	12.2389	7.07256	0.204178	2.03142	1.29063	-0.0623668	1.76487	1.02409	-0.115097	1.71214	0.971358
ENSMUSG00000027375	-2.60005	-1.37854	-0.0362293	3.83263e-08	1.5279e-05	2	127633226	127656695	-1	Mal	myelin and lymphocyte protein, T cell differentiation protein [Source:MGI Symbol;Acc:MGI:892970]	0.685481	0.348436	0.423195	1.5234	0.727017	1.65894	0.485704	1.30312	-1.15211	-0.0848739	-1.27507	-2.12833	-1.0611	-2.2513	-1.8479	-0.780667	-1.97087
ENSMUSG00000082319	-1.88417	-0.913932	1.44766	6.87291e-08	2.6569e-05	X	81820384	81822730	-1	Gm8822	predicted gene 8822 [Source:MGI Symbol;Acc:MGI:3648640]	2.19827	1.74218	2.61385	4.92384	0.0838866	7.54064	2.18477	4.18279	-1.16342	4.71178	-1.77832	-1.49889	4.37631	-2.11379	-0.913607	4.96159	-1.52851
ENSMUSG00000049999	2.3973	1.26141	-0.00382989	8.35233e-08	3.13384e-05	2	178411206	178414472	-1	Ppp1r3d	protein phosphatase 1, regulatory subunit 3D [Source:MGI Symbol;Acc:MGI:1917664]	1.32369	1.74218	1.6181	0.38085	0.782942	0.784227	1.56132	0.649339	1.79727	0.757585	0.755219	2.1936	1.15392	1.15155	2.08701	1.04732	1.04496
ENSMUSG00000047067	1.93379	0.951433	1.12597	8.81297e-08	3.2122e-05	1	92906981	92908435	1	Dusp28	dual specificity phosphatase 28 [Source:MGI Symbol;Acc:MGI:1914696]	2.71829	4.05453	3.98301	1.27857	2.96399	1.26683	3.58527	1.83646	1.08817	-0.124846	1.10148	1.66501	0.451991	1.67831	1.63933	0.426317	1.65264
ENSMUSG00000020911	-1.75152	-0.808605	2.64123	1.15007e-07	4.0754e-05	11	100140810	100148665	-1	Krt19	keratin 19 [Source:MGI Symbol;Acc:MGI:96693]	5.79113	2.5024	3.01215	7.23614	5.25689	7.60097	3.76856	6.698	-0.321376	0.139634	-0.392338	-1.53191	-1.0709	-1.60287	-1.26443	-0.803416	-1.33539
ENSMUSG00000082697	-2.54571	-1.34807	-0.0851462	1.26873e-07	4.37437e-05	NA	NA	NA	NA	NA	NA	0.661843	0.47514	0.373407	2.01306	0.167773	1.71927	0.503464	1.30003	-1.60483	1.97998	-1.37723	-2.08297	1.50184	-1.85537	-2.43057	1.15424	-2.20297
ENSMUSG00000083179	-2.1444	-1.10058	0.275384	1.31247e-07	4.40611e-05	4	94935621	94936103	1	Gm12693	predicted gene 12693 [Source:MGI Symbol;Acc:MGI:3650224]	0.992765	0.095028	1.34427	1.36018	2.62845	1.50813	0.810686	1.83225	-0.454271	-1.40469	-0.603235	-3.8393	-4.78971	-3.98826	-0.0169757	-0.967392	-0.16594
ENSMUSG00000047562	1.64363	0.716887	3.63602	1.62947e-07	5.1968e-05	9	7502352	7510240	1	Mmp10	matrix metallopeptidase 10 [Source:MGI Symbol;Acc:MGI:97007]	21.4863	20.0826	18.6953	11.6975	12.6948	12.2762	20.088	12.2228	0.877212	0.759173	0.807555	0.779741	0.661702	0.710085	0.676469	0.55843	0.606813
ENSMUSG00000098650	-1.66874	-0.738757	3.3736	1.61153e-07	5.1968e-05	11	22834744	22982090	-1	Gm28048	predicted gene, 28048 [Source:MGI Symbol;Acc:MGI:5547784]	9.40763	10.9599	5.87494	10.7726	22.6773	10.1346	8.74749	14.5282	-0.195464	-1.26935	-0.107389	0.0248665	-1.04902	0.112942	-0.874721	-1.94861	-0.786646
ENSMUSG00000061535	2.07656	1.05419	0.72272	2.47407e-07	7.69797e-05	5	43515538	43618803	1	C1qtnf7	C1q and tumor necrosis factor related protein 7 [Source:MGI Symbol;Acc:MGI:1925911]	1.30005	2.40738	2.813	0.979328	1.70569	0.392113	2.17348	1.02571	0.408703	-0.391793	1.72922	1.2976	0.497102	2.61812	1.52225	0.721751	2.84277
ENSMUSG00000029838	1.64086	0.714451	3.20516	3.9779e-07	0.000120824	6	36714929	36810220	-1	Ptn	pleiotrophin [Source:MGI Symbol;Acc:MGI:97804]	6.4057	15.6163	18.4712	7.12733	11.4645	5.97219	13.4977	8.18801	-0.154006	-0.839746	0.101096	1.13162	0.445875	1.38672	1.37385	0.688105	1.62895
ENSMUSG00000032315	-1.57844	-0.658501	4.3717	8.2e-07	0.000243273	9	57687928	57703824	1	Cyp1a1	cytochrome P450, family 1, subfamily a, polypeptide 1 [Source:MGI Symbol;Acc:MGI:88588]	25.5519	9.28106	13.5173	27.7476	14.82	34.2345	16.1168	25.6007	-0.118935	0.785887	-0.422022	-1.58	-0.67518	-1.88309	-1.03755	-0.13273	-1.34064
ENSMUSG00000059493	1.57853	0.65858	4.47877	8.70145e-07	0.000246676	X	161833296	162159730	-1	Nhs	NHS actin remodeling regulator [Source:MGI Symbol;Acc:MGI:2684894]	23.0227	30.599	30.022	15.7781	24.6627	12.4571	27.8812	17.6326	0.545137	-0.0992721	0.886084	0.955565	0.311156	1.29651	0.928098	0.283689	1.26905
ENSMUSG00000097154	-2.3394	-1.22614	-0.28294	8.54876e-07	0.000246676	17	70874349	70924996	-1	Gm26510	predicted gene, 26510 [Source:MGI Symbol;Acc:MGI:5477004]	0.472745	0.601844	0.597452	1.08814	0.195735	2.68447	0.557347	1.32278	-1.20273	1.27216	-2.5055	-0.854406	1.62048	-2.15718	-0.864973	1.60992	-2.16774
ENSMUSG00000089704	-1.58807	-0.66727	3.85935	9.51205e-07	0.000263794	8	124231391	124345724	1	Galnt2	UDP-N-acetyl-alpha-D-galactosamine:polypeptide N-acetylgalactosaminyltransferase 2 [Source:MGI Symbol;Acc:MGI:894694]	14.5369	5.73335	13.8161	20.1034	20.9157	13.4827	11.3621	18.1673	-0.46772	-0.524867	0.108616	-1.80999	-1.86714	-1.23365	-0.541094	-0.598241	0.0352418
ENSMUSG00000056427	1.66927	0.73922	2.51827	1.05036e-06	0.000285093	11	35121224	35708507	1	Slit3	slit homolog 3 (Drosophila) [Source:MGI Symbol;Acc:MGI:1315202]	4.6329	8.23576	9.45965	4.5702	5.22893	3.49886	7.44277	4.43266	0.0196605	-0.1746	0.405033	0.849645	0.655385	1.23502	1.04953	0.855271	1.4349
ENSMUSG00000024440	-2.40208	-1.26428	-0.115838	1.18122e-06	0.000313933	18	38267092	38284402	-1	Pcdh12	protocadherin 12 [Source:MGI Symbol;Acc:MGI:1855700]	0.449108	0.506816	0.497876	1.41458	0.782942	1.29699	0.4846	1.16484	-1.65524	-0.801843	-1.53003	-1.48084	-0.627443	-1.35563	-1.50652	-0.653117	-1.38131
ENSMUSG00000085444	-2.02492	-1.01787	0.73883	1.25696e-06	0.000327247	2	110196889	110256131	1	Gm13936	predicted gene 13936 [Source:MGI Symbol;Acc:MGI:3651878]	1.27641	0.855252	0.721921	2.12188	0.922753	2.83528	0.951195	1.95997	-0.733247	0.468078	-1.1514	-1.31092	-0.109595	-1.72907	-1.55543	-0.354103	-1.97358
ENSMUSG00000070476	1.71965	0.782114	2.01233	1.34385e-06	0.000342869	2	178414524	178424428	1	Fam217b	family with sequence similarity 217, member B [Source:MGI Symbol;Acc:MGI:1918782]	4.77473	5.57497	5.40196	3.29163	2.79622	3.04642	5.25055	3.04476	0.536616	0.77194	0.648304	0.760163	0.995487	0.871851	0.714681	0.950005	0.826369
ENSMUSG00000030218	1.54507	0.627671	5.52082	1.53104e-06	0.000382971	6	136872435	136875823	-1	Mgp	matrix Gla protein [Source:MGI Symbol;Acc:MGI:96976]	28.2465	71.8411	61.2388	40.3429	43.621	20.2089	53.7755	34.7243	-0.51424	-0.626951	0.483082	0.832497	0.719786	1.82982	0.602133	0.489422	1.59945
ENSMUSG00000095648	1.84867	0.88649	1.31585	1.62791e-06	0.000399371	2	176141591	176149825	-1	Gm2004	predicted gene 2004 [Source:MGI Symbol;Acc:MGI:3780174]	2.76556	2.69246	2.63875	2.69315	1.59385	0	2.69892	1.429	0.0382762	0.79506	#DIV/0!	-0.000370799	0.756412	#DIV/0!	-0.0294431	0.72734	#DIV/0!
ENSMUSG00000048087	1.63371	0.708151	3.15985	1.8436e-06	0.000443752	16	46152985	46155077	-1	Gm4737	predicted gene 4737 [Source:MGI Symbol;Acc:MGI:3643647]	11.8895	6.4619	9.21071	4.35257	6.03984	6.6056	9.18739	5.666	1.44975	0.977112	0.847931	0.570092	0.0974494	-0.031731	1.08145	0.608804	0.479623
ENSMUSG00000004371	-1.75442	-0.810992	2.55507	1.99406e-06	0.00046286	7	4772373	4782857	-1	Il11	interleukin 11 [Source:MGI Symbol;Acc:MGI:107613]	3.04921	1.80553	1.71767	4.5974	2.43271	4.64503	2.1908	3.89172	-0.592384	0.325869	-0.607255	-1.34839	-0.430142	-1.36327	-1.42036	-0.502109	-1.43523
ENSMUSG00000042436	1.56413	0.645363	3.831	1.99556e-06	0.00046286	11	61485431	61488900	1	Mfap4	microfibrillar-associated protein 4 [Source:MGI Symbol;Acc:MGI:1342276]	7.51665	24.3588	28.0304	12.8129	19.4337	5.85154	19.9686	12.6994	-0.769432	-1.3704	0.361274	0.926851	0.325882	2.05756	1.1294	0.528432	2.26011
ENSMUSG00000081604	1.52206	0.606024	5.76714	3.42599e-06	0.000766761	11	94037218	94037628	-1	Gm11518	predicted gene 11518 [Source:MGI Symbol;Acc:MGI:3650306]	56.0439	64.619	50.634	17.4647	73.5965	21.3853	57.099	37.4822	1.68212	-0.393079	1.38994	1.88752	-0.187679	1.59534	1.53567	-0.53953	1.24349
ENSMUSG00000096054	-1.77567	-0.82836	1.37655	3.39346e-06	0.000766761	10	5020917	5551482	-1	Syne1	spectrin repeat containing, nuclear envelope 1 [Source:MGI Symbol;Acc:MGI:1927152]	2.55282	0.918604	1.51852	2.74756	2.46067	3.92113	1.66332	3.04312	-0.106056	0.0530407	-0.619176	-1.58064	-1.42154	-2.09376	-0.855481	-0.696385	-1.3686
ENSMUSG00000035202	-1.50339	-0.588219	10.3172	3.98243e-06	0.000875929	9	123366927	123462666	1	Lars2	leucyl-tRNA synthetase, mitochondrial [Source:MGI Symbol;Acc:MGI:2142973]	857.087	830.038	836.632	1875.17	823.179	1095.81	841.252	1264.72	-1.12951	0.0582351	-0.354479	-1.17577	0.01197	-0.400744	-1.16436	0.0233858	-0.389328
ENSMUSG00000042804	1.50261	0.587469	6.09398	5.68258e-06	0.00122869	4	152274232	152285337	1	Gpr153	G protein-coupled receptor 153 [Source:MGI Symbol;Acc:MGI:1916157]	68.1226	91.1318	101.766	60.6639	60.5382	52.4527	87.0068	57.8849	0.167295	0.170288	0.377116	0.587116	0.59011	0.796938	0.746345	0.749338	0.956166
ENSMUSG00000082769	-2.17031	-1.1179	-0.00415854	5.83081e-06	0.00123973	1	66849108	66849602	-1	Gm15793	predicted gene 15793 [Source:MGI Symbol;Acc:MGI:3783235]	0.614569	0.411788	0.746815	1.65942	1.28626	0.965202	0.591057	1.30363	-1.43303	-1.06554	-0.651256	-2.0107	-1.64321	-1.22893	-1.15185	-0.784362	-0.370081
ENSMUSG00000005800	2.05473	1.03895	0.204204	6.30562e-06	0.0013187	9	7558456	7568485	1	Mmp8	matrix metallopeptidase 8 [Source:MGI Symbol;Acc:MGI:1202395]	1.2055	1.80553	1.64299	0.952124	0.782942	0.482601	1.55134	0.739222	0.34041	0.622655	1.32073	0.923202	1.20545	1.90352	0.787104	1.06935	1.76742
ENSMUSG00000079575	-1.51375	-0.598125	3.87569	1.11662e-05	0.00229754	6	46529354	46530794	-1	Rbpsuh-rs3	recombining binding protein suppressor of hairless (Drosophila), related sequence 3 [Source:MGI Symbol;Acc:MGI:96525]	14.8915	8.10905	12.5216	21.4364	4.30618	28.383	11.8407	18.0418	-0.525576	1.79001	-0.930539	-1.40246	0.913125	-1.80742	-0.775644	1.53994	-1.18061
ENSMUSG00000091921	1.73729	0.796835	1.06094	1.54346e-05	0.00312538	NA	NA	NA	NA	NA	NA	2.36373	3.42101	3.11173	2.91078	0	2.1717	2.96549	1.69416	-0.300343	#DIV/0!	0.122235	0.233015	#DIV/0!	0.655593	0.0963103	#DIV/0!	0.518888
ENSMUSG00000078497	2.07316	1.05183	-0.0168978	1.81453e-05	0.00361686	4	147361303	147391004	1	Zfp978	zinc finger protein 978 [Source:MGI Symbol;Acc:MGI:3701123]	1.04004	1.10866	1.66789	0.544071	0.810904	0.482601	1.2722	0.612525	0.934772	0.359035	1.10774	1.02695	0.451214	1.19991	1.61615	1.04042	1.78912
ENSMUSG00000024030	1.49832	0.583349	3.81176	1.92539e-05	0.00373788	17	31057698	31115777	1	Abcg1	ATP-binding cassette, sub-family G (WHITE), member 1 [Source:MGI Symbol;Acc:MGI:107704]	12.8823	24.4539	18.521	10.7454	15.7707	10.6172	18.6191	12.3778	0.261672	-0.291854	0.278985	1.18634	0.632817	1.20366	0.785443	0.231917	0.802756
ENSMUSG00000069306	-2.5227	-1.33497	-1.05412	1.93384e-05	0.00373788	13	21811746	21812147	1	Hist1h4m	histone cluster 1, H4m [Source:MGI Symbol;Acc:MGI:2448441]	0.638206	0.285084	0	1.14255	1.20237	0	0.307763	0.781641	-0.840162	-0.913792	#DIV/0!	-2.0028	-2.07643	#DIV/0!	#NUM!	#NUM!	#DIV/0!
ENSMUSG00000045636	1.59034	0.669334	1.90975	2.44234e-05	0.00458191	8	40990914	41133726	-1	Mtus1	mitochondrial tumor suppressor 1 [Source:MGI Symbol;Acc:MGI:2142572]	3.68741	5.98676	6.09899	3.37324	4.16637	2.29235	5.25772	3.27732	0.128474	-0.176182	0.685779	0.827641	0.522985	1.38495	0.854435	0.549779	1.41174
ENSMUSG00000097312	-1.49146	-0.576725	4.17118	2.43429e-05	0.00458191	9	3000282	3038313	-1	Gm26870	predicted gene, 26870 [Source:MGI Symbol;Acc:MGI:5477364]	17.657	8.45749	8.26475	23.5855	7.18629	20.782	11.4598	17.1846	-0.417656	1.29692	-0.235092	-1.4796	0.234983	-1.29703	-1.51286	0.201725	-1.33029
ENSMUSG00000049436	-1.659	-0.730312	1.26499	2.88553e-05	0.00525868	16	38773184	38800203	-1	Upk1b	uroplakin 1B [Source:MGI Symbol;Acc:MGI:98912]	2.7892	1.36207	1.74257	4.40697	2.12513	3.40837	1.96461	3.31349	-0.659939	0.3923	-0.289232	-1.69399	-0.641751	-1.32328	-1.33857	-0.286335	-0.967867
ENSMUSG00000050243	-1.9522	-0.965102	0.132967	2.85348e-05	0.00525868	13	19995021	19995804	-1	Gm5446	predicted gene 5446 [Source:MGI Symbol;Acc:MGI:3644854]	0.992765	0	0.871284	2.77476	0	1.08585	0.62135	1.28687	-1.48284	#DIV/0!	-0.129304	#NUM!	#DIV/0!	#NUM!	-1.67115	#DIV/0!	-0.317613
ENSMUSG00000032076	1.53025	0.613764	2.77506	3.04986e-05	0.00547986	9	47530173	47857637	1	Cadm1	cell adhesion molecule 1 [Source:MGI Symbol;Acc:MGI:1889272]	8.93488	8.39414	9.75838	4.5974	7.66164	5.45942	9.02913	5.90616	0.958631	0.221795	0.7107	0.868564	0.131728	0.620633	1.08582	0.348987	0.837893
ENSMUSG00000059479	2.0957	1.06744	-0.400661	3.65702e-05	0.00639077	7	25626654	25635100	1	B3gnt8	UDP-GlcNAc:betaGal beta-1,3-N-acetylglucosaminyltransferase 8 [Source:MGI Symbol;Acc:MGI:2385269]	0.709118	1.33039	1.29448	0.38085	0.671093	0.512764	1.11133	0.521569	0.896804	0.0795129	0.467732	1.80456	0.987266	1.37549	1.76508	0.947787	1.33601
ENSMUSG00000089945	-1.44467	-0.530742	6.91714	3.64933e-05	0.00639077	4	57568179	57896982	1	Pakap	paralemmin A kinase anchor protein [Source:MGI Symbol;Acc:MGI:5141924]	107.455	101.553	97.1855	170.729	178.958	92.5991	102.065	147.429	-0.66798	-0.735889	0.214663	-0.749476	-0.817386	0.133166	-0.812899	-0.880809	0.0697433
ENSMUSG00000031391	-1.55539	-0.637275	2.40256	4.05126e-05	0.00698404	X	73853778	73896105	-1	L1cam	L1 cell adhesion molecule [Source:MGI Symbol;Acc:MGI:96721]	3.85287	4.18123	3.93322	7.04572	5.11708	6.42463	3.98911	6.19581	-0.870812	-0.409387	-0.737678	-0.752819	-0.291394	-0.619685	-0.841035	-0.379609	-0.7079
ENSMUSG00000026269	1.47704	0.562708	3.67163	4.12757e-05	0.00702073	1	92910783	92924384	1	Rnpepl1	arginyl aminopeptidase (aminopeptidase B)-like 1 [Source:MGI Symbol;Acc:MGI:1914170]	18.3425	17.8969	18.2472	12.7585	10.9612	13.181	18.1622	12.3002	0.523737	0.742788	0.476727	0.488258	0.707309	0.441248	0.516218	0.735269	0.469209
ENSMUSG00000031355	1.45533	0.541349	4.7938	4.22311e-05	0.00708872	X	168795099	169304435	1	Arhgap6	Rho GTPase activating protein 6 [Source:MGI Symbol;Acc:MGI:1196332]	34.6995	38.0112	36.9424	22.3885	30.0034	22.9235	36.551	25.1052	0.632156	0.209787	0.598085	0.763665	0.341296	0.729594	0.72252	0.300151	0.688449
ENSMUSG00000005360	1.46274	0.548672	4.0983	4.74438e-05	0.00786026	15	8634124	8710764	-1	Slc1a3	solute carrier family 1 (glial high affinity glutamate transporter), member 3 [Source:MGI Symbol;Acc:MGI:99917]	15.0333	26.2277	25.79	15.8053	18.2034	11.7031	22.3503	15.2372	-0.0722433	-0.276046	0.361274	0.730687	0.526885	1.1642	0.706407	0.502604	1.13992
ENSMUSG00000081309	-1.75835	-0.814226	0.736636	4.90245e-05	0.00801802	4	40912741	40913355	-1	Gm12397	predicted gene 12397 [Source:MGI Symbol;Acc:MGI:3649202]	0.921853	1.01363	1.56831	2.12188	0.950715	3.16707	1.16793	2.07989	-1.20273	-0.0444758	-1.78054	-1.06581	0.0924487	-1.64361	-0.436129	0.722127	-1.01394
ENSMUSG00000031936	-1.97488	-0.981766	0.247209	5.53502e-05	0.008938	9	15051841	15112108	-1	Hephl1	hephaestin-like 1 [Source:MGI Symbol;Acc:MGI:2685355]	0.756392	0.7919	0.52277	2.01306	1.11849	0.904877	0.690354	1.34548	-1.41219	-0.564343	-0.258587	-1.346	-0.49816	-0.192404	-1.94514	-1.0973	-0.791544
ENSMUSG00000096252	1.74283	0.801428	0.982136	5.64067e-05	0.00899475	13	49493615	49494819	1	Tes3-ps	testis derived transcript 3, pseudogene [Source:MGI Symbol;Acc:MGI:3582925]	2.26918	1.23536	2.68853	3.50926	0	0	2.06436	1.16975	-0.628997	#DIV/0!	#DIV/0!	-1.50623	#DIV/0!	#DIV/0!	-0.384347	#DIV/0!	#DIV/0!
ENSMUSG00000078881	-1.4834	-0.568907	3.28257	5.90904e-05	0.00930637	2	176473278	176486783	-1	Gm14434	predicted gene 14434 [Source:MGI Symbol;Acc:MGI:3702417]	8.93488	7.03207	8.14028	6.20241	19.8252	9.833	8.03574	11.9535	0.526621	-1.14981	-0.138182	0.181121	-1.49531	-0.483682	0.39225	-1.28419	-0.272552
ENSMUSG00000082806	-1.77036	-0.824043	0.46398	6.71055e-05	0.0104398	11	85111126	85111793	-1	Rpl13-ps1	ribosomal protein L13, pseudogene 1 [Source:MGI Symbol;Acc:MGI:3649805]	0.992765	1.01363	1.26958	2.17628	0.643131	3.04642	1.09199	1.95528	-1.13234	0.62634	-1.61759	-1.10233	0.65635	-1.58758	-0.77751	0.981173	-1.26276
ENSMUSG00000004231	2.00391	1.00282	-0.147358	6.80934e-05	0.0104659	19	44756045	44837871	1	Pax2	paired box 2 [Source:MGI Symbol;Acc:MGI:97486]	1.11095	1.52045	0.84639	0.598478	0.671093	0.422276	1.15926	0.563949	0.892425	0.727211	1.39554	1.34513	1.17991	1.84824	0.500024	0.33481	1.00314
ENSMUSG00000028864	1.44449	0.53056	5.07684	6.96349e-05	0.0105754	5	16553495	16620152	1	Hgf	hepatocyte growth factor [Source:MGI Symbol;Acc:MGI:96079]	26.1901	30.3139	30.2709	19.4777	22.4257	18.1277	28.925	20.0104	0.427194	0.223869	0.530825	0.638154	0.434828	0.741785	0.636105	0.432779	0.739735
ENSMUSG00000096764	-1.54505	-0.627653	2.12435	7.10219e-05	0.0106591	2	112266314	112406319	1	Gm21985	predicted gene 21985 [Source:MGI Symbol;Acc:MGI:5439454]	3.02557	3.80112	4.25684	8.02505	3.9986	5.03715	3.69451	5.68693	-1.4073	-0.402287	-0.7354	-1.07809	-0.0730692	-0.406183	-0.914726	0.0902909	-0.242823
ENSMUSG00000037362	1.47952	0.565125	3.01471	7.37141e-05	0.0109345	15	54745702	54754039	1	Nov	nephroblastoma overexpressed gene [Source:MGI Symbol;Acc:MGI:109185]	8.67487	12.2269	11.9739	7.26335	9.67492	5.18796	10.9586	7.37541	0.256208	-0.157407	0.741675	0.751356	0.33774	1.23682	0.72119	0.307575	1.20666
ENSMUSG00000027913	-1.65463	-0.726505	1.07833	8.18337e-05	0.0119995	3	93014205	93015687	-1	Crct1	cysteine-rich C-terminal 1 [Source:MGI Symbol;Acc:MGI:1921425]	2.19827	1.23536	1.36916	2.99239	1.39811	3.71	1.60093	2.70017	-0.444933	0.652887	-0.755052	-1.27636	-0.178542	-1.58648	-1.12801	-0.0301867	-1.43813
ENSMUSG00000031075	-1.54272	-0.625477	1.97493	9.05019e-05	0.0131197	7	144588549	144751974	-1	Ano1	anoctamin 1, calcium activated chloride channel [Source:MGI Symbol;Acc:MGI:2142149]	3.87651	2.5024	3.08683	4.51579	4.30618	5.94202	3.15525	4.92133	-0.220219	-0.15165	-0.616196	-0.851664	-0.783094	-1.24764	-0.54885	-0.480281	-0.944827
ENSMUSG00000070509	1.44175	0.527817	3.93568	0.000105845	0.0151715	7	73375509	73419899	1	Rgma	repulsive guidance molecule family member A [Source:MGI Symbol;Acc:MGI:2679262]	15.9788	21.7614	20.7117	13.6018	14.2048	12.6683	19.484	13.4916	0.232363	0.16978	0.334938	0.677977	0.615393	0.780551	0.606648	0.544065	0.709223
ENSMUSG00000025328	-1.91705	-0.938888	-0.328133	0.000117627	0.016673	4	140785365	140810648	-1	Padi3	peptidyl arginine deiminase, type III [Source:MGI Symbol;Acc:MGI:1338891]	0.827304	0.380112	0.572558	1.65942	0.671093	1.17634	0.593325	1.16895	-1.00419	0.301905	-0.507815	-2.12618	-0.820088	-1.62981	-1.53518	-0.229091	-1.03881
ENSMUSG00000005124	1.40287	0.488383	8.32342	0.000130429	0.0181337	15	66891320	66923201	1	Wisp1	WNT1 inducible signaling pathway protein 1 [Source:MGI Symbol;Acc:MGI:1197008]	407.435	451.763	446.819	290.044	359.734	281.145	435.339	310.308	0.490299	0.179642	0.535256	0.639293	0.328636	0.68425	0.623418	0.312762	0.668376
ENSMUSG00000058492	-2.16707	-1.11574	-0.265456	0.000130775	0.0181337	9	123306600	123317998	-1	Scp2-ps2	sterol carrier protein 2, pseudogene 2 [Source:MGI Symbol;Acc:MGI:107679]	0	1.90056	0	0	2.48864	1.08585	0.63352	1.1915	#DIV/0!	#NUM!	#NUM!	#DIV/0!	-0.388931	0.807596	#DIV/0!	#NUM!	#NUM!
ENSMUSG00000025650	-1.43037	-0.516388	4.22118	0.000137164	0.0188151	9	108953586	108984875	1	Col7a1	collagen, type VII, alpha 1 [Source:MGI Symbol;Acc:MGI:88462]	15.0569	14.1908	15.1354	22.2797	17.2806	23.9792	14.7944	21.1799	-0.565302	-0.198729	-0.671358	-0.65077	-0.284197	-0.756825	-0.557799	-0.191226	-0.663855
ENSMUSG00000022032	1.9774	0.983605	-0.318903	0.000141321	0.0191791	14	65666403	65764826	1	Scara5	scavenger receptor class A, member 5 [Source:MGI Symbol;Acc:MGI:1918395]	0.496382	1.23536	1.51852	0.598478	0.643131	0.361951	1.08342	0.53452	-0.269846	-0.37366	0.455659	1.04557	0.941752	1.77107	1.3433	1.23949	2.0688
ENSMUSG00000026475	-1.42018	-0.50607	4.68763	0.000143225	0.0192328	1	153740349	153745468	1	Rgs16	regulator of G-protein signaling 16 [Source:MGI Symbol;Acc:MGI:108407]	26.781	14.2859	16.1063	25.1089	28.4096	27.9305	19.0577	27.1497	0.0930134	-0.0851677	-0.0606323	-0.813608	-0.991789	-0.967254	-0.640572	-0.818753	-0.794218
ENSMUSG00000080316	-1.42131	-0.507217	4.47053	0.000154892	0.0205829	17	17830719	17843009	1	Spaca6	sperm acrosome associated 6 [Source:MGI Symbol;Acc:MGI:1922452]	19.9498	14.2542	16.1312	22.1981	16.9731	32.5756	16.7784	23.9156	-0.154058	0.233131	-0.707412	-0.639049	-0.25186	-1.1924	-0.460582	-0.073393	-1.01394
ENSMUSG00000094248	-1.79158	-0.841232	-0.0988388	0.000158939	0.0206897	13	21810465	21810944	1	Hist1h2ao	histone cluster 1, H2ao [Source:MGI Symbol;Acc:MGI:2448302]	1.0164	0.190056	0.921071	0.979328	1.73366	1.29699	0.709177	1.33666	0.0536079	-0.770347	-0.351696	-2.36537	-3.18932	-2.77067	-0.0884786	-0.912433	-0.493783
ENSMUSG00000098001	-1.54672	-0.629211	1.548	0.000157678	0.0206897	8	80933534	80938667	-1	Gm27048	predicted gene, 27048 [Source:MGI Symbol;Acc:MGI:5504163]	2.86011	1.67883	2.66364	3.64528	0.894791	6.8469	2.40086	3.79566	-0.349958	1.67645	-1.25938	-1.11857	0.907832	-2.028	-0.452629	1.57378	-1.36205
ENSMUSG00000056457	-1.44699	-0.533051	3.4071	0.000163241	0.021035	13	12790816	12800079	-1	Prl2c3	prolactin family 2, subfamily c, member 3 [Source:MGI Symbol;Acc:MGI:1341833]	9.76219	6.11347	7.44325	10.9902	8.19293	14.7797	7.77297	11.3209	-0.170945	0.252826	-0.598336	-0.84616	-0.422388	-1.27355	-0.562217	-0.138445	-0.989607
ENSMUSG00000016262	1.40943	0.495107	4.76239	0.000175229	0.0221326	1	192844488	192855756	-1	Sertad4	SERTA domain containing 4 [Source:MGI Symbol;Acc:MGI:2443496]	27.7974	40.7353	40.6018	24.1295	32.1845	21.0233	36.3782	25.7791	0.20415	-0.211415	0.402961	0.75548	0.339914	0.954291	0.750744	0.335179	0.949555
ENSMUSG00000049891	-1.62478	-0.700243	1.08441	0.000174846	0.0221326	8	75398511	75399048	1	Gm7984	predicted gene 7984 [Source:MGI Symbol;Acc:MGI:3645839]	1.91462	2.62911	1.02065	1.76823	3.9986	3.13691	1.85479	2.96791	0.11475	-1.06244	-0.712286	0.572267	-0.60492	-0.25477	-0.792823	-1.97001	-1.61986
ENSMUSG00000038156	1.68647	0.754005	0.595589	0.000182963	0.0228829	7	113765998	114043370	1	Spon1	spondin 1, (f-spondin) extracellular matrix protein [Source:MGI Symbol;Acc:MGI:2385287]	0.685481	2.78749	2.38981	1.22416	1.84551	0.271463	1.95426	1.11371	-0.836604	-1.42883	1.33636	1.18717	0.594949	3.36014	0.965102	0.372878	3.13807
ENSMUSG00000001021	-1.45069	-0.536734	2.85753	0.000199451	0.0247028	3	90560578	90602702	1	S100a3	S100 calcium binding protein A3 [Source:MGI Symbol;Acc:MGI:1338849]	8.03667	4.27626	6.17367	9.05878	6.26353	11.7634	6.1622	9.02857	-0.172719	0.359621	-0.549635	-1.08297	-0.550628	-1.45988	-0.553189	-0.0208489	-0.930105
ENSMUSG00000046623	-1.44884	-0.534895	2.9412	0.000218354	0.0267841	4	127351086	127354081	-1	Gjb4	gap junction protein, beta 4 [Source:MGI Symbol;Acc:MGI:95722]	7.54029	5.60665	6.29814	10.4462	7.46591	10.3759	6.48169	9.42933	-0.470282	0.0143015	-0.460548	-0.897762	-0.413179	-0.888029	-0.729976	-0.245393	-0.720242
ENSMUSG00000031380	1.39057	0.475681	6.34654	0.000225965	0.0274537	X	164373378	164402650	1	Vegfd	vascular endothelial growth factor D [Source:MGI Symbol;Acc:MGI:108037]	84.7159	109.504	106.371	71.5725	77.2036	67.3228	100.197	72.033	0.243227	0.133965	0.331538	0.613504	0.504241	0.701814	0.571631	0.462368	0.659941
ENSMUSG00000066755	1.44317	0.529246	2.79002	0.000244867	0.0294696	1	161494655	161505290	1	Tnfsf18	tumor necrosis factor (ligand) superfamily, member 18 [Source:MGI Symbol;Acc:MGI:2673064]	11.4404	9.66118	9.21071	6.9097	8.91994	5.1578	10.1041	6.99581	0.727447	0.359035	1.14931	0.483576	0.115164	0.905444	0.41469	0.0462786	0.836558
ENSMUSG00000053414	1.57103	0.65171	1.23081	0.000311264	0.0371102	16	90386397	90499553	1	Hunk	hormonally upregulated Neu-associated kinase [Source:MGI Symbol;Acc:MGI:1347352]	3.30922	3.23095	2.51428	1.95866	1.39811	2.413	3.01815	1.92326	0.756626	1.24301	0.455659	0.722095	1.20848	0.421128	0.36028	0.846665	0.0593122
ENSMUSG00000031377	1.47272	0.558485	2.08955	0.000323767	0.0375482	X	164192842	164258193	-1	Bmx	BMX non-receptor tyrosine kinase [Source:MGI Symbol;Acc:MGI:1101778]	4.75109	6.96872	5.75047	4.67901	3.83082	3.25756	5.82343	3.92246	0.022055	0.310604	0.544468	0.57469	0.863239	1.0971	0.297477	0.586027	0.81989
ENSMUSG00000051379	-1.52094	-0.604967	1.65873	0.000321754	0.0375482	2	140650914	140671469	-1	Flrt3	fibronectin leucine rich transmembrane protein 3 [Source:MGI Symbol;Acc:MGI:1918686]	2.6001	2.78749	2.51428	3.42765	4.44599	4.13227	2.63395	4.00197	-0.398652	-0.773938	-0.668368	-0.298253	-0.67354	-0.56797	-0.447075	-0.822362	-0.716792
ENSMUSG00000064023	-1.41248	-0.498232	3.4825	0.000321835	0.0375482	7	43797577	43803826	1	Klk8	kallikrein related-peptidase 8 [Source:MGI Symbol;Acc:MGI:1343327]	13.3078	7.50721	8.16517	13.5746	8.55643	19.0627	9.66005	13.7312	-0.0286368	0.637188	-0.518486	-0.854558	-0.188733	-1.34441	-0.733351	-0.0675261	-1.2232
ENSMUSG00000022053	1.38341	0.468227	5.28453	0.000345038	0.0390968	14	67233292	67430918	1	Ebf2	early B cell factor 2 [Source:MGI Symbol;Acc:MGI:894332]	39.8288	50.3015	53.92	29.3526	45.9139	28.8052	48.0168	34.6906	0.440322	-0.205121	0.46748	0.777111	0.131668	0.804269	0.877331	0.231889	0.904489
ENSMUSG00000033852	-1.56545	-0.646582	1.199	0.000344211	0.0390968	2	120027493	120043033	1	Gm28042	predicted gene, 28042 [Source:MGI Symbol;Acc:MGI:5547778]	3.09648	1.83721	0.547664	2.36671	1.90143	4.4339	1.82712	2.90068	0.387748	0.703545	-0.517945	-0.365368	-0.0495703	-1.27106	-2.11152	-1.79572	-3.01721
ENSMUSG00000097956	-1.64018	-0.713858	0.479604	0.000346315	0.0390968	NA	NA	NA	NA	NA	NA	1.53642	0.95028	1.04554	1.74103	0.50332	3.71	1.17741	1.98478	-0.180364	1.61003	-1.27184	-0.873515	0.916877	-1.96499	-0.73569	1.0547	-1.82717
ENSMUSG00000005125	1.38415	0.468999	4.87742	0.000376903	0.0418101	15	66929321	66969640	-1	Ndrg1	N-myc downstream regulated gene 1 [Source:MGI Symbol;Acc:MGI:1341799]	34.6759	38.2646	40.5023	28.5637	25.3617	28.021	37.8142	27.3155	0.279748	0.451279	0.307422	0.421826	0.593358	0.449501	0.503818	0.67535	0.531493
ENSMUSG00000067780	-1.3877	-0.4727	4.73039	0.000374803	0.0418101	1	17601901	17630939	1	Pi15	peptidase inhibitor 15 [Source:MGI Symbol;Acc:MGI:1934659]	24.89	19.1006	20.3383	24.9457	40.1258	24.2809	21.443	29.7841	-0.0032201	-0.688961	0.0357487	-0.385169	-1.07091	-0.3462	-0.294593	-0.980333	-0.255624
ENSMUSG00000075391	1.4613	0.547254	2.43279	0.000380223	0.0418147	2	35340409	35340963	1	Gm13443	predicted gene 13443 [Source:MGI Symbol;Acc:MGI:3649615]	7.58756	6.20849	6.32303	3.99892	3.74694	6.09284	6.70636	4.6129	0.924025	1.01793	0.316522	0.634632	0.728532	0.0271291	0.661005	0.754905	0.0535021
ENSMUSG00000028776	-1.37275	-0.457072	6.39186	0.000389345	0.0424519	4	130164454	130175122	-1	Tinagl1	tubulointerstitial nephritis antigen-like 1 [Source:MGI Symbol;Acc:MGI:2137617]	90.058	63.6371	66.118	111.888	72.0586	117.966	73.271	100.638	-0.313132	0.321683	-0.389443	-0.814119	-0.179303	-0.890429	-0.758943	-0.124128	-0.835254
ENSMUSG00000032487	-1.36814	-0.452217	8.42376	0.000398465	0.0430277	1	150100031	150108227	1	Ptgs2	prostaglandin-endoperoxide synthase 2 [Source:MGI Symbol;Acc:MGI:97798]	328.227	131.36	182.024	262.025	301.964	314.234	213.87	292.741	0.324992	0.120318	0.0628567	-0.996172	-1.20085	-1.25831	-0.525576	-0.73025	-0.787712
ENSMUSG00000073910	1.68055	0.748936	0.5144	0.000404406	0.0430277	4	34949074	35157484	-1	Mob3b	MOB kinase activator 3B [Source:MGI Symbol;Acc:MGI:2664539]	1.5837	1.86888	1.86704	1.08814	1.0346	1.02553	1.77321	1.04942	0.541429	0.614221	0.62693	0.78031	0.853101	0.865811	0.778884	0.851675	0.864385
ENSMUSG00000097839	-1.52024	-0.604295	1.40792	0.000404745	0.0430277	8	22644861	22646286	1	Gm26909	predicted gene, 26909 [Source:MGI Symbol;Acc:MGI:5477403]	2.93102	1.67883	1.96661	3.69968	1.11849	5.36894	2.19215	3.3957	-0.335998	1.38985	-0.873233	-1.13995	0.585904	-1.67718	-0.911689	0.814162	-1.44892
ENSMUSG00000000440	1.47644	0.562122	2.00021	0.000419721	0.0442511	6	115360951	115490399	1	Pparg	peroxisome proliferator activated receptor gamma [Source:MGI Symbol;Acc:MGI:97747]	4.65654	5.82838	4.87919	3.75409	3.69101	2.89561	5.12137	3.4469	0.310795	0.335242	0.685393	0.634632	0.659079	1.00923	0.378178	0.402625	0.752776
ENSMUSG00000027339	-1.56773	-0.648682	1.34137	0.000442352	0.0462548	2	131989415	132030258	-1	Rassf2	Ras association (RalGDS/AF-6) domain family member 2 [Source:MGI Symbol;Acc:MGI:2442060]	1.82007	1.74218	1.69278	2.99239	1.98532	3.28772	1.75168	2.75514	-0.717305	-0.125376	-0.853094	-0.780405	-0.188476	-0.916194	-0.821904	-0.229975	-0.957693
ENSMUSG00000027692	1.54415	0.626811	1.1996	0.000485245	0.0499215	3	28263214	28675858	1	Tnik	TRAF2 and NCK interacting kinase [Source:MGI Symbol;Acc:MGI:1916264]	3.02557	3.13592	2.91258	2.01306	2.20901	1.62878	3.02469	1.95029	0.587815	0.453804	0.893416	0.639498	0.505487	0.9451	0.532904	0.398894	0.838506
ENSMUSG00000096944	1.78058	0.832345	-0.0250559	0.000483784	0.0499215	4	129309081	129318443	1	Gm26722	predicted gene, 26722 [Source:MGI Symbol;Acc:MGI:5477216]	1.0164	1.20369	1.51852	0.788903	0.950715	0.331788	1.2462	0.690469	0.365552	0.0963867	1.61514	0.609541	0.340376	1.85913	0.944749	0.675584	2.19433
ENSMUSG00000023031	-1.64811	-0.720814	0.674891	0.0005029	0.051324	15	100674425	100687920	-1	Cela1	chymotrypsin-like elastase family, member 1 [Source:MGI Symbol;Acc:MGI:95314]	1.13459	1.14034	1.1949	2.52993	1.23034	1.96057	1.15661	1.90694	-1.15693	-0.116884	-0.789101	-1.14964	-0.109595	-0.781812	-1.0822	-0.0421594	-0.714376
ENSMUSG00000028229	1.51732	0.601522	1.68677	0.000517628	0.0524078	4	19575162	19606932	1	Rmdn1	regulator of microtubule dynamics 1 [Source:MGI Symbol;Acc:MGI:1913552]	3.21467	3.48436	3.70918	2.33951	2.71233	1.77959	3.4694	2.27714	0.458466	0.245135	0.853124	0.57469	0.361358	0.969347	0.664897	0.451565	1.05955
ENSMUSG00000086061	-1.38739	-0.472377	3.98115	0.000523754	0.0526105	4	141398829	141411191	1	Gm13075	predicted gene 13075 [Source:MGI Symbol;Acc:MGI:3651958]	14.4896	15.1411	12.3722	22.2253	6.85074	29.2275	14.001	19.4345	-0.617181	1.08069	-1.01231	-0.553731	1.14414	-0.948855	-0.845097	0.852774	-1.24022
ENSMUSG00000031845	-1.51651	-0.600753	1.27275	0.000563163	0.0561272	8	117095854	117133720	1	Bco1	beta-carotene oxygenase 1 [Source:MGI Symbol;Acc:MGI:1926923]	2.411	1.90056	2.11597	4.21655	2.26494	3.31788	2.14251	3.26646	-0.806431	0.0901601	-0.46063	-1.14964	-0.253048	-0.803838	-0.99474	-0.0981493	-0.64894
ENSMUSG00000021390	1.36063	0.44428	5.88105	0.000584262	0.0577786	13	49608046	49624501	1	Ogn	osteoglycin [Source:MGI Symbol;Acc:MGI:109278]	51.5056	97.7838	85.585	47.0621	98.7066	26.6335	78.2914	57.4674	0.130162	-0.938417	0.951485	1.05503	-0.0135511	1.87635	0.862791	-0.205789	1.68411
ENSMUSG00000037913	-1.6183	-0.694482	0.700505	0.000591514	0.0580457	5	65054346	65092132	-1	Tmem156	transmembrane protein 156 [Source:MGI Symbol;Acc:MGI:2685292]	1.72552	0.918604	0.871284	1.5234	1.67773	2.62414	1.1718	1.94176	0.179738	0.0405188	-0.604815	-0.729779	-0.868998	-1.51433	-0.806079	-0.945298	-1.59063
ENSMUSG00000089951	1.57201	0.652614	1.01354	0.000599159	0.0583471	2	176423594	176435761	1	Gm14435	predicted gene 14435 [Source:MGI Symbol;Acc:MGI:3702420]	1.72552	2.56576	3.06194	0.870514	2.57252	1.2065	2.45107	1.54985	0.987093	-0.576153	0.5162	1.55944	-0.00380038	1.08855	1.81451	0.251262	1.34362
ENSMUSG00000027221	-1.43682	-0.52288	2.63239	0.000606376	0.0585023	2	92599707	92615250	1	Chst1	carbohydrate (keratan sulfate Gal-6) sulfotransferase 1 [Source:MGI Symbol;Acc:MGI:1924219]	5.29475	3.86447	4.00791	6.61046	4.5858	7.84227	4.38904	6.34618	-0.320189	0.207388	-0.566709	-0.77448	-0.246903	-1.021	-0.721903	-0.194325	-0.968422
ENSMUSG00000075590	1.43776	0.523824	2.39962	0.000609925	0.0585023	15	76085595	76090013	-1	Nrbp2	nuclear receptor binding protein 2 [Source:MGI Symbol;Acc:MGI:2385017]	5.60203	7.38051	6.67154	4.32536	4.3621	4.94666	6.55136	4.54471	0.373128	0.360926	0.179495	0.770898	0.758696	0.577265	0.625199	0.612997	0.431566
ENSMUSG00000060096	-1.60175	-0.679651	0.700374	0.000622944	0.0593052	18	64448519	64450014	-1	Amd-ps3	S-adenosylmethionine decarboxylase, pseudogene 3 [Source:MGI Symbol;Acc:MGI:3704487]	1.27641	0.47514	1.51852	1.03373	1.482	2.95593	1.09003	1.82389	0.304228	-0.215448	-1.21152	-1.12144	-1.64112	-2.63719	0.554803	0.0351266	-0.960944
ENSMUSG00000032845	-1.37697	-0.461495	4.1475	0.00063391	0.059509	18	65265529	65393888	-1	Alpk2	alpha-kinase 2 [Source:MGI Symbol;Acc:MGI:2449492]	17.4207	15.6796	13.9654	25.6801	9.33938	29.8609	15.6886	21.6268	-0.559854	0.899401	-0.77746	-0.711763	0.747492	-0.929369	-0.878793	0.580462	-1.0964
ENSMUSG00000085840	-1.44536	-0.53143	2.28907	0.000634415	0.059509	4	78659858	78661588	-1	Gm11261	predicted gene 11261 [Source:MGI Symbol;Acc:MGI:3650239]	4.53835	3.64274	3.46024	4.81503	4.25026	7.87243	3.88044	5.6459	-0.0853749	0.0946198	-0.79464	-0.402521	-0.222526	-1.11179	-0.476671	-0.296677	-1.18594
ENSMUSG00000026068	-1.42847	-0.514475	2.70644	0.000684129	0.0637039	1	40515362	40551705	1	Il18rap	interleukin 18 receptor accessory protein [Source:MGI Symbol;Acc:MGI:1338888]	5.50748	3.2943	4.35642	6.17521	5.0332	7.78194	4.38607	6.33011	-0.165094	0.129918	-0.498737	-0.906514	-0.611502	-1.24016	-0.503344	-0.208332	-0.836987
ENSMUSG00000046447	1.39834	0.483712	3.07384	0.000723373	0.0668701	4	138454314	138460123	1	Camk2n1	calcium/calmodulin-dependent protein kinase II inhibitor 1 [Source:MGI Symbol;Acc:MGI:1913509]	8.4385	11.9735	10.9284	7.6714	9.05975	5.58007	10.4468	7.43708	0.137497	-0.102485	0.596703	0.642286	0.402304	1.10149	0.510519	0.270537	0.969725
ENSMUSG00000058174	-1.39704	-0.482377	3.00199	0.000754026	0.0692022	3	37714190	37724490	-1	Gm5148	predicted gene 5148 [Source:MGI Symbol;Acc:MGI:3646006]	7.98939	7.47553	7.36857	12.4592	3.69101	15.8353	7.61117	10.6619	-0.641056	1.11407	-0.98699	-0.736966	1.01816	-1.0829	-0.757757	0.997369	-1.10369
ENSMUSG00000048120	-1.47301	-0.558771	1.66601	0.000808089	0.0736342	19	40612366	40741602	1	Entpd1	ectonucleoside triphosphate diphosphohydrolase 1 [Source:MGI Symbol;Acc:MGI:102805]	3.26194	2.15397	2.36491	3.75409	3.18769	4.64503	2.59361	3.86227	-0.202732	0.0332192	-0.509958	-0.801467	-0.565516	-1.10869	-0.666676	-0.430725	-0.973902
ENSMUSG00000028005	1.34413	0.426676	7.46129	0.000851294	0.077021	3	82032006	82074689	-1	Gucy1b3	guanylate cyclase 1, soluble, beta 3 [Source:MGI Symbol;Acc:MGI:1860604]	198.837	252.236	246.001	156.774	215.197	146.56	232.358	172.844	0.342897	-0.114075	0.440093	0.686087	0.229115	0.783283	0.649976	0.193004	0.747172
ENSMUSG00000022687	1.35719	0.440627	4.71295	0.000865758	0.077778	16	44485049	44558897	-1	Boc	biregional cell adhesion molecule-related/down-regulated by oncogenes (Cdon) binding protein [Source:MGI Symbol;Acc:MGI:2151153]	24.1573	36.8392	37.3656	25.6801	25.6134	21.0836	32.7874	24.1257	-0.0881955	-0.0844395	0.196335	0.520587	0.524343	0.805117	0.541058	0.544814	0.825588
ENSMUSG00000057359	-1.69502	-0.761303	0.152891	0.000892314	0.0796031	3	122255958	122293720	-1	Gm17494	predicted gene, 17494 [Source:MGI Symbol;Acc:MGI:4937128]	0.756392	0.886928	0.821496	1.63221	0.419433	2.14154	0.821605	1.39773	-1.10962	0.850694	-1.50144	-0.879941	1.08038	-1.27176	-0.990503	0.969813	-1.38232
ENSMUSG00000048142	-1.85486	-0.891313	-0.544852	0.000942766	0.0835199	5	33995984	34005916	1	Nat8l	N-acetyltransferase 8-like [Source:MGI Symbol;Acc:MGI:2447776]	0.661843	0.443464	0.448089	1.00653	0.75498	1.17634	0.517799	0.979284	-0.60483	-0.189948	-0.829743	-1.1825	-0.767621	-1.40742	-1.16754	-0.752653	-1.39245
ENSMUSG00000032243	1.39202	0.477179	2.93561	0.00105368	0.09182	9	62677826	62783982	1	Itga11	integrin alpha 11 [Source:MGI Symbol;Acc:MGI:2442114]	5.88568	11.1816	8.63816	6.50165	6.54316	5.27845	8.56849	6.10775	-0.143597	-0.152778	0.157095	0.782252	0.773071	1.08294	0.409918	0.400737	0.71061
ENSMUSG00000046580	-1.44013	-0.5262	1.92389	0.00105497	0.09182	12	76152336	76152627	-1	Gm7862	predicted gene 7862 [Source:MGI Symbol;Acc:MGI:3648002]	3.33285	3.10425	3.68429	4.89664	3.74694	6.00235	3.3738	4.88197	-0.555034	-0.168953	-0.848769	-0.657548	-0.271468	-0.951284	-0.410407	-0.0243261	-0.704142
ENSMUSG00000064357	1.33523	0.417094	9.58119	0.00105805	0.09182	MT	7927	8607	1	mt-Atp6	mitochondrially encoded ATP synthase 6 [Source:MGI Symbol;Acc:MGI:99927]	923.508	911.508	705.242	574.729	841.886	485.798	846.753	634.138	0.684241	0.133499	0.926767	0.665373	0.114631	0.907899	0.295236	-0.255507	0.537761
ENSMUSG00000096948	-1.56898	-0.649831	0.913189	0.00106688	0.0919611	18	54990310	55079414	1	Gm4221	predicted gene 4221 [Source:MGI Symbol;Acc:MGI:3782397]	1.70188	0.918604	1.02065	1.93145	1.20237	2.71463	1.21371	1.94949	-0.182554	0.501245	-0.673624	-1.07217	-0.388372	-1.56324	-0.920202	-0.236403	-1.41127
ENSMUSG00000091881	-1.65749	-0.729002	0.461837	0.00108246	0.0926773	3	88722090	88722670	1	Gm17146	predicted gene 17146 [Source:MGI Symbol;Acc:MGI:4937973]	0.992765	0.886928	0.796602	1.25136	1.0346	2.20187	0.892098	1.49594	-0.333976	-0.0595511	-1.1492	-0.496612	-0.222187	-1.31184	-0.651569	-0.377144	-1.4668
ENSMUSG00000097346	-1.45153	-0.537576	1.57003	0.00112144	0.0953749	13	97751112	97760965	1	Gm26619	predicted gene, 26619 [Source:MGI Symbol;Acc:MGI:5477113]	3.21467	2.72414	2.51428	4.29816	1.17441	6.90723	2.81769	4.1266	-0.41905	1.45273	-1.10344	-0.657921	1.21386	-1.34231	-0.773576	1.0982	-1.45796
ENSMUSG00000042115	-1.38832	-0.473339	3.04733	0.00114959	0.0971217	1	132298626	132307357	1	Klhdc8a	kelch domain containing 8A [Source:MGI Symbol;Acc:MGI:2442630]	7.54029	4.78307	5.60111	9.30361	6.15168	9.59169	5.97482	8.349	-0.303172	0.293638	-0.347166	-0.959853	-0.363043	-1.00385	-0.732078	-0.135269	-0.776073
ENSMUSG00000023034	-1.34926	-0.432169	4.62848	0.00122014	0.102404	15	101266846	101274792	1	Nr4a1	nuclear receptor subfamily 4, group A, member 1 [Source:MGI Symbol;Acc:MGI:1352454]	23.4009	12.0369	16.0316	19.6138	26.0328	24.0697	17.1565	23.2388	0.254697	-0.153768	-0.0406563	-0.704405	-1.11287	-0.999759	-0.290946	-0.699411	-0.586299
ENSMUSG00000085667	-1.64016	-0.71384	0.189586	0.00125027	0.104247	4	131899478	131920029	-1	Gm12992	predicted gene 12992 [Source:MGI Symbol;Acc:MGI:3702644]	1.15823	0.886928	0.746815	1.4962	1.14645	1.99073	0.930656	1.54446	-0.369382	0.0147426	-0.78138	-0.75441	-0.370286	-1.16641	-1.00248	-0.618352	-1.41447
ENSMUSG00000028581	1.43014	0.51616	1.88508	0.00126324	0.104644	4	130913125	130936141	1	Laptm5	lysosomal-associated protein transmembrane 5 [Source:MGI Symbol;Acc:MGI:108046]	3.28558	6.30352	4.58046	4.27096	3.07584	2.413	4.72319	3.25327	-0.378412	0.0951662	0.445317	0.561599	1.03518	1.38533	0.100934	0.574512	0.924663
ENSMUSG00000032203	1.47016	0.555974	1.65987	0.00128245	0.104874	NA	NA	NA	NA	NA	NA	4.16016	2.81916	3.6096	1.63221	3.88675	1.71927	3.52964	2.41274	1.34981	0.0980753	1.27485	0.788438	-0.463296	0.713474	1.14501	-0.106722	1.07005
ENSMUSG00000044017	1.45367	0.539695	1.64582	0.00127931	0.104874	5	129096750	129204599	1	Adgrd1	adhesion G protein-coupled receptor D1 [Source:MGI Symbol;Acc:MGI:3041203]	2.90738	3.76944	5.02855	2.96519	2.7403	2.32252	3.90179	2.676	-0.0284017	0.0853895	0.324032	0.346228	0.460019	0.698662	0.76202	0.875811	1.11445
ENSMUSG00000028373	-1.59116	-0.670075	0.436929	0.00129324	0.105082	4	65380803	66404611	-1	Astn2	astrotactin 2 [Source:MGI Symbol;Acc:MGI:1889277]	1.32369	0.886928	1.09533	1.27857	1.70569	2.38284	1.10198	1.78903	0.0500342	-0.365798	-0.848122	-0.527639	-0.943471	-1.4258	-0.223164	-0.638996	-1.12132
ENSMUSG00000020427	1.39767	0.483028	2.38936	0.00133419	0.107103	11	7206086	7213923	-1	Igfbp3	insulin-like growth factor binding protein 3 [Source:MGI Symbol;Acc:MGI:96438]	5.55476	7.98235	7.11963	5.27749	5.31282	4.10211	6.88558	4.89747	0.0738722	0.0642461	0.437358	0.596962	0.587336	0.960448	0.431952	0.422325	0.795437
ENSMUSG00000026413	-1.40531	-0.490885	2.40596	0.0013349	0.107103	1	135871395	135919207	-1	Pkp1	plakophilin 1 [Source:MGI Symbol;Acc:MGI:1328359]	5.57839	3.13592	3.58471	6.20241	5.0332	6.21349	4.09968	5.81636	-0.152979	0.148375	-0.155554	-0.983939	-0.682585	-0.986513	-0.790972	-0.489618	-0.793547
ENSMUSG00000059049	1.36925	0.453382	2.74574	0.00149725	0.119377	4	82897920	83052339	-1	Frem1	Fras1 related extracellular matrix protein 1 [Source:MGI Symbol;Acc:MGI:2670972]	7.18573	9.91458	13.2933	8.10666	9.25549	4.76568	10.1312	7.37594	-0.173973	-0.365175	0.592451	0.290445	0.099243	1.05687	0.71352	0.522318	1.47994
ENSMUSG00000094583	1.77151	0.824981	-0.253709	0.00152783	0.121059	NA	NA	NA	NA	NA	NA	1.04004	1.14034	0.970859	0.244832	0.671093	0.874714	1.05041	0.59688	2.08677	0.632054	0.249755	2.21959	0.764874	0.382575	1.98747	0.532749	0.15045
ENSMUSG00000098934	-1.35305	-0.436213	3.9315	0.00157875	0.124321	7	106186404	106189999	-1	Gm18853	predicted gene, 18853 [Source:MGI Symbol;Acc:MGI:5011038]	9.99856	12.8921	13.7165	18.1992	18.1754	13.0604	12.2024	16.4783	-0.86408	-0.862197	-0.385405	-0.497383	-0.495499	-0.0187075	-0.407961	-0.406078	0.0707141
ENSMUSG00000020053	1.3294	0.410775	5.34342	0.001605	0.125614	10	87858265	87937042	1	Igf1	insulin-like growth factor 1 [Source:MGI Symbol;Acc:MGI:96432]	37.6305	61.0713	60.6911	34.4125	59.2239	26.1208	53.131	39.9191	0.128971	-0.654277	0.526705	0.827563	0.044314	1.2253	0.818554	0.0353053	1.21629
ENSMUSG00000028664	1.35885	0.442386	3.32385	0.00162242	0.126203	4	136647539	136835988	-1	Ephb2	Eph receptor B2 [Source:MGI Symbol;Acc:MGI:99611]	9.90401	14.4126	12.6958	9.60285	9.36734	8.17405	12.3375	9.04808	0.0445502	0.0803739	0.276961	0.585793	0.621617	0.818204	0.402822	0.438646	0.635233
ENSMUSG00000025427	-1.68119	-0.749481	0.102044	0.00171882	0.132891	18	77456110	77565147	-1	Rnf165	ring finger protein 165 [Source:MGI Symbol;Acc:MGI:2444521]	0.756392	0.728548	0.697027	1.06094	0.866828	1.77959	0.727322	1.23579	-0.488134	-0.196612	-1.23434	-0.542245	-0.250723	-1.28845	-0.606054	-0.314532	-1.35226
ENSMUSG00000047250	-1.32194	-0.402654	7.11588	0.00175864	0.13515	2	36230426	36252272	1	Ptgs1	prostaglandin-endoperoxide synthase 1 [Source:MGI Symbol;Acc:MGI:97797]	92.9181	70.1306	74.5072	112.432	79.5525	122.189	79.1853	104.724	-0.275025	0.224053	-0.395078	-0.680939	-0.181862	-0.800992	-0.593604	-0.0945266	-0.713657
ENSMUSG00000003153	-1.3371	-0.419103	4.32358	0.00179338	0.136995	6	122727809	122801640	-1	Slc2a3	solute carrier family 2 (facilitated glucose transporter), member 3 [Source:MGI Symbol;Acc:MGI:95757]	19.6898	18.8472	15.484	23.8847	13.4498	34.9584	18.007	24.0976	-0.278636	0.549864	-0.828188	-0.341736	0.486764	-0.891288	-0.625313	0.203187	-1.17487
ENSMUSG00000097709	-1.45924	-0.545216	1.56283	0.0018472	0.140266	13	3478230	3501393	1	2810429I04Rik	RIKEN cDNA 2810429I04 gene [Source:MGI Symbol;Acc:MGI:1924187]	2.71829	2.56576	1.69278	2.74756	3.07584	4.37357	2.32561	3.39899	-0.0154533	-0.178285	-0.686115	-0.0987666	-0.261598	-0.769428	-0.698756	-0.861587	-1.36942
ENSMUSG00000002804	-1.54026	-0.623172	0.750686	0.00189297	0.142891	12	112934291	112942124	-1	Nudt14	nudix (nucleoside diphosphate linked moiety X)-type motif 14 [Source:MGI Symbol;Acc:MGI:1913424]	1.30005	1.23536	1.46874	2.23069	1.67773	2.29235	1.33472	2.06693	-0.778924	-0.367946	-0.818264	-0.852555	-0.441577	-0.891895	-0.602916	-0.191938	-0.642256
ENSMUSG00000097796	-1.66056	-0.731666	0.239469	0.00193234	0.145005	17	8379045	8389468	-1	Gm16702	predicted gene, 16702 [Source:MGI Symbol;Acc:MGI:4439626]	0.921853	0.760224	0.672133	1.16975	0.950715	1.83992	0.784737	1.32013	-0.343594	-0.0444758	-0.997031	-0.621707	-0.322589	-1.27514	-0.799384	-0.500266	-1.45282
ENSMUSG00000030446	1.4001	0.485525	2.21251	0.00194933	0.145425	13	67813740	67827002	1	Zfp273	zinc finger protein 273 [Source:MGI Symbol;Acc:MGI:3036278]	5.31838	5.82838	5.10323	4.05333	4.25026	3.25756	5.41667	3.85371	0.391881	0.323438	0.707198	0.523988	0.455546	0.839305	0.332305	0.263862	0.647621
ENSMUSG00000038963	-1.43204	-0.518067	1.87382	0.00198636	0.147326	2	180456245	180474867	1	Slco4a1	solute carrier organic anion transporter family, member 4a1 [Source:MGI Symbol;Acc:MGI:1351866]	3.21467	2.02726	2.29023	3.21002	2.46067	5.27845	2.51072	3.64971	0.0020879	0.385616	-0.715444	-0.663048	-0.27952	-1.38058	-0.487088	-0.10356	-1.20462
ENSMUSG00000032419	1.31532	0.395413	7.03352	0.00205542	0.151567	9	87702800	87731260	-1	Tbx18	T-box18 [Source:MGI Symbol;Acc:MGI:1923615]	162.293	153.28	143.463	114.609	125.187	109.188	153.012	116.328	0.50189	0.374522	0.571784	0.419456	0.292088	0.48935	0.323965	0.196597	0.393859
ENSMUSG00000058057	-1.61957	-0.69561	0.102	0.00208945	0.15319	15	100334929	100340341	1	Mettl7a3	methyltransferase like 7A3 [Source:MGI Symbol;Acc:MGI:3710670]	0.992765	0.95028	0.746815	1.71382	0.699055	1.96057	0.89662	1.45782	-0.787694	0.506046	-0.981746	-0.850794	0.442946	-1.04485	-1.1984	0.0953441	-1.39245
ENSMUSG00000087560	-1.55372	-0.63573	0.596979	0.00210596	0.153519	NA	NA	NA	NA	NA	NA	1.2055	0.886928	1.26958	2.17628	0.838866	2.29235	1.12067	1.76917	-0.852235	0.52312	-0.927198	-1.29498	0.0803759	-1.36994	-0.77751	0.597844	-0.852473
ENSMUSG00000049539	-1.4469	-0.532964	1.35526	0.00212222	0.153824	13	23763717	23764358	1	Hist1h1a	histone cluster 1, H1a [Source:MGI Symbol;Acc:MGI:1931523]	2.69465	1.64715	2.09108	3.99892	2.01328	3.40837	2.14429	3.14019	-0.569514	0.42055	-0.338985	-1.27964	-0.289574	-1.04911	-0.935362	0.0547021	-0.704833
ENSMUSG00000033377	1.73484	0.794803	-0.163719	0.00213531	0.153899	3	116918258	116968987	-1	Palmd	palmdelphin [Source:MGI Symbol;Acc:MGI:2148896]	0.827304	1.10866	1.24469	0.408053	0.699055	0.723901	1.06022	0.610337	1.01966	0.243012	0.192624	1.44199	0.665338	0.614951	1.60896	0.83231	0.781923
ENSMUSG00000060600	-1.3463	-0.428995	3.36576	0.00218023	0.156254	11	70657202	70662513	1	Eno3	enolase 3, beta muscle [Source:MGI Symbol;Acc:MGI:95395]	12.1023	8.64755	7.02006	13.1393	8.47255	15.8957	9.25663	12.5025	-0.118611	0.514411	-0.393355	-0.603527	0.0294947	-0.878271	-0.904335	-0.271313	-1.17908
ENSMUSG00000028524	-1.41348	-0.499255	2.05294	0.0021931	0.156298	4	102741297	102973628	1	Sgip1	SH3-domain GRB2-like (endophilin) interacting protein 1 [Source:MGI Symbol;Acc:MGI:1920344]	3.49831	2.88252	2.88768	4.13494	4.05452	4.97682	3.0895	4.38876	-0.241206	-0.212871	-0.508565	-0.520538	-0.492203	-0.787897	-0.517953	-0.489618	-0.785312
ENSMUSG00000029379	-1.425	-0.510962	2.07125	0.00221686	0.157114	5	90786103	90789600	1	Cxcl3	chemokine (C-X-C motif) ligand 3 [Source:MGI Symbol;Acc:MGI:3037818]	3.19103	2.21732	2.66364	3.1012	3.97063	4.55455	2.69066	3.87546	0.0411937	-0.315347	-0.513285	-0.484012	-0.840553	-1.03849	-0.21943	-0.57597	-0.773909
ENSMUSG00000039742	-1.49435	-0.579516	0.916766	0.00231915	0.163455	6	29319140	29336019	1	Fam71f1	family with sequence similarity 71, member F1 [Source:MGI Symbol;Acc:MGI:3032524]	1.60733	1.07698	1.6181	1.60501	1.62181	3.34804	1.43414	2.19162	0.0020879	-0.0129334	-1.05865	-0.575585	-0.590607	-1.63632	0.0117178	-0.00330345	-1.04902
ENSMUSG00000021822	-1.31761	-0.397923	5.49646	0.00238031	0.164576	14	20836662	20843388	1	Plau	plasminogen activator, urokinase [Source:MGI Symbol;Acc:MGI:97611]	41.0579	24.5172	26.263	41.2134	33.4987	46.5107	30.6127	40.4076	-0.00545194	0.293555	-0.179901	-0.749317	-0.450311	-0.923767	-0.650082	-0.351075	-0.824531
ENSMUSG00000022054	-1.41436	-0.500145	1.59344	0.00237845	0.164576	14	68082590	68124846	-1	Nefm	neurofilament, medium polypeptide [Source:MGI Symbol;Acc:MGI:97314]	3.97106	2.05894	2.04129	3.72689	3.88675	3.9513	2.69043	3.85498	0.0915534	0.0309611	0.00719834	-0.856069	-0.916662	-0.940424	-0.868487	-0.929079	-0.952842
ENSMUSG00000040428	1.35038	0.43336	3.11131	0.00238666	0.164576	7	45526330	45554229	1	Plekha4	pleckstrin homology domain containing, family A (phosphoinositide binding specific) member 4 [Source:MGI Symbol;Acc:MGI:1916467]	8.01303	13.0822	10.1318	7.31775	8.78013	6.90723	10.409	7.66837	0.130947	-0.131894	0.214242	0.83813	0.575289	0.921425	0.469416	0.206574	0.55271
ENSMUSG00000066705	1.37804	0.462619	2.17141	0.00235642	0.164576	9	45370185	45396159	1	Fxyd6	FXYD domain-containing ion transport regulator 6 [Source:MGI Symbol;Acc:MGI:1890226]	3.40377	7.34883	7.59262	4.95105	5.56448	2.65431	6.11507	4.38994	-0.540602	-0.709115	0.358797	0.569781	0.401268	1.46918	0.616864	0.448351	1.51626
ENSMUSG00000037868	-1.35876	-0.442294	2.98925	0.00242713	0.166467	10	67535475	67542188	1	Egr2	early growth response 2 [Source:MGI Symbol;Acc:MGI:95296]	8.20213	5.09983	4.87919	6.06639	13.4219	5.30861	6.06038	8.26562	0.43516	-0.710514	0.627664	-0.250388	-1.39606	-0.057884	-0.314197	-1.45987	-0.121693
ENSMUSG00000024168	1.38491	0.469789	2.20964	0.00244905	0.167073	17	25057702	25081181	-1	Tmem204	transmembrane protein 204 [Source:MGI Symbol;Acc:MGI:3039635]	4.01833	6.36687	6.49729	3.89011	4.64173	3.58934	5.6275	4.04039	0.0467877	-0.208064	0.162877	0.710775	0.455924	0.826865	0.740028	0.485176	0.856117
ENSMUSG00000027656	1.30635	0.385537	7.82009	0.00254185	0.17248	2	163820861	163833146	1	Wisp2	WNT1 inducible signaling pathway protein 2 [Source:MGI Symbol;Acc:MGI:1328326]	153.689	330.286	305.646	219.206	230.492	154.553	263.207	201.417	-0.51227	-0.584701	-0.008083	0.591425	0.518994	1.09561	0.479575	0.407144	0.983762
ENSMUSG00000069072	-1.36874	-0.452847	2.58755	0.00255631	0.172544	3	31202858	31310378	-1	Slc7a14	solute carrier family 7 (cationic amino acid transporter, y+ system), member 14 [Source:MGI Symbol;Acc:MGI:3040688]	5.62567	4.68805	4.80451	7.26335	4.47395	9.04877	5.03941	6.92869	-0.36861	0.330474	-0.685697	-0.631648	0.0674368	-0.948735	-0.596246	0.102839	-0.913333
ENSMUSG00000033066	-1.31252	-0.392338	5.6762	0.00258737	0.173721	11	67455437	67688990	1	Gas7	growth arrest specific 7 [Source:MGI Symbol;Acc:MGI:1202388]	37.1341	50.1114	50.2357	67.764	60.2586	52.3019	45.8271	60.1082	-0.867774	-0.69842	-0.494117	-0.435381	-0.266027	-0.0617236	-0.431806	-0.262452	-0.0581489
ENSMUSG00000057948	-1.32074	-0.401348	4.52372	0.00260271	0.173837	11	116062095	116077961	-1	Unc13d	unc-13 homolog D (C. elegans) [Source:MGI Symbol;Acc:MGI:1917700]	23.0936	21.3496	18.297	31.7737	14.3726	36.7682	20.9134	27.6382	-0.460342	0.684175	-0.670964	-0.573625	0.570892	-0.784247	-0.796231	0.348286	-1.00685
ENSMUSG00000004707	-1.56643	-0.647483	0.363226	0.00267143	0.177426	1	171588624	171607410	-1	Ly9	lymphocyte antigen 9 [Source:MGI Symbol;Acc:MGI:96885]	0.874579	1.07698	1.1949	1.82264	1.17441	1.9304	1.04882	1.64248	-1.05937	-0.425279	-1.14224	-0.759031	-0.124943	-0.841906	-0.609134	0.0249548	-0.692009
ENSMUSG00000090399	-1.36507	-0.448971	2.57419	0.00268427	0.177426	1	135606447	135688105	-1	Gm38399	predicted gene, 38399 [Source:MGI Symbol;Acc:MGI:5620007]	5.48384	4.90978	5.626	7.58979	6.8787	7.45015	5.33988	7.30621	-0.468872	-0.326949	-0.442082	-0.628402	-0.486479	-0.601612	-0.431949	-0.290026	-0.405159
ENSMUSG00000021388	1.33415	0.415916	3.15452	0.00276433	0.181776	13	49544443	49567565	1	Aspn	asporin [Source:MGI Symbol;Acc:MGI:1913945]	6.66571	14.6026	15.9072	6.39283	18.5389	2.74479	12.3918	9.22552	0.0603025	-1.47573	1.28006	1.1917	-0.344331	2.41146	1.31515	-0.220883	2.53491
ENSMUSG00000057886	-1.40561	-0.491198	1.13285	0.00286771	0.187192	14	73955000	73955551	-1	Cbx3-ps6	chromobox 3, pseudogene 6 [Source:MGI Symbol;Acc:MGI:3646710]	4.01833	0	2.38981	7.48098	0	1.87008	2.13605	3.11702	-0.896629	#DIV/0!	1.1035	#NUM!	#DIV/0!	#NUM!	-1.64633	#DIV/0!	0.353795
ENSMUSG00000061411	-1.30871	-0.388149	5.54786	0.00287604	0.187192	2	153407462	153529971	-1	Nol4l	nucleolar protein 4-like [Source:MGI Symbol;Acc:MGI:1918765]	47.4873	44.4414	35.6977	61.8609	28.2698	76.9447	42.5421	55.6918	-0.381487	0.748279	-0.696281	-0.477122	0.652644	-0.791917	-0.793194	0.336572	-1.10799
ENSMUSG00000022206	1.30714	0.386415	5.73169	0.00297257	0.189605	15	11839896	11905674	-1	Npr3	natriuretic peptide receptor 3 [Source:MGI Symbol;Acc:MGI:97373]	76.3011	54.356	53.5217	48.4223	44.7395	47.8077	61.3929	46.9898	0.656031	0.770153	0.674462	0.166767	0.280889	0.185197	0.144452	0.258574	0.162883
ENSMUSG00000049128	-1.43534	-0.521395	1.45725	0.00293156	0.189605	3	92570902	92573735	-1	Ivl	involucrin [Source:MGI Symbol;Acc:MGI:96626]	2.64737	2.21732	1.76746	3.48205	2.0692	4.01162	2.21072	3.18763	-0.395377	0.355486	-0.599624	-0.651122	0.0997412	-0.855369	-0.97826	-0.227397	-1.18251
ENSMUSG00000084372	-1.66066	-0.731753	0.141583	0.00294661	0.189605	2	123273924	123274211	1	Gm13988	predicted gene 13988 [Source:MGI Symbol;Acc:MGI:3651685]	1.13459	0.728548	0.248938	2.01306	0.50332	0.995365	0.704025	1.17058	-0.827223	1.17262	0.188872	-1.4663	0.533549	-0.450201	-3.01553	-1.01569	-1.99944
ENSMUSG00000097230	-1.39313	-0.478331	2.31568	0.002972	0.189605	8	19789798	19798548	1	Gm26853	predicted gene, 26853 [Source:MGI Symbol;Acc:MGI:5477347]	3.73469	3.54771	2.96236	5.16867	3.27158	5.85154	3.41492	4.76393	-0.468807	0.191001	-0.647828	-0.542906	0.116902	-0.721927	-0.803045	-0.143237	-0.982066
ENSMUSG00000009281	1.519	0.603119	0.533884	0.00307408	0.194139	6	48569696	48572789	-1	Rarres2	retinoic acid receptor responder (tazarotene induced) 2 [Source:MGI Symbol;Acc:MGI:1918910]	0.661843	2.59743	1.91682	1.14255	1.78958	0.331788	1.72537	1.08797	-0.787694	-1.43506	0.996227	1.18483	0.537464	2.96875	0.746462	0.0990963	2.53038
ENSMUSG00000074482	-1.34295	-0.425402	3.03611	0.00306735	0.194139	8	4087658	4088575	1	Gm16589	predicted gene 16589 [Source:MGI Symbol;Acc:MGI:4418561]	7.35119	6.43023	7.74198	7.18174	14.2887	7.48032	7.17446	9.65025	0.0336448	-0.958824	-0.0251216	-0.159463	-1.15193	-0.21823	0.10837	-0.884099	0.0496033
ENSMUSG00000096987	-1.51749	-0.601686	0.76198	0.00310749	0.195282	4	88784455	88794391	-1	Gm26525	predicted gene, 26525 [Source:MGI Symbol;Acc:MGI:5477019]	1.5837	1.64715	0.821496	2.09467	2.0692	1.9304	1.35078	2.03143	-0.403429	-0.385779	-0.285607	-0.346752	-0.329102	-0.22893	-1.3504	-1.33275	-1.23258
ENSMUSG00000015340	1.42915	0.51516	1.30776	0.00323529	0.202316	X	9435252	9487771	-1	Cybb	cytochrome b-245, beta polypeptide [Source:MGI Symbol;Acc:MGI:88574]	2.24554	4.24458	2.63875	2.23069	2.43271	1.59862	3.04296	2.08734	0.00957171	-0.115503	0.490239	0.928132	0.803057	1.4088	0.242361	0.117287	0.723029
ENSMUSG00000063767	-1.54428	-0.626936	0.6406	0.00332493	0.206908	3	90654017	90658669	1	S100a7a	S100 calcium binding protein A7A [Source:MGI Symbol;Acc:MGI:2687194]	1.25277	0.918604	0.921071	1.57781	0.838866	2.44317	1.03082	1.61995	-0.332792	0.578615	-0.963626	-0.780405	0.131002	-1.41124	-0.776535	0.134872	-1.40737
ENSMUSG00000021250	-1.36001	-0.443619	2.50278	0.00342605	0.212166	12	85473890	85477273	1	Fos	FBJ osteosarcoma oncogene [Source:MGI Symbol;Acc:MGI:95574]	7.35119	3.00922	2.58896	3.8357	9.81473	4.16243	4.31645	5.93762	0.938488	-0.416972	0.82055	-0.350101	-1.70556	-0.468038	-0.567119	-1.92258	-0.685056
ENSMUSG00000020810	1.33032	0.41177	3.0625	0.00372287	0.227915	11	116645595	116654313	-1	Cygb	cytoglobin [Source:MGI Symbol;Acc:MGI:2149481]	3.66378	12.7021	11.7001	6.25682	11.4645	3.13691	9.35531	6.95274	-0.772098	-1.64577	0.223989	1.02156	0.14789	2.01765	0.90302	0.0293466	1.89911
ENSMUSG00000024846	-1.32346	-0.404313	3.44262	0.00375183	0.227915	19	5344705	5349574	-1	Cst6	cystatin E/M [Source:MGI Symbol;Acc:MGI:1920970]	10.2822	9.6295	10.2563	15.6964	8.41662	15.8655	10.056	13.3262	-0.610288	0.288837	-0.625743	-0.704905	0.194219	-0.720361	-0.613934	0.285191	-0.62939
ENSMUSG00000040904	1.41367	0.499447	1.57516	0.00374854	0.227915	11	70235206	70239830	-1	Gm21988	predicted gene 21988 [Source:MGI Symbol;Acc:MGI:5439457]	3.33285	3.23095	3.2113	2.91078	2.57252	1.38748	3.25837	2.29026	0.195352	0.373574	1.26429	0.150553	0.328775	1.21949	0.141753	0.319975	1.21069
ENSMUSG00000048988	-1.59385	-0.67252	0.214528	0.00370785	0.227915	5	139907943	139974722	1	Elfn1	leucine rich repeat and fibronectin type III, extracellular 1 [Source:MGI Symbol;Acc:MGI:2442479]	0.756392	0.981956	0.896178	1.4962	1.37015	1.29699	0.878175	1.38778	-0.984092	-0.857125	-0.777961	-0.607569	-0.480602	-0.401438	-0.739442	-0.612475	-0.533311
ENSMUSG00000034586	-1.4049	-0.490463	1.65025	0.00385374	0.228661	11	115347707	115367756	-1	Hid1	HID1 domain containing [Source:MGI Symbol;Acc:MGI:2445087]	2.7892	2.249	2.76321	4.51579	2.88011	3.61951	2.60047	3.6718	-0.695128	-0.0462727	-0.375944	-1.0057	-0.356842	-0.686513	-0.708631	-0.0597749	-0.389446
ENSMUSG00000062727	-1.30319	-0.382052	4.89817	0.00382812	0.228661	13	22035870	22036345	1	Hist1h2bk	histone cluster 1, H2bk [Source:MGI Symbol;Acc:MGI:2448399]	26.1192	26.7029	27.1841	42.5736	25.2778	36.4062	26.6687	34.7525	-0.704848	0.0472365	-0.479075	-0.672963	0.0791214	-0.44719	-0.647197	0.104888	-0.421424
ENSMUSG00000074865	1.37589	0.460363	2.11335	0.00378435	0.228661	13	62479827	62571199	-1	Zfp934	zinc finger protein 934 [Source:MGI Symbol;Acc:MGI:1924367]	4.34926	5.22654	4.38131	3.50926	5.20097	1.32715	4.65237	3.34579	0.309603	-0.258012	1.71243	0.57469	0.00707498	1.97752	0.320197	-0.247417	1.72303
ENSMUSG00000089417	-1.46148	-0.547427	1.3771	0.00384217	0.228661	3	69085105	69085447	-1	Gm22009	predicted gene, 22009 [Source:MGI Symbol;Acc:MGI:5451786]	2.00917	1.01363	1.24469	2.39391	1.00664	2.98609	1.4225	2.12888	-0.252773	0.997051	-0.571662	-1.23984	0.00998657	-1.55873	-0.943582	0.306241	-1.26247
ENSMUSG00000096111	-1.67609	-0.745096	-0.207056	0.00381667	0.228661	15	99931711	99953044	1	Gm21917	predicted gene, 21917 [Source:MGI Symbol;Acc:MGI:5434081]	0.732755	0.443464	0.597452	1.30577	0.699055	1.02553	0.591224	1.01012	-0.833498	0.0679249	-0.484963	-1.55801	-0.65659	-1.20948	-1.12801	-0.226584	-0.779471
ENSMUSG00000044548	1.29248	0.370137	6.41203	0.00400824	0.235707	12	71309884	71320107	1	Dact1	dishevelled-binding antagonist of beta-catenin 1 [Source:MGI Symbol;Acc:MGI:1891740]	92.6817	122.998	116.827	84.9023	94.7919	77.4876	110.835	85.7273	0.126481	-0.0324788	0.258319	0.534758	0.375798	0.666596	0.460495	0.301535	0.592332
ENSMUSG00000084106	-1.52491	-0.608723	0.287529	0.00400944	0.235707	1	86908793	86909683	-1	Gm6136	predicted pseudogene 6136 [Source:MGI Symbol;Acc:MGI:3646897]	1.22914	2.66078	0.348514	1.5234	1.50996	3.19723	1.41281	2.07686	-0.309647	-0.296863	-1.37918	0.804557	0.817341	-0.264972	-2.12801	-2.11522	-3.19754
ENSMUSG00000018752	1.47706	0.562732	1.0131	0.00402902	0.235772	11	69682577	69696098	-1	Tnfsfm13	tumor necrosis factor (ligand) superfamily, membrane-bound member 13 [Source:MGI Symbol;Acc:MGI:3845075]	2.24554	2.40738	2.21555	0.870514	2.18105	1.59862	2.28949	1.55006	1.36712	0.0420382	0.490239	1.46752	0.142437	0.590638	1.34773	0.0226409	0.470842
ENSMUSG00000046721	-1.29115	-0.368659	6.94721	0.00405979	0.236488	7	45324965	45325617	1	Rpl14-ps1	ribosomal protein L14, pseudogene 1 [Source:MGI Symbol;Acc:MGI:3710579]	113.813	121.826	115.756	177.503	123.118	153.045	117.132	151.222	-0.641174	-0.113366	-0.427284	-0.543024	-0.0152165	-0.329134	-0.616754	-0.0889464	-0.402864
ENSMUSG00000015745	-1.31189	-0.391644	3.92523	0.00414711	0.236882	3	95988429	95996001	-1	Plekho1	pleckstrin homology domain containing, family O member 1 [Source:MGI Symbol;Acc:MGI:1914470]	14.1351	12.2586	12.9946	17.8455	14.5963	19.304	13.1294	17.2486	-0.336282	-0.0463195	-0.449622	-0.541767	-0.251805	-0.655108	-0.457653	-0.16769	-0.570993
ENSMUSG00000024533	1.30679	0.386024	4.3145	0.00412541	0.236882	18	67488209	67552777	-1	Spire1	spire homolog 1 (Drosophila) [Source:MGI Symbol;Acc:MGI:1915416]	25.9774	22.4266	23.5247	16.3765	18.0915	20.6312	23.9762	18.3664	0.665624	0.521939	0.332427	0.453581	0.309895	0.120384	0.522544	0.378858	0.189347
ENSMUSG00000025867	1.29348	0.371253	5.90019	0.00412156	0.236882	13	54371349	54383917	1	Cplx2	complexin 2 [Source:MGI Symbol;Acc:MGI:104726]	79.1612	74.0901	79.0877	56.6106	61.6287	61.411	77.4463	59.8834	0.483722	0.361191	0.366297	0.38821	0.265679	0.270785	0.482381	0.359851	0.364956
ENSMUSG00000029651	1.30559	0.384706	4.31633	0.00413059	0.236882	5	147957320	148316065	1	Mtus2	microtubule associated tumor suppressor candidate 2 [Source:MGI Symbol;Acc:MGI:1915388]	21.5335	26.7662	22.8525	17.247	20.0209	17.1625	23.7174	18.1435	0.320236	0.105076	0.327326	0.634063	0.418903	0.641153	0.406004	0.190844	0.413094
ENSMUSG00000064341	1.28779	0.364899	9.5164	0.00415941	0.236882	MT	2751	3707	1	mt-Nd1	mitochondrially encoded NADH dehydrogenase 1 [Source:MGI Symbol;Acc:MGI:101787]	868.906	868.492	687.742	597.118	749.052	536.954	808.38	627.708	0.541184	0.214135	0.694401	0.540497	0.213448	0.693715	0.203851	-0.123198	0.357068
ENSMUSG00000072949	-1.35162	-0.434695	2.56247	0.00420937	0.237606	12	84009490	84018371	1	Acot1	acyl-CoA thioesterase 1 [Source:MGI Symbol;Acc:MGI:1349396]	5.03474	4.49799	5.00366	6.77368	5.39671	7.54064	4.84546	6.57034	-0.428024	-0.100163	-0.582771	-0.59066	-0.262798	-0.745406	-0.436957	-0.109096	-0.591704
ENSMUSG00000078624	-1.36157	-0.44527	2.27856	0.00420018	0.237606	7	103548074	103555506	1	Olfr613	olfactory receptor 613 [Source:MGI Symbol;Acc:MGI:3030447]	4.46744	2.97754	3.70918	4.78782	3.80286	6.75641	3.71806	5.1157	-0.0999211	0.232364	-0.596809	-0.685248	-0.352962	-1.18214	-0.36827	-0.0359846	-0.865158
ENSMUSG00000096493	-1.3056	-0.38471	4.17866	0.0042332	0.237898	NA	NA	NA	NA	NA	NA	21.2499	14.9511	14.0899	19.4233	26.7878	19.5453	16.7636	21.9188	0.129665	-0.33412	0.120631	-0.377542	-0.841327	-0.386576	-0.463129	-0.926914	-0.472163
ENSMUSG00000031099	1.3691	0.453226	1.98629	0.00434765	0.241598	X	47809368	47892974	-1	Smarca1	SWI/SNF related, matrix associated, actin dependent regulator of chromatin, subfamily a, member 1 [Source:MGI Symbol;Acc:MGI:1935127]	3.09648	4.94145	5.77537	3.29163	4.78154	1.9304	4.60443	3.33452	-0.0881721	-0.626845	0.681727	0.586134	0.0474613	1.35603	0.811111	0.272438	1.58101
ENSMUSG00000078878	1.31547	0.395573	3.69348	0.00435585	0.241598	2	176708328	176721813	1	Gm14305	predicted gene 14305 [Source:MGI Symbol;Acc:MGI:3709632]	14.4896	13.0505	16.0067	10.9358	13.8413	8.32487	14.5156	11.034	0.40596	0.0660433	0.799523	0.255044	-0.0848726	0.648607	0.549616	0.2097	0.943179
ENSMUSG00000097163	-1.32092	-0.401539	3.35487	0.00435275	0.241598	5	117312518	117315645	-1	BC051077	cDNA sequence BC051077 [Source:MGI Symbol;Acc:MGI:3039587]	10.755	8.93263	7.41836	14.8259	5.92799	15.1114	9.03531	11.9551	-0.463122	0.859387	-0.49064	-0.730966	0.591542	-0.758485	-0.998951	0.323558	-1.02647
ENSMUSG00000019278	1.29121	0.368726	5.63059	0.00447806	0.243037	8	123186242	123201812	1	Dpep1	dipeptidase 1 (renal) [Source:MGI Symbol;Acc:MGI:94917]	45.0526	72.3796	67.8606	48.9664	54.8618	39.5431	61.7643	47.7904	-0.120181	-0.284192	0.188184	0.563792	0.399781	0.872157	0.470782	0.30677	0.779147
ENSMUSG00000029417	1.38111	0.465823	1.55524	0.00448051	0.243037	5	92321347	92328079	-1	Cxcl9	chemokine (C-X-C motif) ligand 9 [Source:MGI Symbol;Acc:MGI:1352449]	2.19827	5.70168	3.65939	2.36671	4.27822	1.53829	3.85311	2.72774	-0.106517	-0.960644	0.515037	1.2685	0.414377	1.89006	0.628722	-0.225406	1.25028
ENSMUSG00000031618	1.53457	0.617831	0.300896	0.00450827	0.243037	8	76899442	77245012	1	Nr3c2	nuclear receptor subfamily 3, group C, member 2 [Source:MGI Symbol;Acc:MGI:99459]	1.53642	1.5838	1.66789	1.06094	1.28626	0.754064	1.59604	1.03375	0.534234	0.256391	1.02682	0.578049	0.300206	1.07063	0.65268	0.374837	1.14526
ENSMUSG00000053199	1.31785	0.398188	3.58069	0.00444772	0.243037	9	51765337	51853856	1	Arhgap20	Rho GTPase activating protein 20 [Source:MGI Symbol;Acc:MGI:2445175]	9.36036	14.3175	13.3431	8.62352	11.8839	7.48032	12.3403	9.32926	0.118286	-0.344378	0.323464	0.731435	0.268772	0.936613	0.629743	0.16708	0.834922
ENSMUSG00000085133	-1.33591	-0.417823	2.9073	0.00451515	0.243037	14	121248706	121253971	1	B930095G15Rik	RIKEN cDNA B930095G15 gene [Source:MGI Symbol;Acc:MGI:2443701]	6.35842	5.76503	6.09899	7.15453	6.59908	10.6775	6.07415	8.14372	-0.170189	-0.0535959	-0.747839	-0.311529	-0.194937	-0.88918	-0.230288	-0.113695	-0.807939
ENSMUSG00000087556	-1.51113	-0.595625	0.489989	0.00450027	0.243037	16	18416682	18421997	1	Gm15764	predicted gene 15764 [Source:MGI Symbol;Acc:MGI:3783206]	1.37096	0.7919	1.04554	1.84984	1.45403	1.62878	1.06947	1.64422	-0.432214	-0.0848739	-0.248603	-1.22401	-0.876672	-1.0404	-0.823152	-0.475813	-0.639541
ENSMUSG00000091898	-1.40535	-0.490931	1.40349	0.00450456	0.243037	14	31208312	31211729	1	Tnnc1	troponin C, cardiac/slow skeletal [Source:MGI Symbol;Acc:MGI:98779]	2.55282	2.40738	2.16576	3.18282	2.93603	3.92113	2.37532	3.34666	-0.318209	-0.201773	-0.619176	-0.402842	-0.286406	-0.70381	-0.555428	-0.438992	-0.856395
ENSMUSG00000034912	-1.36015	-0.443764	2.36336	0.00489535	0.262395	12	66466060	67222549	-1	Mdga2	MAM domain containing glycosylphosphatidylinositol anchor 2 [Source:MGI Symbol;Acc:MGI:2444706]	4.46744	3.83279	3.33577	5.52232	3.63509	6.72625	3.87867	5.29455	-0.305825	0.297459	-0.590354	-0.526878	0.076407	-0.811406	-0.727254	-0.123969	-1.01178
ENSMUSG00000024726	-1.30833	-0.387726	3.76106	0.00501432	0.267647	19	18670780	18704788	1	Carnmt1	carnosine N-methyltransferase 1 [Source:MGI Symbol;Acc:MGI:1914633]	11.7714	13.7157	11.7499	10.4462	27.0115	11.1601	12.4123	16.2059	0.172308	-1.19829	0.0769244	0.392856	-0.977745	0.297472	0.169674	-1.20093	0.0742904
ENSMUSG00000017652	-1.29699	-0.375167	4.52954	0.00514897	0.270925	2	165055627	165072948	1	Cd40	CD40 antigen [Source:MGI Symbol;Acc:MGI:88336]	17.7989	20.8111	19.691	24.7008	24.3271	26.5431	19.4337	25.1903	-0.472774	-0.450781	-0.57655	-0.247204	-0.22521	-0.350979	-0.327022	-0.305028	-0.430797
ENSMUSG00000043017	1.32824	0.409516	2.92981	0.00513597	0.270925	7	16906490	16910905	1	Ptgir	prostaglandin I receptor (IP) [Source:MGI Symbol;Acc:MGI:99535]	6.90208	9.81956	8.0656	6.33843	7.24221	4.97682	8.26241	6.18582	0.122907	-0.0693989	0.471806	0.631533	0.439228	0.980433	0.347657	0.155351	0.696557
ENSMUSG00000066026	1.30003	0.378543	3.95728	0.00512801	0.270925	4	144892827	144928209	1	Dhrs3	dehydrogenase/reductase (SDR family) member 3 [Source:MGI Symbol;Acc:MGI:1315215]	10.3768	23.947	20.0644	13.0577	19.993	8.56617	18.1294	13.8723	-0.331545	-0.946138	0.276634	0.874947	0.260355	1.48313	0.619738	0.00514632	1.22792
ENSMUSG00000081656	-1.42827	-0.514264	0.781771	0.00516068	0.270925	4	76927311	76927655	1	Gm11246	predicted gene 11246 [Source:MGI Symbol;Acc:MGI:3651881]	2.52919	1.36207	1.24469	2.61154	2.18105	2.65431	1.71198	2.4823	-0.0462274	0.21365	-0.0696607	-0.939103	-0.679226	-0.962536	-1.06911	-0.809236	-1.09255
ENSMUSG00000046259	-1.51991	-0.603985	0.30652	0.00518409	0.271039	3	92385685	92387324	1	Sprr2h	small proline-rich protein 2H [Source:MGI Symbol;Acc:MGI:1330343]	1.34732	0.47514	0.871284	1.76823	0.810904	1.65894	0.897916	1.41269	-0.39221	0.732494	-0.300166	-1.89588	-0.771179	-1.80384	-1.02109	0.103612	-0.929048
ENSMUSG00000047155	-1.36743	-0.451469	2.11595	0.0052674	0.27427	4	115106323	115134281	-1	Cyp4x1	cytochrome P450, family 4, subfamily x, polypeptide 1 [Source:MGI Symbol;Acc:MGI:1932403]	3.4274	2.56576	3.18641	4.35257	2.12513	6.21349	3.05986	4.23039	-0.344751	0.689566	-0.858288	-0.762483	0.271834	-1.27602	-0.449935	0.584382	-0.963472
ENSMUSG00000049507	1.3681	0.452175	2.07211	0.0053334	0.276578	NA	NA	NA	NA	NA	NA	4.68018	4.43464	4.65514	3.42765	3.38343	3.25756	4.58999	3.35621	0.449345	0.468078	0.522773	0.371598	0.390331	0.445026	0.441608	0.460341	0.515036
ENSMUSG00000044519	-1.30064	-0.379217	4.04055	0.00542942	0.278337	14	33967070	33978764	-1	Zfp488	zinc finger protein 488 [Source:MGI Symbol;Acc:MGI:2686052]	16.3806	9.56615	10.7292	16.0501	10.6816	21.2043	12.2253	15.9786	0.0294085	0.616868	-0.372365	-0.746572	-0.159113	-1.14835	-0.581034	0.00642496	-0.982808
ENSMUSG00000052957	1.31318	0.393067	3.10432	0.00542547	0.278337	13	60174405	60177365	-1	Gas1	growth arrest specific 1 [Source:MGI Symbol;Acc:MGI:95655]	4.75109	13.3039	12.9448	6.25682	12.7508	4.40373	10.3333	7.80377	-0.39717	-1.42425	0.109531	1.08835	0.0612671	1.59505	1.04887	0.0217875	1.55557
ENSMUSG00000053117	-1.44047	-0.526542	0.820534	0.00543277	0.278337	19	60144675	60162591	1	E330013P04Rik	RIKEN cDNA E330013P04 gene [Source:MGI Symbol;Acc:MGI:2147732]	1.86734	1.33039	1.46874	1.93145	1.90143	2.98609	1.55549	2.27299	-0.0486983	-0.0260973	-0.677272	-0.537835	-0.515234	-1.16641	-0.395111	-0.37251	-1.02368
ENSMUSG00000074622	1.45922	0.545202	0.593807	0.00548159	0.279714	2	160363703	160367065	-1	Mafb	v-maf musculoaponeurotic fibrosarcoma oncogene family, protein B (avian) [Source:MGI Symbol;Acc:MGI:104555]	1.5837	2.78749	1.41895	1.44179	1.39811	1.02553	1.93004	1.28848	0.135437	0.179818	0.62693	0.951106	0.995487	1.4426	-0.0230374	0.0213436	0.468456
ENSMUSG00000086189	-1.71445	-0.777747	-0.382196	0.0055123	0.280161	3	30686085	30692366	1	Gm15462	predicted gene 15462 [Source:MGI Symbol;Acc:MGI:3705271]	0.685481	0.63352	0.248938	1.06094	0.475357	1.14618	0.522646	0.894158	-0.630153	0.528103	-0.741643	-0.743879	0.414377	-0.855369	-2.09148	-0.933225	-2.20297
ENSMUSG00000041828	1.28948	0.366787	4.53015	0.00555749	0.281337	11	110025634	110095978	-1	Abca8a	ATP-binding cassette, sub-family A (ABC1), member 8a [Source:MGI Symbol;Acc:MGI:2386846]	16.0024	35.4771	32.2375	21.0283	34.002	9.65202	27.9057	21.5608	-0.394044	-1.08733	0.729388	0.754553	0.0612671	1.87799	0.616405	-0.0768814	1.73984
ENSMUSG00000044367	-1.52848	-0.612097	0.305785	0.00567579	0.28619	11	70216789	70221064	-1	Slc16a13	solute carrier family 16 (monocarboxylic acid transporters), member 13 [Source:MGI Symbol;Acc:MGI:1916559]	1.06368	0.760224	0.945965	1.65942	1.0346	1.59862	0.923289	1.43088	-0.641616	0.0399845	-0.587763	-1.12618	-0.444579	-1.07233	-0.810817	-0.129216	-0.756964
ENSMUSG00000040502	1.39554	0.480822	1.53859	0.00586581	0.294607	10	127055011	127060184	-1	9-Mar	membrane-associated ring finger (C3HC4) 9 [Source:MGI Symbol;Acc:MGI:2446144]	2.95466	3.2943	3.73407	2.61154	2.23698	2.29235	3.32768	2.38029	0.17809	0.401441	0.366161	0.335072	0.558423	0.523143	0.515849	0.7392	0.70392
ENSMUSG00000020941	-1.30322	-0.382081	3.78664	0.00594303	0.297314	11	103219762	103267472	-1	Map3k14	mitogen-activated protein kinase kinase kinase 14 [Source:MGI Symbol;Acc:MGI:1858204]	11.2986	12.512	10.4803	17.3831	12.2195	15.021	11.4303	14.8745	-0.621537	-0.113038	-0.410831	-0.474368	0.0341309	-0.263662	-0.730003	-0.221503	-0.519297
ENSMUSG00000026463	-1.31958	-0.400081	2.84634	0.0060732	0.302353	1	133699457	133801041	-1	Atp2b4	ATPase, Ca++ transporting, plasma membrane 4 [Source:MGI Symbol;Acc:MGI:88111]	5.69658	5.86006	7.71709	8.48751	8.3607	8.62649	6.42457	8.49157	-0.575245	-0.553528	-0.598678	-0.534426	-0.512709	-0.557859	-0.137285	-0.115568	-0.160718
ENSMUSG00000058773	-1.42338	-0.50932	0.992315	0.00611078	0.302353	13	21779883	21780625	-1	Hist1h1b	histone cluster 1, H1b [Source:MGI Symbol;Acc:MGI:1861461]	2.26918	1.07698	1.39405	2.44832	1.76162	2.68447	1.58007	2.29814	-0.109622	0.365267	-0.242467	-1.1848	-0.709906	-1.31764	-0.812505	-0.337615	-0.94535
ENSMUSG00000070572	1.31514	0.395214	3.14777	0.00611485	0.302353	4	149457329	149457706	1	Trmt112-ps2	tRNA methyltransferase 11-2, pseudogene 2 [Source:MGI Symbol;Acc:MGI:3651720]	10.4713	8.64755	9.63391	9.222	6.93463	5.70072	9.58425	7.28578	0.18329	0.594551	0.877224	-0.0927894	0.318472	0.601145	0.0630413	0.474303	0.756976
ENSMUSG00000064358	1.27329	0.348558	9.74628	0.00617219	0.30401	MT	8607	9390	1	mt-Co3	mitochondrially encoded cytochrome c oxidase III [Source:MGI Symbol;Acc:MGI:102502]	980.686	1004.29	817.065	782.265	841.914	576.376	934.013	733.519	0.326134	0.220119	0.766781	0.360442	0.254427	0.801089	0.0627932	-0.0432219	0.50344
ENSMUSG00000055228	1.31812	0.398487	2.9443	0.00624896	0.305433	13	62453715	62558511	-1	Zfp935	zinc finger protein 935 [Source:MGI Symbol;Acc:MGI:1918758]	7.39846	9.09101	8.4639	6.44724	8.52847	3.86081	8.31779	6.27884	0.198544	-0.205062	0.938323	0.495759	0.0921531	1.23554	0.392641	-0.0109648	1.13242
ENSMUSG00000058624	1.3079	0.387254	3.0207	0.00623276	0.305433	19	21391307	21473445	-1	Gda	guanine deaminase [Source:MGI Symbol;Acc:MGI:95678]	5.31838	12.417	11.3267	6.69207	12.3593	2.95593	9.68735	7.33577	-0.331465	-1.21654	0.847375	0.89179	0.00671886	2.07063	0.759201	-0.12587	1.93804
ENSMUSG00000093954	-1.28731	-0.36436	4.473	0.00655941	0.319383	14	69363504	69503362	-1	Gm16867	predicted gene, 16867 [Source:MGI Symbol;Acc:MGI:4439791]	18.6734	19.1956	19.5168	25.2993	22.7892	25.789	19.1286	24.6258	-0.43811	-0.287363	-0.465768	-0.398318	-0.247571	-0.425976	-0.374384	-0.223637	-0.402042
ENSMUSG00000027611	-1.27909	-0.355123	5.35016	0.00658749	0.319531	2	155751117	155755471	1	Procr	protein C receptor, endothelial [Source:MGI Symbol;Acc:MGI:104596]	40.1597	32.0561	33.6564	49.048	36.0712	50.4016	35.2908	45.1736	-0.288445	0.1549	-0.327722	-0.613595	-0.17025	-0.652872	-0.543311	-0.0999662	-0.582588
ENSMUSG00000074121	1.55482	0.636752	-0.00128997	0.00661734	0.319763	7	45413695	45417179	1	Ntf5	neurotrophin 5 [Source:MGI Symbol;Acc:MGI:97381]	0.969128	1.61548	1.14512	0.979328	0.727017	0.633414	1.24324	0.77992	-0.0151049	0.414697	0.613539	0.722095	1.1519	1.35074	0.22563	0.655432	0.854273
ENSMUSG00000016494	-1.28568	-0.362535	4.56084	0.00676107	0.321906	1	194938819	194961279	1	Cd34	CD34 antigen [Source:MGI Symbol;Acc:MGI:88329]	16.8534	18.5621	23.5745	27.1491	26.3404	22.3505	19.6633	25.28	-0.68787	-0.64424	-0.407268	-0.548544	-0.504915	-0.267942	-0.203682	-0.160053	0.0769197
ENSMUSG00000018927	1.49854	0.583558	0.280655	0.00678786	0.321906	11	83587882	83593087	-1	Ccl6	chemokine (C-C motif) ligand 6 [Source:MGI Symbol;Acc:MGI:98263]	1.11095	2.31235	0.921071	1.33297	0.699055	0.754064	1.44812	0.928698	-0.262853	0.668317	0.559037	0.79471	1.72588	1.6166	-0.533263	0.397907	0.288626
ENSMUSG00000024548	1.2774	0.353215	5.56184	0.00675677	0.321906	18	78750380	79109391	-1	Setbp1	SET binding protein 1 [Source:MGI Symbol;Acc:MGI:1933199]	44.249	53.8809	53.6462	37.4865	46.613	34.6568	50.592	39.5854	0.239273	-0.0750889	0.352506	0.523402	0.209041	0.636635	0.517105	0.202743	0.630338
ENSMUSG00000071984	1.27113	0.346111	7.45727	0.00677054	0.321906	17	7738569	7827302	-1	Fndc1	fibronectin type III domain containing 1 [Source:MGI Symbol;Acc:MGI:1915905]	137.12	245.647	275.375	193.064	204.348	120.198	219.381	172.536	-0.49364	-0.57559	0.190026	0.347512	0.265562	1.03118	0.512324	0.430373	1.19599
ENSMUSG00000097667	-1.34494	-0.427543	2.12636	0.00674366	0.321906	12	87332488	87335655	1	Gm26764	predicted gene, 26764 [Source:MGI Symbol;Acc:MGI:5477258]	4.58563	4.18123	3.01215	6.31122	2.34883	7.20885	3.92634	5.28963	-0.4608	0.96518	-0.65265	-0.593992	0.831988	-0.785842	-1.06712	0.358856	-1.25897
ENSMUSG00000028015	1.28678	0.36377	4.24745	0.00685647	0.32276	3	81932601	81956725	1	Ctso	cathepsin O [Source:MGI Symbol;Acc:MGI:2139628]	17.6098	24.0421	22.9023	14.8531	22.8172	12.3968	21.5181	16.689	0.245608	-0.373744	0.506406	0.694794	0.0754423	0.955592	0.624726	0.00537444	0.885524
ENSMUSG00000040605	1.34389	0.426412	2.0238	0.00684716	0.32276	16	97356728	97439012	1	Bace2	beta-site APP-cleaving enzyme 2 [Source:MGI Symbol;Acc:MGI:1860440]	3.30922	6.08179	5.89984	4.18935	3.80286	3.28772	5.09695	3.75998	-0.340235	-0.200595	0.00940262	0.537771	0.677411	0.887409	0.49395	0.63359	0.843588
ENSMUSG00000096696	1.28587	0.362747	4.3427	0.00709676	0.332843	17	17064113	17089628	1	Zfp960	zinc finger protein 960 [Source:MGI Symbol;Acc:MGI:3052731]	22.5263	21.8881	20.6868	15.1796	23.0409	12.3667	21.7004	16.8624	0.569479	-0.0325833	0.865156	0.528015	-0.0740471	0.823693	0.446576	-0.155486	0.742253
ENSMUSG00000029084	-1.28647	-0.363422	4.09848	0.00734647	0.340796	5	43868553	43912375	1	Cd38	CD38 antigen [Source:MGI Symbol;Acc:MGI:107474]	14.8442	17.0734	16.405	18.8521	24.0475	19.2136	16.1075	20.7044	-0.344823	-0.695987	-0.372225	-0.142975	-0.49414	-0.170377	-0.200584	-0.551748	-0.227986
ENSMUSG00000042379	1.27647	0.352161	5.01346	0.00732395	0.340796	13	113209659	113218098	1	Esm1	endothelial cell-specific molecule 1 [Source:MGI Symbol;Acc:MGI:1918940]	38.9069	44.4097	33.1835	29.4342	35.5959	26.1509	38.8334	30.3937	0.402532	0.128317	0.573164	0.593381	0.319166	0.764013	0.172969	-0.101246	0.343602
ENSMUSG00000085976	-1.58386	-0.663447	-0.153972	0.00733858	0.340796	2	92742230	92759208	1	Gm13816	predicted gene 13816 [Source:MGI Symbol;Acc:MGI:3649317]	0.732755	0.601844	0.672133	1.36018	0.671093	1.17634	0.668911	1.0692	-0.892392	0.126819	-0.682902	-1.17633	-0.157123	-0.966844	-1.01698	0.00223473	-0.807486
ENSMUSG00000020542	-1.48573	-0.571177	0.539035	0.00741356	0.342662	11	65176561	65269989	-1	Myocd	myocardin [Source:MGI Symbol;Acc:MGI:2137495]	1.30005	0.823576	1.07043	2.01306	1.23034	1.56845	1.06469	1.60395	-0.630826	0.0795129	-0.270776	-1.28942	-0.57908	-0.929369	-0.911196	-0.200857	-0.551146
ENSMUSG00000039629	-1.32939	-0.410767	2.3018	0.00752505	0.345362	6	29917012	29959681	1	Strip2	striatin interacting protein 2 [Source:MGI Symbol;Acc:MGI:2444363]	4.46744	4.59302	4.97876	7.12733	6.17965	5.33877	4.67974	6.21525	-0.673912	-0.468075	-0.257059	-0.633919	-0.428082	-0.217066	-0.517574	-0.311737	-0.100721
ENSMUSG00000040723	-1.28727	-0.364313	4.19453	0.00755007	0.345362	1	165646516	165709757	-1	Rcsd1	RCSD domain containing 1 [Source:MGI Symbol;Acc:MGI:2676394]	12.4568	15.7746	16.3801	19.2329	21.1674	16.9514	14.8705	19.1172	-0.626639	-0.764906	-0.444463	-0.28597	-0.424236	-0.103794	-0.23163	-0.369896	-0.0494537
ENSMUSG00000095748	-1.44499	-0.531059	0.794944	0.00755319	0.345362	NA	NA	NA	NA	NA	NA	1.46551	0.855252	1.34427	2.44832	0	2.98609	1.22168	1.81147	-0.740389	#DIV/0!	-1.02686	-1.51737	#DIV/0!	-1.80384	-0.864973	#DIV/0!	-1.15144
ENSMUSG00000034438	-1.40454	-0.490102	1.25507	0.00761035	0.346733	5	105014150	105139540	-1	Gbp8	guanylate-binding protein 8 [Source:MGI Symbol;Acc:MGI:1923324]	2.10372	2.31235	1.74257	2.77476	2.79622	3.04642	2.05288	2.87247	-0.399424	-0.410538	-0.534174	-0.263006	-0.27412	-0.397756	-0.671149	-0.682263	-0.8059
ENSMUSG00000070323	1.33686	0.418846	1.94747	0.0077005	0.347121	9	7571396	7581885	1	Mmp27	matrix metallopeptidase 27 [Source:MGI Symbol;Acc:MGI:3039232]	5.50748	5.28989	5.30238	4.08053	4.33414	3.61951	5.36659	4.01139	0.432636	0.345647	0.605599	0.37448	0.287491	0.547444	0.377884	0.290895	0.550848
ENSMUSG00000087400	-1.44484	-0.530907	0.613471	0.007691	0.347121	10	24549441	24597108	-1	Gm15270	predicted gene 15270 [Source:MGI Symbol;Acc:MGI:3705149]	1.46551	1.14034	1.44384	2.04027	0.978677	2.92577	1.3499	1.98157	-0.477354	0.582498	-0.997413	-0.839299	0.220554	-1.35936	-0.498845	0.561008	-1.0189
ENSMUSG00000093846	-1.35865	-0.442173	1.89721	0.00769908	0.347121	12	22115756	22156646	-1	Gm4425	predicted gene 4425 [Source:MGI Symbol;Acc:MGI:3809660]	3.30922	2.91419	2.51428	3.91731	3.57916	4.40373	2.91256	3.96674	-0.243374	-0.113132	-0.412238	-0.426768	-0.296526	-0.595632	-0.63972	-0.509479	-0.808584
ENSMUSG00000070495	1.34915	0.432049	2.47481	0.00775722	0.348447	2	173093609	173119525	-1	Ctcfl	CCCTC-binding factor (zinc finger protein)-like [Source:MGI Symbol;Acc:MGI:3652571]	4.77473	3.73777	6.14877	2.77476	4.22229	3.9513	4.88709	3.64945	0.783054	0.177392	0.273092	0.429813	-0.17585	-0.0801492	1.14793	0.542272	0.637973
ENSMUSG00000026594	1.2879	0.365017	3.62728	0.00789949	0.353592	1	156804166	156939626	-1	Ralgps2	Ral GEF with PH domain and SH3 binding motif 2 [Source:MGI Symbol;Acc:MGI:1925505]	11.3695	17.3901	16.7038	11.9968	14.2887	8.89796	15.1545	11.7278	-0.0774737	-0.329702	0.353626	0.535622	0.283394	0.966722	0.477527	0.225299	0.908627
ENSMUSG00000031785	-1.55157	-0.633728	0.240985	0.00803903	0.35858	8	94974751	95014217	1	Adgrg1	adhesion G protein-coupled receptor G1 [Source:MGI Symbol;Acc:MGI:1340051]	0.756392	0.7919	0.84639	1.38738	0.978677	1.35732	0.798227	1.24112	-0.875157	-0.371698	-0.843549	-0.808974	-0.305515	-0.777366	-0.712969	-0.20951	-0.681361
ENSMUSG00000030657	-1.30623	-0.385411	2.9512	0.00821164	0.365003	7	117380979	117673580	1	Xylt1	xylosyltransferase 1 [Source:MGI Symbol;Acc:MGI:2451073]	5.72022	6.43023	8.09049	8.62352	9.19957	8.62649	6.74698	8.81653	-0.592208	-0.685496	-0.592704	-0.423408	-0.516696	-0.423905	-0.0920501	-0.185338	-0.0925466
ENSMUSG00000025934	1.36412	0.447975	1.56649	0.00826837	0.366249	1	21240589	21265661	1	Gsta3	glutathione S-transferase, alpha 3 [Source:MGI Symbol;Acc:MGI:95856]	3.38013	3.70609	3.51003	3.50926	2.01328	2.20187	3.53208	2.5748	-0.0540878	0.747531	0.618351	0.0787323	0.880351	0.751171	0.000317133	0.801936	0.672756
ENSMUSG00000036863	1.31711	0.397376	2.44673	0.00863661	0.378616	3	145987870	146021720	1	Syde2	synapse defective 1, Rho GTPase, homolog 2 (C. elegans) [Source:MGI Symbol;Acc:MGI:3036264]	5.93295	6.65196	7.16942	4.5702	5.64837	4.76568	6.58478	4.99475	0.376494	0.0709169	0.316067	0.541523	0.235946	0.481095	0.649601	0.344023	0.589173
ENSMUSG00000063450	-1.26335	-0.337255	6.81033	0.00861909	0.378616	12	75818134	76110926	1	Syne2	spectrin repeat containing, nuclear envelope 2 [Source:MGI Symbol;Acc:MGI:2449316]	104.879	90.53	108.238	142.737	123.453	117.483	101.216	127.891	-0.44464	-0.235244	-0.163735	-0.656892	-0.447496	-0.375987	-0.399148	-0.189752	-0.118243
ENSMUSG00000093606	-1.45442	-0.540446	0.673724	0.00861745	0.378616	16	87495999	87504033	1	B130034C11Rik	RIKEN cDNA B130034C11 gene [Source:MGI Symbol;Acc:MGI:3041186]	1.34732	1.36207	1.09533	1.82264	1.42607	2.29235	1.26824	1.84702	-0.435931	-0.0819505	-0.766734	-0.42023	-0.066249	-0.751032	-0.734665	-0.380684	-1.06547
ENSMUSG00000034220	1.27003	0.344864	5.07418	0.00874635	0.382114	1	92831645	92860779	1	Gpc1	glypican 1 [Source:MGI Symbol;Acc:MGI:1194891]	38.2215	37.9478	42.1701	32.9435	26.5361	33.7217	39.4465	31.0671	0.214389	0.526424	0.180703	0.204024	0.516059	0.170338	0.356228	0.668264	0.322543
ENSMUSG00000032348	-1.36113	-0.444801	1.71515	0.00878836	0.382639	9	78182774	78209349	1	Gsta4	glutathione S-transferase, alpha 4 [Source:MGI Symbol;Acc:MGI:1309515]	2.86011	2.28067	2.48938	3.67248	2.71233	4.07195	2.54339	3.48559	-0.360684	0.0765352	-0.509648	-0.687296	-0.250076	-0.83626	-0.560966	-0.123747	-0.709931
ENSMUSG00000003585	-1.36334	-0.447147	1.60837	0.00889087	0.38456	11	4097039	4123415	-1	Sec14l2	SEC14-like lipid binding 2 [Source:MGI Symbol;Acc:MGI:1915065]	2.69465	2.78749	2.38981	3.45485	2.85214	4.4339	2.62398	3.5803	-0.358527	-0.0819505	-0.718478	-0.309658	-0.0330821	-0.66961	-0.531729	-0.255153	-0.891681
ENSMUSG00000081756	-1.47398	-0.559721	0.34557	0.00889279	0.38456	11	64759717	64760027	-1	Gm12291	predicted gene 12291 [Source:MGI Symbol;Acc:MGI:3649312]	1.30005	1.07698	0.970859	2.12188	1.31422	1.50813	1.11596	1.64808	-0.706774	-0.0156443	-0.214193	-0.978344	-0.287214	-0.485763	-1.12801	-0.436877	-0.635425
ENSMUSG00000033721	1.29958	0.37804	2.91996	0.00904206	0.389694	3	109340653	109685698	1	Vav3	vav 3 oncogene [Source:MGI Symbol;Acc:MGI:1888518]	7.54029	10.6431	8.61326	6.66487	7.35406	6.51511	8.93223	6.84468	0.178043	0.0360784	0.210829	0.675274	0.53331	0.708061	0.369983	0.228019	0.40277
ENSMUSG00000027070	-1.43722	-0.523283	0.973899	0.00918197	0.394392	2	69424340	69586065	-1	Lrp2	low density lipoprotein receptor-related protein 2 [Source:MGI Symbol;Acc:MGI:95794]	1.82007	1.01363	0.995753	2.25789	1.34219	1.99073	1.27648	1.8636	-0.310985	0.439409	-0.129304	-1.15544	-0.405051	-0.973763	-1.18112	-0.430725	-0.999437
ENSMUSG00000018821	-1.31445	-0.394461	2.56419	0.00928591	0.39563	19	42123273	42129059	-1	Avpi1	arginine vasopressin-induced 1 [Source:MGI Symbol;Acc:MGI:1916784]	5.10565	5.09983	4.97876	6.66487	5.0332	8.2947	5.06142	6.66426	-0.384482	0.0206192	-0.700096	-0.386126	0.0189754	-0.70174	-0.420789	-0.0156872	-0.736403
ENSMUSG00000026628	-1.30208	-0.380813	2.77258	0.00930873	0.39563	1	191170296	191218039	-1	Atf3	activating transcription factor 3 [Source:MGI Symbol;Acc:MGI:109384]	7.16209	5.70168	5.57622	6.69207	8.44459	8.95828	6.14666	8.03165	0.0979276	-0.237646	-0.322841	-0.231067	-0.56664	-0.651835	-0.263167	-0.59874	-0.683935
ENSMUSG00000032380	1.54349	0.626195	-0.0633745	0.00936585	0.39563	9	66158223	66272242	1	Dapk2	death-associated protein kinase 2 [Source:MGI Symbol;Acc:MGI:1341297]	0.685481	1.39374	1.51852	0.707292	1.0346	0.542926	1.19925	0.761607	-0.0451906	-0.593888	0.33636	0.978587	0.42989	1.36014	1.10229	0.553594	1.48384
ENSMUSG00000032735	1.34629	0.428986	1.78063	0.00929367	0.39563	18	61799395	61911852	-1	Ablim3	actin binding LIM protein family, member 3 [Source:MGI Symbol;Acc:MGI:2442582]	3.85287	4.33961	4.28174	3.8629	2.85214	2.50349	4.15807	3.07285	-0.00375086	0.433888	0.621993	0.16788	0.605518	0.793623	0.148511	0.586149	0.774254
ENSMUSG00000033777	1.38552	0.470432	0.900641	0.00935198	0.39563	X	106143204	106160493	1	Tlr13	toll-like receptor 13 [Source:MGI Symbol;Acc:MGI:3045213]	1.77279	3.80112	1.84214	2.14908	2.04124	0.995365	2.47202	1.72856	-0.277694	-0.203421	0.832728	0.822705	0.896978	1.93313	-0.222334	-0.148061	0.888088
ENSMUSG00000064354	1.25687	0.329841	9.80983	0.00954516	0.401817	MT	7013	7696	1	mt-Co2	mitochondrially encoded cytochrome c oxidase II [Source:MGI Symbol;Acc:MGI:102503]	1073.56	1025.67	830.682	789.338	905.165	636.551	976.636	777.018	0.443684	0.246147	0.754052	0.377849	0.180313	0.688217	0.0736528	-0.123884	0.384021
ENSMUSG00000072653	-1.36812	-0.452195	1.42233	0.00957532	0.401817	6	47943171	47955913	1	Zfp783	zinc finger protein 783 [Source:MGI Symbol;Acc:MGI:3040704]	2.67101	2.15397	1.81725	2.74756	1.95735	4.46406	2.21408	3.05632	-0.0407644	0.448481	-0.74097	-0.351154	0.138091	-1.05136	-0.596394	-0.107149	-1.2966
ENSMUSG00000070427	1.26957	0.344341	4.38364	0.00970359	0.405865	7	102014885	102018690	-1	Il18bp	interleukin 18 binding protein [Source:MGI Symbol;Acc:MGI:1333800]	17.2788	32.1828	26.736	19.9674	22.8451	17.0418	25.3992	19.9515	-0.208641	-0.40288	0.0199245	0.688643	0.494404	0.917208	0.421135	0.226896	0.6497
ENSMUSG00000034855	1.2573	0.33033	7.31679	0.00977008	0.406813	5	92346638	92348889	-1	Cxcl10	chemokine (C-X-C motif) ligand 10 [Source:MGI Symbol;Acc:MGI:1352450]	185.411	263.893	200.619	131.039	220.873	164.899	216.641	172.271	0.500723	-0.252496	0.169144	1.00995	0.256731	0.678371	0.614459	-0.138759	0.28288
ENSMUSG00000078716	1.34694	0.429684	1.67188	0.00979005	0.406813	4	43668971	43692668	1	Tmem8b	transmembrane protein 8B [Source:MGI Symbol;Acc:MGI:2441680]	3.33285	4.14955	4.15727	2.80197	2.68437	3.13691	3.87989	2.87441	0.250319	0.312174	0.0874156	0.566517	0.628372	0.403614	0.569197	0.631052	0.406293
ENSMUSG00000032289	-1.50262	-0.587479	0.126485	0.00993187	0.411367	9	59966931	60522046	-1	Thsd4	thrombospondin, type I, domain containing 4 [Source:MGI Symbol;Acc:MGI:2672033]	0.661843	0.760224	1.1949	1.03373	1.42607	1.50813	0.872324	1.32265	-0.643304	-1.10749	-1.1882	-0.44337	-0.907551	-0.988263	0.209028	-0.255153	-0.335865
ENSMUSG00000026640	-1.25867	-0.331902	6.33024	0.0101069	0.416768	1	194618218	194816869	1	Plxna2	plexin A2 [Source:MGI Symbol;Acc:MGI:107684]	69.7299	59.7409	69.9267	84.4126	79.6923	86.9587	66.4659	83.6879	-0.275681	-0.192662	-0.318552	-0.498739	-0.415721	-0.54161	-0.271614	-0.188596	-0.314485
ENSMUSG00000033578	-1.28998	-0.367346	3.14962	0.0101276	0.416768	X	134295225	134305969	1	Tmem35a	transmembrane protein 35A [Source:MGI Symbol;Acc:MGI:1914814]	7.65847	7.95067	8.26475	9.03158	10.6536	11.13	7.95797	10.2717	-0.237921	-0.476212	-0.539323	-0.183901	-0.422192	-0.485303	-0.128007	-0.366298	-0.429409
ENSMUSG00000051920	1.50346	0.588286	0.175054	0.0102575	0.420753	15	43020811	43170818	-1	Rspo2	R-spondin 2 [Source:MGI Symbol;Acc:MGI:1922667]	1.25277	1.64715	0.746815	0.816106	1.09053	0.452438	1.21558	0.786357	0.618298	0.200103	1.46933	1.01314	0.594949	1.86418	-0.128007	-0.546202	0.723029
ENSMUSG00000020541	-1.30137	-0.380035	2.74782	0.0102919	0.420813	11	90643465	90688366	-1	Tom1l1	target of myb1-like 1 (chicken) [Source:MGI Symbol;Acc:MGI:1919193]	6.4057	4.65637	5.55132	6.66487	6.93463	8.14389	5.5378	7.2478	-0.0572208	-0.114462	-0.346363	-0.517371	-0.574612	-0.806513	-0.263745	-0.320987	-0.552887
ENSMUSG00000074657	-1.38146	-0.46619	1.25324	0.0104622	0.42641	10	127225696	127263348	-1	Kif5a	kinesin family member 5A [Source:MGI Symbol;Acc:MGI:109564]	2.19827	1.48877	1.84214	2.50273	1.95735	3.28772	1.84306	2.5826	-0.187135	0.167461	-0.580722	-0.749378	-0.394783	-1.14296	-0.442116	-0.0875199	-0.835702
ENSMUSG00000038011	-1.4395	-0.525566	0.831266	0.0105408	0.426887	5	124725085	124834308	1	Dnah10	dynein, axonemal, heavy chain 10 [Source:MGI Symbol;Acc:MGI:1860299]	1.34732	1.29872	1.2198	1.38738	1.45403	2.77496	1.28861	1.87212	-0.0422672	-0.109965	-1.04237	-0.0952785	-0.162976	-1.09538	-0.185722	-0.25342	-1.18582
ENSMUSG00000097324	-1.42229	-0.508219	0.890025	0.0105408	0.426887	18	61649625	61665537	-1	Carmn	cardiac mesoderm enhancer-associated non-coding RNA [Source:MGI Symbol;Acc:MGI:4439832]	1.82007	0.981956	1.04554	1.57781	1.28626	2.74479	1.28252	1.86962	0.206074	0.500809	-0.592704	-0.68419	-0.389454	-1.48297	-0.593671	-0.298935	-1.39245
ENSMUSG00000018008	1.48642	0.571846	0.149474	0.0106368	0.429409	15	78597047	78622019	1	Cyth4	cytohesin 4 [Source:MGI Symbol;Acc:MGI:2441702]	0.803667	1.96391	1.39405	0.84331	0.978677	0.904877	1.38721	0.908955	-0.0694654	-0.284235	-0.171124	1.21959	1.00482	1.11794	0.725152	0.510382	0.623493
ENSMUSG00000048636	1.35156	0.43462	1.60315	0.0107831	0.433945	6	92816478	92847174	1	A730049H05Rik	RIKEN cDNA A730049H05 gene [Source:MGI Symbol;Acc:MGI:1921766]	2.88375	3.73777	3.88344	2.2851	3.15973	2.29235	3.50165	2.57906	0.335688	-0.131857	0.331114	0.709921	0.242376	0.705346	0.765078	0.297533	0.760504
ENSMUSG00000039457	-1.28416	-0.360828	3.1317	0.0108432	0.434991	16	5086291	5132481	-1	Ppl	periplakin [Source:MGI Symbol;Acc:MGI:1194898]	10.4477	7.44386	6.77112	12.432	8.16496	11.1601	8.22088	10.5857	-0.25088	0.355663	-0.095175	-0.739939	-0.133396	-0.584234	-0.876594	-0.270052	-0.72089
ENSMUSG00000025993	1.37184	0.456112	1.2674	0.0109349	0.435396	1	45908068	45926523	-1	Slc40a1	solute carrier family 40 (iron-regulated transporter), member 1 [Source:MGI Symbol;Acc:MGI:1315204]	2.43464	3.1676	3.08683	2.12188	2.0692	2.11138	2.89636	2.10082	0.198366	0.234632	0.205521	0.578049	0.614314	0.585204	0.540787	0.577053	0.547942
ENSMUSG00000033213	1.3269	0.408058	1.88038	0.0109861	0.435396	2	122636986	122641191	1	AA467197	expressed sequence AA467197 [Source:MGI Symbol;Acc:MGI:3034182]	3.16739	6.20849	3.6096	3.074	3.52324	3.04642	4.3285	3.21455	0.0431783	-0.153606	0.0561816	1.01413	0.817341	1.02713	0.231723	0.0349389	0.244726
ENSMUSG00000063594	1.30464	0.383654	2.55038	0.0109241	0.435396	7	16891786	16895436	1	Gng8	guanine nucleotide binding protein (G protein), gamma 8 [Source:MGI Symbol;Acc:MGI:109163]	4.06561	7.69727	7.74198	5.73995	4.08248	5.03715	6.50162	4.95319	-0.497566	-0.00597501	-0.309136	0.423308	0.9149	0.611739	0.431665	0.923256	0.620095
ENSMUSG00000084824	-1.29093	-0.368405	3.07317	0.0109899	0.435396	18	32021740	32026610	1	Gm16344	predicted gene 16344 [Source:MGI Symbol;Acc:MGI:3840129]	7.89485	6.43023	6.27324	8.70514	7.38202	10.5871	6.8661	8.89141	-0.140956	0.096895	-0.423319	-0.436997	-0.199147	-0.719361	-0.472655	-0.234804	-0.755018
ENSMUSG00000083364	-1.2662	-0.340505	4.25451	0.0111834	0.441691	X	13218210	13218602	-1	Llph-ps2	LLP homolog, pseudogene 2 [Source:MGI Symbol;Acc:MGI:3642864]	20.5171	15.8063	15.9818	19.9946	20.3844	25.97	17.4351	22.1163	0.0372189	0.00936102	-0.340014	-0.33911	-0.366967	-0.716343	-0.323178	-0.351036	-0.700411
ENSMUSG00000026574	1.26409	0.338104	4.12703	0.011593	0.456456	1	164796644	164824266	1	Dpt	dermatopontin [Source:MGI Symbol;Acc:MGI:1928392]	10.2822	25.7526	27.3583	16.0501	24.1873	9.71234	21.131	16.6499	-0.642431	-1.2341	0.0822586	0.682135	0.0904668	1.40683	0.769398	0.177729	1.49409
ENSMUSG00000046714	1.26834	0.342943	4.11802	0.0117467	0.461084	8	121116171	121118895	1	Foxc2	forkhead box C2 [Source:MGI Symbol;Acc:MGI:1347481]	19.8553	17.6752	20.1142	14.2003	16.4418	14.84	19.2149	15.1607	0.483608	0.272158	0.420035	0.31581	0.104361	0.252238	0.502299	0.290849	0.438726
ENSMUSG00000021209	-1.51916	-0.60327	0.0818984	0.0118356	0.46258	12	103532283	103613831	1	Ppp4r4	protein phosphatase 4, regulatory subunit 4 [Source:MGI Symbol;Acc:MGI:1921771]	0.732755	0.7919	0.84639	1.19696	1.28626	1.11601	0.790348	1.19974	-0.707967	-0.811781	-0.606953	-0.595981	-0.699794	-0.494966	-0.499976	-0.603789	-0.398962
ENSMUSG00000035258	1.32558	0.406626	1.93709	0.0118573	0.46258	16	56477846	56690128	1	Abi3bp	ABI gene family, member 3 (NESH) binding protein [Source:MGI Symbol;Acc:MGI:2444583]	3.75832	5.13151	4.72983	2.25789	4.89339	3.07658	4.53989	3.40929	0.735112	-0.380743	0.288762	1.18441	0.0685505	0.738055	1.06681	-0.0490458	0.620459
ENSMUSG00000041020	-1.28402	-0.360668	3.17833	0.011925	0.463804	X	159414572	159498757	1	Map7d2	MAP7 domain containing 2 [Source:MGI Symbol;Acc:MGI:1917474]	7.72938	6.65196	8.81241	10.3646	10.374	9.10909	7.73125	9.94921	-0.423232	-0.424544	-0.236954	-0.639807	-0.641118	-0.453529	-0.234049	-0.23536	-0.0477703
ENSMUSG00000091993	-1.31911	-0.399566	2.17208	0.0119794	0.464501	1	171500568	171504111	-1	B930036N10Rik	RIKEN cDNA B930036N10 gene [Source:MGI Symbol;Acc:MGI:3702496]	4.34926	4.02285	2.98726	5.82156	3.01992	6.15316	3.78646	4.99821	-0.420637	0.526259	-0.500559	-0.533187	0.413709	-0.61311	-0.962583	-0.0156872	-1.04251
ENSMUSG00000084790	-1.29659	-0.374727	2.69923	0.012093	0.467487	16	4032839	4037847	-1	Gm15879	predicted gene 15879 [Source:MGI Symbol;Acc:MGI:3802012]	6.28751	6.65196	4.75472	9.00437	4.13841	9.77267	5.89806	7.63848	-0.518137	0.603414	-0.636264	-0.436847	0.684704	-0.554974	-0.921266	0.200285	-1.03939
ENSMUSG00000096010	-1.42327	-0.50921	0.722042	0.0121322	0.467586	6	136801553	136804415	-1	Hist4h4	histone cluster 4, H4 [Source:MGI Symbol;Acc:MGI:2448443]	1.48915	1.01363	1.1949	1.60501	1.42607	2.32252	1.23256	1.78453	-0.108095	0.0624394	-0.641203	-0.663048	-0.492514	-1.19616	-0.425688	-0.255153	-0.958795
ENSMUSG00000027939	-1.3295	-0.410882	1.8632	0.0121713	0.467678	3	90104132	90212048	1	Nup210l	nucleoporin 210-like [Source:MGI Symbol;Acc:MGI:1924845]	3.87651	2.56576	2.53917	4.05333	2.88011	5.12764	2.99381	4.02036	-0.0643484	0.428636	-0.403535	-0.659724	-0.166739	-0.99891	-0.67475	-0.181765	-1.01394
ENSMUSG00000038418	-1.25386	-0.326378	5.33205	0.0122082	0.467687	18	34859823	34864984	1	Egr1	early growth response 1 [Source:MGI Symbol;Acc:MGI:95295]	62.0005	22.8384	22.2302	22.2797	88.6122	23.6474	35.6897	44.8465	1.47655	-0.515225	1.3906	0.0357307	-1.95604	-0.0502237	-0.00321024	-1.99499	-0.0891646
ENSMUSG00000085939	-1.42987	-0.515889	0.6952	0.0122823	0.469118	18	50134726	50135600	1	Cd63-ps	CD63 antigen, pseudogene [Source:MGI Symbol;Acc:MGI:105972]	1.2055	1.29872	1.31937	1.90425	1.31422	2.26219	1.27453	1.82689	-0.65959	-0.124579	-0.908089	-0.552136	-0.0171253	-0.800636	-0.52937	0.00564133	-0.777869
ENSMUSG00000019528	1.2515	0.323654	5.98887	0.0123336	0.469671	3	20122084	20155317	-1	Gyg	glycogenin [Source:MGI Symbol;Acc:MGI:1351614]	70.0608	78.0813	74.5321	64.418	58.413	55.0467	74.2248	59.2926	0.121144	0.262318	0.347953	0.277513	0.418687	0.504322	0.210398	0.351571	0.437207
ENSMUSG00000018865	-1.36608	-0.450045	1.28762	0.012688	0.478879	15	84076097	84105754	-1	Sult4a1	sulfotransferase family 4A, member 1 [Source:MGI Symbol;Acc:MGI:1888971]	2.64737	1.48877	1.51852	2.77476	1.81754	3.25756	1.88489	2.61662	-0.0678023	0.542572	-0.299229	-0.898242	-0.287867	-1.12967	-0.869695	-0.259321	-1.10112
ENSMUSG00000045867	1.32266	0.403446	2.03992	0.0126364	0.478879	10	95174746	95324133	-1	Cradd	CASP2 and RIPK1 domain containing adaptor with death domain [Source:MGI Symbol;Acc:MGI:1336168]	4.01833	4.94145	4.23195	3.64528	3.60712	2.65431	4.39725	3.30224	0.14057	0.155748	0.598263	0.438908	0.454087	0.896601	0.215295	0.230473	0.672988
ENSMUSG00000050103	1.39683	0.482157	0.952677	0.0126689	0.478879	12	37241641	37582202	1	Agmo	alkylglycerol monooxygenase [Source:MGI Symbol;Acc:MGI:2442495]	1.46551	2.75581	2.09108	1.22416	2.26494	0.935039	2.10413	1.47471	0.259611	-0.628069	0.648304	1.17069	0.283005	1.55938	0.772457	-0.115223	1.16115
ENSMUSG00000082229	-1.45208	-0.538117	0.403218	0.0128621	0.484016	X	103184176	103186640	-1	Nap1l2	nucleosome assembly protein 1-like 2 [Source:MGI Symbol;Acc:MGI:106654]	1.34732	0.7919	0.921071	1.30577	1.59385	1.62878	1.0201	1.50946	0.0451956	-0.242415	-0.273694	-0.721511	-1.00912	-1.0404	-0.503516	-0.791127	-0.822405
ENSMUSG00000003452	-1.27243	-0.347586	3.47783	0.013044	0.484376	6	149408886	149563329	1	Bicd1	bicaudal D homolog 1 (Drosophila) [Source:MGI Symbol;Acc:MGI:1101760]	9.78583	9.94626	10.4056	10.3918	15.1835	12.7889	10.0459	12.7881	-0.0866738	-0.633737	-0.38613	-0.0632132	-0.610276	-0.362669	0.00192334	-0.54514	-0.297532
ENSMUSG00000032281	-1.36158	-0.445285	1.41844	0.0130615	0.484376	9	54604877	54661870	-1	Acsbg1	acyl-CoA synthetase bubblegum family member 1 [Source:MGI Symbol;Acc:MGI:2385656]	2.15099	1.5838	2.19066	3.23722	2.01328	2.89561	1.97515	2.71537	-0.589755	0.0954544	-0.428864	-1.03137	-0.346157	-0.870476	-0.563393	0.121816	-0.402502
ENSMUSG00000038235	-1.25997	-0.333386	4.23451	0.0129927	0.484376	1	171437535	171464603	1	F11r	F11 receptor [Source:MGI Symbol;Acc:MGI:1321398]	19.5244	15.4262	17.0523	20.3755	18.3432	26.9352	17.3343	21.8846	-0.0615558	0.0900308	-0.464214	-0.401449	-0.249862	-0.804108	-0.256869	-0.105282	-0.659527
ENSMUSG00000044350	1.25997	0.333386	4.36181	0.0129623	0.484376	14	77024200	77036904	-1	Lacc1	laccase (multicopper oxidoreductase) domain containing 1 [Source:MGI Symbol;Acc:MGI:2445077]	23.59	24.5489	23.4251	18.4984	19.4337	18.8516	23.8547	18.9279	0.350773	0.279612	0.323488	0.408256	0.337095	0.380971	0.340653	0.269491	0.313367
ENSMUSG00000097289	-1.37343	-0.457785	1.13272	0.0129439	0.484376	11	96712982	96747436	-1	2010300F17Rik	RIKEN cDNA 2010300F17 gene [Source:MGI Symbol;Acc:MGI:1917134]	2.2219	1.48877	1.46874	2.14908	1.98532	3.07658	1.72647	2.40366	0.0480762	0.162427	-0.469533	-0.529597	-0.415247	-1.04721	-0.549145	-0.434794	-1.06675
ENSMUSG00000056880	-1.55404	-0.636024	-0.362108	0.0131517	0.484902	9	115909455	116076176	1	Gadl1	glutamate decarboxylase-like 1 [Source:MGI Symbol;Acc:MGI:1920998]	0.661843	0.760224	0.572558	1.11535	0.335546	1.65894	0.664875	1.03661	-0.752929	0.979977	-1.3257	-0.552995	1.17991	-1.12577	-0.961997	0.770909	-1.53477
ENSMUSG00000098168	-1.27508	-0.350583	3.53609	0.0131411	0.484902	NA	NA	NA	NA	NA	NA	8.53305	8.0457	10.4803	12.7857	13.7294	7.99308	9.01968	11.5027	-0.583394	-0.686139	0.0943104	-0.668237	-0.770983	0.00946684	-0.286847	-0.389593	0.390857
ENSMUSG00000045275	1.50312	0.58796	0.0869829	0.0134249	0.48932	16	96158407	96192257	-1	Lca5l	Leber congenital amaurosis 5-like [Source:MGI Symbol;Acc:MGI:3041157]	1.3946	1.4571	0.84639	0.897717	0.894791	0.633414	1.23269	0.80864	0.635517	0.640228	1.13863	0.698763	0.703474	1.20188	-0.0849382	-0.0802274	0.418174
ENSMUSG00000050069	-1.35819	-0.441683	1.45896	0.0134181	0.48932	1	174833785	174921819	-1	Grem2	gremlin 2, DAN family BMP antagonist [Source:MGI Symbol;Acc:MGI:1344367]	3.07284	1.14034	1.26958	2.82917	1.78958	3.01626	1.82759	2.545	0.119196	0.779953	0.0268155	-1.31092	-0.650163	-1.4033	-1.15602	-0.495265	-1.2484
ENSMUSG00000092341	-1.24377	-0.314714	10.7052	0.0133329	0.48932	19	5795690	5802672	-1	Malat1	metastasis associated lung adenocarcinoma transcript 1 (non-coding RNA) [Source:MGI Symbol;Acc:MGI:1919539]	1600.36	1094.88	1198.02	1705.64	1106.13	2030.72	1297.75	1614.16	-0.0919119	0.532878	-0.343597	-0.639536	-0.014746	-0.891221	-0.509663	0.115127	-0.761348
ENSMUSG00000092368	-1.39011	-0.475194	1.05257	0.013414	0.48932	17	35994453	36038435	1	A930015D03Rik	RIKEN cDNA A930015D03 gene [Source:MGI Symbol;Acc:MGI:1925060]	1.44187	1.90056	1.71767	2.44832	2.0692	2.47333	1.6867	2.33028	-0.763848	-0.521131	-0.778511	-0.365368	-0.122651	-0.380031	-0.511336	-0.268619	-0.525999
ENSMUSG00000025069	-1.28368	-0.360284	2.81542	0.0135549	0.49265	19	47865545	47886324	1	Gsto2	glutathione S-transferase omega 2 [Source:MGI Symbol;Acc:MGI:1915464]	7.70575	5.09983	5.45175	6.9369	6.2915	10.3759	6.08578	7.86811	0.151643	0.292532	-0.429233	-0.443842	-0.302953	-1.02472	-0.347573	-0.206684	-0.928449
ENSMUSG00000034463	1.25166	0.323838	5.15141	0.0136059	0.493099	14	65919395	65953744	-1	Scara3	scavenger receptor class A, member 3 [Source:MGI Symbol;Acc:MGI:2444418]	35.1722	41.9073	43.8131	32.345	33.1073	31.0976	40.2976	32.1833	0.120894	0.0872902	0.177634	0.373659	0.340056	0.430399	0.43782	0.404216	0.49456
ENSMUSG00000038175	1.26681	0.341196	3.58313	0.013726	0.49604	13	45389742	45412022	1	Mylip	myosin regulatory light chain interacting protein [Source:MGI Symbol;Acc:MGI:2388271]	12.6223	16.1548	13.5671	11.3167	11.2688	10.768	14.1147	11.1178	0.157524	0.163645	0.22922	0.513509	0.519629	0.585204	0.261666	0.267786	0.333361
ENSMUSG00000064351	1.24233	0.31305	11.842	0.01379	0.496946	MT	5328	6872	1	mt-Co1	mitochondrially encoded cytochrome c oxidase I [Source:MGI Symbol;Acc:MGI:102504]	4200.6	4041.1	3525.06	3322.4	3232.77	2916.33	3922.25	3157.16	0.338372	0.377827	0.526443	0.282522	0.321977	0.470594	0.0854256	0.124881	0.273497
ENSMUSG00000082908	1.37859	0.46319	1.11382	0.0141054	0.506744	2	87526145	87526397	1	Gm13736	predicted gene 13736 [Source:MGI Symbol;Acc:MGI:3650137]	2.19827	2.40738	2.56406	2.47552	0.75498	1.96057	2.3899	1.73036	-0.171368	1.54186	0.165095	-0.0402722	1.67295	0.29619	0.0506989	1.76392	0.387162
ENSMUSG00000085811	-1.27573	-0.351319	3.26269	0.0141413	0.506744	11	108820333	108826942	1	Cep112it	centrosomal protein 112, intronic transcript [Source:MGI Symbol;Acc:MGI:3649867]	9.17126	6.55693	6.62176	9.87489	7.77349	10.9792	7.44998	9.54252	-0.106645	0.238557	-0.259578	-0.590744	-0.245543	-0.743677	-0.57655	-0.231349	-0.729483
ENSMUSG00000082765	1.462	0.547944	0.0832699	0.0142923	0.510719	2	177125463	177127709	-1	Gm14411	predicted gene 14411 [Source:MGI Symbol;Acc:MGI:3649821]	1.25277	1.4571	1.6181	0.761699	1.34219	0.844552	1.44266	0.982812	0.717834	-0.0994573	0.568869	0.935802	0.118511	0.786838	1.08701	0.269715	0.938042
ENSMUSG00000001435	-1.25451	-0.32712	4.50758	0.0143616	0.511761	10	77052178	77166548	-1	Col18a1	collagen, type XVIII, alpha 1 [Source:MGI Symbol;Acc:MGI:88451]	19.6426	21.3813	22.0808	28.999	24.8304	25.3064	21.0349	26.3786	-0.562019	-0.338126	-0.365518	-0.439653	-0.215761	-0.243153	-0.393208	-0.169316	-0.196708
ENSMUSG00000093514	-1.24834	-0.320015	5.1991	0.014427	0.51266	17	70853767	70875965	1	Gm28727	predicted gene 28727 [Source:MGI Symbol;Acc:MGI:5579433]	33.8958	36.269	38.4112	52.4756	24.4949	58.6059	36.192	45.1921	-0.63054	0.468627	-0.789937	-0.532911	0.566256	-0.692308	-0.450122	0.649045	-0.609519
ENSMUSG00000044646	1.25622	0.329089	4.09555	0.014563	0.516056	18	75820178	76148561	1	Zbtb7c	zinc finger and BTB domain containing 7C [Source:MGI Symbol;Acc:MGI:2443302]	17.0897	22.7117	24.0474	16.839	18.9025	15.021	21.283	16.9208	0.0213243	-0.145443	0.186154	0.431629	0.264861	0.596458	0.514077	0.34731	0.678906
ENSMUSG00000015134	-1.26979	-0.344594	3.4361	0.0146808	0.51879	7	66390890	66427517	-1	Aldh1a3	aldehyde dehydrogenase family 1, subfamily A3 [Source:MGI Symbol;Acc:MGI:1861722]	9.4549	8.36246	9.01156	14.0914	7.74553	12.2762	8.94298	11.371	-0.575684	0.287699	-0.376725	-0.752819	0.110564	-0.55386	-0.644969	0.218413	-0.44601
ENSMUSG00000044937	-1.40484	-0.490402	0.828924	0.0148584	0.523615	10	86705811	86776844	1	Ttc41	tetratricopeptide repeat domain 41 [Source:MGI Symbol;Acc:MGI:2387653]	1.48915	1.01363	1.36916	1.74103	1.84551	1.9304	1.29065	1.83898	-0.225452	-0.309529	-0.374416	-0.780405	-0.864483	-0.929369	-0.346647	-0.430725	-0.495611
ENSMUSG00000089672	1.32742	0.408622	1.55064	0.0149158	0.52419	NA	NA	NA	NA	NA	NA	2.83647	5.13151	2.61385	2.33951	2.82418	2.68447	3.52728	2.61605	0.277894	0.00626391	0.0794611	1.13318	0.86155	0.934747	0.159974	-0.111656	-0.0384591
ENSMUSG00000063388	1.25223	0.324498	4.39135	0.0151443	0.530758	18	60441753	60442983	1	BC023105	cDNA sequence BC023105 [Source:MGI Symbol;Acc:MGI:2384767]	18.8625	29.0786	22.8774	17.0022	24.3271	15.0813	23.6062	18.8035	0.149801	-0.367042	0.322765	0.774233	0.25739	0.947197	0.428202	-0.0886408	0.601166
ENSMUSG00000021367	-1.26261	-0.336406	3.76348	0.0152385	0.53114	13	42301476	42307990	1	Edn1	endothelin 1 [Source:MGI Symbol;Acc:MGI:95283]	12.7405	12.5754	9.90774	12.16	18.7067	13.5732	11.7412	14.8133	0.0672785	-0.554136	-0.0913358	0.0484591	-0.572956	-0.110155	-0.295513	-0.916928	-0.454128
ENSMUSG00000081094	-1.34422	-0.426767	1.20496	0.0152148	0.53114	8	19492936	19493526	1	Rpl19-ps11	ribosomal protein L19, pseudogene 11 [Source:MGI Symbol;Acc:MGI:3642193]	2.6001	1.42542	1.66789	1.5234	1.45403	4.88634	1.8978	2.62126	0.771273	0.838505	-0.910186	-0.0959069	-0.028675	-1.77737	0.130727	0.197959	-1.55073
ENSMUSG00000085008	-1.32223	-0.402976	1.90054	0.0152992	0.531802	2	27144898	27162703	-1	Dbhos	dopamine beta hydroxylase, opposite strand [Source:MGI Symbol;Acc:MGI:3652314]	3.75832	3.04089	2.4147	5.19588	2.43271	4.58471	3.07131	4.0711	-0.467278	0.627524	-0.286741	-0.772871	0.321931	-0.592334	-1.10552	-0.0107209	-0.924986
ENSMUSG00000031488	-1.279	-0.355021	2.80626	0.0153452	0.531953	8	27138773	27174646	-1	Rab11fip1	RAB11 family interacting protein 1 (class I) [Source:MGI Symbol;Acc:MGI:1923017]	7.13845	5.98676	5.60111	7.45377	7.21425	9.35039	6.24211	8.00614	-0.0623592	-0.0152377	-0.389416	-0.316195	-0.269073	-0.643251	-0.412258	-0.365136	-0.739314
ENSMUSG00000041324	-1.23934	-0.309576	7.54703	0.0154432	0.533899	13	16011851	16031621	1	Inhba	inhibin beta-A [Source:MGI Symbol;Acc:MGI:96570]	203.21	136.46	150.209	191.323	193.079	222.901	163.293	202.434	0.0869612	0.0737767	-0.133437	-0.487527	-0.500712	-0.707925	-0.349032	-0.362217	-0.569431
ENSMUSG00000097727	-1.35466	-0.437929	1.51287	0.0155888	0.537475	17	45734506	45788594	1	F630040K05Rik	RIKEN cDNA F630040K05 gene [Source:MGI Symbol;Acc:MGI:4437734]	2.0328	1.99559	2.04129	2.42112	2.5166	3.31788	2.02323	2.75187	-0.252201	-0.308004	-0.706791	-0.278859	-0.334662	-0.733449	-0.246188	-0.301991	-0.700779
ENSMUSG00000062694	-1.53204	-0.61545	-0.114227	0.0158289	0.544282	6	112459505	112472872	1	Cav3	caveolin 3 [Source:MGI Symbol;Acc:MGI:107570]	0.496382	0.823576	0.796602	1.19696	1.11849	0.874714	0.70552	1.06339	-1.26985	-1.17203	-0.81736	-0.539397	-0.441577	-0.0869106	-0.587439	-0.489618	-0.134952
ENSMUSG00000042485	-1.29342	-0.371192	2.49548	0.0159304	0.546301	14	30879257	30881608	1	Mustn1	musculoskeletal, embryonic nuclear protein 1 [Source:MGI Symbol;Acc:MGI:1913425]	4.49108	4.65637	4.90408	6.69207	5.0332	6.45479	4.68384	6.06002	-0.575391	-0.164413	-0.523307	-0.523247	-0.112269	-0.471164	-0.44847	-0.0374915	-0.396386
ENSMUSG00000028078	-1.385	-0.469888	0.920733	0.0160936	0.548603	3	86786151	86920852	-1	Dclk2	doublecortin-like kinase 2 [Source:MGI Symbol;Acc:MGI:1918012]	1.48915	1.4571	1.56831	1.84984	1.84551	2.59398	1.50485	2.09644	-0.312915	-0.309529	-0.800681	-0.344306	-0.340921	-0.832072	-0.23819	-0.234804	-0.725956
ENSMUSG00000030494	-1.46456	-0.550465	0.213229	0.0162555	0.548603	7	35334170	35392289	1	Rhpn2	rhophilin, Rho GTPase binding protein 2 [Source:MGI Symbol;Acc:MGI:1289234]	1.04004	0.823576	0.896178	1.68662	1.31422	1.05569	0.919931	1.35218	-0.697497	-0.337572	-0.0215475	-1.03416	-0.674238	-0.358213	-0.912278	-0.552354	-0.236329
ENSMUSG00000040165	-1.2991	-0.377516	2.3141	0.0161947	0.548603	8	3940222	3954746	-1	Cd209c	CD209c antigen [Source:MGI Symbol;Acc:MGI:2157945]	4.70382	3.64274	3.68429	5.90317	3.88675	5.91186	4.01028	5.23393	-0.327659	0.275268	-0.329781	-0.696466	-0.0935394	-0.698589	-0.680105	-0.077178	-0.682228
ENSMUSG00000041912	-1.28158	-0.357927	2.72529	0.0162253	0.548603	3	94413273	94434668	1	Tdrkh	tudor and KH domain containing protein [Source:MGI Symbol;Acc:MGI:1919884]	6.45297	5.28989	4.4311	6.09359	5.8441	8.86779	5.39132	6.93516	0.0826703	0.142983	-0.458611	-0.204056	-0.143743	-0.745337	-0.459628	-0.399316	-1.00091
ENSMUSG00000042834	1.23877	0.308907	6.46251	0.0162034	0.548603	18	33437019	33464029	-1	Nrep	neuronal regeneration related protein [Source:MGI Symbol;Acc:MGI:99444]	92.8944	122.396	125.813	85.2559	122.139	67.8658	113.701	91.7535	0.123792	-0.394859	0.452908	0.521685	0.00303381	0.850801	0.561414	0.0427625	0.89053
ENSMUSG00000090631	-1.4348	-0.52085	0.30634	0.0162555	0.548603	6	42486163	42487214	-1	Olfr456	olfactory receptor 456 [Source:MGI Symbol;Acc:MGI:3030290]	1.18186	0.601844	0.970859	1.30577	0.838866	1.9304	0.918189	1.35835	-0.143838	0.49455	-0.70784	-1.11744	-0.479052	-1.68144	-0.427567	0.210821	-0.991569
ENSMUSG00000033705	-1.25357	-0.326042	4.10149	0.0163681	0.548841	2	120629126	120731895	1	Stard9	START domain containing 9 [Source:MGI Symbol;Acc:MGI:3045258]	15.7661	13.8741	14.6127	18.9065	16.7494	19.8771	14.7509	18.511	-0.262058	-0.0872844	-0.334288	-0.446487	-0.271714	-0.518717	-0.371659	-0.196886	-0.443889
ENSMUSG00000060377	-1.2453	-0.316489	4.91488	0.0163556	0.548841	14	98993980	98994300	-1	Rpl36a-ps1	ribosomal protein L36A, pseudogene 1 [Source:MGI Symbol;Acc:MGI:3642585]	28.6011	27.6531	29.7979	36.5072	40.0978	30.5547	28.684	35.7199	-0.35211	-0.487453	-0.0953232	-0.400736	-0.53608	-0.14395	-0.292968	-0.428312	-0.0361822
ENSMUSG00000097017	-1.35514	-0.438441	1.21127	0.0163916	0.548841	7	25816654	25820654	1	Gm26707	predicted gene, 26707 [Source:MGI Symbol;Acc:MGI:5477201]	1.98553	1.36207	1.91682	2.72035	1.76162	2.74479	1.75481	2.40892	-0.454271	0.172622	-0.467173	-0.997997	-0.371104	-1.0109	-0.505077	0.121816	-0.517979
ENSMUSG00000020387	1.24503	0.316184	5.34554	0.0164589	0.549042	11	51813455	51857653	-1	Jade2	jade family PHD finger 2 [Source:MGI Symbol;Acc:MGI:1924151]	41.9798	33.1964	38.3614	34.1405	23.0129	34.1139	37.8459	30.4224	0.298212	0.867252	0.299337	-0.0404538	0.528586	-0.0393295	0.168173	0.737212	0.169297
ENSMUSG00000090077	1.36979	0.453952	1.22572	0.0164837	0.549042	2	181380078	181383628	1	Lime1	Lck interacting transmembrane adaptor 1 [Source:MGI Symbol;Acc:MGI:1919949]	3.09648	1.93224	2.813	2.50273	0.419433	2.89561	2.61391	1.93926	0.307129	2.88412	0.0967644	-0.37323	2.20376	-0.583594	0.16861	2.7456	-0.0417547
ENSMUSG00000032332	-1.23556	-0.305168	8.60662	0.0166904	0.554477	9	79598991	79718831	-1	Col12a1	collagen, type XII, alpha 1 [Source:MGI Symbol;Acc:MGI:88448]	336.902	258.349	300.444	417.71	323.663	365.419	298.565	368.931	-0.310175	0.0578382	-0.117225	-0.69318	-0.325167	-0.50023	-0.475409	-0.107396	-0.282459
ENSMUSG00000074918	1.24425	0.315279	4.95835	0.016739	0.554646	2	118745758	118748810	1	Inafm2	InaF motif containing 2 [Source:MGI Symbol;Acc:MGI:1915354]	32.5249	37.1559	35.9218	25.5169	33.9741	25.3366	35.2009	28.2759	0.350089	-0.062891	0.360323	0.542138	0.129158	0.552372	0.493405	0.0804247	0.503639
ENSMUSG00000022479	-1.24005	-0.310397	6.13437	0.0168103	0.555568	15	97854425	97910630	-1	Vdr	vitamin D receptor [Source:MGI Symbol;Acc:MGI:103076]	46.8963	46.2153	53.223	63.7107	54.3585	63.4319	48.7782	60.5004	-0.442061	-0.213031	-0.435733	-0.463166	-0.234137	-0.456838	-0.259486	-0.0304566	-0.253158
ENSMUSG00000073617	1.27092	0.345868	3.08889	0.0168947	0.556915	NA	NA	NA	NA	NA	NA	8.95852	9.6295	8.91199	7.04572	7.71757	6.8469	9.16667	7.2034	0.346514	0.215114	0.387809	0.450714	0.319315	0.49201	0.339001	0.207601	0.380296
ENSMUSG00000026770	-1.40297	-0.488488	0.820873	0.0170835	0.561686	2	11642807	11693193	1	Il2ra	interleukin 2 receptor, alpha chain [Source:MGI Symbol;Acc:MGI:96549]	1.37096	1.07698	1.17001	1.38738	1.0346	2.74479	1.20598	1.72226	-0.0171762	0.406112	-1.00151	-0.365368	0.0579211	-1.3497	-0.245843	0.177445	-1.23018
ENSMUSG00000017607	-1.37806	-0.462634	0.77833	0.0171927	0.563822	11	99065678	99089306	-1	Tns4	tensin 4 [Source:MGI Symbol;Acc:MGI:2144377]	1.79643	1.33039	1.24469	2.69315	1.28626	2.08122	1.45717	2.02021	-0.584161	0.48195	-0.212293	-1.01744	0.048667	-0.645576	-1.11351	-0.047396	-0.741639
ENSMUSG00000010651	1.4798	0.565399	0.132397	0.0173176	0.564979	9	119148023	119157093	-1	Acaa1b	acetyl-Coenzyme A acyltransferase 1B [Source:MGI Symbol;Acc:MGI:3605455]	0.921853	1.17201	1.39405	1.14255	0.782942	0.392113	1.16264	0.772535	-0.309647	0.235632	1.23327	0.0367308	0.58201	1.57964	0.287031	0.83231	1.82994
ENSMUSG00000042644	-1.2423	-0.313015	5.03469	0.0173472	0.564979	17	27057304	27122223	1	Itpr3	inositol 1,4,5-triphosphate receptor 3 [Source:MGI Symbol;Acc:MGI:96624]	32.4067	25.9743	27.5575	38.3026	29.612	38.9399	28.6462	35.6181	-0.241151	0.130111	-0.264957	-0.560357	-0.189095	-0.584162	-0.474999	-0.103738	-0.498805
ENSMUSG00000054588	1.24273	0.313507	4.51254	0.0173608	0.564979	NA	NA	NA	NA	NA	NA	19.7844	39.4049	27.3583	21.9805	36.7703	10.6172	28.8492	23.1227	-0.15186	-0.894178	0.897956	0.842154	0.0998353	1.89197	0.315757	-0.426562	1.36557
ENSMUSG00000031636	1.25858	0.331801	3.03445	0.0176044	0.57	8	45885461	45919548	1	Pdlim3	PDZ and LIM domain 3 [Source:MGI Symbol;Acc:MGI:1859274]	6.00386	12.9238	14.6127	10.1469	11.7441	4.58471	11.1801	8.82525	-0.757079	-0.967976	0.389061	0.348988	0.138091	1.49513	0.526178	0.315281	1.67232
ENSMUSG00000052516	-1.26462	-0.338705	3.01485	0.0175756	0.57	16	73892306	74411825	-1	Robo2	roundabout guidance receptor 2 [Source:MGI Symbol;Acc:MGI:1890110]	8.10758	8.29911	8.96178	9.9565	13.4219	8.68682	8.45616	10.6884	-0.296367	-0.727241	-0.0995563	-0.262682	-0.693556	-0.0658713	-0.151854	-0.582728	0.0449569
ENSMUSG00000029490	1.4235	0.509439	0.477412	0.0177296	0.571153	5	108441054	108448891	-1	Mfsd7a	major facilitator superfamily domain containing 7A [Source:MGI Symbol;Acc:MGI:2442629]	1.11095	1.77386	1.89193	1.19696	0.866828	1.26683	1.59225	1.1102	-0.107575	0.357977	-0.189425	0.567518	1.03307	0.485668	0.660489	1.12604	0.578639
ENSMUSG00000052105	-1.2479	-0.319505	4.23803	0.0177253	0.571153	17	66336982	66449750	-1	Mtcl1	microtubule crosslinking factor 1 [Source:MGI Symbol;Acc:MGI:1915867]	17.7752	13.3673	16.5046	18.1176	18.5949	22.8934	15.8824	19.8686	-0.0275214	-0.0650369	-0.365063	-0.438684	-0.4762	-0.776226	-0.13452	-0.172036	-0.472062
ENSMUSG00000085950	-1.34002	-0.422258	1.48849	0.017822	0.572684	2	38424002	38455851	1	Gm13589	predicted gene 13589 [Source:MGI Symbol;Acc:MGI:3649991]	2.45828	1.52045	1.71767	2.36671	2.0692	3.31788	1.8988	2.5846	0.0547643	0.248571	-0.432616	-0.638386	-0.444579	-1.12577	-0.462426	-0.268619	-0.949806
ENSMUSG00000074344	-1.42233	-0.508258	0.345552	0.0179672	0.575898	3	105870903	105924042	1	Tmigd3	transmembrane and immunoglobulin domain containing 3 [Source:MGI Symbol;Acc:MGI:5604098]	0.969128	1.48877	1.14512	2.14908	1.00664	1.90024	1.20101	1.68532	-1.14896	-0.0547882	-0.971424	-0.529597	0.564575	-0.35206	-0.908226	0.185947	-0.730689
ENSMUSG00000070713	1.47037	0.556175	0.411726	0.0183873	0.587885	8	72304110	72305260	-1	Gm10282	predicted pseudogene 10282 [Source:MGI Symbol;Acc:MGI:3704312]	0	1.17201	2.21555	1.11535	0.391471	0.754064	1.12919	0.753627	#NUM!	#NUM!	#NUM!	0.0714962	1.58201	0.636228	0.990174	2.50069	1.55491
ENSMUSG00000064345	1.23047	0.299211	9.00082	0.0188129	0.599932	MT	3914	4951	1	mt-Nd2	mitochondrially encoded NADH dehydrogenase 2 [Source:MGI Symbol;Acc:MGI:102500]	600.197	586.259	469.224	382.237	586.675	376.61	551.893	448.507	0.650969	0.0328754	0.672367	0.617071	-0.00102286	0.638468	0.295808	-0.322286	0.317205
ENSMUSG00000082348	1.37486	0.459289	0.852118	0.0188581	0.599932	4	110512771	110513732	-1	Gm12807	predicted gene 12807 [Source:MGI Symbol;Acc:MGI:3650599]	1.41824	2.249	2.24044	2.01306	0.643131	1.59862	1.96923	1.41827	-0.505295	1.14091	-0.172726	0.159889	1.8061	0.492457	0.154393	1.8006	0.486961
ENSMUSG00000022296	-1.42116	-0.507072	0.423927	0.018982	0.602372	15	38933142	38949405	1	Baalc	brain and acute leukemia, cytoplasmic [Source:MGI Symbol;Acc:MGI:1928704]	1.27641	0.918604	0.896178	1.63221	1.00664	1.80975	1.0304	1.48287	-0.354735	0.342547	-0.503699	-0.829315	-0.132032	-0.978279	-0.864973	-0.16769	-1.01394
ENSMUSG00000021091	1.26208	0.335803	2.81216	0.0191911	0.607497	12	104406729	104414329	1	Serpina3n	serine (or cysteine) peptidase inhibitor, clade A, member 3N [Source:MGI Symbol;Acc:MGI:105045]	4.72745	11.5617	9.53433	7.83462	8.80809	3.58934	8.60784	6.74402	-0.728801	-0.897767	0.397342	0.561423	0.392456	1.68757	0.283269	0.114302	1.40941
ENSMUSG00000000359	1.3249	0.405887	1.54936	0.0193554	0.609094	2	152626951	152635198	1	Rem1	rad and gem related GTP binding protein 1 [Source:MGI Symbol;Acc:MGI:1097696]	2.88375	3.10425	3.83365	2.99239	2.2929	2.11138	3.27388	2.46556	-0.0533543	0.33077	0.449758	0.052945	0.437069	0.556058	0.35742	0.741544	0.860532
ENSMUSG00000021268	-1.23191	-0.3009	6.44712	0.0195281	0.609094	12	109541001	109571726	1	Meg3	maternally expressed 3 [Source:MGI Symbol;Acc:MGI:1202886]	78.1684	75.8323	73.2874	88.9284	74.9387	116.186	75.7627	93.3511	-0.186058	0.0608748	-0.571781	-0.229831	0.0171017	-0.615554	-0.279079	-0.0321456	-0.664801
ENSMUSG00000057914	1.31432	0.394321	1.72899	0.0193554	0.609094	2	14603088	14987908	1	Cacnb2	calcium channel, voltage-dependent, beta 2 subunit [Source:MGI Symbol;Acc:MGI:894644]	3.6165	3.51603	4.23195	2.39391	3.52324	2.74479	3.78816	2.88731	0.595224	0.0376927	0.397897	0.554579	-0.00295248	0.357252	0.821952	0.264421	0.624625
ENSMUSG00000070720	1.34266	0.425089	1.2527	0.0195086	0.609094	4	131921771	131923140	1	Tmem200b	transmembrane protein 200B [Source:MGI Symbol;Acc:MGI:3646343]	2.45828	2.81916	3.01215	2.17628	1.84551	2.14154	2.7632	2.05444	0.17578	0.41363	0.198997	0.3734	0.611251	0.396617	0.468928	0.706779	0.492145
ENSMUSG00000099021	1.29876	0.377135	2.55625	0.0194907	0.609094	12	69159295	69159594	1	Rn7s1	7S RNA 1 [Source:MGI Symbol;Acc:MGI:97950]	3.4274	3.61106	7.61751	3.72689	2.2929	5.36894	4.88533	3.79624	-0.120855	0.579942	-0.64752	-0.0455472	0.65525	-0.572213	1.03135	1.73215	0.504683
ENSMUSG00000099250	1.29876	0.377135	2.55625	0.0194907	0.609094	12	69361182	69361481	-1	Rn7s2	7S RNA 2 [Source:MGI Symbol;Acc:MGI:97953]	3.4274	3.61106	7.61751	3.72689	2.2929	5.36894	4.88533	3.79624	-0.120855	0.579942	-0.64752	-0.0455472	0.65525	-0.572213	1.03135	1.73215	0.504683
ENSMUSG00000020836	-1.39238	-0.477557	0.73649	0.0197359	0.61258	11	77462411	77470484	1	Coro6	coronin 6 [Source:MGI Symbol;Acc:MGI:2183448]	1.34732	1.4571	1.29448	1.5506	1.95735	2.20187	1.3663	1.90327	-0.202732	-0.538808	-0.708631	-0.0897332	-0.425809	-0.595632	-0.260457	-0.596534	-0.766356
ENSMUSG00000023224	1.22849	0.296885	8.99204	0.0197124	0.61258	2	84765387	84775444	-1	Serping1	serine (or cysteine) peptidase inhibitor, clade G, member 1 [Source:MGI Symbol;Acc:MGI:894696]	482.176	693.229	683.609	507.618	558.014	447.522	619.672	504.385	-0.0741825	-0.210739	0.107603	0.449588	0.313031	0.631374	0.429428	0.292871	0.611214
ENSMUSG00000015468	-1.24148	-0.312057	4.48908	0.0197883	0.612717	17	34564268	34588503	1	Notch4	notch 4 [Source:MGI Symbol;Acc:MGI:107471]	17.8698	20.3677	22.3547	26.197	24.2712	24.7333	20.1974	25.0672	-0.551881	-0.441724	-0.468934	-0.363122	-0.252965	-0.280174	-0.228827	-0.11867	-0.14588
ENSMUSG00000098794	-1.31959	-0.400086	1.51253	0.0198493	0.613118	2	30281043	30301078	1	Gm28038	predicted gene, 28038 [Source:MGI Symbol;Acc:MGI:5547774]	2.6001	2.18564	2.88768	4.16214	3.1038	2.89561	2.55781	3.38718	-0.67876	-0.255471	-0.155299	-0.929269	-0.50598	-0.405807	-0.527414	-0.104125	-0.00395265
ENSMUSG00000047686	1.43381	0.519859	0.259824	0.0200488	0.617784	X	106837082	106840644	-1	Zcchc5	zinc finger, CCHC domain containing 5 [Source:MGI Symbol;Acc:MGI:2685221]	1.34732	1.39374	1.6181	0.816106	1.14645	1.08585	1.45306	1.01614	0.723268	0.232923	0.311269	0.772136	0.281791	0.360137	0.98747	0.497126	0.575472
ENSMUSG00000050295	1.2448	0.315914	4.0435	0.0203382	0.625191	13	31806633	31812476	1	Foxc1	forkhead box C1 [Source:MGI Symbol;Acc:MGI:1347466]	16.9243	18.8155	17.3012	12.4864	18.8745	11.1903	17.6803	14.1837	0.438734	-0.157343	0.596844	0.591564	-0.00451299	0.749674	0.470512	-0.125565	0.628623
ENSMUSG00000054932	-1.41824	-0.504098	0.37292	0.0205378	0.629808	5	90490737	90508907	1	Afp	alpha fetoprotein [Source:MGI Symbol;Acc:MGI:87951]	0.898216	0.7919	1.26958	1.22416	1.23034	1.80975	0.986567	1.42142	-0.446657	-0.453919	-1.01066	-0.628402	-0.635664	-1.1924	0.0525653	0.0453035	-0.511436
ENSMUSG00000020609	-1.46504	-0.550937	-0.00468355	0.0211368	0.645557	12	7977648	8016835	1	Apob	apolipoprotein B [Source:MGI Symbol;Acc:MGI:88052]	0.898216	0.63352	0.746815	1.36018	0.587206	1.4478	0.759517	1.13173	-0.598661	0.613195	-0.688731	-1.10233	0.109522	-1.1924	-0.864973	0.346883	-0.955043
ENSMUSG00000045680	1.22652	0.29457	7.52564	0.0211525	0.645557	10	22817281	22820174	-1	Tcf21	transcription factor 21 [Source:MGI Symbol;Acc:MGI:1202715]	184.016	253.123	234.973	179.516	200.098	168.277	224.037	182.63	0.0357177	-0.120872	0.128994	0.495724	0.339134	0.589	0.38838	0.23179	0.481656
ENSMUSG00000039763	1.32512	0.40612	1.35766	0.0213016	0.648555	16	91614257	91619026	-1	Dnajc28	DnaJ heat shock protein family (Hsp40) member C28 [Source:MGI Symbol;Acc:MGI:2181053]	2.48191	3.45268	2.53917	2.20349	2.68437	1.41764	2.82459	2.10183	0.171664	-0.113132	0.807961	0.647929	0.363133	1.28423	0.204568	-0.0802274	0.840865
ENSMUSG00000026582	-1.27195	-0.347042	2.5248	0.0214037	0.648568	1	164048234	164057677	1	Sele	selectin, endothelial cell [Source:MGI Symbol;Acc:MGI:98278]	5.86204	3.67441	4.77961	5.52232	5.76021	7.0882	4.77202	6.12358	0.0861285	0.0252806	-0.274017	-0.58776	-0.648608	-0.947905	-0.20838	-0.269228	-0.568526
ENSMUSG00000029304	-1.23119	-0.300054	6.14426	0.0213727	0.648568	5	104435118	104441050	1	Spp1	secreted phosphoprotein 1 [Source:MGI Symbol;Acc:MGI:98389]	41.4125	47.7991	41.1246	52.2036	50.3879	57.8216	43.4454	53.471	-0.334084	-0.283011	-0.481544	-0.127167	-0.0760946	-0.274627	-0.344148	-0.293076	-0.491608
ENSMUSG00000075012	1.34073	0.423023	1.16547	0.0215584	0.651708	2	102449366	102452499	-1	Fjx1	four jointed box 1 (Drosophila) [Source:MGI Symbol;Acc:MGI:1341907]	2.38736	2.47073	3.01215	1.76823	2.23698	1.87008	2.62341	1.95843	0.433112	0.0938682	0.352319	0.482629	0.143386	0.401837	0.768488	0.429245	0.687696
ENSMUSG00000059824	1.25593	0.328761	3.00365	0.0217388	0.655608	7	45705088	45710203	1	Dbp	D site albumin promoter binding protein [Source:MGI Symbol;Acc:MGI:94866]	6.47661	11.3083	9.13603	7.99784	7.94127	5.33877	8.97366	7.09263	-0.304372	-0.29413	0.27873	0.499703	0.509945	1.08281	0.191957	0.202199	0.77506
ENSMUSG00000001300	1.22525	0.293073	6.90878	0.0224305	0.661419	8	8617434	8661242	-1	Efnb2	ephrin B2 [Source:MGI Symbol;Acc:MGI:105097]	151.468	124.075	129.473	104.19	119.035	107.379	135.005	110.201	0.539798	0.347622	0.496301	0.252	0.0598236	0.208503	0.313438	0.121262	0.269941
ENSMUSG00000003849	-1.22485	-0.292606	7.0346	0.0223853	0.661419	8	107388225	107403206	-1	Nqo1	NAD(P)H dehydrogenase, quinone 1 [Source:MGI Symbol;Acc:MGI:103187]	142.556	98.1322	110.927	166.186	102.314	162.335	117.205	143.612	-0.221271	0.478533	-0.187441	-0.760004	-0.0602007	-0.726175	-0.583194	0.11661	-0.549364
ENSMUSG00000010803	-1.45711	-0.543106	-0.134454	0.0224902	0.661419	11	42130939	42182930	-1	Gabra1	gamma-aminobutyric acid (GABA) A receptor, subunit alpha 1 [Source:MGI Symbol;Acc:MGI:95613]	1.13459	0.506816	0.572558	1.33297	1.14645	0.814389	0.737987	1.09794	-0.232479	-0.0150047	0.478379	-1.39511	-1.17764	-0.684257	-1.21915	-1.00168	-0.508297
ENSMUSG00000034771	-1.33861	-0.420741	1.49639	0.0221966	0.661419	10	81574561	81590845	1	Tle2	transducin-like enhancer of split 2 [Source:MGI Symbol;Acc:MGI:104635]	1.74916	2.12229	2.29023	3.074	2.37679	2.77496	2.05389	2.74191	-0.813457	-0.442353	-0.665805	-0.534495	-0.16339	-0.386842	-0.424624	-0.0535193	-0.276971
ENSMUSG00000048279	-1.22796	-0.296262	5.74774	0.0223975	0.661419	14	61138457	61240695	1	Sacs	sacsin [Source:MGI Symbol;Acc:MGI:1354724]	58.8804	36.1423	42.7676	59.9838	59.3358	50.0397	45.9301	56.4531	-0.0267855	-0.0111148	0.234715	-0.730885	-0.715214	-0.469384	-0.488056	-0.472385	-0.226555
ENSMUSG00000065947	1.22795	0.296246	5.80818	0.0225018	0.661419	MT	9877	10173	1	mt-Nd4l	mitochondrially encoded NADH dehydrogenase 4L [Source:MGI Symbol;Acc:MGI:102497]	65.4752	59.2658	52.1277	59.8478	47.368	36.7682	58.9562	47.9946	0.129651	0.467037	0.832492	-0.0140991	0.323287	0.688742	-0.199249	0.138137	0.503592
ENSMUSG00000067736	1.22795	0.296246	5.80818	0.0225018	0.661419	1	24612407	24612700	-1	Gm10222	predicted gene 10222 [Source:MGI Symbol;Acc:MGI:3642643]	65.4752	59.2658	52.1277	59.8478	47.368	36.7682	58.9562	47.9946	0.129651	0.467037	0.832492	-0.0140991	0.323287	0.688742	-0.199249	0.138137	0.503592
ENSMUSG00000072720	-1.32403	-0.404938	1.28181	0.0224172	0.661419	5	112688876	112896362	-1	Myo18b	myosin XVIIIb [Source:MGI Symbol;Acc:MGI:1921626]	2.45828	1.61548	2.29023	2.93798	2.5166	3.07658	2.12133	2.84372	-0.25718	-0.0338286	-0.323682	-0.862867	-0.639516	-0.929369	-0.359333	-0.135981	-0.425835
ENSMUSG00000087575	-1.23778	-0.307756	4.25192	0.0224883	0.661419	4	129261965	129265010	1	Gm12976	predicted gene 12976 [Source:MGI Symbol;Acc:MGI:3650499]	18.2952	16.5665	15.4591	23.6127	11.3527	27.3876	16.7736	20.7843	-0.368093	0.688439	-0.582055	-0.511289	0.545243	-0.725251	-0.611109	0.445423	-0.82507
ENSMUSG00000097095	-1.28357	-0.36016	2.26527	0.0224346	0.661419	17	55557166	55563507	1	Gm26547	predicted gene, 26547 [Source:MGI Symbol;Acc:MGI:5477041]	4.46744	2.31235	3.80875	4.70621	3.88675	5.18796	3.52951	4.59364	-0.0751177	0.200886	-0.215718	-1.02521	-0.749205	-1.16581	-0.305247	-0.0292435	-0.445848
ENSMUSG00000097207	-1.32939	-0.410765	1.42605	0.0224172	0.661419	5	22550432	22807850	1	6030443J06Rik	RIKEN cDNA 6030443J06 gene [Source:MGI Symbol;Acc:MGI:2444595]	2.38736	2.12229	1.89193	2.99239	2.43271	3.10674	2.13386	2.84395	-0.32588	-0.0271472	-0.379985	-0.495676	-0.196943	-0.549781	-0.661439	-0.362706	-0.715544
ENSMUSG00000027861	-1.40099	-0.48645	0.31609	0.0227944	0.66785	3	102086415	102146514	1	Casq2	calsequestrin 2 [Source:MGI Symbol;Acc:MGI:1309469]	0.94549	1.10866	1.44384	1.65942	1.76162	1.47797	1.166	1.633	-0.811541	-0.897767	-0.644478	-0.581859	-0.668085	-0.414796	-0.200763	-0.286989	-0.0337
ENSMUSG00000030306	1.35034	0.433323	0.963169	0.02293	0.66785	6	148232430	148444389	-1	Tmtc1	transmembrane and tetratricopeptide repeat containing 1 [Source:MGI Symbol;Acc:MGI:3039590]	1.77279	2.249	2.813	1.44179	2.0692	1.53829	2.27826	1.68309	0.298166	-0.22305	0.204697	0.641422	0.120205	0.547952	0.964252	0.443035	0.870782
ENSMUSG00000038843	1.25857	0.331787	2.751	0.0228554	0.66785	19	17326141	17356667	-1	Gcnt1	glucosaminyl (N-acetyl) transferase 1, core 2 [Source:MGI Symbol;Acc:MGI:95676]	8.29668	8.80593	8.91199	7.07292	7.80146	5.76105	8.67153	6.87848	0.230228	0.0887907	0.526202	0.316168	0.174731	0.612143	0.333441	0.192004	0.629416
ENSMUSG00000073409	1.22285	0.29025	7.99515	0.0228938	0.66785	17	35424850	35430055	1	H2-Q6	histocompatibility 2, Q region locus 6 [Source:MGI Symbol;Acc:MGI:95935]	227.249	368.55	304.327	244.696	276.63	214.607	300.042	245.311	-0.106718	-0.283686	0.082577	0.590871	0.413903	0.780166	0.314632	0.137664	0.503928
ENSMUSG00000043154	1.22977	0.298386	5.11723	0.0230565	0.670004	9	101105084	101251795	-1	Ppp2r3a	protein phosphatase 2, regulatory subunit B'', alpha [Source:MGI Symbol;Acc:MGI:2442104]	34.6522	39.7534	40.6267	29.7335	38.9234	24.8238	38.3441	31.1602	0.22086	-0.167689	0.481225	0.418989	0.0304397	0.679354	0.450341	0.0617916	0.710706
ENSMUSG00000001507	-1.24286	-0.31366	3.69439	0.0233746	0.670089	11	95044474	95076801	-1	Itga3	integrin alpha 3 [Source:MGI Symbol;Acc:MGI:96602]	11.3932	11.4984	12.0486	13.765	13.2541	16.4386	11.6467	14.4859	-0.272836	-0.218269	-0.528919	-0.259573	-0.205006	-0.515656	-0.192137	-0.13757	-0.44822
ENSMUSG00000025006	-1.23097	-0.299792	4.8761	0.0233646	0.670089	19	40295049	40402267	-1	Sorbs1	sorbin and SH3 domain containing 1 [Source:MGI Symbol;Acc:MGI:700014]	27.4192	23.4402	25.4415	32.8347	28.9409	32.2136	25.4336	31.3297	-0.260033	-0.0779212	-0.232483	-0.486234	-0.304122	-0.458684	-0.368037	-0.185926	-0.340488
ENSMUSG00000026365	1.22415	0.291786	6.32517	0.0232844	0.670089	1	140084708	140183764	-1	Cfh	complement component factor h [Source:MGI Symbol;Acc:MGI:88385]	75.5211	115.459	103.782	76.4964	106.228	57.9121	98.2541	80.2123	-0.0185126	-0.492219	0.383014	0.593917	0.120211	0.995443	0.440098	-0.0336086	0.841624
ENSMUSG00000042367	-1.23786	-0.307847	3.9473	0.0232612	0.670089	4	127325235	127330844	-1	Gjb3	gap junction protein, beta 3 [Source:MGI Symbol;Acc:MGI:95721]	18.1061	12.607	12.6461	21.654	12.5271	19.6057	14.4531	17.9289	-0.258156	0.53143	-0.114791	-0.780405	0.00918127	-0.637041	-0.775947	0.0136395	-0.632582
ENSMUSG00000042817	-1.25696	-0.329944	2.98342	0.0232463	0.670089	5	147330741	147400489	-1	Flt3	FMS-like tyrosine kinase 3 [Source:MGI Symbol;Acc:MGI:95559]	7.77666	8.7109	5.6509	10.0653	4.69765	13.0302	7.37948	9.2644	-0.37217	0.727211	-0.74464	-0.208499	0.890882	-0.580969	-0.83284	0.266541	-1.20531
ENSMUSG00000078937	1.47812	0.563767	0.0393898	0.0233654	0.670089	15	89416405	89425863	-1	Cpt1b	carnitine palmitoyltransferase 1b, muscle [Source:MGI Symbol;Acc:MGI:1098297]	1.13459	0.855252	1.29448	0.680089	0.699055	0.874714	1.09477	0.751286	0.738374	0.698691	0.375285	0.330626	0.290943	-0.0324628	0.928577	0.888893	0.565488
ENSMUSG00000091562	-1.2461	-0.317424	3.57285	0.0236466	0.676368	16	59558013	59600886	-1	Crybg3	beta-gamma crystallin domain containing 3 [Source:MGI Symbol;Acc:MGI:2676311]	9.85674	9.59782	10.3807	12.7857	12.611	11.7936	9.9451	12.3967	-0.375345	-0.355495	-0.258817	-0.413748	-0.393898	-0.29722	-0.30062	-0.28077	-0.184092
ENSMUSG00000004655	-1.27122	-0.346213	2.70897	0.0237926	0.679021	6	55336432	55348555	1	Aqp1	aquaporin 1 [Source:MGI Symbol;Acc:MGI:103201]	5.53112	3.92782	3.75897	6.36563	4.25026	6.27381	4.40597	5.6299	-0.202732	0.380022	-0.181771	-0.696574	-0.11382	-0.675613	-0.759967	-0.177213	-0.739006
ENSMUSG00000020027	1.22494	0.292712	5.68701	0.02419	0.681219	10	95385362	95417180	-1	Socs2	suppressor of cytokine signaling 2 [Source:MGI Symbol;Acc:MGI:1201787]	47.2036	64.2072	58.6001	42.5736	57.6581	38.4573	56.6703	46.2296	0.14894	-0.288625	0.295641	0.592778	0.155213	0.73948	0.460945	0.0233797	0.607646
ENSMUSG00000026180	-1.28772	-0.364818	1.83677	0.0241375	0.681219	1	74153989	74161246	1	Cxcr2	chemokine (C-X-C motif) receptor 2 [Source:MGI Symbol;Acc:MGI:105303]	3.52195	3.19927	3.03705	4.40697	2.54456	5.67056	3.25276	4.20737	-0.323413	0.468959	-0.687116	-0.462044	0.330328	-0.825747	-0.53712	0.255252	-0.900823
ENSMUSG00000051498	1.27966	0.355766	2.20957	0.0241204	0.681219	5	64952031	64960097	-1	Tlr6	toll-like receptor 6 [Source:MGI Symbol;Acc:MGI:1341296]	4.39653	5.73335	5.32728	4.05333	4.02656	3.9513	5.15239	4.01039	0.117258	0.126819	0.15404	0.500272	0.509832	0.537054	0.394292	0.403852	0.431073
ENSMUSG00000054889	-1.29526	-0.373236	1.67932	0.0239461	0.681219	13	38151328	38198577	1	Dsp	desmoplakin [Source:MGI Symbol;Acc:MGI:109611]	3.35649	2.72414	2.91258	4.95105	2.99196	3.74016	2.99773	3.89439	-0.560779	0.165865	-0.156145	-0.861935	-0.135291	-0.457301	-0.765437	-0.0387925	-0.360803
ENSMUSG00000091655	1.36157	0.445272	0.735184	0.0240296	0.681219	17	35335909	35336292	1	Gm8741	predicted gene 8741 [Source:MGI Symbol;Acc:MGI:3644779]	2.36373	2.43905	1.81725	1.71382	0	3.19723	2.20668	1.63702	0.463844	#DIV/0!	-0.43576	0.509102	#DIV/0!	-0.390503	0.0845377	#DIV/0!	-0.815067
ENSMUSG00000097383	-1.38677	-0.471729	0.713962	0.0240434	0.681219	10	89686371	89700866	1	1500026H17Rik	RIKEN cDNA 1500026H17 gene [Source:MGI Symbol;Acc:MGI:1916252]	1.15823	1.10866	1.39405	1.84984	1.76162	1.47797	1.22031	1.69648	-0.675485	-0.604985	-0.351696	-0.738585	-0.668085	-0.414796	-0.408115	-0.337615	-0.0843261
ENSMUSG00000001930	-1.31154	-0.391266	1.7014	0.0242684	0.681919	6	125546774	125686679	1	Vwf	Von Willebrand factor [Source:MGI Symbol;Acc:MGI:98941]	2.57646	2.40738	2.36491	3.48205	2.18105	4.01162	2.44958	3.22491	-0.434548	0.240367	-0.638794	-0.532478	0.142437	-0.736724	-0.558151	0.116763	-0.762398
ENSMUSG00000018849	-1.23968	-0.30997	3.73819	0.02441	0.684392	11	35838400	35980527	-1	Wwc1	WW, C2 and coiled-coil domain containing 1 [Source:MGI Symbol;Acc:MGI:2388637]	12.4332	10.4531	12.3971	14.6627	13.0024	16.1671	11.7611	14.6108	-0.237954	-0.0645831	-0.378866	-0.488224	-0.314853	-0.629136	-0.242146	-0.0687752	-0.383058
ENSMUSG00000029720	-1.27972	-0.355833	2.27156	0.0246398	0.689321	5	137629175	137642899	1	Gm20605	predicted gene 20605 [Source:MGI Symbol;Acc:MGI:5306917]	3.94742	3.86447	3.46024	4.86943	3.01992	6.57544	3.75738	4.8216	-0.302843	0.386402	-0.736176	-0.333484	0.355761	-0.766816	-0.492882	0.196363	-0.926214
ENSMUSG00000002020	1.22009	0.286987	6.79557	0.0252458	0.703418	12	84783212	84876532	-1	Ltbp2	latent transforming growth factor beta binding protein 2 [Source:MGI Symbol;Acc:MGI:99502]	88.9943	148.972	146.525	101.823	129.801	83.3693	128.164	104.998	-0.194277	-0.544512	0.0941962	0.548981	0.198746	0.837454	0.525086	0.174851	0.813559
ENSMUSG00000052485	-1.35557	-0.438897	0.741019	0.025254	0.703418	13	98686235	98694834	-1	Tmem171	transmembrane protein 171 [Source:MGI Symbol;Acc:MGI:2685751]	1.89098	0.823576	1.07043	1.5506	1.09053	2.65431	1.26166	1.76514	0.286306	0.794111	-0.4892	-0.912855	-0.405051	-1.68836	-0.534632	-0.0268277	-1.31014
ENSMUSG00000014782	-1.48397	-0.56946	-0.40625	0.0253389	0.704141	8	105373274	105382862	1	Plekhg4	pleckstrin homology domain containing, family G (with RhoGef domain) member 4 [Source:MGI Symbol;Acc:MGI:2142544]	0.969128	0.411788	0.423195	1.00653	0.643131	1.11601	0.60137	0.921892	-0.0546333	0.591575	-0.203597	-1.28942	-0.643211	-1.43838	-1.25	-0.603789	-1.39896
ENSMUSG00000027456	-1.27424	-0.34964	2.08296	0.0254329	0.704141	2	151572622	151590005	1	Sdcbp2	syndecan binding protein (syntenin) 2 [Source:MGI Symbol;Acc:MGI:2385156]	4.79836	3.80112	3.46024	4.43418	3.91471	7.11836	4.01991	5.15575	0.113876	0.293638	-0.569003	-0.222243	-0.0424808	-0.905122	-0.357794	-0.178032	-1.04067
ENSMUSG00000085623	-1.29933	-0.377765	1.83336	0.0254455	0.704141	1	4970857	4976820	1	Gm16041	predicted gene 16041 [Source:MGI Symbol;Acc:MGI:3801909]	3.02557	2.53408	2.71343	3.61807	2.82418	4.37357	2.75769	3.60528	-0.258014	0.0993733	-0.531605	-0.513759	-0.156372	-0.78735	-0.415105	-0.0577174	-0.688696
ENSMUSG00000019889	-1.22067	-0.287669	6.17063	0.0257892	0.709036	10	28074820	28597397	1	Ptprk	protein tyrosine phosphatase, receptor type, K [Source:MGI Symbol;Acc:MGI:103310]	74.7883	48.8444	59.4713	73.504	64.9003	85.2997	61.0347	74.568	0.02499	0.204588	-0.189729	-0.58963	-0.410032	-0.804349	-0.305628	-0.12603	-0.520346
ENSMUSG00000027004	1.21772	0.284177	8.38906	0.0257761	0.709036	2	80411970	80447625	-1	Frzb	frizzled-related protein [Source:MGI Symbol;Acc:MGI:892032]	301.021	432.916	403.977	324.484	380.817	229.024	379.304	311.442	-0.108285	-0.339237	0.394361	0.415939	0.184987	0.918585	0.316126	0.0851742	0.818772
ENSMUSG00000044167	1.22738	0.295587	4.66542	0.0257809	0.709036	3	52268336	52353221	1	Foxo1	forkhead box O1 [Source:MGI Symbol;Acc:MGI:1890077]	26.5919	31.866	30.1962	21.5452	28.9129	21.717	29.5514	24.0584	0.303621	-0.120726	0.29216	0.564653	0.140306	0.553192	0.487	0.0626531	0.47554
ENSMUSG00000024737	1.24527	0.316456	3.02558	0.025917	0.711019	19	10839727	10859362	1	Slc15a3	solute carrier family 15, member 3 [Source:MGI Symbol;Acc:MGI:1929691]	6.26387	14.0008	8.91199	8.02505	8.5844	6.6056	9.72555	7.73835	-0.357454	-0.454662	-0.0766346	0.802926	0.705719	1.08375	0.151238	0.0540307	0.432058
ENSMUSG00000002944	1.30617	0.385341	1.19244	0.026093	0.711925	5	17781690	17888801	-1	Cd36	CD36 antigen [Source:MGI Symbol;Acc:MGI:107899]	1.96189	4.40296	1.91682	1.5506	2.90807	1.71927	2.76056	2.05931	0.339418	-0.567815	0.190453	1.50565	0.598413	1.35668	0.30589	-0.601343	0.156925
ENSMUSG00000027217	-1.3248	-0.405779	1.43059	0.026093	0.711925	2	93201760	93334505	-1	Tspan18	tetraspanin 18 [Source:MGI Symbol;Acc:MGI:1917186]	1.98553	2.02726	2.16576	2.80197	2.23698	3.16707	2.05952	2.73534	-0.496915	-0.172026	-0.673624	-0.466906	-0.142017	-0.643615	-0.371564	-0.0466749	-0.548273
ENSMUSG00000041842	1.22202	0.289262	5.59132	0.0262817	0.711925	3	84442198	84480429	-1	Fhdc1	FH2 domain containing 1 [Source:MGI Symbol;Acc:MGI:2684972]	68.1462	51.1884	56.6086	46.5181	42.7822	54.7752	58.6477	48.0252	0.550843	0.671624	0.315111	0.138026	0.258807	-0.0977063	0.283229	0.40401	0.0474969
ENSMUSG00000056899	1.44845	0.534506	0.0708232	0.0262849	0.711925	12	41024090	41955588	1	Immp2l	IMP2 inner mitochondrial membrane peptidase-like (S. cerevisiae) [Source:MGI Symbol;Acc:MGI:2135611]	1.08731	1.29872	1.17001	1.00653	0.75498	0.663576	1.18535	0.808362	0.111377	0.526259	0.712434	0.367694	0.782576	0.968751	0.217129	0.632011	0.818186
ENSMUSG00000058163	1.23357	0.302838	3.77606	0.0261905	0.711925	11	48887422	48902214	-1	Gm5431	predicted gene 5431 [Source:MGI Symbol;Acc:MGI:3645205]	12.5514	21.0962	14.2393	10.9358	17.8119	9.89332	15.9623	12.8804	0.198784	-0.504997	0.34332	0.947922	0.24414	1.09246	0.380813	-0.322968	0.525348
ENSMUSG00000082894	-1.2714	-0.346416	2.2244	0.0261747	0.711925	X	47724528	47726413	1	Gm6480	predicted pseudogene 6480 [Source:MGI Symbol;Acc:MGI:3647765]	4.44381	2.28067	3.65939	4.51579	2.54456	6.3643	3.46129	4.47488	-0.0231825	0.804379	-0.518206	-0.98552	-0.157958	-1.48054	-0.303374	0.524187	-0.798398
ENSMUSG00000029206	-1.27357	-0.348875	2.24448	0.026431	0.714365	5	66259897	66298026	1	Nsun7	NOL1/NOP2/Sun domain family, member 7 [Source:MGI Symbol;Acc:MGI:1918168]	4.06561	3.9595	3.93322	4.95105	4.83746	5.45942	3.98611	5.08264	-0.284262	-0.250779	-0.425277	-0.322415	-0.288932	-0.463431	-0.332021	-0.298538	-0.473036
ENSMUSG00000020009	1.22118	0.288278	5.63783	0.0264884	0.714404	10	19591949	19610229	1	Ifngr1	interferon gamma receptor 1 [Source:MGI Symbol;Acc:MGI:107655]	49.5201	60.5328	60.8654	47.443	51.2827	41.1719	56.9728	46.6325	0.0618183	-0.0504586	0.266353	0.351523	0.239246	0.556058	0.359427	0.247151	0.563962
ENSMUSG00000025432	-1.38477	-0.469648	0.432952	0.0267823	0.715392	10	127000709	127020994	1	Avil	advillin [Source:MGI Symbol;Acc:MGI:1333798]	1.18186	0.823576	1.1949	1.82264	0.699055	1.99073	1.06678	1.50414	-0.624965	0.757585	-0.752234	-1.14605	0.236495	-1.27332	-0.609134	0.773416	-0.736403
ENSMUSG00000033949	-1.37973	-0.464388	0.409731	0.0267663	0.715392	18	46165302	46212607	-1	Trim36	tripartite motif-containing 36 [Source:MGI Symbol;Acc:MGI:106264]	1.56006	1.04531	0.721921	1.5234	1.45403	1.65894	1.1091	1.54546	0.0343073	0.101539	-0.0886617	-0.543366	-0.476134	-0.666335	-1.07738	-1.01015	-1.20035
ENSMUSG00000075010	1.31964	0.400147	0.895787	0.026636	0.715392	19	11047617	11050566	-1	AW112010	expressed sequence AW112010 [Source:MGI Symbol;Acc:MGI:2147706]	1.60733	3.38933	2.26534	1.90425	2.40475	1.05569	2.42067	1.78823	-0.244552	-0.581217	0.606484	0.831779	0.495114	1.68281	0.250505	-0.0861604	1.10154
ENSMUSG00000092074	-1.26074	-0.334276	2.5189	0.0267827	0.715392	17	6310547	6317474	-1	Dynlt1a	dynein light chain Tctex-type 1A [Source:MGI Symbol;Acc:MGI:3807506]	5.74385	5.09983	4.87919	6.03919	6.2915	7.54064	5.24096	6.62377	-0.0723353	-0.131384	-0.392668	-0.243904	-0.302953	-0.564237	-0.307713	-0.366762	-0.628046
ENSMUSG00000093378	-1.45726	-0.543256	0.172159	0.0268055	0.715392	7	105901568	106093337	1	Gm20663	predicted gene 20663 [Source:MGI Symbol;Acc:MGI:5313110]	0.709118	0.665196	0.871284	1.03373	1.06256	1.2065	0.748532	1.10093	-0.543769	-0.583452	-0.766734	-0.636015	-0.675699	-0.85898	-0.246651	-0.286335	-0.469616
ENSMUSG00000020812	-1.25504	-0.327733	2.73704	0.0271368	0.716552	11	116671660	116675799	1	1810032O08Rik	RIKEN cDNA 1810032O08 gene [Source:MGI Symbol;Acc:MGI:1913543]	6.19296	6.01844	5.35217	7.6986	6.20761	8.14389	5.85452	7.35004	-0.313967	-0.00340807	-0.395089	-0.355208	-0.0446487	-0.436329	-0.524472	-0.213913	-0.605594
ENSMUSG00000022321	1.27566	0.351241	1.93197	0.0270061	0.716552	15	18818947	19014236	1	Cdh10	cadherin 10 [Source:MGI Symbol;Acc:MGI:107436]	3.47468	4.8781	5.75047	3.26443	5.25689	2.47333	4.70108	3.66488	0.0900499	-0.597332	0.490424	0.579491	-0.107891	0.979865	0.816851	0.12947	1.21723
ENSMUSG00000033208	-1.44789	-0.533953	0.0168576	0.0271938	0.716552	10	76253853	76261159	1	S100b	S100 protein, beta polypeptide, neural [Source:MGI Symbol;Acc:MGI:98217]	1.04004	0.855252	0.572558	1.27857	0.866828	1.4478	0.822616	1.19773	-0.297889	0.26282	-0.477227	-0.580106	-0.0193972	-0.759444	-1.15903	-0.598325	-1.33837
ENSMUSG00000040121	1.44622	0.532287	0.0815224	0.0271938	0.716552	6	147032584	147034245	1	Rep15	RAB15 effector protein [Source:MGI Symbol;Acc:MGI:1913782]	0.850941	1.33039	1.39405	0.707292	0.727017	1.02553	1.1918	0.819946	0.266753	0.22707	-0.269234	0.911473	0.871789	0.375485	0.978908	0.939225	0.442921
ENSMUSG00000059173	1.21786	0.284353	6.38303	0.0270023	0.716552	2	79834453	80129458	-1	Pde1a	phosphodiesterase 1A, calmodulin-dependent [Source:MGI Symbol;Acc:MGI:1201792]	71.03	115.364	111.624	79.2439	106.312	58.998	99.3393	81.5181	-0.157873	-0.581809	0.267763	0.54182	0.117884	0.967455	0.494274	0.0703375	0.919909
ENSMUSG00000060981	-1.31057	-0.390193	1.5029	0.0272031	0.716552	13	23531050	23531522	1	Hist1h4h	histone cluster 1, H4h [Source:MGI Symbol;Acc:MGI:2448427]	2.36373	2.97754	2.26534	4.29816	2.7403	2.83528	2.53554	3.29125	-0.862656	-0.213269	-0.262429	-0.529597	0.119791	0.0706307	-0.923993	-0.274605	-0.323765
ENSMUSG00000090639	-1.22844	-0.296825	4.39295	0.0272421	0.716552	9	103190208	103230307	-1	Gm20425	predicted gene 20425 [Source:MGI Symbol;Acc:MGI:5141890]	18.3425	19.1323	19.3176	26.7411	21.6987	21.2948	18.9308	23.2448	-0.543867	-0.242415	-0.215308	-0.483048	-0.181597	-0.154489	-0.469142	-0.16769	-0.140583
ENSMUSG00000024076	-1.27815	-0.35406	2.296	0.027347	0.717831	17	78508063	78627409	1	Vit	vitrin [Source:MGI Symbol;Acc:MGI:1921449]	3.9947	2.88252	2.91258	3.8357	3.3275	5.45942	3.26326	4.20754	0.0585962	0.263646	-0.450663	-0.412162	-0.207112	-0.921421	-0.397194	-0.192143	-0.906452
ENSMUSG00000005357	1.23157	0.300494	3.84124	0.0279209	0.728883	10	78780496	78814765	1	Slc1a6	solute carrier family 1 (high affinity aspartate/glutamate transporter), member 6 [Source:MGI Symbol;Acc:MGI:1096331]	14.3715	18.4988	16.4548	13.7922	13.7854	12.3968	16.4417	13.3248	0.0593537	0.0600685	0.213237	0.423578	0.424292	0.577461	0.254658	0.255372	0.408541
ENSMUSG00000009731	1.28993	0.367298	1.92095	0.0278444	0.728883	X	7822289	7838280	1	Kcnd1	potassium voltage-gated channel, Shal-related family, member 1 [Source:MGI Symbol;Acc:MGI:96671]	2.97829	4.30793	4.0328	2.72035	2.99196	3.01626	3.77301	2.90952	0.130692	-0.00660227	-0.0182723	0.663202	0.525907	0.514237	0.567987	0.430693	0.419023
ENSMUSG00000020173	-1.23588	-0.305541	3.45473	0.0279395	0.728883	11	12236608	12464960	-1	Cobl	cordon-bleu WH2 repeat [Source:MGI Symbol;Acc:MGI:105056]	13.2132	7.1271	8.41411	13.765	9.56307	12.3968	9.58481	11.9083	-0.059021	0.466437	0.0920138	-0.949617	-0.42416	-0.798583	-0.710121	-0.184663	-0.559086
ENSMUSG00000085395	-1.30632	-0.385506	1.33597	0.0280073	0.729161	4	141278439	141279794	1	Gm13056	predicted gene 13056 [Source:MGI Symbol;Acc:MGI:3650725]	2.69465	1.90056	2.16576	3.31883	2.68437	2.89561	2.25366	2.96627	-0.300579	0.00551231	-0.103769	-0.804252	-0.49816	-0.607441	-0.615801	-0.309709	-0.41899
ENSMUSG00000026841	-1.3755	-0.459961	0.550344	0.0282772	0.732575	2	31813290	31846005	-1	Fibcd1	fibrinogen C domain containing 1 [Source:MGI Symbol;Acc:MGI:2138953]	1.63097	0.760224	0.84639	1.76823	0.75498	2.05105	1.07919	1.52475	-0.116575	1.11122	-0.330634	-1.21781	0.00998657	-1.43187	-1.06291	0.164885	-1.27697
ENSMUSG00000062515	-1.35485	-0.438135	1.09766	0.0283107	0.732575	3	10204088	10208576	-1	Fabp4	fatty acid binding protein 4, adipocyte [Source:MGI Symbol;Acc:MGI:88038]	1.46551	1.23536	1.36916	1.95866	1.34219	2.26219	1.35668	1.85434	-0.418461	0.126819	-0.626318	-0.664928	-0.119649	-0.872786	-0.516572	0.0287069	-0.72443
ENSMUSG00000086697	-1.4092	-0.494878	0.152005	0.0282912	0.732575	5	23815618	23831897	-1	4933427G23Rik	RIKEN cDNA 4933427G23 gene [Source:MGI Symbol;Acc:MGI:3036235]	1.04004	0.760224	0.921071	1.76823	0.950715	1.14618	0.907112	1.28837	-0.765668	0.129554	-0.140192	-1.21781	-0.322589	-0.592334	-0.940921	-0.0456997	-0.315445
ENSMUSG00000048706	1.22404	0.291654	4.49076	0.0286212	0.737617	4	80910646	80955628	1	Lurap1l	leucine rich adaptor protein 1-like [Source:MGI Symbol;Acc:MGI:106510]	27.1829	27.9699	25.4913	19.1241	26.2565	20.4804	26.8813	21.9537	0.507305	0.0500216	0.408454	0.548484	0.0911999	0.449633	0.414612	-0.0426716	0.315761
ENSMUSG00000081752	1.25652	0.329431	2.87308	0.028588	0.737617	X	62775585	62776685	-1	Gm14680	predicted gene 14680 [Source:MGI Symbol;Acc:MGI:3705601]	7.6112	4.14955	10.6795	6.71928	6.37538	4.88634	7.48007	5.99366	0.179818	0.255612	0.639371	-0.695349	-0.619555	-0.235796	0.66846	0.744254	1.12801
ENSMUSG00000096802	1.25055	0.322566	2.75591	0.0287282	0.738881	1	84963669	84964559	1	Gm15433	predicted pseudogene 15433 [Source:MGI Symbol;Acc:MGI:3705860]	7.39846	7.79229	8.16517	7.10013	6.23557	5.30861	7.78531	6.21477	0.059381	0.246704	0.478891	0.134203	0.321526	0.553714	0.201639	0.388962	0.621149
ENSMUSG00000028287	-1.32519	-0.406202	0.911479	0.0289472	0.74025	4	39450295	39451776	1	1700009N14Rik	RIKEN cDNA 1700009N14 gene [Source:MGI Symbol;Acc:MGI:1922721]	2.2219	0.823576	1.46874	1.87704	1.95735	2.32252	1.50474	2.05231	0.243332	0.182891	-0.0638938	-1.18849	-1.24893	-1.49572	-0.353888	-0.41433	-0.661115
ENSMUSG00000051359	-1.24375	-0.314693	3.11669	0.0289555	0.74025	15	37366175	37792570	-1	Ncald	neurocalcin delta [Source:MGI Symbol;Acc:MGI:1196326]	7.06754	7.53889	8.4639	9.30361	10.4579	8.92812	7.69011	9.5632	-0.396583	-0.565308	-0.337148	-0.30344	-0.472165	-0.244005	-0.136469	-0.305194	-0.0770336
ENSMUSG00000068417	-1.22087	-0.287909	4.92773	0.0288637	0.74025	14	50955992	50964749	1	Pnp2	purine-nucleoside phosphorylase 2 [Source:MGI Symbol;Acc:MGI:3712328]	30.303	28.3817	27.1592	35.011	27.347	42.499	28.6146	34.9524	-0.208348	0.148075	-0.487971	-0.302847	0.0535758	-0.58247	-0.366368	-0.00994554	-0.645992
ENSMUSG00000039081	1.24739	0.318913	2.93308	0.0292149	0.74539	14	21983962	21989601	-1	Zfp503	zinc finger protein 503 [Source:MGI Symbol;Acc:MGI:1353644]	7.30391	9.28106	7.6673	5.84876	7.99719	5.51975	8.08409	6.45523	0.320538	-0.130824	0.404067	0.666159	0.214797	0.749688	0.390587	-0.0607751	0.474116
ENSMUSG00000030468	-1.21688	-0.283187	5.45098	0.0294663	0.750303	7	43408204	43418358	1	Siglecg	sialic acid binding Ig-like lectin G [Source:MGI Symbol;Acc:MGI:2443630]	47.96	33.925	39.3073	48.5039	35.4561	63.7033	40.3974	49.2211	-0.0162697	0.435799	-0.409537	-0.515753	-0.0636847	-0.909021	-0.303302	0.148766	-0.69657
ENSMUSG00000001864	-1.2574	-0.330439	2.54888	0.0298304	0.755163	2	31950139	31973442	1	Aif1l	allograft inflammatory factor 1-like [Source:MGI Symbol;Acc:MGI:1919598]	5.81477	4.68805	3.95812	6.58326	4.94931	6.69609	4.82031	6.07622	-0.179081	0.232494	-0.203597	-0.489815	-0.0782406	-0.514332	-0.733987	-0.322413	-0.758504
ENSMUSG00000021810	1.2166	0.282858	5.54283	0.0298348	0.755163	14	20319859	20348121	-1	Ecd	ecdysoneless homolog (Drosophila) [Source:MGI Symbol;Acc:MGI:1917851]	57.7931	53.5958	53.0487	44.2874	44.6836	46.209	54.8125	45.06	0.384002	0.371152	0.322722	0.275224	0.262374	0.213944	0.260423	0.247573	0.199143
ENSMUSG00000029675	1.35967	0.443261	0.374324	0.0298094	0.755163	5	134702593	134747323	-1	Eln	elastin [Source:MGI Symbol;Acc:MGI:95317]	0.78003	2.15397	1.71767	0.816106	2.0692	0.422276	1.55056	1.10253	-0.0652284	-1.40747	0.885343	1.40017	0.0579211	2.35074	1.07363	-0.268619	2.0242
ENSMUSG00000037617	-1.26113	-0.334717	2.39372	0.0298984	0.755274	15	36179368	36235610	1	Spag1	sperm associated antigen 1 [Source:MGI Symbol;Acc:MGI:1349387]	4.70382	4.62469	4.50578	4.65181	5.98391	6.8469	4.61143	5.82754	0.0160402	-0.347258	-0.54162	-0.00843307	-0.371731	-0.566093	-0.0460136	-0.409311	-0.603674
ENSMUSG00000033207	-1.24874	-0.320468	3.04262	0.0301316	0.759661	19	23302609	23448322	-1	Mamdc2	MAM domain containing 2 [Source:MGI Symbol;Acc:MGI:1918988]	4.94019	7.31715	8.19007	8.18827	10.8214	6.42463	6.8158	8.47809	-0.728992	-1.13125	-0.379047	-0.162276	-0.564529	0.18767	0.000317133	-0.401936	0.350263
ENSMUSG00000026131	-1.21046	-0.27556	9.32014	0.0303897	0.764225	1	33908225	34308661	1	Dst	dystonin [Source:MGI Symbol;Acc:MGI:104627]	601.994	487.937	591.378	701.144	682.781	651.33	560.436	678.419	-0.219963	-0.181675	-0.113641	-0.523017	-0.484728	-0.416695	-0.245631	-0.207343	-0.13931
ENSMUSG00000029381	1.22321	0.290669	4.11945	0.0307019	0.764225	5	92683435	92965318	1	Shroom3	shroom family member 3 [Source:MGI Symbol;Acc:MGI:1351655]	17.137	23.3769	23.2757	17.5735	18.8745	15.6242	21.2632	17.3574	-0.0362851	-0.139322	0.133333	0.411682	0.308645	0.581299	0.405425	0.302389	0.575043
ENSMUSG00000030671	-1.22386	-0.291434	4.38167	0.0307229	0.764225	7	114415281	114539251	1	Pde3b	phosphodiesterase 3B, cGMP-inhibited [Source:MGI Symbol;Acc:MGI:1333863]	16.7115	15.0144	18.6953	19.8858	24.1034	17.7657	16.8071	20.585	-0.250893	-0.528393	-0.0882535	-0.405389	-0.682889	-0.24275	-0.0890655	-0.366565	0.0735741
ENSMUSG00000033906	1.26805	0.34261	2.13275	0.0306229	0.764225	X	104536969	104671064	-1	Zdhhc15	zinc finger, DHHC domain containing 15 [Source:MGI Symbol;Acc:MGI:1915336]	4.91655	5.22654	4.60536	4.18935	4.69765	2.68447	4.91615	3.85715	0.230921	0.0657071	0.87301	0.319131	0.153916	0.961219	0.136588	-0.0286262	0.778677
ENSMUSG00000036890	1.26442	0.338472	2.37269	0.030732	0.764225	2	44564412	44927657	-1	Gtdc1	glycosyltransferase-like domain containing 1 [Source:MGI Symbol;Acc:MGI:2444269]	4.49108	5.67	5.2277	4.35257	4.69765	3.04642	5.12959	4.03221	0.0451956	-0.064877	0.559948	0.381483	0.27141	0.896235	0.26431	0.154238	0.779063
ENSMUSG00000055480	1.26256	0.336356	2.26135	0.030644	0.764225	13	67254918	67269068	-1	Zfp458	zinc finger protein 458 [Source:MGI Symbol;Acc:MGI:3040691]	5.41293	5.73335	4.53068	4.16214	5.70429	2.47333	5.22565	4.11325	0.379084	-0.0756368	1.12996	0.462053	0.00733212	1.21292	0.1224	-0.332321	0.873271
ENSMUSG00000063018	1.38064	0.465342	0.48508	0.0305892	0.764225	X	7411817	7445143	-1	2010204K13Rik	RIKEN cDNA 2010204K13 gene [Source:MGI Symbol;Acc:MGI:1922859]	1.51278	1.77386	1.36916	1.27857	1.06256	0.995365	1.55193	1.11217	0.242679	0.509657	0.60391	0.472361	0.739339	0.833592	0.0987639	0.365742	0.459994
ENSMUSG00000080717	-1.26171	-0.33538	2.29752	0.0308256	0.765063	16	97997323	98010000	1	B230307C23Rik	RIKEN cDNA B230307C23 gene [Source:MGI Symbol;Acc:MGI:3643396]	4.46744	3.64274	4.53068	5.90317	5.50855	4.58471	4.21362	5.33214	-0.402041	-0.302225	-0.0373812	-0.696466	-0.59665	-0.331807	-0.381764	-0.281947	-0.017104
ENSMUSG00000025789	1.34491	0.427506	0.892369	0.0309576	0.766846	7	73939119	74013690	-1	St8sia2	ST8 alpha-N-acetyl-neuraminide alpha-2,8-sialyltransferase 2 [Source:MGI Symbol;Acc:MGI:106020]	1.96189	1.86888	2.24044	1.87704	1.59385	1.02553	2.02374	1.49881	0.0637831	0.299734	0.935881	-0.00628652	0.229665	0.865811	0.255322	0.491273	1.12742
ENSMUSG00000029314	1.24995	0.321867	2.5623	0.0311914	0.77114	5	100845713	100899102	1	Gpat3	glycerol-3-phosphate acyltransferase 3 [Source:MGI Symbol;Acc:MGI:3603816]	6.83117	7.66559	7.04495	5.73995	6.23557	5.21812	7.18057	5.73121	0.251095	0.131611	0.388601	0.417359	0.297875	0.554866	0.295552	0.176068	0.433059
ENSMUSG00000042078	1.44433	0.530397	-0.142295	0.0316321	0.779016	5	114026910	114091570	-1	Svop	SV2 related protein [Source:MGI Symbol;Acc:MGI:1915916]	1.06368	1.01363	1.07043	1.00653	0.643131	0.512764	1.04925	0.720809	0.0796678	0.725876	1.05269	0.0101415	0.65635	0.983168	0.0888044	0.735013	1.06183
ENSMUSG00000042757	-1.34601	-0.42869	0.721949	0.0315841	0.779016	9	103482947	103761837	-1	Tmem108	transmembrane protein 108 [Source:MGI Symbol;Acc:MGI:1932411]	1.13459	1.52045	1.91682	2.36671	2.15309	1.59862	1.52395	2.03947	-1.06071	-0.924239	-0.494654	-0.638386	-0.501912	-0.0723273	-0.304164	-0.16769	0.261895
ENSMUSG00000015950	1.41615	0.501975	-0.057066	0.0318756	0.781402	5	134220053	134229625	-1	Ncf1	neutrophil cytosolic factor 1 [Source:MGI Symbol;Acc:MGI:97283]	0.827304	1.61548	1.02065	0.761699	0.922753	0.693739	1.15448	0.79273	0.119196	-0.157526	0.254025	1.08467	0.807943	1.21949	0.42219	0.145468	0.557019
ENSMUSG00000039126	-1.22412	-0.291744	3.86933	0.0319727	0.781402	19	16956118	17223932	1	Prune2	prune homolog 2 [Source:MGI Symbol;Acc:MGI:1925004]	15.0333	10.1363	14.9114	18.0087	15.519	15.6845	13.3603	16.4041	-0.260536	-0.0458762	-0.0611809	-0.829164	-0.614504	-0.629809	-0.272282	-0.057622	-0.0729268
ENSMUSG00000042751	-1.22295	-0.290371	4.12053	0.031974	0.781402	1	152954993	153119261	1	Nmnat2	nicotinamide nucleotide adenylyltransferase 2 [Source:MGI Symbol;Acc:MGI:2444155]	17.0188	13.4623	15.2848	20.7291	15.5749	19.7565	15.2553	18.6868	-0.284526	0.127904	-0.215194	-0.622733	-0.210303	-0.553401	-0.439559	-0.0271289	-0.370227
ENSMUSG00000054944	-1.43269	-0.518729	0.122436	0.0318756	0.781402	13	97733498	97747411	-1	5330416C01Rik	RIKEN cDNA 5330416C01 gene [Source:MGI Symbol;Acc:MGI:2685378]	0.78003	0.760224	0.84639	1.44179	0.866828	1.11601	0.795548	1.14154	-0.886258	-0.152217	-0.516755	-0.923363	-0.189322	-0.55386	-0.768465	-0.0344237	-0.398962
ENSMUSG00000029778	1.20985	0.274831	6.94771	0.0325924	0.787346	6	55451978	55501451	1	Adcyap1r1	adenylate cyclase activating polypeptide 1 receptor 1 [Source:MGI Symbol;Acc:MGI:108449]	129.059	98.7024	123.1	102.231	86.9345	100.924	116.954	96.6965	0.336204	0.570035	0.354767	-0.0506749	0.183156	-0.0321115	0.267998	0.50183	0.286562
ENSMUSG00000031486	1.21427	0.280087	5.21511	0.0325739	0.787346	8	27085583	27123436	1	Adgra2	adhesion G protein-coupled receptor A2 [Source:MGI Symbol;Acc:MGI:1925810]	33.2813	44.7582	40.6018	32.6443	36.0712	28.8957	39.5471	32.5371	0.027881	-0.116139	0.203854	0.455322	0.311302	0.631295	0.314715	0.170695	0.490688
ENSMUSG00000035722	-1.22753	-0.295755	3.70968	0.0324902	0.787346	10	79996494	80015572	1	Abca7	ATP-binding cassette, sub-family A (ABC1), member 7 [Source:MGI Symbol;Acc:MGI:1351646]	11.7004	11.9102	12.2727	15.1524	13.7294	15.1718	11.9611	14.6845	-0.372981	-0.23071	-0.374826	-0.34735	-0.205079	-0.349195	-0.304097	-0.161826	-0.305942
ENSMUSG00000041959	-1.2086	-0.273343	7.29371	0.032577	0.787346	3	93555080	93564643	1	S100a10	S100 calcium binding protein A10 (calpactin) [Source:MGI Symbol;Acc:MGI:1339468]	171.914	136.397	148.293	190.153	142.272	219.553	152.201	183.993	-0.145474	0.273037	-0.352886	-0.479349	-0.0608388	-0.686761	-0.358713	0.059797	-0.566125
ENSMUSG00000045658	1.21911	0.285825	4.40375	0.0325587	0.787346	1	84036296	84364180	-1	Pid1	phosphotyrosine interaction domain containing 1 [Source:MGI Symbol;Acc:MGI:2138391]	19.8553	25.9426	25.3419	18.444	23.5721	16.2576	23.7133	19.4246	0.106372	-0.247559	0.288408	0.492173	0.138242	0.674209	0.458373	0.104443	0.640409
ENSMUSG00000059743	-1.21185	-0.277216	5.70454	0.0326492	0.787346	3	89093588	89101959	-1	Fdps	farnesyl diphosphate synthetase [Source:MGI Symbol;Acc:MGI:104888]	50.8674	37.0926	49.3893	65.3429	39.0632	62.1952	45.7831	55.5338	-0.36129	0.380931	-0.290062	-0.8169	-0.0746794	-0.745673	-0.403831	0.33839	-0.332603
ENSMUSG00000095403	1.20919	0.274036	6.97326	0.0325336	0.787346	8	20567597	20582771	1	Gm21092	predicted gene, 21092 [Source:MGI Symbol;Acc:MGI:5434447]	132.652	144.284	128.328	113.52	156.7	64.8193	135.088	111.68	0.224698	-0.240357	1.03315	0.345961	-0.119094	1.15442	0.176881	-0.288175	0.985336
ENSMUSG00000071141	-1.22174	-0.288934	4.06548	0.0327182	0.78752	6	136488807	136489127	1	Rpl36a-ps3	ribosomal protein L36A, pseudogene 3 [Source:MGI Symbol;Acc:MGI:3642503]	16.0733	14.9194	17.0025	16.8934	22.7892	19.0024	15.9984	19.5617	-0.0717904	-0.503681	-0.241513	-0.179271	-0.611161	-0.348994	0.00928535	-0.422605	-0.160437
ENSMUSG00000056966	-1.41473	-0.500524	0.197391	0.0328762	0.789834	5	137953461	137963098	-1	Gjc3	gap junction protein, gamma 3 [Source:MGI Symbol;Acc:MGI:2153041]	0.874579	0.665196	0.771709	1.08814	0.559244	1.6891	0.770494	1.11216	-0.315207	0.64511	-0.949598	-0.710016	0.250301	-1.34441	-0.495739	0.464578	-1.13013
ENSMUSG00000037736	-1.22794	-0.296236	3.77278	0.0329384	0.789841	5	66745827	67057158	1	Limch1	LIM and calponin homology domains 1 [Source:MGI Symbol;Acc:MGI:1924819]	10.1877	13.7474	13.3929	16.8934	16.6375	12.1857	12.4426	15.2389	-0.729637	-0.707617	-0.258364	-0.297303	-0.275283	0.17397	-0.334994	-0.312974	0.13628
ENSMUSG00000000579	-1.25916	-0.332461	2.39793	0.0330129	0.790141	17	6601671	6609774	1	Dynlt1c	dynein light chain Tctex-type 1C [Source:MGI Symbol;Acc:MGI:3807476]	4.34926	4.56134	3.98301	4.95105	3.80286	7.51048	4.29787	5.42146	-0.186965	0.193684	-0.788136	-0.118275	0.262374	-0.719446	-0.313874	0.066775	-0.915045
ENSMUSG00000046733	-1.21146	-0.276747	5.57654	0.0332078	0.793317	6	135065651	135084709	1	Gprc5a	G protein-coupled receptor, family C, group 5, member A [Source:MGI Symbol;Acc:MGI:1891250]	51.7656	35.6355	39.7305	54.0262	38.0845	62.0746	42.3772	51.3951	-0.0616666	0.442789	-0.262008	-0.600346	-0.0958901	-0.800687	-0.443412	0.0610437	-0.643753
ENSMUSG00000016756	-1.23634	-0.306076	3.32309	0.033323	0.794582	13	24327420	24477285	1	Cmah	cytidine monophospho-N-acetylneuraminic acid hydroxylase [Source:MGI Symbol;Acc:MGI:103227]	8.84034	7.47553	7.21921	9.87489	9.75881	9.50121	7.84503	9.71163	-0.159663	-0.142604	-0.10401	-0.401588	-0.384529	-0.345934	-0.451924	-0.434864	-0.39627
ENSMUSG00000063558	-1.22098	-0.288035	4.23957	0.0333918	0.794737	1	58029931	58106413	1	Aox1	aldehyde oxidase 1 [Source:MGI Symbol;Acc:MGI:88035]	15.0333	16.4082	18.0729	21.7356	18.2034	20.5105	16.5048	20.1499	-0.531901	-0.276046	-0.448204	-0.405649	-0.149794	-0.321952	-0.266233	-0.0103783	-0.182536
ENSMUSG00000026494	1.21286	0.278414	4.99061	0.0335388	0.79592	1	178529125	178939200	1	Kif26b	kinesin family member 26B [Source:MGI Symbol;Acc:MGI:2447076]	23.59	42.6676	46.2527	32.5354	39.231	20.8423	37.5034	30.8696	-0.463838	-0.733818	0.178658	0.391127	0.121146	1.03362	0.507526	0.237545	1.15002
ENSMUSG00000027560	-1.26202	-0.335731	2.19461	0.0335663	0.79592	2	170731807	170879769	1	Dok5	docking protein 5 [Source:MGI Symbol;Acc:MGI:1924079]	4.6329	3.73777	3.51003	5.76715	4.13841	5.12764	3.96023	5.01106	-0.315943	0.162841	-0.146377	-0.625683	-0.146899	-0.456117	-0.716376	-0.237592	-0.546811
ENSMUSG00000054469	1.20805	0.272678	6.75085	0.0336361	0.796097	17	73107985	73243368	1	Lclat1	lysocardiolipin acyltransferase 1 [Source:MGI Symbol;Acc:MGI:2684937]	118.825	129.745	127.133	103.047	120.881	87.019	125.234	103.649	0.205529	-0.0247504	0.44943	0.332374	0.102094	0.576275	0.303033	0.072753	0.546934
ENSMUSG00000028369	1.20861	0.273353	6.41882	0.0337831	0.796619	4	58042442	58206859	-1	Svep1	sushi, von Willebrand factor type A, EGF and pentraxin domain containing 1 [Source:MGI Symbol;Acc:MGI:1928849]	78.6412	98.0689	101.318	87.4594	76.4766	66.0258	92.676	76.654	-0.153329	0.0402658	0.252254	0.165182	0.358776	0.570764	0.212203	0.405798	0.617786
ENSMUSG00000074997	-1.33101	-0.412525	0.696823	0.0337691	0.796619	2	104713926	104716379	-1	Pin1rt1	protein (peptidyl-prolyl cis/trans isomerase) NIMA-interacting 1, retrogene 1 [Source:MGI Symbol;Acc:MGI:3649546]	1.67825	1.20369	1.64299	2.66595	1.50996	1.90024	1.50831	2.02538	-0.667695	0.152444	-0.179229	-1.14719	-0.327048	-0.658722	-0.698323	0.121816	-0.209857
ENSMUSG00000037990	1.23524	0.304788	3.14476	0.0338728	0.797262	10	58813359	59138916	1	Sh3rf3	SH3 domain containing ring finger 3 [Source:MGI Symbol;Acc:MGI:2444637]	8.95852	10.073	9.55923	8.05225	8.05311	6.99771	9.53024	7.70103	0.153869	0.153714	0.356377	0.323024	0.32287	0.525533	0.247502	0.247347	0.45001
ENSMUSG00000021391	1.27312	0.348368	1.79415	0.0342059	0.798192	13	49464023	49652785	-1	Cenpp	centromere protein P [Source:MGI Symbol;Acc:MGI:1913586]	3.82924	3.99117	3.78386	3.69968	3.01992	2.35268	3.86809	3.02409	0.0496553	0.342547	0.702752	0.109412	0.402304	0.762508	0.0324577	0.32535	0.685554
ENSMUSG00000024663	1.22346	0.290967	3.63212	0.0340547	0.798192	19	10001669	10038380	1	Rab3il1	RAB3A interacting protein (rabin3)-like 1 [Source:MGI Symbol;Acc:MGI:1922010]	8.8167	17.1684	17.6995	12.1872	13.2541	10.1346	14.5615	11.8586	-0.467055	-0.588127	-0.200982	0.494389	0.373317	0.760462	0.538344	0.417272	0.804417
ENSMUSG00000025537	-1.28475	-0.361489	1.58037	0.0339799	0.798192	5	129863421	129898549	-1	Phkg1	phosphorylase kinase gamma 1 [Source:MGI Symbol;Acc:MGI:97579]	2.81283	2.91419	2.34002	3.12841	1.81754	5.45942	2.68901	3.46846	-0.153404	0.630035	-0.956724	-0.102333	0.681106	-0.905653	-0.418908	0.364531	-1.22223
ENSMUSG00000027007	1.20663	0.270979	7.32374	0.0342392	0.798192	2	79635352	79672966	1	Ssfa2	sperm specific antigen 2 [Source:MGI Symbol;Acc:MGI:1917849]	161.324	184.418	178.165	137.759	167.466	128.915	174.636	144.713	0.22782	-0.0539013	0.323546	0.420832	0.139111	0.516559	0.371071	0.0893496	0.466797
ENSMUSG00000090625	-1.3139	-0.393853	0.832779	0.0342286	0.798192	2	174330319	174346712	-1	Gm20721	predicted gene, 20721 [Source:MGI Symbol;Acc:MGI:5313030]	1.84371	1.80553	1.76746	2.50273	0.75498	3.92113	1.80557	2.39295	-0.440892	1.2881	-1.08866	-0.471077	1.25791	-1.11885	-0.501822	1.22717	-1.14959
ENSMUSG00000090852	-1.21597	-0.282105	4.56069	0.0342878	0.798192	NA	NA	NA	NA	NA	NA	24.0155	17.0734	18.6953	26.3058	18.5669	27.9607	19.928	24.2778	-0.131419	0.37123	-0.219437	-0.623636	-0.120986	-0.711653	-0.49271	0.00993939	-0.580728
ENSMUSG00000020689	-1.21213	-0.277539	5.31491	0.034484	0.801297	11	104608000	104670476	1	Itgb3	integrin beta 3 [Source:MGI Symbol;Acc:MGI:96612]	31.6739	34.9069	35.9716	43.3897	44.7955	36.0744	34.1841	41.4198	-0.454055	-0.500056	-0.18768	-0.313837	-0.359838	-0.0474625	-0.270494	-0.316495	-0.00411904
ENSMUSG00000074102	1.22981	0.298441	3.49011	0.034661	0.803946	9	106880918	106887428	-1	Rbm15b	RNA binding motif protein 15B [Source:MGI Symbol;Acc:MGI:1923598]	12.4332	11.2133	12.1482	9.38522	9.619	10.1346	11.9316	9.71295	0.405735	0.370239	0.294905	0.256748	0.221252	0.145919	0.372278	0.336782	0.261449
ENSMUSG00000056055	-1.32529	-0.406305	0.872512	0.0347257	0.803985	1	87803680	87845158	1	Sag	S-antigen, retina and pineal gland (arrestin) [Source:MGI Symbol;Acc:MGI:98227]	1.72552	1.33039	1.39405	1.82264	1.14645	3.01626	1.48332	1.99511	-0.0789965	0.589857	-0.805728	-0.454177	0.214677	-1.18091	-0.386741	0.282113	-1.11347
ENSMUSG00000032377	1.21525	0.281257	4.41221	0.0350375	0.809733	9	92457373	92492456	1	Plscr4	phospholipid scramblase 4 [Source:MGI Symbol;Acc:MGI:2143267]	18.1061	26.8929	25.6655	17.0294	28.0181	12.9699	23.5549	19.3392	0.0884498	-0.629881	0.481312	0.659197	-0.0591345	1.05206	0.591803	-0.126528	0.984665
ENSMUSG00000021614	-1.2042	-0.268078	9.46452	0.0351625	0.811155	13	89655312	89742509	-1	Vcan	versican [Source:MGI Symbol;Acc:MGI:102889]	640.428	519.106	625.881	785.176	680.432	684.479	595.138	716.696	-0.29398	-0.0874153	-0.09597	-0.596987	-0.390422	-0.398977	-0.327129	-0.120564	-0.129119
ENSMUSG00000082688	-1.47214	-0.557915	-0.440899	0.0354296	0.815841	11	35792781	35793459	1	Gm12124	predicted gene 12124 [Source:MGI Symbol;Acc:MGI:3651540]	0.638206	0.380112	0.697027	1.08814	0.391471	1.11601	0.571782	0.865209	-0.769772	0.705117	-0.806262	-1.51737	-0.0424808	-1.55386	-0.64258	0.83231	-0.67907
ENSMUSG00000086907	-1.24994	-0.321864	2.45553	0.0356101	0.81852	X	141900582	141902455	-1	Gm15298	predicted gene 15298 [Source:MGI Symbol;Acc:MGI:3705276]	5.48384	4.05453	3.70918	6.01198	4.05452	6.57544	4.41585	5.54731	-0.132653	0.435657	-0.261899	-0.568308	2.4862e-06	-0.697554	-0.696741	-0.128431	-0.825987
ENSMUSG00000086450	1.22691	0.295029	3.63722	0.0357314	0.81983	2	141230431	141286991	-1	Macrod2os1	MACRO domain containing 2, opposite strand 1 [Source:MGI Symbol;Acc:MGI:3650192]	13.9696	11.5934	12.0984	10.8542	10.0664	9.80283	12.5538	10.2411	0.364037	0.472746	0.511022	0.0950498	0.203758	0.242035	0.156561	0.265269	0.303545
ENSMUSG00000031673	1.20419	0.268059	7.60488	0.0359056	0.822349	8	102632095	102785642	-1	Cdh11	cadherin 11 [Source:MGI Symbol;Acc:MGI:99217]	179.832	243.398	233.877	166.567	223.809	155.217	219.036	181.864	0.110547	-0.315619	0.21237	0.547214	0.121048	0.649037	0.489648	0.0634817	0.591471
ENSMUSG00000082809	1.4378	0.523862	-0.127526	0.0361042	0.825415	2	151458956	151460309	1	Gm14150	predicted gene 14150 [Source:MGI Symbol;Acc:MGI:3651006]	1.25277	0.7919	1.5932	0.598478	0.307584	1.71927	1.21263	0.875109	1.06576	2.02607	-0.456666	0.404019	1.36434	-1.1184	1.41256	2.37288	-0.109861
ENSMUSG00000052557	-1.22491	-0.292676	3.36583	0.0364357	0.831502	8	117158135	117215997	1	Gan	giant axonal neuropathy [Source:MGI Symbol;Acc:MGI:1890619]	10.7786	8.48917	10.0571	12.5952	11.9119	11.4919	9.77495	11.9997	-0.22471	-0.144235	-0.0924533	-0.569184	-0.488709	-0.436927	-0.324664	-0.244188	-0.192407
ENSMUSG00000043099	1.21563	0.281699	4.24564	0.0365155	0.831837	11	75164565	75169519	-1	Hic1	hypermethylated in cancer 1 [Source:MGI Symbol;Acc:MGI:1338010]	17.397	22.9017	21.0353	17.1654	18.483	14.7193	20.4447	16.7893	0.0193339	-0.0873597	0.241129	0.415951	0.309257	0.637745	0.293304	0.186611	0.515099
ENSMUSG00000001020	-1.20211	-0.265575	9.24332	0.0369334	0.832853	3	90603771	90606045	1	S100a4	S100 calcium binding protein A4 [Source:MGI Symbol;Acc:MGI:1330282]	576.276	550.402	568.998	701.77	544.732	791.948	565.226	679.483	-0.284237	0.0812152	-0.458645	-0.350512	0.0149398	-0.52492	-0.302574	0.0628781	-0.476982
ENSMUSG00000029765	-1.20939	-0.274285	4.95707	0.0370612	0.832853	6	32144268	32588192	-1	Plxna4	plexin A4 [Source:MGI Symbol;Acc:MGI:2179061]	26.5683	30.7574	37.2661	42.4647	36.7423	35.1695	31.5306	38.1255	-0.67656	-0.467738	-0.404622	-0.465332	-0.25651	-0.193394	-0.188403	0.0204187	0.0835353
ENSMUSG00000030882	-1.22611	-0.294083	3.40213	0.0370824	0.832853	7	105650827	105721799	1	Dnhd1	dynein heavy chain domain 1 [Source:MGI Symbol;Acc:MGI:1924755]	9.90401	7.63391	8.78752	11.2623	9.14364	11.9745	8.77515	10.7935	-0.185412	0.115244	-0.273885	-0.561003	-0.260346	-0.649475	-0.35797	-0.0573127	-0.446442
ENSMUSG00000031595	1.22757	0.295802	3.09631	0.0367301	0.832853	8	40926212	40990785	1	Pdgfrl	platelet-derived growth factor receptor-like [Source:MGI Symbol;Acc:MGI:1916047]	6.80753	11.5617	11.6752	8.13386	9.53511	6.69609	10.0148	8.12169	-0.256809	-0.486118	0.0238131	0.507346	0.278036	0.787967	0.521435	0.292126	0.802057
ENSMUSG00000045667	1.3252	0.406208	0.585803	0.0366866	0.832853	11	72389164	72411713	-1	Smtnl2	smoothelin-like 2 [Source:MGI Symbol;Acc:MGI:2442764]	0.874579	2.40738	2.19066	1.22416	1.98532	0.814389	1.8242	1.34129	-0.485132	-1.18271	0.10287	0.975669	0.278092	1.56367	0.839572	0.141994	1.42757
ENSMUSG00000073471	-1.22344	-0.290949	3.50109	0.0368159	0.832853	17	7945653	7979824	1	Rsph3a	radial spoke 3A homolog (Chlamydomonas) [Source:MGI Symbol;Acc:MGI:1914082]	11.0386	10.8015	10.7043	12.4048	13.6735	13.7541	10.8482	13.2775	-0.168343	-0.308827	-0.317307	-0.199667	-0.340151	-0.348631	-0.212704	-0.353188	-0.361668
ENSMUSG00000078872	1.31503	0.395099	1.13229	0.037037	0.832853	2	177074320	177087347	1	Gm14401	predicted gene 14401 [Source:MGI Symbol;Acc:MGI:3650075]	2.2219	2.69246	1.91682	1.60501	2.32086	1.2065	2.27706	1.71079	0.469214	-0.0628658	0.880965	0.746343	0.214263	1.15809	0.256137	-0.275943	0.667887
ENSMUSG00000087095	-1.28564	-0.362484	1.43986	0.0369529	0.832853	19	59425104	59458635	-1	Emx2os	Emx2 opposite strand/antisense transcript (non-protein coding) [Source:MGI Symbol;Acc:MGI:3052329]	2.76556	2.66078	2.29023	2.93798	3.60712	3.37821	2.57219	3.30777	-0.0872547	-0.383278	-0.288686	-0.142975	-0.438998	-0.344407	-0.359333	-0.655356	-0.560764
ENSMUSG00000026950	-1.26332	-0.337223	1.97731	0.0374042	0.834725	2	52136647	52378474	-1	Neb	nebulin [Source:MGI Symbol;Acc:MGI:97292]	3.71105	3.42101	3.75897	5.68554	4.41803	3.64967	3.63034	4.58441	-0.61547	-0.251575	0.0240614	-0.732877	-0.368982	-0.093345	-0.596961	-0.233066	0.0425704
ENSMUSG00000040310	-1.36322	-0.447014	0.532644	0.037341	0.834725	2	93642384	93681339	1	Alx4	aristaless-like homeobox 4 [Source:MGI Symbol;Acc:MGI:108359]	1.06368	1.5838	1.1949	1.68662	1.70569	1.77959	1.28079	1.72397	-0.665075	-0.681299	-0.742486	-0.0907452	-0.10697	-0.168156	-0.497241	-0.513465	-0.574652
ENSMUSG00000078502	1.21629	0.282487	3.87483	0.037307	0.834725	4	145585166	145625345	1	Gm13212	predicted gene 13212 [Source:MGI Symbol;Acc:MGI:3651014]	14.2296	19.164	16.0565	12.5408	21.9783	5.97219	16.4834	13.4971	0.182265	-0.627181	1.25257	0.611763	-0.197683	1.68207	0.356525	-0.45292	1.42683
ENSMUSG00000095687	1.2194	0.286176	3.56294	0.0374275	0.834725	17	8128610	8148097	-1	Rnaset2a	ribonuclease T2A [Source:MGI Symbol;Acc:MGI:1915445]	10.0695	17.6119	13.8161	12.5408	11.8839	9.44088	13.8325	11.2886	-0.316645	-0.239025	0.0929947	0.489913	0.567534	0.899553	0.139714	0.217335	0.549354
ENSMUSG00000019850	-1.20486	-0.268867	5.67515	0.0379901	0.838477	10	19000910	19015657	-1	Tnfaip3	tumor necrosis factor, alpha-induced protein 3 [Source:MGI Symbol;Acc:MGI:1196377]	60.2041	42.5725	44.9085	50.9794	58.0775	69.0421	49.2284	59.3664	0.239946	0.0518825	-0.197615	-0.259993	-0.448057	-0.697554	-0.182929	-0.370992	-0.620489
ENSMUSG00000022679	-1.21782	-0.284298	3.81984	0.037983	0.838477	16	13903161	13949619	1	Mpv17l	Mpv17 transgene, kidney disease mutant-like [Source:MGI Symbol;Acc:MGI:2135951]	15.2224	13.8107	11.5507	19.3689	10.6536	19.4247	13.528	16.4824	-0.347548	0.514854	-0.351696	-0.487954	0.374449	-0.492102	-0.745759	0.116644	-0.749907
ENSMUSG00000042460	1.21095	0.276143	4.66533	0.0377233	0.838477	6	7844842	7875687	1	C1galt1	core 1 synthase, glycoprotein-N-acetylgalactosamine 3-beta-galactosyltransferase, 1 [Source:MGI Symbol;Acc:MGI:2151071]	25.7173	29.2686	25.2672	20.7291	29.1087	16.3481	26.7511	22.062	0.311084	-0.178707	0.653618	0.497697	0.00790626	0.840231	0.28561	-0.204181	0.628144
ENSMUSG00000057577	-1.28913	-0.366394	1.34444	0.0378382	0.838477	5	48924116	48924491	1	Gm10025	predicted gene 10025 [Source:MGI Symbol;Acc:MGI:3708717]	2.26918	1.74218	2.31513	3.26443	1.53792	3.43853	2.10883	2.74696	-0.52466	0.561188	-0.599624	-0.905936	0.179912	-0.9809	-0.495739	0.590109	-0.570702
ENSMUSG00000068587	-1.245	-0.316142	2.57186	0.0379427	0.838477	6	40628831	40769123	1	Mgam	maltase-glucoamylase [Source:MGI Symbol;Acc:MGI:1203495]	5.24747	5.19486	4.40621	6.47444	5.36874	6.63576	4.94951	6.15965	-0.303134	-0.0329618	-0.33864	-0.317671	-0.0474989	-0.353177	-0.555219	-0.285047	-0.590725
ENSMUSG00000073821	-1.25579	-0.328591	2.20194	0.0379775	0.838477	4	63979854	64149924	1	8030451A03Rik	RIKEN cDNA 8030451A03 gene [Source:MGI Symbol;Acc:MGI:1915353]	4.13652	4.11788	4.28174	5.3319	5.22893	5.18796	4.17871	5.2496	-0.366231	-0.338099	-0.32675	-0.372747	-0.344615	-0.333266	-0.316452	-0.28832	-0.276971
ENSMUSG00000024975	1.20803	0.27266	4.97761	0.0382007	0.838772	19	53892231	53929861	1	Pdcd4	programmed cell death 4 [Source:MGI Symbol;Acc:MGI:107490]	27.3247	38.3596	37.5399	28.2645	34.3655	22.7124	34.4081	28.4475	-0.0487862	-0.330759	0.266724	0.440598	0.158626	0.756108	0.409434	0.127461	0.724944
ENSMUSG00000027883	1.21462	0.280501	4.19655	0.0381815	0.838772	3	108678638	108722309	-1	Gpsm2	G-protein signalling modulator 2 (AGS3-like, C. elegans) [Source:MGI Symbol;Acc:MGI:1923373]	20.919	20.1776	19.9151	17.247	16.246	16.7402	20.3372	16.7444	0.278463	0.364724	0.321494	0.226405	0.312667	0.269436	0.20751	0.293772	0.250541
ENSMUSG00000042312	-1.20979	-0.274758	4.75126	0.0380948	0.838772	3	90514435	90524581	1	S100a13	S100 calcium binding protein A13 [Source:MGI Symbol;Acc:MGI:109581]	25.7883	23.2185	24.4457	31.6921	24.0195	33.209	24.4842	29.6402	-0.297411	0.102506	-0.364859	-0.44885	-0.0489334	-0.516299	-0.374542	0.0253746	-0.441991
ENSMUSG00000030276	-1.25495	-0.327632	2.11345	0.0383017	0.839545	6	113389260	113414587	1	Ttll3	tubulin tyrosine ligase-like family, member 3 [Source:MGI Symbol;Acc:MGI:2141418]	3.92379	2.91419	3.70918	4.86943	2.5166	5.97219	3.51572	4.45274	-0.311508	0.640771	-0.606013	-0.740659	0.21162	-1.03516	-0.392654	0.559625	-0.687159
ENSMUSG00000017057	1.20934	0.274225	4.55307	0.0384958	0.842352	X	36112110	36171259	1	Il13ra1	interleukin 13 receptor, alpha 1 [Source:MGI Symbol;Acc:MGI:105052]	21.8645	32.0878	26.7858	21.8444	29.9196	14.84	26.9127	22.2013	0.00132148	-0.452501	0.559099	0.554757	0.100935	1.11253	0.294199	-0.159623	0.851977
ENSMUSG00000036887	1.23994	0.310267	2.19121	0.0391544	0.855296	4	136895917	136898803	-1	C1qa	complement component 1, q subcomponent, alpha polypeptide [Source:MGI Symbol;Acc:MGI:88223]	3.92379	8.48917	5.00366	5.03266	5.45263	3.34804	5.80554	4.61111	-0.359074	-0.474706	0.228927	0.754303	0.63867	1.3423	-0.00833673	-0.123969	0.579665
ENSMUSG00000025137	-1.21885	-0.285525	3.61036	0.0394346	0.855536	11	120610087	120617936	-1	Pcyt2	phosphate cytidylyltransferase 2, ethanolamine [Source:MGI Symbol;Acc:MGI:1915921]	11.3932	9.47112	11.2022	13.1665	9.53511	16.4989	10.6888	13.0669	-0.208706	0.256846	-0.534204	-0.475267	-0.00971468	-0.800765	-0.233089	0.232463	-0.558587
ENSMUSG00000031450	-1.36777	-0.451822	0.621179	0.0393028	0.855536	8	13405081	13421951	1	Grk1	G protein-coupled receptor kinase 1 [Source:MGI Symbol;Acc:MGI:1345146]	1.0164	0.918604	1.2198	1.63221	1.09053	1.62878	1.0516	1.45051	-0.683358	-0.101553	-0.680319	-0.829315	-0.24751	-0.826276	-0.420188	0.161617	-0.417149
ENSMUSG00000064363	1.19912	0.261978	9.61385	0.0395007	0.855536	MT	10167	11544	1	mt-Nd4	mitochondrially encoded NADH dehydrogenase 4 [Source:MGI Symbol;Acc:MGI:102498]	919.726	852.844	702.006	631.585	832.323	599.722	824.859	687.877	0.542228	0.14406	0.616909	0.433306	0.035139	0.507988	0.152507	-0.24566	0.227189
ENSMUSG00000066233	1.33899	0.42114	0.695133	0.0394127	0.855536	9	123021326	123023705	1	Tmem42	transmembrane protein 42 [Source:MGI Symbol;Acc:MGI:1277176]	1.72552	2.02726	1.64299	1.25136	1.45403	1.29699	1.79859	1.33413	0.463531	0.24697	0.411864	0.696033	0.479472	0.644366	0.392825	0.176264	0.341158
ENSMUSG00000069303	-1.25622	-0.329091	2.09104	0.0393155	0.855536	13	21833743	21837530	1	Hist1h2br	histone cluster 1 H2br [Source:MGI Symbol;Acc:MGI:3710645]	3.9947	4.40296	3.2113	3.69968	3.13177	7.78194	3.86965	4.87113	0.110685	0.351109	-0.962044	0.251073	0.491498	-0.821655	-0.204243	0.0361821	-1.27697
ENSMUSG00000031289	-1.36734	-0.451372	0.626365	0.0395781	0.85576	X	147383476	147429192	-1	Il13ra2	interleukin 13 receptor, alpha 2 [Source:MGI Symbol;Acc:MGI:1277954]	1.04004	0.981956	1.36916	1.74103	1.84551	1.05569	1.13039	1.54741	-0.7433	-0.827378	-0.0215475	-0.826209	-0.910286	-0.104456	-0.346647	-0.430725	0.375106
ENSMUSG00000027220	-1.34794	-0.430753	0.895261	0.0398117	0.858204	2	92915098	92956058	1	Syt13	synaptotagmin XIII [Source:MGI Symbol;Acc:MGI:1933945]	1.08731	1.52045	1.54342	2.25789	1.45403	1.83992	1.38373	1.85062	-1.05421	-0.419293	-0.758871	-0.570482	0.0644344	-0.275144	-0.54885	0.0860663	-0.253512
ENSMUSG00000041482	-1.20502	-0.26906	5.4299	0.0398257	0.858204	18	63010213	63387183	-1	Piezo2	piezo-type mechanosensitive ion channel component 2 [Source:MGI Symbol;Acc:MGI:1918781]	32.2412	44.2197	43.614	50.1361	55.7287	38.6986	40.025	48.1878	-0.636944	-0.789513	-0.263374	-0.181162	-0.333731	0.192408	-0.20106	-0.353629	0.17251
ENSMUSG00000022629	-1.20855	-0.273272	4.56568	0.0401533	0.858918	15	90933276	91049948	-1	Kif21a	kinesin family member 21A [Source:MGI Symbol;Acc:MGI:109188]	22.3136	21.6664	23.0268	25.0001	29.6399	26.3621	22.3356	27.0007	-0.16401	-0.409621	-0.240542	-0.206474	-0.452084	-0.283006	-0.118618	-0.364229	-0.195151
ENSMUSG00000031438	-1.22727	-0.29545	3.1002	0.0400619	0.858918	X	139563316	139673145	1	Rnf128	ring finger protein 128 [Source:MGI Symbol;Acc:MGI:1914139]	8.72215	7.15877	7.34368	9.73887	10.6536	8.14389	7.74153	9.51212	-0.159071	-0.288585	0.0989653	-0.444042	-0.573557	-0.186006	-0.407252	-0.536766	-0.149216
ENSMUSG00000060572	1.27371	0.349037	1.56609	0.0399553	0.858918	4	141010418	141015984	1	Mfap2	microfibrillar-associated protein 2 [Source:MGI Symbol;Acc:MGI:99559]	1.65461	3.92782	4.05769	2.09467	2.60049	2.80512	3.21337	2.50009	-0.340235	-0.652291	-0.761572	0.907005	0.594949	0.485668	0.953935	0.641879	0.532598
ENSMUSG00000062040	1.21638	0.282595	3.77308	0.0401955	0.858918	7	29893333	29906572	-1	Zfp27	zinc finger protein 27 [Source:MGI Symbol;Acc:MGI:99174]	16.4752	15.1728	16.2308	12.4592	13.4778	13.4525	15.9596	13.1298	0.403079	0.28971	0.292419	0.284273	0.170904	0.173613	0.381517	0.268149	0.270857
ENSMUSG00000085436	-1.3502	-0.433171	0.583286	0.0401222	0.858918	2	164911354	164919953	1	Zfp335os	zinc finger protein 335, opposite strand [Source:MGI Symbol;Acc:MGI:3649775]	1.27641	1.26704	1.02065	1.68662	1.28626	1.83992	1.18803	1.60427	-0.402041	-0.0110897	-0.527546	-0.412673	-0.0217223	-0.538179	-0.724651	-0.3337	-0.850156
ENSMUSG00000040473	-1.27121	-0.346205	1.71269	0.040312	0.859968	5	5579278	5664239	-1	Cfap69	cilia and flagella associated protein 69 [Source:MGI Symbol;Acc:MGI:2443778]	3.35649	2.40738	2.26534	3.12841	3.38343	3.77032	2.6764	3.42738	0.101525	-0.0115313	-0.167733	-0.377968	-0.491024	-0.647226	-0.465702	-0.578759	-0.734961
ENSMUSG00000055912	1.20989	0.274873	4.40207	0.0403887	0.860165	6	72355447	72359762	1	Tmem150a	transmembrane protein 150A [Source:MGI Symbol;Acc:MGI:2385244]	19.9498	24.5489	24.2466	19.9402	18.3991	18.4293	22.9151	18.9229	0.000697905	0.11674	0.114375	0.299978	0.41602	0.413655	0.282102	0.398144	0.395778
ENSMUSG00000042857	1.29281	0.370509	1.3765	0.0404776	0.860622	13	94355839	94358923	-1	Gm9776	predicted gene 9776 [Source:MGI Symbol;Acc:MGI:3641792]	2.17463	2.78749	3.2362	1.98586	2.46067	1.87008	2.73277	2.10554	0.131006	-0.178285	0.21767	0.489202	0.179912	0.575866	0.704536	0.395246	0.7912
ENSMUSG00000078921	1.19799	0.260621	8.99118	0.0406548	0.86295	11	49057194	49064206	-1	Tgtp2	T cell specific GTPase 2 [Source:MGI Symbol;Acc:MGI:3710083]	504.112	640.172	554.087	450.627	559.216	407.738	566.123	472.527	0.161811	-0.149662	0.306103	0.506526	0.195053	0.650818	0.298179	-0.0132942	0.442471
ENSMUSG00000031871	1.2566	0.32953	2.02265	0.0409329	0.86741	8	104101625	104144511	1	Cdh5	cadherin 5 [Source:MGI Symbol;Acc:MGI:105057]	3.35649	4.97313	5.55132	2.3123	5.14505	3.55918	4.62698	3.67218	0.537624	-0.61623	-0.084592	1.10482	-0.0490296	0.482608	1.2635	0.109648	0.641286
ENSMUSG00000068606	1.20459	0.268537	4.94381	0.0411099	0.869715	18	60268301	60273267	-1	Gm4841	predicted gene 4841 [Source:MGI Symbol;Acc:MGI:3643814]	32.5958	40.4186	31.9637	26.2514	37.3855	23.4061	34.9927	29.0143	0.31229	-0.197792	0.477798	0.622622	0.11254	0.78813	0.284037	-0.226045	0.449545
ENSMUSG00000021403	-1.19711	-0.25956	8.71926	0.0415529	0.87203	13	33027416	33041884	1	Serpinb9b	serine (or cysteine) peptidase inhibitor, clade B, member 9b [Source:MGI Symbol;Acc:MGI:894668]	445.042	375.456	405.993	516.514	414.596	537.225	408.83	489.445	-0.214864	0.102238	-0.271585	-0.460165	-0.143063	-0.516886	-0.347351	-0.0302487	-0.404071
ENSMUSG00000026980	-1.20983	-0.274803	4.27831	0.0415469	0.87203	2	60292103	60383303	-1	Ly75	lymphocyte antigen 75 [Source:MGI Symbol;Acc:MGI:106662]	18.6971	13.0188	15.8325	19.641	19.0702	18.9421	15.8495	19.2178	-0.071053	-0.0285092	-0.0187829	-0.593266	-0.550722	-0.540995	-0.310979	-0.268435	-0.258709
ENSMUSG00000028370	-1.19909	-0.261945	6.77484	0.0415647	0.87203	4	65124174	65357509	1	Pappa	pregnancy-associated plasma protein A [Source:MGI Symbol;Acc:MGI:97479]	87.3633	90.9418	104.604	107.291	131.171	100.773	94.303	113.078	-0.296427	-0.586346	-0.206011	-0.238511	-0.528431	-0.148096	-0.0365904	-0.32651	0.053825
ENSMUSG00000034161	-1.43669	-0.522751	-0.346233	0.0415252	0.87203	15	76457438	76459468	1	Scx	scleraxis [Source:MGI Symbol;Acc:MGI:102934]	0.78003	0.760224	0.52277	0.816106	1.09053	1.05569	0.687675	0.987441	-0.0652284	-0.483423	-0.436585	-0.102333	-0.520528	-0.47369	-0.64258	-1.06078	-1.01394
ENSMUSG00000043633	-1.29915	-0.377572	0.963797	0.041503	0.87203	4	43659622	43669145	-1	Fam221b	family with sequence similarity 221, member B [Source:MGI Symbol;Acc:MGI:2441678]	1.70188	2.05894	1.99151	2.3123	1.0346	4.16243	1.91744	2.50311	-0.442198	0.718056	-1.2903	-0.167428	0.992826	-1.01553	-0.21547	0.944784	-1.06357
ENSMUSG00000057924	1.28973	0.36707	1.48469	0.0416294	0.87203	NA	NA	NA	NA	NA	NA	3.19103	3.00922	2.06619	2.17628	2.71233	1.47797	2.75548	2.12219	0.552156	0.234488	1.11041	0.467522	0.149854	1.02578	-0.0748956	-0.392564	0.483358
ENSMUSG00000061815	-1.30423	-0.383194	1.02703	0.0418656	0.874107	1	74125541	74148223	1	Rufy4	RUN and FYVE domain containing 4 [Source:MGI Symbol;Acc:MGI:3588214]	2.34009	1.42542	1.31937	2.23069	2.01328	2.47333	1.69496	2.2391	0.0690727	0.217016	-0.0798915	-0.646104	-0.49816	-0.795068	-0.757639	-0.609695	-0.906603
ENSMUSG00000075273	1.22015	0.287059	3.37396	0.0418565	0.874107	2	75935849	75938585	-1	Ttc30b	tetratricopeptide repeat domain 30B [Source:MGI Symbol;Acc:MGI:1919671]	9.99856	12.2269	11.3018	8.51471	10.8493	8.0534	11.1758	9.13915	0.231763	-0.117814	0.312122	0.522033	0.172456	0.602392	0.408523	0.0589454	0.488881
ENSMUSG00000090258	-1.20119	-0.264468	5.60792	0.0420011	0.875504	12	76765538	76783180	1	Churc1	churchill domain containing 1 [Source:MGI Symbol;Acc:MGI:1923684]	47.2982	46.3103	43.2904	60.3919	32.52	71.5758	45.6329	54.8292	-0.35257	0.540455	-0.597687	-0.383021	0.510004	-0.628138	-0.480309	0.412717	-0.725425
ENSMUSG00000045664	-1.20156	-0.264914	5.44714	0.0420904	0.875933	19	5917556	5924816	-1	Cdc42ep2	CDC42 effector protein (Rho GTPase binding) 2 [Source:MGI Symbol;Acc:MGI:1929744]	42.3107	38.3596	41.7718	54.5159	37.0499	55.6198	40.8141	49.0619	-0.365655	0.191552	-0.394575	-0.507089	0.0501181	-0.536009	-0.384147	0.17306	-0.413067
ENSMUSG00000021371	1.20625	0.27053	4.52109	0.0426635	0.886012	13	43538393	43560191	-1	Mcur1	mitochondrial calcium uniporter regulator 1 [Source:MGI Symbol;Acc:MGI:1923387]	24.7009	25.1824	27.6321	21.5452	23.8797	18.8214	25.8385	21.4155	0.197199	0.0487798	0.392189	0.225049	0.0766304	0.42004	0.35898	0.210561	0.553971
ENSMUSG00000036528	-1.23008	-0.298755	2.91765	0.0427136	0.886012	7	107595207	107748583	1	Ppfibp2	PTPRF interacting protein, binding protein 2 (liprin beta 2) [Source:MGI Symbol;Acc:MGI:894649]	5.76749	7.00039	7.39347	8.02505	7.88534	8.86779	6.72045	8.25939	-0.476566	-0.451229	-0.620631	-0.197074	-0.171737	-0.341139	-0.118259	-0.0929225	-0.262324
ENSMUSG00000019789	1.34181	0.42418	0.7186	0.0432019	0.891791	10	30832359	30842801	-1	Hey2	hairy/enhancer-of-split related with YRPW motif 2 [Source:MGI Symbol;Acc:MGI:1341884]	1.72552	1.52045	2.09108	1.19696	1.64977	1.14618	1.77902	1.33097	0.527661	0.0647663	0.590201	0.345126	-0.117769	0.407666	0.804879	0.341984	0.867419
ENSMUSG00000078503	1.36974	0.453905	0.351101	0.0430981	0.891791	4	145510759	145539188	1	Zfp990	zinc finger protein 990 [Source:MGI Symbol;Acc:MGI:3652161]	1.13459	1.55212	1.46874	0.516867	1.78958	0.693739	1.38515	1.00006	1.1343	-0.657453	0.709704	1.58638	-0.205379	1.16178	1.50671	-0.285047	1.08211
ENSMUSG00000094942	1.25014	0.322094	2.14311	0.0431559	0.891791	13	62368328	62383177	-1	Gm3604	predicted gene 3604 [Source:MGI Symbol;Acc:MGI:3781781]	4.822	4.81475	4.55557	3.01959	5.67633	2.62414	4.73077	3.77335	0.675278	-0.235326	0.877786	0.673107	-0.237497	0.875615	0.593277	-0.317326	0.795785
ENSMUSG00000051341	1.20568	0.269845	4.62798	0.0433156	0.892693	17	21555046	21562066	1	Zfp52	zinc finger protein 52 [Source:MGI Symbol;Acc:MGI:99199]	26.7101	25.4041	21.5083	19.6954	26.5641	14.7495	24.5408	20.3363	0.439529	0.00790815	0.85672	0.367207	-0.0644137	0.784398	0.127035	-0.304586	0.544226
ENSMUSG00000000627	-1.3774	-0.461948	-0.116629	0.0437118	0.898354	6	82911885	82939769	-1	Sema4f	sema domain, immunoglobulin domain (Ig), TM domain, and short cytoplasmic domain [Source:MGI Symbol;Acc:MGI:1340055]	1.15823	0.506816	0.746815	1.16975	0.727017	1.53829	0.803952	1.14502	-0.0142868	0.671855	-0.409412	-1.20667	-0.520528	-1.60179	-0.647381	0.0387606	-1.04251
ENSMUSG00000082794	-1.34897	-0.43186	0.580108	0.0437311	0.898354	X	68503126	68504131	1	Gm6806	predicted gene 6806 [Source:MGI Symbol;Acc:MGI:3649146]	1.30005	0.728548	1.09533	1.5234	0.894791	1.90024	1.04131	1.43948	-0.228727	0.538945	-0.547616	-1.0642	-0.296526	-1.38309	-0.47593	0.291741	-0.794819
ENSMUSG00000058126	1.43964	0.525705	0.115335	0.0439799	0.902011	14	113314608	113316713	1	Tpm3-rs7	tropomyosin 3, related sequence 7 [Source:MGI Symbol;Acc:MGI:99705]	1.34732	0.63352	1.26958	0.299239	0.810904	1.23667	1.08348	0.782269	2.17073	0.732494	0.123642	1.08209	-0.356141	-0.964993	2.08499	0.646754	0.0379022
ENSMUSG00000031825	1.30525	0.384326	0.82375	0.0446503	0.913865	8	119992438	120052793	1	Crispld2	cysteine-rich secretory protein LCCL domain containing 2 [Source:MGI Symbol;Acc:MGI:1926142]	1.70188	2.5024	1.99151	1.90425	1.70569	1.05569	2.06526	1.55521	-0.16209	-0.00322754	0.688946	0.394093	0.552955	1.24513	0.0646381	0.2235	0.915674
ENSMUSG00000072621	-1.20078	-0.263966	5.04855	0.0447011	0.913865	11	83028130	83040042	-1	Slfn10-ps	schlafen 10, pseudogene [Source:MGI Symbol;Acc:MGI:3512288]	30.1848	27.083	33.059	34.9294	40.7689	32.8169	30.1089	36.1717	-0.210619	-0.433647	-0.120616	-0.367054	-0.590083	-0.277052	-0.079397	-0.302426	0.0106054
ENSMUSG00000058258	-1.2021	-0.265558	4.73608	0.0448804	0.916063	13	8885501	8892451	1	Idi1	isopentenyl-diphosphate delta isomerase [Source:MGI Symbol;Acc:MGI:2442264]	26.4028	18.5938	24.6698	28.5365	29.2205	26.1208	23.2221	27.9593	-0.112117	-0.146289	0.0154942	-0.617987	-0.652159	-0.490376	-0.210065	-0.244236	-0.0824531
ENSMUSG00000027999	1.22201	0.289256	3.0944	0.0452252	0.921626	3	129878606	129895825	1	Pla2g12a	phospholipase A2, group XIIA [Source:MGI Symbol;Acc:MGI:1913600]	8.84034	9.5028	9.08625	8.10666	7.1024	7.20885	9.14313	7.47264	0.124994	0.315795	0.294332	0.229245	0.420046	0.398583	0.164577	0.355378	0.333915
ENSMUSG00000000915	-1.22039	-0.287342	3.0307	0.0457949	0.926098	5	123973628	124005558	1	Hip1r	huntingtin interacting protein 1 related [Source:MGI Symbol;Acc:MGI:1352504]	8.4385	7.44386	6.89559	9.82048	7.52183	10.4966	7.59265	9.27963	-0.218807	0.165903	-0.314859	-0.399743	-0.0150338	-0.495796	-0.51012	-0.12541	-0.606172
ENSMUSG00000005950	-1.23976	-0.310066	2.18134	0.045857	0.926098	11	73160421	73172685	1	P2rx5	purinergic receptor P2X, ligand-gated ion channel, 5 [Source:MGI Symbol;Acc:MGI:2137026]	4.72745	3.61106	4.55557	5.76715	4.75357	5.54991	4.29803	5.35688	-0.286796	-0.00794995	-0.231402	-0.675436	-0.396589	-0.620041	-0.340228	-0.0613814	-0.284833
ENSMUSG00000013701	-1.19507	-0.257091	6.43803	0.0460254	0.926098	14	32180162	32201898	-1	Timm23	translocase of inner mitochondrial membrane 23 [Source:MGI Symbol;Acc:MGI:1858317]	82.8013	85.1767	70.3002	96.9806	79.3567	108.404	79.4261	94.9139	-0.228043	0.0613012	-0.388695	-0.187237	0.102107	-0.34789	-0.464169	-0.174825	-0.624821
ENSMUSG00000025170	1.39182	0.476975	0.0907751	0.0459044	0.926098	11	121356125	121388251	-1	Rab40b	Rab40B, member RAS oncogene family [Source:MGI Symbol;Acc:MGI:2183451]	0.827304	1.4571	1.36916	0.788903	0.838866	0.965202	1.21785	0.864324	0.0685701	-0.0200228	-0.222413	0.885176	0.796583	0.594193	0.795372	0.706779	0.504389
ENSMUSG00000060314	-1.25029	-0.322262	2.02244	0.0455959	0.926098	7	140807449	140822178	-1	Zfp941	zinc finger protein 941 [Source:MGI Symbol;Acc:MGI:3039601]	4.06561	2.81916	3.08683	3.78129	4.66969	4.10211	3.32387	4.18436	0.104592	-0.199855	-0.0128942	-0.423613	-0.728059	-0.541099	-0.292752	-0.597198	-0.410238
ENSMUSG00000079018	-1.22181	-0.289021	3.42519	0.0458828	0.926098	15	75044018	75048830	-1	Ly6c1	lymphocyte antigen 6 complex, locus C1 [Source:MGI Symbol;Acc:MGI:96882]	6.45297	10.7698	9.06135	12.9217	10.4019	8.59633	8.76139	10.64	-1.00176	-0.688817	-0.413757	-0.262798	0.0501437	0.325204	-0.511996	-0.199054	0.0760054
ENSMUSG00000079659	1.28131	0.357621	1.21213	0.0460138	0.926098	5	9100668	9160986	1	Tmem243	transmembrane protein 243, mitochondrial [Source:MGI Symbol;Acc:MGI:3606159]	2.00917	3.23095	2.46449	2.09467	2.43271	1.38748	2.5682	1.97162	-0.0601275	-0.275968	0.534133	0.625234	0.409393	1.21949	0.234563	0.0187229	0.828824
ENSMUSG00000090386	-1.23347	-0.30272	2.58267	0.0457806	0.926098	16	77236317	77691403	1	Mir99ahg	Mir99a and Mirlet7c-1 host gene (non-protein coding) [Source:MGI Symbol;Acc:MGI:1919929]	5.29475	5.5433	5.05345	5.82156	7.63368	6.123	5.29716	6.52608	-0.136844	-0.527817	-0.209677	-0.070661	-0.461634	-0.143494	-0.204138	-0.595111	-0.276971
ENSMUSG00000034926	-1.19966	-0.262624	4.92015	0.0461545	0.927234	4	106561038	106589113	1	Dhcr24	24-dehydrocholesterol reductase [Source:MGI Symbol;Acc:MGI:1922004]	28.932	21.4446	29.773	37.5953	25.3617	33.3296	26.7166	32.0956	-0.377886	0.190014	-0.204139	-0.809935	-0.242035	-0.636188	-0.336547	0.231353	-0.1628
ENSMUSG00000092274	-1.19275	-0.25429	7.59626	0.0467505	0.93773	19	5824708	5845478	-1	Neat1	nuclear paraspeckle assembly transcript 1 (non-protein coding) [Source:MGI Symbol;Acc:MGI:1914211]	177.823	175.833	149.836	185.855	172.862	241.843	167.831	200.187	-0.0637318	0.0408192	-0.44363	-0.0799654	0.0245856	-0.459864	-0.310791	-0.20624	-0.69069
ENSMUSG00000071369	1.29582	0.37386	1.02884	0.0468531	0.938313	10	19934472	20142753	1	Map3k5	mitogen-activated protein kinase kinase kinase 5 [Source:MGI Symbol;Acc:MGI:1346876]	2.00917	2.59743	2.29023	1.36018	2.12513	1.80975	2.29894	1.76502	0.562803	-0.0809518	0.150804	0.933291	0.289536	0.521292	0.751699	0.107944	0.3397
ENSMUSG00000064370	1.19151	0.252787	9.58801	0.04697	0.93918	MT	14145	15288	1	mt-Cytb	mitochondrially encoded cytochrome b [Source:MGI Symbol;Acc:MGI:102501]	918.946	780.781	683.709	710.774	638.685	650.908	794.479	666.789	0.370588	0.524876	0.497526	0.135527	0.289815	0.262465	-0.0560094	0.0982782	0.0709283
ENSMUSG00000022803	1.24712	0.3186	1.82107	0.0471456	0.941214	16	38362209	38378216	1	Popdc2	popeye domain containing 2 [Source:MGI Symbol;Acc:MGI:1930150]	3.82924	5.47995	4.20706	3.29163	3.29954	4.1926	4.50541	3.59459	0.218255	0.214792	-0.130787	0.73536	0.731897	0.386318	0.354009	0.350546	0.00496722
ENSMUSG00000020644	1.19409	0.255917	6.43726	0.0472321	0.941468	12	25093799	25097140	-1	Id2	inhibitor of DNA binding 2 [Source:MGI Symbol;Acc:MGI:96397]	91.098	88.3127	88.4229	64.282	83.6629	76.3716	89.2778	74.7722	0.503005	0.122831	0.254383	0.458206	0.078032	0.209584	0.460005	0.0798311	0.211383
ENSMUSG00000058260	-1.29108	-0.368582	0.858485	0.0474627	0.944589	12	103994743	104013755	-1	Serpina9	serine (or cysteine) peptidase inhibitor, clade A (alpha-1 antiproteinase, antitrypsin), member 9 [Source:MGI Symbol;Acc:MGI:1919157]	1.82007	1.5838	1.79236	2.47552	1.56588	2.71463	1.73207	2.25201	-0.44374	0.217016	-0.576763	-0.644344	0.0164128	-0.777366	-0.465877	0.19488	-0.598899
ENSMUSG00000026580	-1.26231	-0.336068	1.91919	0.0476291	0.945452	1	164115264	164150026	1	Selp	selectin, platelet [Source:MGI Symbol;Acc:MGI:98280]	3.14376	2.66078	2.63875	3.8357	2.79622	4.07195	2.81443	3.56796	-0.287001	0.169011	-0.373229	-0.527639	-0.0716272	-0.613867	-0.539638	-0.083626	-0.625866
ENSMUSG00000042793	1.22628	0.294289	2.69743	0.0476543	0.945452	1	134983301	135105276	-1	Lgr6	leucine-rich repeat-containing G protein-coupled receptor 6 [Source:MGI Symbol;Acc:MGI:2441805]	5.10565	8.58419	7.6424	4.84223	7.35406	5.09747	7.11075	5.76459	0.0764222	-0.526447	0.00231199	0.82601	0.223142	0.7519	0.658354	0.0554856	0.584244
ENSMUSG00000007805	-1.20511	-0.269164	4.05966	0.0479645	0.945724	1	91801461	91848028	1	Twist2	twist basic helix-loop-helix transcription factor 2 [Source:MGI Symbol;Acc:MGI:104685]	15.6715	13.0822	14.3139	18.308	15.7148	17.9467	14.3559	17.3232	-0.22433	-0.00397646	-0.195577	-0.48487	-0.264517	-0.456117	-0.355052	-0.134698	-0.326299
ENSMUSG00000043631	1.2341	0.303462	2.22062	0.047788	0.945724	13	49504810	49532789	1	Ecm2	extracellular matrix protein 2, female organ and adipocyte specific [Source:MGI Symbol;Acc:MGI:3039578]	3.75832	6.36687	5.45175	4.05333	5.92799	2.50349	5.19232	4.1616	-0.109017	-0.657453	0.586147	0.651478	0.103043	1.34664	0.427612	-0.120824	1.12278
ENSMUSG00000053205	1.3464	0.429107	0.365107	0.0479325	0.945724	14	45351473	45373585	1	Styx	serine/threonine/tyrosine interaction protein [Source:MGI Symbol;Acc:MGI:1891150]	1.48915	1.4571	0.871284	1.30577	1.45403	0	1.27251	0.919935	0.189586	0.034425	#DIV/0!	0.158194	0.00303381	#DIV/0!	-0.583686	-0.738847	#DIV/0!
ENSMUSG00000070883	-1.31946	-0.399947	0.752569	0.047843	0.945724	2	69758033	69789575	-1	Ccdc173	coiled-coil domain containing 173 [Source:MGI Symbol;Acc:MGI:1923100]	1.65461	1.48877	1.14512	1.5234	2.0692	2.08122	1.4295	1.89127	0.119196	-0.322586	-0.330938	-0.0331712	-0.474953	-0.483305	-0.4118	-0.853582	-0.861934
ENSMUSG00000049281	1.31432	0.394321	0.700541	0.048067	0.946281	9	40269217	40291618	1	Scn3b	sodium channel, voltage-gated, type III, beta [Source:MGI Symbol;Acc:MGI:1918882]	1.91462	2.249	1.66789	1.46899	1.34219	1.59862	1.94383	1.46993	0.382231	0.512472	0.260233	0.614455	0.744696	0.492457	0.183195	0.313436	0.0611976
ENSMUSG00000027035	1.19098	0.252145	7.74807	0.0483548	0.948352	2	68861441	69114282	1	Cers6	ceramide synthase 6 [Source:MGI Symbol;Acc:MGI:2442564]	225.996	243.335	247.594	212.732	217.742	171.444	238.975	200.639	0.087261	0.0536787	0.398559	0.193908	0.160326	0.505206	0.218941	0.185359	0.530239
ENSMUSG00000027684	1.19232	0.253775	6.57811	0.0483894	0.948352	3	29951296	30548008	-1	Mecom	MDS1 and EVI1 complex locus [Source:MGI Symbol;Acc:MGI:95457]	95.5418	111.848	111.076	83.1612	107.235	76.6431	106.155	89.0131	0.200221	-0.166572	0.317977	0.427555	0.0607618	0.545311	0.417567	0.0507737	0.535323
ENSMUSG00000037001	1.21827	0.284837	3.13	0.0483951	0.948352	11	58888153	58904225	-1	Zfp39	zinc finger protein 39 [Source:MGI Symbol;Acc:MGI:99183]	8.60396	9.72453	9.6837	7.80742	8.38866	6.75641	9.3374	7.65083	0.140156	0.0365607	0.348744	0.316783	0.213188	0.525371	0.310712	0.207117	0.5193
ENSMUSG00000028565	1.1906	0.251692	7.40365	0.049024	0.957794	4	97772734	98118874	1	Nfia	nuclear factor I/A [Source:MGI Symbol;Acc:MGI:108056]	165.957	206.242	205.25	147.008	200.265	137.662	192.483	161.645	0.174917	-0.271101	0.269682	0.488446	0.0424282	0.583211	0.481485	0.0354667	0.57625
ENSMUSG00000051367	1.20887	0.273655	3.617	0.0490271	0.957794	12	73040015	73053887	-1	Six1	sine oculis-related homeobox 1 [Source:MGI Symbol;Acc:MGI:102780]	14.7969	13.9691	12.8452	9.63006	13.7854	11.0093	13.8704	11.4749	0.619681	0.10216	0.42657	0.536624	0.0191026	0.343513	0.415615	-0.101907	0.222503
ENSMUSG00000025723	-1.41551	-0.501322	0.0353005	0.0491486	0.958699	7	80902227	80905076	-1	Nmb	neuromedin B [Source:MGI Symbol;Acc:MGI:1915289]	0.661843	0.665196	0.771709	1.06094	0.866828	1.05569	0.699583	0.994485	-0.680779	-0.389257	-0.673624	-0.67349	-0.381967	-0.666335	-0.459213	-0.16769	-0.452058
ENSMUSG00000028364	-1.18918	-0.249971	11.0347	0.0492244	0.95871	4	63959785	64047015	-1	Tnc	tenascin C [Source:MGI Symbol;Acc:MGI:101922]	1825.69	1417.63	1794	2097.77	1754.85	2137.8	1679.11	1996.81	-0.200414	0.0570962	-0.227682	-0.565381	-0.307871	-0.59265	-0.225681	0.0318291	-0.25295
ENSMUSG00000032500	1.37175	0.456019	-0.253909	0.0494307	0.960767	9	111439081	111489118	1	Dclk3	doublecortin-like kinase 3 [Source:MGI Symbol;Acc:MGI:3039580]	0.330922	1.74218	1.39405	0.870514	1.0346	0.512764	1.15572	0.80596	-1.39538	-1.64451	-0.631804	1.00095	0.751818	1.76453	0.679348	0.430211	1.44292
ENSMUSG00000097392	-1.21832	-0.284893	3.0236	0.0494806	0.960767	5	104525735	104554207	1	D930016D06Rik	RIKEN cDNA D930016D06 gene [Source:MGI Symbol;Acc:MGI:2442700]	7.233	7.34883	6.82091	6.9097	9.64696	9.53137	7.13425	8.69601	0.0659713	-0.41548	-0.398089	0.0888912	-0.39256	-0.375169	-0.0186596	-0.500111	-0.48272
ENSMUSG00000024883	-1.19232	-0.253768	6.02633	0.0496279	0.962163	19	5050808	5057071	1	Rin1	Ras and Rab interactor 1 [Source:MGI Symbol;Acc:MGI:2385695]	68.2171	54.1659	53.2728	69.6139	55.8405	84.0932	58.552	69.8492	-0.0292407	0.288822	-0.301855	-0.361989	-0.0439264	-0.634604	-0.385976	-0.0679138	-0.658591
ENSMUSG00000036905	1.233	0.302174	2.09105	0.0498263	0.964158	4	136880129	136886187	-1	C1qb	complement component 1, q subcomponent, beta polypeptide [Source:MGI Symbol;Acc:MGI:88224]	4.08925	6.62028	4.53068	3.99892	4.50191	3.74016	5.08007	4.08033	0.032224	-0.138704	0.128736	0.727282	0.556354	0.823794	0.180115	0.00918749	0.276627
ENSMUSG00000053580	-1.19529	-0.257359	5.38421	0.0499257	0.964158	11	105589986	105929304	1	Tanc2	tetratricopeptide repeat, ankyrin repeat and coiled-coil containing 2 [Source:MGI Symbol;Acc:MGI:2444121]	33.8722	31.9611	32.0384	36.4528	40.685	39.8749	32.6239	39.0042	-0.105926	-0.264396	-0.23538	-0.189712	-0.348181	-0.319165	-0.186228	-0.344697	-0.315681
ENSMUSG00000055022	-1.2432	-0.314056	2.09436	0.0500446	0.964158	15	92051165	92341967	1	Cntn1	contactin 1 [Source:MGI Symbol;Acc:MGI:105980]	3.8056	3.45268	3.70918	4.27096	4.75357	4.64503	3.65582	4.55652	-0.166436	-0.320889	-0.287566	-0.306842	-0.461295	-0.427972	-0.203459	-0.357913	-0.324589
ENSMUSG00000072844	1.21544	0.281482	3.02469	0.0501843	0.964158	X	169975043	169978917	-1	G530011O06Rik	RIKEN cDNA G530011O06 gene [Source:MGI Symbol;Acc:MGI:3603513]	7.68211	11.1499	7.39347	8.13386	7.29814	6.00235	8.74184	7.14478	-0.0824377	0.0739747	0.355975	0.455025	0.611437	0.893438	-0.13769	0.0187229	0.300723
ENSMUSG00000079037	1.18968	0.250569	7.45812	0.0499766	0.964158	2	131909928	131938429	1	Prnp	prion protein [Source:MGI Symbol;Acc:MGI:97769]	193.447	211.311	211.523	187.596	174.624	155.759	205.427	172.66	0.0443145	0.147689	0.312621	0.171738	0.275113	0.440045	0.173187	0.276562	0.441493
ENSMUSG00000096954	-1.25319	-0.325603	1.91239	0.050124	0.964158	12	32821872	32826904	1	Gdap10	ganglioside-induced differentiation-associated-protein 10 [Source:MGI Symbol;Acc:MGI:1338008]	3.07284	2.69246	2.96236	3.34604	3.74694	3.89097	2.90922	3.66131	-0.122879	-0.286137	-0.340556	-0.313529	-0.476787	-0.531206	-0.175704	-0.338962	-0.393381
ENSMUSG00000027086	1.21751	0.28393	3.11251	0.0505034	0.96883	2	69686815	69713516	-1	Fastkd1	FAST kinase domains 1 [Source:MGI Symbol;Acc:MGI:2444596]	9.59673	9.12268	8.48879	6.9369	7.5498	7.87243	9.0694	7.45304	0.468251	0.346105	0.285734	0.395166	0.273021	0.21265	0.291268	0.169122	0.108751
ENSMUSG00000046203	-1.29567	-0.373699	1.08944	0.0508011	0.969869	3	92373915	92375229	1	Sprr2g	small proline-rich protein 2G [Source:MGI Symbol;Acc:MGI:1330348]	1.98553	1.10866	1.51852	2.39391	1.482	2.20187	1.53757	2.02593	-0.269846	0.421982	-0.149203	-1.11055	-0.418726	-0.989911	-0.656701	0.0351266	-0.536058
ENSMUSG00000071047	-1.34277	-0.425211	0.293435	0.0508617	0.969869	8	93020214	93048192	-1	Ces1a	carboxylesterase 1A [Source:MGI Symbol;Acc:MGI:3648919]	0.94549	1.17201	1.12022	1.38738	1.17441	1.77959	1.07924	1.44713	-0.553229	-0.312805	-0.912411	-0.243377	-0.00295248	-0.602559	-0.308579	-0.0681546	-0.667761
ENSMUSG00000090084	1.34985	0.432796	0.0185768	0.0508272	0.969869	X	10037977	10117709	-1	Srpx	sushi-repeat-containing protein [Source:MGI Symbol;Acc:MGI:1858306]	0.496382	1.67883	1.29448	0.897717	1.20237	0.361951	1.15656	0.820681	-0.854809	-1.27636	0.455659	0.903121	0.481567	2.21359	0.528039	0.106485	1.83851
ENSMUSG00000091387	1.21109	0.276303	3.59455	0.0507804	0.969869	13	96924689	96950906	1	Gcnt4	glucosaminyl (N-acetyl) transferase 4, core 2 (beta-1,6-N-acetylglucosaminyltransferase) [Source:MGI Symbol;Acc:MGI:2684919]	10.8731	11.245	11.8992	8.4331	10.9612	8.68682	11.3391	9.36037	0.366634	-0.011635	0.323869	0.415146	0.0368769	0.372381	0.496735	0.118467	0.453971
ENSMUSG00000023045	-1.32303	-0.403847	0.704196	0.0510203	0.970205	15	102150526	102163474	1	Soat2	sterol O-acyltransferase 2 [Source:MGI Symbol;Acc:MGI:1332226]	1.15823	1.67883	1.31937	1.95866	1.20237	2.29235	1.38548	1.81779	-0.757947	-0.0539701	-0.984914	-0.22241	0.481567	-0.449376	-0.570012	0.133965	-0.796978
ENSMUSG00000032128	-1.38174	-0.466483	0.127104	0.0510314	0.970205	9	37415669	37433246	-1	Robo3	roundabout guidance receptor 3 [Source:MGI Symbol;Acc:MGI:1343102]	0.94549	0.95028	0.821496	1.36018	0.978677	1.41764	0.905755	1.25216	-0.52466	-0.0497701	-0.584357	-0.517371	-0.0424808	-0.577068	-0.727469	-0.252579	-0.787166
ENSMUSG00000028434	-1.35003	-0.432996	0.482929	0.0516669	0.977569	4	56991972	57143437	-1	Epb41l4b	erythrocyte membrane protein band 4.1 like 4b [Source:MGI Symbol;Acc:MGI:1859149]	0.921853	1.36207	1.2198	1.63221	1.56588	1.47797	1.16791	1.55869	-0.82422	-0.764368	-0.681004	-0.261031	-0.201179	-0.117814	-0.420188	-0.360335	-0.276971
ENSMUSG00000030124	1.31569	0.395818	0.493171	0.0517604	0.977569	6	124904361	124911705	-1	Lag3	lymphocyte-activation gene 3 [Source:MGI Symbol;Acc:MGI:106588]	1.13459	2.15397	2.04129	1.22416	1.76162	0.995365	1.77662	1.32705	-0.109622	-0.634733	0.188872	0.815205	0.290094	1.1137	0.737692	0.212582	1.03619
ENSMUSG00000031750	-1.22588	-0.293818	2.52626	0.0517565	0.977569	8	110741829	110805924	-1	Il34	interleukin 34 [Source:MGI Symbol;Acc:MGI:1923777]	5.43657	4.71972	5.10323	7.20894	4.66969	6.87706	5.08651	6.2519	-0.40709	0.219371	-0.339096	-0.611085	0.0153758	-0.543091	-0.498375	0.128086	-0.430381
ENSMUSG00000040860	-1.25262	-0.324946	1.78785	0.0518019	0.977569	4	141016637	141060550	-1	Crocc	ciliary rootlet coiled-coil, rootletin [Source:MGI Symbol;Acc:MGI:3529431]	2.7892	2.69246	3.06194	3.12841	3.71897	3.89097	2.84787	3.57945	-0.165579	-0.415055	-0.48028	-0.216504	-0.46598	-0.531206	-0.0309825	-0.280458	-0.345684
ENSMUSG00000097331	-1.33399	-0.415751	0.329157	0.0515491	0.977569	10	127195249	127202643	1	F420014N23Rik	RIKEN cDNA F420014N23 gene [Source:MGI Symbol;Acc:MGI:3642477]	1.27641	0.855252	0.970859	1.25136	0.894791	2.08122	1.03417	1.40912	0.0285937	0.512472	-0.705333	-0.54908	-0.0652009	-1.28301	-0.366167	0.117712	-1.10009
ENSMUSG00000028710	1.20857	0.273296	3.47019	0.0520321	0.979844	4	115784812	115818828	1	Atpaf1	ATP synthase mitochondrial F1 complex assembly factor 1 [Source:MGI Symbol;Acc:MGI:2180560]	11.2986	11.5617	11.5258	11.5343	9.50715	7.35967	11.4621	9.46704	-0.0297855	0.249061	0.618433	0.00342708	0.282273	0.651646	-0.00105903	0.277787	0.64716
ENSMUSG00000033174	1.28341	0.359985	1.13445	0.0520761	0.979844	6	88724412	88828360	1	Mgll	monoglyceride lipase [Source:MGI Symbol;Acc:MGI:1346042]	2.411	2.72414	2.11597	1.98586	1.76162	1.87008	2.41704	1.87252	0.279869	0.45273	0.366533	0.456035	0.628896	0.542699	0.0915594	0.264421	0.178223
ENSMUSG00000057858	-1.19954	-0.262483	4.17285	0.0521668	0.980105	19	60198586	60226697	-1	Fam204a	family with sequence similarity 204, member A [Source:MGI Symbol;Acc:MGI:1289174]	17.5388	16.1548	15.8574	15.3972	23.5721	20.5105	16.517	19.8266	0.187885	-0.426529	-0.225812	0.0692901	-0.545124	-0.344407	0.0424844	-0.57193	-0.371213
ENSMUSG00000058248	1.35352	0.436714	0.238549	0.0523417	0.981946	1	192190774	192510159	1	Kcnh1	potassium voltage-gated channel, subfamily H (eag-related), member 1 [Source:MGI Symbol;Acc:MGI:1341721]	0.921853	1.42542	1.41895	0.924921	0.978677	0.844552	1.25541	0.91605	-0.00479252	-0.086296	0.126351	0.623985	0.542482	0.755129	0.61742	0.535917	0.748564
ENSMUSG00000020601	1.18884	0.24956	6.48934	0.0525402	0.983342	12	15791727	15816922	-1	Trib2	tribbles pseudokinase 2 [Source:MGI Symbol;Acc:MGI:2145021]	103.531	98.8291	95.418	82.6988	91.9677	75.7985	99.2594	83.4883	0.324128	0.170867	0.449824	0.25707	0.103809	0.382766	0.206396	0.0531347	0.332092
ENSMUSG00000068101	1.27278	0.347979	1.427	0.0525703	0.983342	15	82233779	82244747	-1	Cenpm	centromere protein M [Source:MGI Symbol;Acc:MGI:1913820]	2.52919	2.94587	3.28598	2.66595	1.70569	2.50349	2.92035	2.29171	-0.0759748	0.568314	0.0147315	0.144044	0.788333	0.23475	0.301677	0.945967	0.392384
ENSMUSG00000000001	1.00175	0.00252147	7.65173	0.984643	1	3	108107280	108146146	-1	Gnai3	guanine nucleotide binding protein (G protein), alpha inhibiting 3 [Source:MGI Symbol;Acc:MGI:95773]	206.33	192.147	194.147	190.098	231.219	170.268	197.541	197.195	0.118205	-0.164312	0.277147	0.0154608	-0.267056	0.174403	0.0304026	-0.252114	0.189344
ENSMUSG00000000028	-1.03808	-0.0539123	4.63763	0.684844	1	16	18780447	18811987	-1	Cdc45	cell division cycle 45 [Source:MGI Symbol;Acc:MGI:1338073]	27.4665	22.8384	22.6783	27.6388	20.5522	27.6289	24.3277	25.2733	-0.00902223	0.418379	-0.00850551	-0.275234	0.152167	-0.274718	-0.285384	0.142017	-0.284868
ENSMUSG00000000031	1.09463	0.130448	-0.0361363	0.557165	1	7	142575529	142578143	-1	H19	H19, imprinted maternally expressed transcript [Source:MGI Symbol;Acc:MGI:95891]	0.638206	1.33039	1.04554	1.03373	0.978677	0.663576	1.00471	0.891996	-0.695772	-0.616811	-0.0562402	0.363985	0.442946	1.00352	0.0163829	0.0953441	0.655915
ENSMUSG00000000037	-1.06462	-0.0903344	1.99201	0.584075	1	X	161117193	161258213	1	Scml2	sex comb on midleg-like 2 (Drosophila) [Source:MGI Symbol;Acc:MGI:1340042]	4.49108	4.05453	3.31088	3.69968	4.50191	4.4339	3.95216	4.21183	0.279661	-0.00347647	0.0184872	0.132132	-0.151005	-0.129042	-0.160187	-0.443325	-0.421361
ENSMUSG00000000056	-1.03404	-0.0482985	4.4148	0.725609	1	11	121237253	121255856	1	Narf	nuclear prelamin A recognition factor [Source:MGI Symbol;Acc:MGI:1914858]	17.3261	22.1415	22.8027	20.8107	23.0409	20.4804	20.7568	21.444	-0.264378	-0.411246	-0.241294	0.0894276	-0.0574403	0.112512	0.131881	-0.014987	0.154965
ENSMUSG00000000058	-1.06889	-0.096108	5.51462	0.460646	1	6	17281185	17289115	1	Cav2	caveolin 2 [Source:MGI Symbol;Acc:MGI:107571]	51.0328	44.188	43.8131	39.0099	67.6406	41.9863	46.3447	49.5456	0.387586	-0.406463	0.281508	0.179815	-0.614234	0.0737366	0.167523	-0.626526	0.0614451
ENSMUSG00000000078	-1.0173	-0.0247426	8.22471	0.846125	1	13	5861482	5870394	1	Klf6	Kruppel-like factor 6 [Source:MGI Symbol;Acc:MGI:1346318]	334.396	277.608	282.196	271.682	362.194	275.837	298.067	303.238	0.299641	-0.115205	0.277745	0.031133	-0.383713	0.00923702	0.0547814	-0.360065	0.0328854
ENSMUSG00000000085	1.0302	0.0429228	6.25165	0.740669	1	4	120405281	120530186	1	Scmh1	sex comb on midleg homolog 1 [Source:MGI Symbol;Acc:MGI:1352762]	78.6412	76.3391	78.8885	74.2657	71.2757	81.4992	77.9563	75.6802	0.082589	0.141875	-0.0515019	0.0397271	0.0990133	-0.0943638	0.0871197	0.146406	-0.0469712
ENSMUSG00000000088	-1.07569	-0.105262	6.06484	0.416041	1	9	57521274	57532426	1	Cox5a	cytochrome c oxidase subunit Va [Source:MGI Symbol;Acc:MGI:88474]	66.3498	65.601	62.832	73.2592	64.5088	71.7567	64.9276	69.8416	-0.142917	0.0405959	-0.113022	-0.159292	0.0242211	-0.129397	-0.221509	-0.0379964	-0.191615
ENSMUSG00000000093	-1.07344	-0.102239	1.87965	0.544461	1	11	85832551	85841948	1	Tbx2	T-box 2 [Source:MGI Symbol;Acc:MGI:98494]	3.38013	4.11788	3.43535	3.97172	3.43935	4.28308	3.64445	3.89805	-0.232685	-0.0250584	-0.341572	0.0521381	0.259765	-0.0567486	-0.209307	-0.00168032	-0.318194
ENSMUSG00000000126	-1.17712	-0.235258	1.95977	0.141992	1	11	59306928	59333552	1	Wnt9a	wingless-type MMTV integration site family, member 9A [Source:MGI Symbol;Acc:MGI:2446084]	4.06561	3.92782	3.75897	5.14147	4.78154	3.89097	3.91747	4.60466	-0.33871	-0.234003	0.0633414	-0.388451	-0.283745	0.0135998	-0.451845	-0.347138	-0.0497937
ENSMUSG00000000127	-1.01052	-0.0150965	5.80418	0.908877	1	17	63896018	64139494	1	Fer	fer (fms/fps related) protein kinase [Source:MGI Symbol;Acc:MGI:105917]	54.1766	54.261	56.4592	54.2711	60.5661	51.7891	54.9656	55.5421	-0.0025136	-0.160841	0.0650209	-0.00026871	-0.158597	0.0672658	0.0570249	-0.101303	0.124559
ENSMUSG00000000131	1.00034	0.000489077	6.86773	0.998117	1	7	126101715	126200501	-1	Xpo6	exportin 6 [Source:MGI Symbol;Acc:MGI:2429950]	117.666	109.06	114.312	118.58	103.656	118.72	113.68	113.652	-0.0111629	0.182899	-0.0128601	-0.120736	0.0733256	-0.122433	-0.0528815	0.14118	-0.0545787
ENSMUSG00000000134	1.02838	0.0403716	6.07245	0.755367	1	X	7762560	7775202	1	Tfe3	transcription factor E3 [Source:MGI Symbol;Acc:MGI:98511]	65.4752	70.8275	66.2176	66.9479	61.4609	68.4992	67.5068	65.636	-0.0320906	0.0912794	-0.0651378	0.0812704	0.20464	0.0482232	-0.0158254	0.107545	-0.0488726
ENSMUSG00000000148	1.0946	0.130399	3.94678	0.343112	1	5	140705011	140719379	1	Brat1	BRCA1-associated ATM activator 1 [Source:MGI Symbol;Acc:MGI:1891679]	15.9315	16.2815	16.5544	14.6083	13.282	16.6799	16.2558	14.8567	0.125095	0.262406	-0.066227	0.156441	0.293752	-0.0348804	0.180425	0.317737	-0.0108963
ENSMUSG00000000149	-1.00957	-0.0137413	6.36566	0.915639	1	5	140758408	140830431	-1	Gna12	guanine nucleotide binding protein, alpha 12 [Source:MGI Symbol;Acc:MGI:95767]	78.6175	77.4161	85.5601	86.3713	73.7643	83.7916	80.5312	81.3091	-0.1357	0.0919284	-0.0919545	-0.157917	0.0697113	-0.114172	-0.0136137	0.214015	0.0301321
ENSMUSG00000000154	1.09967	0.137067	1.26071	0.429574	1	7	143473736	143499334	1	Slc22a18	solute carrier family 22 (organic cation transporter), member 18 [Source:MGI Symbol;Acc:MGI:1336884]	1.70188	2.72414	2.51428	2.88358	1.62181	1.71927	2.31343	2.07488	-0.760727	0.0695288	-0.0146611	-0.0820608	0.748195	0.664005	-0.197716	0.63254	0.54835
ENSMUSG00000000167	1.09821	0.13515	0.512152	0.517512	1	9	50617321	50625000	1	Pih1d2	PIH1 domain containing 2 [Source:MGI Symbol;Acc:MGI:1919864]	1.51278	1.48877	1.26958	1.5506	1.20237	1.11601	1.42371	1.28966	-0.0356219	0.33132	0.438851	-0.0587063	0.308236	0.415766	-0.288472	0.0784703	0.186001
ENSMUSG00000000168	-1.03427	-0.0486145	5.95507	0.707523	1	9	50634633	50659780	-1	Dlat	dihydrolipoamide S-acetyltransferase (E2 component of pyruvate dehydrogenase complex) [Source:MGI Symbol;Acc:MGI:2385311]	63.6315	57.4602	59.5709	58.6508	66.0747	62.165	60.2209	62.2969	0.117589	-0.0543564	0.0336378	-0.0295878	-0.201534	-0.113539	0.0224563	-0.14949	-0.0614953
ENSMUSG00000000171	1.02683	0.0381983	6.65111	0.767029	1	9	50596357	50603812	-1	Sdhd	succinate dehydrogenase complex, subunit D, integral membrane protein [Source:MGI Symbol;Acc:MGI:1914175]	103.578	101.3	103.907	107.508	91.2966	101.919	102.928	100.241	-0.0537254	0.182091	0.0232971	-0.0858181	0.149999	-0.00879571	-0.0491593	0.186657	0.0278631
ENSMUSG00000000184	-1.07352	-0.102354	10.4115	0.42057	1	6	127125162	127152193	-1	Ccnd2	cyclin D2 [Source:MGI Symbol;Acc:MGI:88314]	1359.21	1310.37	1369.68	1447.5	1494.86	1393.9	1346.42	1445.42	-0.0907921	-0.137238	-0.0363576	-0.143587	-0.190033	-0.0891528	-0.079722	-0.126168	-0.0252875
ENSMUSG00000000194	1.02148	0.0306628	6.8608	0.811395	1	2	31152316	31218775	1	Gpr107	G protein-coupled receptor 107 [Source:MGI Symbol;Acc:MGI:2139054]	110.457	121.351	124.071	115.887	118.951	113.532	118.626	116.123	-0.0692363	-0.106886	-0.0396137	0.0664625	0.0288126	0.0960851	0.0984437	0.0607938	0.128066
ENSMUSG00000000223	-1.01765	-0.0252387	2.42191	0.92114	1	X	134404551	134456573	1	Drp2	dystrophin related protein 2 [Source:MGI Symbol;Acc:MGI:107432]	3.94742	6.30352	5.37707	5.22308	6.12372	4.4339	5.20934	5.26023	-0.40399	-0.633498	-0.167664	0.271257	0.0417491	0.507583	0.041918	-0.18759	0.278244
ENSMUSG00000000253	-1.20456	-0.268504	1.8	0.107205	1	13	45507444	45553800	1	Gmpr	guanosine monophosphate reductase [Source:MGI Symbol;Acc:MGI:1913605]	2.95466	2.88252	3.48514	3.75409	2.82418	4.70536	3.10744	3.76121	-0.345472	0.0651576	-0.671314	-0.381135	0.0294947	-0.706977	-0.107248	0.303381	-0.43309
ENSMUSG00000000266	1.01901	0.0271643	5.13848	0.836943	1	X	140664599	140767715	1	Mid2	midline 2 [Source:MGI Symbol;Acc:MGI:1344333]	36.685	35.8572	37.5399	34.5757	45.0471	28.383	36.694	36.0019	0.0854326	-0.296243	0.370166	0.0525048	-0.329171	0.337238	0.118665	-0.26301	0.403399
ENSMUSG00000000275	1.01536	0.0219879	8.39925	0.863206	1	11	88999376	89020293	1	Trim25	tripartite motif-containing 25 [Source:MGI Symbol;Acc:MGI:102749]	339.313	345.997	349.211	329	346.955	342.918	344.84	339.624	0.04453	-0.0321325	-0.0152481	0.0726725	-0.00398987	0.0128945	0.0860109	0.00934847	0.0262328
ENSMUSG00000000276	-1.00097	-0.00139924	3.6949	0.996896	1	11	89035179	89066850	-1	Dgke	diacylglycerol kinase, epsilon [Source:MGI Symbol;Acc:MGI:1889276]	13.5442	12.322	11.3018	11.1535	14.1768	11.884	12.3893	12.4048	0.280179	-0.0658658	0.188643	0.143741	-0.202304	0.0522052	0.0190614	-0.326984	-0.0724745
ENSMUSG00000000278	-1.01844	-0.0263611	7.39133	0.837358	1	11	88924020	88955465	-1	Scpep1	serine carboxypeptidase 1 [Source:MGI Symbol;Acc:MGI:1921867]	151.893	167.091	171.07	175.164	157.315	166.588	163.351	166.356	-0.205648	-0.0506038	-0.133227	-0.0680707	0.0869731	0.00434967	-0.0341136	0.12093	0.0383068
ENSMUSG00000000282	1.00304	0.00437434	4.38638	0.972743	1	11	74830920	74845725	1	Mnt	max binding protein [Source:MGI Symbol;Acc:MGI:109150]	18.7207	23.3452	21.11	21.382	21.1394	20.3899	21.0586	20.9704	-0.191761	-0.175301	-0.123219	0.12673	0.14319	0.195272	-0.018472	-0.00201224	0.0500699
ENSMUSG00000000290	-1.01632	-0.0233589	1.23033	0.953266	1	10	77530252	77565708	1	Itgb2	integrin beta 2 [Source:MGI Symbol;Acc:MGI:96611]	1.86734	3.13592	2.66364	2.82917	2.57252	2.29235	2.55564	2.56468	-0.599391	-0.462196	-0.295843	0.148512	0.285706	0.45206	-0.0869797	0.0502148	0.216568
ENSMUSG00000000295	-1.12167	-0.165645	3.40335	0.238412	1	10	31313383	31328204	1	Hddc2	HD domain containing 2 [Source:MGI Symbol;Acc:MGI:1916942]	10.8731	9.88291	9.70859	11.9968	8.94791	13.2715	10.1549	11.4054	-0.141877	0.281147	-0.287566	-0.279638	0.143386	-0.425327	-0.305311	0.117712	-0.451001
ENSMUSG00000000296	-1.2147	-0.280597	1.09715	0.14444	1	10	31332376	31445958	-1	Tpd52l1	tumor protein D52-like 1 [Source:MGI Symbol;Acc:MGI:1298386]	1.98553	1.93224	1.79236	2.69315	2.2929	1.9304	1.90337	2.30549	-0.439771	-0.20765	0.0406213	-0.479024	-0.246903	0.00136804	-0.587439	-0.355317	-0.107046
ENSMUSG00000000301	1.14012	0.189181	1.04604	0.353432	1	11	59970614	60046489	-1	Pemt	phosphatidylethanolamine N-methyltransferase [Source:MGI Symbol;Acc:MGI:104535]	2.15099	1.86888	2.21555	1.57781	1.76162	2.1717	2.07847	1.83704	0.447082	0.2881	-0.0138264	0.244257	0.0852747	-0.216651	0.489745	0.330763	0.0288373
ENSMUSG00000000317	1.01164	0.0166905	0.173453	0.957487	1	11	70224128	70229798	-1	Bcl6b	B cell CLL/lymphoma 6, member B [Source:MGI Symbol;Acc:MGI:1278332]	0.756392	1.26704	1.31937	0.979328	1.11849	1.17634	1.11427	1.09139	-0.372657	-0.564343	-0.637098	0.371598	0.179912	0.107157	0.429988	0.238302	0.165547
ENSMUSG00000000325	-1.03172	-0.0450508	3.2115	0.763538	1	16	18348182	18407076	1	Arvcf	armadillo repeat gene deleted in velocardiofacial syndrome [Source:MGI Symbol;Acc:MGI:109620]	8.53305	9.21771	8.58837	9.08598	8.83606	9.22974	8.77971	9.0506	-0.0905812	-0.0503409	-0.113229	0.0207659	0.0610062	-0.0018818	-0.0812587	-0.0410185	-0.103906
ENSMUSG00000000326	1.04198	0.0593286	7.33078	0.643594	1	16	18406886	18426852	-1	Comt	catechol-O-methyltransferase [Source:MGI Symbol;Acc:MGI:88470]	171.607	154.801	166.714	156.611	148.144	168.548	164.374	157.768	0.13192	0.212107	0.0259415	-0.0167732	0.0634128	-0.122752	0.0901908	0.170377	-0.0157882
ENSMUSG00000000339	1.00686	0.00986921	5.39623	0.941357	1	3	116488963	116508208	-1	Rtca	RNA 3'-terminal phosphate cyclase [Source:MGI Symbol;Acc:MGI:1913618]	42.6653	43.4911	42.195	44.8314	38.8115	43.8262	42.7838	42.4897	-0.0714493	0.136576	-0.0387319	-0.0437897	0.164236	-0.0110724	-0.0874379	0.120587	-0.0547206
ENSMUSG00000000340	-1.00852	-0.0122406	5.5171	0.926643	1	3	116513070	116549981	1	Dbt	dihydrolipoamide branched chain transacylase E2 [Source:MGI Symbol;Acc:MGI:105386]	47.4163	46.2153	45.5806	45.1307	49.2135	46.0582	46.4041	46.8008	0.0712758	-0.053669	0.0419255	0.0342609	-0.090684	0.00491052	0.0143109	-0.110634	-0.0150394
ENSMUSG00000000346	1.04418	0.0623736	6.96474	0.626795	1	15	100615628	100620731	1	Dazap2	DAZ associated protein 2 [Source:MGI Symbol;Acc:MGI:1344344]	123.387	132.596	133.954	123.368	127.62	122.43	129.979	124.472	0.00021536	-0.0486642	0.0112294	0.104065	0.0551851	0.115079	0.118765	0.0698852	0.129779
ENSMUSG00000000355	1.14778	0.198844	4.4688	0.137343	1	X	38600578	38613426	1	Mcts1	malignant T cell amplified sequence 1 [Source:MGI Symbol;Acc:MGI:1916245]	23.6845	23.3135	22.1306	21.382	23.2366	15.5639	23.0429	20.0608	0.147549	0.0275469	0.605743	0.124771	0.00476887	0.582965	0.0496471	-0.0703553	0.507841
ENSMUSG00000000365	-1.03608	-0.0511356	2.48519	0.746094	1	14	56402697	56525032	1	Rnf17	ring finger protein 17 [Source:MGI Symbol;Acc:MGI:1353419]	4.96382	5.38492	5.42685	5.25028	6.12372	4.94666	5.25853	5.44022	-0.0809434	-0.302957	0.00499744	0.0365288	-0.185485	0.12247	0.0477203	-0.174293	0.133661
ENSMUSG00000000374	1.03129	0.0444443	6.16816	0.731671	1	10	78186725	78244641	-1	Trappc10	trafficking protein particle complex 10 [Source:MGI Symbol;Acc:MGI:1336209]	73.181	73.1399	71.3955	69.7771	69.0666	72.2695	72.5721	70.3711	0.0687148	0.0834792	0.0180815	0.0679042	0.0826687	0.017271	0.0330792	0.0478437	-0.017554
ENSMUSG00000000378	-1.00907	-0.0130314	5.69366	0.920026	1	11	6546887	6596744	1	Ccm2	cerebral cavernous malformation 2 [Source:MGI Symbol;Acc:MGI:2384924]	55.7603	48.8444	50.8083	53.2645	46.6969	56.9168	51.8043	52.2927	0.0660628	0.255912	-0.0296151	-0.124983	0.0648662	-0.220661	-0.0681115	0.121738	-0.163789
ENSMUSG00000000384	-1.02119	-0.0302531	5.11034	0.817387	1	11	6615598	6626067	-1	Tbrg4	transforming growth factor beta regulated gene 4 [Source:MGI Symbol;Acc:MGI:1100868]	37.2287	31.676	31.8143	34.4941	29.6959	38.7287	33.573	34.3062	0.110065	0.326153	-0.0569895	-0.12296	0.0931278	-0.290014	-0.116674	0.0994138	-0.283729
ENSMUSG00000000386	1.09896	0.136145	6.22875	0.28994	1	16	97447035	97462907	-1	Mx1	MX dynamin-like GTPase 1 [Source:MGI Symbol;Acc:MGI:97243]	67.9099	102.092	76.8721	63.9827	88.2208	72.2997	82.2912	74.8344	0.085938	-0.377497	-0.090368	0.674111	0.210676	0.497805	0.264778	-0.198658	0.0884717
ENSMUSG00000000399	-1.04373	-0.0617544	6.1063	0.633553	1	6	126821721	126849136	-1	Ndufa9	NADH dehydrogenase (ubiquinone) 1 alpha subcomplex, 9 [Source:MGI Symbol;Acc:MGI:1913358]	68.619	70.1623	67.7361	74.3201	67.8643	73.3554	68.8391	71.8466	-0.115145	0.0159553	-0.0962947	-0.0830559	0.0480442	-0.0642058	-0.133827	-0.00272742	-0.114977
ENSMUSG00000000409	1.20092	0.264136	0.770497	0.209497	1	4	129548344	129573641	-1	Lck	lymphocyte protein tyrosine kinase [Source:MGI Symbol;Acc:MGI:96756]	2.10372	1.83721	1.44384	1.71382	1.20237	1.56845	1.79492	1.49488	0.295722	0.807053	0.423598	0.100296	0.611628	0.228172	-0.247306	0.264026	-0.11943
ENSMUSG00000000420	-1.00452	-0.0065107	7.11259	0.960388	1	18	24205344	24286818	1	Galnt1	UDP-N-acetyl-alpha-D-galactosamine:polypeptide N-acetylgalactosaminyltransferase 1 [Source:MGI Symbol;Acc:MGI:894693]	135.347	139.913	136.717	133.189	158.853	121.766	137.326	137.936	0.0231922	-0.231032	0.152548	0.0710582	-0.183166	0.200414	0.0377211	-0.216504	0.167077
ENSMUSG00000000439	1.05847	0.0819739	4.18225	0.545742	1	6	115601902	115622624	1	Mkrn2	makorin, ring finger protein, 2 [Source:MGI Symbol;Acc:MGI:1914277]	18.4134	19.1323	19.1434	18.8521	17.6442	17.0418	18.8964	17.846	-0.0339639	0.0615681	0.111676	0.0212881	0.11682	0.166928	0.0221213	0.117653	0.167762
ENSMUSG00000000441	-1.03742	-0.053003	6.4261	0.681008	1	6	115618067	115676635	-1	Raf1	v-raf-leukemia viral oncogene 1 [Source:MGI Symbol;Acc:MGI:97847]	84.8105	82.9277	84.2656	86.2624	82.6842	92.5086	84.0013	87.1518	-0.0244899	0.0366304	-0.125344	-0.0568779	0.00424243	-0.157732	-0.033789	0.0273313	-0.134643
ENSMUSG00000000486	-1.17402	-0.231453	-0.0509686	0.337097	1	7	127214447	127233130	-1	1-Sep	septin 1 [Source:MGI Symbol;Acc:MGI:1858916]	0.94549	0.823576	0.995753	1.30577	0.643131	1.32715	0.921606	1.09202	-0.465766	0.555951	-0.4892	-0.664928	0.356789	-0.688361	-0.391041	0.630676	-0.414475
ENSMUSG00000000530	1.06405	0.0895703	7.34943	0.483643	1	15	101128522	101145336	1	Acvrl1	activin A receptor, type II-like 1 [Source:MGI Symbol;Acc:MGI:1338946]	145.109	176.53	174.331	168.308	150.94	146.801	165.324	155.35	-0.213968	-0.0568365	-0.0167252	0.068809	0.225941	0.266052	0.0507261	0.207858	0.247969
ENSMUSG00000000531	-1.16954	-0.225947	2.85037	0.121187	1	15	101224207	101232755	1	Grasp	GRP1 (general receptor for phosphoinositides 1)-associated scaffold protein [Source:MGI Symbol;Acc:MGI:1860303]	7.20936	5.82838	7.46815	8.4331	8.137	7.48032	6.8353	8.01681	-0.226191	-0.174625	-0.053227	-0.532968	-0.481402	-0.360004	-0.175313	-0.123747	-0.00234876
ENSMUSG00000000532	1.11602	0.158367	4.29461	0.239637	1	15	101174067	101213679	1	Acvr1b	activin A receptor, type 1B [Source:MGI Symbol;Acc:MGI:1338944]	17.4443	20.8428	20.6619	18.3896	19.4337	14.9305	19.6497	17.5846	-0.0761343	-0.155807	0.224496	0.180659	0.100986	0.48129	0.168081	0.0884081	0.468712
ENSMUSG00000000538	1.00051	0.000735473	6.00948	0.997189	1	11	60226714	60352905	-1	Tom1l2	target of myb1-like 2 (chicken) [Source:MGI Symbol;Acc:MGI:2443306]	64.3406	62.1166	66.2923	68.4985	58.3571	65.8147	64.2498	64.2235	-0.0903431	0.140821	-0.0326801	-0.141094	0.0900705	-0.0834309	-0.0472328	0.183932	0.0104302
ENSMUSG00000000552	1.03944	0.0558107	4.65978	0.678706	1	15	103313895	103340086	-1	Zfp385a	zinc finger protein 385A [Source:MGI Symbol;Acc:MGI:1352495]	26.6865	25.1191	25.9394	24.7552	23.3764	26.6939	25.915	24.9418	0.108375	0.191055	-0.000399951	0.0210492	0.103729	-0.0877259	0.0674099	0.15009	-0.0413652
ENSMUSG00000000555	-1.05846	-0.0819677	8.13859	0.520222	1	15	103344286	103366763	-1	Itga5	integrin alpha 5 (fibronectin receptor alpha) [Source:MGI Symbol;Acc:MGI:96604]	280.22	236.968	259.468	276.225	231.751	314.173	258.885	274.05	0.0207156	0.273985	-0.165002	-0.22115	0.0321187	-0.406868	-0.0902845	0.162984	-0.276002
ENSMUSG00000000561	1.01968	0.0281146	6.43922	0.828653	1	3	105959369	105970037	1	Wdr77	WD repeat domain 77 [Source:MGI Symbol;Acc:MGI:1917715]	96.2982	83.2762	83.5686	88.1123	82.0691	87.9239	87.7143	86.0351	0.128166	0.23067	0.131254	-0.0814394	0.0210652	-0.078351	-0.0763829	0.0261218	-0.0732945
ENSMUSG00000000563	1.02008	0.0286773	7.49671	0.822987	1	3	105942698	105960099	-1	Atp5f1	ATP synthase, H+ transporting, mitochondrial F0 complex, subunit B1 [Source:MGI Symbol;Acc:MGI:1100495]	189.736	180.078	181.252	184.331	174.205	181.699	183.689	180.078	0.0416951	0.123214	0.0624431	-0.0336786	0.0478398	-0.0129307	-0.0243042	0.0572142	-0.00355631
ENSMUSG00000000567	-1.0369	-0.0522738	7.23182	0.683543	1	11	112782224	112787760	1	Sox9	SRY (sex determining region Y)-box 9 [Source:MGI Symbol;Acc:MGI:98371]	136.931	153.629	154.964	121.817	189.584	150.541	148.508	153.981	0.168724	-0.46939	-0.136714	0.334725	-0.303389	0.0292865	0.347212	-0.290902	0.0417738
ENSMUSG00000000568	1.0403	0.0570037	6.85747	0.657574	1	5	99955935	99978938	-1	Hnrnpd	heterogeneous nuclear ribonucleoprotein D [Source:MGI Symbol;Acc:MGI:101947]	132.605	113.147	112.122	107.971	132.876	103.186	119.291	114.678	0.296493	-0.00294927	0.361887	0.0675514	-0.231891	0.132945	0.0544243	-0.245018	0.119818
ENSMUSG00000000581	-1.06692	-0.0934471	5.42837	0.475307	1	11	17257579	17269176	1	C1d	C1D nuclear receptor co-repressor [Source:MGI Symbol;Acc:MGI:1927354]	41.507	44.5048	43.0165	39.7444	54.2187	43.6754	43.0094	45.8795	0.0626048	-0.385435	-0.0734648	0.163209	-0.284831	0.0271392	0.11414	-0.3339	-0.0219295
ENSMUSG00000000594	1.00466	0.00670648	4.37244	0.964234	1	11	55098115	55113029	1	Gm2a	GM2 ganglioside activator protein [Source:MGI Symbol;Acc:MGI:95762]	20.5171	20.3993	22.2053	22.4429	19.8811	20.5105	21.0406	20.9449	-0.129431	0.0454303	0.000464219	-0.137739	0.0371227	-0.00784335	-0.0153574	0.159504	0.114538
ENSMUSG00000000600	1.05433	0.0763326	5.96179	0.555548	1	5	3803184	3845564	1	Krit1	KRIT1, ankyrin repeat containing [Source:MGI Symbol;Acc:MGI:1930618]	65.5698	64.8724	61.1392	57.8619	72.8695	50.9446	63.8605	60.5587	0.180416	-0.152285	0.364102	0.164991	-0.16771	0.348677	0.0794836	-0.253217	0.26317
ENSMUSG00000000605	1.07922	0.10999	6.13917	0.394842	1	7	7282309	7300851	-1	Clcn4	chloride channel, voltage-sensitive 4 [Source:MGI Symbol;Acc:MGI:104571]	68.3353	70.5424	77.9675	67.1112	74.743	59.0583	72.2817	66.9708	0.026079	-0.129306	0.210492	0.0719387	-0.0834467	0.256351	0.21632	0.0609341	0.400732
ENSMUSG00000000628	-1.00825	-0.0118486	7.13093	0.926286	1	6	82725025	82774454	-1	Hk2	hexokinase 2 [Source:MGI Symbol;Acc:MGI:1315197]	162.506	139.089	140.401	146.573	147.249	151.868	147.332	148.563	0.148878	0.142237	0.0976719	-0.0756054	-0.0822464	-0.126812	-0.0620617	-0.0687026	-0.113268
ENSMUSG00000000631	1.0025	0.00360618	5.36378	0.980106	1	11	77763246	77865980	1	Myo18a	myosin XVIIIA [Source:MGI Symbol;Acc:MGI:2667185]	40.4197	41.3372	42.8921	41.4854	40.2376	42.6197	41.5496	41.4476	-0.0375448	0.00651453	-0.0764612	-0.00516455	0.0388948	-0.044081	0.0481065	0.0921658	0.00919009
ENSMUSG00000000686	-1.11547	-0.157647	0.617645	0.470401	1	11	77515121	77538607	1	Abhd15	abhydrolase domain containing 15 [Source:MGI Symbol;Acc:MGI:1914727]	1.25277	1.39374	1.71767	1.98586	1.482	1.38748	1.45473	1.61844	-0.664636	-0.242415	-0.147338	-0.510798	-0.0885773	0.00650037	-0.209307	0.212914	0.307991
ENSMUSG00000000693	1.08764	0.121199	8.1172	0.341785	1	6	83034173	83052562	1	Loxl3	lysyl oxidase-like 3 [Source:MGI Symbol;Acc:MGI:1337004]	233.867	311.533	295.714	268.771	266.312	238.164	280.371	257.749	-0.200689	-0.187429	-0.0262642	0.213009	0.226269	0.387434	0.137823	0.151084	0.312248
ENSMUSG00000000708	1.17858	0.237052	6.41846	0.0655659	1	17	53566861	53672720	1	Kat2b	K(lysine) acetyltransferase 2B [Source:MGI Symbol;Acc:MGI:1343094]	94.3363	98.3539	97.534	77.5573	95.5189	73.1442	96.7414	82.0735	0.28255	-0.0179729	0.367069	0.34272	0.0421969	0.427239	0.330642	0.0301192	0.415162
ENSMUSG00000000711	1.01657	0.0237084	6.83505	0.853616	1	10	128677175	128696264	-1	Rab5b	RAB5B, member RAS oncogene family [Source:MGI Symbol;Acc:MGI:105938]	106.226	118.5	116.652	113.33	113.862	108.585	113.793	111.926	-0.0933946	-0.100153	-0.0316929	0.064356	0.057598	0.126058	0.0416872	0.0349291	0.103389
ENSMUSG00000000730	-1.11246	-0.153757	2.12871	0.349767	1	10	78041947	78063622	1	Dnmt3l	DNA (cytosine-5-)-methyltransferase 3-like [Source:MGI Symbol;Acc:MGI:1859287]	3.85287	4.14955	4.18216	5.27749	3.41139	4.85617	4.06153	4.51502	-0.453917	0.175576	-0.333885	-0.346895	0.282597	-0.226863	-0.335602	0.29389	-0.215571
ENSMUSG00000000732	-1.06865	-0.0957872	0.754676	0.674369	1	10	78069302	78083913	1	Icosl	icos ligand [Source:MGI Symbol;Acc:MGI:1354701]	1.44187	1.74218	1.36916	1.4962	1.64977	1.6891	1.51774	1.61169	-0.0533543	-0.194321	-0.228314	0.219595	0.0786282	0.0446355	-0.128007	-0.268974	-0.302966
ENSMUSG00000000738	-1.05019	-0.0706481	5.602	0.588336	1	8	123062942	123097760	1	Spg7	SPG7, paraplegin matrix AAA peptidase subunit [Source:MGI Symbol;Acc:MGI:2385906]	45.9981	48.1792	48.8666	50.6258	47.5637	52.0304	47.6813	50.0733	-0.138298	-0.0482866	-0.177781	-0.071463	0.0185486	-0.110946	-0.0510248	0.0389868	-0.0905073
ENSMUSG00000000740	-1.03599	-0.051014	8.335	0.68919	1	8	123102350	123105244	1	Rpl13	ribosomal protein L13 [Source:MGI Symbol;Acc:MGI:105922]	321.443	337.381	318.765	362.27	308.619	341.862	325.863	337.584	-0.1725	0.0587373	-0.0888526	-0.102685	0.128552	-0.0190375	-0.184569	0.0466689	-0.100921
ENSMUSG00000000743	-1.02397	-0.0341793	6.34148	0.791931	1	8	123204264	123212763	-1	Chmp1a	charged multivesicular body protein 1A [Source:MGI Symbol;Acc:MGI:1920159]	76.8447	80.8054	80.88	86.7521	73.9041	83.5805	79.5101	81.4122	-0.174952	0.0562919	-0.121219	-0.102446	0.128798	-0.0487131	-0.101115	0.130129	-0.0473821
ENSMUSG00000000751	1.00904	0.0129865	7.51096	0.919565	1	11	75298166	75348324	-1	Rpa1	replication protein A1 [Source:MGI Symbol;Acc:MGI:1915525]	193.376	183.721	181.849	196.654	170.346	186.948	186.316	184.649	-0.0242508	0.182946	0.0487784	-0.0981483	0.109049	-0.0251192	-0.112919	0.0942781	-0.0398896
ENSMUSG00000000753	1.09151	0.12632	5.56916	0.329005	1	11	75409769	75422701	-1	Serpinf1	serine (or cysteine) peptidase inhibitor, clade F, member 1 [Source:MGI Symbol;Acc:MGI:108080]	39.0724	64.0489	53.2728	52.0948	48.0111	43.0118	52.1313	47.7059	-0.41499	-0.297219	-0.138583	0.298033	0.415805	0.57444	0.0322594	0.15003	0.308666
ENSMUSG00000000759	-1.00714	-0.0102668	5.58692	0.938192	1	8	12614277	12672248	-1	Tubgcp3	tubulin, gamma complex associated protein 3 [Source:MGI Symbol;Acc:MGI:2183752]	49.4492	47.0705	45.3317	46.11	46.613	50.1603	47.2838	47.6278	0.100866	0.0852135	-0.0206014	0.0297437	0.0140916	-0.0917233	-0.0245613	-0.0402135	-0.146028
ENSMUSG00000000776	-1.03815	-0.0540177	5.53699	0.678266	1	14	70438748	70443471	-1	Polr3d	polymerase (RNA) III (DNA directed) polypeptide D [Source:MGI Symbol;Acc:MGI:1914315]	48.7637	43.9029	45.5557	46.5725	46.0258	50.9446	46.0741	47.8476	0.0663292	0.0833643	-0.0631216	-0.0851606	-0.0681255	-0.214611	-0.031846	-0.014811	-0.161297
ENSMUSG00000000787	-1.02837	-0.0403657	8.90768	0.751308	1	X	13280970	13294052	1	Ddx3x	DEAD/H (Asp-Glu-Ala-Asp/His) box polypeptide 3, X-linked [Source:MGI Symbol;Acc:MGI:103064]	485.226	460.727	473.456	453.891	609.716	396.065	473.136	486.557	0.0963095	-0.329481	0.29292	0.0215665	-0.404224	0.218177	0.0608827	-0.364908	0.257493
ENSMUSG00000000804	-1.02555	-0.0363957	6.78227	0.777352	1	11	84984442	85140161	-1	Usp32	ubiquitin specific peptidase 32 [Source:MGI Symbol;Acc:MGI:2144475]	109.511	103.137	106.172	106.203	120.601	100.17	106.274	108.991	0.0442617	-0.13916	0.128633	-0.0422575	-0.225679	0.0421137	-0.000414275	-0.183836	0.0839569
ENSMUSG00000000811	-1.10798	-0.147936	2.91677	0.311254	1	6	89643988	89675529	1	Txnrd3	thioredoxin reductase 3 [Source:MGI Symbol;Acc:MGI:2386711]	7.37483	5.95509	7.46815	7.94344	7.21425	7.96292	6.93269	7.70687	-0.107154	0.0317598	-0.110688	-0.415641	-0.276727	-0.419175	-0.0890128	0.0499012	-0.0925466
ENSMUSG00000000823	-1.03183	-0.0452064	5.4531	0.730199	1	2	181582103	181592803	-1	Zfp512b	zinc finger protein 512B [Source:MGI Symbol;Acc:MGI:2685478]	41.507	44.4731	42.8672	40.6149	40.7969	51.5478	42.9491	44.3199	0.0313468	0.0248978	-0.312556	0.130924	0.124475	-0.212979	0.077864	0.071415	-0.266038
ENSMUSG00000000826	1.04092	0.0578564	7.50736	0.651168	1	2	181520485	181555133	1	Dnajc5	DnaJ heat shock protein family (Hsp40) member C5 [Source:MGI Symbol;Acc:MGI:892995]	189.453	182.042	183.243	180.06	179.713	173.163	184.913	177.646	0.0733574	0.0761418	0.129704	0.0157907	0.0185752	0.0721377	0.0252815	0.028066	0.0816286
ENSMUSG00000000827	-1.00246	-0.00354226	6.22356	0.97926	1	2	181497142	181517966	1	Tpd52l2	tumor protein D52-like 2 [Source:MGI Symbol;Acc:MGI:1913564]	75.261	79.8868	76.4738	74.4017	75.1065	82.6756	77.2072	77.3946	0.0165676	0.00296583	-0.135558	0.102622	0.0890205	-0.0495033	0.0396304	0.0260286	-0.112495
ENSMUSG00000000838	-1.00821	-0.0117953	7.63888	0.927095	1	X	68678541	68717963	1	Fmr1	fragile X mental retardation syndrome 1 [Source:MGI Symbol;Acc:MGI:95564]	197.56	188.06	180.231	160.474	264.522	145.474	188.617	190.157	0.299955	-0.421098	0.441531	0.228859	-0.492194	0.370434	0.167512	-0.553541	0.309088
ENSMUSG00000000876	1.07687	0.106844	2.67031	0.472454	1	2	154585758	154603708	-1	Pxmp4	peroxisomal membrane protein 4 [Source:MGI Symbol;Acc:MGI:1891701]	5.57839	6.84201	7.61751	6.66487	6.26353	5.6404	6.67931	6.1896	-0.256727	-0.167127	-0.0159475	0.0378444	0.127444	0.278624	0.192743	0.282343	0.433522
ENSMUSG00000000881	1.05097	0.071718	5.69701	0.581796	1	X	100767722	100818410	1	Dlg3	discs, large homolog 3 (Drosophila) [Source:MGI Symbol;Acc:MGI:1888986]	51.5529	54.2293	53.0487	46.8445	54.0509	50.2207	52.9436	50.372	0.138173	-0.0682671	0.0377715	0.211192	0.00475264	0.110791	0.179438	-0.0270013	0.0790373
ENSMUSG00000000884	1.08125	0.112701	1.47633	0.545915	1	16	18498768	18566679	1	Gnb1l	guanine nucleotide binding protein (G protein), beta polypeptide 1-like [Source:MGI Symbol;Acc:MGI:1338057]	3.35649	2.66078	2.63875	3.18282	1.90143	2.95593	2.88534	2.68006	0.0766505	0.819869	0.183341	-0.258452	0.484766	-0.151762	-0.270451	0.472767	-0.163761
ENSMUSG00000000901	1.0802	0.111302	3.99889	0.419464	1	10	75923222	75936496	-1	Mmp11	matrix metallopeptidase 11 [Source:MGI Symbol;Acc:MGI:97008]	14.0878	15.9647	16.8282	13.629	13.338	16.4386	15.6269	14.4685	0.0477698	0.0789079	-0.22264	0.228208	0.259346	-0.0422018	0.304206	0.335344	0.0337959
ENSMUSG00000000902	-1.00597	-0.00858895	5.76031	0.948229	1	10	75896769	75921617	-1	Smarcb1	SWI/SNF related, matrix associated, actin dependent regulator of chromatin, subfamily b, member 1 [Source:MGI Symbol;Acc:MGI:1328366]	52.4274	53.8492	56.3347	56.1753	47.34	60.0838	54.2038	54.5331	-0.0996143	0.147262	-0.196654	-0.0610122	0.185864	-0.158052	0.00408784	0.250964	-0.0929522
ENSMUSG00000000916	1.00704	0.0101216	2.99878	0.953896	1	5	135369953	135376805	1	Nsun5	NOL1/NOP2/Sun domain family, member 5 [Source:MGI Symbol;Acc:MGI:2140844]	8.27304	7.919	7.54283	8.29708	6.57112	8.71698	7.91162	7.86173	-0.00418622	0.332279	-0.0754106	-0.0672863	0.269179	-0.138511	-0.137498	0.198967	-0.208723
ENSMUSG00000000934	-1.02255	-0.0321684	3.33553	0.828151	1	15	75657035	75678800	-1	Top1mt	DNA topoisomerase 1, mitochondrial [Source:MGI Symbol;Acc:MGI:1920210]	10.0931	10.073	9.60902	11.2079	9.00383	10.2251	9.92503	10.1456	-0.15114	0.16476	-0.0187453	-0.154023	0.161878	-0.0216278	-0.22205	0.0938499	-0.0896556
ENSMUSG00000000948	-1.06214	-0.0869743	3.97826	0.529529	1	7	59974149	60005064	-1	Gm38393	predicted gene, 38393 [Source:MGI Symbol;Acc:MGI:5613898]	14.1587	17.1684	16.5046	16.2677	17.9238	16.5592	15.9439	16.9169	-0.200321	-0.340184	-0.225946	0.0777423	-0.0621199	0.0521174	0.0208564	-0.119006	-0.00476842
ENSMUSG00000000957	1.03492	0.0495231	8.69726	0.697399	1	14	54431612	54441265	1	Mmp14	matrix metallopeptidase 14 (membrane-inserted) [Source:MGI Symbol;Acc:MGI:101900]	389.282	431.522	446.794	419.996	398.154	406.652	422.533	408.267	-0.109558	-0.0325101	-0.0629777	0.03906	0.116108	0.0856406	0.0892368	0.166285	0.135817
ENSMUSG00000000958	1.10232	0.140545	2.23943	0.378443	1	14	54369442	54417780	-1	Slc7a7	solute carrier family 7 (cationic amino acid transporter, y+ system), member 7 [Source:MGI Symbol;Acc:MGI:1337120]	4.65654	4.65637	4.80451	4.67901	3.57916	4.55455	4.70581	4.27091	-0.00694483	0.379637	0.031951	-0.00699753	0.379584	0.0318983	0.0381853	0.424767	0.0770812
ENSMUSG00000000959	1.02929	0.0416556	5.14745	0.753532	1	14	54360841	54369673	1	Oxa1l	oxidase assembly 1-like [Source:MGI Symbol;Acc:MGI:1916339]	36.9214	35.6355	35.0505	36.3439	31.2058	37.0095	35.8691	34.8531	0.0227426	0.242642	-0.00343687	-0.0284001	0.1915	-0.0545795	-0.0522796	0.16762	-0.0784591
ENSMUSG00000000976	1.00498	0.00716719	5.52931	0.95806	1	11	83753696	83783754	1	Heatr6	HEAT repeat containing 6 [Source:MGI Symbol;Acc:MGI:1919790]	46.1399	45.8985	45.481	46.5725	43.0059	47.2647	45.8398	45.6144	-0.0134615	0.101482	-0.0347482	-0.0210302	0.0939137	-0.0423169	-0.034213	0.0807309	-0.0554997
ENSMUSG00000001016	-1.00538	-0.00774643	6.28488	0.95227	1	3	90476126	90488379	1	Ilf2	interleukin enhancer binding factor 2 [Source:MGI Symbol;Acc:MGI:1915031]	82.4704	74.692	74.7313	73.6944	75.6098	83.8821	77.2979	77.7288	0.162321	0.125303	-0.0244862	0.0193982	-0.0176199	-0.167409	0.0201566	-0.0168614	-0.166651
ENSMUSG00000001017	1.03094	0.0439537	6.47397	0.732587	1	3	90498956	90509498	-1	Chtop	chromatin target of PRMT1 [Source:MGI Symbol;Acc:MGI:1913761]	89.2779	94.4895	87.9997	86.0992	103.32	74.1396	90.589	87.8531	0.0523034	-0.210749	0.26806	0.134153	-0.128899	0.34991	0.0314978	-0.231554	0.247254
ENSMUSG00000001018	1.10893	0.149172	5.38345	0.253165	1	3	90488026	90491033	-1	Snapin	SNAP-associated protein [Source:MGI Symbol;Acc:MGI:1333745]	40.8925	45.455	44.5599	41.159	43.2016	33.6313	43.6358	39.3306	-0.00937185	-0.07925	0.282032	0.143234	0.0733555	0.434638	0.114541	0.0446625	0.405945
ENSMUSG00000001025	-1.04804	-0.0676916	10.2956	0.594256	1	3	90612882	90624181	1	S100a6	S100 calcium binding protein A6 (calcyclin) [Source:MGI Symbol;Acc:MGI:1339467]	1227.58	1188.93	1270.08	1368.07	977.587	1518.08	1228.86	1287.91	-0.156324	0.328518	-0.306435	-0.202479	0.282363	-0.35259	-0.107216	0.377626	-0.257327
ENSMUSG00000001029	-1.27185	-0.346929	0.262072	0.109182	1	11	106377656	106388075	-1	Icam2	intercellular adhesion molecule 2 [Source:MGI Symbol;Acc:MGI:96394]	1.25277	1.4571	0.970859	1.4962	1.17441	1.99073	1.22691	1.55378	-0.256171	0.0931878	-0.66817	-0.0382029	0.311156	-0.450201	-0.623964	-0.274605	-1.03596
ENSMUSG00000001034	1.09327	0.12865	4.5652	0.335903	1	11	61488812	61494406	-1	Mapk7	mitogen-activated protein kinase 7 [Source:MGI Symbol;Acc:MGI:1346347]	24.2991	25.4041	24.2964	23.5855	20.4124	23.6776	24.6665	22.5585	0.0430045	0.251457	0.0373796	0.107165	0.315617	0.10154	0.0428422	0.251294	0.0372173
ENSMUSG00000001036	1.07345	0.10226	5.45462	0.432918	1	11	61517249	61579687	-1	Epn2	epsin 2 [Source:MGI Symbol;Acc:MGI:1333766]	41.9325	49.0661	48.5927	41.5126	45.7182	42.7705	46.5305	43.3338	0.0145192	-0.1247	-0.0285476	0.241177	0.101958	0.19811	0.227191	0.0879721	0.184124
ENSMUSG00000001039	-1.04928	-0.0693952	3.02221	0.642218	1	11	61505144	61512931	1	B9d1	B9 protein domain 1 [Source:MGI Symbol;Acc:MGI:1351471]	7.98939	8.17241	7.46815	9.11319	6.655	9.01861	7.87665	8.26227	-0.18987	0.263646	-0.174818	-0.157195	0.296321	-0.142144	-0.287206	0.166311	-0.272154
ENSMUSG00000001052	1.02689	0.038286	7.13492	0.76579	1	3	129982759	130061553	-1	Sec24b	Sec24 related gene family, member B (S. cerevisiae) [Source:MGI Symbol;Acc:MGI:2139764]	149.269	138.741	145.305	139.527	134.107	148.37	144.438	140.668	0.0973733	0.154536	0.0087216	-0.00815182	0.0490108	-0.0968035	0.0585425	0.115705	-0.0301091
ENSMUSG00000001054	1.09402	0.129638	4.15381	0.341107	1	11	51623671	51635896	-1	Rmnd5b	required for meiotic nuclear division 5 homolog B [Source:MGI Symbol;Acc:MGI:1913339]	17.7752	18.4671	18.5957	17.8727	14.037	18.2182	18.2793	16.7093	-0.0078926	0.34063	-0.035512	0.0471974	0.39572	0.019578	0.0572079	0.405731	0.0295885
ENSMUSG00000001056	-1.17336	-0.230651	4.84153	0.0808179	1	11	51619735	51623714	1	Nhp2	NHP2 ribonucleoprotein [Source:MGI Symbol;Acc:MGI:1098547]	29.2629	25.9426	25.8647	33.2427	28.7451	33.1788	27.0234	31.7222	-0.183965	0.0257558	-0.181188	-0.357714	-0.147993	-0.354937	-0.362056	-0.152335	-0.359279
ENSMUSG00000001062	1.0223	0.0318191	3.73989	0.821824	1	8	123242356	123254348	-1	Vps9d1	VPS9 domain containing 1 [Source:MGI Symbol;Acc:MGI:1914143]	12.8114	13.589	12.8452	13.0577	12.1636	13.1509	13.0819	12.7907	-0.0274734	0.0748622	-0.0377314	0.0575381	0.159874	0.0472802	-0.0236703	0.0786654	-0.0339282
ENSMUSG00000001065	-1.05609	-0.0787353	4.12883	0.562145	1	8	123254195	123269745	1	Zfp276	zinc finger protein (C2H2 type) 276 [Source:MGI Symbol;Acc:MGI:1888495]	17.137	16.7883	16.3303	16.2133	15.547	21.3551	16.7519	17.7051	0.0799368	0.140481	-0.317464	0.0502749	0.110819	-0.347126	0.0103765	0.0709207	-0.387025
ENSMUSG00000001082	1.00381	0.00548109	4.72606	0.970036	1	5	34633642	34637212	-1	Mfsd10	major facilitator superfamily domain containing 10 [Source:MGI Symbol;Acc:MGI:1915544]	26.1192	27.4631	26.6613	27.7204	22.5096	29.7101	26.7478	26.6467	-0.0858396	0.21457	-0.185845	-0.0134553	0.286955	-0.113461	-0.0562025	0.244208	-0.156208
ENSMUSG00000001089	1.00438	0.00630427	8.06532	0.960806	1	4	136469761	136554780	1	Luzp1	leucine zipper protein 1 [Source:MGI Symbol;Acc:MGI:107629]	261.499	269.658	270.87	254.326	290.583	253.607	267.342	266.172	0.0401268	-0.152146	0.044212	0.0844505	-0.107822	0.0885357	0.0909202	-0.101352	0.0950054
ENSMUSG00000001098	1.06521	0.0911437	8.37587	0.474541	1	5	114363567	114380508	-1	Kctd10	potassium channel tetramerisation domain containing 10 [Source:MGI Symbol;Acc:MGI:2141207]	331.465	341.911	343.41	332.536	320.083	301.897	338.929	318.172	-0.00465332	0.0504103	0.134801	0.040108	0.0951716	0.179562	0.046422	0.101486	0.185876
ENSMUSG00000001100	1.05981	0.0837994	5.82593	0.518756	1	11	78512193	78522736	1	Poldip2	polymerase (DNA-directed), delta interacting protein 2 [Source:MGI Symbol;Acc:MGI:1915061]	58.3368	59.9626	58.5503	57.9708	52.0936	56.7961	58.9499	55.6202	0.00907991	0.1633	0.0386133	0.0487387	0.202958	0.0782721	0.0143505	0.16857	0.0438839
ENSMUSG00000001105	-1.01668	-0.0238622	4.76398	0.858135	1	11	78536361	78541737	1	Ift20	intraflagellar transport 20 [Source:MGI Symbol;Acc:MGI:1915585]	26.5683	26.196	28.5532	25.8162	27.5707	29.318	27.1058	27.5683	0.0414301	-0.0534327	-0.142082	0.0210741	-0.0737887	-0.162438	0.145378	0.0505156	-0.038134
ENSMUSG00000001119	-1.02904	-0.0412964	7.95327	0.746947	1	10	76708792	76726168	-1	Col6a1	collagen, type VI, alpha 1 [Source:MGI Symbol;Acc:MGI:88459]	201.46	268.422	277.591	279.788	259.098	230.201	249.158	256.362	-0.47384	-0.363001	-0.192396	-0.0598319	0.051008	0.221613	-0.0113757	0.0994642	0.270069
ENSMUSG00000001120	-1.15837	-0.212091	2.07274	0.192047	1	10	76761857	76961887	-1	Pcbp3	poly(rC) binding protein 3 [Source:MGI Symbol;Acc:MGI:1890470]	4.27834	3.80112	3.41045	4.73342	3.83082	4.76568	3.82997	4.44331	-0.14583	0.159399	-0.155631	-0.316458	-0.0112299	-0.326259	-0.472918	-0.16769	-0.48272
ENSMUSG00000001123	-1.03528	-0.0500186	8.59415	0.694661	1	11	78962974	78984946	-1	Lgals9	lectin, galactose binding, soluble 9 [Source:MGI Symbol;Acc:MGI:109496]	383.538	398.896	385.481	407.808	370.583	430.721	389.305	403.038	-0.0885211	0.0495732	-0.167385	-0.0318797	0.106215	-0.110743	-0.0812322	0.0568621	-0.160096
ENSMUSG00000001127	1.02219	0.031666	6.23662	0.80653	1	X	20797814	20860519	1	Araf	Araf proto-oncogene, serine/threonine kinase [Source:MGI Symbol;Acc:MGI:88065]	73.6537	80.6154	75.4781	76.3876	70.4648	77.8797	76.5824	74.9107	-0.0525796	0.0638563	-0.0804898	0.0777176	0.194153	0.0498074	-0.0172801	0.0991557	-0.0451904
ENSMUSG00000001128	-1.04294	-0.0606501	1.08711	0.740581	1	X	20925454	20931555	-1	Cfp	complement factor properdin [Source:MGI Symbol;Acc:MGI:97545]	2.31645	2.21732	1.84214	2.09467	1.56588	3.01626	2.1253	2.2256	0.145191	0.56494	-0.380842	0.0820914	0.50184	-0.443942	-0.18534	0.234408	-0.711374
ENSMUSG00000001131	1.04104	0.0580215	9.45712	0.648105	1	X	20870166	20874735	1	Timp1	tissue inhibitor of metalloproteinase 1 [Source:MGI Symbol;Acc:MGI:98752]	598.188	826.332	797.598	777.124	669.807	687.495	740.706	711.475	-0.377545	-0.163145	-0.20075	0.0885764	0.302976	0.265371	0.0375176	0.251917	0.214312
ENSMUSG00000001134	1.02807	0.0399342	2.9944	0.791317	1	X	20941722	20962017	-1	Uxt	ubiquitously expressed transcript [Source:MGI Symbol;Acc:MGI:1277988]	7.77666	8.26743	8.09049	8.18827	7.1024	8.17405	8.04486	7.82157	-0.0744078	0.130844	-0.0719013	0.0138812	0.219133	0.0163877	-0.0173307	0.187921	-0.0148243
ENSMUSG00000001138	1.0811	0.112496	3.78617	0.414107	1	1	36511867	36528237	1	Cnnm3	cyclin M3 [Source:MGI Symbol;Acc:MGI:2151055]	13.1423	15.2362	14.2891	13.5474	13.1143	12.7588	14.2225	13.1401	-0.0437928	0.00308176	0.0427311	0.169486	0.216361	0.25601	0.076898	0.123773	0.163422
ENSMUSG00000001143	1.09525	0.131254	4.60229	0.327274	1	1	36419871	36445271	-1	Lman2l	lectin, mannose-binding 2-like [Source:MGI Symbol;Acc:MGI:2443010]	24.9373	23.9787	25.9145	22.5245	22.1461	23.6776	24.9435	22.7827	0.146808	0.171255	0.0747824	0.0902574	0.114704	0.0182313	0.20226	0.226707	0.130234
ENSMUSG00000001150	-1.011	-0.0157773	6.36569	0.903285	1	10	76468927	76515857	1	Mcm3ap	minichromosome maintenance complex component 3 associated protein [Source:MGI Symbol;Acc:MGI:1930089]	82.3759	81.5023	83.8922	84.6846	81.4539	84.3647	82.5901	83.5011	-0.0398788	0.0162378	-0.0344177	-0.0552592	0.000857332	-0.0497981	-0.0135639	0.0425526	-0.00810281
ENSMUSG00000001151	1.01162	0.0166687	5.44606	0.900589	1	10	76351263	76442786	-1	Pcnt	pericentrin (kendrin) [Source:MGI Symbol;Acc:MGI:102722]	45.289	44.0613	42.8174	41.9207	42.8661	45.8773	44.0559	43.5547	0.111499	0.0793247	-0.0186187	0.0718504	0.0396763	-0.058267	0.0305347	-0.0016394	-0.0995827
ENSMUSG00000001156	1.00802	0.0115254	3.87158	0.935448	1	6	86647042	86669161	-1	Mxd1	MAX dimerization protein 1 [Source:MGI Symbol;Acc:MGI:96908]	14.5842	15.4579	16.1312	15.8325	16.1342	13.8145	15.3911	15.2604	-0.118481	-0.145716	0.0782268	-0.0345431	-0.0617786	0.162164	0.0269677	-0.000267778	0.223675
ENSMUSG00000001157	1.0704	0.0981538	4.73966	0.460201	1	6	86691768	86733383	-1	Gmcl1	germ cell-less, spermatogenesis associated 1 [Source:MGI Symbol;Acc:MGI:1345156]	25.5519	27.8432	27.6321	22.987	29.6959	22.9839	27.0091	25.2222	0.152611	-0.216832	0.152808	0.276507	-0.0929371	0.276703	0.265529	-0.103914	0.265726
ENSMUSG00000001158	-1.04591	-0.0647598	5.38412	0.621241	1	6	86675151	86684522	-1	Snrnp27	small nuclear ribonucleoprotein 27 (U4/U6.U5) [Source:MGI Symbol;Acc:MGI:1913868]	41.9325	42.7626	39.4816	39.3635	43.7049	46.8123	41.3922	43.2936	0.0912092	-0.059727	-0.158819	0.119489	-0.0314468	-0.130538	0.00432089	-0.146615	-0.245707
ENSMUSG00000001166	-1.04221	-0.0596523	4.00618	0.667702	1	5	120800194	120812514	-1	Oas1c	2'-5' oligoadenylate synthetase 1C [Source:MGI Symbol;Acc:MGI:2149633]	16.0261	17.6435	14.9612	17.0838	15.8546	17.7054	16.2103	16.8813	-0.0922112	0.0155213	-0.143771	0.0465077	0.15424	-0.00505247	-0.191407	-0.083674	-0.242967
ENSMUSG00000001173	1.00511	0.0073564	5.87775	0.955556	1	X	47912387	47965868	1	Ocrl	OCRL, inositol polyphosphate-5-phosphatase [Source:MGI Symbol;Acc:MGI:109589]	57.8877	58.5372	55.2643	58.2428	58.8604	53.6894	57.2297	56.9309	-0.00882392	-0.0240427	0.108619	0.00727485	-0.0079439	0.124718	-0.0757321	-0.0909508	0.0417113
ENSMUSG00000001175	-1.01811	-0.0258895	8.67249	0.839052	1	12	100199435	100209814	1	Calm1	calmodulin 1 [Source:MGI Symbol;Acc:MGI:88251]	419.325	397.344	398.152	423.178	425.389	388.252	404.94	412.273	-0.013197	-0.0207139	0.111074	-0.0908788	-0.0983956	0.0333919	-0.0879473	-0.0954642	0.0363234
ENSMUSG00000001211	1.01414	0.0202552	6.63343	0.875437	1	10	78269178	78352489	-1	Agpat3	1-acylglycerol-3-phosphate O-acyltransferase 3 [Source:MGI Symbol;Acc:MGI:1336186]	96.8891	101.648	104.853	104.815	91.5762	102.764	101.13	99.7184	-0.113442	0.0813619	-0.084926	-0.0442635	0.15054	-0.0157475	0.000516287	0.19532	0.0290323
ENSMUSG00000001227	1.14102	0.190325	0.256418	0.39229	1	17	56123085	56140343	-1	Sema6b	sema domain, transmembrane domain (TM), and cytoplasmic domain, (semaphorin) 6B [Source:MGI Symbol;Acc:MGI:1202889]	1.13459	1.42542	1.29448	1.06094	1.0346	1.26683	1.28483	1.12079	0.0968284	0.133094	-0.159051	0.426046	0.462311	0.170166	0.287031	0.323296	0.0311512
ENSMUSG00000001228	-1.0554	-0.0777921	6.33519	0.545466	1	17	56303321	56323486	1	Uhrf1	ubiquitin-like, containing PHD and RING finger domains, 1 [Source:MGI Symbol;Acc:MGI:1338889]	92.8235	73.6467	73.7853	91.0775	71.052	91.5132	80.0852	84.5476	0.0273962	0.385616	0.0205104	-0.306474	0.0517459	-0.31336	-0.303761	0.0544588	-0.310647
ENSMUSG00000001229	1.01838	0.0262727	6.49453	0.839503	1	17	56186682	56218889	-1	Dpp9	dipeptidylpeptidase 9 [Source:MGI Symbol;Acc:MGI:2443967]	92.8708	88.9779	91.9329	93.0089	78.406	97.4552	91.2605	89.6234	-0.00214415	0.244261	-0.0695147	-0.0639229	0.182482	-0.131293	-0.0167881	0.229617	-0.0841586
ENSMUSG00000001240	-1.05017	-0.0706264	2.55064	0.643451	1	11	101246028	101259546	1	Ramp2	receptor (calcitonin) activity modifying protein 2 [Source:MGI Symbol;Acc:MGI:1859650]	5.27111	5.95509	7.91624	8.73234	3.5512	7.84227	6.38081	6.7086	-0.728261	0.5698	-0.573164	-0.552246	0.745816	-0.397148	-0.141553	1.15651	0.013544
ENSMUSG00000001248	-1.0349	-0.049494	4.82465	0.709657	1	7	31130127	31155896	-1	Gramd1a	GRAM domain containing 1A [Source:MGI Symbol;Acc:MGI:105490]	26.9701	25.911	27.4828	28.4005	24.9982	29.8006	26.788	27.7331	-0.0745548	0.109537	-0.14398	-0.132354	0.0517376	-0.201779	-0.0473885	0.136703	-0.116814
ENSMUSG00000001270	-1.12865	-0.174603	6.63479	0.173976	1	12	111669361	111672338	-1	Ckb	creatine kinase, brain [Source:MGI Symbol;Acc:MGI:88407]	96.1327	90.2766	107.865	129.543	84.9771	117.664	98.0914	110.728	-0.430335	0.177953	-0.291575	-0.521011	0.0872768	-0.382251	-0.264208	0.344079	-0.125449
ENSMUSG00000001280	1.05991	0.0839472	6.85579	0.513113	1	15	102406143	102436404	1	Sp1	trans-acting transcription factor 1 [Source:MGI Symbol;Acc:MGI:98372]	118.706	118.246	122.951	107.78	134.638	97.1234	119.968	113.181	0.139301	-0.181689	0.289505	0.133702	-0.187289	0.283906	0.189983	-0.131007	0.340187
ENSMUSG00000001285	-1.03599	-0.0510086	4.46147	0.702589	1	15	102331709	102338139	1	Myg1	melanocyte proliferating gene 1 [Source:MGI Symbol;Acc:MGI:1929864]	22.7627	20.8111	21.5581	22.5517	18.6788	26.3018	21.7106	22.5107	0.0134318	0.285272	-0.208488	-0.115884	0.155957	-0.337804	-0.065012	0.206829	-0.286932
ENSMUSG00000001288	-1.0082	-0.011776	5.68163	0.929846	1	15	102234938	102257517	-1	Rarg	retinoic acid receptor, gamma [Source:MGI Symbol;Acc:MGI:97858]	47.8655	54.0709	55.9364	52.8021	52.6528	53.6894	52.6243	53.0481	-0.14161	-0.137526	-0.165651	0.0342578	0.0383416	0.0102165	0.083193	0.0872769	0.0591517
ENSMUSG00000001289	-1.08213	-0.113872	6.25765	0.37789	1	15	102326116	102331873	1	Pfdn5	prefoldin 5 [Source:MGI Symbol;Acc:MGI:1928753]	70.1318	78.3981	76.7228	83.2429	71.3316	89.1605	75.0842	81.245	-0.247259	-0.0244732	-0.346337	-0.0865082	0.136277	-0.185587	-0.117672	0.105114	-0.216751
ENSMUSG00000001305	-1.03984	-0.0563583	4.88278	0.669361	1	1	186720978	186749358	-1	Rrp15	ribosomal RNA processing 15 homolog (S. cerevisiae) [Source:MGI Symbol;Acc:MGI:1914473]	34.3449	28.3183	25.9892	30.1415	30.0594	32.0326	29.5508	30.7445	0.188345	0.192283	0.100555	-0.0900163	-0.0860783	-0.177806	-0.213843	-0.209905	-0.301633
ENSMUSG00000001313	-1.19041	-0.251456	2.63219	0.0945027	1	11	101464999	101471853	1	Rnd2	Rho family GTPase 2 [Source:MGI Symbol;Acc:MGI:1338755]	5.53112	5.22654	5.87494	6.9097	5.42467	7.51048	5.5442	6.61495	-0.321052	0.0280367	-0.441333	-0.402768	-0.0536791	-0.523049	-0.234049	0.11504	-0.35433
ENSMUSG00000001323	1.05518	0.0774943	4.0254	0.569504	1	11	74906359	74925948	-1	Srr	serine racemase [Source:MGI Symbol;Acc:MGI:1351636]	14.7969	17.1367	17.0025	15.7781	16.5536	13.9954	16.312	15.4424	-0.0926221	-0.16185	0.0803418	0.119171	0.049943	0.292134	0.107826	0.0385981	0.28079
ENSMUSG00000001333	1.05146	0.0723902	2.74768	0.62739	1	4	129287617	129308559	1	Sync	syncoilin [Source:MGI Symbol;Acc:MGI:1916078]	6.78389	7.03207	8.48879	8.05225	7.38202	5.76105	7.43492	7.06511	-0.247278	-0.121902	0.235782	-0.195443	-0.0700667	0.287618	0.0761676	0.201544	0.559228
ENSMUSG00000001349	-1.16486	-0.220161	3.11146	0.132087	1	9	22099216	22109630	1	Cnn1	calponin 1 [Source:MGI Symbol;Acc:MGI:104979]	8.15486	5.86006	5.70069	8.51471	6.15168	8.38519	6.57187	7.68386	-0.0622982	0.406678	-0.0401846	-0.539043	-0.0700667	-0.516929	-0.578822	-0.109846	-0.556708
ENSMUSG00000001366	1.03638	0.0515486	4.78286	0.700096	1	9	78081499	78109065	-1	Fbxo9	f-box protein 9 [Source:MGI Symbol;Acc:MGI:1918788]	27.0174	27.7798	27.6073	25.2993	26.2565	27.9607	27.4682	26.5055	0.0947909	0.0412131	-0.0495119	0.134941	0.0813633	-0.00936179	0.12595	0.072372	-0.018353
ENSMUSG00000001376	1.06147	0.086057	5.95128	0.506729	1	6	3498382	3603531	1	Vps50	VPS50 EARP/GARPII complex subunit [Source:MGI Symbol;Acc:MGI:1920538]	63.6551	64.1122	61.3633	56.529	66.4941	55.1372	63.0435	59.3868	0.171287	-0.0629497	0.207252	0.181609	-0.0526278	0.217574	0.118385	-0.115851	0.15435
ENSMUSG00000001379	-1.13029	-0.176699	2.23402	0.26753	1	NA	NA	NA	NA	NA	NA	3.94742	4.7514	4.20706	4.95105	4.05452	5.54991	4.30196	4.85183	-0.326822	-0.03862	-0.491554	-0.0593811	0.228821	-0.224113	-0.234922	0.0532801	-0.399654
ENSMUSG00000001380	-1.05855	-0.0820893	6.74223	0.522654	1	18	36766530	36783205	-1	Hars	histidyl-tRNA synthetase [Source:MGI Symbol;Acc:MGI:108087]	109.133	100.73	102.09	112.079	98.7345	119.444	103.984	110.086	-0.0384205	0.144464	-0.130241	-0.154023	0.0288615	-0.245843	-0.134676	0.0482087	-0.226496
ENSMUSG00000001383	-1.06763	-0.0944134	6.16316	0.465679	1	18	36793923	36799660	1	Zmat2	zinc finger, matrin type 2 [Source:MGI Symbol;Acc:MGI:1913742]	68.2408	73.6784	70.1508	73.6128	81.398	71.3646	70.69	75.4585	-0.109323	-0.254359	-0.064575	0.00128414	-0.143752	0.0460317	-0.0694972	-0.214534	-0.0247496
ENSMUSG00000001403	-1.06616	-0.0924234	5.82603	0.474643	1	2	164769898	164778822	1	Ube2c	ubiquitin-conjugating enzyme E2C [Source:MGI Symbol;Acc:MGI:1915862]	65.9716	50.0481	49.2898	58.3244	48.5983	69.4342	55.1031	58.7856	0.177745	0.440939	-0.0738018	-0.220785	0.0424081	-0.472333	-0.242811	0.0203821	-0.494359
ENSMUSG00000001415	-1.05878	-0.0824079	6.58239	0.521708	1	3	88336260	88362338	1	Smg5	Smg-5 homolog, nonsense mediated mRNA decay factor (C. elegans) [Source:MGI Symbol;Acc:MGI:2447364]	93.4617	89.8965	93.3269	100.245	85.089	107.65	92.2284	97.6614	-0.101084	0.135403	-0.203903	-0.157195	0.0792918	-0.260015	-0.103166	0.133321	-0.205985
ENSMUSG00000001416	-1.05646	-0.079244	8.53814	0.533858	1	3	88297116	88321767	1	Cct3	chaperonin containing Tcp1, subunit 3 (gamma) [Source:MGI Symbol;Acc:MGI:104708]	377.487	351.223	358.048	388.195	339.321	420.647	362.253	382.721	-0.0403529	0.153775	-0.156183	-0.144391	0.0497366	-0.260222	-0.116628	0.0775002	-0.232458
ENSMUSG00000001418	1.09157	0.12641	6.95476	0.324315	1	3	88325023	88331313	1	Glmp	glycosylated lysosomal membrane protein [Source:MGI Symbol;Acc:MGI:1913318]	121.826	133.198	130.145	124.293	108.521	120.017	128.39	117.61	-0.0289178	0.166849	0.0215906	0.0998222	0.295589	0.150331	0.0663737	0.26214	0.116882
ENSMUSG00000001419	-1.01411	-0.0202201	6.36131	0.875098	1	3	88142372	88172086	1	Mef2d	myocyte enhancer factor 2D [Source:MGI Symbol;Acc:MGI:99533]	84.8578	75.6423	79.959	77.6933	75.1624	91.0608	80.153	81.3055	0.127256	0.175036	-0.101783	-0.0385983	0.00918127	-0.267637	0.0414689	0.0892485	-0.18757
ENSMUSG00000001424	-1.04468	-0.0630579	7.8731	0.621295	1	6	28475139	28935162	1	Snd1	staphylococcal nuclease and tudor domain containing 1 [Source:MGI Symbol;Acc:MGI:1929266]	230.96	223.537	236.466	246.573	217.462	257.83	230.321	240.622	-0.0943735	0.0868773	-0.158777	-0.141498	0.0397528	-0.205901	-0.0603792	0.120872	-0.124782
ENSMUSG00000001436	-1.15923	-0.213163	2.96893	0.138789	1	10	77032241	77061002	1	Slc19a1	solute carrier family 19 (folate transporter), member 1 [Source:MGI Symbol;Acc:MGI:103182]	7.75302	7.79229	7.36857	9.60285	6.62704	10.3458	7.63796	8.85855	-0.308704	0.226394	-0.416209	-0.301415	0.233683	-0.40892	-0.382078	0.15302	-0.489583
ENSMUSG00000001440	-1.0173	-0.0247395	9.6625	0.845721	1	11	97159714	97187881	-1	Kpnb1	karyopherin (importin) beta 1 [Source:MGI Symbol;Acc:MGI:107532]	876.446	744.481	775.517	821.982	802.236	813.726	798.815	812.648	0.0925578	0.127639	0.107123	-0.142873	-0.107791	-0.128308	-0.0839486	-0.0488671	-0.0693834
ENSMUSG00000001441	1.0002	0.000294574	7.11264	0.998793	1	11	97205842	97280638	-1	Npepps	aminopeptidase puromycin sensitive [Source:MGI Symbol;Acc:MGI:1101358]	138.916	134.655	137.812	135.61	146.354	129.337	137.128	137.1	0.0347545	-0.0752492	0.103079	-0.0101964	-0.1202	0.0581281	0.0232435	-0.0867603	0.0915679
ENSMUSG00000001445	1.00687	0.0098742	5.71891	0.941659	1	11	97041560	97049213	1	Mrpl10	mitochondrial ribosomal protein L10 [Source:MGI Symbol;Acc:MGI:1333801]	51.5765	52.9939	55.1647	50.245	47.9831	60.4458	53.245	52.8913	0.0377353	0.104186	-0.228927	0.0768485	0.143299	-0.189814	0.134767	0.201218	-0.131896
ENSMUSG00000001467	-1.16098	-0.215345	5.98988	0.095882	1	5	4081145	4104746	-1	Cyp51	cytochrome P450, family 51 [Source:MGI Symbol;Acc:MGI:106040]	61.055	49.6363	60.6911	68.9882	63.0268	67.0514	57.1275	66.3555	-0.176239	-0.0458551	-0.135156	-0.474955	-0.344571	-0.433872	-0.184864	-0.0544797	-0.143781
ENSMUSG00000001472	1.01266	0.018157	8.20649	0.88698	1	8	123373753	123403835	1	Tcf25	transcription factor 25 (basic helix-loop-helix) [Source:MGI Symbol;Acc:MGI:1914105]	281.78	301.872	309.604	298.287	273.331	310.463	297.752	294.027	-0.0821324	0.0439215	-0.139854	0.0172372	0.143291	-0.0404847	0.0537258	0.17978	-0.00399615
ENSMUSG00000001473	-1.04689	-0.0661139	7.538	0.604445	1	18	67390717	67402748	1	Tubb6	tubulin, beta 6 class V [Source:MGI Symbol;Acc:MGI:1915201]	208.599	159.108	175.078	202.014	152.031	214.305	180.929	189.45	0.0462791	0.45637	-0.0389344	-0.344441	0.06565	-0.429655	-0.206452	0.203639	-0.291666
ENSMUSG00000001482	1.06676	0.0932391	5.78102	0.472761	1	8	123423527	123463270	1	Def8	differentially expressed in FDCP 8 [Source:MGI Symbol;Acc:MGI:1346331]	55.9258	58.9173	60.6662	56.9914	52.5969	54.926	58.5031	54.8381	-0.0272321	0.088535	0.0260231	0.0479473	0.163714	0.101202	0.090149	0.205916	0.143404
ENSMUSG00000001493	1.09411	0.129761	2.04324	0.399932	1	11	101877510	101894374	-1	Meox1	mesenchyme homeobox 1 [Source:MGI Symbol;Acc:MGI:103220]	2.90738	5.70168	4.48089	3.61807	5.67633	2.50349	4.36332	3.93263	-0.3155	-0.965237	0.215779	0.656166	0.00642876	1.18744	0.308564	-0.341173	0.839843
ENSMUSG00000001506	-1.01652	-0.023643	11.8703	0.852323	1	11	94936224	94953042	1	Col1a1	collagen, type I, alpha 1 [Source:MGI Symbol;Acc:MGI:88467]	3585.61	3890.45	4346.69	4067.26	3964.87	3985.95	3940.91	4006.03	-0.181839	-0.145057	-0.152707	-0.0641209	-0.0273394	-0.0349893	0.0958597	0.132641	0.124991
ENSMUSG00000001517	-1.01546	-0.0221388	6.51778	0.862594	1	6	128362967	128376146	1	Foxm1	forkhead box M1 [Source:MGI Symbol;Acc:MGI:1347487]	103.838	83.1178	81.9505	85.6096	76.952	110.606	89.6356	91.0559	0.278497	0.432311	-0.0910898	-0.0426146	0.111199	-0.412202	-0.0630198	0.0907936	-0.432607
ENSMUSG00000001518	-1.02821	-0.0401349	4.18954	0.767319	1	6	128409444	128424931	-1	Itfg2	integrin alpha FG-GAP repeat containing 2 [Source:MGI Symbol;Acc:MGI:1915450]	18.9571	17.105	17.4008	17.9815	17.3645	19.666	17.821	18.3374	0.0762201	0.126594	-0.0529658	-0.072096	-0.0217223	-0.201282	-0.0473648	0.00300891	-0.176551
ENSMUSG00000001521	-1.03609	-0.0511488	6.87543	0.690637	1	6	128321161	128355851	-1	Tulp3	tubby-like protein 3 [Source:MGI Symbol;Acc:MGI:1329045]	111.071	113.495	114.561	119.206	108.801	123.365	113.043	117.124	-0.101968	0.0297976	-0.151443	-0.0708266	0.0609386	-0.120302	-0.0573355	0.0744297	-0.106811
ENSMUSG00000001524	-1.00441	-0.00634872	3.50016	0.97155	1	17	35667730	35673739	-1	Gtf2h4	general transcription factor II H, polypeptide 4 [Source:MGI Symbol;Acc:MGI:1338799]	11.2041	11.5934	10.4056	11.9152	9.05975	12.3667	11.0677	11.1139	-0.0887757	0.306478	-0.142433	-0.0394923	0.355761	-0.0931496	-0.195435	0.199819	-0.249092
ENSMUSG00000001525	-1.02636	-0.0375406	10.0859	0.767677	1	17	35833921	35838306	-1	Tubb5	tubulin, beta 5 class I [Source:MGI Symbol;Acc:MGI:107812]	1162.41	957.438	1021.94	1150.11	908.464	1166.11	1047.26	1074.9	0.0153447	0.355617	-0.0045913	-0.264522	0.0757503	-0.284458	-0.170462	0.169811	-0.190398
ENSMUSG00000001542	-1.12825	-0.174084	5.84923	0.179249	1	13	75706757	75772364	1	Ell2	elongation factor RNA polymerase II 2 [Source:MGI Symbol;Acc:MGI:2183438]	60.3696	53.2157	52.1775	59.0045	71.3036	56.7358	55.2542	62.348	0.0329966	-0.240154	0.0895626	-0.148974	-0.422124	-0.0924079	-0.177398	-0.450549	-0.120832
ENSMUSG00000001552	-1.07813	-0.108531	6.11016	0.401386	1	11	100368958	100397763	-1	Jup	junction plakoglobin [Source:MGI Symbol;Acc:MGI:96650]	63.1588	71.9045	75.6523	80.7129	69.7657	76.6732	70.2385	75.7173	-0.353817	-0.143535	-0.27974	-0.166718	0.0435641	-0.092641	-0.0934152	0.116867	-0.0193385
ENSMUSG00000001555	-1.03027	-0.0430292	8.07223	0.735912	1	11	100415697	100424824	1	Fkbp10	FK506 binding protein 10 [Source:MGI Symbol;Acc:MGI:104769]	263.886	261.169	290.212	297.96	253.114	288.897	271.756	279.99	-0.175204	0.0601303	-0.130638	-0.19014	0.0451945	-0.145574	-0.0380127	0.197322	0.00655282
ENSMUSG00000001569	1.00298	0.00429871	6.11312	0.974906	1	5	29434664	29457843	1	Nom1	nucleolar protein with MIF4G domain 1 [Source:MGI Symbol;Acc:MGI:1861749]	72.7791	67.85	66.3171	68.2537	70.4648	67.6245	68.9821	68.781	0.0926175	0.0466229	0.10598	-0.00855911	-0.0545537	0.00480291	-0.0415254	-0.0875199	-0.0281633
ENSMUSG00000001576	-1.00018	-0.000263214	8.00021	0.998638	1	17	26561489	26656931	1	Ergic1	endoplasmic reticulum-golgi intermediate compartment (ERGIC) 1 [Source:MGI Symbol;Acc:MGI:1914708]	249.468	252.078	260.713	263.711	236.7	261.992	254.086	254.134	-0.080106	0.0757927	-0.07067	-0.0650913	0.0908074	-0.0556554	-0.0164962	0.139403	-0.00706024
ENSMUSG00000001604	1.02989	0.0424919	3.04565	0.764772	1	4	136247729	136274898	1	Tcea3	transcription elongation factor A (SII), 3 [Source:MGI Symbol;Acc:MGI:1196908]	8.15486	9.66118	8.73773	8.97717	9.22753	7.51048	8.85125	8.57173	-0.138602	-0.178285	0.118755	0.105938	0.0662548	0.363294	-0.039002	-0.0786853	0.218354
ENSMUSG00000001627	1.03529	0.050034	6.06099	0.69953	1	12	40201567	40248504	-1	Ifrd1	interferon-related developmental regulator 1 [Source:MGI Symbol;Acc:MGI:1316717]	70.3681	67.7233	63.3548	61.072	73.6245	59.8727	67.1487	64.8564	0.204412	-0.0652635	0.233024	0.149141	-0.120534	0.177754	0.0529432	-0.216732	0.0815555
ENSMUSG00000001630	1.06376	0.0891766	5.96432	0.491022	1	6	146724995	146778812	1	Stk38l	serine/threonine kinase 38 like [Source:MGI Symbol;Acc:MGI:1922250]	68.359	67.7549	71.3457	63.4659	69.4861	62.0746	69.1532	65.0088	0.107149	-0.0235935	0.139128	0.0943451	-0.0363978	0.126324	0.168845	0.0381025	0.200824
ENSMUSG00000001632	-1.03579	-0.0507272	5.40677	0.697236	1	6	113307137	113324860	1	Brpf1	bromodomain and PHD finger containing, 1 [Source:MGI Symbol;Acc:MGI:1926033]	44.9581	39.0565	40.1537	42.1927	39.0352	47.4457	41.3894	42.8912	0.0915867	0.203803	-0.0776975	-0.111431	0.000785434	-0.280715	-0.0714592	0.0407572	-0.240743
ENSMUSG00000001642	-1.07478	-0.104045	7.83426	0.415007	1	6	34302434	34317478	-1	Akr1b3	aldo-keto reductase family 1, member B3 (aldose reductase) [Source:MGI Symbol;Acc:MGI:1353494]	225.972	225.28	222.551	238.956	207.256	278.008	224.601	241.407	-0.0805993	0.124733	-0.298983	-0.0850278	0.120304	-0.303411	-0.10261	0.102722	-0.320994
ENSMUSG00000001663	1.14089	0.190163	1.72785	0.240582	1	10	75783813	75798584	-1	Gstt1	glutathione S-transferase, theta 1 [Source:MGI Symbol;Acc:MGI:107379]	2.411	4.11788	3.88344	3.12841	3.66305	2.23203	3.47077	3.00783	-0.375797	-0.603413	0.111276	0.396473	0.168856	0.883545	0.311905	0.0842889	0.798978
ENSMUSG00000001665	1.10088	0.138658	3.05835	0.338671	1	10	75774115	75781414	-1	Gstt3	glutathione S-transferase, theta 3 [Source:MGI Symbol;Acc:MGI:2143526]	8.13122	9.43944	8.0407	7.56259	7.07444	8.59633	8.53712	7.74445	0.104592	0.200856	-0.0802494	0.319822	0.416087	0.134981	0.0884423	0.184707	-0.0963989
ENSMUSG00000001666	-1.17991	-0.238681	3.01103	0.101236	1	10	75771230	75773414	-1	Ddt	D-dopachrome tautomerase [Source:MGI Symbol;Acc:MGI:1298381]	7.11482	7.57056	7.29389	9.14039	7.99719	8.77731	7.32642	8.6383	-0.36143	-0.168667	-0.302952	-0.271856	-0.079093	-0.213378	-0.325568	-0.132805	-0.26709
ENSMUSG00000001674	1.01677	0.0239889	6.7069	0.852724	1	1	121553835	121567989	-1	Ddx18	DEAD (Asp-Glu-Ala-Asp) box polypeptide 18 [Source:MGI Symbol;Acc:MGI:1914192]	113.057	104.848	100.969	108.841	99.0981	105.69	106.291	104.543	0.0548233	0.190122	0.0972169	-0.0539345	0.0813642	-0.0115409	-0.10831	0.0269888	-0.0659163
ENSMUSG00000001687	1.08476	0.117378	5.63323	0.366415	1	5	148504635	148552789	-1	Ubl3	ubiquitin-like 3 [Source:MGI Symbol;Acc:MGI:1344373]	51.6947	56.5416	54.3183	44.8859	57.8818	47.0536	54.1849	49.9404	0.203755	-0.163093	0.135711	0.333053	-0.0337951	0.265009	0.275178	-0.0916699	0.207134
ENSMUSG00000001700	-1.02173	-0.031014	4.23915	0.822626	1	18	56432132	56503792	1	Gramd3	GRAM domain containing 3 [Source:MGI Symbol;Acc:MGI:1914815]	17.5625	19.4174	19.9151	18.1992	20.1328	19.7866	18.965	19.3729	-0.0513759	-0.19705	-0.17203	0.0934757	-0.0521983	-0.027178	0.129987	-0.0156872	0.00933304
ENSMUSG00000001707	-1.12708	-0.172584	5.47584	0.185278	1	13	38645698	38659028	-1	Eef1e1	eukaryotic translation elongation factor 1 epsilon 1 [Source:MGI Symbol;Acc:MGI:1913393]	47.1091	40.7987	38.9339	41.295	49.9964	51.7288	42.2806	47.6734	0.190038	-0.0858202	-0.134963	-0.0174443	-0.293303	-0.342445	-0.0849382	-0.360796	-0.409939
ENSMUSG00000001729	-1.03801	-0.0538173	8.27888	0.672882	1	12	112653821	112674884	-1	Akt1	thymoma viral proto-oncogene 1 [Source:MGI Symbol;Acc:MGI:87986]	319.339	291.229	304.924	337.433	283.788	329.104	305.164	316.775	-0.0795097	0.170275	-0.0434517	-0.212446	0.0373386	-0.176388	-0.146148	0.103636	-0.110091
ENSMUSG00000001739	1.00939	0.0134862	3.43405	0.922024	1	5	136966616	136975858	1	Cldn15	claudin 15 [Source:MGI Symbol;Acc:MGI:1913103]	8.34395	11.8151	12.3971	10.691	10.8214	10.6775	10.8521	10.73	-0.357593	-0.375081	-0.355777	0.144241	0.126754	0.146057	0.213609	0.196122	0.215425
ENSMUSG00000001741	-1.08825	-0.122013	5.53377	0.350937	1	7	83642825	83745726	-1	Il16	interleukin 16 [Source:MGI Symbol;Acc:MGI:1270855]	40.7506	48.9077	45.7548	55.7129	42.8381	48.7427	45.1377	49.0979	-0.451188	-0.0720717	-0.258364	-0.187948	0.191168	0.00487626	-0.284086	0.0950302	-0.0912616
ENSMUSG00000001750	-1.0032	-0.0046164	7.00467	0.971801	1	19	3896050	3907133	-1	Tcirg1	T cell, immune regulator 1, ATPase, H+ transporting, lysosomal V0 protein A3 [Source:MGI Symbol;Acc:MGI:1350931]	127.358	133.799	124.444	125.653	110.591	150.602	128.534	128.948	0.0194374	0.203657	-0.241853	0.0906242	0.274844	-0.170666	-0.013948	0.170272	-0.275239
ENSMUSG00000001751	1.0067	0.00963667	3.90085	0.944374	1	11	101070012	101077672	1	Naglu	alpha-N-acetylglucosaminidase (Sanfilippo disease IIIB) [Source:MGI Symbol;Acc:MGI:1351641]	12.9532	16.4082	16.9278	15.9141	14.4565	15.5639	15.4297	15.3115	-0.296993	-0.158404	-0.264891	0.0441104	0.182699	0.0762117	0.0890912	0.22768	0.121193
ENSMUSG00000001755	1.04209	0.0594865	3.59755	0.667461	1	11	101082565	101086619	1	Coasy	Coenzyme A synthase [Source:MGI Symbol;Acc:MGI:1918993]	10.5422	13.6524	12.671	11.9152	11.6323	11.7634	12.2885	11.7703	-0.176619	-0.141955	-0.158126	0.196352	0.231016	0.214844	0.0887278	0.123392	0.10722
ENSMUSG00000001761	1.02221	0.0316905	6.57215	0.806223	1	6	29735503	29761365	1	Smo	smoothened, frizzled class receptor [Source:MGI Symbol;Acc:MGI:108075]	88.4979	92.6839	99.0774	94.5867	85.117	94.4691	93.4198	91.3909	-0.0959945	0.0561969	-0.0941999	-0.0293184	0.122873	-0.0275237	0.0669184	0.21911	0.0687131
ENSMUSG00000001767	1.03916	0.0554131	5.54504	0.671383	1	2	145917479	145935014	-1	Crnkl1	Crn, crooked neck-like 1 (Drosophila) [Source:MGI Symbol;Acc:MGI:1914127]	46.1636	48.2109	49.1404	45.5659	48.4585	44.0675	47.8383	46.0306	0.018799	-0.0699949	0.0670397	0.0814021	-0.00739172	0.129643	0.108954	0.0201601	0.157195
ENSMUSG00000001768	1.03564	0.0505181	5.46899	0.697021	1	2	145784734	145887616	1	Rin2	Ras and Rab interactor 2 [Source:MGI Symbol;Acc:MGI:1921280]	38.6706	51.0934	47.0244	39.8532	52.6528	39.4828	45.5961	43.9963	-0.0434598	-0.445275	-0.0299884	0.358441	-0.043375	0.371912	0.238715	-0.163101	0.252186
ENSMUSG00000001774	-1.01764	-0.0252215	7.00914	0.844657	1	9	18292125	18317442	1	Chordc1	cysteine and histidine-rich domain (CHORD)-containing, zinc-binding protein 1 [Source:MGI Symbol;Acc:MGI:1914167]	134.472	130.537	122.378	117.846	156.225	120.137	129.129	131.403	0.19041	-0.216314	0.162624	0.147556	-0.259168	0.11977	0.0544447	-0.352279	0.0266583
ENSMUSG00000001783	-1.02892	-0.0411276	7.05642	0.748616	1	10	85938637	85957823	-1	Rtcb	RNA 2',3'-cyclic phosphate and 5'-OH ligase [Source:MGI Symbol;Acc:MGI:106379]	132.865	131.265	130.469	134.494	132.625	138.899	131.533	135.339	-0.0175838	0.00261174	-0.0640704	-0.0350599	-0.0148643	-0.0815464	-0.0438436	-0.023648	-0.0903302
ENSMUSG00000001785	-1.0363	-0.0514441	5.52383	0.692954	1	10	85829494	85889096	1	Pwp1	PWP1 homolog, endonuclein [Source:MGI Symbol;Acc:MGI:1914735]	50.1583	43.6178	43.1659	47.7966	44.5438	49.6174	45.6473	47.3193	0.0695786	0.171263	0.015641	-0.131991	-0.0303061	-0.185928	-0.147017	-0.0453326	-0.200955
ENSMUSG00000001786	1.06564	0.0917215	4.25308	0.495806	1	10	86021972	86051873	1	Fbxo7	F-box protein 7 [Source:MGI Symbol;Acc:MGI:1917004]	18.9098	21.413	19.6163	20.2394	17.5603	18.3992	19.9797	18.733	-0.0980345	0.10682	0.0394947	0.0813155	0.28617	0.218845	-0.045114	0.159741	0.0924152
ENSMUSG00000001794	1.03536	0.0501373	8.019	0.694412	1	7	30186936	30198811	-1	Capns1	calpain, small subunit 1 [Source:MGI Symbol;Acc:MGI:88266]	252.895	273.649	282.097	277.068	236.337	267.602	269.547	260.336	-0.131702	0.0976961	-0.0815514	-0.0179149	0.211483	0.0322357	0.0259496	0.255348	0.0761001
ENSMUSG00000001802	-1.02634	-0.037505	2.53393	0.823461	1	7	35200027	35215498	-1	Lrp3	low density lipoprotein receptor-related protein 3 [Source:MGI Symbol;Acc:MGI:3584516]	4.51472	5.98676	5.67579	5.71274	5.34078	5.48959	5.39242	5.51437	-0.339549	-0.242415	-0.282062	0.0675918	0.164725	0.125078	-0.00936247	0.0877709	0.0481242
ENSMUSG00000001827	1.14638	0.197086	2.21806	0.188408	1	7	101858331	101870788	-1	Folr1	folate receptor 1 (adult) [Source:MGI Symbol;Acc:MGI:95568]	3.87651	7.41218	5.42685	5.54952	5.08912	3.77032	5.57185	4.80299	-0.517605	-0.392658	0.0400716	0.417534	0.542482	0.975211	-0.032248	0.0926994	0.525429
ENSMUSG00000001829	1.05554	0.0779838	4.87556	0.556095	1	7	101663633	101795506	1	Clpb	ClpB caseinolytic peptidase B [Source:MGI Symbol;Acc:MGI:1100517]	29.7829	31.2959	29.549	30.6856	25.865	29.2878	30.2093	28.6128	-0.0430752	0.203483	0.0241845	0.0284108	0.274969	0.0956704	-0.0544541	0.192104	0.0128056
ENSMUSG00000001833	-1.02173	-0.0310105	8.61149	0.808021	1	9	25252439	25308571	1	7-Sep	septin 7 [Source:MGI Symbol;Acc:MGI:1335094]	378.456	409.222	392.352	352.014	543.25	310.343	393.343	401.869	0.104494	-0.521489	0.286265	0.217252	-0.408731	0.399022	0.156514	-0.469469	0.338285
ENSMUSG00000001844	1.05661	0.0794364	3.80316	0.56446	1	5	143316489	143329256	-1	Zdhhc4	zinc finger, DHHC domain containing 4 [Source:MGI Symbol;Acc:MGI:1920131]	13.0478	15.4896	14.5629	14.2275	12.1076	14.4177	14.3667	13.5843	-0.124875	0.107886	-0.144038	0.122618	0.355379	0.103455	0.0336187	0.266379	0.0144549
ENSMUSG00000001847	1.03622	0.0513334	8.65206	0.687044	1	5	143503634	143528036	-1	Rac1	RAS-related C3 botulinum substrate 1 [Source:MGI Symbol;Acc:MGI:97845]	418.947	401.018	407.412	394.315	409.814	380.35	409.126	394.826	0.087417	0.0317976	0.13944	0.024317	-0.0313024	0.0763398	0.0471395	-0.00847992	0.0991623
ENSMUSG00000001855	-1.01791	-0.0256075	6.44574	0.842177	1	2	31974436	32053975	1	Nup214	nucleoporin 214 [Source:MGI Symbol;Acc:MGI:1095411]	89.8216	80.8371	87.2777	87.4322	78.2103	96.9726	85.9788	87.5384	0.0388976	0.199704	-0.110515	-0.113147	0.0476597	-0.26256	-0.0025509	0.158255	-0.151964
ENSMUSG00000001870	-1.03418	-0.0484932	8.65849	0.703446	1	17	75005568	75392512	1	Ltbp1	latent transforming growth factor beta binding protein 1 [Source:MGI Symbol;Acc:MGI:109151]	397.626	404.787	409.951	384.005	437.161	432.652	404.122	417.939	0.050286	-0.136753	-0.121794	0.0760385	-0.111	-0.0960417	0.0943271	-0.0927119	-0.0777532
ENSMUSG00000001891	1.04374	0.0617597	6.98695	0.629882	1	11	21321138	21371201	-1	Ugp2	UDP-glucose pyrophosphorylase 2 [Source:MGI Symbol;Acc:MGI:2183447]	122.11	131.297	127.332	117.574	146.746	100.411	126.913	121.577	0.0546167	-0.265135	0.282263	0.159268	-0.160484	0.386914	0.115028	-0.204724	0.342674
ENSMUSG00000001909	-1.05289	-0.0743543	5.39651	0.570202	1	8	84686307	84699808	1	Trmt1	tRNA methyltransferase 1 [Source:MGI Symbol;Acc:MGI:1289155]	41.2707	40.3869	38.4859	44.9947	33.8343	47.687	40.0478	42.172	-0.124638	0.286631	-0.20848	-0.155867	0.255402	-0.239709	-0.225426	0.185843	-0.309268
ENSMUSG00000001910	-1.0014	-0.00202002	7.05733	0.987613	1	8	84670483	84687862	-1	Nacc1	nucleus accumbens associated 1, BEN and BTB (POZ) domain containing [Source:MGI Symbol;Acc:MGI:1914080]	136.765	128.288	130.568	131.856	119.818	144.539	131.874	132.071	0.0527423	0.190856	-0.0797577	-0.0395753	0.0985383	-0.172075	-0.0141563	0.123957	-0.146656
ENSMUSG00000001911	1.06686	0.0933699	7.90527	0.464255	1	8	84699876	84800344	-1	Nfix	nuclear factor I/X [Source:MGI Symbol;Acc:MGI:97311]	212.877	263.291	260.34	215.996	263.152	211.138	245.503	230.095	-0.0209844	-0.305877	0.0118355	0.285652	0.000759201	0.318471	0.269389	-0.0155032	0.302209
ENSMUSG00000001918	1.02089	0.0298255	5.30418	0.821963	1	7	16781340	16798274	1	Slc1a5	solute carrier family 1 (neutral amino acid transporter), member 5 [Source:MGI Symbol;Acc:MGI:105305]	39.3797	39.69	40.9503	39.8532	36.0992	41.6243	40.0067	39.1922	-0.0172442	0.125484	-0.0799759	-0.00591937	0.136809	-0.0686511	0.03918	0.181908	-0.0235518
ENSMUSG00000001924	-1.01196	-0.0171571	9.14168	0.892818	1	X	20658326	20683179	1	Uba1	ubiquitin-like modifier activating enzyme 1 [Source:MGI Symbol;Acc:MGI:98890]	562.118	546.379	567.828	589.501	523.341	583.555	558.775	565.466	-0.0686217	0.103122	-0.0539966	-0.109592	0.0621522	-0.0949664	-0.0540397	0.117704	-0.0394146
ENSMUSG00000001942	1.01116	0.0160119	4.16158	0.90994	1	9	37555698	37649655	1	Siae	sialic acid acetylesterase [Source:MGI Symbol;Acc:MGI:104803]	17.0661	17.2951	18.4961	18.0904	17.5603	16.6196	17.6191	17.4234	-0.0840874	-0.0411809	0.0382504	-0.0648585	-0.021952	0.0574793	0.0320009	0.0749074	0.154339
ENSMUSG00000001946	1.07886	0.109508	0.457227	0.658846	1	9	37528078	37538319	1	Esam	endothelial cell-specific adhesion molecule [Source:MGI Symbol;Acc:MGI:1916774]	1.08731	1.07698	1.69278	1.38738	1.2583	0.935039	1.28569	1.19357	-0.351595	-0.210706	0.21767	-0.365368	-0.224479	0.203897	0.287031	0.427919	0.856295
ENSMUSG00000001962	-1.09299	-0.128275	5.36341	0.327296	1	X	74313033	74320149	1	Fam50a	family with sequence similarity 50, member A [Source:MGI Symbol;Acc:MGI:1351626]	39.5451	40.7036	37.9133	43.6617	39.4826	45.9979	39.3874	43.0474	-0.142868	0.00228215	-0.218068	-0.10121	0.0439398	-0.17641	-0.203664	-0.0585144	-0.278864
ENSMUSG00000001964	-1.01395	-0.0199904	5.78057	0.877937	1	X	74254687	74261548	1	Emd	emerin [Source:MGI Symbol;Acc:MGI:108117]	58.0531	52.5505	54.3183	58.6508	50.304	58.3042	54.974	55.753	-0.0147785	0.2067	-0.00622715	-0.158448	0.0630303	-0.149897	-0.110713	0.110766	-0.102162
ENSMUSG00000001983	1.05455	0.076634	3.06174	0.60444	1	11	106066061	106073612	1	Taco1	translational activator of mitochondrially encoded cytochrome c oxidase I [Source:MGI Symbol;Acc:MGI:1917457]	8.88761	8.67922	8.0656	7.83462	7.94127	8.53601	8.54414	8.10396	0.181932	0.162427	0.0582345	0.147702	0.128197	0.0240045	0.041918	0.0224126	-0.0817794
ENSMUSG00000001986	-1.03566	-0.0505448	6.33207	0.696317	1	X	41400854	41678601	1	Gria3	glutamate receptor, ionotropic, AMPA3 (alpha 3) [Source:MGI Symbol;Acc:MGI:95810]	76.112	78.9366	78.6894	76.6052	95.5189	69.9168	77.9126	80.6803	-0.00931854	-0.327662	0.122484	0.0432516	-0.275092	0.175054	0.0387267	-0.279617	0.170529
ENSMUSG00000001995	-1.01182	-0.0169467	5.91127	0.897012	1	8	125418063	125569808	-1	Sipa1l2	signal-induced proliferation-associated 1 like 2 [Source:MGI Symbol;Acc:MGI:2676970]	62.3078	58.4105	58.0773	64.6356	57.8538	58.4249	59.5985	60.3048	-0.0529164	0.107002	0.0928303	-0.146101	0.0138166	-0.000354595	-0.154355	0.00556239	-0.00860879
ENSMUSG00000001998	-1.00695	-0.00998735	4.89894	0.941837	1	2	127008717	127067909	1	Ap4e1	adaptor-related protein complex AP-4, epsilon 1 [Source:MGI Symbol;Acc:MGI:1336993]	30.2321	28.35	28.8519	28.1829	32.2404	27.6289	29.1447	29.3507	0.10126	-0.0927915	0.129901	0.00853047	-0.185521	0.0371708	0.0338496	-0.160202	0.0624899
ENSMUSG00000001999	-1.02856	-0.0406325	3.89462	0.76717	1	2	127070665	127097084	1	Blvra	biliverdin reductase A [Source:MGI Symbol;Acc:MGI:88170]	15.3406	14.1592	15.4591	15.9413	13.8133	16.5291	14.9863	15.4279	-0.0554141	0.151292	-0.107653	-0.171031	0.0356754	-0.22327	-0.0443144	0.162392	-0.0965538
ENSMUSG00000002006	-1.01358	-0.019455	2.9186	0.912742	1	X	73793359	73824969	-1	Pdzd4	PDZ domain containing 4 [Source:MGI Symbol;Acc:MGI:2443483]	6.5948	8.01403	7.59262	7.10013	8.50051	6.8469	7.40048	7.48251	-0.106517	-0.366221	-0.0541233	0.174682	-0.0850224	0.227076	0.0967525	-0.162952	0.149146
ENSMUSG00000002010	1.03166	0.0449724	5.6874	0.730064	1	X	73778963	73786897	-1	Idh3g	isocitrate dehydrogenase 3 (NAD+), gamma [Source:MGI Symbol;Acc:MGI:1099463]	48.2909	54.0709	52.7251	52.6933	44.0125	53.5989	51.6957	50.1016	-0.125867	0.133838	-0.150451	0.037234	0.296939	0.0126501	0.000871672	0.260577	-0.0237122
ENSMUSG00000002014	-1.04129	-0.0583729	6.52728	0.650635	1	X	73787028	73790830	1	Ssr4	signal sequence receptor, delta [Source:MGI Symbol;Acc:MGI:1099464]	87.2688	95.5665	97.31	106.23	79.6923	105.78	93.3817	97.2341	-0.283652	0.131025	-0.277531	-0.152613	0.262064	-0.146492	-0.12653	0.288147	-0.120409
ENSMUSG00000002015	-1.01028	-0.0147616	7.31602	0.908465	1	X	73686178	73716175	-1	Bcap31	B cell receptor associated protein 31 [Source:MGI Symbol;Acc:MGI:1350933]	156.266	156.004	162.631	157.645	154.967	167.191	158.301	159.934	-0.012672	0.0120466	-0.0974946	-0.0150901	0.00962859	-0.0999126	0.04493	0.0696487	-0.0398925
ENSMUSG00000002017	-1.00641	-0.00921375	6.93228	0.943438	1	17	75537086	75551946	-1	Fam98a	family with sequence similarity 98, member A [Source:MGI Symbol;Acc:MGI:1919972]	125.301	119.894	120.536	122.117	136.008	109.943	121.91	122.689	0.0371385	-0.118294	0.18865	-0.0265059	-0.181938	0.125005	-0.018798	-0.17423	0.132713
ENSMUSG00000002028	-1.08895	-0.122934	7.50146	0.336037	1	9	44803355	44881296	-1	Kmt2a	lysine (K)-specific methyltransferase 2A [Source:MGI Symbol;Acc:MGI:96995]	181.463	154.262	169.029	175.626	174.792	199.314	168.251	183.244	0.0471702	0.0540404	-0.135367	-0.187124	-0.180254	-0.369661	-0.055236	-0.0483657	-0.237773
ENSMUSG00000002031	-1.0445	-0.0628064	5.2322	0.633335	1	9	44767908	44793447	1	Ift46	intraflagellar transport 46 [Source:MGI Symbol;Acc:MGI:1923818]	35.4086	37.2193	36.818	38.4114	34.2817	41.6243	36.482	38.1058	-0.117434	0.0466634	-0.233327	-0.0454844	0.118613	-0.161377	-0.061125	0.102973	-0.177017
ENSMUSG00000002043	-1.09613	-0.132422	2.13552	0.416712	1	7	19508395	19516145	1	Trappc6a	trafficking protein particle complex 6A [Source:MGI Symbol;Acc:MGI:1914341]	3.87651	4.40296	3.75897	4.5974	3.24362	5.33877	4.01281	4.39326	-0.246059	0.257156	-0.46175	-0.0623435	0.440872	-0.278034	-0.290482	0.212733	-0.506172
ENSMUSG00000002052	-1.03011	-0.0427991	7.71666	0.737661	1	11	78206746	78245987	-1	Supt6	suppressor of Ty 6 [Source:MGI Symbol;Acc:MGI:107726]	210.064	201.618	208.585	210.991	209.297	218.679	206.756	212.989	-0.00634821	0.00527897	-0.0579806	-0.0655574	-0.0539302	-0.11719	-0.0165417	-0.00491451	-0.0681741
ENSMUSG00000002055	-1.08384	-0.116149	5.51611	0.371206	1	11	78301529	78322457	1	Spag5	sperm associated antigen 5 [Source:MGI Symbol;Acc:MGI:1927470]	51.8365	37.3777	39.0833	46.1916	39.9021	53.0861	42.7658	46.3933	0.166337	0.377505	-0.0343657	-0.305455	-0.0942869	-0.506158	-0.241079	-0.029911	-0.441782
ENSMUSG00000002058	1.06861	0.095731	3.22854	0.500705	1	11	78343482	78349164	1	Unc119	unc-119 lipid binding chaperone [Source:MGI Symbol;Acc:MGI:1328357]	8.67487	10.9599	9.83306	9.54845	8.05311	9.92348	9.82261	9.17501	-0.138423	0.107296	-0.194004	0.198896	0.444615	0.143315	0.0423747	0.288094	-0.0132061
ENSMUSG00000002059	1.00798	0.0114607	5.73409	0.930198	1	11	78188430	78192193	1	Rab34	RAB34, member RAS oncogene family [Source:MGI Symbol;Acc:MGI:104606]	50.5601	56.795	53.4719	55.3048	49.0177	55.1975	53.609	53.1733	-0.129406	0.0446953	-0.126603	0.0383602	0.212461	0.0411625	-0.0486232	0.125478	-0.0458208
ENSMUSG00000002064	-1.06147	-0.0860672	6.19299	0.505403	1	11	78245746	78255496	1	Sdf2	stromal cell derived factor 2 [Source:MGI Symbol;Acc:MGI:108019]	70.2263	74.882	74.9553	79.0535	71.5553	82.9772	73.3545	77.862	-0.170818	-0.0270467	-0.240704	-0.0782098	0.0655615	-0.148095	-0.076799	0.0669723	-0.146685
ENSMUSG00000002068	-1.11578	-0.158058	5.1912	0.227862	1	7	38097984	38107534	-1	Ccne1	cyclin E1 [Source:MGI Symbol;Acc:MGI:88316]	38.5051	33.6399	32.4864	42.2199	32.8836	41.6847	34.8771	38.9294	-0.132874	0.227683	-0.114467	-0.32775	0.0328073	-0.309343	-0.378086	-0.0175285	-0.359679
ENSMUSG00000002083	-1.03475	-0.0492818	1.88896	0.784409	1	7	16308393	16318205	1	Bbc3	BCL2 binding component 3 [Source:MGI Symbol;Acc:MGI:2181667]	3.82924	3.86447	3.80875	4.27096	4.05452	3.55918	3.83415	3.96155	-0.157503	-0.0824743	0.105511	-0.144289	-0.0692602	0.118725	-0.16524	-0.0902115	0.0977736
ENSMUSG00000002102	-1.05737	-0.0804793	7.92687	0.528295	1	2	91054009	91066369	1	Psmc3	proteasome (prosome, macropain) 26S subunit, ATPase 3 [Source:MGI Symbol;Acc:MGI:1098754]	239.091	238.045	238.209	248.532	228.088	279.788	238.448	252.136	-0.0558701	0.0679706	-0.226774	-0.0621947	0.061646	-0.233099	-0.0612014	0.0626392	-0.232106
ENSMUSG00000002103	1.0684	0.0954524	6.07026	0.460268	1	2	91202885	91214098	1	Acp2	acid phosphatase 2, lysosomal [Source:MGI Symbol;Acc:MGI:87882]	61.646	72.2846	72.3415	63.1122	67.8363	62.0746	68.7573	64.341	-0.0339128	-0.138051	-0.00999519	0.195769	0.0916308	0.219687	0.196903	0.0927649	0.220821
ENSMUSG00000002105	1.0506	0.0712087	6.13443	0.582674	1	2	91061791	91070417	-1	Slc39a13	solute carrier family 39 (metal ion transporter), member 13 [Source:MGI Symbol;Acc:MGI:1915677]	69.1154	70.7642	77.2206	69.0154	61.0135	76.6431	72.3667	68.8907	0.0020879	0.179877	-0.149149	0.0361006	0.21389	-0.115136	0.162068	0.339857	0.0108312
ENSMUSG00000002107	1.07068	0.0985212	7.07066	0.441967	1	2	6539694	7509563	-1	Celf2	CUGBP, Elav-like family member 2 [Source:MGI Symbol;Acc:MGI:1338822]	130.903	140.673	138.708	112.623	159.664	110.878	136.762	127.721	0.217002	-0.286541	0.239532	0.320849	-0.182695	0.343379	0.300558	-0.202986	0.323087
ENSMUSG00000002108	-1.09823	-0.135186	1.95043	0.426297	1	2	91184061	91202834	-1	Nr1h3	nuclear receptor subfamily 1, group H, member 3 [Source:MGI Symbol;Acc:MGI:1352462]	3.12012	3.92782	3.83365	4.54299	2.85214	4.52438	3.6272	3.97317	-0.542042	0.129554	-0.536121	-0.209913	0.461683	-0.203992	-0.244925	0.426671	-0.239003
ENSMUSG00000002109	-1.15784	-0.211435	2.91691	0.152983	1	2	91211572	91236982	-1	Ddb2	damage specific DNA binding protein 2 [Source:MGI Symbol;Acc:MGI:1355314]	7.20936	7.15877	6.27324	7.56259	7.3261	9.01861	6.88046	7.9691	-0.0690075	-0.0231728	-0.323032	-0.0791672	-0.0333325	-0.333192	-0.269668	-0.223833	-0.523693
ENSMUSG00000002129	-1.01712	-0.0244892	6.8865	0.848962	1	11	4160350	4182541	1	Sf3a1	splicing factor 3a, subunit 1 [Source:MGI Symbol;Acc:MGI:1914715]	122.772	117.961	118.669	118.88	123.146	123.546	119.801	121.857	0.0464808	-0.00438366	-0.00906578	-0.0111853	-0.0620498	-0.0667319	-0.00255862	-0.0534231	-0.0581052
ENSMUSG00000002147	1.0339	0.0480926	7.2216	0.707561	1	10	127642986	127660957	1	Stat6	signal transducer and activator of transcription 6 [Source:MGI Symbol;Acc:MGI:103034]	148.915	152.298	156.532	151.333	139.448	151.959	152.582	147.58	-0.0232432	0.0947644	-0.0291954	0.00916868	0.127176	0.00321648	0.0487311	0.166739	0.042779
ENSMUSG00000002205	1.01667	0.0238486	4.372	0.859958	1	7	44748413	44777515	1	Vrk3	vaccinia related kinase 3 [Source:MGI Symbol;Acc:MGI:2182465]	18.3898	22.5216	23.1761	21.2188	19.8252	21.9583	21.3625	21.0008	-0.206436	-0.108431	-0.255864	0.0859703	0.183976	0.0365418	0.1273	0.225305	0.0778716
ENSMUSG00000002210	1.07781	0.1081	2.95633	0.463963	1	7	24399619	24422778	1	Smg9	smg-9 homolog, nonsense mediated mRNA decay factor (C. elegans) [Source:MGI Symbol;Acc:MGI:1919247]	8.72215	8.52084	7.59262	7.50818	6.71093	8.83763	8.27854	7.68558	0.216221	0.378171	-0.0189759	0.182533	0.344483	-0.0526638	0.016134	0.178085	-0.219063
ENSMUSG00000002221	1.05919	0.0829663	5.06873	0.531541	1	5	27740080	27791691	-1	Paxip1	PAX interacting (with transcription-activation domain) protein 1 [Source:MGI Symbol;Acc:MGI:1890430]	36.425	33.0064	32.6607	31.5833	28.7731	36.0744	34.0307	32.1436	0.205767	0.340209	0.0139534	0.0635822	0.198024	-0.128231	0.0483928	0.182834	-0.143421
ENSMUSG00000002222	1.05077	0.071445	5.62923	0.582726	1	6	71388634	71440637	-1	Rmnd5a	required for meiotic nuclear division 5 homolog A [Source:MGI Symbol;Acc:MGI:1915727]	46.2818	50.6816	52.7251	45.5115	58.8604	38.035	49.8962	47.469	0.0242114	-0.346855	0.283116	0.155229	-0.215837	0.414134	0.212258	-0.158808	0.471163
ENSMUSG00000002227	1.03371	0.0478372	7.14681	0.709049	1	3	104794836	104818563	-1	Mov10	Moloney leukemia virus 10 [Source:MGI Symbol;Acc:MGI:97054]	138.113	150.746	146.102	138.765	131.003	150.994	144.987	140.254	-0.00680271	0.076245	-0.128645	0.119473	0.202521	-0.00236913	0.0743276	0.157375	-0.0475147
ENSMUSG00000002228	-1.04758	-0.0670634	0.419469	0.787249	1	3	104781056	104786018	1	Ppm1j	protein phosphatase 1J [Source:MGI Symbol;Acc:MGI:1919137]	1.25277	1.20369	1.66789	1.38738	1.53792	1.41764	1.37478	1.44765	-0.147237	-0.295854	-0.178364	-0.204903	-0.353521	-0.236031	0.265657	0.117039	0.234529
ENSMUSG00000002233	-1.01347	-0.0192966	8.36083	0.879783	1	3	104788375	104794459	1	Rhoc	ras homolog family member C [Source:MGI Symbol;Acc:MGI:106028]	328.062	342.544	342.215	342.629	294.778	389.067	337.607	342.158	-0.0626794	0.15434	-0.246052	-0.000355976	0.216663	-0.183728	-0.00174127	0.215278	-0.185114
ENSMUSG00000002249	1.02281	0.0325377	4.63195	0.809526	1	17	28331671	28350805	-1	Tead3	TEA domain family member 3 [Source:MGI Symbol;Acc:MGI:109241]	22.6681	25.1191	24.4955	23.0686	21.9224	25.6683	24.0942	23.5531	-0.0252653	0.048262	-0.179324	0.122851	0.196379	-0.0312076	0.0865871	0.160114	-0.067472
ENSMUSG00000002250	-1.09125	-0.125981	4.65062	0.343396	1	17	28232754	28301469	1	Ppard	peroxisome proliferator activator receptor delta [Source:MGI Symbol;Acc:MGI:101884]	24.6773	23.5669	24.4706	27.3124	22.4257	29.6498	24.2383	26.4626	-0.146369	0.138032	-0.264838	-0.21279	0.071612	-0.331258	-0.158503	0.125899	-0.276971
ENSMUSG00000002257	-1.04529	-0.0639005	2.9511	0.677031	1	17	28207778	28228608	1	Def6	differentially expressed in FDCP 6 [Source:MGI Symbol;Acc:MGI:1346328]	8.06031	8.42581	6.67154	8.56912	7.66164	7.93275	7.71922	8.05451	-0.088312	0.0731806	0.0230129	-0.0243307	0.137162	0.0869941	-0.361126	-0.199633	-0.249801
ENSMUSG00000002265	-1.17305	-0.230263	6.359	0.0734414	1	7	6703892	6730431	-1	Peg3	paternally expressed 3 [Source:MGI Symbol;Acc:MGI:104748]	90.1052	69.2754	81.7762	93.4714	92.1075	97.4251	80.3856	94.3347	-0.0529138	-0.0317076	-0.112682	-0.432182	-0.410976	-0.49195	-0.192844	-0.171637	-0.252612
ENSMUSG00000002274	1.04923	0.0693333	2.59856	0.656212	1	17	25794571	25797136	-1	Metrn	meteorin, glial cell differentiation regulator [Source:MGI Symbol;Acc:MGI:1917333]	6.42934	5.57497	6.17367	6.61046	4.89339	5.85154	6.05933	5.78513	-0.0400816	0.393837	0.135854	-0.245786	0.188132	-0.0698505	-0.0986232	0.335295	0.0773123
ENSMUSG00000002279	1.04906	0.0691011	4.30152	0.610853	1	17	25579174	25662826	1	Lmf1	lipase maturation factor 1 [Source:MGI Symbol;Acc:MGI:1923733]	19.4062	20.2093	21.9066	21.1372	16.5536	20.963	20.5073	19.5513	-0.123264	0.22937	-0.111327	-0.0647633	0.287871	-0.0528259	0.051582	0.404216	0.0635194
ENSMUSG00000002280	-1.01508	-0.0215989	3.75305	0.88259	1	17	25773776	25783332	1	Narfl	nuclear prelamin A recognition factor-like [Source:MGI Symbol;Acc:MGI:1914813]	12.8114	13.6207	12.9199	13.7922	12.0237	14.1161	13.1173	13.3107	-0.106425	0.091541	-0.139912	-0.0180542	0.179912	-0.0515412	-0.0942582	0.103708	-0.127745
ENSMUSG00000002289	-1.07663	-0.106527	4.80075	0.41857	1	17	33773750	33781575	-1	Angptl4	angiopoietin-like 4 [Source:MGI Symbol;Acc:MGI:1888999]	34.4159	25.0874	21.2842	29.271	21.0555	36.7682	26.9292	29.0316	0.2336	0.708873	-0.0953838	-0.222511	0.252762	-0.551495	-0.459689	0.0155843	-0.788673
ENSMUSG00000002297	1.01954	0.0279132	5.46609	0.833789	1	5	8396973	8422716	-1	Dbf4	DBF4 zinc finger [Source:MGI Symbol;Acc:MGI:1351328]	47.9836	41.3688	41.4482	41.0502	43.7329	43.5547	43.6002	42.7793	0.225155	0.133824	0.139713	0.011157	-0.080174	-0.0742851	0.0139224	-0.0774086	-0.0715197
ENSMUSG00000002307	1.02375	0.0338642	7.29876	0.791621	1	17	33909414	33915589	1	Daxx	Fas death domain-associated protein [Source:MGI Symbol;Acc:MGI:1197015]	163.924	166.647	155.761	158.433	150.716	165.894	162.111	158.348	0.0491536	0.121195	-0.0172318	0.0729216	0.144963	0.00653613	-0.0245462	0.0474956	-0.0909317
ENSMUSG00000002308	1.06273	0.0877791	3.34268	0.537127	1	17	33843091	33849774	1	Cd320	CD320 antigen [Source:MGI Symbol;Acc:MGI:1860083]	9.26581	10.9916	10.6795	9.24921	9.78677	10.0441	10.3123	9.69337	0.00258701	-0.0789165	-0.116365	0.248996	0.167492	0.130044	0.207436	0.125932	0.0884843
ENSMUSG00000002319	-1.00281	-0.00404752	7.11988	0.974954	1	14	55625400	55637895	-1	Ipo4	importin 4 [Source:MGI Symbol;Acc:MGI:1923001]	145.204	137.949	144.459	145.321	126.865	156.664	142.537	142.95	-0.00116849	0.19479	-0.109599	-0.0751124	0.120846	-0.183543	-0.00858801	0.18737	-0.117018
ENSMUSG00000002320	1.073	0.101654	6.88112	0.428258	1	14	55635965	55643806	-1	Tm9sf1	transmembrane 9 superfamily member 1 [Source:MGI Symbol;Acc:MGI:1921390]	115.09	124.423	126.685	118.907	110.059	112.295	122.066	113.754	-0.0470698	0.0644801	0.0354638	0.0654264	0.176976	0.14796	0.0914118	0.202962	0.173945
ENSMUSG00000002325	1.05726	0.0803316	7.17024	0.530468	1	14	55603571	55610030	1	Irf9	interferon regulatory factor 9 [Source:MGI Symbol;Acc:MGI:107587]	143.927	156.004	148.566	141.839	141.992	140.346	149.499	141.393	0.0210828	0.0195297	0.036348	0.137328	0.135775	0.152593	0.06685	0.0652969	0.0821152
ENSMUSG00000002326	-1.03943	-0.0557908	4.66809	0.677205	1	14	55672235	55678750	1	Gmpr2	guanosine monophosphate reductase 2 [Source:MGI Symbol;Acc:MGI:1917903]	24.9137	25.2141	24.6947	26.1154	25.0821	26.5732	24.9408	25.9236	-0.0679633	-0.00972023	-0.0930351	-0.0506711	0.00757202	-0.0757429	-0.0807012	-0.0224581	-0.105773
ENSMUSG00000002329	-1.01817	-0.0259805	4.8051	0.847385	1	14	55657879	55660508	-1	Mdp1	magnesium-dependent phosphatase 1 [Source:MGI Symbol;Acc:MGI:1915131]	26.5683	28.7935	29.5739	28.6453	28.3537	29.4688	28.3119	28.8226	-0.108595	-0.0938308	-0.149485	0.00744165	0.0222061	-0.0334476	0.0460224	0.0607869	0.00513322
ENSMUSG00000002332	1.02672	0.0380432	5.26961	0.77303	1	14	55739020	55745690	-1	Dhrs1	dehydrogenase/reductase (SDR family) member 1 [Source:MGI Symbol;Acc:MGI:1196314]	38.3633	39.5633	43.4148	42.5463	35.7357	39.9051	40.4471	39.3957	-0.149309	0.10236	-0.0568461	-0.104872	0.146797	-0.0124089	0.0291526	0.280822	0.121616
ENSMUSG00000002342	1.10774	0.147622	4.78969	0.265817	1	8	70172356	70183681	1	Tmem161a	transmembrane protein 161A [Source:MGI Symbol;Acc:MGI:2384577]	29.6411	29.6487	29.6734	27.666	25.138	27.5083	29.6544	26.7708	0.0994858	0.237729	0.107736	0.0998556	0.238099	0.108105	0.101058	0.239301	0.109307
ENSMUSG00000002343	1.00618	0.00888142	3.15299	0.972046	1	8	70220172	70234466	-1	Armc6	armadillo repeat containing 6 [Source:MGI Symbol;Acc:MGI:1924063]	10.164	7.57056	9.33518	10.1741	7.04648	9.77267	9.02326	8.99776	-0.00143351	0.528498	0.0566468	-0.426433	0.103498	-0.368352	-0.124155	0.405777	-0.0660744
ENSMUSG00000002345	-1.0879	-0.12155	4.3788	0.367281	1	8	70139499	70167488	1	Borcs8	BLOC-1 related complex subunit 8 [Source:MGI Symbol;Acc:MGI:1919618]	19.548	20.4627	19.4172	22.0621	18.8186	23.7681	19.8093	21.5496	-0.174546	0.0548656	-0.282004	-0.108573	0.120839	-0.216031	-0.184235	0.0451773	-0.291693
ENSMUSG00000002346	1.06289	0.0879927	2.46339	0.568336	1	8	70184340	70212305	-1	Slc25a42	solute carrier family 25, member 42 [Source:MGI Symbol;Acc:MGI:1920345]	5.36566	5.67	5.92473	5.76715	4.19433	6.00235	5.65346	5.32128	-0.104104	0.355315	-0.161772	-0.0245098	0.434909	-0.0821781	0.0388903	0.498309	-0.018778
ENSMUSG00000002365	-1.0508	-0.0714885	7.26129	0.576754	1	17	5841328	5931033	1	Snx9	sorting nexin 9 [Source:MGI Symbol;Acc:MGI:1913866]	145.676	147.673	146.898	149.184	150.017	163.421	146.749	154.207	-0.0343277	-0.0423606	-0.165824	-0.0146847	-0.0227176	-0.146181	-0.0222761	-0.030309	-0.153772
ENSMUSG00000002372	-1.03485	-0.0494239	6.53209	0.701112	1	17	56673225	56711769	1	Ranbp3	RAN binding protein 3 [Source:MGI Symbol;Acc:MGI:1919060]	92.8944	91.2585	92.5054	98.5857	83.4951	104.242	92.2195	95.4409	-0.0857855	0.1539	-0.16627	-0.111418	0.128267	-0.191903	-0.0918394	0.147846	-0.172324
ENSMUSG00000002379	-1.05869	-0.0822826	5.10183	0.534063	1	17	56717762	56724248	1	Ndufa11	NADH dehydrogenase (ubiquinone) 1 alpha subcomplex 11 [Source:MGI Symbol;Acc:MGI:1917125]	29.4284	35.9206	34.9509	39.9892	25.5015	40.6591	33.4333	35.3833	-0.442402	0.206625	-0.466371	-0.154801	0.494226	-0.178769	-0.19428	0.454747	-0.218249
ENSMUSG00000002393	1.04481	0.0632406	4.1001	0.644356	1	8	71374123	71381960	-1	Nr2f6	nuclear receptor subfamily 2, group F, member 6 [Source:MGI Symbol;Acc:MGI:1352453]	16.8297	17.01	18.6704	17.1382	17.6721	15.4432	17.5034	16.7512	-0.0262065	-0.0704625	0.124037	-0.0108349	-0.0550909	0.139409	0.123532	0.0792758	0.273776
ENSMUSG00000002395	-1.08949	-0.123654	4.56765	0.356801	1	8	71366848	71369732	1	Use1	unconventional SNARE in the ER 1 homolog (S. cerevisiae) [Source:MGI Symbol;Acc:MGI:1914273]	21.0135	26.101	24.3213	27.9652	23.4323	26.3621	23.8119	25.9199	-0.412317	-0.157182	-0.327146	-0.0995291	0.155606	-0.0143582	-0.201417	0.053718	-0.116246
ENSMUSG00000002396	1.03223	0.0457591	0.928441	0.817682	1	8	71371298	71379361	1	Ocel1	occludin/ELL domain containing 1 [Source:MGI Symbol;Acc:MGI:1924340]	1.65461	1.93224	1.81725	1.16975	1.92939	2.14154	1.80136	1.7469	0.500286	-0.221657	-0.37216	0.724067	0.00212446	-0.148379	0.635553	-0.0863902	-0.236894
ENSMUSG00000002409	1.00929	0.0133386	2.8003	0.934983	1	7	28179469	28187294	1	Dyrk1b	dual-specificity tyrosine-(Y)-phosphorylation regulated kinase 1b [Source:MGI Symbol;Acc:MGI:1330302]	5.57839	6.49358	7.69219	6.8825	6.26353	6.42463	6.58805	6.52355	-0.303082	-0.167127	-0.203763	-0.0839186	0.0520368	0.0154012	0.160462	0.296418	0.259782
ENSMUSG00000002413	-1.01869	-0.0267198	5.91825	0.838052	1	6	39603237	39725463	-1	Braf	Braf transforming gene [Source:MGI Symbol;Acc:MGI:88190]	57.8877	58.5689	61.0645	57.2091	69.2065	54.4133	59.1737	60.2763	0.017012	-0.257651	0.0892974	0.0338913	-0.240772	0.106177	0.0940914	-0.180572	0.166377
ENSMUSG00000002416	-1.0524	-0.0736853	3.52522	0.601247	1	6	39592574	39603382	1	Ndufb2	NADH dehydrogenase (ubiquinone) 1 beta subcomplex, 2 [Source:MGI Symbol;Acc:MGI:1915448]	11.2277	11.4034	11.4014	12.8129	9.56307	13.4525	11.3441	11.9428	-0.190531	0.231516	-0.260812	-0.168135	0.253912	-0.238416	-0.168386	0.253661	-0.238667
ENSMUSG00000002428	1.0745	0.103661	5.46023	0.425953	1	3	20057811	20118490	1	Hltf	helicase-like transcription factor [Source:MGI Symbol;Acc:MGI:1196437]	42.2398	48.0525	45.6055	42.5191	50.2201	33.6614	45.2992	42.1336	-0.00951004	-0.249663	0.327507	0.176498	-0.0636547	0.513515	0.101095	-0.139058	0.438111
ENSMUSG00000002455	-1.00144	-0.00206909	6.71885	0.987714	1	2	181591868	181655660	1	Prpf6	pre-mRNA splicing factor 6 [Source:MGI Symbol;Acc:MGI:1922946]	104.76	105.228	108.587	104.135	103.852	111.059	106.192	106.348	0.00863516	0.0125689	-0.0842278	0.0150561	0.0189898	-0.0778069	0.060392	0.0643257	-0.032471
ENSMUSG00000002458	-1.01781	-0.02547	4.38657	0.850685	1	2	181688419	181693977	-1	Rgs19	regulator of G-protein signaling 19 [Source:MGI Symbol;Acc:MGI:1915153]	20.3044	20.6844	23.201	21.79	19.7134	23.8586	21.3966	21.7873	-0.101876	0.0426197	-0.232716	-0.0751244	0.0693713	-0.205964	0.0905207	0.235016	-0.0403189
ENSMUSG00000002475	1.07806	0.108435	0.936724	0.608901	1	18	10644411	10706771	-1	Abhd3	abhydrolase domain containing 3 [Source:MGI Symbol;Acc:MGI:2147183]	1.79643	1.80553	2.29023	1.90425	1.70569	1.87008	1.96407	1.82667	-0.0840874	0.074775	-0.0579649	-0.0767981	0.0820643	-0.0506756	0.266272	0.425134	0.292395
ENSMUSG00000002477	-1.06425	-0.0898341	6.24621	0.486244	1	18	10617796	10628230	1	Snrpd1	small nuclear ribonucleoprotein D1 [Source:MGI Symbol;Acc:MGI:98344]	80.4612	75.0087	70.4246	77.6389	76.952	85.8427	75.2982	80.1445	0.0515138	0.0643354	-0.0934007	-0.0497214	-0.0368998	-0.194636	-0.1407	-0.127879	-0.285615
ENSMUSG00000002486	1.01547	0.0221494	3.59284	0.882289	1	5	114707760	114722327	1	Tchp	trichoplein, keratin filament binding [Source:MGI Symbol;Acc:MGI:1925082]	13.3787	12.322	11.2271	11.5887	11.3806	13.4223	12.3093	12.1306	0.207217	0.233358	-0.00469936	0.0885116	0.114653	-0.123404	-0.045733	-0.0195916	-0.257649
ENSMUSG00000002489	1.03567	0.0505626	6.10535	0.69584	1	16	89787111	89980080	-1	Tiam1	T cell lymphoma invasion and metastasis 1 [Source:MGI Symbol;Acc:MGI:103306]	61.7642	67.2164	69.404	69.5051	66.3823	55.6198	66.1282	63.8357	-0.170348	-0.104028	0.151172	-0.0483038	0.0180163	0.273217	-0.00209969	0.0642204	0.319421
ENSMUSG00000002496	1.02095	0.0299179	6.77541	0.816594	1	17	24595937	24632629	-1	Tsc2	tuberous sclerosis 2 [Source:MGI Symbol;Acc:MGI:102548]	107.36	108.078	111.624	109.549	97.644	113.17	109.021	106.788	-0.0291097	0.136859	-0.0760282	-0.0194929	0.146476	-0.0664115	0.0270738	0.193042	-0.0198447
ENSMUSG00000002504	1.04162	0.0588259	4.78292	0.658022	1	17	24639282	24650305	-1	Slc9a3r2	solute carrier family 9 (sodium/hydrogen exchanger), member 3 regulator 2 [Source:MGI Symbol;Acc:MGI:1890662]	26.1664	28.1916	29.5988	29.1078	26.3124	25.1556	27.9856	26.8586	-0.153687	-0.00802661	0.0568399	-0.0461387	0.0995222	0.164389	0.024131	0.169792	0.234658
ENSMUSG00000002524	1.00891	0.0128018	6.41001	0.921709	1	15	76070184	76080946	-1	Puf60	poly-U binding splicing factor 60 [Source:MGI Symbol;Acc:MGI:1915209]	85.6378	88.0909	87.5765	88.1667	79.8601	90.9703	87.1017	86.3323	-0.0419861	0.100774	-0.0871477	-0.00124039	0.141519	-0.046402	-0.0096905	0.133069	-0.0548521
ENSMUSG00000002546	-1.00949	-0.0136322	6.67614	0.916146	1	2	32287384	32307921	1	Golga2	golgi autoantigen, golgin subfamily a, 2 [Source:MGI Symbol;Acc:MGI:2139395]	99.7965	103.01	107.915	103.618	102.649	107.409	103.574	104.559	-0.0542176	-0.0406617	-0.106052	-0.00849015	0.00506572	-0.0603245	0.0586127	0.0721686	0.00677841
ENSMUSG00000002550	-1.02246	-0.0320443	5.22308	0.807746	1	2	32255002	32260159	-1	Uck1	uridine-cytidine kinase 1 [Source:MGI Symbol;Acc:MGI:98904]	37.3941	37.0609	38.0129	40.2885	31.9888	42.7404	37.4893	38.3392	-0.107554	0.225247	-0.192786	-0.120468	0.212333	-0.205701	-0.0838785	0.248923	-0.169111
ENSMUSG00000002565	-1.11544	-0.157608	1.3724	0.367253	1	12	40059769	40134228	-1	Scin	scinderin [Source:MGI Symbol;Acc:MGI:1306794]	2.31645	2.5024	3.43535	3.23722	2.82418	3.16707	2.7514	3.07616	-0.48284	-0.285917	-0.451232	-0.371442	-0.174519	-0.339834	0.0856997	0.282623	0.117308
ENSMUSG00000002580	-1.0517	-0.0727222	4.34913	0.592658	1	11	98437708	98438991	-1	Mien1	migration and invasion enhancer 1 [Source:MGI Symbol;Acc:MGI:1913678]	18.8862	21.8564	20.4627	22.1437	19.266	22.9235	20.4018	21.4444	-0.229565	-0.0287237	-0.2795	-0.0188375	0.182004	-0.0687724	-0.113897	0.0869441	-0.163832
ENSMUSG00000002602	1.02105	0.0300561	10.5609	0.813063	1	7	25757273	25788705	-1	Axl	AXL receptor tyrosine kinase [Source:MGI Symbol;Acc:MGI:1347244]	1559.82	1502.42	1528.75	1478.76	1481.97	1535.64	1530.33	1498.79	0.0769966	0.0738671	0.0225456	0.0229063	0.0197767	-0.0315448	0.0479712	0.0448417	-0.00647979
ENSMUSG00000002603	1.08851	0.122353	4.47314	0.357861	1	7	25687002	25705077	1	Tgfb1	transforming growth factor, beta 1 [Source:MGI Symbol;Acc:MGI:98725]	20.7772	26.2594	24.7942	24.864	20.7759	20.2692	23.9436	21.9697	-0.259063	8.57504e-05	0.0357059	0.0787728	0.337921	0.373542	-0.00405539	0.255093	0.290713
ENSMUSG00000002608	1.00862	0.0123798	5.41652	0.927126	1	7	25711106	25719088	-1	Ccdc97	coiled-coil domain containing 97 [Source:MGI Symbol;Acc:MGI:1196455]	42.3107	42.1607	43.3401	41.3222	39.0912	46.3297	42.6039	42.2477	0.0341058	0.11418	-0.130915	0.0289836	0.109058	-0.136037	0.0687874	0.148862	-0.0962332
ENSMUSG00000002617	1.09838	0.135382	3.64646	0.32759	1	17	23173869	23193252	-1	Zfp40	zinc finger protein 40 [Source:MGI Symbol;Acc:MGI:99185]	13.4732	13.4306	13.2186	11.2079	16.8892	8.38519	13.3742	12.1607	0.265586	-0.326002	0.684181	0.261015	-0.330573	0.67961	0.238061	-0.353527	0.656656
ENSMUSG00000002625	-1.03628	-0.0514169	4.97467	0.698787	1	17	32321425	32350581	-1	Akap8l	A kinase (PRKA) anchor protein 8-like [Source:MGI Symbol;Acc:MGI:1860606]	32.5012	32.7846	30.0717	34.4941	31.038	33.2693	31.7859	32.9338	-0.085855	0.0664567	-0.0336972	-0.0733291	0.0789827	-0.0211713	-0.197941	-0.0456295	-0.145783
ENSMUSG00000002635	-1.03366	-0.0477596	3.39739	0.742773	1	7	34184499	34196661	-1	Pdcd2l	programmed cell death 2-like [Source:MGI Symbol;Acc:MGI:1915329]	9.59673	10.9282	10.4305	10.5822	9.3953	12.0047	10.3185	10.6607	-0.141022	0.0306033	-0.322985	0.0464211	0.218047	-0.135541	-0.0208269	0.150799	-0.202789
ENSMUSG00000002658	-1.10531	-0.144451	6.67493	0.260642	1	17	57003405	57011288	-1	Gtf2f1	general transcription factor IIF, polypeptide 1 [Source:MGI Symbol;Acc:MGI:1923848]	108.708	96.5801	93.8248	105.659	104.746	120.258	99.7042	110.221	0.0410451	0.0535541	-0.145679	-0.129612	-0.117103	-0.316337	-0.171368	-0.158859	-0.358093
ENSMUSG00000002660	-1.08074	-0.112015	4.18735	0.409567	1	17	56990264	56996371	1	Clpp	caseinolytic mitochondrial matrix peptidase proteolytic subunit [Source:MGI Symbol;Acc:MGI:1858213]	17.5388	18.9739	17.5501	21.0283	15.1276	22.26	18.021	19.472	-0.261781	0.213375	-0.343898	-0.148318	0.326839	-0.230434	-0.260852	0.214304	-0.342969
ENSMUSG00000002661	1.05834	0.0818021	1.91351	0.631584	1	17	56997339	56999322	1	Alkbh7	alkB homolog 7 [Source:MGI Symbol;Acc:MGI:1913650]	3.82924	3.80112	4.50578	4.16214	3.04788	4.28308	4.04538	3.83104	-0.12027	0.32925	-0.161593	-0.130902	0.318618	-0.172226	0.114451	0.563971	0.0731276
ENSMUSG00000002679	1.0226	0.0322432	4.81608	0.810211	1	12	81573557	81595008	-1	Med6	mediator complex subunit 6 [Source:MGI Symbol;Acc:MGI:1917042]	29.3102	28.9519	27.8313	27.6116	27.6267	28.9561	28.6978	28.0648	0.0861285	0.085342	0.0175377	0.0683812	0.0675947	-0.000209537	0.0114335	0.010647	-0.0571573
ENSMUSG00000002688	1.10817	0.148177	3.06488	0.317375	1	12	50341231	50649098	-1	Prkd1	protein kinase D1 [Source:MGI Symbol;Acc:MGI:99879]	8.65124	7.31715	9.6837	7.56259	8.24885	7.38983	8.5507	7.73375	0.194027	0.0687135	0.227366	-0.0475971	-0.172911	-0.0142582	0.356678	0.231365	0.390017
ENSMUSG00000002718	1.06041	0.0846259	7.07039	0.509272	1	2	166906040	166946389	1	Cse1l	chromosome segregation 1-like (S. cerevisiae) [Source:MGI Symbol;Acc:MGI:1339951]	143.36	133.704	128.726	129.162	139.336	114.165	135.263	127.554	0.150456	0.0410779	0.328518	0.0498598	-0.0595182	0.227922	-0.00488359	-0.114262	0.173179
ENSMUSG00000002728	1.00002	3.12965e-05	5.89851	1	1	2	145902099	145916425	1	Naa20	N(alpha)-acetyltransferase 20, NatB catalytic subunit [Source:MGI Symbol;Acc:MGI:1915127]	64.7661	58.5056	56.8077	59.9838	56.9031	63.2207	60.0265	60.0359	0.110665	0.186732	0.0348411	-0.0359999	0.0400666	-0.111824	-0.0784868	-0.00242028	-0.154311
ENSMUSG00000002731	1.02399	0.0342068	4.18017	0.804173	1	2	76629898	76648015	-1	Prkra	protein kinase, interferon inducible double stranded RNA dependent activator [Source:MGI Symbol;Acc:MGI:1344375]	17.7516	18.3404	19.4919	18.9881	16.8053	18.4897	18.5279	18.0943	-0.097146	0.0790327	-0.0587702	-0.0500688	0.12611	-0.011693	0.0377783	0.213957	0.0761541
ENSMUSG00000002732	1.02434	0.0346945	5.72123	0.787791	1	2	76663044	76673116	-1	Fkbp7	FK506 binding protein 7 [Source:MGI Symbol;Acc:MGI:1336879]	44.4381	61.6732	61.2637	53.999	61.4609	47.8378	55.7916	54.4326	-0.281138	-0.467874	-0.106356	0.191709	0.00497307	0.366491	0.182099	-0.004637	0.356881
ENSMUSG00000002733	-1.01019	-0.0146222	6.29133	0.910784	1	2	76675281	76696828	1	Plekha3	pleckstrin homology domain-containing, family A (phosphoinositide binding specific) member 3 [Source:MGI Symbol;Acc:MGI:1932515]	78.7594	78.3981	74.2085	71.0013	85.9838	76.7336	77.122	77.9062	0.149607	-0.126613	0.0375937	0.142974	-0.133246	0.0309606	0.0637396	-0.21248	-0.0482734
ENSMUSG00000002741	-1.00967	-0.0138803	7.58416	0.913926	1	11	5955693	5967780	1	Ykt6	YKT6 v-SNARE homolog (S. cerevisiae) [Source:MGI Symbol;Acc:MGI:1927550]	190.635	191.83	198.13	205.305	192.771	188.124	193.531	195.4	-0.106961	-0.016082	0.0191262	-0.0979432	-0.00706452	0.0281436	-0.0513231	0.0395556	0.0747638
ENSMUSG00000002748	-1.087	-0.120349	8.20424	0.345219	1	5	135187264	135246129	1	Baz1b	bromodomain adjacent to zinc finger domain, 1B [Source:MGI Symbol;Acc:MGI:1353499]	292.346	277.862	282.794	295.485	320.139	311.609	284.334	309.078	-0.0154094	-0.131025	-0.0920638	-0.0887172	-0.204332	-0.165371	-0.0633339	-0.178949	-0.139988
ENSMUSG00000002763	1.04828	0.0680244	4.23653	0.616926	1	17	46711463	46725541	1	Pex6	peroxisomal biogenesis factor 6 [Source:MGI Symbol;Acc:MGI:2385054]	18.9807	19.4807	19.3425	19.5321	16.7214	18.8818	19.268	18.3784	-0.0413158	0.182839	0.00754125	-0.00380255	0.220353	0.0450545	-0.0140762	0.210079	0.0347808
ENSMUSG00000002767	-1.01617	-0.0231485	4.41312	0.867424	1	17	46646229	46650139	1	Mrpl2	mitochondrial ribosomal protein L2 [Source:MGI Symbol;Acc:MGI:1351622]	21.2263	23.1868	21.3838	23.0958	19.8532	23.8887	21.9323	22.2792	-0.121781	0.0964812	-0.170481	0.00567398	0.223936	-0.0430261	-0.111113	0.107149	-0.159813
ENSMUSG00000002768	-1.05233	-0.0735856	6.05685	0.569494	1	17	46681137	46683105	1	Mea1	male enhanced antigen 1 [Source:MGI Symbol;Acc:MGI:96957]	66.8698	68.3251	65.421	70.838	57.7699	82.5248	66.872	70.3776	-0.0831692	0.211037	-0.303472	-0.0521084	0.242097	-0.272411	-0.114771	0.179435	-0.335074
ENSMUSG00000002771	-1.05525	-0.0775916	1.08447	0.647785	1	7	45831883	45878378	-1	Grin2d	glutamate receptor, ionotropic, NMDA2D (epsilon 4) [Source:MGI Symbol;Acc:MGI:95823]	1.86734	1.55212	2.38981	1.44179	2.32086	2.44317	1.93642	2.06861	0.373128	-0.313674	-0.387765	0.106384	-0.580418	-0.654509	0.729035	0.0422328	-0.0318586
ENSMUSG00000002778	1.04502	0.0635312	7.27513	0.619727	1	7	45872772	45883732	1	Kdelr1	KDEL (Lys-Asp-Glu-Leu) endoplasmic reticulum protein retention receptor 1 [Source:MGI Symbol;Acc:MGI:1915387]	152.059	163.543	163.826	153.156	154.212	151.386	159.809	152.918	-0.0103751	-0.0202844	0.00639567	0.0946696	0.0847603	0.11144	0.0971649	0.0872557	0.113936
ENSMUSG00000002781	-1.01113	-0.0159656	2.92755	0.932079	1	7	45896941	45917413	1	Tmem143	transmembrane protein 143 [Source:MGI Symbol;Acc:MGI:1917459]	7.75302	7.44386	6.99516	7.86183	7.21425	7.35967	7.39735	7.47858	-0.0201056	0.10391	0.0751186	-0.0788139	0.0452013	0.0164103	-0.168506	-0.0444912	-0.0732822
ENSMUSG00000002797	-1.11219	-0.153405	4.19223	0.255437	1	6	54982580	54992950	-1	Ggct	gamma-glutamyl cyclotransferase [Source:MGI Symbol;Acc:MGI:95700]	18.1771	15.4579	17.6746	19.5049	17.8119	19.8168	17.1032	19.0446	-0.101721	0.029275	-0.124606	-0.335497	-0.204501	-0.358382	-0.142161	-0.0111646	-0.165045
ENSMUSG00000002803	1.02828	0.0402367	2.86285	0.790884	1	12	112976482	112978945	1	Btbd6	BTB (POZ) domain containing 6 [Source:MGI Symbol;Acc:MGI:3026623]	6.85481	7.2538	7.59262	7.20894	6.68297	7.20885	7.23374	7.03359	-0.0726714	0.0366271	-0.0726538	0.00895012	0.118249	0.00896768	0.0748099	0.184108	0.0748275
ENSMUSG00000002808	1.00847	0.0121736	5.56461	0.92624	1	13	19591706	19619927	-1	Epdr1	ependymin related protein 1 (zebrafish) [Source:MGI Symbol;Acc:MGI:2145369]	46.1163	48.6226	49.937	50.1905	49.7168	43.5246	48.2253	47.8106	-0.122139	-0.108457	0.0834464	-0.0457873	-0.0321051	0.159798	-0.00730617	0.00637601	0.198279
ENSMUSG00000002812	1.00824	0.011839	7.42341	0.926715	1	11	60714123	60727263	-1	Flii	flightless I actin binding protein [Source:MGI Symbol;Acc:MGI:1342286]	175.814	177.449	179.31	177.068	168.193	182.966	177.524	176.076	-0.0102531	0.0639348	-0.0575268	0.00310095	0.0772888	-0.0441728	0.018155	0.0923429	-0.0291187
ENSMUSG00000002814	1.03106	0.0441329	3.97782	0.747692	1	11	60740058	60777365	-1	Top3a	topoisomerase (DNA) III alpha [Source:MGI Symbol;Acc:MGI:1197527]	15.3879	16.8833	15.6831	15.8053	15.4072	15.2623	15.9848	15.4916	-0.0386125	-0.00180998	0.0118241	0.0951923	0.131995	0.145629	-0.0111933	0.0256092	0.0392433
ENSMUSG00000002820	-1.10018	-0.137736	2.89404	0.344301	1	9	21265293	21277772	1	Atg4d	autophagy related 4D, cysteine peptidase [Source:MGI Symbol;Acc:MGI:2444308]	8.06031	6.65196	5.99941	7.23614	6.68297	8.92812	6.90389	7.61574	0.155614	0.270346	-0.147522	-0.121442	-0.00670971	-0.424577	-0.2704	-0.155668	-0.573535
ENSMUSG00000002825	-1.01186	-0.0170097	3.67728	0.90412	1	9	21411837	21420274	1	Qtrt1	queuine tRNA-ribosyltransferase 1 [Source:MGI Symbol;Acc:MGI:1931441]	13.166	12.2586	12.0984	13.2481	10.0384	14.7193	12.5077	12.6686	-0.00897634	0.391278	-0.1609	-0.111993	0.288261	-0.263917	-0.130972	0.269282	-0.282896
ENSMUSG00000002831	-1.11747	-0.160231	0.0632178	0.575851	1	17	56100591	56109803	-1	Plin4	perilipin 4 [Source:MGI Symbol;Acc:MGI:1929709]	0.803667	1.29872	0.84639	1.14255	1.23034	0.844552	0.982924	1.07248	-0.507586	-0.614384	-0.0715882	0.184829	0.078032	0.620828	-0.432862	-0.539659	0.00313677
ENSMUSG00000002833	-1.00709	-0.0101874	6.04211	0.938303	1	17	56079657	56100596	1	Hdgfrp2	hepatoma-derived growth factor, related protein 2 [Source:MGI Symbol;Acc:MGI:1194492]	66.7516	66.4562	64.475	68.5529	61.0695	69.4644	65.8943	66.3623	-0.0384155	0.128352	-0.0574704	-0.0448142	0.121953	-0.063869	-0.0884786	0.078289	-0.107533
ENSMUSG00000002835	-1.10017	-0.137727	5.78294	0.287895	1	17	56040416	56068026	1	Chaf1a	chromatin assembly factor 1, subunit A (p150) [Source:MGI Symbol;Acc:MGI:1351331]	60.5587	50.8083	47.9206	56.5834	51.9817	66.7497	53.0959	58.4383	0.0979551	0.220329	-0.140429	-0.155315	-0.0329411	-0.393699	-0.239732	-0.117359	-0.478116
ENSMUSG00000002844	1.06119	0.0856789	5.66937	0.509947	1	16	38445399	38452689	-1	Adprh	ADP-ribosylarginine hydrolase [Source:MGI Symbol;Acc:MGI:1098234]	50.0637	54.9262	54.5922	53.8086	46.8647	49.6777	53.194	50.117	-0.104072	0.0952652	0.011166	0.0296564	0.228993	0.144894	0.0208564	0.220193	0.136094
ENSMUSG00000002845	1.04168	0.0589157	6.0166	0.649405	1	16	38558698	38592162	1	Tmem39a	transmembrane protein 39a [Source:MGI Symbol;Acc:MGI:1915096]	64.7425	68.4518	67.0889	64.7444	61.1254	66.3878	66.761	64.0859	-4.42031e-05	0.0829407	-0.036206	0.0803324	0.163317	0.0441706	0.0513167	0.134302	0.015155
ENSMUSG00000002846	-1.12952	-0.17571	4.78145	0.184212	1	16	38498347	38522663	-1	Timmdc1	translocase of inner mitochondrial membrane domain containing 1 [Source:MGI Symbol;Acc:MGI:1922139]	26.8992	25.3408	27.2338	29.0534	29.4442	31.3087	26.4913	29.9354	-0.111143	-0.13042	-0.219002	-0.197245	-0.216522	-0.305104	-0.0933059	-0.112583	-0.201165
ENSMUSG00000002847	-1.07948	-0.110339	5.35391	0.400236	1	16	38396119	38433145	-1	Pla1a	phospholipase A1 member A [Source:MGI Symbol;Acc:MGI:1934677]	36.3541	45.6451	43.614	46.1372	43.0059	46.39	41.8711	45.1777	-0.343813	-0.242415	-0.351696	-0.0154709	0.0859264	-0.0233545	-0.0811404	0.020257	-0.0890239
ENSMUSG00000002870	-1.02537	-0.0361402	6.54984	0.778649	1	6	88883474	88898780	-1	Mcm2	minichromosome maintenance complex component 2 [Source:MGI Symbol;Acc:MGI:105380]	102.94	89.6747	87.9997	101.986	79.7762	106.021	93.5382	95.9279	0.013435	0.367778	-0.042548	-0.185599	0.168744	-0.241582	-0.212803	0.14154	-0.268786
ENSMUSG00000002871	1.06026	0.0844192	4.05076	0.538474	1	6	88902251	88912238	1	Tpra1	transmembrane protein, adipocyte asscociated 1 [Source:MGI Symbol;Acc:MGI:1345190]	16.4515	16.915	16.5544	17.1654	13.1143	16.8005	16.6403	15.6934	-0.0612846	0.327084	-0.0302861	-0.0212054	0.367163	0.00979312	-0.0522926	0.336076	-0.0212941
ENSMUSG00000002881	1.05745	0.0805834	6.76961	0.530182	1	1	52457294	52500679	-1	Nab1	Ngfi-A binding protein 1 [Source:MGI Symbol;Acc:MGI:107564]	110.906	114.92	116.603	105.359	127.312	91.1211	114.143	107.931	0.0740196	-0.19903	0.283481	0.125318	-0.147731	0.334779	0.146283	-0.126767	0.355744
ENSMUSG00000002885	1.0305	0.0433426	6.61688	0.736919	1	8	83723251	83741326	-1	Adgre5	adhesion G protein-coupled receptor E5 [Source:MGI Symbol;Acc:MGI:1347095]	97.0546	97.9738	107.043	96.8446	93.3938	102.915	100.691	97.7177	0.00312449	0.0554703	-0.0845801	0.0167245	0.0690703	-0.0709801	0.144452	0.196798	0.0567479
ENSMUSG00000002897	-1.03895	-0.0551326	6.20267	0.668762	1	6	120463247	120487559	1	Il17ra	interleukin 17 receptor A [Source:MGI Symbol;Acc:MGI:107399]	82.9195	70.4474	75.2042	82.2363	74.1278	81.1675	76.1904	79.1772	0.0119359	0.161697	0.0308103	-0.223229	-0.0734683	-0.204355	-0.128962	0.0207992	-0.110087
ENSMUSG00000002900	-1.02754	-0.0391881	9.60766	0.757987	1	12	31265234	31329644	1	Lamb1	laminin B1 [Source:MGI Symbol;Acc:MGI:96743]	742.399	721.009	790.205	805.497	733.113	777.078	751.204	771.896	-0.117684	0.0181592	-0.0658646	-0.159862	-0.0240187	-0.108043	-0.027653	0.108191	0.0241667
ENSMUSG00000002910	-1.28236	-0.358797	0.3334	0.12776	1	8	70835129	70839720	-1	Arrdc2	arrestin domain containing 2 [Source:MGI Symbol;Acc:MGI:1918057]	0.921853	1.33039	0.896178	1.16975	1.482	1.32715	1.04947	1.3263	-0.343594	-0.684933	-0.525725	0.185648	-0.155691	0.00351651	-0.384347	-0.725686	-0.566478
ENSMUSG00000002948	-1.02469	-0.0351938	5.78707	0.786506	1	8	4238740	4247897	1	Map2k7	mitogen-activated protein kinase kinase 7 [Source:MGI Symbol;Acc:MGI:1346871]	57.3204	52.9623	55.4883	57.6715	53.3798	58.8472	55.257	56.6328	-0.00881141	0.102752	-0.0379251	-0.122895	-0.0113307	-0.152008	-0.0556746	0.0558892	-0.0847883
ENSMUSG00000002949	-1.06233	-0.087226	5.17314	0.507325	1	8	4259731	4275913	-1	Timm44	translocase of inner mitochondrial membrane 44 [Source:MGI Symbol;Acc:MGI:1343262]	35.5977	35.8572	33.2581	34.9838	35.484	40.7798	34.9044	37.0825	0.0250992	0.0046145	-0.196069	0.0355782	0.0150935	-0.18559	-0.0729776	-0.0934623	-0.294146
ENSMUSG00000002957	1.00849	0.012191	7.61813	0.9244	1	7	141562173	141633011	1	Ap2a2	adaptor-related protein complex 2, alpha 2 subunit [Source:MGI Symbol;Acc:MGI:101920]	195.811	193.92	205.499	213.058	183.041	194.126	198.41	196.742	-0.121785	0.0972987	0.0124672	-0.135783	0.083301	-0.00153058	-0.0521195	0.166964	0.0821327
ENSMUSG00000002963	1.07971	0.110649	4.313	0.413704	1	7	44857139	44862992	1	Pnkp	polynucleotide kinase 3'- phosphatase [Source:MGI Symbol;Acc:MGI:1891698]	20.5881	21.0329	21.4585	20.0762	15.6868	22.6822	21.0265	19.4818	0.03632	0.392257	-0.139756	0.0671573	0.423094	-0.108919	0.0960601	0.451997	-0.0800159
ENSMUSG00000002968	1.03826	0.0541726	4.39142	0.691024	1	7	44876765	44892712	-1	Med25	mediator complex subunit 25 [Source:MGI Symbol;Acc:MGI:1922863]	20.8008	20.3993	22.2053	22.4157	16.7773	21.898	21.1351	20.3637	-0.107873	0.310126	-0.0741621	-0.135989	0.28201	-0.102278	-0.0136076	0.404391	0.020103
ENSMUSG00000002980	1.02231	0.0318284	3.25984	0.825236	1	7	19756131	19771016	-1	Bcam	basal cell adhesion molecule [Source:MGI Symbol;Acc:MGI:1929940]	8.91125	10.4531	10.9533	10.5822	9.03179	10.014	10.1059	9.87598	-0.247938	-0.0193848	-0.168315	-0.0177092	0.210843	0.0619135	0.0497264	0.278279	0.129349
ENSMUSG00000002981	1.06805	0.094976	7.21119	0.458525	1	7	19631571	19665033	-1	Clptm1	cleft lip and palate associated transmembrane protein 1 [Source:MGI Symbol;Acc:MGI:1927155]	149.908	151.285	153.744	146.546	130.108	149.305	151.645	141.986	0.0327239	0.204361	0.00581328	0.0459157	0.217553	0.019005	0.0691837	0.240821	0.0422731
ENSMUSG00000002983	1.0188	0.0268738	2.77018	0.850444	1	7	19606217	19629438	-1	Relb	avian reticuloendotheliosis viral (v-rel) oncogene related B [Source:MGI Symbol;Acc:MGI:103289]	5.74385	8.42581	7.61751	7.42657	7.01851	6.8469	7.26239	7.09733	-0.370677	-0.289146	-0.253432	0.18212	0.26365	0.299365	0.0366237	0.118154	0.153868
ENSMUSG00000002984	-1.07553	-0.105046	5.82731	0.417048	1	7	19701313	19715438	-1	Tomm40	translocase of outer mitochondrial membrane 40 homolog (yeast) [Source:MGI Symbol;Acc:MGI:1858259]	61.0078	50.3015	52.6255	61.5888	46.9485	67.8658	54.6449	58.801	-0.0136757	0.377913	-0.153691	-0.292068	0.0995203	-0.432083	-0.226906	0.164683	-0.366921
ENSMUSG00000002985	1.2154	0.281435	1.79016	0.0762066	1	7	19696109	19699188	-1	Apoe	apolipoprotein E [Source:MGI Symbol;Acc:MGI:88057]	3.2383	5.79671	3.70918	3.37324	4.27822	2.68447	4.24806	3.44531	-0.0588961	-0.401771	0.270603	0.781098	0.438224	1.1106	0.136965	-0.20591	0.466464
ENSMUSG00000002996	1.06124	0.0857563	6.34917	0.50501	1	12	31926254	31950535	-1	Hbp1	high mobility group box transcription factor 1 [Source:MGI Symbol;Acc:MGI:894659]	73.2282	92.2722	88.3233	79.2711	90.234	69.585	84.6079	79.6967	-0.114396	-0.301272	0.0736231	0.2191	0.0322237	0.407118	0.155998	-0.0308778	0.344017
ENSMUSG00000002997	1.16566	0.221144	6.74353	0.0849919	1	12	31958476	32061296	-1	Prkar2b	protein kinase, cAMP dependent regulatory, type II beta [Source:MGI Symbol;Acc:MGI:97760]	140.358	114.73	128.726	105.849	122.782	100.683	127.938	109.771	0.407104	0.193012	0.479297	0.11624	-0.0978514	0.188433	0.282295	0.0682035	0.354488
ENSMUSG00000003031	-1.03465	-0.0491495	5.68526	0.708069	1	6	134920401	134925513	1	Cdkn1b	cyclin-dependent kinase inhibitor 1B [Source:MGI Symbol;Acc:MGI:104565]	49.4728	53.8175	47.5223	42.0567	69.3463	44.5803	50.2709	51.9944	0.2343	-0.487183	0.15023	0.35574	-0.365743	0.27167	0.17627	-0.545213	0.0921997
ENSMUSG00000003032	-1.05734	-0.0804332	6.6733	0.531623	1	4	55527143	55532466	-1	Klf4	Kruppel-like factor 4 (gut) [Source:MGI Symbol;Acc:MGI:1342287]	106.864	97.7838	90.9371	103.02	105.166	104.362	98.5283	104.183	0.0528546	0.0231104	0.0341738	-0.0752551	-0.104999	-0.0939359	-0.179981	-0.209725	-0.198661
ENSMUSG00000003033	-1.00183	-0.00263595	5.42603	0.985448	1	8	72240018	72257385	1	Ap1m1	adaptor-related protein complex AP-1, mu subunit 1 [Source:MGI Symbol;Acc:MGI:102776]	44.178	45.5817	42.8174	43.9881	38.5878	50.2508	44.1924	44.2756	0.00621499	0.195183	-0.185818	0.0513418	0.24031	-0.140691	-0.0389181	0.15005	-0.230951
ENSMUSG00000003037	-1.05061	-0.0712219	6.69532	0.580011	1	8	72161200	72183904	1	Rab8a	RAB8A, member RAS oncogene family [Source:MGI Symbol;Acc:MGI:96960]	101.286	106.4	102.513	112.487	108.717	104.664	103.399	108.623	-0.151324	-0.102148	-0.0473365	-0.0802606	-0.0310848	0.0237268	-0.13395	-0.0847747	-0.029963
ENSMUSG00000003038	1.0247	0.0351999	7.11864	0.783753	1	4	133964738	133968650	-1	Hmgn2	high mobility group nucleosomal binding domain 2 [Source:MGI Symbol;Acc:MGI:96136]	147.26	146.28	130.269	133.95	144.648	134.977	141.27	137.859	0.13667	0.0258158	0.125648	0.127032	0.0161786	0.116011	-0.0401995	-0.151053	-0.0512206
ENSMUSG00000003039	1.03452	0.0489676	6.16913	0.705248	1	8	72219730	72224418	1	Fam32a	family with sequence similarity 32, member A [Source:MGI Symbol;Acc:MGI:1915172]	70.439	73.7734	75.1047	70.1852	70.7723	71.0328	73.1057	70.6634	0.00520937	-0.00681038	-0.0121108	0.0719345	0.0599147	0.0546143	0.0977367	0.0857169	0.0804165
ENSMUSG00000003062	-1.02738	-0.0389764	5.29729	0.767087	1	13	19357676	19395795	-1	Stard3nl	STARD3 N-terminal like [Source:MGI Symbol;Acc:MGI:1923455]	37.4178	36.7125	38.9588	40.7781	35.0087	40.4178	37.6964	38.7349	-0.124071	0.0960115	-0.111268	-0.151525	0.0685576	-0.138722	-0.0658447	0.154238	-0.0530415
ENSMUSG00000003068	-1.02709	-0.038562	6.12941	0.766636	1	10	80115803	80130682	1	Stk11	serine/threonine kinase 11 [Source:MGI Symbol;Acc:MGI:1341870]	66.0898	71.6828	70.8229	74.1569	66.7737	73.295	69.5318	71.4085	-0.166153	-0.0148537	-0.149288	-0.0489541	0.102345	-0.032089	-0.0663639	0.0849355	-0.0494988
ENSMUSG00000003072	1.00994	0.0142631	5.9061	0.914547	1	10	80138632	80145818	1	Atp5d	ATP synthase, H+ transporting, mitochondrial F1 complex, delta subunit [Source:MGI Symbol;Acc:MGI:1913293]	63.3715	58.0304	61.2886	64.7444	51.3386	64.8495	60.8968	60.3109	-0.0309222	0.30379	-0.0332615	-0.157947	0.176765	-0.160286	-0.0791378	0.255574	-0.081477
ENSMUSG00000003099	-1.1312	-0.177849	5.66678	0.171225	1	7	17004640	17027924	-1	Ppp5c	protein phosphatase 5, catalytic subunit [Source:MGI Symbol;Acc:MGI:102666]	50.0164	47.3873	46.1531	54.2711	46.4452	61.7126	47.8523	54.143	-0.117781	0.106872	-0.303163	-0.195684	0.0289697	-0.381065	-0.233754	-0.0091011	-0.419136
ENSMUSG00000003119	-1.0162	-0.0231781	6.52686	0.857496	1	11	98203059	98278504	1	Cdk12	cyclin-dependent kinase 12 [Source:MGI Symbol;Acc:MGI:1098802]	94.4309	89.0729	88.6967	88.3571	94.708	93.5643	90.7335	92.2098	0.095912	-0.00422769	0.0133007	0.0116398	-0.0884998	-0.0709714	0.00553389	-0.0946058	-0.0770773
ENSMUSG00000003123	-1.03371	-0.0478266	2.69331	0.762328	1	7	25379527	25398710	-1	Lipe	lipase, hormone sensitive [Source:MGI Symbol;Acc:MGI:96790]	5.64931	6.05011	7.39347	7.12733	6.01187	6.6056	6.36429	6.5816	-0.335288	-0.0897412	-0.225616	-0.236399	0.00914755	-0.126728	0.0528892	0.298436	0.162561
ENSMUSG00000003131	1.00602	0.00866039	7.76689	0.946152	1	9	45962859	46012690	-1	Pafah1b2	platelet-activating factor acetylhydrolase, isoform 1b, subunit 2 [Source:MGI Symbol;Acc:MGI:108415]	218.621	217.994	214.933	203.999	252.611	191.02	217.183	215.876	0.0998673	-0.208483	0.194712	0.0957246	-0.212625	0.19057	0.0753239	-0.233026	0.170169
ENSMUSG00000003134	-1.00323	-0.00464892	1.51522	1	1	1	39371492	39478755	-1	Tbc1d8	TBC1 domain family, member 8 [Source:MGI Symbol;Acc:MGI:1927225]	3.09648	2.91419	2.66364	3.0468	2.96399	2.68447	2.89144	2.89842	0.0233362	0.0630873	0.205993	-0.0641981	-0.0244469	0.118459	-0.193895	-0.154144	-0.0112376
ENSMUSG00000003135	1.02387	0.034037	4.7552	0.800389	1	1	39534992	39546889	1	Cnot11	CCR4-NOT transcription complex, subunit 11 [Source:MGI Symbol;Acc:MGI:106580]	26.7574	27.8115	26.7858	23.0958	28.0741	28.2925	27.1182	26.4874	0.212306	-0.0693005	-0.0804819	0.268051	-0.0135548	-0.0247363	0.213835	-0.0677715	-0.0789529
ENSMUSG00000003154	1.0845	0.117024	5.01592	0.376318	1	6	122819914	122845366	1	Foxj2	forkhead box J2 [Source:MGI Symbol;Acc:MGI:1926805]	33.4231	32.1511	34.4033	29.7335	30.8982	31.5802	33.3258	30.7373	0.168757	0.113321	0.0818246	0.112781	0.0573449	0.025849	0.210457	0.155021	0.123525
ENSMUSG00000003161	-1.00567	-0.00815812	6.78425	0.950211	1	5	8046078	8069379	1	Sri	sorcin [Source:MGI Symbol;Acc:MGI:98419]	111.426	113.875	113.64	119.614	111.653	109.581	112.981	113.616	-0.1023	-0.00293652	0.0240943	-0.0709329	0.0284303	0.0554611	-0.0739116	0.0254515	0.0524823
ENSMUSG00000003166	1.01485	0.0212645	6.95834	0.868634	1	16	17839482	17894145	-1	Dgcr2	DiGeorge syndrome critical region gene 2 [Source:MGI Symbol;Acc:MGI:892866]	117.926	128.351	130.817	128.89	117.945	124.722	125.698	123.852	-0.128259	-0.00022363	-0.0808327	-0.00604914	0.121987	0.0413775	0.0214056	0.149441	0.0688323
ENSMUSG00000003178	-1.20425	-0.268139	2.585	0.0775346	1	NA	NA	NA	NA	NA	NA	5.12929	5.44827	5.42685	6.06639	6.12372	7.0882	5.3348	6.42611	-0.242081	-0.255651	-0.466662	-0.15504	-0.168611	-0.379621	-0.160723	-0.174293	-0.385304
ENSMUSG00000003184	-1.06536	-0.0913441	4.4357	0.493562	1	7	44997648	45002848	1	Irf3	interferon regulatory factor 3 [Source:MGI Symbol;Acc:MGI:1859179]	22.7863	20.7161	21.4585	22.0349	19.9091	27.3273	21.6536	23.0904	0.0483793	0.194741	-0.262174	-0.0890364	0.057325	-0.39959	-0.038241	0.10812	-0.348794
ENSMUSG00000003190	-1.10689	-0.146515	2.48564	0.334512	1	7	44991222	44998712	-1	Bcl2l12	BCL2-like 12 (proline rich) [Source:MGI Symbol;Acc:MGI:1922986]	6.05114	4.84643	5.02855	6.22961	5.00523	6.45479	5.30871	5.89655	-0.0419357	0.273769	-0.0931631	-0.362221	-0.0465164	-0.413448	-0.308999	0.00670543	-0.360227
ENSMUSG00000003198	1.10367	0.142306	2.60476	0.339874	1	17	55892120	55898928	1	Zfp959	zinc finger protein 959 [Source:MGI Symbol;Acc:MGI:2385058]	6.0275	6.74699	6.47239	5.73995	7.29814	4.34341	6.41563	5.79383	0.0705224	-0.275968	0.472732	0.233205	-0.113285	0.635415	0.173262	-0.173228	0.575472
ENSMUSG00000003199	-1.1038	-0.142479	4.29378	0.291868	1	17	56005711	56016790	1	Mpnd	MPN domain containing [Source:MGI Symbol;Acc:MGI:1915297]	17.917	19.9242	19.1682	23.0142	16.6375	23.2553	19.0032	20.969	-0.361192	0.106893	-0.376229	-0.208003	0.260082	-0.22304	-0.263806	0.204279	-0.278844
ENSMUSG00000003200	1.05551	0.0779413	6.07528	0.547408	1	17	56016753	56036637	-1	Sh3gl1	SH3-domain GRB2-like 1 [Source:MGI Symbol;Acc:MGI:700010]	67.1535	69.2754	74.2583	66.7847	62.4955	70.3391	70.229	66.5398	0.00794391	0.103709	-0.066865	0.0528251	0.14859	-0.0219839	0.153034	0.248799	0.078225
ENSMUSG00000003208	-1.10533	-0.144481	2.64767	0.339408	1	17	55959187	55967949	1	Ccdc94	coiled-coil domain containing 94 [Source:MGI Symbol;Acc:MGI:1920136]	6.05114	6.24017	6.02431	6.9369	6.0678	7.23901	6.1052	6.74791	-0.197085	-0.00396644	-0.258587	-0.152707	0.0404122	-0.214208	-0.203497	-0.0103783	-0.264999
ENSMUSG00000003226	-1.01038	-0.0148998	8.19405	0.907302	1	10	58446920	58494356	1	Ranbp2	RAN binding protein 2 [Source:MGI Symbol;Acc:MGI:894323]	298.468	267.44	274.703	290.561	337.224	221.544	280.204	283.11	0.0387333	-0.176133	0.429981	-0.119624	-0.334491	0.271624	-0.0809671	-0.295834	0.310281
ENSMUSG00000003228	1.02172	0.0310045	7.03385	0.808924	1	19	60889749	61092553	1	Grk5	G protein-coupled receptor kinase 5 [Source:MGI Symbol;Acc:MGI:109161]	130.052	141.56	138.161	133.869	139.811	127.346	136.591	133.675	-0.0417273	-0.104387	0.0303335	0.0805954	0.0179355	0.152656	0.0455293	-0.0171306	0.11759
ENSMUSG00000003233	1.00464	0.00668384	5.15228	0.962442	1	16	20516982	20532520	1	Dvl3	dishevelled segment polarity protein 3 [Source:MGI Symbol;Acc:MGI:108100]	33.2576	34.3684	37.9133	34.9294	32.7997	37.3413	35.1798	35.0234	-0.0707548	0.0200041	-0.167085	-0.0233553	0.0674036	-0.119686	0.118264	0.209023	0.0219335
ENSMUSG00000003234	-1.0692	-0.0965271	6.01838	0.456015	1	16	20548577	20561379	1	Abcf3	ATP-binding cassette, sub-family F (GCN20), member 3 [Source:MGI Symbol;Acc:MGI:1351656]	64.2697	64.0805	62.4586	70.1035	63.7818	70.128	63.6029	68.0044	-0.125348	0.0109945	-0.125851	-0.129601	0.00674145	-0.130104	-0.166587	-0.0302442	-0.167089
ENSMUSG00000003235	-1.00852	-0.0122448	6.21079	0.92484	1	16	20498817	20509955	1	Eif2b5	eukaryotic translation initiation factor 2B, subunit 5 epsilon [Source:MGI Symbol;Acc:MGI:2446176]	75.0719	71.7778	74.2085	76.1427	66.3263	80.5039	73.6861	74.3243	-0.0204325	0.178692	-0.100784	-0.0851687	0.113955	-0.165521	-0.0371221	0.162002	-0.117474
ENSMUSG00000003269	-1.02564	-0.0365215	5.43231	0.781009	1	7	45806637	45814581	-1	Cyth2	cytohesin 2 [Source:MGI Symbol;Acc:MGI:1334255]	43.7289	43.1744	40.5271	43.5257	40.5172	46.6615	42.4768	43.5681	0.00672147	0.110052	-0.093644	-0.0116915	0.0916395	-0.112057	-0.102978	0.000352832	-0.203344
ENSMUSG00000003282	-1.03785	-0.053596	3.68844	0.706223	1	4	3900996	3938423	-1	Plag1	pleiomorphic adenoma gene 1 [Source:MGI Symbol;Acc:MGI:1891916]	11.4877	13.0188	13.119	11.6703	14.5963	12.7588	12.5419	13.0085	-0.0227532	-0.345509	-0.151397	0.157756	-0.165	0.0291114	0.168818	-0.153937	0.0401742
ENSMUSG00000003283	-1.13692	-0.185137	0.429795	0.495324	1	2	153108468	153151441	1	Hck	hemopoietic cell kinase [Source:MGI Symbol;Acc:MGI:96052]	0.850941	1.67883	1.07043	1.5506	1.28626	1.14618	1.20007	1.32768	-0.865697	-0.596052	-0.429699	0.114625	0.38427	0.550624	-0.534632	-0.264987	-0.0986339
ENSMUSG00000003299	-1.00687	-0.00987951	4.52378	0.943228	1	9	21002738	21008839	1	Mrpl4	mitochondrial ribosomal protein L4 [Source:MGI Symbol;Acc:MGI:2137210]	22.7154	23.0918	23.0517	24.2384	18.5389	26.5732	22.953	23.1168	-0.0936209	0.293112	-0.226302	-0.0699117	0.316822	-0.202593	-0.0724202	0.314313	-0.205101
ENSMUSG00000003308	1.05393	0.0757816	5.53194	0.560425	1	9	21229730	21239361	-1	Keap1	kelch-like ECH-associated protein 1 [Source:MGI Symbol;Acc:MGI:1858732]	46.589	51.1567	50.4598	50.517	46.4173	43.6452	49.4018	46.8598	-0.116778	0.00532933	0.0941668	0.0181552	0.140262	0.2291	-0.00163469	0.120473	0.20931
ENSMUSG00000003316	-1.01729	-0.0247278	8.07978	0.846632	1	8	111154421	111259216	-1	Glg1	golgi apparatus protein 1 [Source:MGI Symbol;Acc:MGI:104967]	245.875	261.042	285.009	277.395	279.063	249.143	263.975	268.533	-0.174016	-0.182666	-0.0190488	-0.0876586	-0.0963088	0.0673083	0.0390699	0.0304196	0.194037
ENSMUSG00000003344	1.0892	0.12327	3.68425	0.373921	1	10	80642617	80657071	-1	Btbd2	BTB (POZ) domain containing 2 [Source:MGI Symbol;Acc:MGI:1933831]	11.8895	13.8424	14.538	13.4113	11.4925	12.0349	13.4233	12.3129	-0.173761	0.0490048	-0.0175264	0.0456405	0.268406	0.201875	0.116374	0.33914	0.272608
ENSMUSG00000003345	-1.02461	-0.0350711	6.05382	0.787932	1	10	80622838	80640749	1	Csnk1g2	casein kinase 1, gamma 2 [Source:MGI Symbol;Acc:MGI:1920014]	61.126	66.2978	66.3918	71.5997	62.0761	64.8797	64.6052	66.1852	-0.228169	-0.0222526	-0.0859813	-0.110992	0.0949242	0.0311955	-0.108949	0.0969679	0.0332392
ENSMUSG00000003346	1.00553	0.0079533	4.29381	0.9574	1	10	80583654	80590341	-1	Abhd17a	abhydrolase domain containing 17A [Source:MGI Symbol;Acc:MGI:106388]	19.5244	18.9739	20.164	22.5789	16.1622	19.6057	19.5541	19.4489	-0.209701	0.272657	-0.00599401	-0.25096	0.231398	-0.047253	-0.163196	0.319162	0.040511
ENSMUSG00000003348	-1.0477	-0.0672234	5.4943	0.606033	1	10	80685253	80701977	-1	Mob3a	MOB kinase activator 3A [Source:MGI Symbol;Acc:MGI:3050117]	46.7072	42.3191	43.0414	45.0219	43.2016	50.1905	44.0226	46.138	0.0530198	0.112561	-0.103769	-0.0893163	-0.0297753	-0.246105	-0.0649003	-0.00535924	-0.221689
ENSMUSG00000003352	-1.00518	-0.00746005	6.00791	0.95516	1	15	98632220	98644530	1	Cacnb3	calcium channel, voltage-dependent, beta 3 subunit [Source:MGI Symbol;Acc:MGI:103307]	60.1332	62.9085	64.4999	64.3636	56.26	67.8959	62.5139	62.8398	-0.0980833	0.0960532	-0.175163	-0.0329896	0.161147	-0.11007	0.00305198	0.197188	-0.0740282
ENSMUSG00000003355	1.03457	0.0490323	4.34544	0.718981	1	15	98724373	98728198	-1	Fkbp11	FK506 binding protein 11 [Source:MGI Symbol;Acc:MGI:1913370]	19.9262	21.7931	23.0766	22.0893	15.0157	25.5477	21.5986	20.8842	-0.148679	0.408195	-0.358525	-0.0194763	0.537398	-0.229323	0.0630826	0.619957	-0.146764
ENSMUSG00000003360	-1.01935	-0.0276533	6.99798	0.829419	1	15	98645134	98662889	-1	Ddx23	DEAD (Asp-Glu-Ala-Asp) box polypeptide 23 [Source:MGI Symbol;Acc:MGI:1921601]	133.125	125.88	125.291	127.313	126.725	137.722	128.099	130.587	0.0644069	0.0710843	-0.0489796	-0.0163218	-0.00964441	-0.129708	-0.0230969	-0.0164195	-0.136483
ENSMUSG00000003363	1.06433	0.0899502	6.17707	0.485883	1	7	27532000	27553218	-1	Pld3	phospholipase D family, member 3 [Source:MGI Symbol;Acc:MGI:1333782]	65.5934	77.3844	79.1375	77.6933	63.0827	67.8658	74.0384	69.5473	-0.24424	0.0563055	-0.0491333	-0.00574723	0.294798	0.18936	0.0265701	0.327116	0.221677
ENSMUSG00000003378	-1.09982	-0.137271	1.96851	0.403536	1	7	25009849	25072346	-1	Grik5	glutamate receptor, ionotropic, kainate 5 (gamma 2) [Source:MGI Symbol;Acc:MGI:95818]	3.75832	3.76944	3.38556	3.69968	4.13841	4.16243	3.63778	4.00017	0.0226882	-0.138986	-0.147338	0.0269498	-0.134724	-0.143076	-0.128007	-0.289681	-0.298033
ENSMUSG00000003380	1.02921	0.0415333	4.65557	0.75678	1	7	24969752	24972754	-1	Rabac1	Rab acceptor 1 (prenylated) [Source:MGI Symbol;Acc:MGI:1201692]	23.1882	25.5625	30.4203	28.4005	23.1527	25.3667	26.3903	25.64	-0.292529	0.00220716	-0.129549	-0.151886	0.142849	0.0110936	0.0991156	0.393851	0.262095
ENSMUSG00000003382	-1.00629	-0.00904522	5.06111	0.945922	1	3	87525407	87540156	1	Etv3	ets variant 3 [Source:MGI Symbol;Acc:MGI:1350926]	36.0705	31.5176	32.4864	32.3722	35.7916	32.5756	33.3582	33.5798	0.156061	0.0111959	0.147028	-0.0385983	-0.183464	-0.0476322	0.00508127	-0.139784	-0.00395265
ENSMUSG00000003402	1.00552	0.00794107	7.61621	0.95076	1	9	22002806	22014222	1	Prkcsh	protein kinase C substrate 80K-H [Source:MGI Symbol;Acc:MGI:107877]	193.258	203.265	206.245	207.073	188.689	203.688	200.923	199.817	-0.0996123	0.03452	-0.0758294	-0.0267817	0.107351	-0.00299887	-0.00578083	0.128351	0.018002
ENSMUSG00000003420	1.00598	0.00859558	5.67647	0.947652	1	7	45092990	45103851	-1	Fcgrt	Fc receptor, IgG, alpha chain transporter [Source:MGI Symbol;Acc:MGI:103017]	45.8563	54.7995	56.3098	53.863	49.4372	52.694	52.3219	51.9981	-0.232176	-0.108477	-0.200519	0.0248665	0.148565	0.0565231	0.0640915	0.18779	0.0957482
ENSMUSG00000003421	-1.02762	-0.0393101	5.43655	0.764661	1	7	45062429	45078210	1	Nosip	nitric oxide synthase interacting protein [Source:MGI Symbol;Acc:MGI:1913644]	43.9889	44.3147	41.3237	46.5725	37.8049	48.8332	43.2091	44.4035	-0.0823365	0.218568	-0.150721	-0.0716919	0.229212	-0.140076	-0.172506	0.128398	-0.240891
ENSMUSG00000003423	1.07019	0.09787	3.94128	0.475702	1	7	45154303	45160065	1	Pih1d1	PIH1 domain containing 1 [Source:MGI Symbol;Acc:MGI:1916095]	15.1042	17.105	15.3844	15.8325	11.5764	17.0418	15.8645	14.8169	-0.0679351	0.38377	-0.174131	0.111535	0.56324	0.00533924	-0.0414193	0.410286	-0.147615
ENSMUSG00000003429	-1.04805	-0.0677043	8.85665	0.594873	1	7	45122379	45124439	-1	Rps11	ribosomal protein S11 [Source:MGI Symbol;Acc:MGI:1351329]	455.561	466.112	462.104	498.124	409.982	542.172	461.259	483.426	-0.128861	0.152084	-0.251107	-0.0958282	0.185117	-0.218074	-0.108288	0.172658	-0.230533
ENSMUSG00000003435	-1.04645	-0.0655032	8.19659	0.607558	1	7	28314891	28338746	-1	Supt5	suppressor of Ty 5 [Source:MGI Symbol;Acc:MGI:1202400]	283.576	284.355	286.727	303.102	281.523	309.739	284.886	298.122	-0.0960664	0.0104814	-0.127318	-0.092108	0.0144398	-0.12336	-0.080125	0.0264228	-0.111377
ENSMUSG00000003437	-1.04179	-0.0590708	5.80765	0.649524	1	7	28392951	28399388	1	Paf1	Paf1, RNA polymerase II complex component [Source:MGI Symbol;Acc:MGI:1923988]	56.7294	55.2112	55.339	57.9436	57.8818	58.455	55.7599	58.0935	-0.0305509	-0.0290116	-0.0432302	-0.069686	-0.0681466	-0.0823653	-0.0663524	-0.0648131	-0.0790318
ENSMUSG00000003438	1.03091	0.0439132	5.11694	0.742282	1	7	28305516	28312072	-1	Timm50	translocase of inner mitochondrial membrane 50 [Source:MGI Symbol;Acc:MGI:1913775]	36.8505	33.3548	34.1792	35.1742	27.403	38.7287	34.7948	33.7686	0.0671668	0.427352	-0.0717204	-0.076622	0.283563	-0.215509	-0.0413976	0.318788	-0.180285
ENSMUSG00000003444	-1.03024	-0.0429807	4.09904	0.754674	1	7	28386146	28392708	-1	Med29	mediator complex subunit 29 [Source:MGI Symbol;Acc:MGI:1914474]	17.5152	16.5349	15.932	19.0153	14.5124	17.9769	16.6607	17.1682	-0.118551	0.271324	-0.0375349	-0.201648	0.188227	-0.120632	-0.255228	0.134647	-0.174212
ENSMUSG00000003458	1.00664	0.00955237	7.68428	0.94073	1	1	172066013	172082795	-1	Ncstn	nicastrin [Source:MGI Symbol;Acc:MGI:1891700]	193.613	206.242	219.837	209.522	198.196	207.88	206.564	205.199	-0.113925	-0.0337542	-0.102579	-0.0227591	0.0574121	-0.0114129	0.0693367	0.149508	0.080683
ENSMUSG00000003464	1.06153	0.086145	6.73826	0.502327	1	1	172126755	172136493	1	Pex19	peroxisomal biogenesis factor 19 [Source:MGI Symbol;Acc:MGI:1334458]	98.1892	115.902	113.516	105.169	99.7971	103.608	109.202	102.858	-0.0990723	-0.0234339	-0.077505	0.140203	0.215841	0.16177	0.110185	0.185824	0.131753
ENSMUSG00000003500	-1.06809	-0.0950391	5.51843	0.465341	1	6	29200434	29216364	-1	Impdh1	inosine 5'-phosphate dehydrogenase 1 [Source:MGI Symbol;Acc:MGI:96567]	46.7309	42.6992	47.0742	50.6802	44.0405	51.1255	45.5014	48.6154	-0.117047	0.0855458	-0.129668	-0.247212	-0.0446198	-0.259834	-0.106485	0.0961073	-0.119107
ENSMUSG00000003518	1.0083	0.0119292	6.46879	0.926873	1	11	101971143	101987013	-1	Dusp3	dual specificity phosphatase 3 (vaccinia virus phosphatase VH1-related) [Source:MGI Symbol;Acc:MGI:1919599]	91.1926	92.2722	91.2608	92.0296	90.5416	89.8844	91.5752	90.8186	-0.0131819	0.010335	0.0208447	0.00379741	0.0273143	0.0378241	-0.0121034	0.0114135	0.0219233
ENSMUSG00000003526	-1.10638	-0.145853	-0.202992	0.593825	1	16	18060357	18090203	-1	Prodh	proline dehydrogenase [Source:MGI Symbol;Acc:MGI:97770]	0.827304	1.10866	0.746815	1.03373	0.782942	1.11601	0.894259	0.977564	-0.321376	0.0795129	-0.431866	0.10095	0.50184	-0.00953965	-0.469044	-0.0681546	-0.579534
ENSMUSG00000003527	1.03017	0.0428826	4.15399	0.759763	1	16	17900711	17911348	-1	Dgcr14	DiGeorge syndrome critical region gene 14 [Source:MGI Symbol;Acc:MGI:107854]	19.1462	16.7883	18.3467	17.5191	15.6868	19.5453	18.0937	17.5837	0.128129	0.287506	-0.029768	-0.0614734	0.0979032	-0.219371	0.066597	0.225974	-0.0913003
ENSMUSG00000003528	-1.00914	-0.0131275	5.27217	0.920665	1	16	17925211	17928219	-1	Slc25a1	solute carrier family 25 (mitochondrial carrier, citrate transporter), member 1 [Source:MGI Symbol;Acc:MGI:1345283]	38.1978	36.4591	41.8714	42.2199	34.058	41.3529	38.8428	39.2102	-0.144433	0.165498	-0.114497	-0.211646	0.0982853	-0.18171	-0.0119578	0.297973	0.017978
ENSMUSG00000003531	-1.04081	-0.0577003	3.83528	0.679866	1	16	18052860	18071632	1	Dgcr6	DiGeorge syndrome critical region gene 6 [Source:MGI Symbol;Acc:MGI:1202877]	13.5678	15.2362	14.0899	15.0708	12.6948	16.8609	14.2979	14.8755	-0.151567	0.0959432	-0.313494	0.0157458	0.263256	-0.146181	-0.0970909	0.150419	-0.259017
ENSMUSG00000003534	1.04959	0.0698208	7.27325	0.585329	1	17	35681567	35704621	-1	Ddr1	discoidin domain receptor family, member 1 [Source:MGI Symbol;Acc:MGI:99216]	164.208	173.078	180.157	176.116	151.248	165.623	172.481	164.329	-0.100999	0.118613	-0.0123749	-0.025105	0.194507	0.0635193	0.0327274	0.25234	0.121352
ENSMUSG00000003541	-1.10311	-0.141578	5.57165	0.276495	1	17	35821684	35822923	1	Ier3	immediate early response 3 [Source:MGI Symbol;Acc:MGI:104814]	50.2292	38.1062	42.0457	50.4082	48.794	44.7009	43.4604	47.9677	-0.00513194	0.0418206	0.168221	-0.403631	-0.356679	-0.230278	-0.261701	-0.214748	-0.0883473
ENSMUSG00000003545	-1.29796	-0.376246	0.699625	0.0628333	1	7	19302696	19310051	-1	Fosb	FBJ osteosarcoma oncogene B [Source:MGI Symbol;Acc:MGI:95575]	1.82007	1.33039	1.02065	2.12188	1.50996	1.80975	1.39037	1.81386	-0.221348	0.269484	0.00819987	-0.67349	-0.182659	-0.443942	-1.05586	-0.565026	-0.82631
ENSMUSG00000003546	1.01298	0.0185996	3.35222	0.894597	1	17	46630631	46645144	-1	Klc4	kinesin light chain 4 [Source:MGI Symbol;Acc:MGI:1922014]	9.05307	11.5934	11.0529	10.691	9.89862	10.6474	10.5664	10.4123	-0.239917	-0.12882	-0.23402	0.116909	0.228006	0.122806	0.0480234	0.15912	0.0539203
ENSMUSG00000003549	-1.01761	-0.0251877	5.03822	0.846931	1	7	19344778	19356524	1	Ercc1	excision repair cross-complementing rodent repair deficiency, complementation group 1 [Source:MGI Symbol;Acc:MGI:95412]	35.5977	30.4406	33.6067	34.0588	28.6613	38.7589	33.215	33.8263	0.0637553	0.312683	-0.122743	-0.162031	0.086896	-0.348529	-0.0192821	0.229645	-0.20578
ENSMUSG00000003559	1.09578	0.13196	3.98763	0.332891	1	19	46707443	46741095	1	As3mt	arsenic (+3 oxidation state) methyltransferase [Source:MGI Symbol;Acc:MGI:1929882]	14.6315	18.277	17.7493	14.2275	15.8266	16.137	16.8859	15.397	0.0403966	-0.113278	-0.141296	0.361355	0.207681	0.179663	0.319084	0.16541	0.137392
ENSMUSG00000003573	-1.05533	-0.0776972	5.89337	0.549314	1	8	70282827	70294361	1	Homer3	homer scaffolding protein 3 [Source:MGI Symbol;Acc:MGI:1347359]	58.6913	58.9807	58.1022	64.7716	54.4983	66.237	58.5914	61.8357	-0.142215	0.106935	-0.17449	-0.13512	0.114031	-0.167394	-0.15677	0.0923802	-0.189045
ENSMUSG00000003575	-1.00032	-0.000455668	4.0064	1	1	8	70382355	70439579	-1	Crtc1	CREB regulated transcription coactivator 1 [Source:MGI Symbol;Acc:MGI:2142523]	14.8678	16.2498	16.0316	15.7509	14.9598	16.4386	15.7164	15.7164	-0.0832352	-0.00889408	-0.144892	0.0449904	0.119332	-0.0166667	0.0254904	0.0998315	-0.0361667
ENSMUSG00000003581	1.05828	0.0817198	4.00865	0.549619	1	11	4135202	4141172	1	Rnf215	ring finger protein 215 [Source:MGI Symbol;Acc:MGI:1918923]	15.3642	17.6435	17.0523	17.0294	13.5337	16.7101	16.6867	15.7577	-0.148455	0.183017	-0.121142	0.0511096	0.382582	0.0784221	0.00193437	0.333407	0.0292469
ENSMUSG00000003604	-1.06981	-0.0973515	3.88549	0.475523	1	2	112492964	112634573	1	Aven	apoptosis, caspase activation inhibitor [Source:MGI Symbol;Acc:MGI:1921518]	16.097	13.0822	13.9903	15.1524	15.3513	15.7449	14.3898	15.4162	0.0872456	0.0684334	0.0319089	-0.211941	-0.230753	-0.267277	-0.115114	-0.133926	-0.170451
ENSMUSG00000003617	1.05479	0.0769571	6.65855	0.548516	1	3	19957054	20009145	1	Cp	ceruloplasmin [Source:MGI Symbol;Acc:MGI:88476]	87.7888	112.64	111.748	97.0895	118.755	80.0213	104.059	98.6221	-0.145278	-0.435885	0.133653	0.21433	-0.0762772	0.493261	0.202867	-0.0877403	0.481798
ENSMUSG00000003623	-1.01062	-0.0152351	5.95273	0.907883	1	5	8966033	8997324	-1	Crot	carnitine O-octanoyltransferase [Source:MGI Symbol;Acc:MGI:1921364]	60.8423	61.0396	61.8612	62.0241	66.8297	56.8263	61.2477	61.8933	-0.0277537	-0.135414	0.098517	-0.0230824	-0.130742	0.103188	-0.00379494	-0.111455	0.122476
ENSMUSG00000003644	-1.17886	-0.237392	1.33707	0.180901	1	4	133847290	133887797	-1	Rps6ka1	ribosomal protein S6 kinase polypeptide 1 [Source:MGI Symbol;Acc:MGI:104558]	2.12735	2.09062	2.48938	2.88358	2.15309	2.89561	2.23578	2.64409	-0.438799	-0.0173486	-0.444805	-0.463931	-0.0424808	-0.469938	-0.212071	0.209379	-0.218077
ENSMUSG00000003660	-1.00043	-0.00062034	7.90906	0.996336	1	2	127208386	127240451	1	Snrnp200	small nuclear ribonucleoprotein 200 (U5) [Source:MGI Symbol;Acc:MGI:2444401]	236.042	231.678	247.768	238.385	233.205	244.226	238.496	238.605	-0.0142498	0.0174443	-0.0491766	-0.0411693	-0.00947518	-0.0760961	0.0556996	0.0873938	0.0207728
ENSMUSG00000003662	-1.03554	-0.0503832	6.01875	0.697563	1	2	127240938	127247816	-1	Ciao1	cytosolic iron-sulfur protein assembly 1 [Source:MGI Symbol;Acc:MGI:1346998]	62.3787	62.6234	64.948	66.4039	60.8178	69.4945	63.3167	65.5721	-0.0902128	0.0365607	-0.155845	-0.0845645	0.042209	-0.150197	-0.0319823	0.0947913	-0.0976149
ENSMUSG00000003680	1.07089	0.098808	3.35208	0.484509	1	19	8772522	8786417	-1	Taf6l	TATA-box binding protein associated factor 6 like [Source:MGI Symbol;Acc:MGI:2444957]	10.2822	11.245	10.2811	10.691	9.619	9.35039	10.6028	9.8868	-0.0562458	0.0961916	0.137051	0.0728846	0.225322	0.266182	-0.0563945	0.0960429	0.136902
ENSMUSG00000003721	1.004	0.00575965	5.30697	0.965733	1	1	121304353	121332589	-1	Insig2	insulin induced gene 2 [Source:MGI Symbol;Acc:MGI:1920249]	37.3705	39.0248	38.7099	38.2754	42.5864	33.7519	38.3684	38.2046	-0.0345169	-0.188494	0.146931	0.0279748	-0.126002	0.209423	0.0162853	-0.137692	0.197733
ENSMUSG00000003731	1.00156	0.0022476	7.50651	0.986642	1	4	129643980	129672767	-1	Kpna6	karyopherin (importin) alpha 6 [Source:MGI Symbol;Acc:MGI:1100836]	186.498	173.204	178.638	178.727	179.182	179.618	179.447	179.176	0.0614	0.0577359	0.0542277	-0.0452852	-0.0489493	-0.0524576	-0.000720444	-0.00438453	-0.00789276
ENSMUSG00000003746	1.10025	0.137833	4.95667	0.294868	1	10	53904785	54076609	-1	Man1a	mannosidase 1, alpha [Source:MGI Symbol;Acc:MGI:104677]	30.7048	34.6219	33.3328	28.7814	36.994	23.8284	32.8865	29.8679	0.0933299	-0.268827	0.365781	0.266549	-0.0956081	0.539	0.211809	-0.150347	0.48426
ENSMUSG00000003752	1.04714	0.0664572	3.93529	0.631079	1	7	27207172	27228661	-1	Itpkc	inositol 1,4,5-trisphosphate 3-kinase C [Source:MGI Symbol;Acc:MGI:2442554]	16.5697	15.8697	16.8531	15.4788	15.6588	15.956	16.4308	15.6979	0.0982539	0.0815724	0.0544506	0.0359768	0.0192954	-0.00782642	0.12272	0.106039	0.078917
ENSMUSG00000003762	-1.00277	-0.00399494	3.66729	0.986846	1	7	27233023	27257950	1	Coq8b	coenzyme Q8B [Source:MGI Symbol;Acc:MGI:1924139]	12.2205	14.0325	13.2435	13.765	12.4991	13.3017	13.1655	13.1886	-0.171705	-0.0325258	-0.12231	0.0277642	0.166943	0.0771587	-0.0557181	0.0834611	-0.00632356
ENSMUSG00000003778	-1.00967	-0.0138822	6.2153	0.915207	1	18	34598615	34624601	-1	Brd8	bromodomain containing 8 [Source:MGI Symbol;Acc:MGI:1925906]	73.5592	74.6286	71.4453	69.8315	71.6112	80.3229	73.211	73.9219	0.0750269	0.0387196	-0.126906	0.0958511	0.0595439	-0.106082	0.0329605	-0.00334679	-0.168973
ENSMUSG00000003779	-1.02528	-0.0360125	7.03243	0.778351	1	18	34624624	34633265	1	Kif20a	kinesin family member 20A [Source:MGI Symbol;Acc:MGI:1201682]	144.849	117.518	118.096	132.155	110.814	147.193	126.821	130.054	0.132322	0.386408	-0.0231609	-0.169348	0.0847378	-0.324831	-0.162265	0.0918208	-0.317748
ENSMUSG00000003808	1.00202	0.00291289	5.66115	0.984101	1	8	84856989	84869257	1	Farsa	phenylalanyl-tRNA synthetase, alpha subunit [Source:MGI Symbol;Acc:MGI:1913840]	50.7019	50.9983	50.7336	52.4212	44.0684	55.6499	50.8113	50.7132	-0.0481108	0.202295	-0.134339	-0.039701	0.210705	-0.125929	-0.0472095	0.203196	-0.133438
ENSMUSG00000003809	-1.02325	-0.0331553	4.41307	0.807511	1	8	84886393	84893921	-1	Gcdh	glutaryl-Coenzyme A dehydrogenase [Source:MGI Symbol;Acc:MGI:104541]	21.439	20.8428	20.5872	22.1709	20.3285	21.8377	20.9563	21.4457	-0.0484294	0.076732	-0.0265832	-0.0891176	0.0360438	-0.0672714	-0.10692	0.0182417	-0.0850735
ENSMUSG00000003810	-1.03733	-0.0528756	7.03552	0.680104	1	4	116306762	116464183	-1	Mast2	microtubule associated serine/threonine kinase 2 [Source:MGI Symbol;Acc:MGI:894676]	129.272	119.894	119.615	129.462	114.254	138.868	122.927	127.528	-0.00211329	0.178173	-0.103307	-0.11077	0.0695157	-0.211964	-0.114129	0.066157	-0.215323
ENSMUSG00000003812	-1.04176	-0.0590223	3.60836	0.680946	1	8	84908560	84922915	1	Dnase2a	deoxyribonuclease II alpha [Source:MGI Symbol;Acc:MGI:1329019]	11.795	12.8921	11.4263	13.6562	11.9119	12.0047	12.0378	12.5243	-0.211379	-0.0142288	-0.0254247	-0.0830637	0.114087	0.102891	-0.2572	-0.0600495	-0.0712454
ENSMUSG00000003813	1.10841	0.148494	5.36653	0.256135	1	8	84834019	84840665	-1	Rad23a	RAD23 homolog A, nucleotide excision repair protein [Source:MGI Symbol;Acc:MGI:105126]	42.1925	44.5364	45.3565	39.0915	40.4613	39.6034	44.0285	39.7188	0.110132	0.0604439	0.0913611	0.188131	0.138443	0.16936	0.214456	0.164768	0.195685
ENSMUSG00000003814	-1.07846	-0.108974	10.2163	0.39123	1	8	84841850	84846934	-1	Calr	calreticulin [Source:MGI Symbol;Acc:MGI:88252]	1112.79	1141.19	1208.47	1203.43	1237.22	1293.49	1154.15	1244.71	-0.112965	-0.152909	-0.217083	-0.0766128	-0.116557	-0.18073	0.00602958	-0.0339146	-0.0980879
ENSMUSG00000003824	1.04729	0.0666608	1.7319	0.708814	1	8	84872111	84888221	1	Syce2	synaptonemal complex central element protein 2 [Source:MGI Symbol;Acc:MGI:1919096]	4.04197	3.64274	2.8379	3.48205	3.27158	3.28772	3.50754	3.34712	0.215121	0.305073	0.297972	0.0650849	0.155037	0.147936	-0.295117	-0.205165	-0.212265
ENSMUSG00000003847	-1.07491	-0.10422	8.72634	0.413282	1	8	107293470	107379517	1	Nfat5	nuclear factor of activated T cells 5 [Source:MGI Symbol;Acc:MGI:1859333]	383.349	366.46	381.597	387.542	472.673	355.948	377.135	405.388	-0.0156929	-0.302184	0.106991	-0.0806978	-0.367189	0.0419858	-0.0223003	-0.308791	0.100383
ENSMUSG00000003848	-1.07958	-0.11047	4.91455	0.403313	1	8	107412486	107425051	-1	Nob1	NIN1/RPN12 binding protein 1 homolog [Source:MGI Symbol;Acc:MGI:1914869]	30.7048	28.8252	27.0347	31.7465	27.347	34.3853	28.8549	31.1596	-0.048135	0.16708	-0.163328	-0.139271	0.0759437	-0.254465	-0.231787	-0.0165725	-0.346981
ENSMUSG00000003865	-1.04045	-0.0572078	5.59529	0.659948	1	7	45434844	45456619	1	Gys1	glycogen synthase 1, muscle [Source:MGI Symbol;Acc:MGI:101805]	49.4492	44.3464	48.9164	52.2852	42.8661	53.3877	47.5706	49.513	-0.0804574	0.20611	-0.110563	-0.237587	0.0489807	-0.267692	-0.096086	0.190481	-0.126191
ENSMUSG00000003868	-1.02951	-0.0419589	5.46402	0.747917	1	7	45421760	45438096	-1	Ruvbl2	RuvB-like protein 2 [Source:MGI Symbol;Acc:MGI:1342299]	47.5818	42.1924	40.6765	45.3211	40.4893	48.5316	43.4836	44.7806	0.0702269	0.23287	-0.0285132	-0.103199	0.0594441	-0.20194	-0.155987	0.00665611	-0.254727
ENSMUSG00000003873	-1.02073	-0.0296056	7.10021	0.81733	1	7	45461697	45466898	-1	Bax	BCL2-associated X protein [Source:MGI Symbol;Acc:MGI:99702]	139.105	131.899	134.003	140.425	117.833	155.186	135.003	137.815	-0.0136196	0.239437	-0.157825	-0.0903652	0.162691	-0.23457	-0.0675267	0.18553	-0.211732
ENSMUSG00000003923	1.01118	0.0160405	5.45712	0.903509	1	10	71225464	71238280	-1	Tfam	transcription factor A, mitochondrial [Source:MGI Symbol;Acc:MGI:107810]	45.9508	45.6134	43.1908	41.5126	49.2135	42.5292	44.9183	44.4184	0.146541	-0.0989624	0.111637	0.135909	-0.109595	0.101004	0.0571737	-0.18833	0.0222694
ENSMUSG00000003929	1.00512	0.007367	4.29931	0.957246	1	17	33329342	33358878	-1	Zfp81	zinc finger protein 81 [Source:MGI Symbol;Acc:MGI:1890752]	19.6662	19.7658	18.4214	17.5735	24.8025	15.1416	19.2845	19.1725	0.162317	-0.334766	0.3772	0.169607	-0.327476	0.384489	0.0679841	-0.429099	0.282867
ENSMUSG00000003934	-1.1239	-0.168517	0.212991	0.482306	1	11	69554092	69560205	-1	Efnb3	ephrin B3 [Source:MGI Symbol;Acc:MGI:109196]	1.0164	1.39374	1.02065	1.33297	1.0346	1.4478	1.1436	1.27179	-0.391177	-0.0256038	-0.510394	0.0643167	0.42989	-0.0549002	-0.385165	-0.0195916	-0.504382
ENSMUSG00000003948	-1.04428	-0.0625111	5.58143	0.63267	1	11	90249456	90278589	1	Mmd	monocyte to macrophage differentiation-associated [Source:MGI Symbol;Acc:MGI:1914718]	47.9836	44.2514	42.6182	46.2732	52.2334	42.3181	44.9511	46.9416	0.0523647	-0.12243	0.181269	-0.0644562	-0.239251	0.0644477	-0.118707	-0.293502	0.0101965
ENSMUSG00000003949	-1.07091	-0.098843	0.438885	0.77123	1	11	90336536	90390895	-1	Hlf	hepatic leukemia factor [Source:MGI Symbol;Acc:MGI:96108]	0.685481	1.10866	1.02065	0.952124	1.34219	0.663576	0.938262	0.985962	-0.474034	-0.969397	0.0468533	0.219595	-0.275768	0.740482	0.100262	-0.395101	0.621149
ENSMUSG00000003955	-1.07867	-0.10925	4.26608	0.417367	1	16	36043844	36071515	-1	Fam162a	family with sequence similarity 162, member A [Source:MGI Symbol;Acc:MGI:1917436]	19.3116	18.3721	18.3467	19.2873	17.728	23.4665	18.6768	20.1606	0.00181856	0.123438	-0.28113	-0.0701378	0.0514816	-0.353087	-0.072128	0.0494915	-0.355077
ENSMUSG00000003970	-1.03677	-0.0520978	8.70202	0.68246	1	15	76904071	76906318	1	Rpl8	ribosomal protein L8 [Source:MGI Symbol;Acc:MGI:1350927]	421.901	406.941	421.652	452.205	377.685	466.615	416.831	432.168	-0.100069	0.159721	-0.145326	-0.152154	0.107636	-0.197411	-0.100924	0.158866	-0.146181
ENSMUSG00000003992	1.06146	0.0860474	5.68762	0.508833	1	13	91460283	91703429	1	Ssbp2	single-stranded DNA binding protein 2 [Source:MGI Symbol;Acc:MGI:1914220]	54.3893	53.8492	49.9868	48.0687	50.4997	50.4921	52.7418	49.6868	0.178227	0.107048	0.107265	0.163828	0.0926484	0.0928659	0.0564503	-0.0147289	-0.0145114
ENSMUSG00000004018	-1.07685	-0.106818	3.10252	0.473669	1	11	26386135	26471876	1	Fancl	Fanconi anemia, complementation group L [Source:MGI Symbol;Acc:MGI:1914280]	7.32755	9.66118	8.51369	9.57565	10.1503	7.63113	8.50081	9.11902	-0.386039	-0.470117	-0.0585652	0.0128287	-0.0712487	0.340303	-0.169586	-0.253663	0.157888
ENSMUSG00000004032	-1.01368	-0.0195956	4.38065	0.888558	1	3	107895821	107898686	1	Gstm5	glutathione S-transferase, mu 5 [Source:MGI Symbol;Acc:MGI:1309466]	18.6025	21.1912	22.0808	20.9195	19.7972	21.9885	20.6249	20.9018	-0.169352	-0.0898009	-0.241251	0.0186175	0.0981684	-0.0532819	0.0779435	0.157494	0.00604414
ENSMUSG00000004035	-1.19492	-0.256917	1.65848	0.140219	1	3	107926334	107931817	-1	Gstm7	glutathione S-transferase, mu 7 [Source:MGI Symbol;Acc:MGI:1915562]	2.45828	2.94587	2.8379	3.23722	2.79622	3.80048	2.74735	3.27798	-0.39711	-0.185832	-0.628536	-0.136064	0.0752142	-0.36749	-0.189935	0.0213436	-0.421361
ENSMUSG00000004040	1.07087	0.0987836	8.00877	0.438677	1	11	100885098	100939540	-1	Stat3	signal transducer and activator of transcription 3 [Source:MGI Symbol;Acc:MGI:103038]	223.018	271.241	283.068	252.313	251.576	221.936	259.109	241.942	-0.178057	-0.173837	0.00701276	0.104364	0.108584	0.289433	0.165933	0.170153	0.351002
ENSMUSG00000004043	-1.01998	-0.0285436	3.6134	0.844444	1	11	100859351	100885169	1	Stat5a	signal transducer and activator of transcription 5A [Source:MGI Symbol;Acc:MGI:103036]	11.0859	11.7201	12.6212	13.2209	10.9612	11.9444	11.8091	12.0422	-0.2541	0.0163191	-0.107609	-0.173836	0.0965832	-0.0273445	-0.0669775	0.203442	0.0795142
ENSMUSG00000004044	1.03684	0.0521932	8.53196	0.682173	1	11	100956733	100970887	-1	Ptrf	polymerase I and transcript release factor [Source:MGI Symbol;Acc:MGI:1277968]	381.458	373.428	377.017	356.067	376.931	358.693	377.301	363.897	0.099375	0.0172261	0.0887743	0.0686814	-0.0134676	0.0580807	0.0824797	0.000330809	0.0718791
ENSMUSG00000004054	-1.0366	-0.0518607	4.43747	0.69725	1	19	5689131	5702862	1	Map3k11	mitogen-activated protein kinase kinase kinase 11 [Source:MGI Symbol;Acc:MGI:1346880]	22.8572	19.2273	20.861	21.9261	19.266	24.13	20.9819	21.774	0.0600042	0.246597	-0.0781802	-0.189488	-0.00289589	-0.327673	-0.0718366	0.114756	-0.210021
ENSMUSG00000004056	1.04706	0.0663464	6.81664	0.605596	1	7	27591552	27640826	1	Akt2	thymoma viral proto-oncogene 2 [Source:MGI Symbol;Acc:MGI:104874]	112.041	115.111	120.287	118.635	102.817	110.365	115.813	110.606	-0.0825038	0.123943	0.0217416	-0.0435057	0.162941	0.0607397	0.0199545	0.226401	0.1242
ENSMUSG00000004069	1.00732	0.0105289	5.89065	0.93638	1	16	4639989	4707695	1	Dnaja3	DnaJ heat shock protein family (Hsp40) member A3 [Source:MGI Symbol;Acc:MGI:1933786]	61.3151	60.6595	58.0026	60.4463	59.3078	58.9075	59.9924	59.5539	0.0205878	0.0480187	0.0577905	0.00508046	0.0325113	0.0422831	-0.0595358	-0.0321049	-0.0223331
ENSMUSG00000004070	-1.05675	-0.0796274	5.01111	0.546188	1	16	4726361	4766742	1	Hmox2	heme oxygenase 2 [Source:MGI Symbol;Acc:MGI:109373]	32.5249	30.7891	30.5198	33.2155	31.038	34.9282	31.2779	33.0606	-0.0303146	0.0675056	-0.102851	-0.10944	-0.0116199	-0.181976	-0.122111	-0.024291	-0.194647
ENSMUSG00000004071	1.00529	0.00761308	5.25221	0.957153	1	16	4750348	4790292	-1	Cdip1	cell death inducing Trp53 target 1 [Source:MGI Symbol;Acc:MGI:1913876]	39.4742	36.4274	36.1956	38.7106	31.9608	40.8703	37.3657	37.1806	0.0281805	0.304607	-0.0501408	-0.0877069	0.18872	-0.166028	-0.0969154	0.179512	-0.175237
ENSMUSG00000004085	-1.04967	-0.0699382	6.84547	0.586327	1	2	72285637	72442610	1	Map3k20	mitogen-activated protein kinase kinase kinase 20 [Source:MGI Symbol;Acc:MGI:2443258]	113.506	110.549	106.346	115.697	121.076	110.033	110.134	115.602	-0.0275773	-0.0931468	0.0448336	-0.0656589	-0.131228	0.00675201	-0.121576	-0.187146	-0.0491652
ENSMUSG00000004096	-1.07294	-0.101566	6.47958	0.42997	1	9	14500617	14510577	1	Cwc15	CWC15 spliceosome-associated protein [Source:MGI Symbol;Acc:MGI:1913320]	89.1125	86.6338	88.398	88.3299	93.2819	101.829	88.0481	94.4802	0.0127252	-0.06597	-0.192446	-0.0279717	-0.106667	-0.233143	0.00111101	-0.0775842	-0.204061
ENSMUSG00000004098	-1.19586	-0.258048	2.43104	0.100984	1	9	20770050	20815067	-1	Col5a3	collagen, type V, alpha 3 [Source:MGI Symbol;Acc:MGI:1858212]	3.64014	5.28989	5.52643	5.49512	6.26353	5.45942	4.81882	5.73936	-0.594157	-0.782984	-0.584755	-0.0549123	-0.243739	-0.0455109	0.00819742	-0.180629	0.0175988
ENSMUSG00000004099	-1.03254	-0.0461928	7.51252	0.717772	1	9	20907209	20959888	-1	Dnmt1	DNA methyltransferase (cytosine-5) 1 [Source:MGI Symbol;Acc:MGI:94912]	198.08	172.951	173.46	192.547	174.372	195.333	181.497	187.417	0.0408766	0.183914	0.0201512	-0.154846	-0.0118084	-0.175571	-0.150604	-0.00756658	-0.17133
ENSMUSG00000004100	-1.05925	-0.0830425	4.41161	0.536078	1	9	20888175	20892178	1	Ppan	peter pan homolog (Drosophila) [Source:MGI Symbol;Acc:MGI:2178445]	21.6517	20.526	19.8155	21.2732	19.1541	25.2762	20.6644	21.9012	0.0254471	0.176828	-0.223299	-0.0515799	0.0998014	-0.300326	-0.102407	0.0489742	-0.351153
ENSMUSG00000004105	-1.16942	-0.225789	6.90437	0.078673	1	2	33216069	33247717	1	Angptl2	angiopoietin-like 2 [Source:MGI Symbol;Acc:MGI:1347002]	98.1419	95.2814	110.952	134.576	102.314	119.082	101.458	118.657	-0.455479	-0.0600582	-0.279012	-0.498154	-0.102733	-0.321687	-0.278488	0.116933	-0.10202
ENSMUSG00000004127	-1.03624	-0.0513523	4.77905	0.697718	1	3	138143448	138159821	1	Trmt10a	tRNA methyltransferase 10A [Source:MGI Symbol;Acc:MGI:1920421]	30.5157	24.7073	25.5909	26.0066	30.6186	27.1765	26.9379	27.9339	0.230675	-0.00485707	0.167194	-0.0739416	-0.309473	-0.137422	-0.0232492	-0.258781	-0.0867299
ENSMUSG00000004151	1.03845	0.0544343	3.79139	0.689564	1	12	38779380	38870484	1	Etv1	ets variant 1 [Source:MGI Symbol;Acc:MGI:99254]	11.6768	15.1094	14.6625	11.0174	18.2873	10.5267	13.8162	13.2772	0.0838572	-0.647195	0.149588	0.455662	-0.27539	0.521393	0.412339	-0.318713	0.478069
ENSMUSG00000004207	-1.01172	-0.0168075	8.94672	0.895234	1	10	60277627	60302597	1	Psap	prosaposin [Source:MGI Symbol;Acc:MGI:97783]	452.937	520.056	509.104	534.278	479.188	485.949	494.032	499.805	-0.238279	-0.0812816	-0.101494	-0.0389217	0.118075	0.0978631	-0.0696305	0.0873665	0.0671542
ENSMUSG00000004221	1.00399	0.00574028	6.63769	0.964802	1	X	74393290	74453854	1	Ikbkg	inhibitor of kappaB kinase gamma [Source:MGI Symbol;Acc:MGI:1338074]	96.5582	101.553	100.447	101.36	102.09	93.8961	99.5193	99.1155	-0.0700235	-0.0803708	0.0403344	0.00274164	-0.00760567	0.1131	-0.013066	-0.0234133	0.097292
ENSMUSG00000004233	-1.17324	-0.230499	3.16975	0.106331	1	3	99141068	99239186	1	Wars2	tryptophanyl tRNA synthetase 2 (mitochondrial) [Source:MGI Symbol;Acc:MGI:1917810]	9.02943	7.60224	8.0407	10.9358	9.11568	8.92812	8.22413	9.65987	-0.276355	-0.0137145	0.0162794	-0.524566	-0.261926	-0.231932	-0.443668	-0.181028	-0.151034
ENSMUSG00000004263	1.01013	0.0145347	6.79752	0.911048	1	6	124742544	124756524	-1	Atn1	atrophin 1 [Source:MGI Symbol;Acc:MGI:104725]	112.277	108.11	110.553	106.801	99.1819	121.676	110.314	109.22	0.0721354	0.178913	-0.11598	0.0175751	0.124353	-0.17054	0.0498174	0.156595	-0.138298
ENSMUSG00000004264	1.00989	0.0141981	6.66787	0.913686	1	6	124712336	124716950	1	Phb2	prohibitin 2 [Source:MGI Symbol;Acc:MGI:102520]	109.441	96.5801	101.044	104.38	84.2781	115.462	102.355	101.373	0.0683015	0.376918	-0.0772747	-0.112048	0.196568	-0.257624	-0.0468614	0.261755	-0.192438
ENSMUSG00000004266	1.0418	0.0590731	0.192449	0.79528	1	6	124720707	124738714	-1	Ptpn6	protein tyrosine phosphatase, non-receptor type 6 [Source:MGI Symbol;Acc:MGI:96055]	0.992765	1.36207	1.17001	1.00653	1.31422	1.02553	1.17495	1.11543	-0.0198678	-0.404687	-0.0468415	0.436406	0.0515875	0.409433	0.217129	-0.16769	0.190155
ENSMUSG00000004267	1.09654	0.132954	1.94707	0.420087	1	6	124760053	124769673	-1	Eno2	enolase 2, gamma neuronal [Source:MGI Symbol;Acc:MGI:95394]	3.09648	4.43464	3.83365	3.074	3.46731	3.77032	3.78826	3.43721	0.0105121	-0.163189	-0.284057	0.528699	0.354998	0.234129	0.318601	0.1449	0.0240311
ENSMUSG00000004268	-1.05649	-0.0792823	5.5182	0.542855	1	6	124704085	124712178	-1	Emg1	EMG1 N1-specific pseudouridine methyltransferase [Source:MGI Symbol;Acc:MGI:1315195]	47.44	44.0613	43.0414	46.4637	41.5518	54.172	44.8476	47.3958	0.0300007	0.191191	-0.191443	-0.0765907	0.0845999	-0.298034	-0.110377	0.0508135	-0.331821
ENSMUSG00000004270	1.01803	0.0257864	4.79027	0.8511	1	6	124663027	124704418	1	Lpcat3	lysophosphatidylcholine acyltransferase 3 [Source:MGI Symbol;Acc:MGI:1315211]	26.3792	25.1507	28.8519	25.8434	24.7466	28.4131	26.794	26.3344	0.0296057	0.0921725	-0.107158	-0.0391936	0.0233731	-0.175957	0.158874	0.221441	0.0221105
ENSMUSG00000004285	-1.05315	-0.074716	5.92902	0.565181	1	6	29467718	29470512	1	Atp6v1f	ATPase, H+ transporting, lysosomal V1 subunit F [Source:MGI Symbol;Acc:MGI:1913394]	57.7222	62.8768	60.3924	73.3952	48.5424	68.65	60.3305	63.5292	-0.346559	0.249881	-0.250133	-0.223156	0.373284	-0.126731	-0.281318	0.315122	-0.184892
ENSMUSG00000004317	-1.03551	-0.0503439	6.27858	0.696066	1	X	7153810	7319358	-1	Clcn5	chloride channel, voltage-sensitive 5 [Source:MGI Symbol;Acc:MGI:99486]	82.565	71.7461	79.7349	79.0263	85.6203	77.7591	78.0153	80.8019	0.0631966	-0.0524228	0.0865183	-0.139432	-0.255052	-0.116111	0.0128787	-0.102741	0.0362004
ENSMUSG00000004319	1.00542	0.00780016	4.99309	0.956497	1	8	60910389	60983300	-1	Clcn3	chloride channel, voltage-sensitive 3 [Source:MGI Symbol;Acc:MGI:103555]	34.6759	30.2189	31.5903	29.4342	37.6931	28.8656	32.1617	31.9976	0.236436	-0.120367	0.264582	0.0379556	-0.318848	0.066101	0.101985	-0.254819	0.13013
ENSMUSG00000004347	-1.02345	-0.0334419	0.69685	0.932206	1	6	56069804	56569103	-1	Pde1c	phosphodiesterase 1C [Source:MGI Symbol;Acc:MGI:108413]	1.25277	1.39374	1.89193	1.44179	1.76162	1.4478	1.51282	1.5504	-0.202732	-0.491775	-0.208738	-0.048894	-0.337937	-0.0549002	0.392	0.102957	0.385994
ENSMUSG00000004356	-1.04052	-0.0573103	7.14264	0.65457	1	10	88746607	88826804	-1	Utp20	UTP20 small subunit processome component [Source:MGI Symbol;Acc:MGI:1917933]	146.267	128.161	132.933	142.329	141.657	139.924	135.787	141.303	0.0393788	0.0462109	0.0639633	-0.151271	-0.144439	-0.126687	-0.0985298	-0.0916976	-0.0739452
ENSMUSG00000004359	-1.13952	-0.188424	1.70934	0.258425	1	10	88674772	88685015	-1	Spic	Spi-C transcription factor (Spi-1/PU.1 related) [Source:MGI Symbol;Acc:MGI:1341168]	3.19103	2.81916	3.2362	3.34604	2.88011	4.37357	3.08213	3.53324	-0.0684308	0.1479	-0.45479	-0.247186	-0.0308555	-0.633545	-0.0481537	0.168177	-0.434512
ENSMUSG00000004364	1.06756	0.0943236	6.96543	0.462115	1	1	80264923	80340480	-1	Cul3	cullin 3 [Source:MGI Symbol;Acc:MGI:1347360]	128.374	123.98	123.573	114.255	142.691	95.1629	125.309	117.37	0.168097	-0.152543	0.431882	0.117849	-0.20279	0.381634	0.113107	-0.207533	0.376892
ENSMUSG00000004383	1.03854	0.0545614	6.43934	0.672264	1	8	72814599	73353540	-1	Large1	LARGE xylosyl- and glucuronyltransferase 1 [Source:MGI Symbol;Acc:MGI:1342270]	84.9287	88.9462	94.721	89.9893	83.2714	85.3601	89.532	86.2069	-0.0835022	0.02843	-0.00730919	-0.0168214	0.0951108	0.0593716	0.0739303	0.185862	0.150123
ENSMUSG00000004393	-1.02625	-0.0373842	5.57282	0.775198	1	11	6258919	6267772	-1	Ddx56	DEAD (Asp-Glu-Ala-Asp) box polypeptide 56 [Source:MGI Symbol;Acc:MGI:1277172]	48.1727	47.6407	46.0785	50.6802	43.4253	51.5177	47.2973	48.5411	-0.0732055	0.149681	-0.09685	-0.0892282	0.133658	-0.112873	-0.13733	0.0855568	-0.160974
ENSMUSG00000004394	-1.02364	-0.0337032	5.88318	0.79609	1	11	6270369	6274870	-1	Tmed4	transmembrane p24 trafficking protein 4 [Source:MGI Symbol;Acc:MGI:1915070]	57.7458	60.5645	59.1726	59.875	59.0562	62.7381	59.161	60.5564	-0.0522372	-0.0323712	-0.119626	0.0165183	0.0363843	-0.0508703	-0.0170242	0.0028418	-0.0844128
ENSMUSG00000004446	-1.09481	-0.130683	5.31406	0.317776	1	6	120891930	120916853	-1	Bid	BH3 interacting domain death agonist [Source:MGI Symbol;Acc:MGI:108093]	41.2234	39.5316	36.4446	43.172	37.022	48.1394	39.0665	42.7778	-0.066634	0.155082	-0.223757	-0.127089	0.0946264	-0.284212	-0.244394	-0.0226778	-0.401516
ENSMUSG00000004451	-1.04307	-0.0608421	6.03252	0.638592	1	1	119470305	119504794	-1	Ralb	v-ral simian leukemia viral oncogene B [Source:MGI Symbol;Acc:MGI:1927244]	64.4115	64.4923	65.2467	66.023	65.7112	70.7915	64.7169	67.5086	-0.0356498	-0.0288197	-0.136258	-0.0338417	-0.0270116	-0.13445	-0.0170637	-0.0102337	-0.117672
ENSMUSG00000004455	1.0822	0.113968	7.07194	0.374177	1	5	122158278	122175273	1	Ppp1cc	protein phosphatase 1, catalytic subunit, gamma isoform [Source:MGI Symbol;Acc:MGI:104872]	143.525	129.016	130.867	126.578	137.155	109.038	134.47	124.257	0.181279	0.0655035	0.39648	0.0275255	-0.0882497	0.242727	0.0480716	-0.0677037	0.263273
ENSMUSG00000004460	-1.06984	-0.0974017	7.34371	0.446648	1	16	22857845	22879634	1	Dnajb11	DnaJ heat shock protein family (Hsp40) member B11 [Source:MGI Symbol;Acc:MGI:1915088]	155.557	158.158	161.76	165.67	178.595	164.416	158.492	169.56	-0.0908673	-0.199247	-0.0799102	-0.0669404	-0.17532	-0.0559833	-0.0344534	-0.142833	-0.0234963
ENSMUSG00000004462	1.06445	0.0901047	3.84949	0.512004	1	16	22813215	22857569	-1	Tbccd1	TBCC domain containing 1 [Source:MGI Symbol;Acc:MGI:1917823]	14.4187	16.0914	14.4384	14.3907	13.5617	14.2367	14.9828	14.063	0.00280962	0.0884093	0.0183263	0.161156	0.246755	0.176672	0.00477821	0.0903779	0.0202949
ENSMUSG00000004500	1.1109	0.151728	4.26648	0.260939	1	7	12965838	12974236	1	Zfp324	zinc finger protein 324 [Source:MGI Symbol;Acc:MGI:2444641]	19.028	20.3677	21.6825	18.3352	19.4058	17.2228	20.3594	18.3213	0.0535083	-0.0283621	0.143802	0.151665	0.0697947	0.241959	0.241917	0.160047	0.332211
ENSMUSG00000004508	-1.04006	-0.0566695	5.92065	0.662924	1	7	97081586	97308946	1	Gab2	growth factor receptor bound protein 2-associated protein 2 [Source:MGI Symbol;Acc:MGI:1333854]	56.9894	61.1663	63.8278	62.9762	65.6832	60.5966	60.6612	63.0853	-0.144112	-0.20483	-0.088542	-0.0420691	-0.102787	0.0135013	0.0193771	-0.0413407	0.0749476
ENSMUSG00000004530	1.00056	0.000813632	7.59389	0.995714	1	5	113842436	113908758	-1	Coro1c	coronin, actin binding protein 1C [Source:MGI Symbol;Acc:MGI:1345964]	206.661	182.644	192.703	205.822	171.101	204.804	194.002	193.909	0.00586573	0.272417	0.0130207	-0.172365	0.0941865	-0.16521	-0.0950178	0.171534	-0.0878628
ENSMUSG00000004535	1.0593	0.0831174	7.88632	0.514835	1	6	52713729	52766780	1	Tax1bp1	Tax1 (human T cell leukemia virus type I) binding protein 1 [Source:MGI Symbol;Acc:MGI:1289308]	232.331	250.019	244.059	225.245	260.021	200.43	242.136	228.565	0.044682	-0.162446	0.213079	0.150538	-0.0565903	0.318935	0.115733	-0.0913954	0.28413
ENSMUSG00000004558	1.03269	0.0464045	4.03808	0.728595	1	14	51905271	51913488	-1	Ndrg2	N-myc downstream regulated gene 2 [Source:MGI Symbol;Acc:MGI:1352498]	13.7096	20.8745	19.3923	16.8662	17.001	18.3087	17.9921	17.392	-0.298947	-0.310434	-0.41734	0.307605	0.296119	0.189213	0.201348	0.189862	0.0829557
ENSMUSG00000004561	-1.02475	-0.0352786	2.79639	0.80437	1	14	51884842	51893039	1	Mettl17	methyltransferase like 17 [Source:MGI Symbol;Acc:MGI:1098577]	7.46937	6.24017	6.64665	7.04572	5.64837	8.23438	6.7854	6.97615	0.0842406	0.403154	-0.140672	-0.175162	0.143752	-0.400075	-0.0841193	0.234794	-0.309032
ENSMUSG00000004562	1.04349	0.0614137	7.0673	0.631757	1	14	51984719	52006251	1	Arhgef40	Rho guanine nucleotide exchange factor (GEF) 40 [Source:MGI Symbol;Acc:MGI:2685515]	126.081	143.112	146.65	137.84	129.884	130.755	138.614	132.827	-0.128646	-0.042876	-0.0525102	0.0541473	0.139917	0.130283	0.0893738	0.175144	0.165509
ENSMUSG00000004565	-1.08212	-0.113863	4.48331	0.393631	1	8	3515384	3544267	1	Pnpla6	patatin-like phospholipase domain containing 6 [Source:MGI Symbol;Acc:MGI:1354723]	22.1245	20.2093	22.031	23.3134	19.8252	26.5732	21.4549	23.2373	-0.0755186	0.158308	-0.26433	-0.206144	0.0276824	-0.394955	-0.0816247	0.152202	-0.270436
ENSMUSG00000004567	1.12501	0.169944	4.86842	0.199338	1	8	3500457	3515232	1	Mcoln1	mucolipin 1 [Source:MGI Symbol;Acc:MGI:1890498]	28.9556	31.3276	29.6734	28.2373	24.5508	27.1463	29.9855	26.6448	0.0362434	0.238074	0.0930888	0.149831	0.351661	0.206676	0.0715708	0.273401	0.128416
ENSMUSG00000004568	-1.0457	-0.0644678	6.10325	0.617936	1	8	3393006	3456601	1	Arhgef18	rho/rac guanine nucleotide exchange factor (GEF) 18 [Source:MGI Symbol;Acc:MGI:2142567]	68.4535	64.7774	69.2546	71.1917	65.9908	74.592	67.4952	70.5915	-0.0565842	0.0528595	-0.123897	-0.136218	-0.0267744	-0.203531	-0.0397985	0.0696453	-0.107111
ENSMUSG00000004591	-1.00282	-0.00406891	7.26277	0.975172	1	3	142790902	142882004	-1	Pkn2	protein kinase N2 [Source:MGI Symbol;Acc:MGI:109211]	160.332	150.239	148.218	140.398	184.075	135.611	152.93	153.361	0.191541	-0.199237	0.241585	0.0977441	-0.293034	0.147789	0.0782016	-0.312576	0.128246
ENSMUSG00000004610	-1.13158	-0.178334	5.68902	0.169571	1	7	43444083	43457800	1	Etfb	electron transferring flavoprotein, beta polypeptide [Source:MGI Symbol;Acc:MGI:106098]	51.1038	47.9258	50.2606	56.801	49.7727	62.4063	49.7634	56.3267	-0.152487	0.0380741	-0.288263	-0.245115	-0.0545537	-0.380891	-0.176488	0.0140734	-0.312264
ENSMUSG00000004626	-1.19248	-0.253961	4.79276	0.0546784	1	8	3630955	3643644	1	Stxbp2	syntaxin binding protein 2 [Source:MGI Symbol;Acc:MGI:107370]	27.7265	24.2005	25.3917	32.1002	24.1034	36.0744	25.7729	30.7593	-0.211316	0.202028	-0.37971	-0.407547	0.00579635	-0.575942	-0.338225	0.0751191	-0.506619
ENSMUSG00000004631	1.0802	0.111295	5.92533	0.389525	1	6	4674350	4747207	-1	Sgce	sarcoglycan, epsilon [Source:MGI Symbol;Acc:MGI:1329042]	56.824	68.4201	68.8812	61.5888	63.1387	54.926	64.7084	59.8845	-0.116169	-0.152024	0.0490099	0.151752	0.115897	0.316931	0.161442	0.125587	0.326621
ENSMUSG00000004633	-1.02347	-0.0334669	3.43986	0.813257	1	6	54039554	54301810	1	Chn2	chimerin 2 [Source:MGI Symbol;Acc:MGI:1917243]	12.1496	11.435	11.3267	11.5887	11.4086	12.7588	11.6371	11.9187	0.068183	0.090784	-0.0705854	-0.0192597	0.00334126	-0.158028	-0.0329938	-0.0103929	-0.171762
ENSMUSG00000004637	-1.0184	-0.0262995	2.52125	0.889327	1	8	114439655	115352708	1	Wwox	WW domain-containing oxidoreductase [Source:MGI Symbol;Acc:MGI:1931237]	4.96382	6.49358	5.37707	5.3863	6.48723	5.18796	5.61149	5.68716	-0.117843	-0.386151	-0.0637153	0.269718	0.00141068	0.323846	-0.00247608	-0.270784	0.0516516
ENSMUSG00000004642	-1.00656	-0.00943296	6.09635	0.942553	1	5	33634952	33652574	-1	Slbp	stem-loop binding protein [Source:MGI Symbol;Acc:MGI:108402]	77.2466	68.1667	60.8654	66.6215	72.5899	68.4389	68.7596	69.2167	0.213483	0.0897024	0.174655	0.0330802	-0.0907007	-0.00574783	-0.130365	-0.254146	-0.169193
ENSMUSG00000004651	1.10816	0.148166	0.405335	0.555345	1	7	87424771	87493512	-1	Tyr	tyrosinase [Source:MGI Symbol;Acc:MGI:98880]	1.34732	1.20369	0.871284	0.734496	0.587206	1.80975	1.14077	1.04382	0.875271	1.19816	-0.425697	0.712635	1.03552	-0.588332	0.246389	0.569275	-1.05458
ENSMUSG00000004661	-1.09047	-0.12495	1.29163	0.464292	1	9	57790353	57836793	-1	Arid3b	AT rich interactive domain 3B (BRIGHT-like) [Source:MGI Symbol;Acc:MGI:1930768]	3.00193	2.05894	2.24044	2.42112	2.5166	3.10674	2.43377	2.68149	0.310219	0.254416	-0.0495119	-0.233771	-0.289574	-0.593502	-0.111887	-0.16769	-0.471619
ENSMUSG00000004665	-1.05938	-0.0832149	8.57528	0.513431	1	10	79988584	79996062	1	Cnn2	calponin 2 [Source:MGI Symbol;Acc:MGI:105093]	389.4	333.01	374.154	404.163	335.463	422.125	365.521	387.25	-0.0536838	0.215102	-0.116417	-0.279374	-0.0105877	-0.342106	-0.111305	0.157481	-0.174038
ENSMUSG00000004667	-1.12156	-0.16551	5.40844	0.204677	1	10	80035949	80039795	-1	Polr2e	polymerase (RNA) II (DNA directed) polypeptide E [Source:MGI Symbol;Acc:MGI:1913670]	42.5471	40.5136	40.0044	47.2254	38.504	52.332	41.0217	46.0205	-0.150502	0.144053	-0.298635	-0.221156	0.0733993	-0.369289	-0.239404	0.0551511	-0.387537
ENSMUSG00000004677	-1.06349	-0.0888068	7.23513	0.487988	1	8	71272714	71360713	1	Myo9b	myosin IXb [Source:MGI Symbol;Acc:MGI:106624]	145.086	143.144	148.84	157.209	150.325	157.298	145.69	154.944	-0.115783	-0.0511797	-0.116595	-0.135221	-0.070618	-0.136033	-0.0789226	-0.0143192	-0.0797342
ENSMUSG00000004730	1.08894	0.122927	1.09479	0.471322	1	17	57358686	57483529	1	Adgre1	adhesion G protein-coupled receptor E1 [Source:MGI Symbol;Acc:MGI:106912]	1.91462	2.97754	2.48938	2.33951	2.60049	1.74943	2.46051	2.22981	-0.289147	-0.441724	0.130173	0.347919	0.195342	0.767239	0.0895845	-0.0629929	0.508904
ENSMUSG00000004768	1.07413	0.103164	6.24284	0.423672	1	1	33719887	33742564	1	Rab23	RAB23, member RAS oncogene family [Source:MGI Symbol;Acc:MGI:99833]	74.7174	82.4843	82.0749	74.5377	81.7335	66.4481	79.7589	74.2398	0.00347325	-0.129484	0.169215	0.146148	0.0131912	0.311891	0.138971	0.00601379	0.304713
ENSMUSG00000004771	1.00333	0.00478948	6.73569	0.970705	1	9	64715299	64737758	-1	Rab11a	RAB11A, member RAS oncogene family [Source:MGI Symbol;Acc:MGI:1858202]	108.448	106.748	103.384	103.02	121.552	92.9309	106.193	105.834	0.0740781	-0.16457	0.222771	0.0512881	-0.18736	0.199981	0.00509149	-0.233556	0.153784
ENSMUSG00000004788	-1.0582	-0.0816139	5.85321	0.528957	1	12	85219481	85226628	1	Eif2b2	eukaryotic translation initiation factor 2B, subunit 2 beta [Source:MGI Symbol;Acc:MGI:2145118]	58.8095	54.7995	56.7579	62.4321	53.1282	64.759	56.789	60.1065	-0.0862396	0.146572	-0.139032	-0.188127	0.0446842	-0.240919	-0.137467	0.0953441	-0.19026
ENSMUSG00000004789	-1.04199	-0.0593458	7.29093	0.642783	1	12	85110833	85134845	1	Dlst	dihydrolipoamide S-succinyltransferase (E2 component of 2-oxo-glutarate complex) [Source:MGI Symbol;Acc:MGI:1926170]	158.724	145.741	153.246	160.011	146.969	169.996	152.571	158.992	-0.0116513	0.111007	-0.0989803	-0.134764	-0.0121062	-0.222093	-0.0623205	0.0603377	-0.14965
ENSMUSG00000004791	1.00339	0.00487985	1.75567	1	1	12	85166635	85177790	-1	Pgf	placental growth factor [Source:MGI Symbol;Acc:MGI:105095]	3.56923	3.89615	3.2362	2.66595	3.74694	4.25292	3.56719	3.55527	0.420963	-0.0700997	-0.252843	0.5474	0.0563369	-0.126406	0.279651	-0.211412	-0.394155
ENSMUSG00000004798	1.0283	0.0402603	5.76321	0.756769	1	11	61775649	61855073	-1	Ulk2	unc-51 like kinase 2 [Source:MGI Symbol;Acc:MGI:1352758]	49.331	54.356	57.5545	51.5235	60.1187	45.1232	53.7472	52.2552	-0.0627376	-0.285321	0.128624	0.0772081	-0.145376	0.26857	0.159698	-0.0628855	0.35106
ENSMUSG00000004815	-1.02482	-0.0353649	4.78426	0.791639	1	5	108646693	108669672	-1	Dgkq	diacylglycerol kinase, theta [Source:MGI Symbol;Acc:MGI:102918]	27.0647	26.9563	26.1634	25.925	27.1233	29.137	26.7281	27.3951	0.0620676	-0.00312426	-0.106444	0.0562778	-0.00891404	-0.112233	0.0132076	-0.0519843	-0.155304
ENSMUSG00000004837	-1.03561	-0.0504765	1.29363	0.793898	1	11	61653265	61672784	1	Grap	GRB2-related adaptor protein [Source:MGI Symbol;Acc:MGI:1918770]	2.17463	2.85084	2.63875	2.55713	2.71233	2.62414	2.55474	2.6312	-0.233759	-0.318766	-0.271078	0.156859	0.0718518	0.11954	0.0453246	-0.0396827	0.00800581
ENSMUSG00000004843	1.00495	0.00712667	5.70602	0.956315	1	16	65539133	65562697	-1	Chmp2b	charged multivesicular body protein 2B [Source:MGI Symbol;Acc:MGI:1916192]	51.7183	55.338	53.3226	49.2656	66.3263	43.9469	53.4596	53.1796	0.0700943	-0.358906	0.234916	0.167688	-0.261313	0.332509	0.114165	-0.314836	0.278986
ENSMUSG00000004846	1.03627	0.0513968	7.91959	0.687211	1	5	136987019	136996648	1	Plod3	procollagen-lysine, 2-oxoglutarate 5-dioxygenase 3 [Source:MGI Symbol;Acc:MGI:1347008]	226.918	254.58	266.737	248.613	230.604	242.809	249.412	240.675	-0.131734	-0.0232502	-0.0976505	0.0342157	0.142699	0.068299	0.101517	0.21	0.1356
ENSMUSG00000004849	-1.0453	-0.0639165	6.67912	0.619024	1	5	137034993	137046135	-1	Ap1s1	adaptor protein complex AP-1, sigma 1 [Source:MGI Symbol;Acc:MGI:1098244]	103.602	100.603	98.0817	109.766	86.3752	119.866	100.762	105.336	-0.0833819	0.262364	-0.210369	-0.125763	0.219983	-0.25275	-0.16238	0.183365	-0.289367
ENSMUSG00000004864	-1.00859	-0.0123389	2.477	0.93645	1	17	28769307	28778698	1	Mapk13	mitogen-activated protein kinase 13 [Source:MGI Symbol;Acc:MGI:1346864]	6.00386	5.06816	5.15302	6.22961	3.49528	6.69609	5.40835	5.47366	-0.053251	0.780485	-0.157427	-0.297681	0.536055	-0.401857	-0.273724	0.560012	-0.3779
ENSMUSG00000004865	1.1142	0.15601	6.88381	0.224549	1	17	28587648	28622521	-1	Srpk1	serine/arginine-rich protein specific kinase 1 [Source:MGI Symbol;Acc:MGI:106908]	139.531	120.432	117.325	102.993	102.286	133.409	125.762	112.896	0.438042	0.447978	0.064727	0.225679	0.235615	-0.147636	0.187964	0.1979	-0.185351
ENSMUSG00000004872	1.0683	0.0953205	3.84287	0.494192	1	1	78101267	78197134	-1	Pax3	paired box 3 [Source:MGI Symbol;Acc:MGI:97487]	15.1988	13.0505	14.4384	14.3635	13.6735	11.9444	14.2292	13.3271	0.0815489	0.152569	0.347622	-0.138299	-0.0672786	0.127775	0.00750801	0.0785282	0.273581
ENSMUSG00000004880	-1.04725	-0.0666031	5.50058	0.608877	1	1	181815335	181843046	-1	Lbr	lamin B receptor [Source:MGI Symbol;Acc:MGI:2138281]	50.1583	41.1154	41.1993	45.4299	45.4665	47.8981	44.1577	46.2649	0.142845	0.141682	0.0665177	-0.143963	-0.145125	-0.22029	-0.141024	-0.142186	-0.217351
ENSMUSG00000004891	-1.15607	-0.209224	7.26069	0.101892	1	3	87971078	87980451	1	Nes	nestin [Source:MGI Symbol;Acc:MGI:101784]	171.843	117.233	131.066	156.42	160.559	168.88	140.047	161.953	0.135662	0.0979868	0.0250901	-0.416052	-0.453727	-0.526623	-0.255135	-0.29281	-0.365707
ENSMUSG00000004895	-1.04462	-0.0629821	5.24068	0.631426	1	3	87858903	87885608	-1	Prcc	papillary renal cell carcinoma (translocation-associated) [Source:MGI Symbol;Acc:MGI:2137738]	36.6378	38.0745	39.0086	38.8195	35.6238	44.3691	37.907	39.6041	-0.083449	0.0404877	-0.276225	-0.0279536	0.0959832	-0.22073	0.00701288	0.13095	-0.185763
ENSMUSG00000004896	-1.03875	-0.0548509	3.49437	0.703014	1	3	87922601	87930717	-1	Rrnad1	ribosomal RNA adenine dimethylase domain containing 1 [Source:MGI Symbol;Acc:MGI:2387197]	10.755	12.2586	10.6795	11.3983	10.0944	13.4827	11.231	11.6584	-0.0838156	0.0914525	-0.326104	0.104978	0.280246	-0.137311	-0.0939796	0.0812885	-0.336268
ENSMUSG00000004897	-1.00646	-0.00929514	8.82282	0.941814	1	3	87906321	87916132	1	Hdgf	hepatoma-derived growth factor [Source:MGI Symbol;Acc:MGI:1194494]	485.58	445.776	453.516	447.906	441.915	504.047	461.624	464.623	0.116512	0.135942	-0.0538473	-0.00687772	0.0125517	-0.177237	0.0179551	0.0373846	-0.152405
ENSMUSG00000004929	-1.13407	-0.181509	4.57754	0.172203	1	10	81070035	81082559	1	Thop1	thimet oligopeptidase 1 [Source:MGI Symbol;Acc:MGI:1354165]	25.2682	21.0329	22.0808	27.3396	23.0688	27.2066	22.794	25.8717	-0.113666	0.131381	-0.106634	-0.378345	-0.133299	-0.371313	-0.308196	-0.0631503	-0.301164
ENSMUSG00000004931	1.05905	0.0827768	3.65705	0.552539	1	10	81266960	81273246	1	Apba3	amyloid beta (A4) precursor protein-binding, family A, member 3 [Source:MGI Symbol;Acc:MGI:1888527]	13.0005	13.6207	13.3929	13.6562	11.3527	12.7588	13.338	12.5892	-0.0709876	0.195537	0.0270779	-0.00375582	0.262769	0.0943097	-0.0280882	0.238436	0.0699774
ENSMUSG00000004934	-1.02245	-0.0320273	4.03093	0.819132	1	10	81153266	81167923	-1	Pias4	protein inhibitor of activated STAT 4 [Source:MGI Symbol;Acc:MGI:2136940]	15.0333	16.0597	16.5295	16.567	15.4072	16.7101	15.8742	16.2281	-0.140147	-0.0354408	-0.152555	-0.0448616	0.059845	-0.0572695	-0.00326595	0.101441	-0.0156739
ENSMUSG00000004936	1.02375	0.0338691	7.42249	0.791277	1	9	64185770	64253631	-1	Map2k1	mitogen-activated protein kinase kinase 1 [Source:MGI Symbol;Acc:MGI:1346866]	165.65	179.635	170.249	167.628	168.36	167.553	171.844	167.847	-0.0171278	-0.0234155	-0.0164802	0.0997994	0.0935116	0.100447	0.0223797	0.016092	0.0230273
ENSMUSG00000004937	-1.00384	-0.00553496	5.90584	0.966248	1	10	81044075	81060181	-1	Sgta	small glutamine-rich tetratricopeptide repeat (TPR)-containing, alpha [Source:MGI Symbol;Acc:MGI:1098703]	60.6059	58.5056	61.1143	61.7248	50.1922	69.0421	60.0753	60.3197	-0.0263922	0.271997	-0.188017	-0.0772779	0.221112	-0.238903	-0.0143405	0.284049	-0.175966
ENSMUSG00000004945	-1.04532	-0.0639453	5.13944	0.628296	1	17	5410870	5440259	-1	Tmem242	transmembrane protein 242 [Source:MGI Symbol;Acc:MGI:1917794]	32.2649	35.4138	35.872	36.5888	33.2471	38.3969	34.5169	36.0776	-0.181437	-0.043263	-0.251028	-0.0470911	0.091083	-0.116682	-0.0285428	0.109631	-0.0981332
ENSMUSG00000004947	-1.05566	-0.0781505	3.4451	0.578538	1	5	135994800	136032872	1	Dtx2	deltex 2, E3 ubiquitin ligase [Source:MGI Symbol;Acc:MGI:1921448]	10.9441	9.94626	10.306	11.1535	9.33938	12.4873	10.3988	10.9934	-0.0273436	0.228749	-0.190315	-0.165264	0.090828	-0.328236	-0.114	0.142092	-0.276971
ENSMUSG00000004951	-1.02527	-0.036002	6.76146	0.779345	1	5	135887919	135889563	1	Hspb1	heat shock protein 1 [Source:MGI Symbol;Acc:MGI:96240]	108.33	108.269	114.81	127.177	82.9359	129.699	110.469	113.27	-0.231406	0.385358	-0.25974	-0.232219	0.384545	-0.260554	-0.147581	0.469184	-0.175915
ENSMUSG00000004952	-1.04948	-0.0696767	4.9423	0.597859	1	5	136083916	136111860	1	Rasa4	RAS p21 protein activator 4 [Source:MGI Symbol;Acc:MGI:1858600]	30.8939	31.4859	32.0632	31.7193	31.4295	35.9839	31.481	33.0443	-0.0380405	-0.0247981	-0.220031	-0.0106551	0.0025873	-0.192646	0.0155578	0.0288003	-0.166433
ENSMUSG00000004980	-1.01016	-0.0145798	9.52887	0.908823	1	6	51460932	51469894	-1	Hnrnpa2b1	heterogeneous nuclear ribonucleoprotein A2/B1 [Source:MGI Symbol;Acc:MGI:104819]	785.088	735.58	703.599	691.514	875.329	680.015	741.422	748.953	0.183096	-0.156971	0.207288	0.0891231	-0.250943	0.113315	0.0249947	-0.315072	0.049187
ENSMUSG00000004994	1.01787	0.0255559	2.89444	0.873691	1	8	84257795	84270380	-1	Ccdc130	coiled-coil domain containing 130 [Source:MGI Symbol;Acc:MGI:1914986]	7.35119	7.63391	7.41836	6.77368	7.13036	8.11373	7.46782	7.33926	0.118037	0.0440021	-0.142388	0.172482	0.0984475	-0.0879423	0.13116	0.0571248	-0.129265
ENSMUSG00000004996	-1.09287	-0.128122	4.36148	0.339857	1	8	84249906	84257326	-1	Mri1	methylthioribose-1-phosphate isomerase 1 [Source:MGI Symbol;Acc:MGI:1915123]	19.9971	19.5758	20.8361	24.1023	17.3645	24.5825	20.1363	22.0165	-0.269381	0.203649	-0.297838	-0.300105	0.172925	-0.328563	-0.210086	0.262944	-0.238544
ENSMUSG00000005034	1.07937	0.110185	6.85224	0.390394	1	3	146729574	146812990	-1	Prkacb	protein kinase, cAMP dependent, catalytic, beta [Source:MGI Symbol;Acc:MGI:97594]	110.386	122.301	130.294	104.38	136.679	95.193	120.994	112.084	0.0807119	-0.308237	0.213629	0.228591	-0.160358	0.361508	0.319928	-0.0690206	0.452846
ENSMUSG00000005043	-1.06642	-0.09278	5.10373	0.481703	1	11	119343425	119355536	-1	Sgsh	N-sulfoglucosamine sulfohydrolase (sulfamidase) [Source:MGI Symbol;Acc:MGI:1350341]	32.3594	33.3548	34.7767	39.8532	32.0726	35.2299	33.497	35.7186	-0.30051	0.0128419	-0.122614	-0.2568	0.0565516	-0.0789041	-0.196576	0.116776	-0.0186794
ENSMUSG00000005054	-1.03837	-0.0543243	6.48755	0.673187	1	10	78425669	78427622	1	Cstb	cystatin B [Source:MGI Symbol;Acc:MGI:109514]	92.5399	89.7381	87.6512	98.232	78.7695	103.307	89.9764	93.4361	-0.086118	0.232438	-0.158788	-0.130473	0.188083	-0.203143	-0.16442	0.154135	-0.23709
ENSMUSG00000005057	-1.00667	-0.00959145	1.61591	0.956881	1	5	136218147	136246556	-1	Sh2b2	SH2B adaptor protein 2 [Source:MGI Symbol;Acc:MGI:1345171]	2.67101	2.75581	3.06194	2.80197	2.79622	2.95593	2.82959	2.85137	-0.0690535	-0.0660924	-0.146227	-0.0239621	-0.0210011	-0.101136	0.128007	0.130968	0.0508335
ENSMUSG00000005069	-1.01509	-0.0216023	5.62201	0.868198	1	6	124396816	124415067	-1	Pex5	peroxisomal biogenesis factor 5 [Source:MGI Symbol;Acc:MGI:1098808]	49.1419	45.2333	48.5181	47.3342	44.7395	53.0258	47.6311	48.3665	0.0540706	0.135403	-0.109741	-0.0654964	0.0158357	-0.229308	0.0356398	0.116972	-0.128172
ENSMUSG00000005078	1.01841	0.0263181	5.15155	0.843204	1	12	72085589	72101461	1	Jkamp	JNK1/MAPK8-associated membrane protein [Source:MGI Symbol;Acc:MGI:1915057]	34.4631	35.1603	36.8429	35.3918	34.6731	34.4758	35.4888	34.8469	-0.0383621	-0.00876461	-0.000530761	-0.0094664	0.0201311	0.028365	0.0579693	0.0875668	0.0958006
ENSMUSG00000005087	-1.04062	-0.0574501	9.02636	0.651527	1	2	102811141	102901665	-1	Cd44	CD44 antigen [Source:MGI Symbol;Acc:MGI:88338]	578.758	426.897	456.428	487.352	511.457	522.778	487.361	507.195	0.247998	0.178349	0.146764	-0.191074	-0.260723	-0.292308	-0.0945747	-0.164224	-0.195809
ENSMUSG00000005102	-1.0786	-0.109165	5.14384	0.405686	1	2	118388618	118475234	1	Eif2ak4	eukaryotic translation initiation factor 2 alpha kinase 4 [Source:MGI Symbol;Acc:MGI:1353427]	35.4323	30.599	32.6607	36.2895	33.3869	36.8285	32.8973	35.5016	-0.0344902	0.0857823	-0.0557589	-0.246069	-0.125796	-0.267337	-0.151998	-0.0317254	-0.173267
ENSMUSG00000005103	-1.08158	-0.113143	9.0236	0.373915	1	5	38526813	38563221	-1	Wdr1	WD repeat domain 1 [Source:MGI Symbol;Acc:MGI:1337100]	531.484	446.536	493.893	539.8	479.58	572.697	490.638	530.692	-0.0223992	0.148255	-0.107745	-0.273647	-0.102993	-0.358993	-0.128225	0.0424291	-0.213571
ENSMUSG00000005107	1.15207	0.204225	3.34512	0.148593	1	5	38349273	38503143	-1	Slc2a9	solute carrier family 2 (facilitated glucose transporter), member 9 [Source:MGI Symbol;Acc:MGI:2152844]	9.50218	11.7835	11.3018	8.84115	9.8427	9.56153	10.8625	9.41513	0.104024	-0.0507951	-0.00898342	0.414458	0.259639	0.30145	0.354246	0.199427	0.241238
ENSMUSG00000005142	-1.01433	-0.0205298	5.48903	0.876628	1	8	85083270	85098282	1	Man2b1	mannosidase 2, alpha B1 [Source:MGI Symbol;Acc:MGI:107286]	42.0034	44.0613	46.9	47.579	41.412	45.8773	44.3216	44.9561	-0.179819	0.0204568	-0.127273	-0.110813	0.0894624	-0.058267	-0.0207383	0.179537	0.0318077
ENSMUSG00000005148	-1.2718	-0.346874	0.233293	0.120213	1	14	99298691	99313405	1	Klf5	Kruppel-like factor 5 [Source:MGI Symbol;Acc:MGI:1338056]	1.13459	0.886928	1.14512	1.4962	0.838866	1.74943	1.05554	1.3615	-0.399129	0.435657	-0.624715	-0.75441	0.0803759	-0.979995	-0.385805	0.448981	-0.61139
ENSMUSG00000005150	1.05012	0.0705588	3.4885	0.619898	1	8	85075035	85081306	-1	Wdr83	WD repeat domain containing 83 [Source:MGI Symbol;Acc:MGI:1915086]	10.6604	11.7201	11.8246	11.1263	9.19957	12.246	11.4017	10.8573	-0.0617053	0.212625	-0.200048	0.0750193	0.349349	-0.0633238	0.0878197	0.36215	-0.0505234
ENSMUSG00000005161	-1.05556	-0.0780147	8.00482	0.540906	1	8	84969587	84974834	1	Prdx2	peroxiredoxin 2 [Source:MGI Symbol;Acc:MGI:109486]	250.555	253.408	253.27	277.558	218.245	303.526	252.411	266.443	-0.147661	0.199179	-0.276692	-0.131327	0.215513	-0.260358	-0.132113	0.214726	-0.261145
ENSMUSG00000005198	-1.05776	-0.081009	8.12515	0.525271	1	11	69733997	69758637	-1	Polr2a	polymerase (RNA) II (DNA directed) polypeptide A [Source:MGI Symbol;Acc:MGI:98086]	274.641	261.992	269.824	274.973	266.704	311.398	268.819	284.358	-0.00174356	0.042312	-0.181212	-0.069769	-0.0257134	-0.249238	-0.0272729	0.0167827	-0.206742
ENSMUSG00000005204	1.00842	0.0120913	6.57285	0.926065	1	11	69673115	69682084	-1	Senp3	SUMO/sentrin specific peptidase 3 [Source:MGI Symbol;Acc:MGI:2158736]	97.5273	96.2633	91.684	94.2875	87.8293	100.984	95.1582	94.367	0.0487403	0.151105	-0.0502518	0.0299199	0.132284	-0.0690721	-0.0403972	0.0619672	-0.139389
ENSMUSG00000005225	-1.09892	-0.13609	4.48301	0.309312	1	6	54595111	54645839	1	Plekha8	pleckstrin homology domain containing, family A (phosphoinositide binding specific) member 8 [Source:MGI Symbol;Acc:MGI:2681164]	21.9117	19.7025	21.1349	22.851	23.8797	22.26	20.9164	22.9969	-0.0605519	-0.124082	-0.0227476	-0.21388	-0.27741	-0.176076	-0.112632	-0.176162	-0.0748274
ENSMUSG00000005233	1.11989	0.16336	5.05894	0.215489	1	2	69193895	69206194	-1	Spc25	SPC25, NDC80 kinetochore complex component, homolog (S. cerevisiae) [Source:MGI Symbol;Acc:MGI:1913692]	40.207	33.4182	32.7852	30.3864	34.9528	29.7101	35.4701	31.6831	0.404022	0.20204	0.436491	0.137209	-0.0647735	0.169678	0.109619	-0.092363	0.142089
ENSMUSG00000005262	-1.04241	-0.0599255	6.28415	0.642458	1	16	18811779	18835261	1	Ufd1	ubiquitin recognition factor in ER-associated degradation 1 [Source:MGI Symbol;Acc:MGI:109353]	77.6011	74.4703	75.1793	77.1221	75.6098	84.1837	75.7502	78.9719	0.00893412	0.0375044	-0.117463	-0.0504793	-0.021909	-0.176877	-0.0368071	-0.00823687	-0.163205
ENSMUSG00000005267	1.09966	0.137061	3.33948	0.336459	1	11	62700356	62731905	-1	Zfp287	zinc finger protein 287 [Source:MGI Symbol;Acc:MGI:2176561]	10.7313	10.7698	10.555	9.27641	9.50715	10.3759	10.6854	9.71983	0.210189	0.174742	0.0485877	0.215358	0.179912	0.0537569	0.186286	0.150839	0.0246846
ENSMUSG00000005299	-1.04751	-0.0669639	5.72966	0.607223	1	5	33739673	33782817	-1	Letm1	leucine zipper-EF-hand containing transmembrane protein 1 [Source:MGI Symbol;Acc:MGI:1932557]	50.4656	53.1206	52.2272	52.9925	52.4291	57.7915	51.9378	54.4044	-0.0704895	-0.0550697	-0.195558	0.0034839	0.0189037	-0.121584	-0.020986	-0.00556619	-0.146054
ENSMUSG00000005312	1.04179	0.0590686	7.10984	0.645085	1	13	58176156	58215653	-1	Ubqln1	ubiquilin 1 [Source:MGI Symbol;Acc:MGI:1860276]	142.769	137.41	138.36	131.883	147.612	122.249	139.513	133.915	0.114427	-0.0481313	0.223862	0.0592352	-0.103323	0.168671	0.0691692	-0.0933891	0.178605
ENSMUSG00000005354	1.11576	0.158022	6.53637	0.220007	1	15	77915047	77929006	-1	Txn2	thioredoxin 2 [Source:MGI Symbol;Acc:MGI:1929468]	98.3783	91.1318	99.6251	91.2679	72.8415	95.0724	96.3784	86.3939	0.108232	0.433578	0.0493134	-0.00215266	0.323193	-0.0610716	0.126401	0.451748	0.0674825
ENSMUSG00000005362	-1.01287	-0.0184528	5.51704	0.891031	1	6	106780201	106800077	-1	Crbn	cereblon [Source:MGI Symbol;Acc:MGI:1913277]	42.5943	49.4145	47.8459	45.5387	55.8126	40.2369	46.6183	47.1961	-0.0964324	-0.389928	0.0821443	0.117841	-0.175654	0.296418	0.0713018	-0.222194	0.249879
ENSMUSG00000005370	-1.09223	-0.127274	5.80468	0.326683	1	17	87975050	87990883	1	Msh6	mutS homolog 6 [Source:MGI Symbol;Acc:MGI:1343961]	56.4931	53.8809	52.6753	58.7053	58.8604	60.5363	54.3497	59.3673	-0.0554161	-0.0592248	-0.0997261	-0.123717	-0.127526	-0.168027	-0.156362	-0.160171	-0.200672
ENSMUSG00000005371	1.06927	0.0966219	6.35632	0.45389	1	17	87990859	88065291	-1	Fbxo11	F-box protein 11 [Source:MGI Symbol;Acc:MGI:2147134]	81.454	78.1447	79.7349	75.4082	88.5843	59.8124	79.7779	74.6016	0.111264	-0.121065	0.445542	0.0514253	-0.180903	0.385704	0.0804896	-0.151839	0.414768
ENSMUSG00000005374	1.04101	0.0579787	5.0949	0.659698	1	5	135149657	135165760	1	Tbl2	transducin (beta)-like 2 [Source:MGI Symbol;Acc:MGI:1351652]	32.6431	36.3007	35.4239	32.1002	35.8196	32.3041	34.7892	33.408	0.0241946	-0.133972	0.0150588	0.177415	0.0192481	0.168279	0.142142	-0.0160251	0.133006
ENSMUSG00000005378	-1.0465	-0.065578	4.6128	0.623923	1	5	135052957	135064959	-1	Wbscr22	Williams Beuren syndrome chromosome region 22 [Source:MGI Symbol;Acc:MGI:1913388]	24.7482	24.8023	23.4251	26.5779	21.0276	28.7751	24.3252	25.4602	-0.102901	0.235042	-0.217496	-0.0997514	0.238191	-0.214346	-0.182171	0.155772	-0.296766
ENSMUSG00000005397	1.00018	0.000265211	10.5002	0.99844	1	13	13437551	13512269	1	Nid1	nidogen 1 [Source:MGI Symbol;Acc:MGI:97342]	1458.89	1316.71	1492.31	1450.66	1404.15	1412.36	1422.64	1422.39	0.00816705	0.0551757	0.046763	-0.139771	-0.0927622	-0.101175	0.0408415	0.0878502	0.0794374
[truncated: 11,481 more rows]

## Sheet: Gata4vsCtr
Feature.ID	FC	log2FC_Gata4_vs_control	logCPM	PValue	FDR	Chromosome	Start	End	Strand	Symbol	Description	Gata4.a_GT18.10895_GACGTCTT.GGTGAACC_S4.genes.results_counts_cpm	Gata4.b_GT18.10896_TGCGAGAC.CAACAATG_S10.genes.results_counts_cpm	Gata4.c_GT18.10897_CATAGAGT.TGGTGGCA_S12.genes.results_counts_cpm	cont.a_GT18.10901_GGTCACGA.CATAATAC_S5.genes.results_counts_cpm	cont.b_GT18.10902_CTGCTTCC.GATCTATC_S1.genes.results_counts_cpm	cont.c_GT18.10903_TCATCCTT.AGCTCGCT_S2.genes.results_counts_cpm	pos.mean	neg.mean
[truncated: 12,791 more rows]

[truncated: 1 more sheets: KEGG pathways]
