# Supplementary material for: Adult mouse fibroblasts retain organ-specific transcriptomic identity
Source: eLife. 2022 Mar 16;11:e71008. doi: 10.7554/eLife.71008 (PMC8959603; doi:10.7554/eLife.71008)
Supplement: Supplementary file 1. [file elife-71008-supp1.xlsx]

## Sheet: Sheet1
	Gene	Forward Primer	Reverse Primer	Total Size (bp)
	Bmp7	CTACATCCGGGAGCGATTTGA	TCCAGCAAGAAGAGGTCCGA	99
	Col1a2	GGCCCCCTGGTATGACTGGCT	CGCCACGGGGACCACGAATC	129
	Col2a1	TCATCTTGCCGCATCTGTGT	TGCCCCTTTGGCCCTAATTT	164
	Cyp11a1	TTCTCATGCGAGGGTCCCAA	CGGTCTTTCTTCCAGGCATCT	122
	Foxf1	TCTGTCCCCTTGCAACCCAG	CGACTGTGAGTGATACCGAGG	139
	Gata4	AGCTCCATGGGGTTCCCAGGC	GGGAGGGAGGGTCTCACCAGC	125
	Hhex	CGGACGGTGAACGACTACAC	AACCTCACTTGACCGCCTTT	119
	Hp	GCAAGAGAGGTCCACGATGAG	TCCACAGCAAAAAGCTGACC	75
	HPRT	TGACCAGTCAACAGGGGACA	TGCCTGACCAAGGAAAGCAA	135
	Hprt1	GCGAGGGAGAGCGTTGGGCT	CATCATCGCTAATCACGACGCTGGG	146
	Krt14	CGATGACTTCCGGACCAAGTT	CCTCTCATGGAGGCCATTTC	195
	Krt6a	TTCGTGACCCTGAAGAAGGAT	TTGCATCTGAGACAGTTCTGCTT	132
	Lhx9	CCAGATGCCAAGGACCTCAA	AAACGTCGGGATGTTTGGCT	107
	Pax8	ATCTGCAGCAAGTCGGCTC	ATGCCTGCGATAGCAGAAGAG	208
	Serpinb5	TATGCTCATTGTGCTCCCCA	CTGGGGTTGGTCCACTGTAA	105
	Tbx20	CCCCGCTGCCAGCCAGGCTCTA	GTGCACCCGTGGCTGGTACTTATGC	167
	Thy1	TGGGTGCAGCAACTGGAGGC	CTCGGGACACCTGCAAGACTGA	140
	Vimentin	GCCGAAAGCACCCTGCAGTCA	GCCTGCAGCTCCTGGATCTCTTCA	146

## Sheet: Sheet2
	Frzb	all 3 guides in exon 1
